# Supplementary material for: Midgut cell atlas and virome of four important mosquito species and immune landscapes of dengue virus infection
Source: Research Square preprint supplement (doi:10.21203/rs.3.rs-7214530/v1), 2025-08-11
Supplement: Supplementary file 1 [file 0116d4be33d914b98cd8da0b.docx]

**Supplementary Figures**


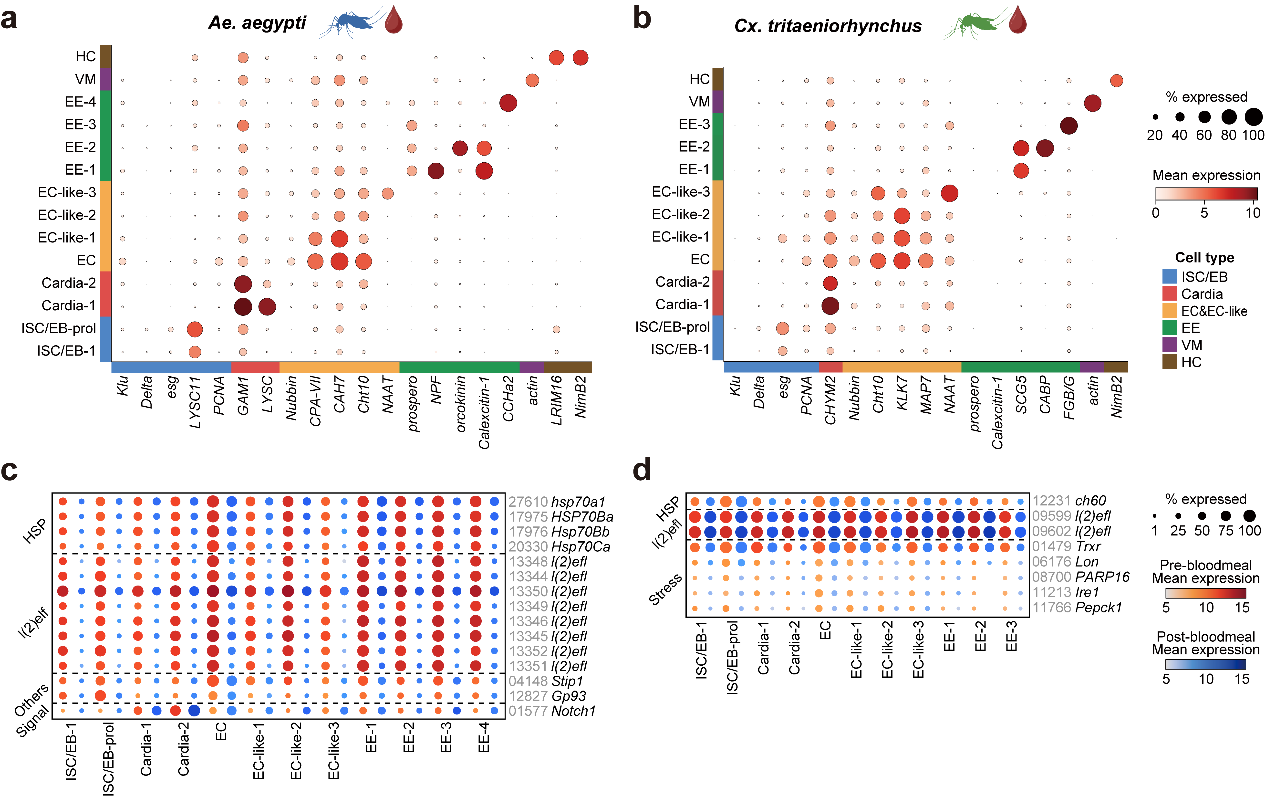


**Supplementary Fig. 1 Marker and gene expression of midgut cell populations pre- and post-bloodmeal in *Ae. aegypti* and *Cx. tritaeniorhynchus*. a-b,** Expression of marker genes in the integrated cell clusters of *Ae. aegypti* and *Cx. tritaeniorhynchus* pre- and post-bloodmeal. Dot size represents the percentages of cells expressing each gene and color shows the mean gene expression. The absence of dots means lacking of the corresponding gene in the species. **c-d,** DEGs in the major midgut cell clusters in *Ae. aegypti* (c) and *Cx. tritaeniorhynchus* (d), respectively*.* Dot size represents the percentages of cells expressing each gene and color shows the relative mean gene expression for pre- (red) and post-bloodmeal (blue).


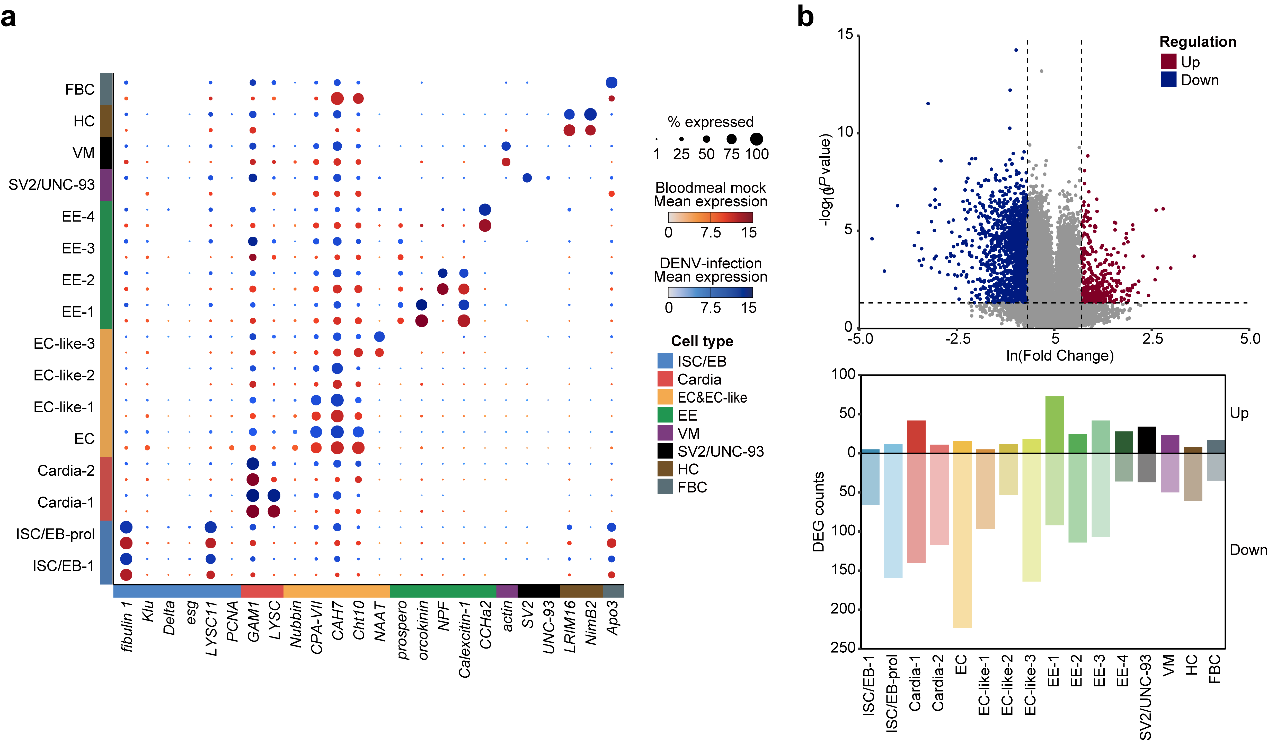


**Supplementary Fig. 2 The expression of marker genes and DEG in DENV-2 infected *Ae. aegypti*. a,** Expression of marker genes in each cell clusters in *Ae. aegypti* between the bloodmeal group versus DENV-infection. Dot size represents the percentages of cells expressing each gene and color shows the relative mean gene expression between the bloodmeal group (red) versus DENV-infection (blue). **b,** The DEG statistics in between the bloodmeal group versus DENV-infection. The volcano plot shows the DEGs with the thresholds (|ln(FC)| >= 1, p < 0.05) and the bar plot shows the number of DEGs in each cell cluster post-infection. Each dot in the volcano plot represents a gene and color shows the upregulation (red) or downregulation (blue) of the gene post-infection.


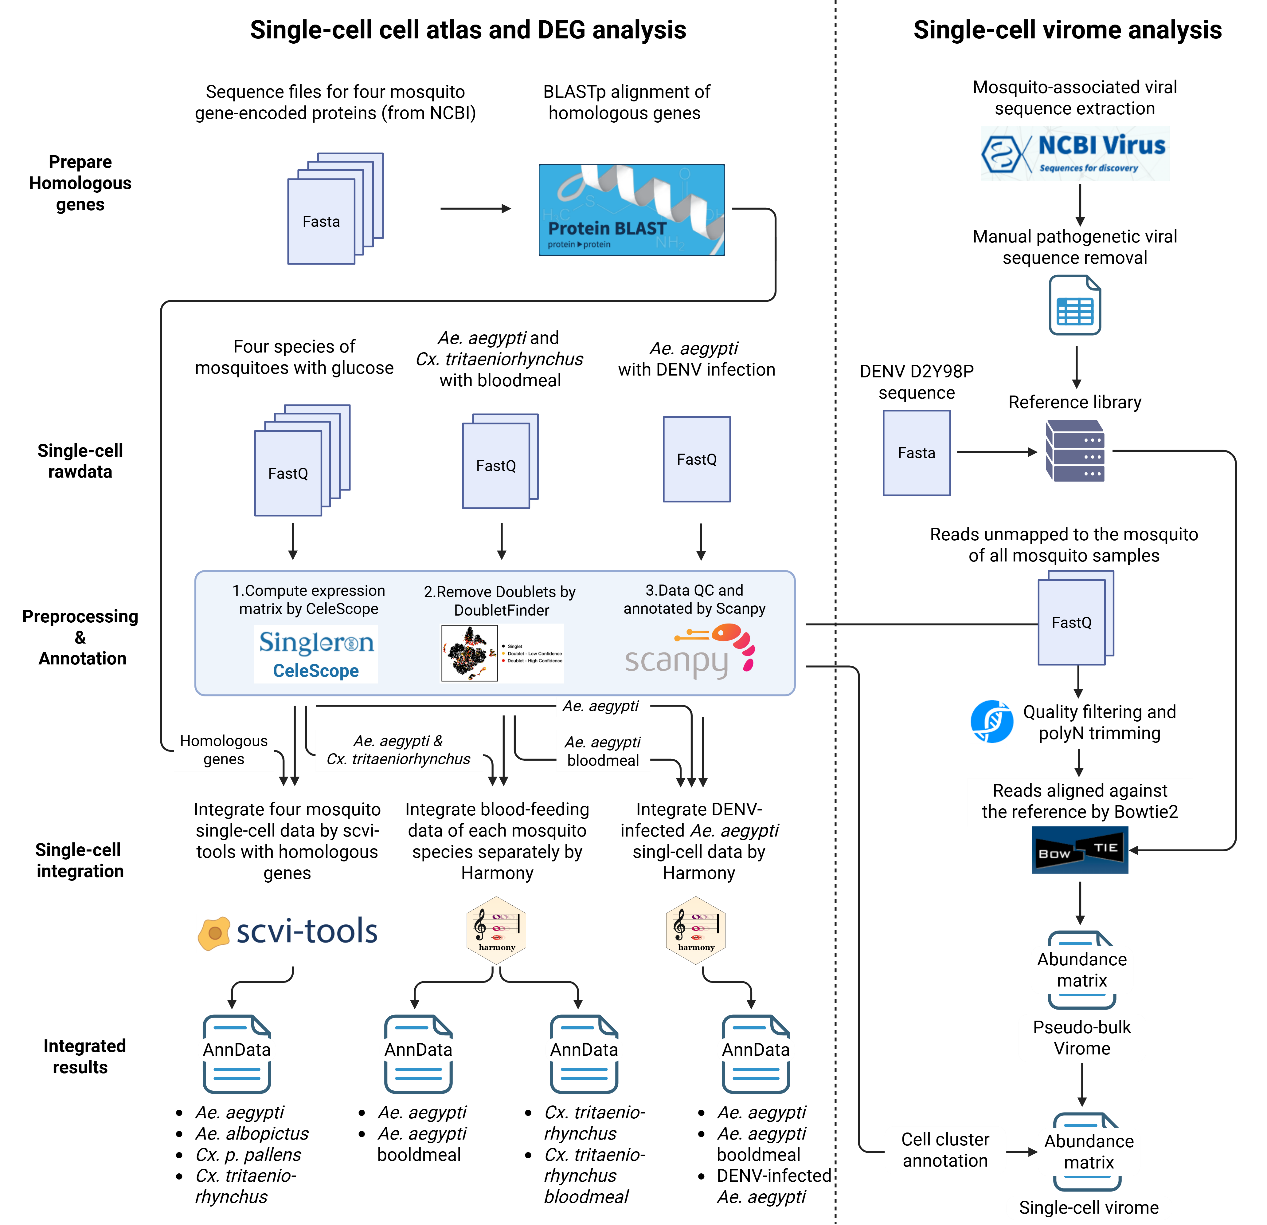


**Supplementary Fig. 3 Workflow for data analysis in this study.**
