# Supplementary material for: Midgut cell atlas and virome of four important mosquito species and immune landscapes of dengue virus infection
Source: Research Square preprint supplement (doi:10.21203/rs.3.rs-7214530/v1), 2025-08-11
Supplement: Supplementary file 2 [file 1edf89e10764c57f0c0a0a22.xlsx]

## Sheet: Sheet1
scRNA-seq data metrics of all mosquitoe samples
Sample	Sample Metadata				Raw data					Processed data
	Species	Bloodmeal at 7 dpe	Sampling Time	Number of Midguts	Reads	Q30 Bases in Barcode	Q30 Bases in RNA Read	Q30 Bases in UMI	Reads Mapped Confidently To Transcriptome	Estimated cells	Mean reads per cell	Median UMI counts per cell	Median genes per cell	Total genes detected	Mitochondrial ratio
aae	Ae. aegypti	/	7	160	434858099	0.9491	0.9248	0.9361	0.7864	12853	28600	5141	828	13511	0.0958
aae_bl		Uninfectious bloodmeal	14	120	494481124	0.9503	0.9432	0.9528	0.8279	12501	36167	7929	984	13212	0.1033
aae_denv		Infectious bloodmeal with DENV	14	200	597046196	0.9842	0.9743	0.9822	0.8393	20930	20930	4545	770	13219	0.0401
aal	Ae. albopictus	/	7	120	504237227	0.9555	0.9489	0.956	0.6546	19120	23021	3304	836	18082	0.0545
cxpip	Cx. p. pallens	/	7	80	505530715	0.8841	0.9125	0.8999	0.822	18373	27041	3295	510	14631	0.035
cxtri	Cx. tritaeniorhynchus	/	7	180	601281968	0.9623	0.937	0.9509	0.4758	8455	50617	4745	939	10594	0.0811
cxtri_bl		Uninfectious bloodmeal	14	165	514244080	0.9641	0.9337	0.9649	0.3987	7821	68368	4522	882	10911	0.1132
* Except for the blood meal at 7 dpe, glucose was provided at all other time points.
