# Supplementary material for: Midgut cell atlas and virome of four important mosquito species and immune landscapes of dengue virus infection
Source: Research Square preprint supplement (doi:10.21203/rs.3.rs-7214530/v1), 2025-08-11
Supplement: Supplementary file 3 [file 65a70fc698e05fdd594d0108.docx]

| **Supplementary Table 1. Marker genes of cell clusters across the mosquito species** | | | | | | |
| --- | --- | --- | --- | --- | --- | --- |
| **Cluster** | **Gene** | **Accession in** | | | | **VectorBase ID** |
| ***Ae. aegypti*** | ***Ae. albopictus*** | ***Cx. p. pallens*** | ***Cx. tritaeniorhynchus*** | of Ae. aegypti |
| ISC/EB | fibulin 1 | LOC5563695 | LOC109621451 | NA | CTRY008281 | AAEL000549 |
| Klu | LOC5578162 | LOC109398650 | LOC120420813 | CTRY005145 | AAEL013544 |
| Delta | LOC5580156 | LOC109411919 | LOC120417918 | CTRY006068 | AAEL025606 |
| esg | LOC5570443 | LOC109407308 | LOC120429678 | CTRY004136 | AAEL008336 |
| LYSC11 | LOC110676293 | LOC109424283 | LOC120418999 | NA | AAEL003723 |
| PCNA | LOC5580247 | LOC109427955 | LOC120422198 | CTRY005970 | AAEL012545 |
| Cardia | GAM1 | LOC5564993 | LOC109622804 | LOC120425153 | NA | AAEL004522 |
| CHYM2 | LOC5572257 | LOC115258128 | LOC120421359 | CTRY006126 | AAEL009680 |
| LYSC | LOC5579458 | LOC109429051 | LOC120422630 | NA | AAEL015404 |
| EC & EC-like | Nubbin | LOC23687865 | LOC109404634 | LOC120427085 | CTRY003519 | AAEL017445 |
| CPA-VII | LOC5573855 | NA | LOC120428198 | NA | AAEL010776 |
| CG1139 | LOC110676249 | LOC109433016 | LOC120412616 | CTRY000923 | AAEL024520 |
| CAH7 | LOC5571803 | LOC109427544 | LOC120420175 | CTRY000579 | AAEL009330 |
| Cht10 | LOC5574806 | LOC109415748 | LOC120426794 | CTRY009069 | AAEL002467 |
| BTBD3 | LOC5572376 | LOC109405350 | LOC120412869 | CTRY000116 | AAEL009769 |
| KLK7 | NA | NA | NA | CTRY009956 |  |
| MAP7 | LOC5579996 | LOC109413956 | LOC120412890 | CTRY009123 | AAEL025915 |
| NAAT | LOC5570613 | LOC109406368 | LOC120424932 | CTRY001811 | AAEL008424 |
| EE | prospero | LOC5575988 | LOC109398973 | LOC120423418 | CTRY001973 | AAEL002769 |
| orcokinin | LOC5569132 | LOC109425743 | LOC120429116 | NA | AAEL007391 |
| NPF | LOC5575886 | LOC109432151 | LOC120415737 | NA | AAEL002733 |
| Calexcitin-1 | LOC5573874 | LOC109432158 | NA | CTRY002594 | AAEL010789 |
| CCHa2 | LOC5565599 | LOC109408266 | NA | CTRY002914 | AAEL026488 |
| SCG5 | LOC5573386 | LOC109420023 | LOC120415972 | CTRY004723 | AAEL002055 |
| CABP | LOC5571151 | LOC109428219 | LOC120414678 | CTRY005940 | AAEL008844 |
| FGB/G | LOC5568255 | LOC109421140 | LOC120424080 | CTRY007102 | AAEL006704 |
| VM | actin | LOC5571832 | LOC115267287 | LOC120429254 | CTRY009277 | AAEL001673 |
| HC | LRIM16 | LOC5570883 | LOC109398853 | LOC120421492 | NA | AAEL008658 |
| NimB2 | LOC110674010 | NA | LOC120415515 | CTRY004212 | AAEL019650 |
| FBC | Apo3 | LOC5571084 | LOC109408437 | LOC120414845 | CTRY011444 | AAEL008789 |
| NA means that the gene is absent in this species. | | | | | | |
