# Supplementary material for: Midgut cell atlas and virome of four important mosquito species and immune landscapes of dengue virus infection
Source: Research Square preprint supplement (doi:10.21203/rs.3.rs-7214530/v1), 2025-08-11
Supplement: Supplementary file 4 [file c3e775c376f1145b06f4353c.xlsx]

## Sheet: Sheet1
Mean Expression of DEG orthologs in the other three mosquito species compared with Ae. aegypti
Regulation in DENV-infected Ae. aegypti	Ae. aegypti		Ae. albopictus		Cx. p. pallens		Cx. tritaeniorhynchus
	Accession	Mean	Accession	Mean	Accession	Mean	Accession	Mean
Up	LOC110673981	0.123065	LOC109427304	0.0502908	LOC120415083	0.119159	CTRY012482	0.152487
Up	LOC110674163	0.268968	LOC109402435	0.157087	LOC120421779	0.400447	CTRY002999	0.437275
Up	LOC110674796	0.13876	LOC109415239	0.228817	LOC120432332	0.176859	CTRY000438	0.171053
Up	LOC110675257	0.081827	LOC109411751	0.212453	LOC120429839	0.840918	CTRY003448	0.80155
Up	LOC110675318	0.620305	LOC109422005	0.3554	LOC120421456	1.11103	CTRY001268	2.3832
Up	LOC110675613	0.121442	LOC109419661	0.0742388	LOC120425973	0	CTRY008959	0.055155
Up	LOC110675634	0.0450265	LOC109397899	0.0968183	LOC120431153	0.0199106	CTRY001149	0.02938
Up	LOC110675740	0.0439442	LOC109397867	0.0664842	LOC120422446	0.124949	CTRY001153	0.160418
Up	LOC110675781	0.0624526	LOC109426761	0.240905	LOC120420686	0.00497765	CTRY009255	0.0216294
Up	LOC110675782	0.0496807	LOC109417814	0.0477249	LOC120420670	0.0377895	CTRY009246	0.0439798
Up	LOC110675803	0.053469	LOC109426813	0.0823355	LOC120413193	0.165075	CTRY009730	0.16186
Up	LOC110676045	75.8082	LOC109425736	21.6735	LOC120424862	36.9292	CTRY009594	6.40267
Up	LOC110676091	0.130317	LOC115256422	0.219922	LOC120430987	0.223994	CTRY000455	0.390771
Up	LOC110676223	0.0325793	LOC109398055	0.0548523	LOC120424974	0.016152	CTRY010054	0.0270368
Up	LOC110676224	0.122199	LOC109399485	0.118143	LOC120424977	0.329541	CTRY010059	0.54416
Up	LOC110676232	29.1437	LOC109404346	13.2045	LOC120424488	28.3274	CTRY010122	10.265
Up	LOC110676249	0.354043	LOC109433016	0.00433345	LOC120412616	1.00985	CTRY000923	0
Up	LOC110676307	0.0519537	LOC115270189	0.115007	LOC120413413	0.212109	CTRY010680	0.152487
Up	LOC110676860	0.0426453	LOC115253935	0.0974456	LOC120415469	0.0222471	CTRY004987	0.0699351
Up	LOC110676901	0.0773893	LOC109397930	0.00729844	LOC120415089	0.0126981	CTRY000057	0.0142394
Up	LOC110677076	0.0778223	LOC115259625	0.648078	LOC120424016	0.00375863	CTRY003091	0
Up	LOC110677764	33.5446	LOC109406734	27.2637	LOC120431023	5.63592	CTRY005630	33.8425
Up	LOC110677853	0.193852	LOC109408366	0.131999	LOC120417015	0.103007	CTRY007142	0.123648
Up	LOC110677919	49.2419	LOC109424715	0.000342114	LOC120415873	33.5142	CTRY007845	26.3764
Up	LOC110678029	0.821193	LOC115262585	0.703216	LOC120428187	0.212922	CTRY007065	0.313446
Up	LOC110678469	0.48003	LOC109415665	0.873019	LOC120423855	0.717594	CTRY012291	0.85292
Up	LOC110678734	23.0454	LOC109425568	4.28601	LOC120419254	21.6746	CTRY011808	0
Up	LOC110678895	0.0622362	LOC109417350	0.0250314	LOC120423442	0.0606461	CTRY011008	0.0394737
Up	LOC110678949	1.40589	LOC115261471	10.3661	LOC120426530	0.261174	CTRY010888	17.1619
Up	LOC110678983	0.619981	LOC115271083	0.338294	LOC120414391	0.379114	CTRY011382	0.162401
Up	LOC110679043	0.0560667	LOC109410624	0.0970464	LOC120415857	0.0163551	CTRY007872	0.0218097
Up	LOC110679163	0.193852	LOC109427263	0.083704	LOC120418238	0.000812678	CTRY010856	0.152307
Up	LOC110679353	0.817404	LOC109401240	0.251967	LOC120421446	0.52692	CTRY006700	1.10004
Up	LOC110679379	0.0403723	LOC109623298	0.0615806	LOC120421465	0.0680618	CTRY006696	0.063266
Up	LOC110681498	0.317675	LOC109399951	0.407458	LOC120430224	0.657456	CTRY002221	1.46936
Up	LOC23687404	3.97153	LOC109413713	5.12744	LOC120416302	11.9918	CTRY005381	18.3025
Up	LOC23687495	1.86167	LOC109404332	1.32142	LOC120424480	2.38948	CTRY010124	1.24045
Up	LOC23687579	0.153696	LOC109420687	0.208177	LOC120412802	0	CTRY004466	0.0533526
Up	LOC23687616	0.0768481	LOC109422062	0.0310184	LOC120432411	0.458147	CTRY000873	0.0133381
Up	LOC23687618	63.1798	LOC109431357	31.8515	LOC120418068	0	CTRY001711	36.3915
Up	LOC23687624	0.188116	LOC109622164	0.263998	LOC120422576	0.253149	CTRY004932	0.239726
Up	LOC23687632	1.05845	LOC109420460	2.28452	LOC120429844	2.55689	CTRY003445	1.33598
Up	LOC23687643	0.0797705	LOC109409078	0.160338	LOC120416858	0.169951	CTRY002573	0.131038
Up	LOC23687671	0.263665	LOC109424480	0.773805	LOC120418661	0.211499	CTRY010533	0.291096
Up	LOC23687721	0.104557	LOC109418321	0.0472118	LOC120413760	0.0244819	CTRY012205	0.0706561
Up	LOC23687740	0.721507	LOC109400780	0.0612955	LOC120420109	0.000812678	CTRY009420	3.28947
Up	LOC23687827	0.579825	LOC109424044	0.702988	LOC120413976	0.00812678	CTRY011226	0.0155011
Up	LOC23687841	0.371252	LOC109419547	0.296556	LOC120425472	0.575985	CTRY001867	0.531182
Up	LOC23687867	0.892629	LOC109413608	0.633025	LOC120417983	0.662637	CTRY006548	0.592826
Up	LOC23687936	23.0737	LOC109418991	15.1242	LOC120426907	34.9844	CTRY008704	23.184
Up	LOC23687946	0.0622362	LOC109403126	0.0816513	LOC120424482	0.132771	CTRY010123	0.138248
Up	LOC5563588	0.0920013	LOC109415496	0.0537119	LOC120417126	0.0823852	CTRY011763	0.0996756
Up	LOC5563590	17.5349	LOC109400853	10.6762	LOC120417150	16.2991	CTRY011760	19.0337
Up	LOC5563592	25.3661	LOC109400867	28.5693	LOC120417163	98.7125	CTRY011759	70.6759
Up	LOC5563625	0.118736	LOC134289775	0.089691	LOC120417148	0.094169	CTRY011774	0.109409
Up	LOC5563630	0.126962	LOC109412581	0.190558	LOC120426691	0.0345388	CTRY002026	0.0302812
Up	LOC5563639	0.100768	LOC109400850	0.0833618	LOC120415899	0.0129013	CTRY011629	0.0638068
Up	LOC5563646	64.4644	LOC109416769	24.8423	LOC120415928	83.891	CTRY011632	23.3771
Up	LOC5563647	0.0719775	LOC109416759	0.0686509	LOC120415902	0.0216375	CTRY011630	0.0315429
Up	LOC5563671	0.0952484	LOC109407646	0.0965903	LOC120425824	0.0973182	CTRY008279	0.100216
Up	LOC5563691	0.0373417	LOC109407693	0.0364352	LOC120425837	0.0831979	CTRY008280	0.0252343
Up	LOC5563743	0.0684057	LOC115267257	0.10674	LOC120418931	0.0459163	CTRY009190	0.216655
Up	LOC5563771	0.133023	LOC109423693	0.100582	LOC120413569	0.0650142	CTRY005017	0.0346071
Up	LOC5563781	0.0455677	LOC109418327	0.026856	LOC120414891	0.0945754	CTRY012200	0.224766
Up	LOC5563784	0.0606126	LOC109427300	0.0673965	LOC120415115	0.0416497	CTRY012197	0.0515501
Up	LOC5563786	39.2143	LOC109428105	19.3728	LOC120414851	73.2823	CTRY012202	44.482
Up	LOC5563791	0.174694	LOC109418322	0.0767476	LOC120414373	0.104835	CTRY012207	0.0675919
Up	LOC5563827	0.189631	LOC109427043	0.0827916	LOC120422953	0.0414466	CTRY007641	0.215032
Up	LOC5563945	0.0550925	LOC115253444	0.0342684	LOC120427670	0.0546526	CTRY000490	0.0266763
Up	LOC5563977	0.0545514	LOC109406532	0.0596989	LOC120425932	0.0510971	CTRY011052	0.0877794
Up	LOC5564010	0.180431	LOC109402081	0.162846	LOC120424263	0.195449	CTRY001207	0.242249
Up	LOC5564011	0.54573	LOC109427363	0.0730414	LOC120418035	0.430211	CTRY001206	0.197008
Up	LOC5564012	0.568893	LOC109402079	0.422739	LOC120418409	0.255282	CTRY001205	0.222603
Up	LOC5564039	0.515748	LOC109427769	0.741476	LOC120430120	0.627489	CTRY001722	1.87473
Up	LOC5564041	1.29679	LOC109431348	0.576577	LOC120418066	0.656948	CTRY001715	0.442141
Up	LOC5564058	0.307501	LOC109427777	0.290569	LOC120425019	0.317351	CTRY001623	0.496575
Up	LOC5564062	0.0937331	LOC109431339	0.113867	LOC120429251	0.524177	CTRY001718	0.178623
Up	LOC5564076	0.126529	LOC109428448	0.0864979	LOC120432257	0.0877692	CTRY000169	0.194124
Up	LOC5564088	0.11787	LOC109408290	0.0932261	LOC120431637	0.166193	CTRY002941	0.0798486
Up	LOC5564151	0.129343	LOC109422130	0.0917436	LOC120413371	0.114791	CTRY001540	0.193403
Up	LOC5564179	0.318649	LOC115254042	0.386703	LOC120414427	0.468102	CTRY011388	0.660598
Up	LOC5564212	32.2985	LOC109621247	12.268	LOC120420076	33.2881	CTRY009438	25.9402
Up	LOC5564228	0.105423	LOC109406439	0.164671	LOC120419979	0.293478	CTRY010243	0.118061
Up	LOC5564255	0.106397	LOC109431170	0.152583	LOC120413708	0.0901056	CTRY001322	1.18115
Up	LOC5564297	0.188549	LOC109421749	0.0664842	LOC120420632	0.0598334	CTRY012647	0.457642
Up	LOC5564308	0.0835588	LOC109403784	0.0859847	LOC120419980	0.0201138	CTRY010237	0.128154
Up	LOC5564319	0.112891	LOC109421752	0.119398	LOC120420635	0.305973	CTRY012645	0.553172
Up	LOC5564333	0.2523	LOC109413613	0.127209	LOC120417969	0.338785	CTRY006555	0.047044
Up	LOC5564364	0.368113	LOC109408764	0.37165	LOC120430842	0.258838	CTRY007824	0.213951
Up	LOC5564391	0.0839918	LOC109402222	0.0823925	LOC120414519	0.120276	CTRY001125	0.114636
Up	LOC5564459	0.348955	LOC109413498	0.0443608	LOC120413485	0.129317	CTRY009697	0.0173035
Up	LOC5564492	0.292889	LOC109425142	0.324666	LOC120413135	0.367026	CTRY005535	0.887527
Up	LOC5564517	0.257495	LOC109417965	0.12835	LOC120421541	0.34935	CTRY009412	0.20602
Up	LOC5564520	0.120468	LOC109399757	0.169233	LOC120416962	0.034742	CTRY011903	0.0693944
Up	LOC5564532	0.194177	LOC109401844	0.125328	LOC120422048	0.335331	CTRY000381	0.392754
Up	LOC5564541	0.418011	LOC109427547	0.363325	LOC120426262	0.62759	CTRY005706	1.71593
Up	LOC5564542	0.446044	LOC115254943	0.553997	LOC120422617	0.658269	CTRY005705	1.43547
Up	LOC5564544	0.147851	LOC115266987	0.130117	LOC120426263	0.38267	CTRY005707	0.199892
Up	LOC5564556	26.5213	LOC109427514	9.10081	LOC120430857	20.2291	CTRY005713	12.9706
Up	LOC5564601	0.0796623	LOC134287602	0.027084	LOC120425703	0.00548558	CTRY001801	0.107606
Up	LOC5564713	62.7375	LOC109428462	36.1294	LOC120432237	80.1586	CTRY000160	83.5461
Up	LOC5564724	0.214309	LOC109433635	0.214734	LOC120419283	0.362962	CTRY001391	1.12653
Up	LOC5564732	0.0976296	LOC115257682	0.304026	LOC120420379	0.804653	CTRY006588	0.038212
Up	LOC5564749	0.115597	LOC109426416	0.159482	LOC120414944	0.169342	CTRY007234	0.943944
Up	LOC5564753	0.119602	LOC134283913	0.0632341	LOC120426506	0	CTRY007241	0.259553
Up	LOC5564756	0.367572	LOC109403754	0.384365	LOC120426507	1.61093	CTRY007243	0.850396
Up	LOC5564766	0.0569326	LOC109411979	0.0452731	LOC120423157	0.0316944	CTRY006094	0.038212
Up	LOC5564775	0.0947072	LOC115253431	0.0367203	LOC120419398	0.162637	CTRY006086	0.651586
Up	LOC5564784	0.0678645	LOC109424530	0.0466416	LOC120416178	0.14425	CTRY012624	0.0659697
Up	LOC5564786	0.11235	LOC109424545	0.0827346	LOC120419395	0.100975	CTRY006084	0.1615
Up	LOC5564792	0.213227	LOC109411982	0.257441	LOC120423151	0.136225	CTRY006091	0.258291
Up	LOC5564796	0.0888624	LOC109411968	0.0153951	LOC120429732	0.0398212	CTRY006096	0.0255948
Up	LOC5564798	3.36313	LOC115269424	3.88345	LOC120424117	0.281187	CTRY006115	4.18295
Up	LOC5564809	0.303929	LOC109397080	0.395427	LOC120426701	0.160809	CTRY002016	0.342826
Up	LOC5564835	0.0894036	LOC109414027	0.100296	LOC120416083	0.550792	CTRY005339	0.908435
Up	LOC5564842	0.181188	LOC109419322	0.101551	LOC120424983	0.282304	CTRY003779	0.33057
Up	LOC5564882	0.113973	LOC109409560	0.114665	LOC120429830	0.296526	CTRY011701	0.873288
Up	LOC5564884	0.090486	LOC109430456	0.0770897	LOC120417510	0.0370784	CTRY011712	0.0834535
Up	LOC5564891	0.0445936	LOC109409574	0.0521724	LOC120417534	0.0594271	CTRY011710	0.0373107
Up	LOC5564921	8.37125	LOC109429586	7.59266	LOC120423393	2.47156	CTRY003647	2.19737
Up	LOC5564925	3.65483	LOC109426506	1.61729	LOC120423392	1.13876	CTRY003652	1.20656
Up	LOC5564926	0.116246	LOC109429582	0.0685939	LOC120423406	0.0922389	CTRY003650	0.0980533
Up	LOC5564935	0.0453512	LOC115254140	0.0154522	LOC120423389	0.0508939	CTRY003636	0.0775054
Up	LOC5564972	0.686979	LOC109397524	0.730015	LOC120420891	0.259244	CTRY004588	0.186734
Up	LOC5564994	0.11354	LOC109397548	0.18343	LOC120430192	0.0415481	CTRY005833	0.121125
Up	LOC5564995	0.157052	LOC109621499	0.0244042	LOC120427330	0.00416497	CTRY004760	0.0167628
Up	LOC5565024	0.0602879	LOC109397900	0.0340404	LOC120422473	0.104226	CTRY001155	0.118962
Up	LOC5565025	0.188657	LOC109397852	0.110161	LOC120422466	0.232223	CTRY001157	1.30209
Up	LOC5565051	0.246672	LOC109430882	0.208975	LOC120425480	0.323649	CTRY001850	0.288212
Up	LOC5565063	0.0409135	LOC109412100	0.0546242	LOC120428782	0.0138155	CTRY001847	0.0423576
Up	LOC5565085	0.17989	LOC109415235	0.245125	LOC120424175	0.350366	CTRY001262	0.659517
Up	LOC5565116	0.0944907	LOC109397187	0.160509	LOC120413005	0.0899025	CTRY000896	0.0275775
Up	LOC5565118	0.255006	LOC109407239	0.173452	LOC120420617	0.190675	CTRY004561	0.150324
Up	LOC5565138	0.065808	LOC109432047	0.0996123	LOC120422560	0.0768996	CTRY002835	0.148162
Up	LOC5565143	0.138543	LOC109404012	0.0998403	LOC120422558	0.114384	CTRY002834	0.0973324
Up	LOC5565156	1.78883	LOC109432057	2.84964	LOC120432082	0.0200122	CTRY002165	8.1168
Up	LOC5565159	0.207057	LOC109432062	0.214848	LOC120423560	0.222775	CTRY002658	0.255948
Up	LOC5565190	0.0861565	LOC109428515	0.556734	LOC120418114	0.292056	CTRY001428	0.899243
Up	LOC5565221	0.2615	LOC109417267	0.183658	LOC120418891	0.0753759	CTRY009090	0.315249
Up	LOC5565229	0.109969	LOC109420360	0.0589577	LOC120431767	0	CTRY006816	0.0546143
Up	LOC5565246	0.188981	LOC109410517	0.143631	LOC120430753	0.79551	CTRY010330	0.352199
Up	LOC5565265	0.114406	LOC109419673	0.112556	LOC120430803	0.078525	CTRY001823	0.148702
Up	LOC5565275	0.0342028	LOC109432371	0.0133425	LOC120422227	0.0292564	CTRY001276	0.0612833
Up	LOC5565281	0.04297	LOC109407202	0.0354088	LOC120420046	0.143438	CTRY004528	0.120584
Up	LOC5565301	0.315943	LOC109419754	0.338522	LOC120423458	0	CTRY004630	0.0185652
Up	LOC5565307	0.423098	LOC109419757	0.105086	LOC120423472	0.0805567	CTRY004629	0.474766
Up	LOC5565316	0.172097	LOC115255033	0.0306762	LOC120423480	0.106156	CTRY004624	0.0450613
Up	LOC5565328	0.228813	LOC109419740	0.1381	LOC120416772	0.303027	CTRY004631	0.658255
Up	LOC5565340	0.108453	LOC109428950	0.0856426	LOC120415375	0.0896993	CTRY007395	0.0865177
Up	LOC5565400	4.03323	LOC134287870	4.12476	LOC120424903	7.07873	CTRY005425	0.427361
Up	LOC5565437	0.177292	LOC109426030	0.0045045	LOC120422223	0.0147298	CTRY007924	0.00126172
Up	LOC5565440	0.154995	LOC109426040	0.101665	LOC120422236	0.201646	CTRY007931	0.186734
Up	LOC5565441	1.62756	LOC109426026	1.39018	LOC120422206	1.52276	CTRY007919	2.18745
Up	LOC5565445	0.307609	LOC109426042	0.476394	LOC120422221	0.135819	CTRY007933	6.8823
Up	LOC5565453	1.46001	LOC109426035	5.57173	LOC120422211	1.88673	CTRY007927	4.15357
Up	LOC5565455	0.162572	LOC115253491	0.10731	LOC120422237	0.00507924	CTRY007912	0.0147801
Up	LOC5565474	52.8981	LOC115263538	3.31435	LOC128092880	0.00101585	CTRY006506	0.0174838
Up	LOC5565500	0.0632103	LOC109418654	0.00216672	LOC120416222	0.0333198	CTRY006574	0.253605
Up	LOC5565516	0.109536	LOC109412698	0.0980157	LOC120424090	0.0252946	CTRY005580	0.054434
Up	LOC5565540	0.242342	LOC109410793	0.295473	LOC120432434	0.125356	CTRY009325	0.27217
Up	LOC5565541	1.98582	LOC109413483	1.00046	LOC120430782	1.46607	CTRY009323	0.967916
Up	LOC5565544	39.6313	LOC109413463	7.13035	LOC120416489	32.7077	CTRY009488	50.3518
Up	LOC5565589	2.87553	LOC109415927	2.04339	LOC120431859	2.54581	CTRY002647	4.82498
Up	LOC5565590	0.0319299	LOC109415928	0.0142548	LOC120417075	0.00345388	CTRY003431	0.0115357
Up	LOC5565605	0.176318	LOC109408271	0.141065	LOC120424856	0.00294596	CTRY002908	0.13987
Up	LOC5565618	0.482628	LOC115257630	0.112042	LOC120424549	0.21729	CTRY005693	0.165105
Up	LOC5565624	31.8392	LOC109407944	0.792508	LOC120418490	17.9576	CTRY009827	4.97026
Up	LOC5565635	0.163329	LOC134285831	0.364979	LOC120431748	0.0356562	CTRY002931	0.108327
Up	LOC5565637	0.13508	LOC134285834	0.205497	LOC120431739	0.381654	CTRY002930	0.266763
Up	LOC5565651	0.0651586	LOC109420256	0.0392861	LOC120415730	0.0970134	CTRY010352	0.497477
Up	LOC5565657	0.38305	LOC109420244	0.29992	LOC120415766	0.311764	CTRY010345	0.256489
Up	LOC5565680	0.0650503	LOC134287962	0.0755502	LOC120418320	0.0248883	CTRY005652	0.212689
Up	LOC5565683	0.104557	LOC115257373	0.0555365	LOC120418295	0.0729378	CTRY005666	0.0976929
Up	LOC5565685	0.176642	LOC109407286	0.104459	LOC120420541	0.0673507	CTRY004520	0.0324441
Up	LOC5565700	5.55515	LOC109412353	1.73902	LOC120418286	6.81786	CTRY005665	2.42304
Up	LOC5565701	8.02814	LOC109411963	4.05246	LOC120423165	0.518793	CTRY006098	15.5339
Up	LOC5565741	0.0427535	LOC109428933	0.0829627	LOC120415407	0.0956928	CTRY007409	0.0695746
Up	LOC5565774	0.202728	LOC109415040	0.73412	LOC120422963	0.383178	CTRY004914	0.753064
Up	LOC5565801	1.55536	LOC115267753	0.198141	LOC120419306	0.0764933	CTRY007425	0.156813
Up	LOC5565804	1.71653	LOC115253482	0.114779	LOC120419307	0.221556	CTRY007426	0.356164
Up	LOC5565832	0.0936248	LOC109402578	0.0794845	LOC120432438	0.067757	CTRY003984	0.107967
Up	LOC5565854	0.281091	LOC109402598	0.280477	LOC120432423	0.158167	CTRY004068	0.687996
Up	LOC5565862	0.0130967	LOC109407024	0.00946516	LOC120420517	0.00436814	CTRY003860	0.0091925
Up	LOC5565900	0.0748999	LOC109429538	0.0879804	LOC120412500	0.0728362	CTRY003566	0.0836337
Up	LOC5565901	0.0767399	LOC109429539	0.0503478	LOC120412497	0.00853312	CTRY003565	0.0479452
Up	LOC5565919	0.0949237	LOC109429546	0.118029	LOC120417289	0.026412	CTRY003537	0.091204
Up	LOC5565923	0.0910272	LOC109429888	0.0671114	LOC120426271	0.0458147	CTRY003896	0.0690339
Up	LOC5565948	0.0266263	LOC109424850	0.0282814	LOC120420777	0.00965055	CTRY003351	0.0178443
Up	LOC5565979	29.3416	LOC109413884	12.0965	LOC120423961	22.5839	CTRY012311	23.9625
Up	LOC5566059	2.53025	LOC109400800	2.98375	LOC120425962	2.10738	CTRY008089	8.38645
Up	LOC5566087	3.32882	LOC109427648	1.14454	LOC120426437	1.43041	CTRY001659	8.82624
Up	LOC5566092	3.88538	LOC109406928	4.36332	LOC120426846	6.03901	CTRY005175	14.7954
Up	LOC5566097	0.0597467	LOC115266637	0.0614665	LOC120431712	0.0481512	CTRY002946	0.121846
Up	LOC5566155	0.154021	LOC109423651	0.148193	LOC120419718	0.0865502	CTRY012003	0.108688
Up	LOC5566219	0.253058	LOC109409964	0.240335	LOC120422433	0.103007	CTRY008273	0.000180245
Up	LOC5566220	7.38045	LOC115265746	5.83721	LOC120429967	15.6879	CTRY009020	2.29488
Up	LOC5566228	48.6983	LOC115255627	11.5628	LOC120421054	45.9915	CTRY000360	36.447
Up	LOC5566235	0.113649	LOC115260243	0.122135	LOC120429654	0.0579033	CTRY010339	0.0814708
Up	LOC5566236	1.81665	LOC109409973	0.890124	LOC120430366	1.1155	CTRY009016	2.8394
Up	LOC5566298	0.695422	LOC109407766	0.0522294	LOC120424385	0.383076	CTRY008755	0.722242
Up	LOC5566322	1.05661	LOC109424732	0.137188	LOC120424467	0.190167	CTRY007510	0.139149
Up	LOC5566327	0.0739257	LOC109411290	0.0876383	LOC120422759	0.0169646	CTRY004902	0.107606
Up	LOC5566372	0.247754	LOC115262190	0.0785152	LOC120418568	0.000609508	CTRY012107	0.102199
Up	LOC5566373	0.48804	LOC115261548	0.962938	LOC120426756	0.264831	CTRY012108	1.03461
Up	LOC5566398	0.145037	LOC109429462	0.16125	LOC120416605	0.123121	CTRY005509	0.202055
Up	LOC5566409	0.00476242	LOC115259474	0.00518873	LOC120430290	0.00436814	CTRY002263	0.000901226
Up	LOC5566483	0.0756575	LOC115259414	0.259494	LOC120431816	0.34234	CTRY002277	0.571918
Up	LOC5566495	0.126312	LOC109427436	0.0833048	LOC120417032	0.0991467	CTRY000721	0.173035
Up	LOC5566514	0.123065	LOC109409620	0.169518	LOC120416306	0.0270215	CTRY012657	0
Up	LOC5566525	0.579392	LOC109413695	0.329285	LOC120413106	0.0616619	CTRY005548	0.0259553
Up	LOC5566555	0.0611538	LOC109406602	0.077945	LOC120432354	0.129317	CTRY000807	0.0227109
Up	LOC5566612	0.149042	LOC109405798	0.222488	LOC120420426	0.197074	CTRY006726	0.378875
Up	LOC5566654	0.447126	LOC109416331	0.850781	LOC120428957	0	CTRY001808	1.75775
Up	LOC5566689	0.369953	LOC109425843	0.26531	LOC120423908	0.306583	CTRY008372	0.319755
Up	LOC5566760	0.127395	LOC109428008	0.12356	LOC120421435	0.170154	CTRY012571	0.126532
Up	LOC5566771	0.0805282	LOC109416125	0.0880374	LOC120424307	0.0882771	CTRY000041	0.113014
Up	LOC5566772	60.2948	LOC109397884	18.5078	LOC120424308	67.7283	CTRY000040	63.4998
Up	LOC5566773	0.151965	LOC109397889	0.193637	LOC120424299	1.21231	CTRY000039	1.82048
Up	LOC5566843	34.0799	LOC109622065	18.3185	LOC120413809	39.645	CTRY011552	38.3021
Up	LOC5566845	0.0255439	LOC109621289	0.0246892	LOC120428111	0.0105648	CTRY011560	0.00847152
Up	LOC5566861	0.0702457	LOC115254199	0.0557646	LOC120421859	0.0311865	CTRY007114	0.239546
Up	LOC5566868	0.19212	LOC109408999	0.10788	LOC128092904	0.00700935	CTRY007121	0.00036049
Up	LOC5566893	0.0752246	LOC109426513	0.116547	LOC120417004	0.0366721	CTRY007137	0.063987
Up	LOC5566917	0.303604	LOC109421015	0.0993842	LOC120415465	0.01859	CTRY004975	0.0115357
Up	LOC5566959	30.1896	LOC109422770	12.8943	LOC120422082	33.988	CTRY000405	17.5797
Up	LOC5566976	0.595086	LOC109402491	0.256301	LOC120414546	0.0911215	CTRY004172	0.252163
Up	LOC5566977	0.456435	LOC109621383	0.50439	LOC120414545	0.605547	CTRY004171	0.171233
Up	LOC5566981	0.209005	LOC109402501	0.180465	LOC120414556	0.123527	CTRY004174	0.193583
Up	LOC5566987	0.327741	LOC109402479	0.425818	LOC120414592	0.20449	CTRY004165	0.305515
Up	LOC5566990	0.00108237	LOC109429391	0.0229217	LOC120424955	0.00761885	CTRY005360	0.0174838
Up	LOC5567028	0.0953566	LOC109402509	0.0795416	LOC120414576	0.0126981	CTRY004175	0.0522711
Up	LOC5567031	2.28455	LOC109433355	1.98073	LOC120421236	4.31989	CTRY011608	1.90501
Up	LOC5567061	0.0917848	LOC109432132	0.0555365	LOC120426732	0.0487607	CTRY002355	0.195926
Up	LOC5567070	37.9749	LOC109410072	20.1741	LOC120416902	42.1102	CTRY002558	41.1031
Up	LOC5567075	0.135837	LOC109432134	0.121108	LOC120428667	0.127387	CTRY002349	0.167448
Up	LOC5567109	0.480355	LOC109408930	0.289657	LOC120418104	0.560138	CTRY001410	0.731795
Up	LOC5567153	0.0564996	LOC109398798	0.0236629	LOC120421349	0.0336245	CTRY010955	0.0425379
Up	LOC5567163	16.8705	LOC109398833	3.85825	LOC120421718	37.3684	CTRY010964	32.9647
Up	LOC5567175	0.0849659	LOC109432316	0.117288	LOC120415353	0.0722267	CTRY007376	0.0729993
Up	LOC5567194	2.27005	LOC109432313	1.18166	LOC120415390	0.0141203	CTRY007357	2.38482
Up	LOC5567213	0.04297	LOC109397122	0.0104345	LOC120426724	0.0184884	CTRY007340	0.0290195
Up	LOC5567286	1.11138	LOC109413902	1.15817	LOC120427882	1.33533	CTRY001932	3.21179
Up	LOC5567314	0.390518	LOC109419967	0.33493	LOC120416091	0.400244	CTRY005266	0.302632
Up	LOC5567331	0.0708951	LOC115259554	0.0457863	LOC120426002	0.0429703	CTRY002304	0.0302812
Up	LOC5567368	0.1314	LOC109421953	0.124644	LOC120412731	0.115299	CTRY007516	0.181507
Up	LOC5567396	2.70776	LOC109427107	2.12025	LOC120432162	5.75315	CTRY011818	0.215573
Up	LOC5567426	0.0506548	LOC109430298	0.0818223	LOC120416917	0.046221	CTRY002584	0.010274
Up	LOC5567454	0.81091	LOC115258944	0.19358	LOC120418946	0.153698	CTRY005057	0.169971
Up	LOC5567461	0.0911354	LOC109403350	0.0595849	LOC120421565	0.0422592	CTRY008008	0.3385
Up	LOC5567473	0.00790129	LOC115267936	0.877865	LOC120416357	0.00253962	CTRY007882	0.102379
Up	LOC5567476	0.905401	LOC109406089	1.85511	LOC120429552	1.51707	CTRY007880	3.00685
Up	LOC5567501	1.3876	LOC109621796	1.13154	LOC120429321	3.19139	CTRY006472	2.25505
Up	LOC5567505	0.166901	LOC109414772	0.275915	LOC120432022	0.132873	CTRY002051	0.25
Up	LOC5567506	0.167334	LOC109414751	0.0402554	LOC120430963	0.0717188	CTRY002052	0.381759
Up	LOC5567515	0.12707	LOC109413683	0.0616376	LOC120414520	0.147196	CTRY011935	0.253064
Up	LOC5567527	0.0401559	LOC109413670	0.0640894	LOC120414061	0.0493702	CTRY012089	0.0219899
Up	LOC5567547	0.0535772	LOC109413671	0.0204128	LOC120415268	0.10707	CTRY012090	0.167808
Up	LOC5567565	0.882347	LOC109413801	1.0317	LOC120413276	1.86022	CTRY000222	3.78821
Up	LOC5567589	0.0528196	LOC109424049	0.105314	LOC120413969	0.088785	CTRY011220	0.0699351
Up	LOC5567595	0.0371252	LOC109412297	0.0546813	LOC120425389	0.0240756	CTRY002733	0.0535328
Up	LOC5567616	0.13324	LOC109412286	0.364238	LOC120425381	0.137444	CTRY002734	0.322819
Up	LOC5567634	0.0825847	LOC109418127	0.127609	LOC120426351	0.126371	CTRY008890	0.0719178
Up	LOC5567772	0.102933	LOC109430404	0.0721291	LOC120422144	0.14425	CTRY003059	0.332012
Up	LOC5567791	0.489988	LOC109621608	0.0900901	LOC120421811	0.151361	CTRY003037	0.123648
Up	LOC5567793	1.01732	LOC109400116	0.863668	LOC120421810	1.24299	CTRY003035	2.47314
Up	LOC5567811	0.102392	LOC109420434	0.0522294	LOC120423004	0.284945	CTRY008538	0.398882
Up	LOC5567820	0.0436194	LOC115262876	0.00193865	LOC120419179	0.00426656	CTRY012405	0.0239726
Up	LOC5567821	1.44756	LOC109418419	1.11484	LOC120419072	1.16812	CTRY012406	1.62203
Up	LOC5567828	0.134214	LOC109416915	0.0108906	LOC120427677	0.168427	CTRY002241	0.138789
Up	LOC5567839	2.32265	LOC109415611	1.47611	LOC120427249	1.48974	CTRY002245	4.33219
Up	LOC5567848	40.847	LOC109418058	24.5221	LOC120422997	33.1272	CTRY008542	22.1545
Up	LOC5567851	0.26767	LOC109430546	0.0152811	LOC120422291	0.00893946	CTRY009864	0.0136986
Up	LOC5567852	0.0627774	LOC134284728	0.0513171	LOC120423205	0.0273263	CTRY012755	0.0504686
Up	LOC5567855	0.0633185	LOC134289479	0.0819364	LOC120423202	0.0484559	CTRY012756	0.246395
Up	LOC5567865	0.156078	LOC109430548	0.000171057	LOC120428823	0	CTRY009863	0.00036049
Up	LOC5567898	0.622145	LOC109426003	0.250656	LOC120416339	0.378606	CTRY007900	0.174297
Up	LOC5567927	0.489122	LOC115256097	0.447714	LOC120416402	0.839191	CTRY000752	1.1159
Up	LOC5567928	0.230977	LOC109414080	0.152925	LOC120429015	0.229581	CTRY001093	0.341384
Up	LOC5567950	0.669769	LOC115264694	0.10999	LOC120420850	0.407355	CTRY006270	0.458544
Up	LOC5567964	12.9957	LOC109407316	56.6061	LOC120422404	9.96861	CTRY008226	0.12491
Up	LOC5567996	0.295811	LOC109402517	0.474113	LOC120414574	0.672694	CTRY004159	0.731615
Up	LOC5568007	0.0115813	LOC109402496	0.00467556	LOC120419461	0.0433767	CTRY003940	0.0701154
Up	LOC5568046	8.29051	LOC109421710	23.8953	LOC120416155	7.53698	CTRY012608	37.3385
Up	LOC5568059	0.0745752	LOC109421799	0.0743528	LOC120416176	0.143438	CTRY012614	0.122567
Up	LOC5568081	0.534798	LOC109404622	0.542365	LOC120417288	0.68143	CTRY003536	1.47585
Up	LOC5568090	56.5558	LOC109416572	21.6047	LOC120417310	44.2813	CTRY003547	16.9092
Up	LOC5568091	0.048923	LOC109416574	0.00273691	LOC120417311	0.00101585	CTRY003548	0.00162221
Up	LOC5568103	0.600606	LOC109418985	0.323355	LOC120427021	0.47308	CTRY008708	0.636446
Up	LOC5568156	0.0593138	LOC109398005	0.0426502	LOC120423764	0.02692	CTRY010590	0.0483057
Up	LOC5568178	0.196991	LOC109398299	0.218611	LOC120418728	0.120886	CTRY003738	0.0903028
Up	LOC5568185	0.11354	LOC109429868	0.13046	LOC120418718	0.0841121	CTRY003730	0.105443
Up	LOC5568201	0.0346358	LOC109420401	0.029935	LOC120421688	0.0236692	CTRY006839	0.0263158
Up	LOC5568223	0.0364758	LOC109420090	0.0224085	LOC120415482	0.0283421	CTRY005477	0.0111752
Up	LOC5568224	0.0359346	LOC109420089	0.050918	LOC120415484	0.151361	CTRY005476	0.131218
Up	LOC5568230	0.0947072	LOC109414301	0.183601	LOC120420683	0.0938643	CTRY004557	0.185833
Up	LOC5568233	0.107587	LOC115258575	0.106341	LOC120420642	0.0364689	CTRY004560	0.159697
Up	LOC5568237	0.0348523	LOC109407297	0.0953358	LOC120419765	0.0796424	CTRY004555	0.179524
Up	LOC5568247	0.214634	LOC109405902	0.151443	LOC120420071	0.0846201	CTRY004542	0.148342
Up	LOC5568281	0.0541184	LOC109423201	0.0109477	LOC120428991	0.0117838	CTRY001906	0.0241528
Up	LOC5568300	0.0924342	LOC109426576	0.108051	LOC120422840	0.0563795	CTRY008894	0.179344
Up	LOC5568303	0.596168	LOC109426579	0.727449	LOC120428984	0.0386022	CTRY012634	0.0809301
Up	LOC5568319	0.350038	LOC109406578	0.111301	LOC120430112	0.125152	CTRY009026	0.106164
Up	LOC5568387	0.450482	LOC109418819	0.539514	LOC120422170	0.699309	CTRY006740	0.568673
Up	LOC5568395	0.0644009	LOC109418805	0.0725852	LOC120424596	0.0823852	CTRY006760	0.143655
Up	LOC5568406	0.0950319	LOC109427507	0.0829057	LOC120422527	0	CTRY005830	0.000901226
Up	LOC5568419	0.0413465	LOC109414174	0.0384308	LOC120423195	0.0931532	CTRY012771	0.0492069
Up	LOC5568436	2.2536	LOC109409150	1.67539	LOC120417806	1.38348	CTRY008561	1.52145
Up	LOC5568451	0.0958978	LOC109403501	0.0818223	LOC120415185	0.171373	CTRY007678	0.540014
Up	LOC5568452	0.0415629	LOC109426386	0.0739537	LOC120415194	0.220134	CTRY007679	0.247296
Up	LOC5568468	0.128694	LOC109423330	0.11592	LOC120429771	0.162129	CTRY008824	0.115537
Up	LOC5568471	5.1091	LOC109423328	5.03039	LOC120429766	6.87353	CTRY008825	8.16348
Up	LOC5568481	0.808962	LOC109423339	0.221633	LOC120419503	0.216172	CTRY008812	0.24243
Up	LOC5568500	0.0355017	LOC115260118	0.0438476	LOC120413040	0.0286469	CTRY011254	0.0380317
Up	LOC5568501	0.0300898	LOC109423975	0.0366062	LOC120413045	0.034742	CTRY011249	0.0674117
Up	LOC5568522	0.117329	LOC109426522	0.0668833	LOC120416998	0.0666396	CTRY007147	0.231975
Up	LOC5568550	19.9001	LOC109405124	13.7391	LOC120416527	0.547034	CTRY009476	39.2738
Up	LOC5568556	0.275679	LOC109411230	0.190558	LOC120426571	0.0878708	CTRY012746	0.231615
Up	LOC5568574	0.344843	LOC109425837	0.369198	LOC120423698	0.18204	CTRY008402	0.421774
Up	LOC5568577	0.245589	LOC134289925	0.0527996	LOC120423701	0.045002	CTRY008400	0.0564167
Up	LOC5568583	3.26496	LOC109425830	0.968468	LOC120423682	1.13887	CTRY008396	10.2963
Up	LOC5568602	0.334019	LOC115262042	0.456095	LOC120423710	0	CTRY008379	0.225667
Up	LOC5568605	0.0645091	LOC109430167	0.0221234	LOC120432458	0.0168631	CTRY003989	0.0135184
Up	LOC5568617	0.196666	LOC109430157	0.133025	LOC128092289	0.0212312	CTRY004372	0.0928262
Up	LOC5568663	0.171772	LOC109429236	0.407971	LOC120423431	0.193417	CTRY011003	0.131399
Up	LOC5568678	0.109211	LOC109425180	0.057019	LOC120414158	0.017371	CTRY001310	0.074261
Up	LOC5568701	0.00811776	LOC109623385	0.0158513	LOC120426873	0	CTRY007054	0.287851
Up	LOC5568715	0.0510878	LOC134284212	0.0481241	LOC120415153	0.58269	CTRY007609	0.235941
Up	LOC5568716	0.335967	LOC134283989	0.179097	LOC120415152	0.754063	CTRY007610	0.310923
Up	LOC5568717	0.303713	LOC109426927	0.430494	LOC120415122	0.457538	CTRY007611	0.162221
Up	LOC5568799	0.29159	LOC109409270	0.221918	LOC120425907	0.465055	CTRY005092	0.0596611
Up	LOC5568828	1.01364	LOC109419613	1.53638	LOC120414748	1.11723	CTRY005809	2.71467
Up	LOC5568838	0.0701375	LOC115263310	0.0685939	LOC120414123	0.0332182	CTRY010229	0.113915
Up	LOC5568842	0.0482736	LOC109409255	0.0466986	LOC120425908	0.0261073	CTRY005084	0.399063
Up	LOC5568869	0.177075	LOC115254896	0.104288	LOC120416101	0.021028	CTRY005269	0.0666907
Up	LOC5568890	0.380236	LOC109404843	0.246037	LOC120420805	0.852601	CTRY005147	2.32787
Up	LOC5568912	0.0393982	LOC109414744	0.039001	LOC120422019	0.0453068	CTRY002043	0.063266
Up	LOC5568916	0.667064	LOC115253904	0.108564	LOC120424342	0.124543	CTRY002447	0.626352
Up	LOC5568961	0.0642927	LOC109621477	0.0324438	LOC120421558	0.0254978	CTRY007994	0.133021
Up	LOC5568987	0.236173	LOC109432824	0.159596	LOC120424845	0.0895977	CTRY009581	0.0702956
Up	LOC5569056	0.094166	LOC109408281	0.139298	LOC120432520	0.0645063	CTRY002418	0.0149603
Up	LOC5569074	0.856911	LOC109421664	1.27848	LOC120413874	1.11215	CTRY003805	1.78461
Up	LOC5569075	0.209763	LOC109421661	0.0462424	LOC120413872	0.0431735	CTRY003807	0.0378515
Up	LOC5569090	0.0474077	LOC109400374	0.0168776	LOC120413776	0.0259041	CTRY011518	0.127253
Up	LOC5569091	0.0950319	LOC109400371	0.0636903	LOC120413768	0.277225	CTRY011515	0.255588
Up	LOC5569128	0.0714363	LOC109414694	0.0563348	LOC120419281	0.0509955	CTRY001384	0.111752
Up	LOC5569192	0.0335534	LOC109425148	0.0215532	LOC120429041	0.0298659	CTRY005531	0.111211
Up	LOC5569203	0.0430783	LOC109397902	0.0686509	LOC120422456	0.0717188	CTRY001169	0.0465032
Up	LOC5569222	2.19602	LOC109417729	2.74484	LOC120431628	1.52997	CTRY002942	0.802632
Up	LOC5569240	0.254681	LOC109417893	0.346049	LOC120432484	0.217493	CTRY002114	0.380497
Up	LOC5569309	0.324169	LOC109414312	0.130517	LOC120428384	0.0338277	CTRY005634	0.118241
Up	LOC5569310	2.66923	LOC115258685	1.82039	LOC120428306	1.55861	CTRY005623	1.17069
Up	LOC5569333	0.132807	LOC109407248	0.104915	LOC120428341	0.0566843	CTRY005632	0.0569575
Up	LOC5569339	0.157918	LOC109407255	0.0543391	LOC120428257	0.0577001	CTRY005625	0.186013
Up	LOC5569445	0.0623444	LOC109420642	0.0953358	LOC120416875	0.125965	CTRY005516	0.405552
Up	LOC5569463	0.124472	LOC109430292	0.0891208	LOC120425563	0.0166599	CTRY002231	0.211067
Up	LOC5569470	0.0344193	LOC109415631	0.0294218	LOC120432221	0.058208	CTRY000191	0.0697549
Up	LOC5569472	0.0586644	LOC109431144	0.0544532	LOC120432279	0.0460179	CTRY000190	0.108327
Up	LOC5569473	0.0011906	LOC109415715	0.00171057	LOC120429964	0.000406339	CTRY000196	0.00306417
Up	LOC5569501	0.152181	LOC115258143	0.215247	LOC120428086	0.0361642	CTRY005496	0.0492069
Up	LOC5569517	0.0738175	LOC109404604	0.0220664	LOC120419045	0.170358	CTRY003513	0.317231
Up	LOC5569529	36.9492	LOC109411702	2.99099	LOC120419037	23.9277	CTRY003508	19.6532
Up	LOC5569531	45.1292	LOC109403451	20.8564	LOC120417554	43.3362	CTRY006434	37.2417
Up	LOC5569540	0.334344	LOC109433195	0.488653	LOC120425797	0.559325	CTRY006515	0.0205479
Up	LOC5569547	0.861457	LOC109433182	0.45199	LOC120417564	0.732324	CTRY006432	0.934932
Up	LOC5569566	4.63567	LOC109422035	1.01437	LOC120412599	5.72928	CTRY000877	9.94449
Up	LOC5569582	40.6456	LOC109408226	15.2406	LOC120423615	41.3027	CTRY009888	42.8412
Up	LOC5569584	0.032904	LOC109419419	0.0407686	LOC120426204	0.0110727	CTRY010004	0.0452415
Up	LOC5569604	0.556337	LOC109416078	0.350097	LOC120418532	0.215563	CTRY010030	0.204037
Up	LOC5569635	0.177833	LOC109408409	0.00199567	LOC120414816	0	CTRY011421	0
Up	LOC5569671	0.0485983	LOC109405308	0.0624359	LOC120419338	0.0314913	CTRY011106	0.0975126
Up	LOC5569704	0.0340946	LOC109429882	0.0461854	LOC120420495	0.0864486	CTRY003891	0.017664
Up	LOC5569708	0.0299816	LOC109429871	0.0543962	LOC120423977	0.0265136	CTRY003761	0.0447008
Up	LOC5569713	0.0573655	LOC109429955	0.0367773	LOC120423985	0.029358	CTRY003759	0.135184
Up	LOC5569739	0.161381	LOC109433481	0.0503478	LOC120425093	0.0208249	CTRY008222	0.444485
Up	LOC5569740	0.125771	LOC109410643	0.20926	LOC120427505	0.110931	CTRY008223	0.403028
Up	LOC5569750	1.06722	LOC109404691	0.196488	LOC120418133	0.675335	CTRY001427	1.16096
Up	LOC5569754	0.055742	LOC109411839	0.0565059	LOC120429838	0.0859407	CTRY003444	0.0791276
Up	LOC5569755	0.125014	LOC109410346	0.062949	LOC120413364	0.00832995	CTRY001520	0.0142394
Up	LOC5569771	0.131724	LOC109420449	0.251625	LOC120429070	0.252844	CTRY003452	0.256309
Up	LOC5569780	1.46206	LOC109424680	0.538602	LOC120415100	0.286469	CTRY007605	0.336698
Up	LOC5569822	0.246672	LOC109429650	0.237541	LOC120413826	0	CTRY012378	0.192322
Up	LOC5569850	0.0876718	LOC109416842	0.00125442	LOC120423125	0.0142219	CTRY005052	0.0428983
Up	LOC5569925	2.10304	LOC109421982	0.674421	LOC120421420	0.930719	CTRY000695	0.182228
Up	LOC5569932	0.174045	LOC109427503	0.0589007	LOC120422528	0.627895	CTRY000019	0.327325
Up	LOC5569945	0.13995	LOC109408449	0.141749	LOC120431718	0.180821	CTRY011451	0.489546
Up	LOC5570007	0.630263	LOC134291439	0.695746	LOC120419573	0.642523	CTRY006145	1.39438
Up	LOC5570017	0.780604	LOC134291428	0.527654	LOC120419562	0.212007	CTRY006153	0.781363
Up	LOC5570050	1.68243	LOC109399541	0.293363	LOC120416623	0.618346	CTRY006175	0.402487
Up	LOC5570065	0.0663492	LOC109429502	0.0562778	LOC120423913	0.0567859	CTRY012338	0.0549748
Up	LOC5570070	0.196017	LOC109403034	0.108678	LOC120423588	0.0589191	CTRY012343	0.147981
Up	LOC5570108	25.5974	LOC109401825	17.144	LOC120413352	35.9469	CTRY001528	26.1435
Up	LOC5570139	35.5495	LOC134284018	19.863	LOC120416159	40.1054	CTRY012633	49.2017
Up	LOC5570148	0.280117	LOC115267959	0.33071	LOC120420932	0.121902	CTRY011674	0.177541
Up	LOC5570154	0.0360429	LOC109414557	0.0522294	LOC120420947	0.085128	CTRY011679	0.0675919
Up	LOC5570159	0.48187	LOC109414508	0.445262	LOC120420944	0.561459	CTRY011685	0.802451
Up	LOC5570164	0.0467583	LOC109427036	0	LOC120422964	0.077306	CTRY007637	0.262617
Up	LOC5570169	0.203377	LOC109399730	0.0713308	LOC120422257	0.0720236	CTRY011845	0.171413
Up	LOC5570206	0.0427535	LOC109406105	0.0682518	LOC120414324	0.1346	CTRY012699	0.189077
Up	LOC5570211	0.353826	LOC115254457	0.254419	LOC120414356	0.0714141	CTRY012678	0
Up	LOC5570243	21.9835	LOC109405848	10.8528	LOC120425212	20.4139	CTRY012439	20.752
Up	LOC5570244	47.2895	LOC109405852	23.1299	LOC120425218	32.3978	CTRY012440	53.7435
Up	LOC5570277	0.331746	LOC109409731	0.301346	LOC120428398	0	CTRY008492	0.85328
Up	LOC5570318	1.12025	LOC115253927	1.00091	LOC120414302	0.368346	CTRY012677	1.18511
Up	LOC5570370	0.243533	LOC109420412	0.167465	LOC120426406	0.180008	CTRY006847	0.850757
Up	LOC5570423	0.338673	LOC109420022	0.0754362	LOC120414085	0.00782202	CTRY004957	0.105624
Up	LOC5570432	30.7271	LOC109433111	11.1854	LOC120414102	20.4024	CTRY005078	24.9513
Up	LOC5570455	0.406429	LOC109402076	0.453073	LOC120425894	0.918021	CTRY001218	1.03569
Up	LOC5570464	0.0267345	LOC109622842	0.0068993	LOC120422918	0	CTRY009142	0.0189257
Up	LOC5570505	1.08865	LOC109406436	0.540141	LOC120425590	1.66965	CTRY009179	0.674297
Up	LOC5570515	0.0764152	LOC109418076	0.0484662	LOC120427572	0.00711093	CTRY009170	0.0425379
Up	LOC5570528	0.0585561	LOC109428437	0.184856	LOC120412456	0.0101585	CTRY000814	0.109048
Up	LOC5570552	0.0921095	LOC109419246	0.133253	LOC120413669	0.121699	CTRY011968	0.303172
Up	LOC5570559	0.0488148	LOC109419256	0.0547953	LOC120413663	0.0717188	CTRY011962	0.229993
Up	LOC5570605	0.0673233	LOC109397236	0.0681948	LOC120417843	0.219321	CTRY002984	0.163122
Up	LOC5570613	0.0586644	LOC109406368	0.309956	LOC120424932	0.693925	CTRY001811	0.855624
Up	LOC5570661	0.179024	LOC109622524	0.731041	LOC120417834	0.546526	CTRY008565	0.305335
Up	LOC5570663	0.354476	LOC109409075	0.566883	LOC120417835	0.110829	CTRY008564	1.46774
Up	LOC5570671	0.104881	LOC109622521	0.0757213	LOC120417822	0.101077	CTRY008569	0.140952
Up	LOC5570675	45.4731	LOC109408924	20.5847	LOC120417799	44.8288	CTRY008925	40.7792
Up	LOC5570686	0.420284	LOC109433584	0.306991	LOC120415720	0.539313	CTRY004413	0.825703
Up	LOC5570792	0.147419	LOC109424164	0.142719	LOC120414481	0	CTRY009988	0.104542
Up	LOC5570804	0.0697045	LOC109432015	0.065971	LOC120424353	0.112454	CTRY006400	0.0780461
Up	LOC5570807	0.0425371	LOC109431307	0.0260007	LOC120424960	0.0762901	CTRY006398	0.0355083
Up	LOC5570810	0.480571	LOC109431293	0.215418	LOC120424707	0.227448	CTRY006396	0.475487
Up	LOC5570812	0.0636433	LOC109431311	0.0890067	LOC120425213	0.0977245	CTRY006394	0.0798486
Up	LOC5570826	0.397013	LOC109419940	0.541054	LOC120427965	0.569992	CTRY004800	2.61175
Up	LOC5570852	0.092759	LOC109429974	0.138157	LOC120412692	0.053332	CTRY003669	0.182048
Up	LOC5570893	0.30512	LOC109401374	0.12242	LOC120413530	0.247257	CTRY005042	0.408075
Up	LOC5570910	0.0102825	LOC109432868	0.0157373	LOC120422975	0.0496749	CTRY005465	0.00793078
Up	LOC5570915	0.0622362	LOC109412374	0.0620367	LOC120422985	0.0331166	CTRY005641	0.0495674
Up	LOC5570916	0.377314	LOC109401408	0.971262	LOC120422983	0.325274	CTRY005642	0.921774
Up	LOC5570922	0.367464	LOC109412368	0.364067	LOC120422970	0.625457	CTRY005647	1.76622
Up	LOC5570950	0.0383158	LOC109409700	0.0563918	LOC120428690	0.0518082	CTRY008469	0.075703
Up	LOC5570958	0.167442	LOC109406841	0.251454	LOC120419384	0.351991	CTRY005168	0.297044
Up	LOC5570978	0.310856	LOC109425564	0.0915726	LOC120428225	0.249594	CTRY012249	0.184751
Up	LOC5570983	0.0560667	LOC109411159	0.0555365	LOC120427916	0.0178789	CTRY012253	0.0322639
Up	LOC5570990	0.0640762	LOC109404496	0.0563918	LOC120418271	0.0673507	CTRY010834	0.0706561
Up	LOC5570996	2.05055	LOC109418544	0.850895	LOC120414919	0.489029	CTRY006624	1.70584
Up	LOC5571005	0.0373417	LOC109418534	0.029992	LOC120414893	0.069484	CTRY006612	0.0310022
Up	LOC5571006	0.544539	LOC109413090	0.635762	LOC120414905	0.411113	CTRY006611	0.765321
Up	LOC5571008	0.0444853	LOC109418478	0.0481811	LOC120414903	0.051605	CTRY006610	0.0524513
Up	LOC5571036	0.0608291	LOC109428999	0.0519444	LOC120419312	0.137241	CTRY007428	0.25
Up	LOC5571039	6.9566	LOC115263355	1.38893	LOC120414477	0.0828931	CTRY009957	0.0430786
Up	LOC5571053	8.2063	LOC109426636	0.121165	LOC120420702	0.512495	CTRY009283	0.394016
Up	LOC5571057	0.0418876	LOC109401041	0.035808	LOC120414805	0.0666396	CTRY011429	0.175559
Up	LOC5571082	0.0843165	LOC109419384	0.10902	LOC120414808	0.109	CTRY011443	0.0690339
Up	LOC5571124	0.0920013	LOC109424501	0.152298	LOC120417572	0.0423608	CTRY006445	0.157354
Up	LOC5571137	0.0933001	LOC109428232	0.0975596	LOC120414659	0.650244	CTRY005948	0.127253
Up	LOC5571140	0.253382	LOC109427913	0.168092	LOC120414656	0.167716	CTRY005946	0.302091
Up	LOC5571144	0.0832341	LOC109427905	0.0941955	LOC120414657	0.0300691	CTRY005942	0.0436193
Up	LOC5571151	0.0702457	LOC109428219	1.06797	LOC120414678	0.00761885	CTRY005940	0.205299
Up	LOC5571173	1.07328	LOC109406496	1.19061	LOC120425282	1.01036	CTRY006777	1.11337
Up	LOC5571188	0.609698	LOC109403230	0.827232	LOC120412382	0.223385	CTRY009508	0.144557
Up	LOC5571189	0.172746	LOC109403232	0.174421	LOC120412383	0.131857	CTRY009509	0.150505
Up	LOC5571197	0.11906	LOC109402743	0.119227	LOC120412390	0.070703	CTRY009514	0.112473
Up	LOC5571208	0.748133	LOC109432273	1.20173	LOC120418156	0.317249	CTRY007768	0.226929
Up	LOC5571215	0.109211	LOC115258651	0.00524575	LOC120420810	0.00223486	CTRY005148	0.0793079
Up	LOC5571230	0.232168	LOC109401451	0.237142	LOC120417668	0.172085	CTRY012472	0.265141
Up	LOC5571265	0.354043	LOC109423371	0.429011	LOC120419737	0.385412	CTRY008674	1.99063
Up	LOC5571299	0.0506548	LOC109622503	0.0321587	LOC120424425	0.0171678	CTRY008915	0.0241528
Up	LOC5571304	2.50005	LOC109410132	1.03849	LOC120422058	1.14506	CTRY000389	9.13987
Up	LOC5571319	0.146228	LOC134287600	0.0222944	LOC120419469	0.0497765	CTRY003935	0.0113554
Up	LOC5571381	0.113432	LOC109428444	0.0724142	LOC120432290	0.0683665	CTRY000165	0.0207282
Up	LOC5571386	0.228596	LOC109428446	0.152526	LOC120432291	0.184579	CTRY000166	0.178262
Up	LOC5571409	0.209546	LOC115263169	0.276029	LOC120417619	0.203474	CTRY009929	0.391312
Up	LOC5571429	0.942526	LOC134287924	1.83818	LOC120413618	1.19931	CTRY005213	2.23288
Up	LOC5571437	0.13811	LOC109406399	0.18668	LOC120422124	0.544291	CTRY003380	0.0859769
Up	LOC5571447	0.323953	LOC109411457	0.429867	LOC120427602	0.274076	CTRY008474	0.138068
Up	LOC5571450	0.752571	LOC109409719	1.14933	LOC120427611	0.833503	CTRY008478	1.75144
Up	LOC5571452	0.0552008	LOC109409721	0.0349527	LOC120427620	0.0554653	CTRY008480	0.0623648
Up	LOC5571453	1.35935	LOC109411467	3.28892	LOC120427608	1.43377	CTRY008481	10.1592
Up	LOC5571454	0.116138	LOC109408405	0.143061	LOC120414794	0.135108	CTRY011415	0.150505
Up	LOC5571463	0.0396147	LOC109408400	0.0383738	LOC120414810	0.0123933	CTRY011409	0.0304614
Up	LOC5571509	0.088213	LOC109431403	0.0775459	LOC120418091	0	CTRY001699	0.064708
Up	LOC5571563	0.038857	LOC109414872	0.0215532	LOC120428829	0.0342341	CTRY009330	0.0167628
Up	LOC5571564	41.9013	LOC115260570	17.0197	LOC120425318	30.8701	CTRY000512	20.6738
Up	LOC5571578	0.0576902	LOC109397824	0.0621508	LOC120422065	0.0535351	CTRY000369	0.0155011
Up	LOC5571615	0.072194	LOC109621453	0.0711598	LOC120422728	0.125457	CTRY010867	0.0506489
Up	LOC5571771	0.0625609	LOC109409482	0.14882	LOC120424201	0.182954	CTRY008838	0.137527
Up	LOC5571775	0.159974	LOC109622423	0.216273	LOC120424185	0.501219	CTRY008843	0.0273973
Up	LOC5571787	0.109752	LOC109430368	0.0864979	LOC120416008	0.00954896	CTRY002544	0.00252343
Up	LOC5571799	0.180647	LOC115269374	0.0392291	LOC120420182	0.00223486	CTRY000580	0.00288392
Up	LOC5571803	4.53144	LOC109427544	3.32951	LOC120420175	0	CTRY000579	0.000180245
Up	LOC5571810	0.144713	LOC109426651	0.0595849	LOC120421340	0.0784234	CTRY010461	0.102559
Up	LOC5571884	0.0689469	LOC109623253	5.7019e-05	LOC120426856	0	CTRY007039	0.0944485
Up	LOC5571886	0.166901	LOC109431646	0.204983	LOC120420057	0.132263	CTRY010638	0.143115
Up	LOC5571894	0.0371252	LOC109426359	0.0372334	LOC120414310	0.0148314	CTRY012686	0.0205479
Up	LOC5571922	0.171014	LOC109410731	0.047896	LOC120420338	0.0318976	CTRY007796	0.0856164
Up	LOC5571932	0.674424	LOC109405279	0.726936	LOC120423256	0.450427	CTRY006663	2.27776
Up	LOC5571934	0.0714363	LOC109405281	0.108507	LOC120423255	0.149736	CTRY006662	0.026496
Up	LOC5571955	0.389111	LOC109405894	0.241191	LOC120420360	0.317859	CTRY004537	0.072819
Up	LOC5571976	1.46011	LOC109401911	0.812863	LOC120422443	4.76046	CTRY001176	3.2655
Up	LOC5571997	0.735794	LOC109397716	0.143745	LOC120432486	0.0331166	CTRY000907	0.395278
Up	LOC5572000	0.0547678	LOC115254007	0.0349527	LOC120432371	0.0664364	CTRY000903	0.0861572
Up	LOC5572017	0.131941	LOC109424953	0.295359	LOC120432251	0.475721	CTRY000143	1.10328
Up	LOC5572032	0.061695	LOC109413249	0.0996693	LOC120415081	0.026412	CTRY000104	0.113554
Up	LOC5572053	0.107263	LOC109402269	0.215988	LOC120429789	0.110118	CTRY003956	0.15411
Up	LOC5572071	0.775409	LOC109402400	0.0409397	LOC120432440	0.929703	CTRY003970	1.14654
Up	LOC5572090	25.9478	LOC109399102	11.68	LOC120412342	26.7432	CTRY008065	26.4223
Up	LOC5572116	0.0793376	LOC134284447	0.0248033	LOC120429176	0.0553637	CTRY001374	0.0611031
Up	LOC5572192	0.122632	LOC134287205	0.127038	LOC120430388	0.0440878	CTRY010643	0.221341
Up	LOC5572269	0.0580149	LOC109431638	0.0615236	LOC120419523	0.216274	CTRY010275	0.116619
Up	LOC5572288	0.0519537	LOC109431654	0.0248603	LOC120423604	0.0136124	CTRY009891	0.0241528
Up	LOC5572316	0.279684	LOC109422621	0.298837	LOC120417902	0.192808	CTRY011159	0.44845
Up	LOC5572340	0.110185	LOC109420214	0.0398563	LOC120420578	0.0199106	CTRY009009	0.101658
Up	LOC5572365	33.314	LOC109431049	13.4311	LOC120427769	18.9555	CTRY006987	22.6822
Up	LOC5572372	16.7009	LOC115266806	40.9896	LOC120422041	4.02316	CTRY004385	12.7947
Up	LOC5572390	0.0756575	LOC109421972	0.122933	LOC120412596	0.192605	CTRY000876	0.105984
Up	LOC5572446	0.0339864	LOC109407379	0.0756643	LOC120415983	0.0247867	CTRY004700	0.0405552
Up	LOC5572460	0.0668904	LOC115255819	0.0217243	LOC120416791	0.00660301	CTRY004643	0.00108147
Up	LOC5572478	0.811343	LOC109406732	1.26354	LOC120426655	0.444027	CTRY004200	1.77974
Up	LOC5572501	0.0994696	LOC109420867	0.157658	LOC120415777	0.0697887	CTRY009636	0.140591
Up	LOC5572507	1.26496	LOC109418229	0.0883225	LOC120423949	0.151056	CTRY012581	0.159156
Up	LOC5572519	0.970018	LOC109418213	0.00946516	LOC120423936	0.139171	CTRY012595	0
Up	LOC5572532	0.423747	LOC109431669	0.419033	LOC120416048	0.213836	CTRY009900	0.155371
Up	LOC5572534	4.14796	LOC109431657	1.61786	LOC120416051	3.67483	CTRY009904	3.53821
Up	LOC5572599	0.0714363	LOC109399952	0.0987	LOC120430221	0.114892	CTRY002219	0.0780461
Up	LOC5572600	0.116355	LOC109399954	0.248375	LOC120430222	0.183665	CTRY002218	0.205299
Up	LOC5572611	0.0439442	LOC109412875	0.0324438	LOC120417079	0.0820804	CTRY003430	0.0209084
Up	LOC5572624	0.0570408	LOC109429368	0.0836469	LOC120421950	0.0146282	CTRY004693	0.0230714
Up	LOC5572646	0.129127	LOC109420179	0.0997833	LOC120424092	0.046221	CTRY005575	0.235941
Up	LOC5572650	1.10748	LOC109420234	1.20937	LOC120420614	0	CTRY005185	2.89203
Up	LOC5572655	0.565213	LOC109401725	0.000399133	LOC120420612	0.000101585	CTRY005192	0
Up	LOC5572725	14.9737	LOC109621625	4.96185	LOC120430495	10.2444	CTRY001917	7.18151
Up	LOC5572732	0.161165	LOC109400092	0.10252	LOC120428997	0.0779155	CTRY001912	0.120584
Up	LOC5572744	0.142981	LOC109426751	0.15857	LOC120421332	0.121597	CTRY010464	0.432048
Up	LOC5572748	1.43533	LOC109407927	1.79519	LOC120424834	0	CTRY009576	1.04146
Up	LOC5572750	0.0457842	LOC109407943	0.00353518	LOC120424830	0.1346	CTRY009577	0.468277
Up	LOC5572751	0.0507631	LOC109407928	0.100696	LOC120424831	0.0193011	CTRY009579	3.27217
Up	LOC5572753	0.933543	LOC109407929	0.401129	LOC120424863	0.615197	CTRY009582	0.200973
Up	LOC5572759	2.42526	LOC109407986	2.00319	LOC120420123	2.11733	CTRY009423	0.0803893
Up	LOC5572772	0.0408053	LOC115265574	0.0440187	LOC120419018	0.040126	CTRY004141	0.0683129
Up	LOC5572777	0.0878883	LOC109622748	0.0890067	LOC120425473	0.0486591	CTRY001866	0.114275
Up	LOC5572836	0.387271	LOC109425452	0.417836	LOC120425772	0.408472	CTRY012669	1.19917
Up	LOC5572843	1.21279	LOC109425462	0.665013	LOC120425766	0.892625	CTRY012660	1.6287
Up	LOC5572857	1.12382	LOC115254229	0.023948	LOC120421375	0.0211296	CTRY006125	0.0695746
Up	LOC5572931	6.77043	LOC109432900	1.71747	LOC120431162	6.71638	CTRY005300	14.1476
Up	LOC5572942	0.0359346	LOC115255254	0.0249173	LOC120418641	0.000507924	CTRY004864	0.00739005
Up	LOC5572956	0.0334452	LOC109422720	0.0724712	LOC120412987	0.0660301	CTRY011324	0.06615
Up	LOC5572966	0.127287	LOC115266146	0.199852	LOC120412991	0.163958	CTRY011330	0.24243
Up	LOC5572967	0.433272	LOC109422712	0.409226	LOC120412992	0.535047	CTRY011331	0.385544
Up	LOC5572968	48.8323	LOC109412318	25.9635	LOC120412941	39.3109	CTRY011332	23.1022
Up	LOC5572991	0.0908107	LOC115264641	0.0973885	LOC120425152	0.0708045	CTRY006404	0.063266
Up	LOC5572998	0.075874	LOC109405099	0.186452	LOC120424112	0.111134	CTRY006106	2.17862
Up	LOC5573000	0.0508713	LOC109428653	0.0562778	LOC120418659	0.0457131	CTRY010521	0.0856164
Up	LOC5573002	0.139301	LOC109422480	0.0620937	LOC120418677	0.121699	CTRY010520	0.16204
Up	LOC5573004	0.0933001	LOC109428689	0.116775	LOC120418674	0.0236692	CTRY010523	0.0362293
Up	LOC5573005	0.028791	LOC109422483	0.0788573	LOC120418673	0.0787282	CTRY010524	0.128335
Up	LOC5573011	0.0601797	LOC109428639	0.0360931	LOC120418651	0.0469321	CTRY010528	0.00865177
Up	LOC5573038	0.217015	LOC134284899	0.0445319	LOC120414164	0.15451	CTRY001466	0.0811103
Up	LOC5573048	0.0611538	LOC134292064	0.0555936	LOC120425713	0.0483543	CTRY011132	0.0710166
Up	LOC5573056	0.0871306	LOC109411499	0.0374615	LOC120423556	0.162637	CTRY002655	1.24567
Up	LOC5573067	0.0832341	LOC109418575	0.210514	LOC120414923	0.201747	CTRY006645	0.218637
Up	LOC5573096	0.113757	LOC109398534	0.0811951	LOC120425342	0.0947785	CTRY004489	0.473684
Up	LOC5573119	0.149367	LOC134287581	0.0205269	LOC120431920	0.0860423	CTRY004020	0.0484859
Up	LOC5573211	8.37677	LOC109407505	4.8359	LOC120428267	10.4473	CTRY008420	9.58706
Up	LOC5573217	42.8098	LOC109425778	15.6671	LOC120428260	21.9018	CTRY008409	16.8167
Up	LOC5573218	0.118519	LOC109425768	0.0815372	LOC120428247	0.278748	CTRY008415	0.130317
Up	LOC5573219	0.100336	LOC109407511	0.0811381	LOC120428256	0.0400244	CTRY008414	0.0627253
Up	LOC5573228	0.0866977	LOC109407514	0.0376326	LOC120428266	0.00965055	CTRY008411	0.0519106
Up	LOC5573287	0.344734	LOC109408691	0.0520584	LOC120430132	0.00345388	CTRY010173	0.171774
Up	LOC5573290	0.168849	LOC109403058	0.095678	LOC120430133	0.0321008	CTRY010175	0.151586
Up	LOC5573319	0.406105	LOC115253499	0.341772	LOC120422563	0.312779	CTRY002858	1.17826
Up	LOC5573370	0.443879	LOC109429778	0.221519	LOC120425999	0.31024	CTRY002312	0.260094
Up	LOC5573371	0.0929754	LOC115261525	0.1511	LOC120426250	0.0858391	CTRY002092	0.074261
Up	LOC5573374	3.28639	LOC109430715	0.753279	LOC120425993	0.568366	CTRY002310	0.376712
Up	LOC5573377	0.0851824	LOC109430733	0.137758	LOC120431604	0.153901	CTRY002315	0.091925
Up	LOC5573385	0.0764152	LOC109420020	0.00621508	LOC120415973	0.00792361	CTRY004721	0.0185652
Up	LOC5573395	0.156619	LOC109417751	0.138328	LOC120415995	0.119159	CTRY004717	0.204758
Up	LOC5573409	0.250785	LOC109401907	0.0741818	LOC120420231	0.0380943	CTRY000608	0.318133
Up	LOC5573413	35.3241	LOC109401923	22.2056	LOC120420232	35.1012	CTRY000605	36.1682
Up	LOC5573418	2.59357	LOC109404924	1.24917	LOC120418020	1.61499	CTRY009726	0.188176
Up	LOC5573431	0.166793	LOC115264142	0.00279393	LOC120424615	0.0813694	CTRY003139	0.415105
Up	LOC5573434	0.0836671	LOC115261758	0.0192154	LOC120424681	0	CTRY003136	0.312906
Up	LOC5573465	0.0755493	LOC109426690	0.0872962	LOC120423180	0.125356	CTRY010469	0.0904831
Up	LOC5573469	0.200671	LOC134285650	0.00786863	LOC120426702	0.340614	CTRY002017	0.524333
Up	LOC5573470	0.0266263	LOC109424714	0.0143688	LOC120415851	0.0759854	CTRY007847	0.0129776
Up	LOC5573478	0.051629	LOC109423322	0.110104	LOC120419727	0.0217391	CTRY008649	0.133021
Up	LOC5573490	0.0245698	LOC109418348	0.000456152	LOC120427141	0	CTRY005116	0.00378515
Up	LOC5573492	0.406213	LOC109622835	0.383624	LOC120418399	0.245022	CTRY005109	0.281002
Up	LOC5573494	0.313021	LOC109622837	0.209089	LOC120418414	0.296424	CTRY005110	0.246215
Up	LOC5573533	0.113649	LOC109404191	0.0497776	LOC120418350	0.222471	CTRY002810	0.511536
Up	LOC5573534	0.129776	LOC109413324	0.050861	LOC120418337	0.193824	CTRY002813	0.43385
Up	LOC5573538	0.459141	LOC109404182	1.64386	LOC120428276	1.0704	CTRY002807	1.43565
Up	LOC5573540	0.126096	LOC109413322	0.0887216	LOC120428274	0.0899025	CTRY002809	0.188897
Up	LOC5573549	0.134105	LOC109410905	0.158	LOC120417059	0.0969118	CTRY012261	0.0764239
Up	LOC5573577	0.0421041	LOC134290039	0.0220094	LOC120421310	0.0186916	CTRY010913	0.0407354
Up	LOC5573578	0.175235	LOC109429118	0.0428783	LOC120421179	0.0381959	CTRY010914	0.0335256
Up	LOC5573581	0.450806	LOC109429124	0.408199	LOC120421774	0.193824	CTRY010919	0.388969
Up	LOC5573583	3.18184	LOC109429125	1.22414	LOC120421698	0.407355	CTRY010920	8.46215
Up	LOC5573614	0.0634268	LOC109402650	0.0279393	LOC120419701	0.0113775	CTRY000803	0.0207282
Up	LOC5573673	0.797922	LOC109401345	0.80374	LOC120412918	1.48029	CTRY009837	2.72044
Up	LOC5573731	0.0902695	LOC109422314	0.107823	LOC120424463	0.0581065	CTRY006338	0.0935472
Up	LOC5573732	4.69228	LOC109422315	6.60531	LOC120424171	7.88348	CTRY006339	10.5436
Up	LOC5573751	3.00487	LOC109424463	2.54921	LOC120415314	3.63643	CTRY006311	1.9571
Up	LOC5573763	10.3143	LOC115265304	3.4724	LOC120428572	12.2448	CTRY010361	10.6763
Up	LOC5573776	0.26951	LOC109402593	0.370624	LOC120424879	0.0212312	CTRY010370	0.132841
Up	LOC5573778	0.269077	LOC109416473	0.264968	LOC120424872	0.691487	CTRY010369	0.331471
Up	LOC5573790	0.539236	LOC109428891	0.407401	LOC120415092	0.286063	CTRY007448	0.528839
Up	LOC5573827	38.4629	LOC109621229	18.7144	LOC120421466	46.2436	CTRY006684	40.1546
Up	LOC5573830	7.53328	LOC109401290	2.88454	LOC120416219	9.06776	CTRY006565	12.0707
Up	LOC5573850	0.0491395	LOC109419533	0.0461854	LOC120427994	0.0868549	CTRY005753	0.106345
Up	LOC5573858	4.44074	LOC115258746	1.07156	LOC120428547	0.219321	CTRY005759	1.03515
Up	LOC5573870	0.0687304	LOC109432157	0.0796556	LOC120418742	0.0670459	CTRY002143	0.425378
Up	LOC5573872	7.46607	LOC115263730	3.9813	LOC120418758	4.73933	CTRY002142	0.347513
Up	LOC5573879	3.46563	LOC109422594	2.65726	LOC120417872	4.89151	CTRY011140	7.469
Up	LOC5573939	0.119385	LOC109421315	0.112213	LOC120426886	0.182141	CTRY004343	0.0246936
Up	LOC5573942	0.203269	LOC109421313	0.125499	LOC120426896	0.162231	CTRY004345	0.181867
Up	LOC5573963	1.2076	LOC109401480	0.717471	LOC120426320	2.29917	CTRY012181	0.827505
Up	LOC5573966	0.0344193	LOC109410458	0.0392291	LOC120426323	0.0278342	CTRY012179	0.0457823
Up	LOC5573974	29.8756	LOC109401487	28.3222	LOC120426083	35.3217	CTRY011942	48.0364
Up	LOC5573990	0.809936	LOC109425667	0.906945	LOC120413438	1.01249	CTRY009686	2.32895
Up	LOC5574023	0.0626691	LOC109431821	0.290398	LOC120416288	0	CTRY006957	0
Up	LOC5574043	0.196775	LOC109431649	0.189987	LOC120413418	0.121495	CTRY010667	0.0281182
Up	LOC5574167	4.07847	LOC115261492	3.22289	LOC120418235	4.34854	CTRY010827	7.97224
Up	LOC5574188	0.0949237	LOC115267928	0.0818794	LOC120418571	0	CTRY008183	0.157534
Up	LOC5574223	0.58134	LOC109410908	0.326947	LOC120427917	0.0213328	CTRY012257	0.194845
Up	LOC5574289	0.170148	LOC109419691	0.0561067	LOC120426287	0.0172694	CTRY008573	0.0182048
Up	LOC5574338	1.46217	LOC109398039	0.882427	LOC120430340	1.28992	CTRY010575	2.49585
Up	LOC5574353	0.386081	LOC109398113	2.07703	LOC120422276	0.692808	CTRY010609	1.2464
Up	LOC5574368	0.215067	LOC109414420	0.272551	LOC120425442	0.270215	CTRY005976	0.852199
Up	LOC5574387	0.0997944	LOC134288032	0.216843	LOC120426020	0	CTRY006006	0.190339
Up	LOC5574394	0.0427535	LOC109415977	0.0679097	LOC120425599	0.119768	CTRY012143	0.182588
Up	LOC5574404	1.94956	LOC109419212	2.29638	LOC120425614	2.33645	CTRY012141	4.64762
Up	LOC5574409	0.0592055	LOC109416013	0.0372334	LOC120431565	0.063592	CTRY012135	0.0405552
Up	LOC5574484	0.406321	LOC109419105	0.703501	LOC120418969	0.70449	CTRY005065	1.11193
Up	LOC5574485	34.0149	LOC109409318	20.2739	LOC120414767	38.446	CTRY005785	36.5335
Up	LOC5574499	0.0782552	LOC109409311	0.0529707	LOC120427661	0.088074	CTRY005776	0.0998558
Up	LOC5574509	0.040697	LOC109412520	0.0314745	LOC120413229	0.0489638	CTRY009762	0.0454218
Up	LOC5574515	7.22243	LOC109401458	3.71376	LOC120426327	7.79165	CTRY012190	9.87275
Up	LOC5574522	0.0634268	LOC109397826	0.0962482	LOC120421070	0.204795	CTRY000344	0.284607
Up	LOC5574525	0.158892	LOC109397825	0.092656	LOC120421080	0.328322	CTRY000349	0.16168
Up	LOC5574596	0.0911354	LOC109423496	0.230072	LOC120423833	0.0702966	CTRY003189	0.0677722
Up	LOC5574605	0.0836671	LOC109423501	0.0607253	LOC120423852	0.0288501	CTRY003185	0.0852559
Up	LOC5574612	0.626042	LOC109412718	0.17482	LOC120414286	0.74746	CTRY003081	0.351838
Up	LOC5574619	0.0905942	LOC115258668	0.0475539	LOC120419386	0.00893946	CTRY005165	0.0268565
Up	LOC5574648	4.39528	LOC115256333	4.61415	LOC120412670	4.68234	CTRY000832	7.9416
Up	LOC5574665	0.855504	LOC109426215	0.381001	LOC120413907	0.911316	CTRY011215	0.283706
Up	LOC5574673	0.106397	LOC109408741	0.134565	LOC120415370	0.0619667	CTRY007393	0.00504686
Up	LOC5574674	0.241909	LOC109428955	0.228589	LOC120415393	0.267777	CTRY007391	1.18637
Up	LOC5574741	0.320056	LOC109431071	0.278196	LOC120422045	0.378403	CTRY000382	0.3239
Up	LOC5574747	0.211495	LOC109415242	0.0661421	LOC120432327	0.142219	CTRY000435	0.0200072
Up	LOC5574752	0.0848577	LOC109431068	0.20276	LOC120431097	0.0885819	CTRY000269	0.0993151
Up	LOC5574799	0.36649	LOC109415738	0.0923138	LOC120418856	0.393336	CTRY009078	0.0185652
Up	LOC5574815	0.0400476	LOC109397121	0.0474398	LOC120420329	0.0177773	CTRY007792	0.13951
Up	LOC5574816	2.84728	LOC109409852	2.36475	LOC120426914	1.91416	CTRY007095	4.58039
Up	LOC5574834	0.200671	LOC109415142	0.218326	LOC120416313	0.225518	CTRY005389	0.274513
Up	LOC5574844	50.7914	LOC109399154	19.3429	LOC120418866	51.257	CTRY009091	26.825
Up	LOC5574866	56.1716	LOC109424016	29.896	LOC120413062	81.7304	CTRY011246	62.6249
Up	LOC5574872	0.0810694	LOC109416429	0.074752	LOC120413049	0.0315928	CTRY011242	0.0764239
Up	LOC5574881	0.0558502	LOC109421011	0.0307903	LOC120415477	0.0682649	CTRY004978	0.0603821
Up	LOC5574903	0.0936248	LOC109426798	0.0127152	LOC120426802	0.0458147	CTRY009555	0.0282985
Up	LOC5574916	0.115922	LOC109426929	0.000456152	LOC120428606	0.000812678	CTRY007617	0.00342466
Up	LOC5574917	0.0305228	LOC109401002	0.00245182	LOC120427857	0.00142219	CTRY001949	0.00234319
Up	LOC5574966	0.756792	LOC109409431	0.0183031	LOC120416916	0.286875	CTRY000647	0.417808
Up	LOC5574980	0.176426	LOC109409415	0.171456	LOC120431230	0.327509	CTRY000457	0.324982
Up	LOC5575015	0.0342028	LOC109414704	0.0579313	LOC120415904	0.0443925	CTRY011665	0.0167628
Up	LOC5575037	36.5926	LOC109421944	10.7069	LOC120415404	25.8389	CTRY007378	13.925
Up	LOC5575041	1.18335	LOC109423304	2.27158	LOC120419496	0.488724	CTRY008805	2.03262
Up	LOC5575105	38.9898	LOC109418249	20.4698	LOC120427008	32.5281	CTRY012557	25.0856
Up	LOC5575113	0.0532525	LOC115255773	0.023891	LOC120428001	0.0176757	CTRY012565	0.0349676
Up	LOC5575147	0.0504384	LOC109420659	0.0741818	LOC120413546	0.0828931	CTRY005037	0.144737
Up	LOC5575162	0.413789	LOC109420670	0.943095	LOC120413506	0.568265	CTRY005023	0.825342
Up	LOC5575203	0.045243	LOC115270233	0.0338693	LOC120422692	0.111337	CTRY010697	0.0695746
Up	LOC5575269	0.115056	LOC109413570	0.143004	LOC120424363	0.110829	CTRY006375	0.074261
Up	LOC5575274	0.859725	LOC109413576	0.408598	LOC120425130	0.697481	CTRY006369	1.45223
Up	LOC5575279	0.480571	LOC115260112	0.254134	LOC120424420	0.0716172	CTRY006364	0.13266
Up	LOC5575287	0.153372	LOC109431598	0.374045	LOC120429690	0.200833	CTRY001638	0.137888
Up	LOC5575384	0.0651586	LOC109433429	0.147508	LOC120428139	0.033523	CTRY006952	0.100937
Up	LOC5575386	0.713389	LOC109433123	0.720436	LOC120428134	0.925742	CTRY006953	1.45151
Up	LOC5575410	0.0951402	LOC109405756	0.086897	LOC120425869	0.0588176	CTRY011626	0.0868782
Up	LOC5575411	0.081827	LOC109405747	0.0427643	LOC120425863	0.118854	CTRY011625	0.105443
Up	LOC5575423	0.032904	LOC109411954	0.0319877	LOC120429182	0.0571922	CTRY006050	0.189618
Up	LOC5575488	0.0319299	LOC109407710	0.0474969	LOC120418007	0.0261073	CTRY006537	0.0513699
Up	LOC5575494	0.147527	LOC109428702	0.074809	LOC120418991	0.085128	CTRY010503	0.0854362
Up	LOC5575512	0.317783	LOC109430137	0.294332	LOC120427816	0.344067	CTRY004399	0.20584
Up	LOC5575585	0.139084	LOC109410817	0.12567	LOC120421296	0.105039	CTRY004199	0.181146
Up	LOC5575604	0.0656998	LOC109405416	0.145056	LOC120428008	0.0246851	CTRY003165	0.0140591
Up	LOC5575611	0.572465	LOC109411065	0.226594	LOC120426296	0.0717188	CTRY009630	0.155552
Up	LOC5575628	0.0527113	LOC109415723	0.0566199	LOC120426836	0.0466274	CTRY012167	0.037491
Up	LOC5575632	0.0314969	LOC109429484	0.0267989	LOC120426333	0.0468306	CTRY012168	0.0326244
Up	LOC5575640	0.533608	LOC109405471	0.481469	LOC120421010	0.443316	CTRY002384	0.822819
Up	LOC5575642	0.728867	LOC109405470	0.169632	LOC120421027	0.0345388	CTRY002392	0.0499279
Up	LOC5575681	1.3692	LOC109419050	1.6889	LOC120418961	1.57111	CTRY005055	1.21485
Up	LOC5575687	0.629505	LOC134284269	0.0849014	LOC120421841	0.243397	CTRY007765	1.07805
Up	LOC5575688	0.0813941	LOC134284271	0.254362	LOC120418150	0.119565	CTRY007766	0.431687
Up	LOC5575716	0.0849659	LOC109431792	0.0351807	LOC120412984	0.0135108	CTRY011297	0.00576784
Up	LOC5575718	3.06581	LOC109431782	3.18086	LOC120412961	1.36469	CTRY011287	6.73684
Up	LOC5575729	0.100336	LOC115262363	0.014825	LOC120416449	0.00548558	CTRY002491	0.00702956
Up	LOC5575741	0.0482736	LOC109409669	0.0818794	LOC120424166	0.033015	CTRY008858	0.0677722
Up	LOC5575751	0.301656	LOC109410371	0.39651	LOC120421753	0.22694	CTRY008639	0.125631
Up	LOC5575752	0.0792294	LOC109410370	0.112499	LOC120421752	0.0478464	CTRY008640	0.083814
Up	LOC5575753	0.500487	LOC115265400	0.0506899	LOC120421750	0.051605	CTRY008641	0.102379
Up	LOC5575759	0.0536855	LOC109621272	0.0676816	LOC120421741	0.0835026	CTRY008637	0.0427181
Up	LOC5575797	0.0823682	LOC109406138	0.141806	LOC120419337	0.113572	CTRY011109	0.252704
Up	LOC5575800	0.689902	LOC109401784	0.202418	LOC120419355	0.0118854	CTRY011110	0.010274
Up	LOC5575820	0.338998	LOC109430553	0.358251	LOC120430655	0.147704	CTRY009858	0.683309
Up	LOC5575822	0.592813	LOC109430552	0.622249	LOC120430654	0.587769	CTRY009859	1.08454
Up	LOC5575831	0.94166	LOC109413226	0.60309	LOC120432217	0.345998	CTRY000147	1.11373
Up	LOC5575846	0.301872	LOC109423921	0.207834	LOC120432447	0.370581	CTRY003986	0.234499
Up	LOC5575848	1.60093	LOC109404801	1.42382	LOC120412505	0.79358	CTRY003571	3.54614
Up	LOC5575852	0.156294	LOC109404802	0.36954	LOC120415521	0.0752743	CTRY004231	0.0510094
Up	LOC5575941	0.101418	LOC109412536	0.0857566	LOC120428836	0.131247	CTRY009334	0.129416
Up	LOC5575957	0.0849659	LOC109422853	0.0782301	LOC120420359	0.0388054	CTRY009880	0.0603821
Up	LOC5575982	0.205001	LOC109429299	0.14671	LOC120428324	0.195347	CTRY004681	0.66925
Up	LOC5575983	0.902154	LOC109397805	0.234747	LOC120421060	0.999797	CTRY000364	1.81903
Up	LOC5575986	0.649637	LOC109425537	0.0435625	LOC120425504	0.741264	CTRY001977	0.977469
Up	LOC5576021	0.125555	LOC109405842	0.176417	LOC120429861	0.0414466	CTRY012427	0.135184
Up	LOC5576023	0.0316051	LOC109424617	0.0217813	LOC120431694	0	CTRY000700	0.0409156
Up	LOC5576028	0.156727	LOC109431816	0.0385449	LOC120416273	0.0534336	CTRY004825	0.0957102
Up	LOC5576033	0.0520619	LOC109431824	0.0880944	LOC120419804	0.0378911	CTRY005723	0.0877794
Up	LOC5576041	0.0850741	LOC115263319	0.0634052	LOC120426781	0.0498781	CTRY010290	0.270548
Up	LOC5576069	1.02922	LOC109420816	1.53923	LOC120412593	0.279155	CTRY009359	1.15645
Up	LOC5576082	0.430891	LOC109406020	0.462595	LOC120413183	0.815116	CTRY009792	0.444665
Up	LOC5576103	0.576794	LOC115269975	0.70601	LOC120417445	0.381247	CTRY011473	1.25829
Up	LOC5576104	0.289966	LOC109419329	0.162732	LOC120417444	0.205811	CTRY011474	0.889329
Up	LOC5576159	0.158675	LOC109406257	0.0614095	LOC120421845	0.0118854	CTRY007760	0.568313
Up	LOC5576176	0.0311722	LOC109405879	0.0407686	LOC120420234	0.0237708	CTRY004534	0.0419971
Up	LOC5576203	0.285096	LOC109402444	0.198825	LOC120421780	0.0679602	CTRY002998	0.23522
Up	LOC5576214	1.4165	LOC134291854	1.71439	LOC120418437	2.61885	CTRY006926	4.31164
Up	LOC5576215	94.0411	LOC109422297	41.5029	LOC120416753	23.6332	CTRY006896	73.5069
Up	LOC5576219	0.0294404	LOC109424388	0.0254305	LOC120416720	0.00782202	CTRY006891	0.0328046
Up	LOC5576221	0.803983	LOC134291863	0.926731	LOC120416759	1.87089	CTRY006889	2.44394
Up	LOC5576226	0.0513043	LOC134291853	0.0262858	LOC120415299	0.0360626	CTRY006295	0.101118
Up	LOC5576244	2.41325	LOC109422254	1.09762	LOC120428195	3.05557	CTRY006274	2.22693
Up	LOC5576287	0.295378	LOC109425514	0.117915	LOC120428284	0.0671475	CTRY003247	0.551009
Up	LOC5576302	0.0586644	LOC109421817	0.0911164	LOC120426471	0.0398212	CTRY001586	0.0652487
Up	LOC5576321	0.115597	LOC109425968	0.200194	LOC120427874	0.204084	CTRY008314	0.241709
Up	LOC5576344	0.3272	LOC109623099	0.1446	LOC120424769	0.147907	CTRY002172	0.278479
Up	LOC5576353	4.85269	LOC109416865	5.76035	LOC120427414	9.12678	CTRY003223	2.5465
Up	LOC5576360	0.593679	LOC109623083	0.0220094	LOC120426214	0.164974	CTRY002202	0.0441601
Up	LOC5576407	0.0458924	LOC109418829	0.0622648	LOC120420424	0.0115807	CTRY006731	0.0310022
Up	LOC5576408	0.488581	LOC109418833	0.433345	LOC120420430	0.0617635	CTRY006729	0.0556957
Up	LOC5576426	0.0810694	LOC109398728	0.00849584	LOC120420151	0.0453068	CTRY004514	0.2062
Up	LOC5576478	0.0621279	LOC109422938	0.104345	LOC120416233	0.0565827	CTRY000482	0.151406
Up	LOC5576486	0.180431	LOC109403521	0.24387	LOC120416236	0.304551	CTRY000475	0.11049
Up	LOC5576502	0.0393982	LOC109419906	0.0504619	LOC120428678	0.0290532	CTRY004791	0.0569575
Up	LOC5576518	0.522892	LOC109423534	0.157487	LOC120424234	0.127286	CTRY003003	0.843367
Up	LOC5576530	0.0644009	LOC109423546	0.0730414	LOC120425406	0.0741568	CTRY002157	0.0807498
Up	LOC5576538	0.0485983	LOC109433612	0.0139697	LOC120419270	0.0456115	CTRY001403	0.0259553
Up	LOC5576547	0.0675398	LOC109404578	0.0525716	LOC120418907	0.105547	CTRY009204	0.0708363
Up	LOC5576552	0.499188	LOC109400667	0.148592	LOC120418910	0.172186	CTRY009201	0.142213
Up	LOC5576569	0.0547678	LOC109423624	0.0399704	LOC120424635	0.0181837	CTRY003148	0.038212
Up	LOC5576572	0.461522	LOC109425117	0.615521	LOC120416294	0.618753	CTRY005368	0.713591
Up	LOC5576631	0.245373	LOC109409093	0.140153	LOC120417833	0.230699	CTRY008562	0.416907
Up	LOC5576642	1.31378	LOC115253756	1.01927	LOC120427768	3.10138	CTRY005619	2.91294
Up	LOC5576653	36.8603	LOC109428069	20.2556	LOC120432390	47.0186	CTRY012527	29.1961
Up	LOC5576658	3.29137	LOC109418288	3.2583	LOC120432375	0	CTRY012531	7.50811
Up	LOC5576672	0.571382	LOC109417573	0.525488	LOC120412403	0.187627	CTRY009539	0.846972
Up	LOC5576758	32.462	LOC109416823	22.1122	LOC120422611	33.4907	CTRY001232	31.4533
Up	LOC5576767	0.139084	LOC109416470	0.161763	LOC120424884	0.23395	CTRY010372	0.150685
Up	LOC5576801	0.533824	LOC109402934	0.934143	LOC120412352	0	CTRY009668	0
Up	LOC5576834	0.107263	LOC109400190	0.117003	LOC120432163	0.0593255	CTRY011830	0.174297
Up	LOC5576835	1.71772	LOC134291442	1.70156	LOC120432172	0	CTRY011834	0.785689
Up	LOC5576852	0.185193	LOC109413865	0.108279	LOC120413215	0.487302	CTRY009765	0.794881
Up	LOC5576896	1.21431	LOC109418604	0.535181	LOC120423866	2.07111	CTRY001296	2.30822
Up	LOC5576906	0.0787964	LOC109397146	0.0124302	LOC120418149	0.0477448	CTRY007780	0.0906633
Up	LOC5576917	0.900097	LOC109412743	1.1568	LOC120416068	0	CTRY002524	0.237924
Up	LOC5576921	0.098712	LOC109411852	0.0372334	LOC120416082	0.300081	CTRY002523	1.41673
Up	LOC5576963	0.0885377	LOC109417738	0.105941	LOC120413572	0.0610524	CTRY005021	0.178082
Up	LOC5576966	1110.57	LOC109420035	460.686	LOC120413573	0	CTRY005019	25.2422
Up	LOC5577011	0.133564	LOC109399928	0.382199	LOC120431785	0.166193	CTRY002927	0.138789
Up	LOC5577025	0.11722	LOC109409327	0.0293078	LOC120418977	0.0722267	CTRY005060	0.161139
Up	LOC5577034	37.9248	LOC109428755	18.8138	LOC120419418	45.8676	CTRY006081	43.7707
Up	LOC5577042	1.94047	LOC109405102	0.0826776	LOC120432214	0.42503	CTRY000428	0.376712
Up	LOC5577080	0.256413	LOC109399413	0.276827	LOC120412395	0.598131	CTRY009531	0.593187
Up	LOC5577105	0.208139	LOC109417669	0.259095	LOC120421110	0.256705	CTRY004870	0.798306
Up	LOC5577175	0.0346358	LOC109424687	0.0442468	LOC120428242	0.0432751	CTRY007078	0.0425379
Up	LOC5577178	0.724104	LOC109424709	0.0965332	LOC120428239	0.659183	CTRY007083	0.13987
Up	LOC5577193	0.213876	LOC109428473	0.301631	LOC120432226	0.478667	CTRY000291	0.489906
Up	LOC5577200	0.146011	LOC109423597	0.106569	LOC120430171	0.129724	CTRY002035	0.0668709
Up	LOC5577203	0.264206	LOC109401184	0.192496	LOC120421455	0.124949	CTRY006692	0.0401947
Up	LOC5577250	0.300141	LOC109415577	0.110389	LOC120424142	0.079744	CTRY001646	0.335977
Up	LOC5577252	0.0323628	LOC109431497	0.112499	LOC120424139	0.0241772	CTRY001645	0.055155
Up	LOC5577256	0.0611538	LOC109431454	0.0882085	LOC120431852	0.126879	CTRY001783	0.195205
Up	LOC5577278	0.214634	LOC109426376	0.159596	LOC120415206	0.0942706	CTRY007692	0.194124
Up	LOC5577322	0.0528196	LOC109427216	0.0938534	LOC120427941	0.0998578	CTRY010885	0.100036
Up	LOC5577326	0.111051	LOC109427223	0.138613	LOC120427946	0.0767981	CTRY010882	0.0454218
Up	LOC5577356	0.665656	LOC109411624	0.172312	LOC120422710	0.267879	CTRY010859	0.280281
Up	LOC5577377	1.01797	LOC115256322	0.642377	LOC120418244	0.00711093	CTRY010845	0.000540735
Up	LOC5577382	0.0773893	LOC109404438	0.0905462	LOC120418266	0.0970134	CTRY010840	0.115717
Up	LOC5577385	0.19277	LOC109404433	0.0715589	LOC120418257	0.139273	CTRY010839	0.201154
Up	LOC5577396	0.0451348	LOC109411047	0.0200137	LOC120414299	0.150853	CTRY003108	0.16925
Up	LOC5577429	0.265397	LOC109427694	0.185768	LOC120424572	0.138765	CTRY005700	0.137347
Up	LOC5577470	0.206516	LOC109621502	0.111472	LOC120418422	0.156644	CTRY005100	0.192141
Up	LOC5577478	46.5091	LOC109411193	20.7207	LOC120412343	60.7229	CTRY008036	47.7322
Up	LOC5577483	0.261067	LOC109413115	0.422283	LOC120414889	0.46475	CTRY006628	0.504506
Up	LOC5577524	1.39106	LOC109412434	0.566484	LOC120423846	0.493295	CTRY003196	1.07516
Up	LOC5577555	0.441823	LOC115269198	0.654579	LOC120426190	0.298253	CTRY008579	0.322459
Up	LOC5577566	27.4701	LOC109622780	14.3572	LOC120421114	28.8796	CTRY004873	2.1898
Up	LOC5577568	1.79045	LOC109417825	0.056848	LOC120412428	1.80374	CTRY009546	2.16619
Up	LOC5577616	0.0488148	LOC134289036	0.041852	LOC120427333	0.0659285	CTRY004765	0.0428983
Up	LOC5577626	0.891547	LOC109420697	1.20327	LOC120412842	1.30486	CTRY004463	2.18998
Up	LOC5577645	0.0800953	LOC109416065	0.0684799	LOC120425081	0.699716	CTRY003397	0.1177
Up	LOC5577667	0.0841	LOC109402937	0.0349527	LOC120425051	0	CTRY003411	0.044881
Up	LOC5577721	0.0760905	LOC109428235	0.0944235	LOC120414665	0.0539415	CTRY005949	0.0547945
Up	LOC5577723	11.2012	LOC115266377	8.54259	LOC120414684	19.8021	CTRY005950	17.9892
Up	LOC5577747	0.0875636	LOC109409866	0.117117	LOC120428798	0.088785	CTRY008019	0.207823
Up	LOC5577761	1.30739	LOC134289612	1.1438	LOC120432652	0	CTRY008027	0.0140591
Up	LOC5577765	1.40481	LOC134289613	0.154351	LOC120432651	0.00111743	CTRY008030	0.00324441
Up	LOC5577771	0.184111	LOC109428856	0.19683	LOC120429081	0.101077	CTRY007303	0.161139
Up	LOC5577809	0.161381	LOC109398849	0.323925	LOC120421491	0.180821	CTRY010976	0.268926
Up	LOC5577917	0.139842	LOC109427581	0.0207549	LOC120415555	0.0353515	CTRY004261	0.0320836
Up	LOC5577945	0.224267	LOC134291377	0.0272551	LOC128093593	0.545205	CTRY011378	0.366078
Up	LOC5577996	60.4408	LOC109413708	17.0108	LOC120432401	41.6206	CTRY012525	53.0889
Up	LOC5578008	0.071761	LOC134289491	0.0583875	LOC120432376	0.0746648	CTRY012512	0.143475
Up	LOC5578012	0.0442689	LOC134289490	0.0596419	LOC120432380	0.128911	CTRY012510	0.27938
Up	LOC5578022	0.190713	LOC109399713	0.240962	LOC120422250	0.213633	CTRY011854	0.733598
Up	LOC5578027	0.0821517	LOC109402037	0.0896339	LOC120422246	0.108696	CTRY011847	0.253605
Up	LOC5578054	0.090053	LOC109423352	0.0761204	LOC120419755	0.122206	CTRY008663	0.140591
Up	LOC5578080	0.035177	LOC115268126	0.0248033	LOC120416843	0.0636936	CTRY008104	0.0885004
Up	LOC5578082	1.15792	LOC115267841	0.959345	LOC120427642	1.79094	CTRY001742	2.7765
Up	LOC5578096	0.390302	LOC109399631	0.32689	LOC120416861	0.206217	CTRY008122	0.181327
Up	LOC5578101	1.10856	LOC134291869	0.0699624	LOC120416824	0.414974	CTRY008127	0.41889
Up	LOC5578103	0.275354	LOC109399658	0.0515452	LOC120416823	0.549269	CTRY008128	0.56615
Up	LOC5578123	71.2247	LOC109399666	31.6719	LOC120416844	67.7869	CTRY008140	67.5451
Up	LOC5578147	0.376339	LOC109412192	0.476109	LOC120425015	0.38592	CTRY001628	0.543619
Up	LOC5578155	6.71674	LOC109424394	3.15846	LOC120431279	0	CTRY005888	39.093
Up	LOC5578158	0.0361511	LOC109424428	0.0391151	LOC120431286	0.0327103	CTRY005889	0.0484859
Up	LOC5578184	0.540535	LOC109431314	0.336526	LOC128092666	0.620784	CTRY006227	0.594088
Up	LOC5578206	0.0623444	LOC109410099	0.035979	LOC120425224	0.0314913	CTRY008621	0.0362293
Up	LOC5578218	0.0649421	LOC109410018	0.0396853	LOC120422873	0.0860423	CTRY008612	0.0165826
Up	LOC5578243	56.9787	LOC115268659	16.1443	LOC120416092	30.9911	CTRY005261	31.87
Up	LOC5578293	0.489555	LOC109416142	0.51511	LOC120427315	0.35514	CTRY010778	0.378875
Up	LOC5578307	5.57723	LOC109401885	8.86361	LOC120417695	4.87647	CTRY003580	0.00522711
Up	LOC5578313	30.2205	LOC109420976	12.4424	LOC120421966	39.8076	CTRY004689	33.6855
Up	LOC5578343	0.2339	LOC109424491	0.14882	LOC128092953	0.380232	CTRY006884	0.299027
Up	LOC5578344	0.0396147	LOC115260228	0.0453301	LOC128092809	0.0423608	CTRY006882	0.045602
Up	LOC5578360	1.39929	LOC109412019	0.97035	LOC120415674	3.04246	CTRY005840	3.22098
Up	LOC5578368	64.2179	LOC109407908	42.4847	LOC120415684	73.2332	CTRY005847	89.5681
Up	LOC5578372	0.073601	LOC115262431	0.0186452	LOC120415669	0.0541447	CTRY005850	0.0641673
Up	LOC5578379	0.0878883	LOC109405673	0.00245182	LOC120413801	0.000406339	CTRY011548	0.00378515
Up	LOC5578443	0.162355	LOC109403714	0.120994	LOC120413990	0.209976	CTRY011075	0.505407
Up	LOC5578455	3.07771	LOC109403738	1.39172	LOC120413999	0.017371	CTRY011087	0.0223504
Up	LOC5578525	0.0690551	LOC115257588	0.041852	LOC120417578	0.0187932	CTRY006439	0.0542538
Up	LOC5578532	0.34809	LOC109429328	0.859676	LOC120429645	0.583807	CTRY001954	0.978371
Up	LOC5578538	0.799112	LOC109417839	0.973714	LOC120426800	0.872918	CTRY009554	1.51406
Up	LOC5578562	0.171555	LOC109418342	0.0992131	LOC120420459	0.052113	CTRY012377	0.475667
Up	LOC5578575	0.276329	LOC115267805	0.092884	LOC120420344	0.144961	CTRY007807	0.135905
Up	LOC5578594	0.19396	LOC109400660	0.0826776	LOC120418914	0.125457	CTRY009211	0.160058
Up	LOC5578608	0.0868059	LOC109402733	0.0790284	LOC120412396	0.0710077	CTRY009517	0.118601
Up	LOC5578624	0.15651	LOC115269053	0.159938	LOC120413351	0.380333	CTRY001529	1.34427
Up	LOC5578625	36.2277	LOC115254221	17.7404	LOC120417714	16.369	CTRY000541	23.4677
Up	LOC5578654	0.0896201	LOC109401916	0.0565059	LOC120419260	0.0471353	CTRY001380	0.198991
Up	LOC5578661	0.00627774	LOC109431492	0.0169347	LOC120426450	0.127997	CTRY001660	0.302271
Up	LOC5578715	0.0479489	LOC109622735	0.0165355	LOC120430807	0.0225518	CTRY001826	0.0140591
Up	LOC5578734	0.641087	LOC134289441	0.372905	LOC120416977	0.594169	CTRY011911	0.409337
Up	LOC5578754	0.0252192	LOC109404751	0.039001	LOC120420806	0.0514019	CTRY005143	0.0520908
Up	LOC5578793	1.25511	LOC109398643	0.287376	LOC120421717	0.0746648	CTRY005126	0.0807498
Up	LOC5578794	0.300141	LOC109398644	0.355115	LOC120421720	0.649126	CTRY005123	0.80858
Up	LOC5578825	0.282823	LOC109423066	0.126354	LOC120415625	0.00375863	CTRY000681	0.0268565
Up	LOC5578827	0.0970884	LOC109423070	0.0559357	LOC120415641	0.0964039	CTRY000674	0.0875991
Up	LOC5578833	0.797705	LOC109399426	0.901243	LOC128092262	0	CTRY009214	2.41384
Up	LOC5578839	1.15391	LOC109432534	0.815486	LOC120419647	0.777326	CTRY004291	1.78407
Up	LOC5578854	0.063535	LOC109424273	0.0849014	LOC120427116	0.1346	CTRY010494	0.13212
Up	LOC5578855	0.160948	LOC109428708	0.110617	LOC120427114	0.24746	CTRY010493	0.101118
Up	LOC5578856	0.0789046	LOC115270173	0.143061	LOC120427113	0.0840106	CTRY010492	0.472242
Up	LOC5578857	1.6583	LOC109424268	1.71741	LOC120427130	1.02438	CTRY010491	1.48396
Up	LOC5578966	0.169715	LOC109622810	0.112613	LOC120424360	0.047948	CTRY004597	0.0410959
Up	LOC5578997	0.0830176	LOC109402691	0.0482951	LOC120422451	0.0303738	CTRY001150	0.0520908
Up	LOC5578998	0.0686221	LOC109397913	0.0680237	LOC120422452	0.0446973	CTRY001151	0.0585797
Up	LOC5579005	0.0460006	LOC109397890	0.00821074	LOC120417689	0.046221	CTRY001144	0.0261355
Up	LOC5579032	0.167009	LOC109423344	0.121108	LOC120419483	0.265441	CTRY008808	0.510274
Up	LOC5579059	0.0656998	LOC109406026	0.22494	LOC120413256	1.3016	CTRY009804	0.699892
Up	LOC5579060	0.479273	LOC109406031	0.456152	LOC120413249	0	CTRY009806	0.660418
Up	LOC5579094	0.0797705	LOC109409889	0.567853	LOC120432661	0	CTRY008039	0.0423576
Up	LOC5579114	0.374283	LOC109399104	0.562151	LOC120412362	0.286672	CTRY008052	0.635725
Up	LOC5579146	0.24245	LOC109397908	0.106055	LOC120427524	0.209569	CTRY008714	0.534427
Up	LOC5579167	0.231302	LOC134290016	0.301745	LOC120414577	0.00446973	CTRY012065	0.0302812
Up	LOC5579186	19.8951	LOC109404863	7.66085	LOC120415419	6.33188	CTRY012050	23.8419
Up	LOC5579196	0.0793376	LOC109415589	0.0801118	LOC120425008	0.0684681	CTRY001635	0.0201875
Up	LOC5579214	0.315077	LOC109417111	0.0571331	LOC120424947	0.0475416	CTRY001816	0.284607
Up	LOC5579278	0.292456	LOC109410717	0.373817	LOC120419084	0.174116	CTRY011780	0.202235
Up	LOC5579328	0.198073	LOC109423323	0.384593	LOC120417809	0.268184	CTRY008552	0.493872
Up	LOC5579447	0.03929	LOC109410777	0.0271981	LOC120413488	0.033015	CTRY009690	0.0216294
Up	LOC5579480	0.383916	LOC109405137	0.321929	LOC120429148	0.31989	CTRY009456	0.642394
Up	LOC5579654	3.33997	LOC109424429	0.977249	LOC120424646	0.256298	CTRY006350	0.491348
Up	LOC5579658	0.0514125	LOC109422328	0.0362071	LOC120424319	0.0761885	CTRY006346	0.0441601
Up	LOC5579660	0.121117	LOC109422323	0.0844452	LOC120425222	0.0313897	CTRY006344	0.16889
Up	LOC5579796	0.305228	LOC115253931	0.120025	LOC120418430	0	CTRY006937	0.158435
Up	LOC5579811	0.0337699	LOC115256382	0.0202418	LOC120415049	0.0121902	CTRY000064	0.0133381
Up	LOC5579819	0.0864812	LOC109424971	0.160566	LOC120415059	0.0852296	CTRY000074	0.164924
Up	LOC5579851	0.250785	LOC109398993	0.143004	LOC120415011	0.353312	CTRY006203	0.20584
Up	LOC5579853	0.508064	LOC109399010	0.400787	LOC120414981	0.430618	CTRY006202	0.664203
Up	LOC5579888	0.0768481	LOC109398743	0.13103	LOC120420471	0.0447989	CTRY012373	0.12527
Up	LOC5579906	0.0843165	LOC109410394	0.0855856	LOC120431965	0.0502844	CTRY012452	0.0847152
Up	LOC5579911	0.0501137	LOC109410403	0.0187022	LOC120425919	0.179195	CTRY012448	0.119503
Up	LOC5579923	0.0705704	LOC109426430	0.027084	LOC120426519	0.101889	CTRY007250	1.03118
Up	LOC5579938	0.181513	LOC115261348	0.150302	LOC120429953	0.000304754	CTRY011019	0.00594809
Up	LOC5579954	0.88949	LOC109406193	0.00193865	LOC120423541	0.185291	CTRY002684	0.0564167
Up	LOC5579955	0.59855	LOC109406196	0.00684229	LOC120423538	0.00152377	CTRY002687	0.0019827
Up	LOC5580010	1.94015	LOC109411856	0.912704	LOC120416356	1.47755	CTRY002516	4.52199
Up	LOC5580011	0.401559	LOC109411854	0.214905	LOC120416109	0.227347	CTRY002517	0.150505
Up	LOC5580030	35.8411	LOC109412987	14.0632	LOC120431174	46.6696	CTRY000458	21.4832
Up	LOC5580036	1.19959	LOC109423962	1.37028	LOC120421130	1.66863	CTRY004083	2.67844
Up	LOC5580056	0.307176	LOC115267212	0.0965903	LOC120414526	0.404002	CTRY001105	1.04777
Up	LOC5580070	0.962658	LOC109402212	0.641863	LOC120414540	0.34874	CTRY001107	0.540375
Up	LOC5580072	0.0476242	LOC109428390	0.0379177	LOC120424295	0.0342341	CTRY000035	0.0439798
Up	LOC5580119	0.536746	LOC109433003	0.14078	LOC120412464	2.06471	CTRY000929	0.945205
Up	LOC5580182	0.20132	LOC109419802	0.171399	LOC120428906	0.145774	CTRY002008	0.148342
Up	LOC5580192	0.498106	LOC109419814	0.378835	LOC120427397	0.171373	CTRY003235	0.870945
Up	LOC5580239	3.9474	LOC109421919	4.09077	LOC120419134	5.6028	CTRY007558	7.80966
Up	LOC5580259	24.3364	LOC109424214	13.6801	LOC120428359	29.1728	CTRY005618	29.37
Up	LOC5580311	0.220695	LOC109419243	0.0859847	LOC120413806	0.1154	CTRY011969	0.00901226
Up	LOC5580329	15.8034	LOC109420083	6.07338	LOC120419194	14.5321	CTRY005470	11.1384
Down	LOC110673981	0.123065	LOC109427304	0.0502908	LOC120415083	0.119159	CTRY012482	0.152487
Down	LOC110674008	0.181946	LOC109430819	0.0283955	LOC120414487	0.0375863	CTRY009965	0.0501081
Down	LOC110674038	0.0774976	LOC109400937	0.00587296	LOC120427858	0	CTRY001947	0.00450613
Down	LOC110674049	0.361186	LOC109397298	0.425932	LOC120427258	0	CTRY002251	0.399784
Down	LOC110674148	11.2785	LOC109423617	0.0337553	LOC120432512	8.17808	CTRY002427	4.85851
Down	LOC110674164	0.119602	LOC109402430	0.122591	LOC120421005	0.149228	CTRY002387	0.685833
Down	LOC110674166	0.616842	LOC115269183	0.284924	LOC120424610	0.41985	CTRY003153	0.94827
Down	LOC110674263	0.29159	LOC109406853	0.108108	LOC120431936	0.572328	CTRY007621	0.355443
Down	LOC110674749	0.19764	LOC109415811	0.09277	LOC120430287	0.0115807	CTRY000205	0.156092
Down	LOC110674760	0.130967	LOC109405106	0.149618	LOC120432215	0.164262	CTRY000818	2.04524
Down	LOC110674836	0.167442	LOC109428470	0.0391151	LOC120430936	0.148111	CTRY000290	0.453136
Down	LOC110675318	0.620305	LOC109422005	0.3554	LOC120421456	1.11103	CTRY001268	2.3832
Down	LOC110675403	0.30144	LOC115265773	0.242331	LOC120419775	0	CTRY008650	0.353641
Down	LOC110675493	34.5996	LOC109419974	20.8736	LOC120412866	42.7096	CTRY009137	42.0265
Down	LOC110675609	19.9104	LOC115265344	3.26577	LOC128093366	0	CTRY008951	20.0422
Down	LOC110675610	16.4596	LOC115265356	3.16906	LOC128093535	5.57212	CTRY005366	0
Down	LOC110675611	4.01569	LOC115265355	1.67431	LOC120428813	2.2242	CTRY008952	3.48252
Down	LOC110675667	0.376556	LOC109416460	0.397309	LOC120424871	0.458452	CTRY010380	0.479993
Down	LOC110675983	0.102609	LOC109399418	0.0507469	LOC120420668	0.0628809	CTRY009229	0.135544
Down	LOC110676030	0.361511	LOC109425691	0.31982	LOC120431867	0.352601	CTRY010560	0.840483
Down	LOC110676045	75.8082	LOC109425736	21.6735	LOC120424862	36.9292	CTRY009594	6.40267
Down	LOC110676126	0.0876718	LOC115253630	0.144714	LOC120418550	0.130943	CTRY011329	0.000720981
Down	LOC110676232	29.1437	LOC109404346	13.2045	LOC120424488	28.3274	CTRY010122	10.265
Down	LOC110676240	0.100985	LOC109432997	0.0635762	LOC120422087	0.000304754	CTRY000385	0
Down	LOC110676279	6.29873	LOC115261752	0.669176	LOC120415783	1.33381	CTRY002061	0.00036049
Down	LOC110676327	0.310207	LOC109430629	0.051032	LOC120417482	0.202357	CTRY010725	0.116438
Down	LOC110676515	0.133023	LOC115258796	0.145912	LOC120431191	0.197379	CTRY005896	0.233237
Down	LOC110676550	0.126637	LOC109408287	0.144942	LOC120423669	0.118245	CTRY005685	0.240988
Down	LOC110676623	0.14796	LOC109404233	0.0579884	LOC120416071	0.0795408	CTRY005334	0.0560562
Down	LOC110676984	0.296352	LOC109416261	0.12128	LOC120421126	0.242686	CTRY004091	0.0625451
Down	LOC110677031	0.122416	LOC109421520	0.113297	LOC120432433	0.105242	CTRY003999	0.145818
Down	LOC110677182	9.6952	LOC109408543	10.2708	LOC120423401	42.6489	CTRY003635	44.2732
Down	LOC110677676	1.73471	LOC109423689	0.00176759	LOC120419720	0.000507924	CTRY012010	0.00108147
Down	LOC110677877	0.172746	LOC109405984	0.0547953	LOC120422480	0.0510971	CTRY011497	0.212329
Down	LOC110678029	0.821193	LOC115262585	0.703216	LOC120428187	0.212922	CTRY007065	0.313446
Down	LOC110678069	0.125663	LOC109431675	0.083761	LOC120429234	0.25061	CTRY010701	0.0645278
Down	LOC110678423	0.026951	LOC109425581	3.37005	LOC120424752	0	CTRY006827	2.52686
Down	LOC110678484	0.301115	LOC109401305	0.0201277	LOC120421481	0.272349	CTRY006701	1.22999
Down	LOC110678647	0.106613	LOC109419296	0.0302201	LOC120413651	0.108899	CTRY011952	0.168349
Down	LOC110678734	23.0454	LOC109425568	4.28601	LOC120419254	21.6746	CTRY011808	0
Down	LOC110678790	0.134105	LOC134291420	0.01186	LOC120414892	0.104226	CTRY006607	0.109769
Down	LOC110678949	1.40589	LOC115261471	10.3661	LOC120426530	0.261174	CTRY010888	17.1619
Down	LOC110678983	0.619981	LOC115271083	0.338294	LOC120414391	0.379114	CTRY011382	0.162401
Down	LOC110678987	0.114839	LOC134283946	0.00786863	LOC120417377	0.0296627	CTRY007887	0.00270368
Down	LOC110679171	0.336292	LOC109397755	0.24923	LOC120421370	0.653393	CTRY006132	0.167087
Down	LOC110679174	0.127503	LOC109423210	0.0784012	LOC120426014	0.0319992	CTRY002300	0.0522711
Down	LOC110679353	0.817404	LOC109401240	0.251967	LOC120421446	0.52692	CTRY006700	1.10004
Down	LOC110679499	0.171555	LOC109423479	0.0721291	LOC120426234	0.00243803	CTRY002596	0.010995
Down	LOC110679583	0.939063	LOC115256000	0.541168	LOC120421856	0.496241	CTRY007118	0.175379
Down	LOC110679616	0.311397	LOC109413556	0.728247	LOC120424208	0.237607	CTRY006361	0.0886806
Down	LOC110679707	0.000108237	LOC109430321	0.00798267	LOC120423302	0	CTRY003212	0.00234319
Down	LOC110679868	0.416279	LOC109401653	0.415783	LOC120422549	0.361743	CTRY002855	0.527938
Down	LOC110680525	0.190497	LOC109431473	0.364979	LOC120429238	0.290126	CTRY001728	0.513158
Down	LOC110680755	0.677671	LOC109431645	7.82564	LOC120425631	17.6402	CTRY001732	19.8248
Down	LOC110680939	1.49291	LOC109416926	20.6189	LOC120419970	53.1454	CTRY010247	42.5606
Down	LOC110681196	0.168958	LOC109415405	0.0506329	LOC120415681	0.0975213	CTRY002546	0.132841
Down	LOC23687388	0.113216	LOC109412873	0.032957	LOC120430437	0.04551	CTRY002650	0.0538933
Down	LOC23687393	0.164087	LOC109429383	0.199168	LOC120416312	0.302316	CTRY005365	0.294701
Down	LOC23687462	0.42299	LOC109419651	0.440643	LOC120422336	0	CTRY008972	3.29019
Down	LOC23687484	0.213984	LOC109426230	0.195518	LOC120413940	0.192503	CTRY011225	0.0976929
Down	LOC23687495	1.86167	LOC109404332	1.32142	LOC120424480	2.38948	CTRY010124	1.24045
Down	LOC23687501	1.15943	LOC109428447	0.788516	LOC120432248	0.557294	CTRY000170	1.15537
Down	LOC23687502	0.231843	LOC109401390	0.0769187	LOC120419184	0.480699	CTRY005468	0.324261
Down	LOC23687516	45.3694	LOC109418072	20.6551	LOC120427560	80.0395	CTRY009168	62.0303
Down	LOC23687533	0.157052	LOC109418264	0.147052	LOC120427005	0.328627	CTRY012547	0.177361
Down	LOC23687552	0.0467583	LOC109399239	0.00963622	LOC120422629	0.21221	CTRY010426	0.00342466
Down	LOC23687553	0.223509	LOC109423362	0.313377	LOC120416502	0.48974	CTRY009495	0.3677
Down	LOC23687567	0.0787964	LOC109425718	0.0216672	LOC120428136	0	CTRY006951	0.0785869
Down	LOC23687575	0.100444	LOC109420448	0.0692211	LOC120429072	0.0133076	CTRY003451	0.0182048
Down	LOC23687579	0.153696	LOC109420687	0.208177	LOC120412802	0	CTRY004466	0.0533526
Down	LOC23687581	0.0841	LOC115265269	0.26263	LOC120429255	0.328728	CTRY009271	0.405552
Down	LOC23687618	63.1798	LOC109431357	31.8515	LOC120418068	0	CTRY001711	36.3915
Down	LOC23687627	0.118411	LOC109425480	0.180636	LOC120418343	0.0862454	CTRY003250	0.0385725
Down	LOC23687632	1.05845	LOC109420460	2.28452	LOC120429844	2.55689	CTRY003445	1.33598
Down	LOC23687644	0.138002	LOC109408139	0.0589577	LOC120413114	0.0649126	CTRY005551	0.105804
Down	LOC23687646	0.401992	LOC109428050	0.103319	LOC120432378	0.111134	CTRY012540	0.0803893
Down	LOC23687659	0.144929	LOC134284882	0.00433345	LOC120422049	0.108696	CTRY000401	0.174477
Down	LOC23687671	0.263665	LOC109424480	0.773805	LOC120418661	0.211499	CTRY010533	0.291096
Down	LOC23687710	0.865462	LOC109622895	1.10189	LOC120422806	2.10219	CTRY005870	0.0564167
Down	LOC23687735	1.14569	LOC109400776	0.353689	LOC120425958	0.378403	CTRY008091	2.135
Down	LOC23687740	0.721507	LOC109400780	0.0612955	LOC120420109	0.000812678	CTRY009420	3.28947
Down	LOC23687777	0.100552	LOC109429511	0.144885	LOC120423760	0.0655221	CTRY012344	0.228911
Down	LOC23687783	0.152073	LOC109408106	0.0379747	LOC120413130	0.178586	CTRY005547	0.290375
Down	LOC23687802	0.0520619	LOC109421007	0.0753222	LOC120415468	0.0801503	CTRY004983	0.0939077
Down	LOC23687811	0.242883	LOC109428415	0.0494925	LOC120414169	0.14232	CTRY001311	0.063987
Down	LOC23687815	0.539344	LOC115260377	0.366689	LOC120416721	0.0233645	CTRY006892	0.343547
Down	LOC23687827	0.579825	LOC109424044	0.702988	LOC120413976	0.00812678	CTRY011226	0.0155011
Down	LOC23687839	2.6938	LOC109417743	1.68218	LOC120415968	4.62129	CTRY004726	0.10328
Down	LOC23687841	0.371252	LOC109419547	0.296556	LOC120425472	0.575985	CTRY001867	0.531182
Down	LOC23687858	0.0423206	LOC109414182	0.0582164	LOC120412807	0.0456115	CTRY004464	0.0270368
Down	LOC23687901	1.5716	LOC109400736	1.86173	LOC120425410	4.90593	CTRY002159	1.20458
Down	LOC23687928	0.168092	LOC109423623	0.158627	LOC120424634	0.279155	CTRY003149	0.331471
Down	LOC23687932	0.255872	LOC109418846	0.0243471	LOC120420435	0.159183	CTRY006719	0.306777
Down	LOC5563554	0.0868059	LOC115254260	0.11535	LOC120414117	0.0650142	CTRY010215	0.154831
Down	LOC5563575	0.357831	LOC109415500	0.197172	LOC120417115	0.0790329	CTRY011766	0.502163
Down	LOC5563577	0.293646	LOC109409048	0.94817	LOC120427908	0.0356562	CTRY001983	0.153749
Down	LOC5563585	0.159541	LOC115254261	0.293363	LOC120414118	0.880232	CTRY010216	1.45638
Down	LOC5563589	0.631562	LOC109415495	0.347132	LOC120417128	0.751524	CTRY011762	0.865717
Down	LOC5563592	25.3661	LOC109400867	28.5693	LOC120417163	98.7125	CTRY011759	70.6759
Down	LOC5563635	0.140708	LOC109400860	0.0474969	LOC120417151	0.0367737	CTRY011751	0.0955299
Down	LOC5563641	0.151315	LOC109400877	0.119512	LOC120415951	0.00609508	CTRY011748	0.237924
Down	LOC5563644	0.219721	LOC109416756	0.180009	LOC120415921	0.0790329	CTRY011633	0.0158616
Down	LOC5563646	64.4644	LOC109416769	24.8423	LOC120415928	83.891	CTRY011632	23.3771
Down	LOC5563664	0.303713	LOC109412580	0.266507	LOC120426692	0.268184	CTRY002025	0.461247
Down	LOC5563667	0.0415629	LOC115267986	0.0426502	LOC120416689	0.00802519	CTRY008289	0.00666907
Down	LOC5563701	0.11722	LOC109433484	0.115521	LOC120432537	0.174116	CTRY008255	0.808399
Down	LOC5563706	0.246131	LOC109417128	0.299407	LOC120423968	0.134498	CTRY003243	0.219358
Down	LOC5563708	0.163005	LOC109424334	0.142263	LOC120421193	0.0447989	CTRY002622	0.0758832
Down	LOC5563713	0.0832341	LOC109417122	0.102976	LOC120423969	0.0414466	CTRY003244	0.0897621
Down	LOC5563717	0.0813941	LOC109417123	0.074752	LOC120423965	0.0943722	CTRY003239	0.0852559
Down	LOC5563763	0.224267	LOC109401304	0.0497776	LOC120421447	0.39425	CTRY006699	0.124549
Down	LOC5563780	0.156186	LOC109428106	0.10845	LOC120413783	0.0982324	CTRY012201	0.0885004
Down	LOC5563786	39.2143	LOC109428105	19.3728	LOC120414851	73.2823	CTRY012202	44.482
Down	LOC5563793	0.0844247	LOC109412678	0.0546813	LOC120419175	0.0742584	CTRY005011	0.0892213
Down	LOC5563812	0.158675	LOC109418350	0.153723	LOC120431732	0.0207233	CTRY012382	0.673035
Down	LOC5563827	0.189631	LOC109427043	0.0827916	LOC120422953	0.0414466	CTRY007641	0.215032
Down	LOC5563838	0.0718692	LOC109413527	0.121793	LOC120413497	0.197785	CTRY009688	0.135184
Down	LOC5563880	0.280442	LOC109403482	0.343654	LOC120420867	0.449004	CTRY001258	0.458183
Down	LOC5563882	0.487499	LOC109623344	0.499772	LOC120422942	0	CTRY007631	1.00739
Down	LOC5563894	0.146444	LOC109418868	0.00604402	LOC120426842	0.0174726	CTRY008735	0.0288392
Down	LOC5563904	0.700725	LOC109402267	0.256016	LOC128093113	0.335941	CTRY006876	0.457102
Down	LOC5563911	0.129235	LOC115257399	0.107994	LOC128093112	0.128606	CTRY006871	1.27812
Down	LOC5563914	0.0753328	LOC115257450	0.0473828	LOC128093110	0.0936611	CTRY006875	0.0461428
Down	LOC5563919	0.176318	LOC109407396	0.168833	LOC120418531	0.193113	CTRY010031	0.0975126
Down	LOC5563946	0.2155	LOC115254139	0.112784	LOC120427669	0.0879724	CTRY000488	0.0922855
Down	LOC5563955	0.111484	LOC109412243	0.124986	LOC120425656	0.122105	CTRY011037	0.145278
Down	LOC5563971	0.294404	LOC109406509	0.882484	LOC120425928	0.155323	CTRY011050	0.335076
Down	LOC5563984	0.179998	LOC109406543	0.208804	LOC120425931	0.240553	CTRY011053	0.192862
Down	LOC5564011	0.54573	LOC109427363	0.0730414	LOC120418035	0.430211	CTRY001206	0.197008
Down	LOC5564012	0.568893	LOC109402079	0.422739	LOC120418409	0.255282	CTRY001205	0.222603
Down	LOC5564019	1.52462	LOC109432671	0.0773178	LOC120415564	0.19677	CTRY004246	2.79722
Down	LOC5564020	0.0675398	LOC109427572	0.0441327	LOC120415567	0.0350467	CTRY004247	0.0418169
Down	LOC5564024	0.0546596	LOC109427574	0.0806249	LOC120415544	0.100366	CTRY004251	0.0481255
Down	LOC5564027	0.0947072	LOC109427575	0.139982	LOC120415547	0.408878	CTRY004252	0.167808
Down	LOC5564039	0.515748	LOC109427769	0.741476	LOC120430120	0.627489	CTRY001722	1.87473
Down	LOC5564041	1.29679	LOC109431348	0.576577	LOC120418066	0.656948	CTRY001715	0.442141
Down	LOC5564047	2.24169	LOC134285223	1.7815	LOC120425030	1.04785	CTRY001624	3.36464
Down	LOC5564055	0.114623	LOC109427760	0.139982	LOC120430118	0.149837	CTRY001716	0.282444
Down	LOC5564056	1.45351	LOC109431389	1.66604	LOC120419865	0.547846	CTRY001704	0.610851
Down	LOC5564058	0.307501	LOC109427777	0.290569	LOC120425019	0.317351	CTRY001623	0.496575
Down	LOC5564065	0.269401	LOC109431398	0.420287	LOC120418083	0.0244819	CTRY001703	0.0454218
Down	LOC5564072	1.18433	LOC115260703	1.1824	LOC120425024	0.463937	CTRY001626	6.87942
Down	LOC5564073	0.024245	LOC115260705	0.0199567	LOC120425012	0.00792361	CTRY001627	0.0416366
Down	LOC5564087	0.135513	LOC109397769	0.161421	LOC120421350	0.125457	CTRY006135	0.44863
Down	LOC5564091	0.233792	LOC109408928	0.246892	LOC120419272	1.75945	CTRY001402	2.23973
Down	LOC5564107	0.0427535	LOC115268390	0.0439047	LOC120428936	0.00355547	CTRY008327	0.00324441
Down	LOC5564109	0.0819353	LOC109425953	0.0309043	LOC120428926	0.0950833	CTRY008332	0.135364
Down	LOC5564110	0.110077	LOC115254030	0.0889497	LOC120423793	0.0537383	CTRY008343	0.0255948
Down	LOC5564117	2.70159	LOC109407623	0.936424	LOC120428930	1.94789	CTRY008339	4.0283
Down	LOC5564118	0.665115	LOC115256953	1.96231	LOC120428927	0.161824	CTRY008336	1.55425
Down	LOC5564124	0.206408	LOC109407627	0.111073	LOC120428923	0.0894961	CTRY008338	0.370584
Down	LOC5564130	0.143306	LOC109407629	0.370966	LOC120428924	0.232121	CTRY008333	0.159517
Down	LOC5564133	1.59898	LOC109407632	1.18531	LOC120428925	1.37038	CTRY008331	3.93962
Down	LOC5564140	0.0620197	LOC109407611	0.053826	LOC120423881	0.0145266	CTRY008358	0.144737
Down	LOC5564151	0.129343	LOC109422130	0.0917436	LOC120413371	0.114791	CTRY001540	0.193403
Down	LOC5564161	3.32763	LOC109407834	0.488995	LOC120415677	1.34945	CTRY005853	6.05443
Down	LOC5564177	0.134214	LOC109420062	0.0105485	LOC120415693	0.412942	CTRY005852	0.0571377
Down	LOC5564179	0.318649	LOC115254042	0.386703	LOC120414427	0.468102	CTRY011388	0.660598
Down	LOC5564181	0.17556	LOC109422647	0.095678	LOC120424392	0.179907	CTRY011181	0.0499279
Down	LOC5564183	0.165494	LOC115260119	0.104345	LOC120414403	0.147603	CTRY011386	0.419611
Down	LOC5564185	0.413681	LOC109413806	0.211142	LOC120428436	0.218102	CTRY000213	0.70584
Down	LOC5564212	32.2985	LOC109621247	12.268	LOC120420076	33.2881	CTRY009438	25.9402
Down	LOC5564225	0.281199	LOC109403769	0.337154	LOC120419963	0.399533	CTRY010244	0.489005
Down	LOC5564231	0.31248	LOC109403775	0.601665	LOC120419961	1.05079	CTRY010248	0.536229
Down	LOC5564232	0.138651	LOC109403770	0.129091	LOC120419965	0.0893946	CTRY010245	0.129957
Down	LOC5564236	0.122199	LOC109403759	0.418121	LOC120417998	0.000203169	CTRY006528	0.000180245
Down	LOC5564242	0.60342	LOC109622612	4.76485	LOC120413674	0.168224	CTRY000317	0.00739005
Down	LOC5564249	0.371144	LOC109431166	0.44395	LOC120413710	0.407152	CTRY001321	0.102199
Down	LOC5564255	0.106397	LOC109431170	0.152583	LOC120413708	0.0901056	CTRY001322	1.18115
Down	LOC5564272	0.134538	LOC115268465	0.155833	LOC120417539	0.103515	CTRY011717	0.10995
Down	LOC5564296	0.49356	LOC109425687	0.8749	LOC120424452	0	CTRY006945	1.62239
Down	LOC5564317	0.268319	LOC109406083	0.247862	LOC120419981	0.21922	CTRY010238	0.460707
Down	LOC5564337	30.2758	LOC115263581	42.6914	LOC120417316	0.0204185	CTRY011594	0.0863374
Down	LOC5564363	0.353826	LOC109432682	0.0153381	LOC120430841	0.250305	CTRY007822	0.847152
Down	LOC5564379	0.18476	LOC109405422	0.139355	LOC120428015	0.289313	CTRY003161	0.104182
Down	LOC5564381	0.0391817	LOC115257288	0.197514	LOC120424606	0.0947785	CTRY003158	0.0656092
Down	LOC5564392	0.955082	LOC109413004	1.28333	LOC120414529	0.399025	CTRY001128	0.686013
Down	LOC5564399	0.664358	LOC109402216	0.345878	LOC120417697	0.383584	CTRY001129	0.184931
Down	LOC5564400	0.153696	LOC109412996	0.0676246	LOC120417677	0.0953881	CTRY001133	0.0748017
Down	LOC5564404	0.0950319	LOC109402235	0.19586	LOC120417683	0.00243803	CTRY001136	0.238464
Down	LOC5564429	0.129235	LOC109412338	0.113297	LOC120413007	0.243499	CTRY011341	0.00847152
Down	LOC5564469	1.02176	LOC109404943	0.279906	LOC120418023	0.540329	CTRY009715	3.72278
Down	LOC5564477	1.10661	LOC109420918	0.54687	LOC120431110	0.0759854	CTRY005599	1.01532
Down	LOC5564483	0.0549843	LOC109425082	0.0706466	LOC120431577	0.0176757	CTRY005355	0.0740808
Down	LOC5564487	0.367464	LOC109425135	0.599783	LOC120413129	0.120581	CTRY005544	0.239546
Down	LOC5564504	0.0823682	LOC109425141	0.0370624	LOC120413136	0.137444	CTRY005537	0.108508
Down	LOC5564507	0.090486	LOC109429414	0.0343255	LOC120413139	0.0172694	CTRY005539	0.0434391
Down	LOC5564509	0.205866	LOC109425132	0.357795	LOC120428532	0.126473	CTRY005352	0.209084
Down	LOC5564510	0.0627774	LOC109429398	0.378606	LOC120424959	0.0262089	CTRY005356	0.019827
Down	LOC5564516	3.67886	LOC109623132	0.740563	LOC120413623	3.09315	CTRY005208	1.12888
Down	LOC5564517	0.257495	LOC109417965	0.12835	LOC120421541	0.34935	CTRY009412	0.20602
Down	LOC5564524	0.106613	LOC109398278	0.0618657	LOC120412678	0.095896	CTRY003702	0.18403
Down	LOC5564525	0.364975	LOC109429796	0.145285	LOC120412679	0.201341	CTRY003701	0.298666
Down	LOC5564530	0.178699	LOC115253814	0.0205839	LOC120416266	0.0250914	CTRY004819	0.27974
Down	LOC5564541	0.418011	LOC109427547	0.363325	LOC120426262	0.62759	CTRY005706	1.71593
Down	LOC5564542	0.446044	LOC115254943	0.553997	LOC120422617	0.658269	CTRY005705	1.43547
Down	LOC5564545	0.316051	LOC109427525	0.444406	LOC120430859	0.377489	CTRY005712	0.432588
Down	LOC5564549	0.2615	LOC109410428	0.00273691	LOC120417652	0.143539	CTRY012478	0
Down	LOC5564552	0.210196	LOC115254143	0.00057019	LOC120417656	0.107375	CTRY012474	0.360851
Down	LOC5564563	0.117004	LOC109398004	0.204812	LOC120420045	0.409894	CTRY010639	0.422314
Down	LOC5564577	0.227406	LOC109402140	0.383396	LOC120420268	0.0046729	CTRY007264	0.0423576
Down	LOC5564581	0.464228	LOC109426436	0.24159	LOC120426517	1.30922	CTRY007252	1.21467
Down	LOC5564584	0.436952	LOC109402150	0.264568	LOC120426912	0	CTRY007097	1.24694
Down	LOC5564588	0.135729	LOC109426459	0.0825066	LOC120415858	0.0810646	CTRY007857	0.230894
Down	LOC5564589	0.204676	LOC109404018	0.100182	LOC120426514	0.0659285	CTRY007253	0.466655
Down	LOC5564593	0.113757	LOC109402134	0.113411	LOC120415874	0.0604429	CTRY007865	0.544881
Down	LOC5564604	0.153047	LOC109399052	0.138385	LOC120424264	0.178891	CTRY002745	0.100036
Down	LOC5564606	0.183137	LOC109411874	0.0973315	LOC120424257	0.147806	CTRY002746	0.167267
Down	LOC5564609	3.80712	LOC109405229	0.0638043	LOC120425390	0.407355	CTRY002728	5.93926
Down	LOC5564618	0.0966555	LOC109622152	0.119569	LOC120424366	0.00639984	CTRY004605	0.170872
Down	LOC5564627	0.70473	LOC109410014	0.417322	LOC120428820	0.581268	CTRY008956	0.528118
Down	LOC5564636	1.91449	LOC109411708	1.41487	LOC120419223	2.02235	CTRY011990	3.85472
Down	LOC5564673	0.110293	LOC109412650	0.0762915	LOC120420601	0	CTRY005182	0.465753
Down	LOC5564681	0.106289	LOC109399005	0.053883	LOC120429283	0.151768	CTRY001967	0.348414
Down	LOC5564686	0.189956	LOC134284886	0.0141977	LOC120416396	0.0432751	CTRY000786	0.0798486
Down	LOC5564713	62.7375	LOC109428462	36.1294	LOC120432237	80.1586	CTRY000160	83.5461
Down	LOC5564718	0.11722	LOC115256196	0.00410537	LOC120426789	0.00193011	CTRY009068	0.000720981
Down	LOC5564723	0.0925425	LOC109412921	0.0934542	LOC120420374	0.105039	CTRY006591	0.12527
Down	LOC5564731	0.0572573	LOC109418691	0.0904892	LOC120420375	0.0723283	CTRY006590	0.205119
Down	LOC5564732	0.0976296	LOC115257682	0.304026	LOC120420379	0.804653	CTRY006588	0.038212
Down	LOC5564753	0.119602	LOC134283913	0.0632341	LOC120426506	0	CTRY007241	0.259553
Down	LOC5564768	1.4507	LOC109417152	0.607652	LOC120423161	0.0108696	CTRY006101	1.09751
Down	LOC5564769	0.455785	LOC109424556	0.181321	LOC120423156	0.200935	CTRY006092	0.486662
Down	LOC5564775	0.0947072	LOC115253431	0.0367203	LOC120419398	0.162637	CTRY006086	0.651586
Down	LOC5564781	0.292997	LOC109424554	0.249458	LOC120423155	0.114486	CTRY006093	0.157174
Down	LOC5564782	0.260634	LOC109424529	0.135021	LOC120419429	0.337058	CTRY006077	0.257931
Down	LOC5564787	0.304687	LOC109417150	0.120196	LOC120423163	0.0129013	CTRY006099	0.182769
Down	LOC5564792	0.213227	LOC109411982	0.257441	LOC120423151	0.136225	CTRY006091	0.258291
Down	LOC5564798	3.36313	LOC115269424	3.88345	LOC120424117	0.281187	CTRY006115	4.18295
Down	LOC5564809	0.303929	LOC109397080	0.395427	LOC120426701	0.160809	CTRY002016	0.342826
Down	LOC5564821	0.847494	LOC109406346	2.14095	LOC120421373	0.000101585	CTRY001198	0.00144196
Down	LOC5564842	0.181188	LOC109419322	0.101551	LOC120424983	0.282304	CTRY003779	0.33057
Down	LOC5564858	0.304037	LOC134291462	0.124986	LOC120419578	0.722877	CTRY006144	0.486662
Down	LOC5564860	0.502219	LOC109409570	0.700707	LOC120417502	1.44911	CTRY011711	0.725306
Down	LOC5564874	1.22968	LOC134291440	0.11113	LOC120419582	0.0211296	CTRY006143	0.401226
Down	LOC5564895	0.458924	LOC109430831	0.627324	LOC120414476	0.948903	CTRY009972	1.14077
Down	LOC5564902	0.126637	LOC115263201	0.130289	LOC120414447	0	CTRY009969	0.0803893
Down	LOC5564916	0.350579	LOC109428409	0.465503	LOC120419350	0.232731	CTRY001237	0.419971
Down	LOC5564917	0.251975	LOC109428408	0.217642	LOC120422391	0.134803	CTRY001239	0.622567
Down	LOC5564921	8.37125	LOC109429586	7.59266	LOC120423393	2.47156	CTRY003647	2.19737
Down	LOC5564922	0.065375	LOC109408552	0.116661	LOC120423405	0.0480496	CTRY003646	0.141673
Down	LOC5564923	0.10802	LOC109429583	0.135534	LOC120423398	0.0295612	CTRY003648	0.27235
Down	LOC5564925	3.65483	LOC109426506	1.61729	LOC120423392	1.13876	CTRY003652	1.20656
Down	LOC5564929	0.135513	LOC115262101	0.0590147	LOC120417298	0.00721252	CTRY003630	0.000180245
Down	LOC5564934	0.319948	LOC109408545	0.0855286	LOC120423407	0.0442909	CTRY003641	0.114816
Down	LOC5564938	0.120576	LOC109426524	0.0967613	LOC120423400	0.0522145	CTRY003651	0.0574982
Down	LOC5564942	0.154995	LOC115264896	0.151728	LOC120423387	1.01524	CTRY003644	0.428262
Down	LOC5564956	0.293971	LOC109428436	0.0872391	LOC120412427	0.173913	CTRY000815	0.425559
Down	LOC5564957	0.324386	LOC109428439	0.288973	LOC120412926	0.669443	CTRY000816	0.41907
Down	LOC5564962	0.82747	LOC115253842	1.37752	LOC120413234	0.780882	CTRY009753	1.65429
Down	LOC5564975	0.0907025	LOC109397520	0.0421941	LOC120427331	0.0573954	CTRY004761	0.0773252
Down	LOC5564976	0.376772	LOC109397530	1.03666	LOC120430190	0.335941	CTRY005831	0.812365
Down	LOC5564979	0.0476242	LOC109397521	0.121508	LOC120427326	0.00629825	CTRY004759	0.0975126
Down	LOC5565000	0.0878883	LOC115258755	0.0581594	LOC120430191	0.04551	CTRY005832	0.0189257
Down	LOC5565048	1.08194	LOC109406923	0.33875	LOC120425481	0.453068	CTRY001853	1.56669
Down	LOC5565050	0.223509	LOC109430936	0.141977	LOC120428781	0.0980293	CTRY001846	0.22062
Down	LOC5565060	1.19255	LOC109406929	0.891892	LOC120425499	1.75782	CTRY001855	1.38518
Down	LOC5565066	0.0609373	LOC109406934	0.017904	LOC120425482	0.0710077	CTRY001852	0.148162
Down	LOC5565077	0.0874554	LOC109429799	0.0761774	LOC120412675	0.0279358	CTRY003703	0.0854362
Down	LOC5565083	0.332395	LOC109405207	0.274661	LOC120425368	0.443824	CTRY002724	0.518205
Down	LOC5565084	0.215391	LOC109415237	0.0582164	LOC120432256	0.0105648	CTRY000440	0.11734
Down	LOC5565097	0.0649421	LOC109399283	0.140096	LOC120414214	0.266355	CTRY010449	0.135905
Down	LOC5565108	0.817837	LOC109399284	0.13103	LOC120414203	0.11215	CTRY010448	0.231074
Down	LOC5565148	0.454811	LOC109413335	0.254134	LOC120432052	0.132873	CTRY002832	0.582372
Down	LOC5565156	1.78883	LOC109432057	2.84964	LOC120432082	0.0200122	CTRY002165	8.1168
Down	LOC5565159	0.207057	LOC109432062	0.214848	LOC120423560	0.222775	CTRY002658	0.255948
Down	LOC5565195	0.0537937	LOC109428481	0.0797696	LOC120432297	0.0885819	CTRY000303	0.0221701
Down	LOC5565203	0.0531443	LOC109420361	0.129148	LOC120431768	0.0618651	CTRY006817	0.627794
Down	LOC5565215	0.247862	LOC109406422	0.143745	LOC120424795	0.0231613	CTRY010390	0.0794881
Down	LOC5565217	0.248836	LOC109420362	0.1117	LOC120414241	0.304856	CTRY006819	0.297585
Down	LOC5565227	0.0890789	LOC109406421	0.0557076	LOC120424794	0.122206	CTRY010387	0.0834535
Down	LOC5565228	0.173937	LOC109406424	0.188562	LOC120418881	0.0522145	CTRY009089	0.0827325
Down	LOC5565229	0.109969	LOC109420360	0.0589577	LOC120431767	0	CTRY006816	0.0546143
Down	LOC5565237	0.107587	LOC115259484	0.209773	LOC120418352	0.038399	CTRY003260	0.421774
Down	LOC5565249	0.126637	LOC109623154	0.0797696	LOC120413617	0.0728362	CTRY005209	0.265141
Down	LOC5565253	0.570408	LOC115260692	0.327688	LOC120413206	0.172592	CTRY001277	1.7774
Down	LOC5565261	0.10867	LOC109431109	0.221177	LOC120427459	0.361946	CTRY001839	0.569034
Down	LOC5565266	0.538153	LOC109419656	0.00245182	LOC120429495	1.28027	CTRY001822	0.89726
Down	LOC5565270	1.0237	LOC109432379	1.47736	LOC120417029	1.76087	CTRY000725	2.98756
Down	LOC5565279	0.160623	LOC109405868	0.288174	LOC120420052	0.527225	CTRY004527	0.390952
Down	LOC5565282	0.343002	LOC109405866	0.454385	LOC120420510	0.23913	CTRY004531	0.312004
Down	LOC5565301	0.315943	LOC109419754	0.338522	LOC120423458	0	CTRY004630	0.0185652
Down	LOC5565307	0.423098	LOC109419757	0.105086	LOC120423472	0.0805567	CTRY004629	0.474766
Down	LOC5565337	0.227189	LOC109408825	0.138841	LOC120415405	0.19362	CTRY007394	0.0704759
Down	LOC5565346	0.074034	LOC109416209	0.156916	LOC120418552	0.125356	CTRY010035	0.136806
Down	LOC5565366	0.294188	LOC109400327	0.146254	LOC120417357	0.154206	CTRY005446	0.0935472
Down	LOC5565372	0.31432	LOC134287869	0.17807	LOC120424896	0.433564	CTRY005424	0.489005
Down	LOC5565399	0.0544431	LOC109400287	0.0785722	LOC120424905	0.0943722	CTRY005428	0.0144196
Down	LOC5565405	9.00455	LOC109407918	2.32541	LOC120413220	4.01991	CTRY009757	13.1532
Down	LOC5565408	0.0794458	LOC109404190	0.00421941	LOC120426971	0.0155425	CTRY010754	0.053713
Down	LOC5565432	0.134214	LOC109426013	0.19261	LOC120416368	0.0249898	CTRY007910	0.145278
Down	LOC5565441	1.62756	LOC109426026	1.39018	LOC120422206	1.52276	CTRY007919	2.18745
Down	LOC5565442	0.0836671	LOC109426032	0.0872391	LOC120422213	0.135311	CTRY007925	0.0416366
Down	LOC5565447	0.185193	LOC109426039	0.147736	LOC120422214	0.246343	CTRY007930	0.0427181
Down	LOC5565452	0.434246	LOC109426045	0.0966473	LOC120422234	0.216477	CTRY007936	1.38302
Down	LOC5565453	1.46001	LOC109426035	5.57173	LOC120422211	1.88673	CTRY007927	4.15357
Down	LOC5565454	1.68168	LOC109426036	14.8239	LOC120422212	1.07903	CTRY007926	1.35707
Down	LOC5565474	52.8981	LOC115263538	3.31435	LOC128092880	0.00101585	CTRY006506	0.0174838
Down	LOC5565494	0.132049	LOC109418673	0.0683088	LOC120416200	0.0370784	CTRY006580	0.342826
Down	LOC5565497	0.096439	LOC109414787	0.0665412	LOC120416209	0.0614588	CTRY006577	0.0555155
Down	LOC5565513	0.249486	LOC109409788	0.115407	LOC120425495	0.409285	CTRY008871	0.894917
Down	LOC5565520	0.130534	LOC109401292	0.361159	LOC120428518	0.360118	CTRY006563	0.879957
Down	LOC5565534	0.0582314	LOC134288878	0.0433345	LOC120428828	0.0647095	CTRY009329	0.0922855
Down	LOC5565544	39.6313	LOC109413463	7.13035	LOC120416489	32.7077	CTRY009488	50.3518
Down	LOC5565549	0.0956814	LOC109413491	0.0513742	LOC120413437	0.0278342	CTRY009691	0.0268565
Down	LOC5565550	0.239312	LOC109414878	1.26696	LOC120416490	0.624949	CTRY009490	1.79092
Down	LOC5565563	0.148284	LOC115253479	0.153609	LOC120416488	0.0774076	CTRY009491	0.142754
Down	LOC5565589	2.87553	LOC109415927	2.04339	LOC120431859	2.54581	CTRY002647	4.82498
Down	LOC5565618	0.482628	LOC115257630	0.112042	LOC120424549	0.21729	CTRY005693	0.165105
Down	LOC5565619	0.288126	LOC109400996	0.294104	LOC120424565	0.161113	CTRY005692	0.16204
Down	LOC5565621	0.280766	LOC109403644	0.124359	LOC120413156	0.583909	CTRY009772	0.790555
Down	LOC5565629	0.757983	LOC109423532	0.903239	LOC120424232	3.20683	CTRY003005	4.12437
Down	LOC5565647	0.255114	LOC109397339	0.183202	LOC120415739	0.187119	CTRY010350	0.4708
Down	LOC5565652	0.61695	LOC109397340	0.356084	LOC120415735	0.937322	CTRY010354	0.589221
Down	LOC5565670	0.316268	LOC109415875	0.113012	LOC120416564	0.188236	CTRY010296	0.631759
Down	LOC5565682	0.0909189	LOC109416190	0.0605542	LOC120418290	0.137444	CTRY005667	0.231255
Down	LOC5565683	0.104557	LOC115257373	0.0555365	LOC120418295	0.0729378	CTRY005666	0.0976929
Down	LOC5565689	0.067648	LOC109398697	0.0557646	LOC120420574	0.0899025	CTRY004518	0.317592
Down	LOC5565690	0.125771	LOC109412354	0.0447029	LOC120418314	0	CTRY005662	0.0657895
Down	LOC5565699	0.353069	LOC134287965	0.309556	LOC120418303	0.000609508	CTRY005657	0.028659
Down	LOC5565700	5.55515	LOC109412353	1.73902	LOC120418286	6.81786	CTRY005665	2.42304
Down	LOC5565701	8.02814	LOC109411963	4.05246	LOC120423165	0.518793	CTRY006098	15.5339
Down	LOC5565728	0.0644009	LOC109428976	0.0102064	LOC120415434	0.0115807	CTRY007412	0.0091925
Down	LOC5565749	0.118195	LOC109414881	0.179724	LOC120416510	0.11794	CTRY009487	0.0618241
Down	LOC5565756	0.14796	LOC109415045	0.0854145	LOC120422727	0.0964039	CTRY004917	0.11752
Down	LOC5565765	0.377205	LOC109621948	0.207492	LOC120422945	0.149025	CTRY004912	0.417267
Down	LOC5565770	0.619981	LOC109621961	0.0346106	LOC120422559	0.0608493	CTRY004922	0.636986
Down	LOC5565782	0.104773	LOC109622588	0.0910594	LOC120422599	0.0899025	CTRY004915	0.334895
Down	LOC5565783	0.23325	LOC109621952	0.191128	LOC120422731	0.175945	CTRY004916	0.179885
Down	LOC5565805	0.0889707	LOC109428914	0.0361501	LOC120419301	0.155831	CTRY007427	0.262617
Down	LOC5565821	0.0792294	LOC109426115	0.0220664	LOC120427787	0.0345388	CTRY010622	0.229092
Down	LOC5565834	0.118086	LOC109429677	0.0697343	LOC120420514	0.0445957	CTRY003848	0.180786
Down	LOC5565836	0.421907	LOC109429695	0.0881514	LOC120420491	0.351788	CTRY003866	0.662581
Down	LOC5565841	0.117112	LOC115262073	0.0695632	LOC120420485	0.139476	CTRY003863	0.0578587
Down	LOC5565869	0.222102	LOC109429097	0.210685	LOC120418965	0.47562	CTRY005067	0.556777
Down	LOC5565878	1.13843	LOC109429927	0.562094	LOC120426277	0.827204	CTRY003897	1.35887
Down	LOC5565883	0.225782	LOC115262131	0.177842	LOC120412659	0.293885	CTRY003679	0.00342466
Down	LOC5565891	0.671934	LOC109429540	0.460258	LOC120412483	0.168427	CTRY003564	0.68385
Down	LOC5565896	0.196666	LOC109429550	0.287262	LOC120412654	0.0266152	CTRY003689	0.215393
Down	LOC5565921	0.0954649	LOC109429543	0.0196146	LOC120412462	0.236489	CTRY003563	2.48486
Down	LOC5565922	0.482736	LOC109429544	0.126012	LOC120412468	0.22948	CTRY003562	0.126172
Down	LOC5565930	0.224483	LOC109414612	0.219751	LOC120420755	0.0571922	CTRY003333	0.125451
Down	LOC5565931	1.43371	LOC109414609	1.14443	LOC120420757	1.14994	CTRY003334	0.916907
Down	LOC5565955	0.318757	LOC115264212	0.464534	LOC120420744	1.33076	CTRY003353	1.73324
Down	LOC5565962	42.8543	LOC109423643	12.4906	LOC120419715	1.19362	CTRY012002	25.1662
Down	LOC5565978	0.0507631	LOC134290262	0.044874	LOC120423903	0.358086	CTRY012307	1.05822
Down	LOC5565981	0.121658	LOC115270899	0.142719	LOC120423837	0.131959	CTRY012312	0.497116
Down	LOC5565992	0.0774976	LOC115264342	0.105086	LOC120417102	0.125051	CTRY003418	0.0827325
Down	LOC5566009	0.339972	LOC109398065	0.138271	LOC120425134	0.0810646	CTRY010612	0.1031
Down	LOC5566024	0.0150449	LOC109398012	0.0273691	LOC120422281	0.0153393	CTRY010599	0.0412761
Down	LOC5566028	0.198073	LOC109426302	0.370624	LOC120425132	0.0351483	CTRY010613	0.170872
Down	LOC5566037	0.00129884	LOC109415637	0.0266849	LOC120412584	0.0171678	CTRY000942	0
Down	LOC5566038	0.0492478	LOC134285180	0.0705896	LOC120412545	0.0369768	CTRY000939	0.10292
Down	LOC5566052	0.202403	LOC109400777	0.0134565	LOC120421970	0.00893946	CTRY008099	0.00739005
Down	LOC5566055	0.265938	LOC109399622	0.185597	LOC120425960	0.372105	CTRY008090	0.309481
Down	LOC5566059	2.53025	LOC109400800	2.98375	LOC120425962	2.10738	CTRY008089	8.38645
Down	LOC5566079	2.52224	LOC109424859	3.17146	LOC120427658	0.211499	CTRY001744	5.7527
Down	LOC5566081	0.176967	LOC109423177	0.310868	LOC120426015	0.101382	CTRY002299	0.0847152
Down	LOC5566087	3.32882	LOC109427648	1.14454	LOC120426437	1.43041	CTRY001659	8.82624
Down	LOC5566095	0.21853	LOC115266664	0.17847	LOC120431855	0.149939	CTRY002945	0.160238
Down	LOC5566097	0.0597467	LOC115266637	0.0614665	LOC120431712	0.0481512	CTRY002946	0.121846
Down	LOC5566102	0.195692	LOC134288053	0.00153951	LOC120420907	0.0686713	CTRY010158	0.381218
Down	LOC5566106	0.107912	LOC109409650	0.0888927	LOC120428066	0.107578	CTRY008446	0.121846
Down	LOC5566119	0.466501	LOC109409682	0.52161	LOC120430974	0.678992	CTRY008460	1.41096
Down	LOC5566123	0.0926507	LOC115265366	0.0641464	LOC120428064	0.265441	CTRY008454	0.0910238
Down	LOC5566126	0.0819353	LOC109406056	0.0671114	LOC120430975	0.140085	CTRY004155	0
Down	LOC5566142	0.33272	LOC109409668	0.131486	LOC120428067	0.117026	CTRY008456	0.289293
Down	LOC5566143	1.42082	LOC109417297	0.625442	LOC120428073	1.14699	CTRY008455	1.00126
Down	LOC5566157	0.0917848	LOC115254178	0.074923	LOC120414760	0.0779155	CTRY012019	0.063266
Down	LOC5566166	0.627232	LOC115254176	1.16684	LOC120414095	3.96455	CTRY012026	3.27577
Down	LOC5566167	0.153805	LOC109415782	0.150017	LOC120415202	0.186306	CTRY012027	0.568673
Down	LOC5566185	0.121875	LOC109623281	0.0329	LOC120427531	0.146688	CTRY006706	0.508652
Down	LOC5566214	0.13259	LOC109420228	0.148078	LOC120429650	0.0872613	CTRY012066	0.000180245
Down	LOC5566220	7.38045	LOC115265746	5.83721	LOC120429967	15.6879	CTRY009020	2.29488
Down	LOC5566228	48.6983	LOC115255627	11.5628	LOC120421054	45.9915	CTRY000360	36.447
Down	LOC5566229	0.280983	LOC109405359	0.112213	LOC120422061	0.181837	CTRY000376	0.238645
Down	LOC5566232	0.240178	LOC109420223	0.257327	LOC120429984	0.352093	CTRY009018	0.520548
Down	LOC5566233	0.299167	LOC109420222	0.0737256	LOC120430176	0.197074	CTRY009017	0.737383
Down	LOC5566237	0.231735	LOC109420220	0.136846	LOC120420570	0.303637	CTRY009015	0.175739
Down	LOC5566238	0.120143	LOC109397815	0.13924	LOC120421069	0.129622	CTRY000358	0.142033
Down	LOC5566265	0.143306	LOC109418949	0.0721291	LOC120432628	0.0926453	CTRY008777	0.00576784
Down	LOC5566298	0.695422	LOC109407766	0.0522294	LOC120424385	0.383076	CTRY008755	0.722242
Down	LOC5566301	3.89653	LOC109397421	4.96305	LOC120430231	5.33929	CTRY007488	5.72729
Down	LOC5566309	0.206624	LOC109412776	0.20219	LOC120424465	0.289212	CTRY007503	0.386986
Down	LOC5566316	1.13843	LOC109397407	0.171456	LOC128092282	0.127082	CTRY007480	0.0594809
Down	LOC5566344	0.132807	LOC109419671	0.13867	LOC120429619	0.0906136	CTRY008949	0.386806
Down	LOC5566353	0.590324	LOC109411286	0.25727	LOC120423189	0.658472	CTRY004899	0.350937
Down	LOC5566357	0.102176	LOC109411282	0.116889	LOC120422834	0.139781	CTRY004896	0.29398
Down	LOC5566370	0.442905	LOC109426199	0.506956	LOC120418692	0.584722	CTRY012106	0.445205
Down	LOC5566371	0.123931	LOC109419134	0.136447	LOC120418668	0.131857	CTRY012105	0.635725
Down	LOC5566373	0.48804	LOC115261548	0.962938	LOC120426756	0.264831	CTRY012108	1.03461
Down	LOC5566415	0.107046	LOC109421935	0.13599	LOC120419150	0.153088	CTRY007815	0.0472242
Down	LOC5566416	0.0684057	LOC109421938	0.0726993	LOC120419156	0.176249	CTRY007813	0.575342
Down	LOC5566450	0.235199	LOC109400980	0.335329	LOC120424570	1.04388	CTRY005686	0.928623
Down	LOC5566457	10.1012	LOC109398470	24.7996	LOC120429166	0	CTRY002415	1.76658
Down	LOC5566478	0.11235	LOC109429298	0.0790284	LOC120421015	0.159386	CTRY002396	0.156092
Down	LOC5566513	0.0649421	LOC109413726	0.14671	LOC120416305	0.106156	CTRY005380	0.101298
Down	LOC5566520	0.611538	LOC109429374	0.268389	LOC120416323	0.34742	CTRY005373	0.434211
Down	LOC5566521	0.121333	LOC109429376	0.0458433	LOC120416296	0.038399	CTRY005372	0.134463
Down	LOC5566526	0.172638	LOC109409615	0.0707036	LOC120413111	0.123933	CTRY005549	0.391132
Down	LOC5566531	0.0443771	LOC109431130	0.0189303	LOC120413289	0.0346404	CTRY000250	0.0277578
Down	LOC5566532	0.48555	LOC109424261	0.121907	LOC120431192	0.56156	CTRY005898	0.283165
Down	LOC5566550	0.0704622	LOC109410666	0.021097	LOC120432548	0.014933	CTRY008238	0.0230714
Down	LOC5566564	0.0903778	LOC109411331	0.113183	LOC120419997	0.0864486	CTRY011867	0.299928
Down	LOC5566585	0.377963	LOC109420345	0.229388	LOC120414870	0.153596	CTRY006606	0.436914
Down	LOC5566589	0.130209	LOC115257360	0.143745	LOC120416760	0.0511987	CTRY006912	0.142574
Down	LOC5566596	0.355774	LOC109420330	0.236116	LOC120427529	0.435798	CTRY006713	1.13428
Down	LOC5566608	0.513908	LOC115258006	0.667921	LOC120420438	0.224705	CTRY006722	1.36301
Down	LOC5566610	0.183678	LOC109418842	0.159083	LOC120420423	0.0939659	CTRY006724	0.590123
Down	LOC5566613	0.855287	LOC109401438	3.63246	LOC120421116	0.51412	CTRY005294	2.85436
Down	LOC5566650	0.119169	LOC109621576	0.269187	LOC120422575	0.259549	CTRY002841	0.269647
Down	LOC5566651	0.347765	LOC134287788	0.296043	LOC120431913	0.290126	CTRY001802	0.216655
Down	LOC5566654	0.447126	LOC109416331	0.850781	LOC120428957	0	CTRY001808	1.75775
Down	LOC5566677	0.661111	LOC109415352	0.88465	LOC120419710	0.150752	CTRY011999	0.291817
Down	LOC5566678	0.200022	LOC109423625	0.162675	LOC120424005	0.178281	CTRY012001	0.600937
Down	LOC5566684	0.69921	LOC115262185	0.792394	LOC120414339	0.722369	CTRY012675	1.01893
Down	LOC5566686	0.061262	LOC109407579	0.062892	LOC120428253	0.0193011	CTRY008406	0.0538933
Down	LOC5566687	2.22935	LOC109407580	0.969096	LOC120423891	0.905628	CTRY008373	1.81507
Down	LOC5566691	0.117329	LOC115253866	0.0558787	LOC120423905	0.013206	CTRY008371	0.193583
Down	LOC5566694	0.139626	LOC109407584	0.100696	LOC120423890	0.187525	CTRY008368	0.545422
Down	LOC5566703	0.0829094	LOC109425913	0.202532	LOC120423892	0.125863	CTRY008363	0.318313
Down	LOC5566723	0.388137	LOC109622566	0.328373	LOC120424170	0.320297	CTRY008853	0.221521
Down	LOC5566731	0.14363	LOC115261213	0.0575892	LOC120419360	0.0420561	CTRY011113	0.27217
Down	LOC5566751	0.739149	LOC115253966	0.291938	LOC120413336	0.65258	CTRY001506	0.575703
Down	LOC5566763	0.194718	LOC109425656	0.163303	LOC120425053	0.184986	CTRY006358	0.0454218
Down	LOC5566772	60.2948	LOC109397884	18.5078	LOC120424308	67.7283	CTRY000040	63.4998
Down	LOC5566785	0.0673233	LOC109422845	0.000399133	LOC120413921	0	CTRY011206	0.0019827
Down	LOC5566793	0.296677	LOC109398022	0.304425	LOC120422288	0.462617	CTRY010605	0.593006
Down	LOC5566799	0.224591	LOC115254978	0.0704755	LOC120418609	0.065319	CTRY004852	0.0910238
Down	LOC5566800	1.3693	LOC109402109	0.882769	LOC120419835	0.275295	CTRY004781	3.45368
Down	LOC5566804	0.115922	LOC109402101	0.0934542	LOC120418596	0.0454084	CTRY004849	0.053713
Down	LOC5566808	0.208139	LOC115254988	0.148763	LOC120418610	0.119972	CTRY004845	0.053713
Down	LOC5566810	0.122091	LOC109402115	0.0817083	LOC120418608	0.135209	CTRY004844	0.0174838
Down	LOC5566824	1.42505	LOC109423129	0.979074	LOC120414616	0.418732	CTRY010540	1.50811
Down	LOC5566827	0.0608291	LOC109425681	0.0734975	LOC120414621	0.102093	CTRY010546	0.120584
Down	LOC5566864	0.926399	LOC109408984	0.198255	LOC120421877	0.199716	CTRY007116	0.246035
Down	LOC5566868	0.19212	LOC109408999	0.10788	LOC128092904	0.00700935	CTRY007121	0.00036049
Down	LOC5566869	0.0494642	LOC109426467	0.0827916	LOC120421873	0.0532304	CTRY007120	0.454218
Down	LOC5566875	0.173828	LOC109426510	0.0620367	LOC120416990	0.0580049	CTRY007135	0.147981
Down	LOC5566877	0.283905	LOC109426511	0.0660851	LOC120416999	0.11347	CTRY007136	0.785328
Down	LOC5566888	0.268427	LOC109622066	0.137701	LOC120413787	0.377082	CTRY011553	1.75973
Down	LOC5566900	0.0526031	LOC115253958	0.0560497	LOC120417006	0.0972166	CTRY007138	0.118241
Down	LOC5566901	0.277627	LOC109408356	0.63103	LOC120416993	0.462922	CTRY007139	1.28118
Down	LOC5566910	0.174911	LOC109421022	0.0683088	LOC120425195	0	CTRY004965	0.0504686
Down	LOC5566935	0.142548	LOC109433368	0.180921	LOC120417329	0.171069	CTRY011600	0.0863374
Down	LOC5566936	0.378937	LOC109433363	0.341373	LOC120417336	0.238216	CTRY011599	0.240087
Down	LOC5566946	0.1314	LOC109422772	0.101209	LOC120429940	0.14232	CTRY000407	0.209625
Down	LOC5566973	0.328823	LOC109402499	0.106512	LOC120414587	0.0920358	CTRY004168	0.160598
Down	LOC5566977	0.456435	LOC109621383	0.50439	LOC120414545	0.605547	CTRY004171	0.171233
Down	LOC5566986	0.129235	LOC115268609	0.286977	LOC120414590	0.167208	CTRY004166	0.0376712
Down	LOC5567031	2.28455	LOC109433355	1.98073	LOC120421236	4.31989	CTRY011608	1.90501
Down	LOC5567037	0.357182	LOC109400911	0.222602	LOC120424516	0.257416	CTRY001574	0.151766
Down	LOC5567067	0.169174	LOC109410069	0.0533698	LOC120418750	0.416294	CTRY001937	1.11716
Down	LOC5567070	37.9749	LOC109410072	20.1741	LOC120416902	42.1102	CTRY002558	41.1031
Down	LOC5567072	0.122632	LOC109432118	0.0762915	LOC120429001	0.0290532	CTRY001908	0.0731795
Down	LOC5567073	0.203485	LOC109430360	0.161022	LOC120426741	0.159386	CTRY002351	0.369683
Down	LOC5567081	0.115705	LOC109430281	0.247976	LOC120428669	0.0409386	CTRY002347	0.283526
Down	LOC5567091	0.699318	LOC109406022	0.598187	LOC120413181	0.760158	CTRY009797	1.6013
Down	LOC5567097	0.428401	LOC109433624	1.62208	LOC120418112	0.327001	CTRY001413	1.85905
Down	LOC5567100	0.223293	LOC109415625	0.328829	LOC120412889	0.397095	CTRY000930	0.479092
Down	LOC5567109	0.480355	LOC109408930	0.289657	LOC120418104	0.560138	CTRY001410	0.731795
Down	LOC5567118	0.428401	LOC109399440	1.02138	LOC120422285	0.724807	CTRY010603	0.61752
Down	LOC5567125	0.121766	LOC115258162	0.0560497	LOC120422323	0.313795	CTRY008977	0.113194
Down	LOC5567126	0.268752	LOC109419650	0.192838	LOC120422319	0.311967	CTRY008976	0.594448
Down	LOC5567139	0.135837	LOC109410004	0.208804	LOC120422343	0	CTRY008968	0.171774
Down	LOC5567141	0.366815	LOC109410007	0.155662	LOC120422318	0.0651158	CTRY008967	0.118241
Down	LOC5567152	0.212144	LOC109429175	0.0594138	LOC120421399	0.102093	CTRY010954	0.375451
Down	LOC5567155	0.116246	LOC109398804	0.137017	LOC120421376	0.154307	CTRY010957	0.105804
Down	LOC5567158	0.0556337	LOC109429182	0.0660281	LOC120422255	0.0674523	CTRY010961	0.0445205
Down	LOC5567160	0.389761	LOC109398869	0.366861	LOC120422268	0.324462	CTRY010962	2.44539
Down	LOC5567162	0.226864	LOC109398834	0.200365	LOC120421712	0.262698	CTRY010963	0.403028
Down	LOC5567167	0.388246	LOC109429172	0.539799	LOC120422106	0.519809	CTRY010951	0.765141
Down	LOC5567194	2.27005	LOC109432313	1.18166	LOC120415390	0.0141203	CTRY007357	2.38482
Down	LOC5567207	0.404481	LOC109432293	0.0929981	LOC120415371	0.341629	CTRY007345	0.108688
Down	LOC5567214	0.345059	LOC134289566	0.0399704	LOC120426729	0.327103	CTRY007339	0.0182048
Down	LOC5567218	0.476459	LOC109397000	0.312521	LOC120428884	0.434681	CTRY007332	0.00234319
Down	LOC5567222	0.2431	LOC109432289	0.0492074	LOC120428789	0.241162	CTRY007330	0.421413
Down	LOC5567242	0.543565	LOC115267811	0.160737	LOC120429230	0.175945	CTRY007319	0.248558
Down	LOC5567254	0.0704622	LOC109424074	0.10406	LOC120413926	0.0780171	CTRY011192	0.187094
Down	LOC5567259	0.320489	LOC109416303	0.797582	LOC120413932	0.427164	CTRY011197	0.561824
Down	LOC5567260	0.311289	LOC109424067	0.245125	LOC120413950	0.419037	CTRY011198	0.327145
Down	LOC5567286	1.11138	LOC109413902	1.15817	LOC120427882	1.33533	CTRY001932	3.21179
Down	LOC5567305	0.312371	LOC109412613	0.125385	LOC120412527	0.158675	CTRY006250	0.40447
Down	LOC5567311	0.313995	LOC134287714	0.220607	LOC120416264	0.290126	CTRY004816	0.544881
Down	LOC5567313	0.142981	LOC109419965	0.029992	LOC120416281	0.011987	CTRY004820	0.0546143
Down	LOC5567322	0.15348	LOC109402818	0.199053	LOC120424400	0.141304	CTRY011167	0.138969
Down	LOC5567327	0.105639	LOC115264125	0.193808	LOC120424667	0.00487607	CTRY003143	0.0614636
Down	LOC5567341	71.0906	LOC109411771	38.8295	LOC120419075	1.20195	CTRY003464	12.8933
Down	LOC5567342	0.810477	LOC109421195	0.347987	LOC120419073	0.220439	CTRY003463	1.37617
Down	LOC5567351	0.0894036	LOC109421932	0.035865	LOC120419162	0.0488623	CTRY007549	0.0917448
Down	LOC5567358	0.143847	LOC109421940	0.16068	LOC120419165	0.155526	CTRY007812	0.256128
Down	LOC5567360	0.117978	LOC109421945	0.118029	LOC120415448	0.263511	CTRY007381	0.364636
Down	LOC5567367	0.149367	LOC109421952	0.0782871	LOC120412769	0.130028	CTRY007515	0.0149603
Down	LOC5567383	0.499838	LOC109427110	0.573384	LOC120432196	0.636631	CTRY011814	0.543619
Down	LOC5567396	2.70776	LOC109427107	2.12025	LOC120432162	5.75315	CTRY011818	0.215573
Down	LOC5567414	0.0969802	LOC109411581	0.0202988	LOC120432503	0.217391	CTRY002117	0.00432588
Down	LOC5567419	0.262041	LOC109430284	0.300034	LOC120420759	0.0830963	CTRY003329	0.0612833
Down	LOC5567421	0.0692716	LOC109430265	0.0451021	LOC120417203	0.177469	CTRY001944	0.127073
Down	LOC5567433	0.26767	LOC109397423	0.180807	LOC120415205	0.0836042	CTRY007675	0.182949
Down	LOC5567448	0.234549	LOC109397409	0.179325	LOC120415213	0.178688	CTRY007676	0.396359
Down	LOC5567461	0.0911354	LOC109403350	0.0595849	LOC120421565	0.0422592	CTRY008008	0.3385
Down	LOC5567464	0.30999	LOC109403358	0.30414	LOC120421568	0.198395	CTRY008006	0.891312
Down	LOC5567465	0.441065	LOC109403370	0.585472	LOC120416353	0.332792	CTRY007890	0.262437
Down	LOC5567467	0.0542266	LOC109403365	0.150758	LOC120416355	0.01859	CTRY007888	0.0108147
Down	LOC5567491	9.60526	LOC109622181	6.73783	LOC120425102	11.9201	CTRY008211	16.4075
Down	LOC5567494	1.34116	LOC109622277	0.822272	LOC120421840	0.770723	CTRY007873	0.322278
Down	LOC5567495	0.670202	LOC109622177	0.697286	LOC120421831	0.863267	CTRY007757	0.822819
Down	LOC5567500	0.276653	LOC109403475	0.241077	LOC120431247	0.15258	CTRY006473	0.328587
Down	LOC5567506	0.167334	LOC109414751	0.0402554	LOC120430963	0.0717188	CTRY002052	0.381759
Down	LOC5567528	0.51629	LOC109413668	0.470635	LOC120414438	0.282812	CTRY012087	0.326424
Down	LOC5567531	0.278493	LOC109413665	0.163816	LOC120414336	0.109407	CTRY012083	0.149063
Down	LOC5567537	0.0720857	LOC109415679	0.0974456	LOC120414343	0.089293	CTRY012078	0.121125
Down	LOC5567538	0.123174	LOC109425023	0.03883	LOC120423950	0.0567859	CTRY012303	0.105624
Down	LOC5567559	3.19223	LOC109413799	2.43112	LOC120413278	4.72013	CTRY000224	6.75198
Down	LOC5567565	0.882347	LOC109413801	1.0317	LOC120413276	1.86022	CTRY000222	3.78821
Down	LOC5567575	0.171122	LOC115253881	0.221462	LOC120428975	0.176961	CTRY011227	0.0834535
Down	LOC5567581	0.423314	LOC109424033	0.394743	LOC120413072	0.613978	CTRY011233	0.586518
Down	LOC5567582	0.110293	LOC109424032	0.0587866	LOC120413051	0.108797	CTRY011234	0.0596611
Down	LOC5567587	0.342461	LOC109424051	0.223914	LOC120413963	0.367534	CTRY011221	0.450793
Down	LOC5567614	0.0633185	LOC109425251	0.0367203	LOC120425385	0.0938643	CTRY002731	0.193223
Down	LOC5567623	0.1774	LOC109418134	0.011974	LOC120427495	0.0153393	CTRY008733	0.0373107
Down	LOC5567637	0.398636	LOC109418125	0.147907	LOC120426340	0.0819789	CTRY008889	0.208544
Down	LOC5567647	0.305336	LOC109418319	0.245125	LOC120415017	0.361032	CTRY012209	0.618421
Down	LOC5567648	0.0547678	LOC109418320	0.0531988	LOC120414126	0.0894961	CTRY012204	0.307678
Down	LOC5567651	0.0928672	LOC115269611	0.0551944	LOC120414689	0.176046	CTRY005919	0.340483
Down	LOC5567660	18.7592	LOC109416816	6.59123	LOC120417923	32.9275	CTRY001235	52.004
Down	LOC5567679	0.177508	LOC109416234	0.0412248	LOC120416973	0.0372816	CTRY011896	0.160238
Down	LOC5567684	1.16203	LOC109427053	0.685426	LOC120416972	0.326493	CTRY011892	1.02145
Down	LOC5567722	0.346791	LOC109422822	0.204698	LOC120416923	0.129927	CTRY000654	0.378515
Down	LOC5567743	0.339647	LOC109397492	0.618543	LOC120416081	0.159894	CTRY005267	0.0210887
Down	LOC5567757	0.0897283	LOC115253570	0.0403695	LOC120418479	0.0244819	CTRY009833	0.0812906
Down	LOC5567758	0.0938413	LOC109413844	0.039058	LOC120412894	0.0537383	CTRY009835	0.064708
Down	LOC5567769	1.19266	LOC109408864	0.0313605	LOC120422152	0.206522	CTRY003063	0.620224
Down	LOC5567772	0.102933	LOC109430404	0.0721291	LOC120422144	0.14425	CTRY003059	0.332012
Down	LOC5567783	0.069488	LOC109621569	0.0417379	LOC120421820	0.0328119	CTRY003043	0.0452415
Down	LOC5567789	0.196342	LOC109621636	0.0408256	LOC120421806	0.0568874	CTRY003039	0.0985941
Down	LOC5567791	0.489988	LOC109621608	0.0900901	LOC120421811	0.151361	CTRY003037	0.123648
Down	LOC5567793	1.01732	LOC109400116	0.863668	LOC120421810	1.24299	CTRY003035	2.47314
Down	LOC5567808	0.118628	LOC109420436	0.0769757	LOC120422999	0.0631857	CTRY008541	0.3531
Down	LOC5567819	0.067648	LOC109418366	0.000684229	LOC120419098	0.0802519	CTRY012404	0.14672
Down	LOC5567821	1.44756	LOC109418419	1.11484	LOC120419072	1.16812	CTRY012406	1.62203
Down	LOC5567835	0.141574	LOC109415608	0.00473258	LOC120427252	0.219525	CTRY002243	0.629055
Down	LOC5567836	0.270376	LOC109416910	0.247577	LOC120427265	0.272552	CTRY002244	0.317412
Down	LOC5567839	2.32265	LOC109415611	1.47611	LOC120427249	1.48974	CTRY002245	4.33219
Down	LOC5567843	0.127719	LOC115263952	0.020869	LOC120419119	0.0461195	CTRY012403	0.253064
Down	LOC5567853	0.15099	LOC109430545	0.0996693	LOC120422298	0.100874	CTRY009866	0.211608
Down	LOC5567854	0.0533608	LOC109430541	0.0490934	LOC120422293	0.0628809	CTRY009867	0.0991348
Down	LOC5567857	0.284122	LOC134284727	0.111187	LOC120423201	0.114994	CTRY012754	0.2062
Down	LOC5567858	0.260526	LOC134284463	0.151386	LOC120423203	0.190471	CTRY012753	0.328947
Down	LOC5567874	0.0620197	LOC109425978	0.0631771	LOC120416711	0.0203169	CTRY008297	0.0531723
Down	LOC5567908	0.126745	LOC109414063	0.155605	LOC120416425	0.291853	CTRY000751	0.298846
Down	LOC5567918	0.304687	LOC115256103	0.398449	LOC120416412	0.0664364	CTRY000759	0.0553353
Down	LOC5567921	0.0790129	LOC115256079	0	LOC120416430	0.00121902	CTRY000756	0.0156813
Down	LOC5567928	0.230977	LOC109414080	0.152925	LOC120429015	0.229581	CTRY001093	0.341384
Down	LOC5567931	0.127719	LOC115256111	0.0679097	LOC120427228	0.103108	CTRY001092	0.126712
Down	LOC5567933	0.051196	LOC109414079	0.0587296	LOC128092479	0.0039618	CTRY001094	0.094088
Down	LOC5567934	0.139301	LOC109414078	0.0439047	LOC120416435	0.0485575	CTRY000768	0.324982
Down	LOC5567945	0.0981708	LOC115264784	0.0493215	LOC120420851	0.0871597	CTRY006268	0.0778659
Down	LOC5567961	0.382725	LOC109421631	0.284183	LOC120422417	0.219118	CTRY004124	0.429524
Down	LOC5567962	0.221128	LOC115265592	0.156973	LOC120422390	0.156745	CTRY004122	0.311103
Down	LOC5567964	12.9957	LOC109407316	56.6061	LOC120422404	9.96861	CTRY008226	0.12491
Down	LOC5567972	0.129451	LOC109421638	0.107994	LOC120422403	0.0885819	CTRY004119	0.336337
Down	LOC5567987	0.115705	LOC109402498	0.104687	LOC120419463	0.0453068	CTRY003939	0.108327
Down	LOC5568014	0.171014	LOC109399358	0.165013	LOC120416641	0.216579	CTRY006183	0.264059
Down	LOC5568016	0.134214	LOC109399345	0.11324	LOC120416638	0.131959	CTRY006184	0.22062
Down	LOC5568019	0.189739	LOC109405647	0.281275	LOC120416657	0.281085	CTRY006186	0.180786
Down	LOC5568035	0.210737	LOC109428283	0.146767	LOC120426644	0.000304754	CTRY005974	0.167267
Down	LOC5568046	8.29051	LOC109421710	23.8953	LOC120416155	7.53698	CTRY012608	37.3385
Down	LOC5568070	0.127719	LOC109411690	0.0594138	LOC120417301	0.0331166	CTRY003525	0.428443
Down	LOC5568072	0.371144	LOC109411693	0.128578	LOC120427092	0.0196059	CTRY003521	0.249459
Down	LOC5568076	0.567486	LOC109411683	0.149561	LOC120417295	0.221963	CTRY003529	1.4526
Down	LOC5568081	0.534798	LOC109404622	0.542365	LOC120417288	0.68143	CTRY003536	1.47585
Down	LOC5568087	0.100985	LOC109404638	0.0924849	LOC120417313	0.259651	CTRY003543	0.608868
Down	LOC5568090	56.5558	LOC109416572	21.6047	LOC120417310	44.2813	CTRY003547	16.9092
Down	LOC5568096	0.107479	LOC109411691	0.021097	LOC120427088	0.0965055	CTRY003523	0.189438
Down	LOC5568098	0.202295	LOC109397934	0.173965	LOC120426872	0.194332	CTRY008711	0.293439
Down	LOC5568099	0.100444	LOC109418899	0.0895769	LOC120426825	0.0674523	CTRY008710	0.0317231
Down	LOC5568112	0.251218	LOC109398638	0.110731	LOC120422883	0.0778139	CTRY008600	0.238284
Down	LOC5568114	0.330014	LOC109419715	0.0734975	LOC120422882	0.118143	CTRY008598	0.0953497
Down	LOC5568120	0.177075	LOC109398227	0.0543962	LOC120425995	0.206826	CTRY008589	0.298125
Down	LOC5568127	0.3088	LOC109397944	0.0812521	LOC120427000	0.20256	CTRY008709	0.291637
Down	LOC5568141	0.252625	LOC109425692	0.226138	LOC120412582	0.213328	CTRY009372	0.341204
Down	LOC5568149	0.141574	LOC115264542	0.0362071	LOC120430394	0.0405323	CTRY012175	0.0510094
Down	LOC5568150	0.2799	LOC109415473	0.400787	LOC120430393	0.641508	CTRY012176	1.86968
Down	LOC5568166	0.919364	LOC109398308	0.438762	LOC120418691	0.363064	CTRY003746	1.60472
Down	LOC5568174	0.0646174	LOC109398331	0.224427	LOC120418706	0.00436814	CTRY003740	0.0347873
Down	LOC5568194	0.194935	LOC109429811	0.264397	LOC120412686	0.432954	CTRY003708	0.314888
Down	LOC5568195	0.171555	LOC109398302	0.146482	LOC120412687	0.507212	CTRY003707	0.135905
Down	LOC5568202	0.415521	LOC109420402	0.400958	LOC120421686	0.404307	CTRY006840	0.51442
Down	LOC5568211	4.09731	LOC109422743	3.25128	LOC120412944	4.36774	CTRY011310	7.45061
Down	LOC5568212	0.117545	LOC109422742	0.0303341	LOC120412972	0.0124949	CTRY011311	0.138428
Down	LOC5568213	0.11235	LOC109411912	0.121508	LOC120419408	0.142828	CTRY006069	0.0764239
Down	LOC5568218	0.183245	LOC109431864	0.00484662	LOC120412935	0.00142219	CTRY011305	0.00522711
Down	LOC5568222	0.223509	LOC109431878	0.346277	LOC120412965	0.31349	CTRY011303	0.778118
Down	LOC5568239	0.0851824	LOC109407226	0.0587866	LOC120419964	0.112657	CTRY004551	0.130678
Down	LOC5568245	0.0894036	LOC109405903	0.0728133	LOC120420553	0.00304754	CTRY004546	0.0488464
Down	LOC5568246	0.58686	LOC109405896	0.147565	LOC120419674	0.709264	CTRY004545	1.06038
Down	LOC5568255	13.5128	LOC109421140	7.90529	LOC120424080	0.982731	CTRY007102	7.88897
Down	LOC5568274	0.0947072	LOC115257176	0.0470407	LOC120425998	0.00101585	CTRY002297	0.00793078
Down	LOC5568279	0.191687	LOC115257160	0.183316	LOC120429002	0.138663	CTRY001907	0.766943
Down	LOC5568282	0.137569	LOC109423199	0.0642034	LOC120428999	0.052113	CTRY001905	0.218277
Down	LOC5568284	0.15283	LOC109397285	0.342228	LOC120426535	0.320906	CTRY001904	0.377073
Down	LOC5568291	0.254465	LOC109426594	0.207492	LOC120430317	0.0765949	CTRY010334	0.239005
Down	LOC5568292	0.57149	LOC109426592	0.255673	LOC120430316	0.445551	CTRY010335	0.991528
Down	LOC5568296	0.114731	LOC109426587	0.301118	LOC120426248	0.0645063	CTRY008891	0.315609
Down	LOC5568302	0.67897	LOC109410522	0.811096	LOC120430349	0.686611	CTRY009042	0.0493872
Down	LOC5568303	0.596168	LOC109426579	0.727449	LOC120428984	0.0386022	CTRY012634	0.0809301
Down	LOC5568319	0.350038	LOC109406578	0.111301	LOC120430112	0.125152	CTRY009026	0.106164
Down	LOC5568323	0.144063	LOC109427130	0.0287376	LOC120430400	0.133076	CTRY009029	0.0957102
Down	LOC5568325	0.2523	LOC134283998	0.0323868	LOC120430442	0.0419545	CTRY009041	0.122026
Down	LOC5568331	0.426561	LOC109428427	0.387159	LOC120421045	1.51615	CTRY000333	3.67249
Down	LOC5568333	0.0599632	LOC109428432	0.0263428	LOC120429205	0.0350467	CTRY001552	1.15609
Down	LOC5568339	0.0455677	LOC109430277	0.0486943	LOC120430223	0.0667412	CTRY002223	0.173756
Down	LOC5568342	0.177292	LOC109415535	0.172312	LOC120425733	0.0571922	CTRY003311	0.0993151
Down	LOC5568346	0.0440524	LOC109413318	0.00860988	LOC120428277	0.0127997	CTRY002797	0.000720981
Down	LOC5568387	0.450482	LOC109418819	0.539514	LOC120422170	0.699309	CTRY006740	0.568673
Down	LOC5568403	3.68795	LOC115264856	0.6974	LOC120424292	0.910605	CTRY000024	10.3138
Down	LOC5568408	1.00574	LOC109427517	0.910252	LOC120424313	1.30425	CTRY000026	1.55245
Down	LOC5568418	0.17556	LOC109414175	0.119455	LOC120423196	0.110727	CTRY012772	0.0418169
Down	LOC5568426	0.020565	LOC109414168	0.0133425	LOC120423207	0.281187	CTRY012777	0.337419
Down	LOC5568436	2.2536	LOC109409150	1.67539	LOC120417806	1.38348	CTRY008561	1.52145
Down	LOC5568450	0.425479	LOC109426390	0.0765196	LOC120425098	0.046221	CTRY008215	0.0874189
Down	LOC5568465	24.1887	LOC109621632	7.59978	LOC120416887	28.0711	CTRY002586	3.96359
Down	LOC5568471	5.1091	LOC109423328	5.03039	LOC120429766	6.87353	CTRY008825	8.16348
Down	LOC5568476	1.27655	LOC115261964	0.551431	LOC120419491	1.05079	CTRY008815	1.99676
Down	LOC5568477	1.26323	LOC109423337	0.151157	LOC120419490	0.0867534	CTRY008814	0.324622
Down	LOC5568481	0.808962	LOC109423339	0.221633	LOC120419503	0.216172	CTRY008812	0.24243
Down	LOC5568484	0.0661327	LOC109622444	0.118885	LOC120426071	0.117635	CTRY000712	0.0555155
Down	LOC5568486	0.180539	LOC109416523	0.0884365	LOC120425340	0.0761885	CTRY004490	0.113735
Down	LOC5568498	0.314211	LOC115253562	0.365378	LOC120413065	0.123222	CTRY011250	0.174297
Down	LOC5568502	0.271025	LOC109431907	0.117858	LOC120413036	0.213429	CTRY011251	0.842105
Down	LOC5568503	1.37601	LOC109431912	0.156517	LOC120413041	2.01107	CTRY011253	3.8832
Down	LOC5568520	0.180756	LOC109426523	0.179781	LOC120416996	0.271739	CTRY007149	0.305155
Down	LOC5568521	0.53285	LOC109426525	0.439731	LOC120416989	0.446973	CTRY007148	0.822819
Down	LOC5568526	0.55125	LOC109427321	0.317767	LOC120431459	0.562068	CTRY012384	0.655371
Down	LOC5568550	19.9001	LOC109405124	13.7391	LOC120416527	0.547034	CTRY009476	39.2738
Down	LOC5568553	0.260851	LOC109411242	0.304881	LOC120426562	0.358188	CTRY012743	0.418169
Down	LOC5568558	0.23022	LOC115262194	0.160965	LOC120426561	0.186103	CTRY012742	0.175379
Down	LOC5568570	0.105639	LOC115262210	0.105713	LOC120426559	0.10067	CTRY012730	0.1469
Down	LOC5568586	0.586644	LOC109425828	0.13371	LOC120423694	0.0942706	CTRY008394	0.201154
Down	LOC5568593	0.0910272	LOC109425820	0.213593	LOC120423691	0.154307	CTRY008384	0.364275
Down	LOC5568600	0.293105	LOC109425815	0.00798267	LOC120423709	0.0552621	CTRY008381	0.131939
Down	LOC5568609	0.0540102	LOC109430162	0.00741248	LOC120423096	0.00375863	CTRY004366	0.0214492
Down	LOC5568611	0.25847	LOC109430169	0.232467	LOC120415585	0.398415	CTRY004234	0.0409156
Down	LOC5568618	0.47083	LOC109430154	0.431121	LOC120423094	0.598842	CTRY004373	0.892033
Down	LOC5568633	1.95411	LOC109428196	1.5248	LOC120414661	1.70693	CTRY005926	0.877974
Down	LOC5568636	0.281957	LOC109427882	0.159938	LOC120414673	0.0712109	CTRY005925	0.0369503
Down	LOC5568648	0.197316	LOC109428190	0.30739	LOC120414715	0.0344372	CTRY005923	0.385725
Down	LOC5568654	0.0993614	LOC109429227	0.492416	LOC120423433	0.00650142	CTRY010996	0.248919
Down	LOC5568658	0.342245	LOC109398864	0.298609	LOC120423439	0.270926	CTRY010999	0.329668
Down	LOC5568659	1.00325	LOC109398795	1.13485	LOC120423429	0.559122	CTRY011000	1.50847
Down	LOC5568668	0.205217	LOC109417347	0.200422	LOC120423438	0.370378	CTRY011006	0.601478
Down	LOC5568679	0.213659	LOC109421885	0.0496636	LOC120414147	0.00314913	CTRY001307	0.0019827
Down	LOC5568680	0.415846	LOC109425098	0.933003	LOC120414160	0.499086	CTRY001302	1.15952
Down	LOC5568690	1.44193	LOC109426897	1.71114	LOC120426851	1.12139	CTRY007044	2.66547
Down	LOC5568696	0.414222	LOC109426905	0.0661421	LOC120431887	0.000203169	CTRY007049	0.0127974
Down	LOC5568708	1.36378	LOC115262587	0.949538	LOC120431538	1.56674	CTRY007063	1.93079
Down	LOC5568714	0.603637	LOC109426924	0.486544	LOC120415155	0.678992	CTRY007608	1.29308
Down	LOC5568717	0.303713	LOC109426927	0.430494	LOC120415122	0.457538	CTRY007611	0.162221
Down	LOC5568726	0.19461	LOC109416957	0.0465846	LOC120425377	0.42564	CTRY002729	0.462689
Down	LOC5568743	0.339755	LOC109403193	0.484662	LOC120413446	0.349858	CTRY009666	1.63789
Down	LOC5568744	0.0761987	LOC109414369	0.0035922	LOC120413498	0.324766	CTRY009665	0.833814
Down	LOC5568748	0.178699	LOC115269984	0.0870681	LOC120413473	0.0145266	CTRY009663	0.0115357
Down	LOC5568759	0.0457842	LOC109404819	0.0385449	LOC120415549	0.0618651	CTRY004225	0.130317
Down	LOC5568764	0.575603	LOC109621264	0.0651158	LOC120426100	0.379825	CTRY007663	0.697368
Down	LOC5568780	0.0675398	LOC109433068	0.0864979	LOC120418639	0.0341325	CTRY005282	0.110671
Down	LOC5568784	1.10596	LOC109415663	2.22466	LOC120419108	0.741365	CTRY011783	1.12924
Down	LOC5568801	0.389328	LOC109419584	0.176816	LOC120425903	0.0641	CTRY005090	0.157354
Down	LOC5568807	0.358913	LOC109419587	0.386589	LOC120425916	0.258025	CTRY005088	0.272891
Down	LOC5568814	0.201429	LOC109419595	0.0742958	LOC120416311	0.301605	CTRY005383	0.280281
Down	LOC5568816	0.120468	LOC109409249	0.0642034	LOC120416331	0.0421577	CTRY005385	0.0755227
Down	LOC5568817	0.0761987	LOC109419599	0.0506329	LOC120416316	0.0313897	CTRY005386	0.0261355
Down	LOC5568836	0.118844	LOC109405054	0.100239	LOC120413772	0.145165	CTRY011546	0.195926
Down	LOC5568867	0.0662409	LOC115255198	0.0793705	LOC120416070	0.241873	CTRY005268	0.375451
Down	LOC5568876	0.267345	LOC115263303	0.396567	LOC120414116	1.22857	CTRY010225	1.86067
Down	LOC5568880	0.519861	LOC109406369	0.687137	LOC120414130	1.53444	CTRY010222	1.65123
Down	LOC5568881	0.477541	LOC109406379	0.455354	LOC120414135	0.972471	CTRY010221	0.587058
Down	LOC5568890	0.380236	LOC109404843	0.246037	LOC120420805	0.852601	CTRY005147	2.32787
Down	LOC5568914	0.22221	LOC109414745	0.117288	LOC120422026	0.0926453	CTRY002045	0.580389
Down	LOC5568927	0.065375	LOC109409124	0.0206409	LOC120432469	0.0451036	CTRY003998	0.0484859
Down	LOC5568938	0.359238	LOC109409140	0.169233	LOC120418693	0.0616619	CTRY003718	0.0443403
Down	LOC5568939	0.562182	LOC109421534	0.0654579	LOC120418694	0.264527	CTRY003717	0.668169
Down	LOC5568941	0.0599632	LOC109421537	0.0532558	LOC120418711	0	CTRY003721	0.133021
Down	LOC5568945	0.173612	LOC109409126	0.200023	LOC120432413	0.295815	CTRY003995	0.462869
Down	LOC5568949	0.0537937	LOC109621471	0.0130574	LOC120421569	0.000609508	CTRY007993	0.000540735
Down	LOC5568951	0.140058	LOC134284747	0.209659	LOC120423746	0.0216375	CTRY007987	0.140771
Down	LOC5568996	0.193311	LOC134291205	0.129889	LOC120430960	0.0158472	CTRY010745	0.135184
Down	LOC5568998	0.249919	LOC109402787	0.249629	LOC120432573	0.395571	CTRY008239	0.283165
Down	LOC5569005	0.397337	LOC109416620	0.464135	LOC120427824	0.47948	CTRY009007	1.30678
Down	LOC5569011	0.358156	LOC109420077	0.126639	LOC120422802	0.203982	CTRY005860	0.167988
Down	LOC5569026	0.960061	LOC115266598	1.30311	LOC120426026	0	CTRY001328	0.0582192
Down	LOC5569035	0.27871	LOC109417547	0.349242	LOC120423127	0.210077	CTRY004757	0.297765
Down	LOC5569042	0.285204	LOC115266748	0.166952	LOC120423128	0.528647	CTRY004755	0.998558
Down	LOC5569048	1.24786	LOC109417534	0.716102	LOC120423136	0.270114	CTRY004750	0.000540735
Down	LOC5569049	5.26756	LOC115253744	8.35973	LOC120423124	0.681837	CTRY004748	2.63915
Down	LOC5569067	0.304362	LOC109418088	0.233835	LOC120413843	0.325884	CTRY003797	0.355083
Down	LOC5569069	0.134538	LOC109418063	0.116661	LOC120413867	0.0754775	CTRY003799	0.0897621
Down	LOC5569074	0.856911	LOC109421664	1.27848	LOC120413874	1.11215	CTRY003805	1.78461
Down	LOC5569076	0.667821	LOC109421659	0.436709	LOC120413862	0.502438	CTRY003808	1.46918
Down	LOC5569077	0.173287	LOC109421660	0.059813	LOC120412466	0.0214344	CTRY003594	0.199712
Down	LOC5569083	0.454919	LOC109421653	0.631885	LOC120417648	0.373324	CTRY003589	0.796503
Down	LOC5569086	0.0387488	LOC109421651	0.0320447	LOC120412467	0.00670459	CTRY003586	0.0252343
Down	LOC5569093	0.135837	LOC109432404	0.0481811	LOC120413765	0.0696871	CTRY011517	0.0603821
Down	LOC5569123	0.0795541	LOC109408854	0.51665	LOC120416981	0.249797	CTRY002563	0.216835
Down	LOC5569141	0.293538	LOC109407533	0.285152	LOC120429106	0.320093	CTRY008430	0.871846
Down	LOC5569142	0.0874554	LOC109407655	0.077888	LOC120429111	0.07436	CTRY008431	0.102559
Down	LOC5569143	0.436844	LOC109407536	0.144486	LOC120429098	0.505486	CTRY008433	0.482696
Down	LOC5569144	0.946423	LOC109407537	0.549721	LOC120429100	0.848334	CTRY008432	1.21179
Down	LOC5569157	0.170365	LOC109422689	0.175277	LOC120412598	0.27306	CTRY009387	1.86626
Down	LOC5569161	0.0860483	LOC109422538	0.047953	LOC120421525	0.0282406	CTRY009398	0.0493872
Down	LOC5569163	0.461847	LOC109425710	0.156517	LOC120412636	1.17249	CTRY009394	0.177722
Down	LOC5569164	0.10618	LOC109422596	0.0520584	LOC120421533	0.0858391	CTRY009396	0.0055876
Down	LOC5569168	0.644117	LOC109423401	0.745638	LOC120427041	0.530069	CTRY009610	0.00865177
Down	LOC5569174	0.150449	LOC109425709	0.182461	LOC120412594	0.0644047	CTRY009393	0.0643475
Down	LOC5569181	2.07295	LOC109429440	1.94617	LOC120417348	0.610727	CTRY005456	0.27938
Down	LOC5569183	2.05921	LOC109429439	1.28447	LOC120417350	3.78535	CTRY005458	1.98648
Down	LOC5569186	0.110618	LOC109429432	0.0700194	LOC120419785	0.128911	CTRY005735	0.0230714
Down	LOC5569187	0.0650503	LOC109425152	0.540883	LOC120419786	0.0356562	CTRY005734	0.0295602
Down	LOC5569188	0.142656	LOC109425149	0.178356	LOC120429031	0.0490654	CTRY005527	0.00937275
Down	LOC5569212	0.248945	LOC109397838	0.0325009	LOC120426579	0.0446973	CTRY008721	0.284066
Down	LOC5569214	0.177941	LOC115269210	0.379348	LOC120427283	0.228972	CTRY008723	0.180966
Down	LOC5569219	0.117329	LOC115259649	0.181549	LOC120431609	0.0729378	CTRY002943	0.104362
Down	LOC5569240	0.254681	LOC109417893	0.346049	LOC120432484	0.217493	CTRY002114	0.380497
Down	LOC5569267	0.162463	LOC109413270	0.165868	LOC120416851	0.153799	CTRY002537	0.0782264
Down	LOC5569269	0.184111	LOC109430375	0.0729844	LOC120415460	0.157152	CTRY002533	0.00775054
Down	LOC5569287	0.0903778	LOC109410890	0.126696	LOC120419104	0.117229	CTRY011781	0.0776857
Down	LOC5569288	0.319515	LOC109621284	0.176246	LOC120424188	0.179805	CTRY008848	1.31525
Down	LOC5569310	2.66923	LOC115258685	1.82039	LOC120428306	1.55861	CTRY005623	1.17069
Down	LOC5569333	0.132807	LOC109407248	0.104915	LOC120428341	0.0566843	CTRY005632	0.0569575
Down	LOC5569338	0.97056	LOC115254012	0.94931	LOC120428392	0	CTRY005624	0.68349
Down	LOC5569340	0.182704	LOC109407254	0.261774	LOC120427756	0	CTRY005626	0.0814708
Down	LOC5569343	0.0469748	LOC115258726	0.0233208	LOC120428576	0.0355547	CTRY005631	0.037491
Down	LOC5569392	0.0545514	LOC109410206	0.0167636	LOC120430376	0.0343356	CTRY004739	0.0580389
Down	LOC5569427	0.304146	LOC109407961	0.152583	LOC120418477	0.28332	CTRY009813	0.638428
Down	LOC5569444	0.0494642	LOC115255089	0.0433345	LOC120416878	0.0641	CTRY005517	0.0643475
Down	LOC5569448	0.0713281	LOC115269199	0.127552	LOC120426050	0.170154	CTRY008581	0.402487
Down	LOC5569466	0.420067	LOC109415565	0.26702	LOC120420228	0.718204	CTRY000594	0.373468
Down	LOC5569471	0.126745	LOC115253976	0.0620367	LOC120415052	0.0844169	CTRY000060	0.114996
Down	LOC5569496	0.348847	LOC109622886	0.0482951	LOC120428085	0.339902	CTRY005498	1.7071
Down	LOC5569497	0.489014	LOC109622877	0.198027	LOC120428097	0.606156	CTRY005492	0.869142
Down	LOC5569498	0.121333	LOC109622883	0.191584	LOC120428094	0.104835	CTRY005497	0.417267
Down	LOC5569502	0.302305	LOC109622880	0.0332991	LOC120428099	0.0710077	CTRY005494	0.265321
Down	LOC5569504	0.31367	LOC115258013	0.165754	LOC120428091	0.228464	CTRY005491	0.0510094
Down	LOC5569505	0.0962225	LOC115254005	0.0589577	LOC120428093	0.356359	CTRY005493	0.224766
Down	LOC5569514	0.75138	LOC109411698	0.102805	LOC120419044	1.00752	CTRY003512	1.78533
Down	LOC5569515	0.0826929	LOC109411701	0.0433915	LOC120419040	0.312881	CTRY003510	0.549027
Down	LOC5569518	0.781037	LOC109411696	0.0574752	LOC120419047	0.200122	CTRY003514	1.27668
Down	LOC5569520	2.07371	LOC109411704	1.22357	LOC120419078	1.57304	CTRY003505	1.29704
Down	LOC5569522	0.183137	LOC109404606	0.115293	LOC120419076	0.254978	CTRY003504	0.162761
Down	LOC5569539	0.234008	LOC109403454	0.287604	LOC120425794	0.262495	CTRY006516	0.950793
Down	LOC5569540	0.334344	LOC109433195	0.488653	LOC120425797	0.559325	CTRY006515	0.0205479
Down	LOC5569553	1.03442	LOC109397190	0.770213	LOC120412406	0.435595	CTRY000892	0.62509
Down	LOC5569556	0.123498	LOC109432080	0.197514	LOC120413171	0.283117	CTRY000887	0.36788
Down	LOC5569566	4.63567	LOC109422035	1.01437	LOC120412599	5.72928	CTRY000877	9.94449
Down	LOC5569582	40.6456	LOC109408226	15.2406	LOC120423615	41.3027	CTRY009888	42.8412
Down	LOC5569590	1.2536	LOC109416014	0.25727	LOC128092258	0.24228	CTRY010023	2.49531
Down	LOC5569591	0.109644	LOC109419418	0.170145	LOC120426205	0.000812678	CTRY010005	0.454578
Down	LOC5569595	0.122416	LOC109419413	0.14614	LOC120424318	0.294494	CTRY010017	0.306236
Down	LOC5569604	0.556337	LOC109416078	0.350097	LOC120418532	0.215563	CTRY010030	0.204037
Down	LOC5569606	0.286178	LOC109416132	0.00273691	LOC120418525	0.000304754	CTRY010032	0
Down	LOC5569629	0.456976	LOC109408415	0.222032	LOC120414813	0.119362	CTRY011424	0.26496
Down	LOC5569632	1.5979	LOC109401059	1.07777	LOC120414826	0.96668	CTRY011425	2.14456
Down	LOC5569644	0.141682	LOC109416375	0.0611814	LOC120424586	0.0354531	CTRY002148	0.280642
Down	LOC5569655	0.0849659	LOC115254267	0.0608963	LOC120414376	0.0480496	CTRY011365	0.018385
Down	LOC5569668	0.106613	LOC109433386	0.0601551	LOC120423601	0.0369768	CTRY009893	0.0973324
Down	LOC5569670	29.8031	LOC109406360	12.7282	LOC120431439	0	CTRY001796	38.133
Down	LOC5569673	0.191579	LOC109411292	0.128008	LOC120414084	0.193214	CTRY005315	0.18403
Down	LOC5569674	0.29895	LOC109406377	0.275345	LOC120428953	0	CTRY001809	0.55137
Down	LOC5569700	1.01634	LOC109429880	0.627381	LOC120420492	1.14344	CTRY003890	2.5995
Down	LOC5569738	1.99145	LOC109410641	2.1401	LOC120425096	2.04734	CTRY008220	7.30461
Down	LOC5569745	1.80301	LOC109410645	1.53227	LOC120427511	3.40085	CTRY008224	0.604182
Down	LOC5569749	0.178266	LOC109410639	0.0976166	LOC120425095	0.0679602	CTRY008219	0.0313627
Down	LOC5569750	1.06722	LOC109404691	0.196488	LOC120418133	0.675335	CTRY001427	1.16096
Down	LOC5569772	0.125771	LOC109411740	0.0193865	LOC120429069	0.0261073	CTRY003453	0.0263158
Down	LOC5569780	1.46206	LOC109424680	0.538602	LOC120415100	0.286469	CTRY007605	0.336698
Down	LOC5569782	0.579067	LOC115259975	0.196602	LOC120415125	0.485372	CTRY007603	2.31561
Down	LOC5569787	0.635567	LOC109412033	0.52258	LOC120415135	0.998883	CTRY007602	2.32174
Down	LOC5569797	0.115922	LOC109428901	0.047782	LOC120429996	0.0368753	CTRY007442	0.0362293
Down	LOC5569798	0.344085	LOC109414924	0.560953	LOC120431570	0.00121902	CTRY007441	0.0556957
Down	LOC5569816	0.350579	LOC109429643	0.33607	LOC120413881	0.17117	CTRY003818	0.0875991
Down	LOC5569822	0.246672	LOC109429650	0.237541	LOC120413826	0	CTRY012378	0.192322
Down	LOC5569832	1.42137	LOC109426996	4.01015	LOC120419521	0.0616619	CTRY005733	5.27073
Down	LOC5569847	0.415846	LOC109417693	1.97771	LOC120422440	0.23527	CTRY005235	0
Down	LOC5569859	0.157376	LOC115255347	0.43534	LOC120423144	0.164364	CTRY005231	0
Down	LOC5569863	2.58166	LOC115255337	1.31771	LOC120415476	3.05313	CTRY004992	2.78443
Down	LOC5569864	0.419959	LOC109418015	0.195233	LOC120415490	0.476026	CTRY004990	0.697729
Down	LOC5569868	0.0706786	LOC109621844	0.0218953	LOC120415578	0.073141	CTRY004219	0.00108147
Down	LOC5569890	0.0609373	LOC109402465	0.0918577	LOC120430357	0.00223486	CTRY002185	0.0454218
Down	LOC5569895	0.568893	LOC109399229	1.78817	LOC120422649	0	CTRY010410	1.41997
Down	LOC5569897	0.101201	LOC109429027	0.0521154	LOC120431636	0.0318976	CTRY010407	0.34553
Down	LOC5569898	1.03496	LOC109399253	1.20156	LOC120431522	1.13135	CTRY010406	1.51136
Down	LOC5569899	0.488148	LOC109429026	0.462881	LOC120431634	0.16792	CTRY010405	0.512978
Down	LOC5569911	0.0270592	LOC109413981	0.0246322	LOC120424809	0.00436814	CTRY010398	0.0436193
Down	LOC5569918	0.0881048	LOC109421987	0.00923709	LOC120415621	0.0218407	CTRY000692	0.0248738
Down	LOC5569936	0.317892	LOC109427500	0.211826	LOC120422532	0.158777	CTRY000014	0.246395
Down	LOC5569950	4.15997	LOC109415649	3.44788	LOC120419112	3.66406	CTRY011790	13.52
Down	LOC5569968	4.33369	LOC109425587	2.36161	LOC120420548	3.01503	CTRY007166	6.90393
Down	LOC5569998	0.107696	LOC109423387	0.0590147	LOC120423371	0.000914262	CTRY011692	0.0670512
Down	LOC5570014	0.31367	LOC134291431	0.245524	LOC120419565	0.685697	CTRY006151	0.930065
Down	LOC5570016	0.0537937	LOC134291427	0.0529707	LOC120419555	0.0231613	CTRY006152	0.0432588
Down	LOC5570017	0.780604	LOC134291428	0.527654	LOC120419562	0.212007	CTRY006153	0.781363
Down	LOC5570020	1.15402	LOC134289877	0.180351	LOC120419568	3.2439	CTRY006155	0.254326
Down	LOC5570041	0.255547	LOC109400448	0.1775	LOC120416629	0.275701	CTRY006171	0.171413
Down	LOC5570046	0.0510878	LOC109399598	0.0400274	LOC120416625	0.0382974	CTRY006174	0.430606
Down	LOC5570050	1.68243	LOC109399541	0.293363	LOC120416623	0.618346	CTRY006175	0.402487
Down	LOC5570054	0.310098	LOC109405475	0.269985	LOC120416669	0.0696871	CTRY006178	0.36031
Down	LOC5570055	0.380236	LOC109430465	0.312464	LOC120429834	0.428992	CTRY011699	0.498017
Down	LOC5570058	0.0922178	LOC109430466	0.0375755	LOC120429827	0.162332	CTRY011698	0.0766042
Down	LOC5570063	0.37017	LOC109429508	0.469039	LOC120423637	0.319382	CTRY012340	0.083814
Down	LOC5570068	0.288776	LOC109429505	0.348842	LOC120423923	0.175437	CTRY012342	0.064708
Down	LOC5570078	0.131075	LOC109431761	0.186281	LOC120417644	0.0907152	CTRY012354	0.189978
Down	LOC5570080	0.605801	LOC109431766	0.378378	LOC120417658	0.356562	CTRY012357	0.804254
Down	LOC5570082	0.0543349	LOC109409483	0.0117459	LOC120426029	0	CTRY001329	0.0385725
Down	LOC5570089	0.0953566	LOC109418955	0.102634	LOC120432598	0.137647	CTRY008782	0.0906633
Down	LOC5570090	0.493343	LOC109418954	0.10999	LOC120432597	1.15197	CTRY008781	0.0731795
Down	LOC5570111	0.658946	LOC115255731	1.25459	LOC120417708	0.400853	CTRY000536	0.0643475
Down	LOC5570114	4.35361	LOC109414700	7.11461	LOC120417707	0.0285453	CTRY000533	0.288392
Down	LOC5570118	0.211495	LOC109414682	0.0473828	LOC120413707	0.2628	CTRY001492	0.371125
Down	LOC5570127	0.0774976	LOC109423086	0.0850154	LOC120416160	0.0583096	CTRY012623	0.229452
Down	LOC5570136	0.484901	LOC134290082	0.0439047	LOC120416144	0.335534	CTRY012629	0.593727
Down	LOC5570138	0.0502219	LOC134284148	0.0401984	LOC120416158	0.0439862	CTRY012631	0.0587599
Down	LOC5570139	35.5495	LOC134284018	19.863	LOC120416159	40.1054	CTRY012633	49.2017
Down	LOC5570147	0.691417	LOC109423425	0.758296	LOC120420952	0.336245	CTRY011671	0.672495
Down	LOC5570159	0.48187	LOC109414508	0.445262	LOC120420944	0.561459	CTRY011685	0.802451
Down	LOC5570175	0.19764	LOC109623352	0.171228	LOC120422958	0.168732	CTRY007639	0.364456
Down	LOC5570204	0.159108	LOC109426343	0.0841601	LOC120414346	0.294088	CTRY012695	0.328046
Down	LOC5570205	0.261933	LOC109405631	0.321929	LOC120414363	0.426859	CTRY012696	0.943583
Down	LOC5570208	0.269726	LOC109405004	0.431634	LOC120414355	0.290329	CTRY012694	0.647801
Down	LOC5570214	0.759281	LOC109426339	0.411392	LOC120414362	1.52306	CTRY012698	0.131218
Down	LOC5570218	0.243425	LOC109426333	0.282586	LOC120414344	0.200528	CTRY012707	0.482156
Down	LOC5570223	0.146444	LOC109426330	0.41259	LOC120415380	0.0952865	CTRY007368	0.864636
Down	LOC5570228	0.246347	LOC109407197	0.136447	LOC120414342	0.0962007	CTRY012709	0.168709
Down	LOC5570230	0.622362	LOC109426283	1.1592	LOC120422607	0.321516	CTRY011458	8.0292
Down	LOC5570233	1.49713	LOC109426322	1.14226	LOC120414329	1.87983	CTRY012716	1.3376
Down	LOC5570234	0.168633	LOC109407229	0.213251	LOC120414330	0.236286	CTRY012717	0.883742
Down	LOC5570237	0.157593	LOC109426316	0.185597	LOC120414305	0.324665	CTRY012726	0.429344
Down	LOC5570244	47.2895	LOC109405852	23.1299	LOC120425218	32.3978	CTRY012440	53.7435
Down	LOC5570245	0.22589	LOC109399839	0.118771	LOC120418357	0.323243	CTRY003284	0.80119
Down	LOC5570254	0.232709	LOC109409734	0.0792565	LOC120428394	0.201849	CTRY008494	1.06435
Down	LOC5570258	0.124689	LOC109431947	0.108222	LOC120428404	0.094677	CTRY008499	0.0820115
Down	LOC5570276	0.182379	LOC109409733	0.162675	LOC120428395	0	CTRY008493	0.256669
Down	LOC5570277	0.331746	LOC109409731	0.301346	LOC120428398	0	CTRY008492	0.85328
Down	LOC5570312	0.661976	LOC115257197	0.19683	LOC128093030	0	CTRY006329	0.074982
Down	LOC5570335	2.49031	LOC115270301	2.2949	LOC120429710	3.15126	CTRY010728	4.14005
Down	LOC5570363	0.684165	LOC109420406	1.35255	LOC120421682	0.269504	CTRY006844	0.512617
Down	LOC5570364	0.0784717	LOC134292130	0.382484	LOC120426423	0.0332182	CTRY006846	0.326784
Down	LOC5570383	0.225349	LOC109622537	0.0771468	LOC120429683	0.00284437	CTRY005981	0.13969
Down	LOC5570396	0.324927	LOC115265342	0.20983	LOC120422347	0.394352	CTRY008987	0.3823
Down	LOC5570418	0.090486	LOC109397703	0.0142548	LOC120427970	0.0202154	CTRY001349	0.072819
Down	LOC5570419	0.134971	LOC115269543	0.0618657	LOC120427968	0.0643031	CTRY001348	0.151406
Down	LOC5570422	0.0505466	LOC109420001	0.0415099	LOC120414097	0.0166599	CTRY004955	0.00324441
Down	LOC5570423	0.338673	LOC109420022	0.0754362	LOC120414085	0.00782202	CTRY004957	0.105624
Down	LOC5570433	0.562074	LOC109420079	0.431178	LOC120414100	0.391609	CTRY005079	0.0387527
Down	LOC5570461	0.707544	LOC109418026	0.193979	LOC120422917	0	CTRY009139	0.339041
Down	LOC5570462	0.281632	LOC109418021	0.267362	LOC120422914	0.134397	CTRY009138	0.146539
Down	LOC5570471	0.0746834	LOC109398703	0.125442	LOC120420797	0.0909183	CTRY005150	0.648883
Down	LOC5570478	0.103366	LOC115261534	0.000171057	LOC120426125	0.0346404	CTRY008878	0.00504686
Down	LOC5570501	0.275679	LOC109418106	0.230186	LOC120427083	0.089293	CTRY008702	0.159156
Down	LOC5570505	1.08865	LOC109406436	0.540141	LOC120425590	1.66965	CTRY009179	0.674297
Down	LOC5570509	0.906808	LOC109418082	0.876155	LOC120425582	0.511784	CTRY009175	1.95638
Down	LOC5570511	0.114623	LOC109418079	0.095678	LOC120425583	0.129724	CTRY009173	0.035328
Down	LOC5570512	0.108129	LOC109418080	0.0871821	LOC120425596	0.0426656	CTRY009172	0.0263158
Down	LOC5570517	0.107912	LOC109428434	0.0931691	LOC120432472	0.165278	CTRY000812	0.173756
Down	LOC5570534	0.384782	LOC109418094	0.441156	LOC120417422	0.323141	CTRY009307	0.550649
Down	LOC5570550	0.164736	LOC109419258	0.297126	LOC120413665	0.31989	CTRY011961	0.0784066
Down	LOC5570553	0.124581	LOC109419262	0.120823	LOC120413652	0.267676	CTRY011959	0.167087
Down	LOC5570554	0.199372	LOC109419260	0.408028	LOC120413667	0.297237	CTRY011960	0.122567
Down	LOC5570558	0.0515207	LOC109427333	0.0382598	LOC120413681	0.0871597	CTRY011964	0.349135
Down	LOC5570571	0.175452	LOC109420146	0.31771	LOC120417568	0.240959	CTRY006426	0.19124
Down	LOC5570581	0.073601	LOC109431247	0.0342684	LOC120417570	0.0360626	CTRY006427	0.0780461
Down	LOC5570587	0.167226	LOC109409480	0.0498917	LOC120431687	0.0327103	CTRY001325	0.1323
Down	LOC5570591	0.508713	LOC109397641	0.214278	LOC120426032	0.021028	CTRY001330	0.403208
Down	LOC5570616	0.883321	LOC109417765	0.447314	LOC120416790	0.535148	CTRY004656	0.58832
Down	LOC5570619	0.330014	LOC115266711	0.129091	LOC120424934	0.29998	CTRY001814	0.612833
Down	LOC5570621	0.108562	LOC109430721	0.0650017	LOC120422562	0.086347	CTRY002854	0.0273973
Down	LOC5570648	0.447126	LOC109427518	0.00342114	LOC120424297	0.123121	CTRY000029	0.255588
Down	LOC5570653	1.0052	LOC109427522	0.108849	LOC120420181	0.595998	CTRY000556	0.686013
Down	LOC5570654	0.307609	LOC109427482	0.120367	LOC120420180	0	CTRY000558	0.424477
Down	LOC5570663	0.354476	LOC109409075	0.566883	LOC120417835	0.110829	CTRY008564	1.46774
Down	LOC5570666	0.053036	LOC109408903	0.0377466	LOC120417797	0.00721252	CTRY008927	0.00955299
Down	LOC5570667	0.299708	LOC109622582	0.284924	LOC120417800	0.109204	CTRY008928	0.0412761
Down	LOC5570670	0.991774	LOC109622522	1.14403	LOC120417824	1.45022	CTRY008568	1.93187
Down	LOC5570678	0.948371	LOC109622515	0.410423	LOC120417840	0.719321	CTRY008921	1.5712
Down	LOC5570694	0.249053	LOC109433591	0.102292	LOC120415716	0.153901	CTRY004411	0.467015
Down	LOC5570695	0.270809	LOC109433573	0.3684	LOC120415708	0.665075	CTRY004414	0.835256
Down	LOC5570780	0.809503	LOC109426117	0.764454	LOC120418831	1.51707	CTRY012395	3.59895
Down	LOC5570784	2.10921	LOC115263209	3.11364	LOC120414464	9.02519	CTRY009975	2.77992
Down	LOC5570786	0.100011	LOC109424157	0.0550804	LOC120414431	0.0482527	CTRY009983	0.150144
Down	LOC5570788	0.0973049	LOC109424158	0.138214	LOC120414462	0.0174726	CTRY009985	0.0879596
Down	LOC5570792	0.147419	LOC109424164	0.142719	LOC120414481	0	CTRY009988	0.104542
Down	LOC5570794	0.213876	LOC109424156	0.355229	LOC120414433	0.305262	CTRY009980	0.164384
Down	LOC5570801	0.0754411	LOC115256201	0.14135	LOC120428492	0.238216	CTRY006035	0.0405552
Down	LOC5570809	0.179565	LOC109431996	0.166211	LOC120425265	0.145774	CTRY006399	0.0948089
Down	LOC5570813	0.0611538	LOC109432009	0.00153951	LOC120417976	0.0106664	CTRY006546	0.00036049
Down	LOC5570821	0.460764	LOC109419949	0.421428	LOC120427959	0.336144	CTRY004803	0.177361
Down	LOC5570826	0.397013	LOC109419940	0.541054	LOC120427965	0.569992	CTRY004800	2.61175
Down	LOC5570828	0.193852	LOC109417504	0.0420801	LOC120427960	0.149634	CTRY004804	0.146179
Down	LOC5570837	0.0674315	LOC109414950	0.0525716	LOC120414291	0.0874644	CTRY003094	0.140771
Down	LOC5570839	0.100336	LOC109397201	0.0550804	LOC120414293	0.0376879	CTRY003093	0.174117
Down	LOC5570848	0.0961143	LOC109429973	0.0729274	LOC120412667	0.0411418	CTRY003672	0.0266763
Down	LOC5570858	0.159	LOC109429564	0.0367203	LOC120412691	0.0354531	CTRY003664	0.0567772
Down	LOC5570871	0.503301	LOC109408162	0.10252	LOC120424644	0.0637952	CTRY010202	0.311283
Down	LOC5570877	0.327958	LOC109429210	0.181435	LOC120421496	0.0900041	CTRY010981	0.197008
Down	LOC5570913	0.317134	LOC109401363	0.34679	LOC120422992	0.30638	CTRY005639	0.504686
Down	LOC5570914	0.30512	LOC109432862	0.22762	LOC120422988	0.272247	CTRY005640	0.590663
Down	LOC5570921	0.147527	LOC109412369	0.0463565	LOC120422981	0.0853312	CTRY005646	0.0746215
Down	LOC5570922	0.367464	LOC109412368	0.364067	LOC120422970	0.625457	CTRY005647	1.76622
Down	LOC5570924	1.17275	LOC109401373	0.515053	LOC120418288	1.00965	CTRY005651	1.52235
Down	LOC5570930	0.496266	LOC109428250	0.201904	LOC120414685	0.49167	CTRY005956	0.689257
Down	LOC5570932	0.631129	LOC115266368	0.407173	LOC120414728	0.762495	CTRY005954	0.179524
Down	LOC5570947	0.215175	LOC109411441	0.0640894	LOC120428697	0.146384	CTRY008467	0.553713
Down	LOC5570951	0.448425	LOC109411446	0.527825	LOC120428691	0.804449	CTRY008470	2.68006
Down	LOC5570952	0.106505	LOC109411447	0.139298	LOC120428693	0.163551	CTRY008471	0.155011
Down	LOC5570954	0.0776058	LOC115258541	0.101152	LOC120419382	0.218102	CTRY005162	0.24261
Down	LOC5570960	0.887975	LOC115258816	1.08684	LOC120430944	0.512901	CTRY005900	3.50342
Down	LOC5570989	0.410218	LOC109404483	0.297012	LOC120418273	0.329947	CTRY010832	0.696107
Down	LOC5570994	0.4021	LOC115257884	0.26263	LOC120414909	0.342036	CTRY006620	0.358688
Down	LOC5571011	0.298625	LOC109418514	0.456152	LOC120414897	0.528342	CTRY006608	0.588861
Down	LOC5571015	0.11722	LOC115257525	0.0522294	LOC120418436	0.027631	CTRY006917	0.00865177
Down	LOC5571016	0.15651	LOC115257693	0.0526856	LOC120418452	0.0919342	CTRY006919	0.0796683
Down	LOC5571037	0.0355017	LOC115263357	0.000342114	LOC120414435	0.000304754	CTRY009959	0.0203677
Down	LOC5571039	6.9566	LOC115263355	1.38893	LOC120414477	0.0828931	CTRY009957	0.0430786
Down	LOC5571045	0.500162	LOC109423871	0.631942	LOC120419516	0.704795	CTRY010269	0.625811
Down	LOC5571047	1.56467	LOC109424237	0.750086	LOC120419525	1.51554	CTRY010270	3.19376
Down	LOC5571053	8.2063	LOC109426636	0.121165	LOC120420702	0.512495	CTRY009283	0.394016
Down	LOC5571059	0.252084	LOC109401061	0.117117	LOC120414819	0.115705	CTRY011430	0.18367
Down	LOC5571067	0.272757	LOC109401060	0.188049	LOC120414828	0.0651158	CTRY011432	0.0686734
Down	LOC5571075	0.0961143	LOC109408510	0.0464135	LOC120414822	0.00965055	CTRY011437	0.110671
Down	LOC5571080	1.22567	LOC109419385	1.38904	LOC120414792	1.27347	CTRY011442	1.91114
Down	LOC5571084	0.706895	LOC109408437	0.508496	LOC120414845	0.0165583	CTRY011444	0.0245133
Down	LOC5571093	2.90713	LOC109419378	5.40016	LOC120430879	0.0737505	CTRY011448	7.73738
Down	LOC5571107	0.158134	LOC109417180	0.108393	LOC120419588	0.0865502	CTRY006461	0.149603
Down	LOC5571113	0.314536	LOC109422416	0.362071	LOC120425571	0.478566	CTRY006455	0.782985
Down	LOC5571127	0.67648	LOC109422442	0.265082	LOC120419590	0.411113	CTRY006463	0.197729
Down	LOC5571132	0.0787964	LOC109426169	0.137644	LOC120419428	0.120073	CTRY012420	0.0371305
Down	LOC5571136	0.284663	LOC115270953	0.0371194	LOC120418992	0.0915278	CTRY012416	0.151947
Down	LOC5571140	0.253382	LOC109427913	0.168092	LOC120414656	0.167716	CTRY005946	0.302091
Down	LOC5571141	0.550925	LOC115254008	0.793078	LOC120426507	1.61093	CTRY007240	1.95836
Down	LOC5571150	1.81914	LOC115263987	0.0647166	LOC120414675	1.763	CTRY005938	3.5283
Down	LOC5571153	0.429267	LOC109427897	0.151899	LOC120414669	0.718306	CTRY005937	1.84643
Down	LOC5571172	0.214525	LOC134292263	0.00735546	LOC120425269	0.0818773	CTRY006779	0.122567
Down	LOC5571173	1.07328	LOC109406496	1.19061	LOC120425282	1.01036	CTRY006777	1.11337
Down	LOC5571188	0.609698	LOC109403230	0.827232	LOC120412382	0.223385	CTRY009508	0.144557
Down	LOC5571200	0.0791211	LOC109432274	0.0379177	LOC120418154	0.0298659	CTRY007767	0.0346071
Down	LOC5571202	0.0937331	LOC109397096	0.08684	LOC120420332	0.0757822	CTRY007801	0.534968
Down	LOC5571203	0.111592	LOC109397149	0.269415	LOC120420334	0.0403291	CTRY007800	0.0800288
Down	LOC5571208	0.748133	LOC109432273	1.20173	LOC120418156	0.317249	CTRY007768	0.226929
Down	LOC5571226	2.23325	LOC109422051	1.48033	LOC120412765	3.28759	CTRY000862	7.28046
Down	LOC5571228	0.227081	LOC109401498	0.163987	LOC120417657	0.121597	CTRY012469	0.0583994
Down	LOC5571237	0.163005	LOC109410465	0.0156232	LOC120417650	0.188033	CTRY012473	0.369322
Down	LOC5571267	0.175668	LOC109423373	0.0964762	LOC120426631	0.0140187	CTRY008673	0.229813
Down	LOC5571277	0.0991449	LOC109408373	0.0251454	LOC120426918	0.00934579	CTRY008682	0.0342466
Down	LOC5571284	0.194718	LOC109622492	0.0537119	LOC120422832	0.043783	CTRY008902	0.133021
Down	LOC5571294	0.109969	LOC109408687	0.134793	LOC120424430	0.135514	CTRY008911	0.0609229
Down	LOC5571304	2.50005	LOC109410132	1.03849	LOC120422058	1.14506	CTRY000389	9.13987
Down	LOC5571305	0.14428	LOC109410133	0.0524005	LOC120422057	0.342239	CTRY000388	0.074261
Down	LOC5571308	0.157376	LOC109410141	0.0355799	LOC120422047	0.253048	CTRY000387	0.618962
Down	LOC5571319	0.146228	LOC134287600	0.0222944	LOC120419469	0.0497765	CTRY003935	0.0113554
Down	LOC5571322	0.0891871	LOC109410121	0.0580454	LOC120420591	0.12566	CTRY001231	0.236482
Down	LOC5571387	0.638597	LOC109622784	0.362755	LOC120413162	0.478058	CTRY009774	0.739906
Down	LOC5571397	0.216907	LOC109404972	0.410879	LOC120430572	0.241264	CTRY010803	0.319935
Down	LOC5571409	0.209546	LOC115263169	0.276029	LOC120417619	0.203474	CTRY009929	0.391312
Down	LOC5571412	0.0962225	LOC109430972	0.0033071	LOC120416536	0.0183868	CTRY009482	0.0430786
Down	LOC5571414	0.283256	LOC109406842	0.408427	LOC120423737	0.440573	CTRY012332	0.254867
Down	LOC5571418	0.529927	LOC109411274	0.858023	LOC120422937	0.990959	CTRY004891	0.748378
Down	LOC5571419	0.0737093	LOC109411275	0.044931	LOC120422741	0.119565	CTRY004890	0.187635
Down	LOC5571428	0.196775	LOC134287922	0.0914585	LOC120413588	0.057497	CTRY005212	0.287131
Down	LOC5571433	0.182271	LOC134287927	0.134565	LOC120413616	0.168326	CTRY005215	0.384283
Down	LOC5571437	0.13811	LOC109406399	0.18668	LOC120422124	0.544291	CTRY003380	0.0859769
Down	LOC5571444	0.18476	LOC109409715	0.210058	LOC120427613	0.32243	CTRY008476	0.280642
Down	LOC5571447	0.323953	LOC109411457	0.429867	LOC120427602	0.274076	CTRY008474	0.138068
Down	LOC5571449	0.291482	LOC109411464	0.132056	LOC120427609	0.22501	CTRY008477	0.3531
Down	LOC5571450	0.752571	LOC109409719	1.14933	LOC120427611	0.833503	CTRY008478	1.75144
Down	LOC5571453	1.35935	LOC109411467	3.28892	LOC120427608	1.43377	CTRY008481	10.1592
Down	LOC5571461	0.643251	LOC109432412	0.319877	LOC120414849	0.0836042	CTRY011408	1.06849
Down	LOC5571466	1.93398	LOC109408401	1.46801	LOC120414837	2.48039	CTRY011410	1.95981
Down	LOC5571467	0.0913519	LOC109408402	0.112213	LOC120414850	0.0800488	CTRY011412	0.0760635
Down	LOC5571484	0.220154	LOC109426686	0.22648	LOC120417403	0.386428	CTRY009296	0.525415
Down	LOC5571495	0.0566079	LOC109427680	0.0465275	LOC120419892	0.446059	CTRY001682	0.653749
Down	LOC5571500	1.84436	LOC109431390	0.950393	LOC120418090	0.000507924	CTRY001690	0.744052
Down	LOC5571502	0.105747	LOC109427697	0.238397	LOC120418057	0	CTRY001692	0.11031
Down	LOC5571505	0.0846412	LOC109431380	0.0532558	LOC120418054	0.000812678	CTRY001697	0.0529921
Down	LOC5571506	0.515316	LOC109427701	0.330425	LOC120419905	0.199817	CTRY001696	3.39996
Down	LOC5571525	0.107696	LOC109409200	0.00461854	LOC120419474	0.00700935	CTRY003934	0.000180245
Down	LOC5571529	0.0129884	LOC109409164	0.0334132	LOC120426116	0	CTRY007154	0
Down	LOC5571540	0.0180755	LOC109421559	0.685597	LOC120417747	0.075579	CTRY003928	0.598414
Down	LOC5571544	1.99048	LOC109409214	0.0014825	LOC120417717	0.00213328	CTRY003916	0.171233
Down	LOC5571557	0.14547	LOC115254024	0.131999	LOC120415979	0.0936611	CTRY004729	0.152127
Down	LOC5571558	0.198182	LOC109410195	0.302201	LOC120416016	0.244718	CTRY004730	1.21972
Down	LOC5571560	0.0891871	LOC109410191	0.0728133	LOC120412784	0.138866	CTRY004479	0.212149
Down	LOC5571564	41.9013	LOC115260570	17.0197	LOC120425318	30.8701	CTRY000512	20.6738
Down	LOC5571567	0.155861	LOC109422989	0.0595279	LOC120417757	0.191995	CTRY000953	0.234859
Down	LOC5571571	1.53556	LOC109403563	0.810697	LOC120417779	1.80181	CTRY000960	0.452055
Down	LOC5571573	0.0730599	LOC109405320	0.08684	LOC120417760	0.126879	CTRY000950	0.0425379
Down	LOC5571588	0.112891	LOC109429165	0.00547383	LOC120421998	0.00193011	CTRY010942	0.00973324
Down	LOC5571596	3.02803	LOC109417874	4.9923	LOC120430781	5.15918	CTRY009321	6.13176
Down	LOC5571607	0.0950319	LOC109621448	0.0639183	LOC120423732	0.0248883	CTRY007968	0.127794
Down	LOC5571609	4.10531	LOC115268366	3.62481	LOC120423741	6.97572	CTRY007971	5.05263
Down	LOC5571641	0.603853	LOC109419082	0.106398	LOC120428534	0.0774076	CTRY005347	0.1177
Down	LOC5571645	0.224158	LOC109408104	0.0444749	LOC120428542	0.153088	CTRY005350	0.256309
Down	LOC5571664	0.481979	LOC109408124	1.85996	LOC120413089	3.03779	CTRY005559	6.83508
Down	LOC5571677	0.186276	LOC109408138	0.0241191	LOC120413113	0.00802519	CTRY005553	0.0209084
Down	LOC5571685	6.34549	LOC109418122	3.42508	LOC120426394	5.93854	CTRY008885	0.898161
Down	LOC5571696	0.0821517	LOC115253635	0.0455012	LOC120429153	0.0823852	CTRY009464	0.149784
Down	LOC5571703	0.0937331	LOC109408031	0.192496	LOC120429150	0.0706014	CTRY009463	0.130858
Down	LOC5571755	0.926724	LOC115268944	0.0912305	LOC120419430	0.761682	CTRY006076	0.447729
Down	LOC5571763	1.33218	LOC109621276	1.05958	LOC120429775	1.43935	CTRY008829	2.24351
Down	LOC5571766	0.068081	LOC109409433	0.0615236	LOC120424180	0.0671475	CTRY008835	0.0668709
Down	LOC5571779	0.184003	LOC109622561	0.0326149	LOC120424190	0.135006	CTRY008846	0.11788
Down	LOC5571783	0.506332	LOC109430224	0.361501	LOC120416088	0.572633	CTRY002550	0.846611
Down	LOC5571785	3.13865	LOC109410081	3.20897	LOC120416386	2.91833	CTRY002548	0.780642
Down	LOC5571789	0.723238	LOC109405114	0.863211	LOC120415975	1.42442	CTRY002547	1.60562
Down	LOC5571804	0.158134	LOC115253538	0.264454	LOC120420202	0.142117	CTRY000574	0.133201
Down	LOC5571825	0.715121	LOC115265270	0.428897	LOC120429259	0.507619	CTRY009269	1.5858
Down	LOC5571828	9.3719	LOC109426670	1.54248	LOC120429261	0.495327	CTRY009275	0.0620043
Down	LOC5571854	1.00985	LOC109404804	0.291938	LOC120422402	0.617127	CTRY004118	0.758291
Down	LOC5571878	0.301981	LOC109401167	0.0393431	LOC120427341	0.198395	CTRY007033	0.0342466
Down	LOC5571879	0.10066	LOC109401170	0.0116889	LOC120427340	0.000507924	CTRY007032	0.14726
Down	LOC5571884	0.0689469	LOC109623253	5.7019e-05	LOC120426856	0	CTRY007039	0.0944485
Down	LOC5571889	0.164195	LOC109621638	0.181777	LOC120414358	0.073141	CTRY012685	0.164023
Down	LOC5571897	0.117112	LOC109621647	0.188676	LOC120414354	0.142219	CTRY012691	0.148342
Down	LOC5571898	0.120468	LOC109621532	0.0571901	LOC120414348	0.046221	CTRY012687	0.0766042
Down	LOC5571900	0.48739	LOC115258105	0.404949	LOC120414326	0.681329	CTRY012688	0.961428
Down	LOC5571906	0.180972	LOC109409843	0.102121	LOC120415870	0.111743	CTRY007851	0.491528
Down	LOC5571907	0.618898	LOC109397131	0.786578	LOC120415869	0.604937	CTRY007849	0.512076
Down	LOC5571908	0.0797705	LOC109409848	0.086783	LOC120429991	0.040126	CTRY007088	0.0852559
Down	LOC5571916	0.0552008	LOC109410739	0.227905	LOC120428796	0.100569	CTRY008013	0.0939077
Down	LOC5571930	0.652127	LOC109410618	0.735318	LOC120415845	0.428383	CTRY007869	0.87509
Down	LOC5571932	0.674424	LOC109405279	0.726936	LOC120423256	0.450427	CTRY006663	2.27776
Down	LOC5571939	0.110185	LOC115258682	0.0501768	LOC120427697	0.00172694	CTRY005885	0.133201
Down	LOC5571944	0.29711	LOC109424474	0.114266	LOC120412642	0.0099553	CTRY009379	0.0497477
Down	LOC5571976	1.46011	LOC109401911	0.812863	LOC120422443	4.76046	CTRY001176	3.2655
Down	LOC5571997	0.735794	LOC109397716	0.143745	LOC120432486	0.0331166	CTRY000907	0.395278
Down	LOC5571998	0.176967	LOC115269531	0.0144258	LOC120432495	0.000812678	CTRY000906	0.000720981
Down	LOC5572008	0.395606	LOC109433005	0.276029	LOC120412825	0.387038	CTRY000898	5.4681
Down	LOC5572011	0.401992	LOC134283993	0.059984	LOC120412590	0.135108	CTRY000897	0.505948
Down	LOC5572023	0.687304	LOC109424954	0.256244	LOC120432232	0.68336	CTRY000144	0.912942
Down	LOC5572040	0.0850741	LOC109398203	0.112385	LOC120415204	0.0426656	CTRY007693	0.0201875
Down	LOC5572049	0.693473	LOC109398173	0.710514	LOC120422162	0.336144	CTRY006746	0.776676
Down	LOC5572071	0.775409	LOC109402400	0.0409397	LOC120432440	0.929703	CTRY003970	1.14654
Down	LOC5572081	0.0413465	LOC109399132	0.0680237	LOC120412333	0.0365705	CTRY008068	0.0200072
Down	LOC5572082	0.830934	LOC109399090	0.606112	LOC120432663	0.28718	CTRY008070	0.810202
Down	LOC5572093	0.0963308	LOC109399098	0.117687	LOC120432669	0.108492	CTRY008063	0.315609
Down	LOC5572115	0.136703	LOC134284448	0.150188	LOC120429170	0.061154	CTRY001375	0.124009
Down	LOC5572116	0.0793376	LOC134284447	0.0248033	LOC120429176	0.0553637	CTRY001374	0.0611031
Down	LOC5572119	0.573114	LOC109407707	0.540084	LOC120417987	0.363165	CTRY006533	0.31651
Down	LOC5572161	0.107479	LOC115264094	0.0577033	LOC120429624	0.102499	CTRY002180	0.156813
Down	LOC5572167	0.0940578	LOC109400433	0.0551944	LOC120418340	0.187017	CTRY003277	0.42664
Down	LOC5572195	0.877909	LOC109398023	0.588265	LOC120413403	0.669342	CTRY010647	0.553533
Down	LOC5572201	0.134755	LOC109431704	0.131315	LOC120413382	0.267168	CTRY010651	0.0674117
Down	LOC5572208	0.166468	LOC109431665	0.146824	LOC120413390	0.0639984	CTRY010657	0.165465
Down	LOC5572209	0.969694	LOC109431683	1.75345	LOC120413424	0.338988	CTRY010658	0.907174
Down	LOC5572218	0.271674	LOC109419159	0.017847	LOC120418996	0	CTRY012130	0.0129776
Down	LOC5572224	0.424938	LOC109422358	0.565914	LOC120418459	0.212515	CTRY006933	0.294521
Down	LOC5572228	0.153588	LOC109422356	0.116775	LOC120418446	0.569992	CTRY006934	0.0396539
Down	LOC5572242	0.123065	LOC109418266	0.0981868	LOC120427019	0.229378	CTRY012546	0.142574
Down	LOC5572255	0.507306	LOC109397774	0.340689	LOC120421354	0.329033	CTRY006129	1.22621
Down	LOC5572257	9.9277	LOC115258128	18.438	LOC120421359	4.0446	CTRY006126	11.8794
Down	LOC5572265	0.234441	LOC115267498	0.233835	LOC120413389	0.0987404	CTRY010671	0.109048
Down	LOC5572277	0.199156	LOC109430952	0.0816513	LOC120419544	0.0160504	CTRY010282	0.0652487
Down	LOC5572284	40.5496	LOC109431664	17.0103	LOC120426782	32.9443	CTRY010286	18.9717
Down	LOC5572285	1.31962	LOC109431682	0.467784	LOC120426785	1.07334	CTRY010288	5.83472
Down	LOC5572295	0.23758	LOC109431629	0.254476	LOC120423616	0.112353	CTRY009894	0.388969
Down	LOC5572308	0.621712	LOC109402833	0.392633	LOC128092259	0.334112	CTRY011160	0.683129
Down	LOC5572314	0.108453	LOC109408940	0.0631201	LOC120418118	0.0625762	CTRY001416	0.111572
Down	LOC5572323	0.163654	LOC109422614	0.137872	LOC120417888	0.181633	CTRY011156	0.273432
Down	LOC5572335	0.29895	LOC115267045	0.225453	LOC120427148	0.18976	CTRY002485	0.864816
Down	LOC5572347	1.03128	LOC109409984	0.687935	LOC120420562	0.733645	CTRY009002	2.11734
Down	LOC5572365	33.314	LOC109431049	13.4311	LOC120427769	18.9555	CTRY006987	22.6822
Down	LOC5572372	16.7009	LOC115266806	40.9896	LOC120422041	4.02316	CTRY004385	12.7947
Down	LOC5572383	0.61879	LOC109422119	0.654236	LOC120427227	0.768488	CTRY001550	1.09968
Down	LOC5572430	0.150666	LOC109417135	0.0671114	LOC120416280	0.0682649	CTRY004822	0.186914
Down	LOC5572432	0.233792	LOC109417181	0.0850154	LOC120419803	0.236692	CTRY005726	0.324081
Down	LOC5572448	2.13335	LOC109407386	0.0768617	LOC120420516	0.0334214	CTRY004513	1.84102
Down	LOC5572463	0.595194	LOC109419733	0.487399	LOC120416771	0.433462	CTRY004641	0.899423
Down	LOC5572464	0.13508	LOC109419734	0.275516	LOC120416777	0.0943722	CTRY004640	0.0710166
Down	LOC5572468	0.0725187	LOC109419737	0.266051	LOC120416803	0.0372816	CTRY004636	0.0355083
Down	LOC5572478	0.811343	LOC109406732	1.26354	LOC120426655	0.444027	CTRY004200	1.77974
Down	LOC5572484	0.096439	LOC109406727	0.0782871	LOC120424064	0.281796	CTRY006055	0.0623648
Down	LOC5572501	0.0994696	LOC109420867	0.157658	LOC120415777	0.0697887	CTRY009636	0.140591
Down	LOC5572504	0.0953566	LOC109420866	0.106169	LOC120415789	0.0938643	CTRY009642	0.164023
Down	LOC5572507	1.26496	LOC109418229	0.0883225	LOC120423949	0.151056	CTRY012581	0.159156
Down	LOC5572513	1.77411	LOC109427990	0.674934	LOC120423952	0.0791345	CTRY012586	2.97386
Down	LOC5572519	0.970018	LOC109418213	0.00946516	LOC120423936	0.139171	CTRY012595	0
Down	LOC5572521	1.01331	LOC109427980	3.15298	LOC120423940	24.5669	CTRY012594	1.71179
Down	LOC5572522	0.55374	LOC109427975	1.5703	LOC120423937	0.0985372	CTRY012592	0.293619
Down	LOC5572538	0.325143	LOC109430975	0.233664	LOC120416063	0.101788	CTRY009902	0.387527
Down	LOC5572543	0.0691633	LOC109409456	0.0805679	LOC120430982	0.138562	CTRY000449	0.0136986
Down	LOC5572547	0.266046	LOC115256851	0.0968754	LOC120430775	1.38318	CTRY000450	1.03208
Down	LOC5572548	0.181621	LOC109409462	0.11267	LOC120430683	0.231715	CTRY000454	0.0288392
Down	LOC5572552	0.096872	LOC109622056	0.0310754	LOC120413803	0.027631	CTRY011535	0.113735
Down	LOC5572563	0.0785799	LOC109405024	0.0635762	LOC120413798	0.0831979	CTRY011533	0.0719178
[truncated: 782 more rows]
