# Supplementary material for: Midgut cell atlas and virome of four important mosquito species and immune landscapes of dengue virus infection
Source: Research Square preprint supplement (doi:10.21203/rs.3.rs-7214530/v1), 2025-08-11
Supplement: Supplementary file 5 [file c5f5af7793c51ba66b6447e2.xlsx]

## Sheet: aae_vs_alb
Cluster	Ae. aegypti	Ae. albopictus (Ctrl)	NCBI|VectorBase ID of Ae. aegypti orthologs	Regulation	de_coef	de_se	de_pval
ISC/EB-1	LOC5577042	LOC109405102	LOC5577042|AAEL012964	Up	3.04829	0.0868419	7.67433e-07
ISC/EB-1	LOC5565624	LOC109407944	LOC5565624|AAEL014292	Up	2.88582	0.0520892	1.60665e-08
ISC/EB-1	LOC5565474	LOC115263538	LOC5565474|AAEL002495	Up	2.62084	0.0805961	8.8141e-08
ISC/EB-1	LOC110675609	LOC115265344	LOC110675609|AAEL021795	Up	2.51722	0.0645304	3.75213e-07
ISC/EB-1	LOC5572513	LOC109427990	LOC5572513|AAEL009850	Up	2.2131	0.124021	1.03573e-05
ISC/EB-1	LOC5568403	LOC115264856	LOC5568403|AAEL006820	Up	2.18375	0.0803015	4.62446e-07
ISC/EB-1	LOC5576744	LOC109407728	LOC5576744|AAEL024536	Up	2.11834	0.025832	5.85538e-08
ISC/EB-1	LOC5571828	LOC109426670	LOC5571828|AAEL001690	Up	2.09632	0.131028	1.19632e-05
ISC/EB-1	LOC5569529	LOC109411702	LOC5569529|AAEL007699	Up	1.94255	0.0252144	1.03352e-08
ISC/EB-1	LOC110675610	LOC115265356	LOC110675610|AAEL026008	Up	1.9373	0.05713	1.83858e-06
ISC/EB-1	LOC110676279	LOC115261752	LOC110676279|AAEL021140	Up	1.88583	0.0598628	9.6615e-07
ISC/EB-1	LOC5567342	LOC109421195	LOC5567342|AAEL006006	Up	1.86336	0.126184	6.23683e-06
ISC/EB-1	LOC5575800	LOC109401784	LOC5575800|AAEL012078	Up	1.78573	0.111555	1.69262e-06
ISC/EB-1	LOC5578207	LOC109407818	LOC5578207|AAEL003462	Up	1.76374	0.135274	6.96259e-06
ISC/EB-1	LOC5564874	LOC134291440	LOC5564874|AAEL004460	Up	1.73339	0.113293	1.817e-05
ISC/EB-1	LOC110678734	LOC109425568	LOC110678734|AAEL019403	Up	1.70396	0.027688	4.88401e-07
ISC/EB-1	LOC5579871	LOC109404752	LOC5579871|AAEL005985	Up	1.65185	0.115832	1.39297e-06
ISC/EB-1	LOC5570050	LOC109399541	LOC5570050|AAEL000185	Up	1.5097	0.0866349	1.53988e-06
ISC/EB-1	LOC5565048	LOC109406923	LOC5565048|AAEL004567	Up	1.46108	0.105856	3.12938e-05
ISC/EB-1	LOC5570461	LOC109418026	LOC5570461|AAEL008356	Up	1.4486	0.112999	5.44171e-05
ISC/EB-1	LOC5566800	LOC109402109	LOC5566800|AAEL005651	Up	1.44704	0.102099	1.23043e-05
ISC/EB-1	LOC5567214	LOC134289566	LOC5567214|AAEL028205	Up	1.42477	0.0977236	1.74775e-06
ISC/EB-1	LOC5565405	LOC109407918	LOC5565405|AAEL014843	Up	1.42317	0.0667983	3.80844e-06
ISC/EB-1	LOC5572735	LOC109621585	LOC5572735|AAEL010012	Up	1.39382	0.0876537	5.75702e-06
ISC/EB-1	LOC5565108	LOC109399284	LOC5565108|AAEL004586	Up	1.37562	0.115913	1.59896e-05
ISC/EB-1	LOC5571997	LOC109397716	LOC5571997|AAEL009487	Up	1.35574	0.0989688	2.63365e-06
ISC/EB-1	LOC5569750	LOC109404691	LOC5569750|AAEL007915	Up	1.35266	0.08897	5.20871e-06
ISC/EB-1	LOC5569590	LOC109416014	LOC5569590|AAEL001247	Up	1.3488	0.106057	1.38744e-05
ISC/EB-1	LOC5573858	LOC115258746	LOC5573858|AAEL010782	Up	1.34338	0.122895	8.52364e-05
ISC/EB-1	LOC5566864	LOC109408984	LOC5566864|AAEL000847	Up	1.34332	0.124412	2.73966e-05
ISC/EB-1	LOC5576124	LOC115259220	LOC5576124|AAEL002811	Up	1.33434	0.143197	2.01973e-05
ISC/EB-1	LOC5573328	LOC109416369	LOC5573328|AAEL010411	Up	1.32277	0.095524	2.29918e-05
ISC/EB-1	LOC5564056	LOC109431389	LOC5564056|AAEL004059	Up	1.30207	0.0613476	3.20425e-07
ISC/EB-1	LOC5577316	LOC109417191	LOC5577316|AAEL013163	Up	1.29233	0.0985118	2.24027e-06
ISC/EB-1	LOC5570020	LOC134289877	LOC5570020|AAEL000182	Up	1.28308	0.130592	2.72859e-05
ISC/EB-1	LOC5575011	LOC109414777	LOC5575011|AAEL011564	Up	1.25196	0.13654	1.42509e-05
ISC/EB-1	LOC5571039	LOC115263355	LOC5571039|AAEL008784	Up	1.24887	0.126461	1.99599e-05
ISC/EB-1	LOC5570591	LOC109397641	LOC5570591|AAEL008408	Up	1.24323	0.12591	3.30481e-05
ISC/EB-1	LOC5572285	LOC109431682	LOC5572285|AAEL001779	Up	1.22359	0.10431	8.26188e-06
ISC/EB-1	LOC5572931	LOC109432900	LOC5572931|AAEL010145	Up	1.18626	0.0819734	1.92196e-06
ISC/EB-1	LOC5576764	LOC115267731	LOC5576764|AAEL012750	Up	1.18017	0.127209	4.94414e-05
ISC/EB-1	LOC5565544	LOC109413463	LOC5565544|AAEL004855	Up	1.16129	0.0232546	8.71316e-08
ISC/EB-1	LOC5574612	LOC109412718	LOC5574612|AAEL011255	Up	1.15499	0.091683	2.19183e-05
ISC/EB-1	LOC5572923	LOC109432898	LOC5572923|AAEL010146	Up	1.15447	0.131983	6.32973e-06
ISC/EB-1	LOC5568583	LOC109425830	LOC5568583|AAEL001113	Up	1.14693	0.14496	6.86995e-05
ISC/EB-1	LOC5568076	LOC109411683	LOC5568076|AAEL006520	Up	1.14403	0.1095	1.17023e-05
ISC/EB-1	LOC5575642	LOC109405470	LOC5575642|AAEL011985	Up	1.14243	0.0909334	2.31801e-05
ISC/EB-1	LOC5575983	LOC109397805	LOC5575983|AAEL012233	Up	1.12453	0.100857	2.39822e-05
ISC/EB-1	LOC5575831	LOC109413226	LOC5575831|AAEL012099	Up	1.11574	0.0827275	9.01119e-06
ISC/EB-1	LOC5566316	LOC109397407	LOC5566316|AAEL005305	Up	1.10688	0.100468	1.4932e-05
ISC/EB-1	LOC5569309	LOC109414312	LOC5569309|AAEL007556	Up	1.09123	0.141446	5.30166e-05
ISC/EB-1	LOC5570932	LOC115266368	LOC5570932|AAEL008671	Up	1.08889	0.128147	8.09317e-05
ISC/EB-1	LOC5566687	LOC109407580	LOC5566687|AAEL005558	Up	1.08743	0.0703562	4.6706e-06
ISC/EB-1	LOC5576220	LOC134291861	LOC5576220|AAEL002834	Up	1.08577	0.0791037	1.18384e-05
ISC/EB-1	LOC5572672	LOC109420136	LOC5572672|AAEL001852	Up	1.08218	0.0725043	1.07514e-05
ISC/EB-1	LOC5570090	LOC109418954	LOC5570090|AAEL001356	Up	1.08052	0.142346	2.97293e-05
ISC/EB-1	LOC5568292	LOC109426592	LOC5568292|AAEL006721	Up	1.07347	0.111433	6.43453e-05
ISC/EB-1	LOC5574190	LOC109622219	LOC5574190|AAEL002308	Up	1.05884	0.0964686	4.99647e-06
ISC/EB-1	LOC5566087	LOC109427648	LOC5566087|AAEL005165	Up	1.05534	0.0535524	2.3525e-05
ISC/EB-1	LOC5570924	LOC109401373	LOC5570924|AAEL026751	Up	1.04831	0.116125	3.99481e-05
ISC/EB-1	LOC5566751	LOC115253966	LOC5566751|AAEL015238	Up	1.04827	0.106835	7.70943e-05
ISC/EB-1	LOC5579654	LOC109424429	LOC5579654|AAEL003970	Up	1.04712	0.1309	4.33313e-05
ISC/EB-1	LOC5570996	LOC109418544	LOC5570996|AAEL008723	Up	1.04421	0.109956	1.96009e-05
ISC/EB-1	LOC5573370	LOC109429778	LOC5573370|AAEL010470	Up	1.03659	0.133544	1.78778e-05
ISC/EB-1	LOC5579796	LOC115253931	LOC5579796|AAEL003976	Up	1.02245	0.11278	1.55309e-05
ISC/EB-1	LOC5567163	LOC109398833	LOC5567163|AAEL005901	Up	1.01583	0.0249307	1.97048e-07
ISC/EB-1	LOC5576650	LOC109428068	LOC5576650|AAEL012684	Up	1.01225	0.0916185	9.12906e-05
ISC/EB-1	LOC5577421	LOC109420080	LOC5577421|AAEL003151	Up	0.981141	0.125923	2.42974e-05
ISC/EB-1	LOC5578090	LOC109398778	LOC5578090|AAEL003415	Up	0.924083	0.114871	2.53676e-05
ISC/EB-1	LOC5569288	LOC109621284	LOC5569288|AAEL007547	Up	0.915927	0.122434	1.38717e-05
ISC/EB-1	LOC5565700	LOC109412353	LOC5565700|AAEL004930	Up	0.913501	0.1085	2.78716e-05
ISC/EB-1	LOC5572753	LOC109407929	LOC5572753|AAEL010018	Up	0.912765	0.0718084	1.87145e-05
ISC/EB-1	LOC5570930	LOC109428250	LOC5570930|AAEL008672	Up	0.910762	0.151319	0.00012453
ISC/EB-1	LOC5575301	LOC109405035	LOC5575301|AAEL023523	Up	0.9062	0.107454	7.72432e-05
ISC/EB-1	LOC5571304	LOC109410132	LOC5571304|AAEL008953	Up	0.898534	0.0661062	8.74122e-06
ISC/EB-1	LOC5573583	LOC109429125	LOC5573583|AAEL002130	Up	0.897814	0.0832241	0.000488799
ISC/EB-1	LOC5575338	LOC109403400	LOC5575338|AAEL002615	Up	0.888727	0.11969	0.000125748
ISC/EB-1	LOC5573374	LOC109430715	LOC5573374|AAEL010464	Up	0.888369	0.0874484	2.5053e-05
ISC/EB-1	LOC5568331	LOC109428427	LOC5568331|AAEL001094	Up	0.87648	0.116636	4.38575e-05
ISC/EB-1	LOC5569950	LOC109415649	LOC5569950|AAEL008039	Up	0.874888	0.0767967	1.43182e-05
ISC/EB-1	LOC5568586	LOC109425828	LOC5568586|AAEL001101	Up	0.86909	0.148967	0.000243462
ISC/EB-1	LOC5573878	LOC109422588	LOC5573878|AAEL010799	Up	0.858965	0.159699	0.000146358
ISC/EB-1	LOC5574701	LOC109409472	LOC5574701|AAEL027910	Up	0.857135	0.113608	2.85366e-05
ISC/EB-1	LOC5579472	LOC115254562	LOC5579472|AAEL007650	Up	0.853237	0.104572	7.94119e-06
ISC/EB-1	LOC110679353	LOC109401240	LOC110679353|AAEL025697	Up	0.849322	0.0904268	1.5362e-05
ISC/EB-1	LOC5579101	LOC109399110	LOC5579101|AAEL003842	Up	0.848506	0.119421	0.000177438
ISC/EB-1	LOC5566228	LOC115255627	LOC5566228|AAEL005266	Up	0.844007	0.0194695	7.5649e-06
ISC/EB-1	LOC5574667	LOC109426220	LOC5574667|AAEL011302	Up	0.836076	0.0660587	3.45332e-06
ISC/EB-1	LOC5579505	LOC134287966	LOC5579505|AAEL015136	Up	0.832873	0.11613	5.52045e-05
ISC/EB-1	LOC5564161	LOC109407834	LOC5564161|AAEL004148	Up	0.822937	0.0897046	2.09557e-05
ISC/EB-1	LOC5577997	LOC109402035	LOC5577997|AAEL003385	Up	0.822102	0.152481	0.00015494
ISC/EB-1	LOC5571825	LOC115265270	LOC5571825|AAEL001698	Up	0.814555	0.113307	0.000100535
ISC/EB-1	LOC5568481	LOC109423339	LOC5568481|AAEL006879	Up	0.804451	0.128657	4.40038e-05
ISC/EB-1	LOC5564185	LOC109413806	LOC5564185|AAEL014335	Up	0.798037	0.149121	0.000202922
ISC/EB-1	LOC5574634	LOC109414996	LOC5574634|AAEL020739	Up	0.792273	0.104875	6.98715e-05
ISC/EB-1	LOC5565836	LOC109429695	LOC5565836|AAEL005017	Up	0.787917	0.133983	0.000169796
ISC/EB-1	LOC5574614	LOC109412721	LOC5574614|AAEL011248	Up	0.782943	0.122178	0.00014569
ISC/EB-1	LOC5576468	LOC109397596	LOC5576468|AAEL002903	Up	0.779107	0.11651	6.89453e-05
ISC/EB-1	LOC5564525	LOC109429796	LOC5564525|AAEL014492	Up	0.757613	0.149515	0.000119904
ISC/EB-1	LOC5570443	LOC109407308	LOC5570443|AAEL008336	Up	0.734945	0.154724	0.000877854
ISC/EB-1	LOC5571854	LOC109404804	LOC5571854|AAEL009345	Up	0.732318	0.112827	0.000145806
ISC/EB-1	LOC5568112	LOC109398638	LOC5568112|AAEL006566	Up	0.730511	0.165076	0.000405975
ISC/EB-1	LOC5571461	LOC109432412	LOC5571461|AAEL009092	Up	0.728779	0.0959178	4.17428e-05
ISC/EB-1	LOC5565148	LOC109413335	LOC5565148|AAEL004620	Up	0.720346	0.11144	8.65917e-05
ISC/EB-1	LOC5575137	LOC109400747	LOC5575137|AAEL000378	Up	0.712796	0.164075	0.000430298
ISC/EB-1	LOC5580095	LOC109412594	LOC5580095|AAEL002137	Up	0.711609	0.141617	4.59856e-05
ISC/EB-1	LOC110675611	LOC115265355	LOC110675611|AAEL026833	Up	0.710013	0.074954	9.81012e-05
ISC/EB-1	LOC5572534	LOC109431657	LOC5572534|AAEL009859	Up	0.709924	0.0404664	1.42666e-06
ISC/EB-1	LOC5577227	LOC109412925	LOC5577227|AAEL003130	Up	0.705683	0.10675	0.000129851
ISC/EB-1	LOC5577524	LOC109412434	LOC5577524|AAEL003203	Up	0.695992	0.0724206	8.30556e-06
ISC/EB-1	LOC5571387	LOC109622784	LOC5571387|AAEL009026	Up	0.694871	0.08994	3.33252e-05
ISC/EB-1	LOC5578793	LOC109398643	LOC5578793|AAEL003676	Up	0.69196	0.0684966	3.38645e-05
ISC/EB-1	LOC5569566	LOC109422035	LOC5569566|AAEL007752	Up	0.689305	0.063911	1.29746e-05
ISC/EB-1	LOC5566220	LOC115265746	LOC5566220|AAEL005270	Up	0.689166	0.0734862	2.97132e-05
ISC/EB-1	LOC5563589	LOC109415495	LOC5563589|AAEL000090	Up	0.679963	0.125676	0.000213876
ISC/EB-1	LOC5576966	LOC109420035	LOC5576966|AAEL003060	Up	0.679207	0.0590142	2.09604e-05
ISC/EB-1	LOC5570214	LOC109426339	LOC5570214|AAEL008154	Up	0.678585	0.133928	0.000273378
ISC/EB-1	LOC5564516	LOC109623132	LOC5564516|AAEL004284	Up	0.67829	0.0824413	0.000137237
ISC/EB-1	LOC5564517	LOC109417965	LOC5564517|AAEL004291	Up	0.67452	0.162572	0.000787218
ISC/EB-1	LOC5575550	LOC109410823	LOC5575550|AAEL002661	Up	0.673105	0.116795	0.000309734
ISC/EB-1	LOC5567160	LOC109398869	LOC5567160|AAEL005910	Up	0.67084	0.146083	0.000249144
ISC/EB-1	LOC5568938	LOC109409140	LOC5568938|AAEL007246	Up	0.67009	0.15189	0.00057304
ISC/EB-1	LOC5578146	LOC109417113	LOC5578146|AAEL013527	Up	0.668078	0.0971408	0.000112556
ISC/EB-1	LOC5572008	LOC109433005	LOC5572008|AAEL009483	Up	0.666637	0.127159	0.000154553
ISC/EB-1	LOC5565878	LOC109429927	LOC5565878|AAEL000679	Up	0.663888	0.0876961	6.51669e-05
ISC/EB-1	LOC23687502	LOC109401390	LOC23687502|AAEL017082	Up	0.661954	0.151186	0.000515231
ISC/EB-1	LOC5568166	LOC109398308	LOC5568166|AAEL006609	Up	0.659245	0.143057	0.000389124
ISC/EB-1	LOC5567341	LOC109411771	LOC5567341|AAEL006011	Up	0.656829	0.0564836	3.13032e-05
ISC/EB-1	LOC5564469	LOC109404943	LOC5564469|AAEL014452	Up	0.654548	0.133299	0.000202694
ISC/EB-1	LOC5576472	LOC134285145	LOC5576472|AAEL002886	Up	0.641473	0.0697636	6.25006e-05
ISC/EB-1	LOC5570312	LOC115257197	LOC5570312|AAEL008249	Up	0.640611	0.166262	0.00124492
ISC/EB-1	LOC5579190	LOC109414512	LOC5579190|AAEL003899	Up	0.631006	0.175615	0.000936293
ISC/EB-1	LOC5568502	LOC109431907	LOC5568502|AAEL019567	Up	0.630379	0.154863	0.00053232
ISC/EB-1	LOC5572994	LOC115254133	LOC5572994|AAEL001937	Up	0.627209	0.153854	0.000580258
ISC/EB-1	LOC5578276	LOC115267037	LOC5578276|AAEL003503	Up	0.626094	0.128141	0.00025718
ISC/EB-1	LOC5564787	LOC109417150	LOC5564787|AAEL004435	Up	0.624233	0.145309	0.000317574
ISC/EB-1	LOC5565891	LOC109429540	LOC5565891|AAEL000706	Up	0.616209	0.0901131	0.00106999
ISC/EB-1	LOC5570080	LOC109431766	LOC5570080|AAEL001336	Up	0.614461	0.118724	0.000189293
ISC/EB-1	LOC5573292	LOC109408666	LOC5573292|AAEL010371	Up	0.611385	0.166337	0.00119459
ISC/EB-1	LOC5578596	LOC109399409	LOC5578596|AAEL013778	Up	0.607976	0.147172	0.000533534
ISC/EB-1	LOC110678983	LOC115271083	LOC110678983|AAEL025807	Up	0.607524	0.146215	0.000733261
ISC/EB-1	LOC5580280	LOC109407473	LOC5580280|AAEL003006	Up	0.602799	0.103555	0.000192977
ISC/EB-1	LOC5576244	LOC109422254	LOC5576244|AAEL002851	Up	0.602396	0.0577145	3.73754e-05
ISC/EB-1	LOC5575715	LOC109431784	LOC5575715|AAEL012026	Up	0.601174	0.0613015	2.16624e-05
ISC/EB-1	LOC5573418	LOC109404924	LOC5573418|AAEL002083	Up	0.600349	0.050941	1.7911e-06
ISC/EB-1	LOC5567961	LOC109421631	LOC5567961|AAEL006420	Up	0.596845	0.145869	0.000423224
ISC/EB-1	LOC5572799	LOC134287652	LOC5572799|AAEL001904	Up	0.588432	0.133568	0.000284884
ISC/EB-1	LOC23687735	LOC109400776	LOC23687735|AAEL017315	Up	0.583666	0.0915387	7.27539e-05
ISC/EB-1	LOC5568890	LOC109404843	LOC5568890|AAEL007197	Up	0.581752	0.112623	0.000149815
ISC/EB-1	LOC5571153	LOC109427897	LOC5571153|AAEL008849	Up	0.577321	0.132332	0.000433343
ISC/EB-1	LOC5577996	LOC109413708	LOC5577996|AAEL003396	Up	0.575543	0.0187816	3.76115e-05
ISC/EB-1	LOC5569083	LOC109421653	LOC5569083|AAEL001209	Up	0.570387	0.168739	0.00225475
ISC/EB-1	LOC5578303	LOC109404988	LOC5578303|AAEL013613	Up	0.569757	0.163446	0.00231907
ISC/EB-1	LOC5574180	LOC109403180	LOC5574180|AAEL002304	Up	0.569561	0.146136	0.000722658
ISC/EB-1	LOC5578243	LOC115268659	LOC5578243|AAEL015006	Up	0.562916	0.0183687	6.8374e-08
ISC/EB-1	LOC5568319	LOC109406578	LOC5568319|AAEL006727	Up	0.56273	0.166707	0.00189978
ISC/EB-1	LOC5569026	LOC115266598	LOC5569026|AAEL007322	Up	0.55955	0.130384	0.00053564
ISC/EB-1	LOC5574542	LOC109428654	LOC5574542|AAEL011216	Up	0.557884	0.132965	0.000658151
ISC/EB-1	LOC5572725	LOC109621625	LOC5572725|AAEL009994	Up	0.551581	0.027448	2.61413e-06
ISC/EB-1	LOC5566772	LOC109397884	LOC5566772|AAEL005629	Up	0.547227	0.0178056	2.53701e-06
ISC/EB-1	LOC5571483	LOC109427678	LOC5571483|AAEL001604	Up	0.546021	0.167077	0.00253194
ISC/EB-1	LOC5578455	LOC109403738	LOC5578455|AAEL000500	Up	0.537256	0.148737	0.00115217
ISC/EB-1	LOC5579326	LOC109621587	LOC5579326|AAEL015575	Up	0.537109	0.155414	0.00198168
ISC/EB-1	LOC5572432	LOC109417181	LOC5572432|AAEL001810	Up	0.534464	0.169144	0.0027011
ISC/EB-1	LOC5574731	LOC109404650	LOC5574731|AAEL011371	Up	0.527443	0.097312	0.000152221
ISC/EB-1	LOC110674166	LOC115269183	LOC110674166|AAEL020485	Up	0.523146	0.134477	0.000938446
ISC/EB-1	LOC5574458	LOC109408684	LOC5574458|AAEL011180	Up	0.504644	0.047475	9.43077e-06
ISC/EB-1	LOC5566808	LOC115254988	LOC5566808|AAEL005655	Up	0.504065	0.177935	0.00579884
ISC/EB-1	LOC5567305	LOC109412613	LOC5567305|AAEL005956	Up	0.503882	0.161325	0.00239952
ISC/EB-1	LOC5574526	LOC115253654	LOC5574526|AAEL011197	Up	0.499942	0.0332433	1.3023e-05
ISC/EB-1	LOC5564768	LOC109417152	LOC5564768|AAEL004434	Up	0.488702	0.0571447	3.39261e-05
ISC/EB-1	LOC5570245	LOC109399839	LOC5570245|AAEL023182	Up	0.480552	0.163257	0.00319936
ISC/EB-1	LOC5573763	LOC115265304	LOC5573763|AAEL000269	Up	0.480204	0.0315672	1.0177e-05
ISC/EB-1	LOC5575274	LOC109413576	LOC5575274|AAEL011746	Up	0.463667	0.115001	0.000622612
ISC/EB-1	LOC5573830	LOC109401290	LOC5573830|AAEL010754	Up	0.462031	0.0442304	5.26424e-05
ISC/EB-1	LOC5570054	LOC109405475	LOC5570054|AAEL000186	Up	0.460887	0.12593	0.000870108
ISC/EB-1	LOC5567194	LOC109432313	LOC5567194|AAEL000859	Up	0.460742	0.144831	0.00248985
ISC/EB-1	LOC5578459	LOC109403729	LOC5578459|AAEL000486	Up	0.460688	0.0734579	8.92719e-05
ISC/EB-1	LOC110679583	LOC115256000	LOC110679583|AAEL023591	Up	0.455056	0.0963253	0.000343344
ISC/EB-1	LOC5571564	LOC115260570	LOC5571564|AAEL009151	Up	0.455003	0.0194322	2.31247e-06
ISC/EB-1	LOC5565652	LOC109397340	LOC5565652|AAEL004902	Up	0.453144	0.133069	0.00192737
ISC/EB-1	LOC5567091	LOC109406022	LOC5567091|AAEL012313	Up	0.45149	0.106492	0.000387401
ISC/EB-1	LOC5567531	LOC109413665	LOC5567531|AAEL027977	Up	0.45081	0.171914	0.00739852
ISC/EB-1	LOC5576488	LOC109403530	LOC5576488|AAEL002900	Up	0.447974	0.113148	0.00084598
ISC/EB-1	LOC5572548	LOC109409462	LOC5572548|AAEL009874	Up	0.444104	0.176411	0.0127974
ISC/EB-1	LOC5568247	LOC109405902	LOC5568247|AAEL006663	Up	0.443751	0.180868	0.015197
ISC/EB-1	LOC5572255	LOC109397774	LOC5572255|AAEL009681	Up	0.443637	0.116224	0.00113779
ISC/EB-1	LOC110675318	LOC109422005	LOC110675318|-	Up	0.440721	0.151244	0.0039992
ISC/EB-1	LOC5569504	LOC115258013	LOC5569504|AAEL018144	Up	0.440711	0.158844	0.00519896
ISC/EB-1	LOC5566976	LOC109402491	LOC5566976|AAEL005744	Up	0.439965	0.0836336	0.000179307
ISC/EB-1	LOC5573866	LOC109423478	LOC5573866|AAEL010784	Up	0.439543	0.178515	0.0165967
ISC/EB-1	LOC5568465	LOC109621632	LOC5568465|AAEL006860	Up	0.433836	0.02202	6.60693e-06
ISC/EB-1	LOC5564477	LOC109420918	LOC5564477|AAEL014484	Up	0.432573	0.103115	0.000708896
ISC/EB-1	LOC23687516	LOC109418072	LOC23687516|AAEL017096	Up	0.427372	0.0211829	6.20646e-07
ISC/EB-1	LOC5577489	LOC109418556	LOC5577489|AAEL013229	Up	0.427323	0.0872021	7.56713e-05
ISC/EB-1	LOC5579186	LOC109404863	LOC5579186|AAEL003872	Up	0.424903	0.0229485	1.03034e-06
ISC/EB-1	LOC5573885	LOC115253981	LOC5573885|AAEL010798	Up	0.423525	0.102154	0.000687521
ISC/EB-1	LOC5578376	LOC109428579	LOC5578376|AAEL019481	Up	0.413591	0.180717	0.0177964
ISC/EB-1	LOC5566824	LOC109423129	LOC5566824|AAEL022609	Up	0.412435	0.0837621	0.000335378
ISC/EB-1	LOC5575428	LOC109426544	LOC5575428|AAEL011832	Up	0.411964	0.147321	0.00619876
ISC/EB-1	LOC5579853	LOC109399010	LOC5579853|AAEL005845	Up	0.411386	0.101951	0.000774998
ISC/EB-1	LOC5578389	LOC109428364	LOC5578389|AAEL013679	Up	0.409084	0.136189	0.00319936
ISC/EB-1	LOC5571208	LOC109432273	LOC5571208|AAEL008893	Up	0.408509	0.107594	0.000959289
ISC/EB-1	LOC5565629	LOC109423532	LOC5565629|AAEL014913	Up	0.40635	0.0969353	0.000576378
ISC/EB-1	LOC5565962	LOC109423643	LOC5565962|AAEL005220	Up	0.405135	0.0210957	3.95623e-06
ISC/EB-1	LOC5578622	LOC109422142	LOC5578622|AAEL003606	Up	0.403596	0.177779	0.020196
ISC/EB-1	LOC5575037	LOC109421944	LOC5575037|AAEL011587	Up	0.402973	0.0211814	2.9478e-06
ISC/EB-1	LOC5568526	LOC109427321	LOC5568526|AAEL006946	Up	0.400008	0.088964	0.000453811
ISC/EB-1	LOC5568418	LOC109414175	LOC5568418|AAEL006847	Up	0.399254	0.146531	0.00679864
ISC/EB-1	LOC5572195	LOC109398023	LOC5572195|AAEL014715	Up	0.399162	0.064532	0.00012331
ISC/EB-1	LOC5567073	LOC109430360	LOC5567073|AAEL005796	Up	0.396054	0.17214	0.0191962
ISC/EB-1	LOC5578582	LOC115266747	LOC5578582|AAEL013768	Up	0.395566	0.174496	0.0245951
ISC/EB-1	LOC5564117	LOC109407623	LOC5564117|AAEL019408	Up	0.394885	0.077476	0.000296477
ISC/EB-1	LOC5574665	LOC109426215	LOC5574665|AAEL011309	Up	0.389504	0.072488	0.000241011
ISC/EB-1	LOC5569863	LOC115255337	LOC5569863|AAEL007945	Up	0.385212	0.0463146	0.000527361
ISC/EB-1	LOC5568195	LOC109398302	LOC5568195|AAEL006619	Up	0.384706	0.170169	0.020196
ISC/EB-1	LOC5573473	LOC109424721	LOC5573473|AAEL010514	Up	0.383373	0.167845	0.019796
ISC/EB-1	LOC5576765	LOC109428956	LOC5576765|AAEL012746	Up	0.381893	0.0886287	0.000819135
ISC/EB-1	LOC5577107	LOC109417667	LOC5577107|AAEL013002	Up	0.381583	0.182837	0.0331934
ISC/EB-1	LOC5569547	LOC109433182	LOC5569547|AAEL007718	Up	0.379009	0.0774453	0.000463529
ISC/EB-1	LOC5573939	LOC109421315	LOC5573939|AAEL019753	Up	0.378418	0.163232	0.0215957
ISC/EB-1	LOC5569582	LOC109408226	LOC5569582|AAEL007771	Up	0.376486	0.0192928	8.49617e-06
ISC/EB-1	LOC5564925	LOC109426506	LOC5564925|AAEL019568	Up	0.373048	0.0366357	0.000326963
ISC/EB-1	LOC5566959	LOC109422770	LOC5566959|AAEL005722	Up	0.372782	0.0217212	6.53129e-06
ISC/EB-1	LOC5565229	LOC109420360	LOC5565229|AAEL004675	Up	0.370754	0.172306	0.0307938
ISC/EB-1	LOC5575668	LOC109429786	LOC5575668|AAEL002687	Up	0.369607	0.173492	0.0305939
ISC/EB-1	LOC5569144	LOC109407537	LOC5569144|AAEL007392	Up	0.369549	0.0774603	0.000355232
ISC/EB-1	LOC5573217	LOC109425778	LOC5573217|AAEL010299	Up	0.366314	0.0189236	0.000198775
ISC/EB-1	LOC5568611	LOC109430169	LOC5568611|AAEL006976	Up	0.365514	0.124397	0.00459908
ISC/EB-1	LOC5569497	LOC109622877	LOC5569497|AAEL007681	Up	0.364892	0.157644	0.0217956
ISC/EB-1	LOC5574515	LOC109401458	LOC5574515|AAEL019717	Up	0.361552	0.035859	0.000291358
ISC/EB-1	LOC5573963	LOC109401480	LOC5573963|AAEL010826	Up	0.360627	0.0590852	9.37378e-05
ISC/EB-1	LOC5570233	LOC109426322	LOC5570233|AAEL008166	Up	0.354213	0.0800399	0.000366975
ISC/EB-1	LOC5565541	LOC109413483	LOC5565541|AAEL004829	Up	0.351939	0.0793625	0.000278254
ISC/EB-1	LOC5576896	LOC109418604	LOC5576896|AAEL003039	Up	0.351836	0.0594004	0.000194985
ISC/EB-1	LOC5578927	LOC109621513	LOC5578927|AAEL003750	Up	0.344816	0.0400009	0.000110594
ISC/EB-1	LOC5572284	LOC109431664	LOC5572284|AAEL001759	Up	0.343507	0.0192523	8.04375e-05
ISC/EB-1	LOC5577478	LOC109411193	LOC5577478|AAEL013221	Up	0.343491	0.0191032	0.000176079
ISC/EB-1	LOC5580329	LOC109420083	LOC5580329|AAEL013069	Up	0.339215	0.0257033	5.1015e-06
ISC/EB-1	LOC5577456	LOC134291921	LOC5577456|AAEL013199	Up	0.33883	0.154454	0.0279944
ISC/EB-1	LOC5569925	LOC109421982	LOC5569925|AAEL027654	Up	0.338342	0.155016	0.0281944
ISC/EB-1	LOC5576993	LOC109423726	LOC5576993|AAEL003064	Up	0.337667	0.169167	0.0457908
ISC/EB-1	LOC5573827	LOC109621229	LOC5573827|AAEL010756	Up	0.337175	0.0195465	0.000120582
ISC/EB-1	LOC5569787	LOC109412033	LOC5569787|AAEL023098	Up	0.334209	0.112576	0.00419916
ISC/EB-1	LOC110676045	LOC109425736	LOC110676045|AAEL022286	Up	0.333018	0.0191978	0.000186814
ISC/EB-1	LOC5564556	LOC109427514	LOC5564556|AAEL004325	Up	0.329411	0.023081	3.13899e-05
ISC/EB-1	LOC5577139	LOC109420869	LOC5577139|AAEL003125	Up	0.328286	0.140501	0.0153969
ISC/EB-1	LOC5569700	LOC109429880	LOC5569700|AAEL007845	Up	0.326989	0.102555	0.00200159
ISC/EB-1	LOC5563646	LOC109416769	LOC5563646|AAEL021083	Up	0.323947	0.0174891	9.60947e-07
ISC/EB-1	LOC5570433	LOC109420079	LOC5570433|AAEL019748	Up	0.320306	0.108268	0.004999
ISC/EB-1	LOC5570432	LOC109433111	LOC5570432|AAEL008329	Up	0.316071	0.0214091	1.16452e-05
ISC/EB-1	LOC5579901	LOC109410391	LOC5579901|AAEL001052	Up	0.310612	0.110675	0.00559888
ISC/EB-1	LOC5569670	LOC109406360	LOC5569670|AAEL007824	Up	0.308581	0.0215986	4.08728e-05
ISC/EB-1	LOC5572843	LOC109425462	LOC5572843|AAEL010059	Up	0.302355	0.0711063	0.00256748
ISC/EB-1	LOC5572224	LOC109422358	LOC5572224|AAEL009658	Up	0.301312	0.14796	0.0343931
ISC/EB-1	LOC5571500	LOC109431390	LOC5571500|AAEL001623	Up	0.292185	0.0612901	0.00191724
ISC/EB-1	LOC5567660	LOC109416816	LOC5567660|AAEL012740	Up	0.283396	0.0291356	4.80282e-05
ISC/EB-1	LOC5571955	LOC109405894	LOC5571955|AAEL026633	Up	0.283167	0.123134	0.0229954
ISC/EB-1	LOC5572119	LOC109407707	LOC5572119|AAEL009539	Up	0.279122	0.117309	0.0161968
ISC/EB-1	LOC5570159	LOC109414508	LOC5570159|AAEL008131	Up	0.273551	0.13361	0.0355929
ISC/EB-1	LOC23687495	LOC109404332	LOC23687495|AAEL017075	Up	0.265944	0.04557	0.000266282
ISC/EB-1	LOC5574844	LOC109399154	LOC5574844|AAEL011447	Up	0.263877	0.0184366	0.000259397
ISC/EB-1	LOC5567839	LOC109415611	LOC5567839|AAEL001005	Up	0.263632	0.0752436	0.00146118
ISC/EB-1	LOC110676232	LOC109404346	LOC110676232|AAEL023983	Up	0.26302	0.0205639	5.94518e-05
ISC/EB-1	LOC5566236	LOC109409973	LOC5566236|AAEL005269	Up	0.261783	0.0781655	0.00298739
ISC/EB-1	LOC5572791	LOC109427854	LOC5572791|AAEL001896	Up	0.258648	0.0846201	0.00402266
ISC/EB-1	LOC5569968	LOC109425587	LOC5569968|AAEL020092	Up	0.255717	0.0556604	0.000406674
ISC/EB-1	LOC5571803	LOC109427544	LOC5571803|AAEL009330	Up	0.255626	0.109962	0.0195961
ISC/EB-1	LOC23687839	LOC109417743	LOC23687839|AAEL017419	Up	0.253444	0.0482465	0.000316875
ISC/EB-1	LOC5572347	LOC109409984	LOC5572347|AAEL009733	Up	0.248397	0.083689	0.00365037
ISC/EB-1	LOC5569604	LOC109416078	LOC5569604|AAEL001275	Up	0.247056	0.111364	0.0253949
ISC/EB-1	LOC5569005	LOC109416620	LOC5569005|AAEL007282	Up	0.242458	0.126992	0.0489902
ISC/EB-1	LOC5570505	LOC109406436	LOC5570505|AAEL001411	Up	0.228274	0.0783403	0.00419916
ISC/EB-1	LOC5572090	LOC109399102	LOC5572090|AAEL009496	Up	0.224355	0.0220605	2.97951e-05
ISC/EB-1	LOC5578123	LOC109399666	LOC5578123|AAEL003427	Up	0.220207	0.0179676	0.000418667
ISC/EB-1	LOC23687501	LOC109428447	LOC23687501|AAEL017081	Up	0.218394	0.0854607	0.0103979
ISC/EB-1	LOC5566143	LOC109417297	LOC5566143|AAEL005213	Up	0.213052	0.0674427	0.00294615
ISC/EB-1	LOC5569520	LOC109411704	LOC5569520|AAEL007707	Up	0.202744	0.0737581	0.0069986
ISC/EB-1	LOC5572759	LOC109407986	LOC5572759|AAEL010017	Up	0.201903	0.066701	0.00279944
ISC/EB-1	LOC5578839	LOC109432534	LOC5578839|AAEL019482	Up	0.196599	0.0984686	0.0407918
ISC/EB-1	LOC5575085	LOC115267434	LOC5575085|AAEL011641	Up	0.195447	0.0638694	0.00279944
ISC/EB-1	LOC5578734	LOC134289441	LOC5578734|AAEL003661	Up	0.195373	0.093302	0.0329934
ISC/EB-1	LOC5578796	LOC109404395	LOC5578796|AAEL003675	Up	0.195359	0.0646906	0.0029994
ISC/EB-1	LOC5565979	LOC109413884	LOC5565979|AAEL005097	Up	0.184241	0.0211144	0.000420727
ISC/EB-1	LOC5573851	LOC109409294	LOC5573851|AAEL010777	Up	0.183523	0.0534934	0.002017
ISC/EB-1	LOC5578900	LOC109426815	LOC5578900|AAEL013904	Up	0.182104	0.096018	0.0489902
ISC/EB-1	LOC5568090	LOC109416572	LOC5568090|AAEL006511	Up	0.18042	0.0173958	5.29821e-05
ISC/EB-1	LOC5577034	LOC109428755	LOC5577034|AAEL012944	Up	0.175307	0.0183676	0.000320331
ISC/EB-1	LOC5564212	LOC109621247	LOC5564212|AAEL004151	Up	0.173505	0.0210202	8.50843e-06
ISC/EB-1	LOC5575848	LOC109404801	LOC5575848|AAEL012113	Up	0.171065	0.0807127	0.0329934
ISC/EB-1	LOC5578313	LOC109420976	LOC5578313|AAEL013625	Up	0.160677	0.0209021	9.02199e-05
ISC/EB-1	LOC5570244	LOC109405852	LOC5570244|AAEL008188	Up	0.158461	0.0190073	0.000289775
ISC/EB-1	LOC5571571	LOC109403563	LOC5571571|AAEL009160	Up	0.157604	0.073094	0.0337932
ISC/EB-1	LOC5573863	LOC109409303	LOC5573863|AAEL010765	Up	0.144906	0.0688336	0.0359928
ISC/EB-1	LOC5569531	LOC109403451	LOC5569531|AAEL007715	Up	0.143514	0.0195916	4.67846e-05
ISC/EB-1	LOC5577719	LOC109428240	LOC5577719|AAEL013353	Up	0.140718	0.0477244	0.0029994
ISC/EB-1	LOC5563786	LOC109428105	LOC5563786|AAEL003942	Up	0.131403	0.0187859	0.000215132
ISC/EB-1	LOC5569183	LOC109429439	LOC5569183|AAEL007439	Up	0.130644	0.0621689	0.0377924
ISC/EB-1	LOC5572365	LOC109431049	LOC5572365|AAEL009747	Up	0.130246	0.0213094	0.00014836
ISC/EB-1	LOC5576215	LOC109422297	LOC5576215|AAEL002832	Up	0.128904	0.0171763	1.99667e-05
ISC/EB-1	LOC5571226	LOC109422051	LOC5571226|AAEL008921	Up	0.128633	0.055791	0.019996
ISC/EB-1	LOC5580030	LOC109412987	LOC5580030|AAEL009653	Up	0.126425	0.0199992	0.000247072
ISC/EB-1	LOC5574167	LOC115261492	LOC5574167|AAEL010977	Up	0.126402	0.0359303	0.00136444
ISC/EB-1	LOC5574866	LOC109424016	LOC5574866|AAEL011471	Up	0.124833	0.0184158	4.12962e-05
ISC/EB-1	LOC5580239	LOC109421919	LOC5580239|AAEL012326	Up	0.120763	0.0513761	0.019996
ISC/EB-1	LOC5577723	LOC115266377	LOC5577723|AAEL013359	Up	0.103957	0.0264711	0.00132858
ISC/EB-1	LOC5577566	LOC109622780	LOC5577566|AAEL013272	Up	0.0972628	0.0196521	0.00107688
ISC/EB-1	LOC5573211	LOC109407505	LOC5573211|AAEL010318	Up	0.0909559	0.0306084	0.00239952
ISC/EB-1	LOC5567848	LOC109418058	LOC5567848|AAEL000987	Up	0.07757	0.0187099	0.00240512
ISC/EB-1	LOC5567070	LOC109410072	LOC5567070|AAEL005817	Up	0.0742654	0.0175373	0.00159607
ISC/EB-1	LOC23687936	LOC109418991	LOC23687936|AAEL017516	Up	0.0734208	0.0220375	0.00226127
ISC/EB-1	LOC5570139	LOC134284018	LOC5570139|AAEL008103	Up	0.0727318	0.0190017	0.00298267
ISC/EB-1	LOC5563590	LOC109400853	LOC5563590|AAEL000032	Up	0.0696931	0.0242509	0.00459908
ISC/EB-1	LOC5566843	LOC109622065	LOC5566843|AAEL000823	Up	0.0600087	0.0193898	0.00511506
ISC/EB-1	LOC5570243	LOC109405848	LOC5570243|AAEL008192	Up	0.0471181	0.0228349	0.0367926
ISC/EB-1	LOC23687618	LOC109431357	LOC23687618|AAEL017198	Up	0.0358816	0.0175185	0.039992
ISC/EB-1	LOC5578625	LOC115254221	LOC5578625|AAEL003582	Down	-0.0422504	0.0202243	0.0391922
ISC/EB-1	LOC110677764	LOC109406734	LOC110677764|AAEL024434	Down	-0.0601914	0.0186366	0.00253005
ISC/EB-1	LOC5564921	LOC109429586	LOC5564921|AAEL004500	Down	-0.0985819	0.0289212	0.00190668
ISC/EB-1	LOC5574485	LOC109409318	LOC5574485|AAEL002372	Down	-0.112488	0.0194556	0.000251132
ISC/EB-1	LOC5567559	LOC109413799	LOC5567559|AAEL006158	Down	-0.120747	0.0571194	0.0333933
ISC/EB-1	LOC5573413	LOC109401923	LOC5573413|AAEL002047	Down	-0.127653	0.0191566	0.000333497
ISC/EB-1	LOC5569745	LOC109410645	LOC5569745|AAEL007883	Down	-0.134468	0.0613718	0.040192
ISC/EB-1	LOC5570335	LOC115270301	LOC5570335|AAEL019669	Down	-0.142672	0.0435186	0.00289994
ISC/EB-1	LOC5565701	LOC109411963	LOC5565701|AAEL014944	Down	-0.146081	0.0535501	0.00859828
ISC/EB-1	LOC5576758	LOC109416823	LOC5576758|AAEL025553	Down	-0.150152	0.0199755	3.58267e-05
ISC/EB-1	LOC5575105	LOC109418249	LOC5575105|AAEL011656	Down	-0.153375	0.0199282	4.87997e-05
ISC/EB-1	LOC5578684	LOC109430324	LOC5578684|AAEL003645	Down	-0.161397	0.0629209	0.0157968
ISC/EB-1	LOC5580010	LOC109411856	LOC5580010|AAEL009637	Down	-0.165072	0.0832194	0.0479904
ISC/EB-1	LOC5565441	LOC109426026	LOC5565441|AAEL000641	Down	-0.166393	0.0678002	0.0181964
ISC/EB-1	LOC5573732	LOC109422315	LOC5573732|AAEL000291	Down	-0.181968	0.0655202	0.00679864
ISC/EB-1	LOC5567501	LOC109621796	LOC5567501|AAEL006115	Down	-0.183062	0.0619627	0.00579884
ISC/EB-1	LOC5575718	LOC109431782	LOC5575718|AAEL012035	Down	-0.184294	0.0684641	0.0069986
ISC/EB-1	LOC5572968	LOC109412318	LOC5572968|AAEL010168	Down	-0.204613	0.0220384	3.81727e-05
ISC/EB-1	LOC5571466	LOC109408401	LOC5571466|AAEL009101	Down	-0.209508	0.0554326	0.00150649
ISC/EB-1	LOC5571763	LOC109621276	LOC5571763|AAEL009287	Down	-0.232833	0.0722742	0.00274081
ISC/EB-1	LOC5564487	LOC109425135	LOC5564487|AAEL004288	Down	-0.233043	0.113081	0.039992
ISC/EB-1	LOC5576440	LOC109421033	LOC5576440|AAEL005536	Down	-0.233231	0.0893784	0.0089982
ISC/EB-1	LOC5568471	LOC109423328	LOC5568471|AAEL006885	Down	-0.235473	0.0379385	1.36438e-05
ISC/EB-1	LOC5574404	LOC109419212	LOC5574404|AAEL011116	Down	-0.243821	0.05172	0.000465709
ISC/EB-1	LOC5570913	LOC109401363	LOC5570913|AAEL001484	Down	-0.244754	0.0991393	0.0131974
ISC/EB-1	LOC5579795	LOC109422355	LOC5579795|AAEL003957	Down	-0.254791	0.0439395	0.000219461
ISC/EB-1	LOC23687404	LOC109413713	LOC23687404|AAEL016984	Down	-0.256276	0.0496495	0.000229956
ISC/EB-1	LOC5576835	LOC134291442	LOC5576835|AAEL012819	Down	-0.257483	0.115201	0.0257948
ISC/EB-1	LOC5577268	LOC109403124	LOC5577268|AAEL013128	Down	-0.25827	0.10546	0.019796
ISC/EB-1	LOC110679868	LOC109401653	LOC110679868|AAEL027050	Down	-0.26185	0.0882472	0.004999
ISC/EB-1	LOC5576745	LOC109409745	LOC5576745|AAEL012731	Down	-0.262148	0.117196	0.0255949
ISC/EB-1	LOC5568880	LOC109406369	LOC5568880|AAEL007184	Down	-0.266332	0.116408	0.0289942
ISC/EB-1	LOC5568302	LOC109410522	LOC5568302|AAEL006741	Down	-0.274541	0.0643136	0.00070498
ISC/EB-1	LOC5568658	LOC109398864	LOC5568658|AAEL007001	Down	-0.276653	0.11686	0.0257948
ISC/EB-1	LOC5568633	LOC109428196	LOC5568633|AAEL007023	Down	-0.279437	0.0911046	0.00313411
ISC/EB-1	LOC5567259	LOC109416303	LOC5567259|AAEL005931	Down	-0.283031	0.123049	0.0285943
ISC/EB-1	LOC5577327	LOC115269140	LOC5577327|AAEL000410	Down	-0.28378	0.113341	0.0119976
ISC/EB-1	LOC5574816	LOC109409852	LOC5574816|AAEL002464	Down	-0.286424	0.0871635	0.00262477
ISC/EB-1	LOC23687841	LOC109419547	LOC23687841|AAEL017421	Down	-0.289127	0.137628	0.0369926
ISC/EB-1	LOC5573372	LOC109430713	LOC5573372|AAEL010467	Down	-0.29172	0.0953056	0.00259948
ISC/EB-1	LOC5574214	LOC109408655	LOC5574214|AAEL024525	Down	-0.294183	0.133739	0.0365927
ISC/EB-1	LOC5564337	LOC115263581	LOC5564337|nan	Down	-0.295616	0.130604	0.0281944
ISC/EB-1	LOC5580331	LOC109420081	LOC5580331|AAEL013074	Down	-0.297535	0.0918792	0.00228117
ISC/EB-1	LOC5580192	LOC109419814	LOC5580192|AAEL002551	Down	-0.299436	0.0995542	0.00319936
ISC/EB-1	LOC5570007	LOC134291439	LOC5570007|AAEL000175	Down	-0.301783	0.0752159	0.000642995
ISC/EB-1	LOC5573266	LOC109622239	LOC5573266|AAEL019802	Down	-0.302536	0.1436	0.0343931
ISC/EB-1	LOC5577080	LOC109399413	LOC5577080|AAEL012980	Down	-0.303043	0.113744	0.00919816
ISC/EB-1	LOC5567581	LOC109424033	LOC5567581|AAEL006174	Down	-0.304034	0.140729	0.0355929
ISC/EB-1	LOC5571785	LOC109410081	LOC5571785|AAEL009313	Down	-0.310648	0.0423212	3.23854e-05
ISC/EB-1	LOC5569049	LOC115253744	LOC5569049|AAEL007342	Down	-0.315101	0.0654267	0.000476716
ISC/EB-1	LOC5567491	LOC109622181	LOC5567491|AAEL000951	Down	-0.3163	0.0310202	1.53739e-05
ISC/EB-1	LOC5568408	LOC109427517	LOC5568408|AAEL006829	Down	-0.320112	0.0974987	0.00277844
ISC/EB-1	LOC5570455	LOC109402076	LOC5570455|AAEL008341	Down	-0.325547	0.0978781	0.00264659
ISC/EB-1	LOC5577291	LOC109420845	LOC5577291|AAEL013144	Down	-0.328007	0.060188	0.000448357
ISC/EB-1	LOC5577893	LOC109430890	LOC5577893|AAEL013407	Down	-0.328008	0.0853048	0.00108004
ISC/EB-1	LOC5577910	LOC109429944	LOC5577910|AAEL003352	Down	-0.33203	0.0766764	0.000875331
ISC/EB-1	LOC5571006	LOC109413090	LOC5571006|AAEL008738	Down	-0.33335	0.0778582	0.000585269
ISC/EB-1	LOC5577777	LOC109411427	LOC5577777|AAEL003285	Down	-0.336092	0.0992934	0.00229366
ISC/EB-1	LOC5571976	LOC109401911	LOC5571976|AAEL009467	Down	-0.341423	0.135769	0.0179964
ISC/EB-1	LOC5565159	LOC109432062	LOC5565159|AAEL004613	Down	-0.346331	0.145318	0.0181964
ISC/EB-1	LOC5573879	LOC109422594	LOC5573879|AAEL010801	Down	-0.347866	0.0594625	0.000178427
ISC/EB-1	LOC5567494	LOC109622277	LOC5567494|AAEL000941	Down	-0.350156	0.102187	0.00266361
ISC/EB-1	LOC5567647	LOC109418319	LOC5567647|AAEL027611	Down	-0.350799	0.125091	0.00639872
ISC/EB-1	LOC5570237	LOC109426316	LOC5570237|AAEL008171	Down	-0.354075	0.164734	0.0443911
ISC/EB-1	LOC5573964	LOC109410442	LOC5573964|AAEL010819	Down	-0.357531	0.0711156	0.000182918
ISC/EB-1	LOC5575813	LOC115255981	LOC5575813|AAEL012069	Down	-0.36063	0.0925023	0.00124386
ISC/EB-1	LOC5574648	LOC115256333	LOC5574648|AAEL011288	Down	-0.36982	0.0346495	2.57768e-05
ISC/EB-1	LOC5564792	LOC109411982	LOC5564792|AAEL004445	Down	-0.370308	0.124927	0.00519896
ISC/EB-1	LOC5578368	LOC109407908	LOC5578368|AAEL003530	Down	-0.370591	0.0188445	8.38114e-07
ISC/EB-1	LOC5580325	LOC109420084	LOC5580325|AAEL013068	Down	-0.371679	0.0757924	0.000173515
ISC/EB-1	LOC5563620	LOC109415018	LOC5563620|AAEL025818	Down	-0.374846	0.181925	0.0405919
ISC/EB-1	LOC5564012	LOC109402079	LOC5564012|AAEL014275	Down	-0.376757	0.17885	0.044991
ISC/EB-1	LOC5568150	LOC109415473	LOC5568150|AAEL006577	Down	-0.380991	0.16431	0.0253949
ISC/EB-1	LOC5571930	LOC109410618	LOC5571930|AAEL009389	Down	-0.381963	0.0726604	0.000292093
ISC/EB-1	LOC5573974	LOC109401487	LOC5573974|AAEL010821	Down	-0.384307	0.0209961	1.01466e-05
ISC/EB-1	LOC5573238	LOC109423293	LOC5573238|AAEL010330	Down	-0.384608	0.125719	0.00339932
ISC/EB-1	LOC5565930	LOC109414612	LOC5565930|AAEL005054	Down	-0.38487	0.164135	0.0265947
ISC/EB-1	LOC5577429	LOC109427694	LOC5577429|AAEL013176	Down	-0.385409	0.181333	0.044791
ISC/EB-1	LOC5571907	LOC109397131	LOC5571907|AAEL009414	Down	-0.39086	0.104494	0.00131581
ISC/EB-1	LOC5575721	LOC109431859	LOC5575721|AAEL012029	Down	-0.396295	0.186357	0.044991
ISC/EB-1	LOC5571084	LOC109408437	LOC5571084|AAEL008789	Down	-0.397263	0.0885285	0.000350446
ISC/EB-1	LOC5569181	LOC109429440	LOC5569181|AAEL007441	Down	-0.398362	0.0850273	0.00048234
ISC/EB-1	LOC5568784	LOC109415663	LOC5568784|AAEL007135	Down	-0.401728	0.0687959	8.86182e-05
ISC/EB-1	LOC5573489	LOC109401913	LOC5573489|AAEL014505	Down	-0.402581	0.126098	0.00359928
ISC/EB-1	LOC5570989	LOC109404483	LOC5570989|AAEL008719	Down	-0.402733	0.137227	0.0059988
ISC/EB-1	LOC5577407	LOC109621577	LOC5577407|AAEL003161	Down	-0.404266	0.0860454	0.00249383
ISC/EB-1	LOC5563664	LOC109412580	LOC5563664|AAEL000084	Down	-0.407315	0.170684	0.0193961
ISC/EB-1	LOC5570501	LOC109418106	LOC5570501|AAEL001394	Down	-0.408738	0.145444	0.00659868
ISC/EB-1	LOC5572771	LOC115265584	LOC5572771|AAEL010043	Down	-0.411076	0.187128	0.0363927
ISC/EB-1	LOC23687579	LOC109420687	LOC23687579|AAEL019825	Down	-0.41141	0.198829	0.0425915
ISC/EB-1	LOC5576587	LOC109405086	LOC5576587|AAEL002933	Down	-0.415516	0.200176	0.0471906
ISC/EB-1	LOC5571453	LOC109411467	LOC5571453|AAEL009074	Down	-0.418987	0.0920172	0.000539084
ISC/EB-1	LOC5568659	LOC109398795	LOC5568659|AAEL007019	Down	-0.420169	0.0743631	0.001687
ISC/EB-1	LOC5570792	LOC109424164	LOC5570792|AAEL008562	Down	-0.423265	0.201236	0.0463907
ISC/EB-1	LOC5577687	LOC109426190	LOC5577687|AAEL013320	Down	-0.423578	0.173214	0.0175965
ISC/EB-1	LOC5565156	LOC109432057	LOC5565156|AAEL004616	Down	-0.42543	0.123882	0.00340738
ISC/EB-1	LOC5568690	LOC109426897	LOC5568690|AAEL007065	Down	-0.426972	0.0716679	0.000245524
ISC/EB-1	LOC5569222	LOC109417729	LOC5569222|AAEL007494	Down	-0.428289	0.108052	0.000865615
ISC/EB-1	LOC5576737	LOC109409079	LOC5576737|AAEL002978	Down	-0.430446	0.173422	0.0131974
ISC/EB-1	LOC5564296	LOC109425687	LOC5564296|AAEL014393	Down	-0.430886	0.133519	0.00251185
ISC/EB-1	LOC5576082	LOC109406020	LOC5576082|AAEL012312	Down	-0.433408	0.147096	0.00459908
ISC/EB-1	LOC5570509	LOC109418082	LOC5570509|AAEL001432	Down	-0.443817	0.0868112	0.000198762
ISC/EB-1	LOC5572308	LOC109402833	LOC5572308|AAEL009700	Down	-0.448449	0.141148	0.00308491
ISC/EB-1	LOC5568141	LOC109425692	LOC5568141|AAEL006582	Down	-0.450188	0.144131	0.00359928
ISC/EB-1	LOC110681498	LOC109399951	LOC110681498|AAEL023347	Down	-0.452837	0.132357	0.0025269
ISC/EB-1	LOC5575914	LOC109423800	LOC5575914|AAEL012175	Down	-0.455049	0.0506687	3.70745e-05
ISC/EB-1	LOC5574348	LOC109398016	LOC5574348|AAEL002350	Down	-0.457838	0.18315	0.0181964
ISC/EB-1	LOC5570205	LOC109405631	LOC5570205|AAEL008167	Down	-0.460655	0.161831	0.00679864
ISC/EB-1	LOC5570017	LOC134291428	LOC5570017|AAEL000208	Down	-0.462214	0.124318	0.00157007
ISC/EB-1	LOC5578082	LOC115267841	LOC5578082|AAEL003423	Down	-0.465732	0.105298	0.00111201
ISC/EB-1	LOC5573383	LOC109430732	LOC5573383|AAEL010474	Down	-0.466367	0.209238	0.0365927
ISC/EB-1	LOC5567793	LOC109400116	LOC5567793|AAEL000138	Down	-0.466799	0.131467	0.00168524
ISC/EB-1	LOC5572696	LOC109417810	LOC5572696|AAEL009964	Down	-0.469392	0.0569768	5.12232e-05
ISC/EB-1	LOC5568520	LOC109426523	LOC5568520|AAEL027905	Down	-0.470565	0.177461	0.0159968
ISC/EB-1	LOC5563554	LOC115254260	LOC5563554|AAEL000081	Down	-0.47175	0.201858	0.024795
ISC/EB-1	LOC5568284	LOC109397285	LOC5568284|AAEL006711	Down	-0.472564	0.216364	0.0409918
ISC/EB-1	LOC5576477	LOC134285148	LOC5576477|AAEL002887	Down	-0.474652	0.136859	0.00230254
ISC/EB-1	LOC5572049	LOC109398173	LOC5572049|AAEL000245	Down	-0.480309	0.145988	0.00259471
ISC/EB-1	LOC5564860	LOC109409570	LOC5564860|AAEL004472	Down	-0.48397	0.111399	0.000468243
ISC/EB-1	LOC5568202	LOC109420402	LOC5568202|AAEL006634	Down	-0.485515	0.165846	0.00559888
ISC/EB-1	LOC5576658	LOC109418288	LOC5576658|AAEL012681	Down	-0.486257	0.0446905	1.6927e-05
ISC/EB-1	LOC5578184	LOC109431314	LOC5578184|AAEL003469	Down	-0.487927	0.160726	0.00319936
ISC/EB-1	LOC5574626	LOC109408300	LOC5574626|AAEL011264	Down	-0.488312	0.194516	0.0195961
ISC/EB-1	LOC110674049	LOC109397298	LOC110674049|AAEL027326	Down	-0.489603	0.14091	0.00171146
ISC/EB-1	LOC5574862	LOC109422854	LOC5574862|AAEL011468	Down	-0.491839	0.0709516	3.92972e-05
ISC/EB-1	LOC5572673	LOC115255015	LOC5572673|AAEL009948	Down	-0.4926	0.208421	0.0231954
ISC/EB-1	LOC5566763	LOC109425656	LOC5566763|AAEL012410	Down	-0.494796	0.178509	0.0119976
ISC/EB-1	LOC5570951	LOC109411446	LOC5570951|AAEL008674	Down	-0.498127	0.173796	0.0069986
ISC/EB-1	LOC5576054	LOC109412653	LOC5576054|AAEL013952	Down	-0.500398	0.13714	0.00150305
ISC/EB-1	LOC5568103	LOC109418985	LOC5568103|AAEL006538	Down	-0.502321	0.136269	0.0019004
ISC/EB-1	LOC5565942	LOC109414602	LOC5565942|AAEL019563	Down	-0.502491	0.190457	0.0139972
ISC/EB-1	LOC5572383	LOC109422119	LOC5572383|AAEL009772	Down	-0.50321	0.10282	0.000371696
ISC/EB-1	LOC5572257	LOC115258128	LOC5572257|AAEL009680	Down	-0.509037	0.142393	0.00144864
ISC/EB-1	LOC23687901	LOC109400736	LOC23687901|AAEL017481	Down	-0.51078	0.0519039	5.64784e-05
ISC/EB-1	LOC5573790	LOC109428891	LOC5573790|AAEL010716	Down	-0.511235	0.139472	0.00126609
ISC/EB-1	LOC5571437	LOC109406399	LOC5571437|AAEL009070	Down	-0.513615	0.162451	0.00239952
ISC/EB-1	LOC5563706	LOC109417128	LOC5563706|AAEL003921	Down	-0.515321	0.165865	0.0059988
ISC/EB-1	LOC5577545	LOC109430176	LOC5577545|AAEL013249	Down	-0.517536	0.206074	0.0143971
ISC/EB-1	LOC5575041	LOC109423304	LOC5575041|AAEL011588	Down	-0.519645	0.160577	0.00239952
ISC/EB-1	LOC5574704	LOC109417799	LOC5574704|AAEL011340	Down	-0.522777	0.183897	0.00759848
ISC/EB-1	LOC5566793	LOC109398022	LOC5566793|AAEL026243	Down	-0.525316	0.138091	0.00141734
ISC/EB-1	LOC5563880	LOC109403482	LOC5563880|AAEL014198	Down	-0.526193	0.12688	0.00109254
ISC/EB-1	LOC5580073	LOC109415200	LOC5580073|AAEL002158	Down	-0.52662	0.0944742	0.000337798
ISC/EB-1	LOC5579902	LOC109410392	LOC5579902|AAEL001044	Down	-0.527756	0.126633	0.00143452
ISC/EB-1	LOC5564146	LOC109404944	LOC5564146|AAEL014325	Down	-0.528163	0.201707	0.0129974
ISC/EB-1	LOC5572208	LOC109431665	LOC5572208|AAEL009606	Down	-0.529042	0.187119	0.00939812
ISC/EB-1	LOC5570914	LOC109432862	LOC5570914|AAEL001479	Down	-0.530426	0.158388	0.00259948
ISC/EB-1	LOC5579199	LOC109415590	LOC5579199|AAEL014039	Down	-0.531234	0.0554242	0.000104457
ISC/EB-1	LOC5567383	LOC109427110	LOC5567383|AAEL006061	Down	-0.531384	0.134558	0.00136787
ISC/EB-1	LOC5570147	LOC109423425	LOC5570147|AAEL008128	Down	-0.533186	0.126028	0.00100043
ISC/EB-1	LOC5567528	LOC109413668	LOC5567528|AAEL006129	Down	-0.533402	0.116202	0.000624951
ISC/EB-1	LOC5566936	LOC109433363	LOC5566936|AAEL005699	Down	-0.533967	0.149214	0.00202149
ISC/EB-1	LOC5566723	LOC109622566	LOC5566723|AAEL015236	Down	-0.534925	0.19682	0.00859828
ISC/EB-1	LOC5571789	LOC109405114	LOC5571789|AAEL009317	Down	-0.536778	0.113821	0.000694354
ISC/EB-1	LOC5569738	LOC109410641	LOC5569738|AAEL007868	Down	-0.540691	0.070836	5.57866e-05
ISC/EB-1	LOC5569595	LOC109419413	LOC5569595|AAEL001245	Down	-0.541007	0.200316	0.010198
ISC/EB-1	LOC5573407	LOC115256393	LOC5573407|AAEL002077	Down	-0.541571	0.14708	0.00237705
ISC/EB-1	LOC5579897	LOC109398749	LOC5579897|AAEL001048	Down	-0.543445	0.182087	0.00559888
ISC/EB-1	LOC5572967	LOC109422712	LOC5572967|AAEL010159	Down	-0.543705	0.0896956	0.000210489
ISC/EB-1	LOC5580021	LOC109414697	LOC5580021|AAEL009646	Down	-0.54638	0.121566	0.000913049
ISC/EB-1	LOC5568807	LOC109419587	LOC5568807|AAEL001177	Down	-0.54705	0.167889	0.0029994
ISC/EB-1	LOC5566219	LOC109409964	LOC5566219|AAEL005255	Down	-0.550858	0.146879	0.00236027
ISC/EB-1	LOC5579263	LOC109412524	LOC5579263|AAEL011873	Down	-0.553693	0.117274	0.000599054
ISC/EB-1	LOC5577289	LOC109412544	LOC5577289|AAEL013139	Down	-0.555419	0.0587714	6.94784e-05
ISC/EB-1	LOC5564364	LOC109408764	LOC5564364|AAEL013783	Down	-0.555994	0.139758	0.000459237
ISC/EB-1	LOC5577071	LOC109414823	LOC5577071|AAEL003106	Down	-0.571388	0.178338	0.00259948
ISC/EB-1	LOC5567684	LOC109427053	LOC5567684|AAEL006251	Down	-0.57346	0.115399	0.000473317
ISC/EB-1	LOC5580074	LOC109414087	LOC5580074|AAEL002178	Down	-0.575084	0.137119	0.00134304
ISC/EB-1	LOC5571609	LOC115268366	LOC5571609|AAEL009201	Down	-0.57911	0.0582037	1.67003e-05
ISC/EB-1	LOC5567097	LOC109433624	LOC5567097|AAEL005839	Down	-0.579854	0.10135	4.79247e-05
ISC/EB-1	LOC5566009	LOC109398065	LOC5566009|AAEL005106	Down	-0.583469	0.201539	0.00619876
ISC/EB-1	LOC5568279	LOC115257160	LOC5568279|AAEL006713	Down	-0.583891	0.199136	0.00679864
ISC/EB-1	LOC5575808	LOC109406147	LOC5575808|AAEL012071	Down	-0.584362	0.208856	0.0109978
ISC/EB-1	LOC5575645	LOC109402436	LOC5575645|AAEL011979	Down	-0.586257	0.186089	0.0039992
ISC/EB-1	LOC5569310	LOC115258685	LOC5569310|AAEL007549	Down	-0.587832	0.0663178	3.70717e-05
ISC/EB-1	LOC5572650	LOC109420234	LOC5572650|AAEL001865	Down	-0.588366	0.11759	0.000333457
ISC/EB-1	LOC5564798	LOC115269424	LOC5564798|AAEL004423	Down	-0.589697	0.058754	2.85379e-05
ISC/EB-1	LOC5580260	LOC109414335	LOC5580260|AAEL012586	Down	-0.58973	0.197876	0.00459908
ISC/EB-1	LOC5570108	LOC109401825	LOC5570108|AAEL020238	Down	-0.596569	0.0243079	2.84044e-06
ISC/EB-1	LOC5566684	LOC115262185	LOC5566684|AAEL005567	Down	-0.59678	0.0697813	0.00020739
ISC/EB-1	LOC5580278	LOC109419166	LOC5580278|AAEL003011	Down	-0.600051	0.113145	0.000537855
ISC/EB-1	LOC5564225	LOC109403769	LOC5564225|AAEL023037	Down	-0.603064	0.142598	0.00111493
ISC/EB-1	LOC5574834	LOC109415142	LOC5574834|AAEL011433	Down	-0.604288	0.190486	0.00519896
ISC/EB-1	LOC5570218	LOC109426333	LOC5570218|AAEL008153	Down	-0.604755	0.159682	0.00275374
ISC/EB-1	LOC5577626	LOC109420697	LOC5577626|AAEL003210	Down	-0.604766	0.15792	0.00152556
ISC/EB-1	LOC5573821	LOC109404803	LOC5573821|AAEL010743	Down	-0.605816	0.156577	0.00183244
ISC/EB-1	LOC5565931	LOC109414609	LOC5565931|AAEL025321	Down	-0.60587	0.0874136	4.13476e-05
ISC/EB-1	LOC5569340	LOC109407254	LOC5569340|AAEL007548	Down	-0.608098	0.178677	0.00255974
ISC/EB-1	LOC5568113	LOC109419716	LOC5568113|AAEL006557	Down	-0.609438	0.200025	0.004999
ISC/EB-1	LOC5575585	LOC109410817	LOC5575585|AAEL019950	Down	-0.611385	0.180708	0.00279944
ISC/EB-1	LOC5566079	LOC109424859	LOC5566079|AAEL015064	Down	-0.615629	0.0617384	5.71213e-05
ISC/EB-1	LOC5564544	LOC115266987	LOC5564544|AAEL004319	Down	-0.615918	0.138031	0.000746216
ISC/EB-1	LOC5573976	LOC109410418	LOC5573976|AAEL010814	Down	-0.617328	0.172977	0.00240685
ISC/EB-1	LOC5578495	LOC115256846	LOC5578495|AAEL002335	Down	-0.623232	0.161368	0.00105389
ISC/EB-1	LOC5578307	LOC109401885	LOC5578307|AAEL013628	Down	-0.625615	0.107596	0.000114939
ISC/EB-1	LOC5576214	LOC134291854	LOC5576214|AAEL002827	Down	-0.627697	0.0640814	3.25946e-05
ISC/EB-1	LOC5576221	LOC134291863	LOC5576221|AAEL002833	Down	-0.628893	0.0726216	0.000185393
ISC/EB-1	LOC5571886	LOC109431646	LOC5571886|AAEL019788	Down	-0.633758	0.180375	0.00309704
ISC/EB-1	LOC5564895	LOC109430831	LOC5564895|AAEL014642	Down	-0.641708	0.14451	0.00123883
ISC/EB-1	LOC5564563	LOC109398004	LOC5564563|AAEL014510	Down	-0.642713	0.151954	0.00122593
ISC/EB-1	LOC5575512	LOC109430137	LOC5575512|AAEL011881	Down	-0.642973	0.204652	0.00307345
ISC/EB-1	LOC5578974	LOC109417794	LOC5578974|AAEL019746	Down	-0.643456	0.165019	0.00224759
ISC/EB-1	LOC5570958	LOC109406841	LOC5570958|AAEL008687	Down	-0.645055	0.202183	0.0039992
ISC/EB-1	LOC5578857	LOC109424268	LOC5578857|AAEL027402	Down	-0.645164	0.0662063	3.97818e-05
ISC/EB-1	LOC5571418	LOC109411274	LOC5571418|AAEL009059	Down	-0.645991	0.113744	0.000593457
ISC/EB-1	LOC5566608	LOC115258006	LOC5566608|AAEL000791	Down	-0.647615	0.141612	0.000964072
ISC/EB-1	LOC5576103	LOC115269975	LOC5576103|AAEL002797	Down	-0.648621	0.169725	0.00198262
ISC/EB-1	LOC5577406	LOC109400097	LOC5577406|AAEL003179	Down	-0.649808	0.115102	0.000378196
ISC/EB-1	LOC5570695	LOC109433573	LOC5570695|AAEL008492	Down	-0.650874	0.163603	0.00107032
ISC/EB-1	LOC5571173	LOC109406496	LOC5571173|AAEL008871	Down	-0.651039	0.0997444	0.000219336
ISC/EB-1	LOC5576767	LOC109416470	LOC5576767|AAEL012751	Down	-0.655705	0.205885	0.00359928
ISC/EB-1	LOC5568881	LOC109406379	LOC5568881|AAEL007173	Down	-0.655908	0.178723	0.00136347
ISC/EB-1	LOC5566028	LOC109426302	LOC5566028|AAEL005127	Down	-0.663628	0.205155	0.00359928
ISC/EB-1	LOC23687624	LOC109622164	LOC23687624|AAEL017204	Down	-0.664695	0.186924	0.00181462
ISC/EB-1	LOC5573990	LOC109425667	LOC5573990|AAEL010840	Down	-0.670086	0.116278	0.000331932
ISC/EB-1	LOC5575162	LOC109420670	LOC5575162|AAEL000328	Down	-0.670565	0.153278	0.00118093
ISC/EB-1	LOC5579391	LOC109414321	LOC5579391|AAEL015493	Down	-0.677095	0.143069	0.000746846
ISC/EB-1	LOC5565261	LOC109431109	LOC5565261|AAEL020830	Down	-0.682884	0.191791	0.00259948
ISC/EB-1	LOC5564231	LOC109403775	LOC5564231|AAEL004176	Down	-0.686747	0.128932	0.000764107
ISC/EB-1	LOC5567898	LOC109426003	LOC5567898|AAEL006342	Down	-0.686828	0.191777	0.00258625
ISC/EB-1	LOC5577026	LOC109428775	LOC5577026|AAEL012950	Down	-0.689387	0.152491	0.00123598
ISC/EB-1	LOC5571444	LOC109409715	LOC5571444|AAEL009080	Down	-0.691415	0.176184	0.00224287
ISC/EB-1	LOC5578458	LOC109403725	LOC5578458|AAEL000523	Down	-0.692359	0.147515	0.000430988
ISC/EB-1	LOC5573606	LOC109398784	LOC5573606|AAEL002125	Down	-0.693169	0.199809	0.00319936
ISC/EB-1	LOC5576079	LOC109406008	LOC5576079|AAEL012317	Down	-0.694448	0.104836	0.000268584
ISC/EB-1	LOC5564133	LOC109407632	LOC5564133|AAEL004088	Down	-0.695665	0.0693378	0.000657873
ISC/EB-1	LOC5575135	LOC109400752	LOC5575135|AAEL000330	Down	-0.698338	0.170215	0.00150924
ISC/EB-1	LOC5572925	LOC109401397	LOC5572925|AAEL010143	Down	-0.699929	0.197	0.0023959
ISC/EB-1	LOC5566450	LOC109400980	LOC5566450|AAEL005391	Down	-0.700578	0.17505	0.00124652
ISC/EB-1	LOC5564627	LOC109410014	LOC5564627|AAEL025567	Down	-0.702149	0.153948	0.000823138
ISC/EB-1	LOC5578257	LOC109409609	LOC5578257|AAEL013596	Down	-0.703306	0.163742	0.00118353
ISC/EB-1	LOC5566166	LOC115254176	LOC5566166|AAEL005221	Down	-0.705054	0.150824	0.00131688
ISC/EB-1	LOC5570670	LOC109622522	LOC5570670|AAEL008490	Down	-0.705372	0.110735	0.000166746
ISC/EB-1	LOC5567419	LOC109430284	LOC5567419|AAEL006066	Down	-0.715941	0.148056	0.000796308
ISC/EB-1	LOC5564392	LOC109413004	LOC5564392|AAEL004234	Down	-0.728374	0.0763637	2.59252e-05
ISC/EB-1	LOC5565400	LOC134287870	LOC5565400|AAEL004783	Down	-0.734834	0.061003	4.10849e-06
ISC/EB-1	LOC5574995	LOC109400388	LOC5574995|AAEL002523	Down	-0.736371	0.207442	0.00259948
ISC/EB-1	LOC5566081	LOC109423177	LOC5566081|AAEL005162	Down	-0.736504	0.206417	0.00247507
ISC/EB-1	LOC5567100	LOC109415625	LOC5567100|AAEL005830	Down	-0.739123	0.184536	0.00170693
ISC/EB-1	LOC5568944	LOC109421521	LOC5568944|AAEL007243	Down	-0.752555	0.167915	0.00133913
ISC/EB-1	LOC5570114	LOC109414700	LOC5570114|AAEL008079	Down	-0.753626	0.108478	0.000192397
ISC/EB-1	LOC5570063	LOC109429508	LOC5570063|AAEL001354	Down	-0.771082	0.168878	0.000955929
ISC/EB-1	LOC5563592	LOC109400867	LOC5563592|AAEL000010	Down	-0.771367	0.0188222	1.94706e-07
ISC/EB-1	LOC5570788	LOC109424158	LOC5570788|AAEL008556	Down	-0.772187	0.196777	0.00217217
ISC/EB-1	LOC5571450	LOC109409719	LOC5571450|AAEL009078	Down	-0.772371	0.100835	0.000138377
ISC/EB-1	LOC5565372	LOC134287869	LOC5565372|AAEL004755	Down	-0.772731	0.219687	0.00279944
ISC/EB-1	LOC5575287	LOC109431598	LOC5575287|AAEL011750	Down	-0.775592	0.192941	0.002115
ISC/EB-1	LOC5564809	LOC109397080	LOC5564809|AAEL014630	Down	-0.7782	0.145653	0.000443358
ISC/EB-1	LOC5574494	LOC115258703	LOC5574494|AAEL002377	Down	-0.778254	0.134915	0.000277413
ISC/EB-1	LOC5568553	LOC109411242	LOC5568553|AAEL001109	Down	-0.781335	0.200641	0.00209854
ISC/EB-1	LOC5574976	LOC109398402	LOC5574976|AAEL002501	Down	-0.782944	0.104987	0.000156795
ISC/EB-1	LOC5567286	LOC109413902	LOC5567286|AAEL005946	Down	-0.784049	0.106771	4.55527e-05
ISC/EB-1	LOC5580036	LOC109423962	LOC5580036|AAEL010230	Down	-0.789952	0.0950997	7.66549e-05
ISC/EB-1	LOC5573744	LOC109422303	LOC5573744|AAEL019937	Down	-0.794281	0.0714457	2.24159e-05
ISC/EB-1	LOC5577113	LOC115257348	LOC5577113|AAEL008697	Down	-0.794687	0.0539231	1.48952e-05
ISC/EB-1	LOC5567167	LOC109429172	LOC5567167|AAEL005897	Down	-0.802028	0.179365	0.000539298
ISC/EB-1	LOC5574943	LOC109412057	LOC5574943|AAEL010453	Down	-0.803748	0.179785	0.000922236
ISC/EB-1	LOC5578382	LOC109405528	LOC5578382|AAEL013661	Down	-0.805822	0.0446409	7.13798e-06
ISC/EB-1	LOC5572478	LOC109406732	LOC5572478|AAEL009808	Down	-0.805967	0.139423	0.000106309
ISC/EB-1	LOC5567396	LOC109427107	LOC5567396|AAEL006053	Down	-0.812259	0.0853642	5.98486e-05
ISC/EB-1	LOC5575681	LOC109419050	LOC5575681|AAEL011992	Down	-0.812466	0.0929217	7.14517e-05
ISC/EB-1	LOC5566092	LOC109406928	LOC5566092|AAEL005170	Down	-0.812733	0.0556939	5.98889e-05
ISC/EB-1	LOC5578162	LOC109398650	LOC5578162|nan	Down	-0.813434	0.213156	0.00205229
ISC/EB-1	LOC110677182	LOC109408543	LOC110677182|-	Down	-0.818123	0.0308139	5.5733e-07
ISC/EB-1	LOC5575223	LOC115253577	LOC5575223|AAEL010608	Down	-0.822793	0.139131	0.000287573
ISC/EB-1	LOC5575242	LOC109407972	LOC5575242|AAEL011711	Down	-0.827714	0.0439849	0.000132973
ISC/EB-1	LOC5577483	LOC109413115	LOC5577483|AAEL013236	Down	-0.835656	0.170265	0.000487595
ISC/EB-1	LOC5566901	LOC109408356	LOC5566901|AAEL000854	Down	-0.836243	0.168739	0.0010614
ISC/EB-1	LOC5576353	LOC109416865	LOC5576353|AAEL002881	Down	-0.845708	0.0616224	1.15411e-05
ISC/EB-1	LOC5571414	LOC109406842	LOC5571414|AAEL009041	Down	-0.846711	0.171194	0.000725841
ISC/EB-1	LOC5570960	LOC115258816	LOC5570960|AAEL008692	Down	-0.850363	0.120994	0.000169187
ISC/EB-1	LOC5575971	LOC109414136	LOC5575971|AAEL012218	Down	-0.861549	0.224392	0.00210282
ISC/EB-1	LOC5572372	LOC115266806	LOC5572372|AAEL009760	Down	-0.86196	0.0748731	5.57577e-05
ISC/EB-1	LOC110675667	LOC109416460	LOC110675667|AAEL024853	Down	-0.867263	0.151191	0.000646308
ISC/EB-1	LOC5574746	LOC109405382	LOC5574746|AAEL011381	Down	-0.871622	0.131374	0.000367614
ISC/EB-1	LOC5577326	LOC109427223	LOC5577326|AAEL000436	Down	-0.874558	0.201262	0.0011113
ISC/EB-1	LOC5578538	LOC109417839	LOC5578538|AAEL013744	Down	-0.875543	0.109221	0.000240685
ISC/EB-1	LOC5575751	LOC109410371	LOC5575751|AAEL002722	Down	-0.878248	0.161789	0.000309768
ISC/EB-1	LOC5572521	LOC109427980	LOC5572521|AAEL009836	Down	-0.885769	0.165776	0.000499195
ISC/EB-1	LOC5567162	LOC109398834	LOC5567162|AAEL005914	Down	-0.895956	0.20883	0.000723103
ISC/EB-1	LOC5566059	LOC109400800	LOC5566059|AAEL005143	Down	-0.906212	0.0705196	1.81812e-05
ISC/EB-1	LOC5575714	LOC115253942	LOC5575714|AAEL012023	Down	-0.906639	0.20295	0.00134974
ISC/EB-1	LOC5578833	LOC109399426	LOC5578833|AAEL013876	Down	-0.907462	0.121957	0.000124723
ISC/EB-1	LOC23687553	LOC109423362	LOC23687553|AAEL017133	Down	-0.908543	0.228271	0.000881722
ISC/EB-1	LOC23687627	LOC109425480	LOC23687627|AAEL021288	Down	-0.91065	0.205118	0.0015587
ISC/EB-1	LOC5567996	LOC109402517	LOC5567996|AAEL006441	Down	-0.914043	0.174314	0.000423199
ISC/EB-1	LOC5568828	LOC109419613	LOC5568828|AAEL001164	Down	-0.916851	0.103206	5.13036e-05
ISC/EB-1	LOC5577630	LOC109420692	LOC5577630|AAEL003234	Down	-0.923104	0.0594713	7.93824e-06
ISC/EB-1	LOC5566987	LOC109402479	LOC5566987|AAEL005742	Down	-0.928087	0.162667	0.000385286
ISC/EB-1	LOC5576223	LOC134291865	LOC5576223|AAEL002825	Down	-0.929768	0.0977636	0.00011399
ISC/EB-1	LOC5580166	LOC109425340	LOC5580166|AAEL002542	Down	-0.930292	0.156013	0.000230802
ISC/EB-1	LOC5564545	LOC109427525	LOC5564545|AAEL004308	Down	-0.932141	0.143908	0.000205752
ISC/EB-1	LOC5565270	LOC109432379	LOC5565270|AAEL004691	Down	-0.935544	0.0741522	1.17926e-05
ISC/EB-1	LOC5579044	LOC115264678	LOC5579044|AAEL013982	Down	-0.941622	0.158011	0.000482626
ISC/EB-1	LOC5570111	LOC115255731	LOC5570111|AAEL008097	Down	-0.94609	0.223216	0.00110742
ISC/EB-1	LOC5576333	LOC109411781	LOC5576333|AAEL000388	Down	-0.946911	0.190396	0.00126095
ISC/EB-1	LOC5570208	LOC109405004	LOC5570208|AAEL008169	Down	-0.953859	0.174164	0.00056318
ISC/EB-1	LOC5571397	LOC109404972	LOC5571397|AAEL009029	Down	-0.960631	0.151674	0.000210607
ISC/EB-1	LOC5568602	LOC115262042	LOC5568602|AAEL001103	Down	-0.961254	0.153468	0.000209336
ISC/EB-1	LOC5573615	LOC109401281	LOC5573615|AAEL010611	Down	-0.966823	0.0883628	1.24964e-05
ISC/EB-1	LOC5569540	LOC109433195	LOC5569540|AAEL007717	Down	-0.978518	0.162325	0.000477981
ISC/EB-1	LOC5576170	LOC109408005	LOC5576170|AAEL012359	Down	-0.980024	0.0464316	2.44806e-06
ISC/EB-1	LOC5569898	LOC109399253	LOC5569898|AAEL008002	Down	-0.98285	0.103059	4.44085e-05
ISC/EB-1	LOC5573948	LOC109421304	LOC5573948|AAEL002183	Down	-0.983981	0.0837717	1.34683e-05
ISC/EB-1	LOC5576532	LOC109423544	LOC5576532|AAEL012579	Down	-0.993043	0.183255	0.000103239
ISC/EB-1	LOC5579094	LOC109409889	LOC5579094|AAEL003832	Down	-0.993599	0.224478	0.00127976
ISC/EB-1	LOC5564962	LOC115253842	LOC5564962|AAEL014889	Down	-0.996893	0.117714	0.000108242
ISC/EB-1	LOC5575837	LOC109402166	LOC5575837|AAEL012094	Down	-0.998355	0.136269	0.000186247
ISC/EB-1	LOC5569074	LOC109421664	LOC5569074|AAEL001210	Down	-1.00102	0.120073	0.000106544
ISC/EB-1	LOC5577193	LOC109428473	LOC5577193|AAEL013075	Down	-1.00301	0.18361	0.000381038
ISC/EB-1	LOC5578532	LOC109429328	LOC5578532|AAEL013739	Down	-1.00426	0.16056	0.000240773
ISC/EB-1	LOC5568387	LOC109418819	LOC5568387|AAEL006771	Down	-1.00637	0.204066	0.000412881
ISC/EB-1	LOC5574484	LOC109419105	LOC5574484|AAEL002401	Down	-1.00767	0.146041	0.000239936
ISC/EB-1	LOC5574723	LOC109405109	LOC5574723|AAEL011357	Down	-1.00835	0.169758	0.000232091
ISC/EB-1	LOC5565279	LOC109405868	LOC5565279|AAEL014799	Down	-1.01868	0.211132	0.00105395
ISC/EB-1	LOC5577555	LOC115269198	LOC5577555|AAEL013267	Down	-1.02552	0.160876	0.000432452
ISC/EB-1	LOC5567476	LOC109406089	LOC5567476|AAEL000948	Down	-1.02629	0.152446	2.80321e-05
ISC/EB-1	LOC5565619	LOC109400996	LOC5565619|AAEL014899	Down	-1.03212	0.205823	0.00121479
ISC/EB-1	LOC5572867	LOC109430680	LOC5572867|AAEL010087	Down	-1.03365	0.162829	0.000218821
ISC/EB-1	LOC5566654	LOC109416331	LOC5566654|AAEL005508	Down	-1.05639	0.145337	0.000244291
ISC/EB-1	LOC5569895	LOC109399229	LOC5569895|AAEL008006	Down	-1.07618	0.184751	0.000133741
ISC/EB-1	LOC5565955	LOC115264212	LOC5565955|AAEL005052	Down	-1.07724	0.147927	0.000108577
ISC/EB-1	LOC5566935	LOC109433368	LOC5566935|AAEL005709	Down	-1.07804	0.199315	0.000805701
ISC/EB-1	LOC5564821	LOC109406346	LOC5564821|AAEL000626	Down	-1.0801	0.0989183	2.42395e-05
ISC/EB-1	LOC5564091	LOC109408928	LOC5564091|AAEL028021	Down	-1.08353	0.0923273	4.91036e-05
ISC/EB-1	LOC5572640	LOC109433084	LOC5572640|AAEL001838	Down	-1.09376	0.178991	0.000365304
ISC/EB-1	LOC5568717	LOC109426927	LOC5568717|AAEL007043	Down	-1.09904	0.160496	0.000241249
ISC/EB-1	LOC5566344	LOC109419671	LOC5566344|AAEL020936	Down	-1.09976	0.207349	0.000584617
ISC/EB-1	LOC5566613	LOC109401438	LOC5566613|AAEL000757	Down	-1.10181	0.208454	0.000335826
ISC/EB-1	LOC5571596	LOC109417874	LOC5571596|AAEL009185	Down	-1.1082	0.0724927	3.90592e-05
ISC/EB-1	LOC5567465	LOC109403370	LOC5567465|AAEL000942	Down	-1.11291	0.176093	0.000209101
ISC/EB-1	LOC5575492	LOC109420827	LOC5575492|AAEL011871	Down	-1.12213	0.0733748	3.26334e-06
ISC/EB-1	LOC23687710	LOC109622895	LOC23687710|AAEL017290	Down	-1.12313	0.0887191	5.13445e-06
ISC/EB-1	LOC5564118	LOC115256953	LOC5564118|AAEL004118	Down	-1.12726	0.137537	3.86794e-05
ISC/EB-1	LOC5566457	LOC109398470	LOC5566457|AAEL005428	Down	-1.13441	0.0919161	3.0492e-06
ISC/EB-1	LOC5579328	LOC109423323	LOC5579328|AAEL023188	Down	-1.15512	0.177489	0.000548417
ISC/EB-1	LOC5570916	LOC109401408	LOC5570916|AAEL001501	Down	-1.15924	0.14785	7.89824e-05
ISC/EB-1	LOC5571045	LOC109423871	LOC5571045|AAEL008770	Down	-1.16903	0.149338	9.43626e-05
ISC/EB-1	LOC5564065	LOC109431398	LOC5564065|AAEL004081	Down	-1.16921	0.156986	7.24147e-05
ISC/EB-1	LOC5571429	LOC134287924	LOC5571429|AAEL009066	Down	-1.2105	0.109505	3.83464e-05
ISC/EB-1	LOC5572748	LOC109407927	LOC5572748|AAEL010032	Down	-1.22013	0.118332	0.000103583
ISC/EB-1	LOC23687671	LOC109424480	LOC23687671|AAEL017251	Down	-1.22425	0.185524	0.000479216
ISC/EB-1	LOC5567565	LOC109413801	LOC5567565|AAEL006169	Down	-1.24012	0.097509	1.24485e-05
ISC/EB-1	LOC5579168	LOC134284133	LOC5579168|AAEL003871	Down	-1.24479	0.180796	0.000277919
ISC/EB-1	LOC23687632	LOC109420460	LOC23687632|AAEL017212	Down	-1.24512	0.0815373	7.10256e-06
ISC/EB-1	LOC5569798	LOC109414924	LOC5569798|AAEL001314	Down	-1.24608	0.171444	0.000270427
ISC/EB-1	LOC5565774	LOC109415040	LOC5565774|AAEL004988	Down	-1.25817	0.181915	0.000338926
ISC/EB-1	LOC5578147	LOC109412192	LOC5578147|AAEL013528	Down	-1.2818	0.146224	0.000436036
ISC/EB-1	LOC5564518	LOC109405001	LOC5564518|AAEL019716	Down	-1.28487	0.121703	4.69042e-05
ISC/EB-1	LOC5570550	LOC109419258	LOC5570550|AAEL008363	Down	-1.29296	0.198207	0.000384702
ISC/EB-1	LOC110679616	LOC109413556	LOC110679616|AAEL027646	Down	-1.29541	0.126202	1.04514e-05
ISC/EB-1	LOC5578121	LOC109401278	LOC5578121|AAEL003431	Down	-1.29638	0.194512	0.000380304
ISC/EB-1	LOC5572949	LOC109431862	LOC5572949|AAEL010171	Down	-1.29677	0.217518	0.000385582
ISC/EB-1	LOC5577355	LOC109427257	LOC5577355|AAEL000458	Down	-1.31167	0.13134	8.06634e-05
ISC/EB-1	LOC5566773	LOC109397889	LOC5566773|AAEL005628	Down	-1.3235	0.205667	0.000521522
ISC/EB-1	LOC5568558	LOC115262194	LOC5568558|AAEL001134	Down	-1.37116	0.21289	0.000558951
ISC/EB-1	LOC5568428	LOC109414165	LOC5568428|AAEL006836	Down	-1.38932	0.190461	0.000228761
ISC/EB-1	LOC5567118	LOC109399440	LOC5567118|AAEL015304	Down	-1.39074	0.15627	0.000170976
ISC/EB-1	LOC5579021	LOC109414398	LOC5579021|AAEL013960	Down	-1.40106	0.131272	7.0652e-05
ISC/EB-1	LOC5571011	LOC109418514	LOC5571011|AAEL008736	Down	-1.4525	0.189256	0.000249825
ISC/EB-1	LOC5566650	LOC109621576	LOC5566650|AAEL015644	Down	-1.45506	0.186573	9.06811e-05
ISC/EB-1	LOC5567964	LOC109407316	LOC5567964|AAEL006425	Down	-1.45667	0.0780795	1.28433e-05
ISC/EB-1	LOC5567329	LOC109402823	LOC5567329|AAEL005997	Down	-1.46165	0.160052	0.000182801
ISC/EB-1	LOC110678469	LOC109415665	LOC110678469|AAEL027771	Down	-1.47881	0.17328	8.20877e-05
ISC/EB-1	LOC5571664	LOC109408124	LOC5571664|AAEL024228	Down	-1.50784	0.108641	9.24491e-06
ISC/EB-1	LOC5573667	LOC109401545	LOC5573667|AAEL010673	Down	-1.55053	0.150121	2.60895e-05
ISC/EB-1	LOC5565453	LOC109426035	LOC5565453|AAEL000667	Down	-1.59095	0.222327	0.000294258
ISC/EB-1	LOC5573437	LOC115264141	LOC5573437|AAEL010479	Down	-1.5993	0.202806	0.000103913
ISC/EB-1	LOC5566225	LOC109420225	LOC5566225|AAEL005259	Down	-1.60222	0.173672	7.72201e-05
ISC/EB-1	LOC5569832	LOC109426996	LOC5569832|AAEL007942	Down	-1.62139	0.285461	0.00086079
ISC/EB-1	LOC5569859	LOC115255347	LOC5569859|AAEL007947	Down	-1.70045	0.190877	5.69001e-05
ISC/EB-1	LOC5572209	LOC109431683	LOC5572209|AAEL009601	Down	-1.75521	0.180612	5.28774e-05
ISC/EB-1	LOC5570554	LOC109419260	LOC5570554|AAEL008367	Down	-1.75594	0.207815	9.3166e-05
ISC/EB-1	LOC5579467	LOC109402633	LOC5579467|AAEL023603	Down	-1.76903	0.0921768	8.73119e-07
ISC/EB-1	LOC5571093	LOC109419378	LOC5571093|AAEL008801	Down	-1.79886	0.0631099	1.06427e-05
ISC/EB-1	LOC5565454	LOC109426036	LOC5565454|AAEL000647	Down	-1.91988	0.15969	4.2936e-05
ISC/EB-1	LOC5575865	LOC109415571	LOC5575865|AAEL012135	Down	-1.95548	0.194492	7.28194e-05
ISC/EB-1	LOC5572227	LOC109622208	LOC5572227|AAEL009661	Down	-1.97917	0.194848	0.000102829
ISC/EB-1	LOC5570363	LOC109420406	LOC5570363|AAEL008278	Down	-2.00626	0.159157	8.15761e-05
ISC/EB-1	LOC5565550	LOC109414878	LOC5565550|AAEL004854	Down	-2.00914	0.158915	3.47748e-05
ISC/EB-1	LOC110678838	LOC109622212	LOC110678838|AAEL017258	Down	-2.26844	0.201583	4.56876e-05
ISC/EB-1	LOC5571775	LOC109622423	LOC5571775|AAEL009291	Down	-2.27614	0.163935	7.77002e-06
ISC/EB-1	LOC5568046	LOC109421710	LOC5568046|AAEL006483	Down	-2.3141	0.0799415	3.15595e-06
ISC/EB-1	LOC5569847	LOC109417693	LOC5569847|AAEL007962	Down	-2.4388	0.164702	1.2687e-05
ISC/EB-1	LOC110678949	LOC115261471	LOC110678949|AAEL022104	Down	-2.57624	0.0566347	1.13009e-07
ISC/EB-1	LOC5572651	LOC109420252	LOC5572651|AAEL001864	Down	-2.58862	0.186336	0.000149683
ISC/EB-1	LOC110680755	LOC109431645	LOC110680755|AAEL011758	Down	-3.04885	0.0973019	5.89457e-07
ISC/EB-1	LOC110680939	LOC109416926	LOC110680939|AAEL004175	Down	-3.23251	0.0687075	7.03511e-05
ISC/EB-prol	LOC5573994	LOC109425666	LOC5573994|AAEL010843	Up	3.36098	0.0948904	4.18296e-07
ISC/EB-prol	LOC5577042	LOC109405102	LOC5577042|AAEL012964	Up	3.1751	0.0959835	1.14588e-05
ISC/EB-prol	LOC5565624	LOC109407944	LOC5565624|AAEL014292	Up	3.07251	0.0642121	3.5534e-07
ISC/EB-prol	LOC5567769	LOC109408864	LOC5567769|AAEL000102	Up	2.8349	0.11336	6.1491e-06
ISC/EB-prol	LOC5570678	LOC109622515	LOC5570678|AAEL008473	Up	2.67013	0.130331	1.45128e-05
ISC/EB-prol	LOC5572513	LOC109427990	LOC5572513|AAEL009850	Up	2.49615	0.0820323	4.05059e-08
ISC/EB-prol	LOC5579926	LOC109403786	LOC5579926|AAEL006795	Up	2.20744	0.127865	1.84797e-06
ISC/EB-prol	LOC5576744	LOC109407728	LOC5576744|AAEL024536	Up	2.17493	0.0264313	2.43128e-05
ISC/EB-prol	LOC5568503	LOC109431912	LOC5568503|AAEL006922	Up	2.13696	0.0939147	1.18173e-06
ISC/EB-prol	LOC5579871	LOC109404752	LOC5579871|AAEL005985	Up	2.07501	0.094523	1.7647e-07
ISC/EB-prol	LOC5569529	LOC109411702	LOC5569529|AAEL007699	Up	2.04763	0.0248372	1.2368e-07
ISC/EB-prol	LOC5565474	LOC115263538	LOC5565474|AAEL002495	Up	2.03759	0.0832824	6.37308e-06
ISC/EB-prol	LOC5569514	LOC109411698	LOC5569514|AAEL007702	Up	2.0371	0.0978358	6.36241e-07
ISC/EB-prol	LOC5579102	LOC109399100	LOC5579102|AAEL003824	Up	2.00942	0.123062	3.69008e-05
ISC/EB-prol	LOC5575706	LOC109420807	LOC5575706|AAEL012014	Up	1.99409	0.135159	9.35557e-07
ISC/EB-prol	LOC5577178	LOC109424709	LOC5577178|AAEL013047	Up	1.97778	0.125695	1.26936e-05
ISC/EB-prol	LOC110676279	LOC115261752	LOC110676279|AAEL021140	Up	1.936	0.0515608	1.22691e-07
ISC/EB-prol	LOC5574590	LOC109432159	LOC5574590|AAEL002416	Up	1.90272	0.118293	4.35199e-06
ISC/EB-prol	LOC5565108	LOC109399284	LOC5565108|AAEL004586	Up	1.89037	0.0794091	5.48019e-06
ISC/EB-prol	LOC5579924	LOC109403945	LOC5579924|AAEL006794	Up	1.86512	0.0977885	3.70134e-06
ISC/EB-prol	LOC110675609	LOC115265344	LOC110675609|AAEL021795	Up	1.85534	0.0444487	4.34185e-05
ISC/EB-prol	LOC5569143	LOC109407536	LOC5569143|AAEL007403	Up	1.85105	0.133146	1.43078e-05
ISC/EB-prol	LOC5568476	LOC115261964	LOC5568476|AAEL006886	Up	1.82489	0.160496	2.17885e-05
ISC/EB-prol	LOC5571997	LOC109397716	LOC5571997|AAEL009487	Up	1.76134	0.119172	3.36756e-05
ISC/EB-prol	LOC5571828	LOC109426670	LOC5571828|AAEL001690	Up	1.7406	0.130162	2.44178e-05
ISC/EB-prol	LOC5567342	LOC109421195	LOC5567342|AAEL006006	Up	1.72498	0.0728096	1.08849e-05
ISC/EB-prol	LOC5568292	LOC109426592	LOC5568292|AAEL006721	Up	1.70942	0.0798998	0.000242487
ISC/EB-prol	LOC5565048	LOC109406923	LOC5565048|AAEL004567	Up	1.67063	0.0619145	1.61477e-06
ISC/EB-prol	LOC5565670	LOC109415875	LOC5565670|AAEL014931	Up	1.66887	0.108364	2.23938e-05
ISC/EB-prol	LOC5579183	LOC134291547	LOC5579183|AAEL003901	Up	1.66775	0.111273	6.01873e-05
ISC/EB-prol	LOC5570050	LOC109399541	LOC5570050|AAEL000185	Up	1.63812	0.0696469	4.27589e-07
ISC/EB-prol	LOC5570461	LOC109418026	LOC5570461|AAEL008356	Up	1.63424	0.08243	0.000287372
ISC/EB-prol	LOC5572285	LOC109431682	LOC5572285|AAEL001779	Up	1.63066	0.078974	9.73481e-06
ISC/EB-prol	LOC5570871	LOC109408162	LOC5570871|AAEL019868	Up	1.61828	0.127322	2.92367e-05
ISC/EB-prol	LOC5565307	LOC109419757	LOC5565307|AAEL004716	Up	1.61366	0.0956361	1.37998e-05
ISC/EB-prol	LOC5569750	LOC109404691	LOC5569750|AAEL007915	Up	1.60666	0.0705978	2.99944e-07
ISC/EB-prol	LOC5572983	LOC109424298	LOC5572983|AAEL001919	Up	1.59259	0.0995115	5.09048e-06
ISC/EB-prol	LOC5575800	LOC109401784	LOC5575800|AAEL012078	Up	1.58417	0.100856	1.70769e-05
ISC/EB-prol	LOC5565621	LOC109403644	LOC5565621|AAEL020696	Up	1.58168	0.123327	2.1023e-05
ISC/EB-prol	LOC5564917	LOC109428408	LOC5564917|AAEL026744	Up	1.56101	0.122436	1.32636e-05
ISC/EB-prol	LOC5568586	LOC109425828	LOC5568586|AAEL001101	Up	1.551	0.0871137	0.00029248
ISC/EB-prol	LOC110678734	LOC109425568	LOC110678734|AAEL019403	Up	1.54706	0.0230986	2.19133e-05
ISC/EB-prol	LOC5576246	LOC109422249	LOC5576246|AAEL002853	Up	1.51508	0.131695	7.24735e-05
ISC/EB-prol	LOC5576764	LOC115267731	LOC5576764|AAEL012750	Up	1.5024	0.118406	4.1358e-05
ISC/EB-prol	LOC5577316	LOC109417191	LOC5577316|AAEL013163	Up	1.49446	0.0584534	9.97477e-08
ISC/EB-prol	LOC5576104	LOC109419329	LOC5576104|AAEL002777	Up	1.48987	0.119633	3.18869e-05
ISC/EB-prol	LOC5567037	LOC109400911	LOC5567037|AAEL005790	Up	1.47615	0.104006	5.29732e-06
ISC/EB-prol	LOC5568072	LOC109411693	LOC5568072|AAEL006514	Up	1.46234	0.117148	1.2743e-05
ISC/EB-prol	LOC5570383	LOC109622537	LOC5570383|AAEL008262	Up	1.44583	0.125981	0.000114623
ISC/EB-prol	LOC5580053	LOC109415202	LOC5580053|AAEL002175	Up	1.42798	0.091013	2.88799e-05
ISC/EB-prol	LOC5579964	LOC109417417	LOC5579964|AAEL007595	Up	1.42645	0.103867	1.46927e-06
ISC/EB-prol	LOC5564874	LOC134291440	LOC5564874|AAEL004460	Up	1.40467	0.0956678	4.10953e-06
ISC/EB-prol	LOC5569950	LOC109415649	LOC5569950|AAEL008039	Up	1.40257	0.0558615	3.74866e-06
ISC/EB-prol	LOC5565253	LOC115260692	LOC5565253|AAEL004688	Up	1.39154	0.111054	8.28385e-06
ISC/EB-prol	LOC5577997	LOC109402035	LOC5577997|AAEL003385	Up	1.39126	0.115069	0.000113444
ISC/EB-prol	LOC5566229	LOC109405359	LOC5566229|AAEL005271	Up	1.35753	0.100628	1.9808e-05
ISC/EB-prol	LOC5574190	LOC109622219	LOC5574190|AAEL002308	Up	1.34907	0.076177	4.04738e-05
ISC/EB-prol	LOC5571483	LOC109427678	LOC5571483|AAEL001604	Up	1.34427	0.110101	2.50633e-05
ISC/EB-prol	LOC5580280	LOC109407473	LOC5580280|AAEL003006	Up	1.33834	0.0712494	2.95745e-06
ISC/EB-prol	LOC5574612	LOC109412718	LOC5574612|AAEL011255	Up	1.32745	0.0819592	1.01167e-05
ISC/EB-prol	LOC5566316	LOC109397407	LOC5566316|AAEL005305	Up	1.31968	0.0732744	5.00539e-06
ISC/EB-prol	LOC5575108	LOC109428025	LOC5575108|AAEL011665	Up	1.31689	0.129371	3.30137e-05
ISC/EB-prol	LOC5570020	LOC134289877	LOC5570020|AAEL000182	Up	1.29655	0.115008	4.28321e-05
ISC/EB-prol	LOC5570930	LOC109428250	LOC5570930|AAEL008672	Up	1.28711	0.106683	1.93308e-05
ISC/EB-prol	LOC5566800	LOC109402109	LOC5566800|AAEL005651	Up	1.28523	0.0560759	6.67076e-07
ISC/EB-prol	LOC5570996	LOC109418544	LOC5570996|AAEL008723	Up	1.2803	0.0701287	1.88498e-06
ISC/EB-prol	LOC5575983	LOC109397805	LOC5575983|AAEL012233	Up	1.27692	0.0670437	4.33794e-06
ISC/EB-prol	LOC5571854	LOC109404804	LOC5571854|AAEL009345	Up	1.27661	0.0745485	9.50823e-06
ISC/EB-prol	LOC5569504	LOC115258013	LOC5569504|AAEL018144	Up	1.27278	0.102741	8.9682e-06
ISC/EB-prol	LOC5573750	LOC109422366	LOC5573750|AAEL000275	Up	1.26379	0.123231	0.000103974
ISC/EB-prol	LOC5564769	LOC109424556	LOC5564769|AAEL004438	Up	1.25682	0.0990574	5.937e-05
ISC/EB-prol	LOC5568403	LOC115264856	LOC5568403|AAEL006820	Up	1.24197	0.0517167	6.70574e-06
ISC/EB-prol	LOC5570924	LOC109401373	LOC5570924|AAEL026751	Up	1.22897	0.0785718	8.79946e-06
ISC/EB-prol	LOC5565544	LOC109413463	LOC5565544|AAEL004855	Up	1.21916	0.0202496	8.67037e-08
ISC/EB-prol	LOC5572735	LOC109621585	LOC5572735|AAEL010012	Up	1.20951	0.0728008	1.77562e-05
ISC/EB-prol	LOC5564056	LOC109431389	LOC5564056|AAEL004059	Up	1.20896	0.0458108	1.84069e-06
ISC/EB-prol	LOC5570900	LOC109401369	LOC5570900|AAEL001476	Up	1.20875	0.12513	3.79338e-05
ISC/EB-prol	LOC5578311	LOC115255722	LOC5578311|AAEL008084	Up	1.20866	0.112611	4.2749e-05
ISC/EB-prol	LOC5567214	LOC134289566	LOC5567214|AAEL028205	Up	1.20705	0.0782319	9.70669e-06
ISC/EB-prol	LOC5574912	LOC109426806	LOC5574912|AAEL002748	Up	1.20584	0.0802669	1.65925e-05
ISC/EB-prol	LOC5566087	LOC109427648	LOC5566087|AAEL005165	Up	1.18846	0.0415074	6.68976e-07
ISC/EB-prol	LOC5574667	LOC109426220	LOC5574667|AAEL011302	Up	1.1849	0.046118	6.16643e-08
ISC/EB-prol	LOC5569048	LOC109417534	LOC5569048|AAEL007344	Up	1.18452	0.0969117	0.000484584
ISC/EB-prol	LOC5568502	LOC109431907	LOC5568502|AAEL019567	Up	1.17938	0.12889	4.26864e-05
ISC/EB-prol	LOC5565690	LOC109412354	LOC5565690|AAEL004918	Up	1.17517	0.134014	0.000189742
ISC/EB-prol	LOC5574180	LOC109403180	LOC5574180|AAEL002304	Up	1.1743	0.0863506	2.26518e-05
ISC/EB-prol	LOC5570254	LOC109409734	LOC5570254|AAEL008210	Up	1.16415	0.132477	0.000141208
ISC/EB-prol	LOC5567237	LOC109432245	LOC5567237|AAEL000874	Up	1.1639	0.119823	8.32367e-05
ISC/EB-prol	LOC5571039	LOC115263355	LOC5571039|AAEL008784	Up	1.16039	0.104139	1.38073e-05
ISC/EB-prol	LOC5568331	LOC109428427	LOC5568331|AAEL001094	Up	1.16029	0.0748137	2.92362e-06
ISC/EB-prol	LOC5577697	LOC109621269	LOC5577697|AAEL013334	Up	1.15964	0.120865	5.07052e-05
ISC/EB-prol	LOC5576242	LOC115264697	LOC5576242|AAEL002835	Up	1.15289	0.126315	4.1735e-05
ISC/EB-prol	LOC5579494	LOC109419263	LOC5579494|AAEL015271	Up	1.15156	0.108076	2.31275e-05
ISC/EB-prol	LOC5573058	LOC109418574	LOC5573058|AAEL010247	Up	1.14962	0.130826	0.000225767
ISC/EB-prol	LOC5572672	LOC109420136	LOC5572672|AAEL001852	Up	1.14843	0.0646474	3.38965e-05
ISC/EB-prol	LOC5573409	LOC109401907	LOC5573409|AAEL026571	Up	1.14666	0.13038	6.08569e-05
ISC/EB-prol	LOC5571127	LOC109422442	LOC5571127|AAEL019751	Up	1.13659	0.109059	3.37486e-05
ISC/EB-prol	LOC5570228	LOC109407197	LOC5570228|AAEL008185	Up	1.13472	0.0992865	7.94123e-05
ISC/EB-prol	LOC5570932	LOC115266368	LOC5570932|AAEL008671	Up	1.13349	0.0772121	4.44888e-06
ISC/EB-prol	LOC5572923	LOC109432898	LOC5572923|AAEL010146	Up	1.13012	0.0855552	2.53384e-05
ISC/EB-prol	LOC5568890	LOC109404843	LOC5568890|AAEL007197	Up	1.12877	0.0753659	1.00121e-05
ISC/EB-prol	LOC5575181	LOC109420686	LOC5575181|AAEL000370	Up	1.12356	0.127935	6.10727e-05
ISC/EB-prol	LOC5568076	LOC109411683	LOC5568076|AAEL006520	Up	1.10869	0.081203	1.90967e-05
ISC/EB-prol	LOC110679353	LOC109401240	LOC110679353|AAEL025697	Up	1.10825	0.0700834	8.80999e-07
ISC/EB-prol	LOC5575274	LOC109413576	LOC5575274|AAEL011746	Up	1.09351	0.067934	2.63655e-06
ISC/EB-prol	LOC5568583	LOC109425830	LOC5568583|AAEL001113	Up	1.09169	0.11435	5.25432e-05
ISC/EB-prol	LOC5578454	LOC109403731	LOC5578454|AAEL000488	Up	1.07835	0.117981	6.00945e-05
ISC/EB-prol	LOC5567637	LOC109418125	LOC5567637|AAEL006224	Up	1.07658	0.126323	3.54929e-05
ISC/EB-prol	LOC5566751	LOC115253966	LOC5566751|AAEL015238	Up	1.07052	0.0879442	2.32104e-05
ISC/EB-prol	LOC5576472	LOC134285145	LOC5576472|AAEL002886	Up	1.05044	0.0434037	1.0003e-05
ISC/EB-prol	LOC5567163	LOC109398833	LOC5567163|AAEL005901	Up	1.04657	0.020596	8.5843e-05
ISC/EB-prol	LOC5569590	LOC109416014	LOC5569590|AAEL001247	Up	1.04507	0.085419	3.43671e-05
ISC/EB-prol	LOC5572931	LOC109432900	LOC5572931|AAEL010145	Up	1.04198	0.0670644	8.6781e-06
ISC/EB-prol	LOC5564934	LOC109408545	LOC5564934|AAEL022219	Up	1.04157	0.102221	6.26737e-05
ISC/EB-prol	LOC5567242	LOC115267811	LOC5567242|AAEL000883	Up	1.03561	0.0849703	2.63134e-05
ISC/EB-prol	LOC5565836	LOC109429695	LOC5565836|AAEL005017	Up	1.03554	0.0744692	1.21757e-05
ISC/EB-prol	LOC5577988	LOC109413710	LOC5577988|AAEL018039	Up	1.03493	0.130236	0.000155389
ISC/EB-prol	LOC5574634	LOC109414996	LOC5574634|AAEL020739	Up	1.03476	0.0628384	4.69035e-06
ISC/EB-prol	LOC110675610	LOC115265356	LOC110675610|AAEL026008	Up	1.02618	0.0374485	1.0899e-08
ISC/EB-prol	LOC5566973	LOC109402499	LOC5566973|AAEL005728	Up	1.02589	0.0896948	3.32943e-05
ISC/EB-prol	LOC5566731	LOC115261213	LOC5566731|AAEL005600	Up	1.02375	0.146676	0.000289065
ISC/EB-prol	LOC5573370	LOC109429778	LOC5573370|AAEL010470	Up	1.02338	0.103583	7.83106e-05
ISC/EB-prol	LOC5574701	LOC109409472	LOC5574701|AAEL027910	Up	1.02234	0.0742127	1.69551e-05
ISC/EB-prol	LOC5579028	LOC109421719	LOC5579028|AAEL013963	Up	1.02178	0.136394	0.000157016
ISC/EB-prol	LOC5572432	LOC109417181	LOC5572432|AAEL001810	Up	1.01777	0.125899	4.91737e-05
ISC/EB-prol	LOC5579472	LOC115254562	LOC5579472|AAEL007650	Up	1.00524	0.0683773	8.77977e-06
ISC/EB-prol	LOC5569026	LOC115266598	LOC5569026|AAEL007322	Up	0.998121	0.0740757	1.72359e-05
ISC/EB-prol	LOC5568481	LOC109423339	LOC5568481|AAEL006879	Up	0.998115	0.0894913	2.81352e-05
ISC/EB-prol	LOC5567141	LOC109410007	LOC5567141|AAEL019742	Up	0.993677	0.0952113	8.02861e-05
ISC/EB-prol	LOC5571113	LOC109422416	LOC5571113|AAEL001509	Up	0.987478	0.140592	0.000235965
ISC/EB-prol	LOC5575831	LOC109413226	LOC5575831|AAEL012099	Up	0.986284	0.0612333	1.55958e-06
ISC/EB-prol	LOC5573849	LOC109409296	LOC5573849|AAEL010766	Up	0.981504	0.122979	8.01171e-05
ISC/EB-prol	LOC5565760	LOC109621964	LOC5565760|AAEL004981	Up	0.980899	0.103169	3.65461e-05
ISC/EB-prol	LOC5564589	LOC109404018	LOC5564589|AAEL004345	Up	0.973175	0.10583	4.02435e-05
ISC/EB-prol	LOC5566136	LOC109409662	LOC5566136|AAEL005206	Up	0.972236	0.10591	3.35364e-05
ISC/EB-prol	LOC23687735	LOC109400776	LOC23687735|AAEL017315	Up	0.96978	0.0555243	6.70294e-07
ISC/EB-prol	LOC5578084	LOC109397880	LOC5578084|AAEL023644	Up	0.96955	0.140176	0.000135132
ISC/EB-prol	LOC5570090	LOC109418954	LOC5570090|AAEL001356	Up	0.967459	0.102466	0.00014936
ISC/EB-prol	LOC5573858	LOC115258746	LOC5573858|AAEL010782	Up	0.966118	0.114467	5.66913e-05
ISC/EB-prol	LOC5576124	LOC115259220	LOC5576124|AAEL002811	Up	0.963347	0.110279	9.74137e-05
ISC/EB-prol	LOC5565494	LOC109418673	LOC5565494|AAEL004802	Up	0.958854	0.116615	0.000129637
ISC/EB-prol	LOC5567305	LOC109412613	LOC5567305|AAEL005956	Up	0.958848	0.0884524	1.69197e-05
ISC/EB-prol	LOC5579326	LOC109621587	LOC5579326|AAEL015575	Up	0.942618	0.115368	6.69682e-05
ISC/EB-prol	LOC5572627	LOC109420973	LOC5572627|AAEL009946	Up	0.937496	0.0934164	7.70172e-05
ISC/EB-prol	LOC5568938	LOC109409140	LOC5568938|AAEL007246	Up	0.930128	0.104003	3.61087e-05
ISC/EB-prol	LOC5579278	LOC109410717	LOC5579278|AAEL015631	Up	0.92788	0.112062	0.000116525
ISC/EB-prol	LOC5580056	LOC115267212	LOC5580056|AAEL002174	Up	0.926615	0.122233	0.000232164
ISC/EB-prol	LOC5568431	LOC109414163	LOC5568431|AAEL006835	Up	0.925188	0.134169	0.000274936
ISC/EB-prol	LOC5563780	LOC109428106	LOC5563780|AAEL019562	Up	0.921339	0.115237	3.90882e-05
ISC/EB-prol	LOC5576102	LOC109408469	LOC5576102|AAEL002779	Up	0.911383	0.129578	0.000168794
ISC/EB-prol	LOC5569522	LOC109404606	LOC5569522|AAEL007705	Up	0.910026	0.122575	8.37452e-05
ISC/EB-prol	LOC5566228	LOC115255627	LOC5566228|AAEL005266	Up	0.909445	0.0161014	4.73676e-05
ISC/EB-prol	LOC5574502	LOC109409309	LOC5574502|AAEL002375	Up	0.90695	0.123561	8.00266e-05
ISC/EB-prol	LOC5570245	LOC109399839	LOC5570245|AAEL023182	Up	0.902532	0.112439	0.000120356
ISC/EB-prol	LOC5566864	LOC109408984	LOC5566864|AAEL000847	Up	0.901832	0.0959033	6.92393e-06
ISC/EB-prol	LOC5575642	LOC109405470	LOC5575642|AAEL011985	Up	0.901383	0.0799444	2.55472e-05
ISC/EB-prol	LOC5576251	LOC109425617	LOC5576251|AAEL012409	Up	0.89372	0.127752	0.000290324
ISC/EB-prol	LOC5575011	LOC109414777	LOC5575011|AAEL011564	Up	0.891073	0.0702747	5.8443e-05
ISC/EB-prol	LOC5566585	LOC109420345	LOC5566585|AAEL000759	Up	0.887158	0.0980156	0.000118397
ISC/EB-prol	LOC5578793	LOC109398643	LOC5578793|AAEL003676	Up	0.878728	0.0585474	1.33892e-05
ISC/EB-prol	LOC5578090	LOC109398778	LOC5578090|AAEL003415	Up	0.869629	0.0656376	9.91831e-06
ISC/EB-prol	LOC5572753	LOC109407929	LOC5572753|AAEL010018	Up	0.86322	0.0550632	4.29689e-06
ISC/EB-prol	LOC5573418	LOC109404924	LOC5573418|AAEL002083	Up	0.862994	0.0359299	9.07471e-05
ISC/EB-prol	LOC5565366	LOC109400327	LOC5565366|AAEL004739	Up	0.857656	0.118996	0.000191365
ISC/EB-prol	LOC5565405	LOC109407918	LOC5565405|AAEL014843	Up	0.856473	0.0601621	1.98672e-05
ISC/EB-prol	LOC5571825	LOC115265270	LOC5571825|AAEL001698	Up	0.855037	0.0638297	2.24559e-05
ISC/EB-prol	LOC5569566	LOC109422035	LOC5569566|AAEL007752	Up	0.853901	0.0485358	1.73488e-07
ISC/EB-prol	LOC23687502	LOC109401390	LOC23687502|AAEL017082	Up	0.852989	0.0987275	9.46536e-05
ISC/EB-prol	LOC5578207	LOC109407818	LOC5578207|AAEL003462	Up	0.850951	0.079671	7.25889e-05
ISC/EB-prol	LOC5571461	LOC109432412	LOC5571461|AAEL009092	Up	0.848898	0.057151	6.79663e-06
ISC/EB-prol	LOC5569309	LOC109414312	LOC5569309|AAEL007556	Up	0.846508	0.109637	5.68009e-05
ISC/EB-prol	LOC5563589	LOC109415495	LOC5563589|AAEL000090	Up	0.845267	0.0707279	3.11208e-05
ISC/EB-prol	LOC5578596	LOC109399409	LOC5578596|AAEL013778	Up	0.839624	0.0762958	5.98833e-05
ISC/EB-prol	LOC5577095	LOC109401160	LOC5577095|AAEL012994	Up	0.833086	0.116549	8.2749e-05
ISC/EB-prol	LOC5577227	LOC109412925	LOC5577227|AAEL003130	Up	0.830929	0.0654356	2.49194e-06
ISC/EB-prol	LOC5577421	LOC109420080	LOC5577421|AAEL003151	Up	0.827199	0.112459	7.36633e-05
ISC/EB-prol	LOC5575338	LOC109403400	LOC5575338|AAEL002615	Up	0.826195	0.0768121	2.13357e-05
ISC/EB-prol	LOC5568940	LOC109421536	LOC5568940|AAEL007236	Up	0.824069	0.1348	0.000366092
ISC/EB-prol	LOC5575301	LOC109405035	LOC5575301|AAEL023523	Up	0.822815	0.0836645	4.37643e-05
ISC/EB-prol	LOC5564469	LOC109404943	LOC5564469|AAEL014452	Up	0.816086	0.0766218	7.42815e-05
ISC/EB-prol	LOC5577678	LOC109410892	LOC5577678|AAEL013314	Up	0.815662	0.109427	6.3911e-05
ISC/EB-prol	LOC5576220	LOC134291861	LOC5576220|AAEL002834	Up	0.811501	0.0605405	3.84386e-06
ISC/EB-prol	LOC5568247	LOC109405902	LOC5568247|AAEL006663	Up	0.811399	0.10819	0.000307798
ISC/EB-prol	LOC5569267	LOC109413270	LOC5569267|AAEL007509	Up	0.811089	0.112576	7.45546e-05
ISC/EB-prol	LOC5571141	LOC115254008	LOC5571141|AAEL019603	Up	0.810582	0.109921	1.06847e-05
ISC/EB-prol	LOC5577250	LOC109415577	LOC5577250|AAEL027982	Up	0.8088	0.108842	0.000212425
ISC/EB-prol	LOC5570347	LOC115270285	LOC5570347|AAEL001389	Up	0.804403	0.127122	0.000325879
ISC/EB-prol	LOC5567448	LOC109397409	LOC5567448|AAEL006091	Up	0.803081	0.10173	7.03165e-05
ISC/EB-prol	LOC5580160	LOC109417025	LOC5580160|AAEL011397	Up	0.79143	0.0998996	9.32651e-05
ISC/EB-prol	LOC5579837	LOC115264563	LOC5579837|AAEL005846	Up	0.787698	0.113696	0.000333162
ISC/EB-prol	LOC5574345	LOC109398015	LOC5574345|AAEL002324	Up	0.783163	0.128176	9.60964e-05
ISC/EB-prol	LOC5572224	LOC109422358	LOC5572224|AAEL009658	Up	0.781718	0.090276	1.4855e-05
ISC/EB-prol	LOC5580062	LOC109415195	LOC5580062|AAEL002135	Up	0.781545	0.108453	8.38888e-05
ISC/EB-prol	LOC5566237	LOC109420220	LOC5566237|AAEL005276	Up	0.781288	0.108395	0.000201666
ISC/EB-prol	LOC5574220	LOC115253916	LOC5574220|AAEL010991	Up	0.78121	0.0822569	5.85666e-05
ISC/EB-prol	LOC5564183	LOC115260119	LOC5564183|AAEL004121	Up	0.780453	0.117105	0.000232727
ISC/EB-prol	LOC5569427	LOC109407961	LOC5569427|AAEL007624	Up	0.773372	0.0826548	5.14727e-05
ISC/EB-prol	LOC5564399	LOC109402216	LOC5564399|AAEL004227	Up	0.771735	0.086151	6.10771e-05
ISC/EB-prol	LOC5574649	LOC109431186	LOC5574649|AAEL011293	Up	0.771585	0.0767014	0.000165458
ISC/EB-prol	LOC5579796	LOC115253931	LOC5579796|AAEL003976	Up	0.770534	0.0840872	2.65839e-05
ISC/EB-prol	LOC5578843	LOC109428701	LOC5578843|AAEL003731	Up	0.769854	0.122825	0.000349766
ISC/EB-prol	LOC5576488	LOC109403530	LOC5576488|AAEL002900	Up	0.767793	0.0695743	9.70485e-06
ISC/EB-prol	LOC5572534	LOC109431657	LOC5572534|AAEL009859	Up	0.764774	0.0327812	3.19492e-07
ISC/EB-prol	LOC5572994	LOC115254133	LOC5572994|AAEL001937	Up	0.760927	0.108487	0.000104248
ISC/EB-prol	LOC5579484	LOC109404349	LOC5579484|AAEL015298	Up	0.756593	0.0912926	8.97741e-05
ISC/EB-prol	LOC5574042	LOC109398071	LOC5574042|AAEL010879	Up	0.754692	0.112389	6.80973e-05
ISC/EB-prol	LOC5571267	LOC109423373	LOC5571267|AAEL001573	Up	0.754377	0.122405	0.000236756
ISC/EB-prol	LOC5564929	LOC115262101	LOC5564929|AAEL004488	Up	0.751972	0.101846	4.74095e-05
ISC/EB-prol	LOC5574542	LOC109428654	LOC5574542|AAEL011216	Up	0.747887	0.0794997	6.03394e-05
ISC/EB-prol	LOC5566142	LOC109409668	LOC5566142|AAEL005175	Up	0.74679	0.113114	0.000279901
ISC/EB-prol	LOC5575683	LOC109409336	LOC5575683|AAEL011989	Up	0.746108	0.114269	0.000281542
ISC/EB-prol	LOC5574747	LOC109415242	LOC5574747|AAEL019990	Up	0.743257	0.109812	0.000291962
ISC/EB-prol	LOC5574458	LOC109408684	LOC5574458|AAEL011180	Up	0.74243	0.0351082	1.49924e-06
ISC/EB-prol	LOC5573374	LOC109430715	LOC5573374|AAEL010464	Up	0.735061	0.0675797	5.01746e-05
ISC/EB-prol	LOC5566687	LOC109407580	LOC5566687|AAEL005558	Up	0.734253	0.0453321	5.85678e-07
ISC/EB-prol	LOC5566763	LOC109425656	LOC5566763|AAEL012410	Up	0.721917	0.100251	0.000190237
ISC/EB-prol	LOC5564400	LOC109412996	LOC5564400|AAEL004235	Up	0.719548	0.116254	0.000301647
ISC/EB-prol	LOC5571153	LOC109427897	LOC5571153|AAEL008849	Up	0.71195	0.076922	5.55875e-05
ISC/EB-prol	LOC5577996	LOC109413708	LOC5577996|AAEL003396	Up	0.711083	0.0154052	2.94204e-05
ISC/EB-prol	LOC5571016	LOC115257693	LOC5571016|AAEL008739	Up	0.710039	0.095418	0.000123438
ISC/EB-prol	LOC5564117	LOC109407623	LOC5564117|AAEL019408	Up	0.708556	0.0429501	3.98317e-06
ISC/EB-prol	LOC5573523	LOC109427495	LOC5573523|AAEL024184	Up	0.706027	0.0849474	0.000218094
ISC/EB-prol	LOC5564161	LOC109407834	LOC5564161|AAEL004148	Up	0.704581	0.0538473	5.15443e-06
ISC/EB-prol	LOC5575137	LOC109400747	LOC5575137|AAEL000378	Up	0.704327	0.08465	8.68963e-05
ISC/EB-prol	LOC5572548	LOC109409462	LOC5572548|AAEL009874	Up	0.696261	0.119067	0.00019408
ISC/EB-prol	LOC5577203	LOC109401184	LOC5577203|AAEL013102	Up	0.696134	0.123204	0.000404298
ISC/EB-prol	LOC5575405	LOC109433369	LOC5575405|AAEL011810	Up	0.696122	0.126946	0.000665989
ISC/EB-prol	LOC5573328	LOC109416369	LOC5573328|AAEL010411	Up	0.690345	0.0545746	5.2441e-05
ISC/EB-prol	LOC5580057	LOC109428393	LOC5580057|AAEL002170	Up	0.685292	0.10179	7.42911e-05
ISC/EB-prol	LOC5578389	LOC109428364	LOC5578389|AAEL013679	Up	0.682776	0.0718085	6.06846e-05
ISC/EB-prol	LOC5580194	LOC109425310	LOC5580194|AAEL002539	Up	0.678785	0.0676207	0.000686516
ISC/EB-prol	LOC5574420	LOC109409975	LOC5574420|AAEL019780	Up	0.665309	0.119514	0.000445717
ISC/EB-prol	LOC5579190	LOC109414512	LOC5579190|AAEL003899	Up	0.664292	0.14593	0.000920925
ISC/EB-prol	LOC5571387	LOC109622784	LOC5571387|AAEL009026	Up	0.658622	0.0622021	1.46428e-05
ISC/EB-prol	LOC5569042	LOC115266748	LOC5569042|AAEL007332	Up	0.65593	0.0935319	6.54829e-05
ISC/EB-prol	LOC5580095	LOC109412594	LOC5580095|AAEL002137	Up	0.655161	0.10093	0.000318974
ISC/EB-prol	LOC5568914	LOC109414745	LOC5568914|AAEL007209	Up	0.650685	0.0946541	0.000184634
ISC/EB-prol	LOC5565217	LOC109420362	LOC5565217|AAEL004669	Up	0.649045	0.0702238	3.84436e-05
ISC/EB-prol	LOC5570505	LOC109406436	LOC5570505|AAEL001411	Up	0.646657	0.0456463	9.89211e-08
ISC/EB-prol	LOC5569288	LOC109621284	LOC5569288|AAEL007547	Up	0.645286	0.0723872	0.000800782
ISC/EB-prol	LOC5579101	LOC109399110	LOC5579101|AAEL003842	Up	0.639951	0.11955	0.000172182
ISC/EB-prol	LOC5578276	LOC115267037	LOC5578276|AAEL003503	Up	0.638917	0.0769744	7.83967e-05
ISC/EB-prol	LOC5566822	LOC109425677	LOC5566822|AAEL005666	Up	0.636646	0.128895	0.000343167
ISC/EB-prol	LOC5578303	LOC109404988	LOC5578303|AAEL013613	Up	0.63218	0.125795	0.00028994
ISC/EB-prol	LOC5571140	LOC109427913	LOC5571140|AAEL008854	Up	0.630627	0.103008	0.000343283
ISC/EB-prol	LOC5565883	LOC115262131	LOC5565883|AAEL019474	Up	0.625537	0.112346	0.000265142
ISC/EB-prol	LOC5569269	LOC109430375	LOC5569269|AAEL007518	Up	0.616873	0.12435	0.000649132
ISC/EB-prol	LOC5572430	LOC109417135	LOC5572430|AAEL001830	Up	0.6161	0.138365	0.000745014
ISC/EB-prol	LOC5564072	LOC115260703	LOC5564072|AAEL004067	Up	0.613903	0.0593199	4.05445e-06
ISC/EB-prol	LOC5565891	LOC109429540	LOC5565891|AAEL000706	Up	0.613044	0.0555199	2.59046e-05
ISC/EB-prol	LOC5573292	LOC109408666	LOC5573292|AAEL010371	Up	0.611802	0.0931342	9.50468e-05
ISC/EB-prol	LOC5575377	LOC109414179	LOC5575377|AAEL011778	Up	0.611732	0.105588	0.000270272
ISC/EB-prol	LOC5576650	LOC109428068	LOC5576650|AAEL012684	Up	0.611145	0.062357	2.84011e-05
ISC/EB-prol	LOC5573682	LOC109422350	LOC5573682|AAEL010665	Up	0.607967	0.109644	0.000367029
ISC/EB-prol	LOC5570070	LOC109403034	LOC5570070|AAEL001352	Up	0.603139	0.110143	0.00042702
ISC/EB-prol	LOC110676984	LOC109416261	LOC110676984|AAEL010348	Up	0.602333	0.126441	0.00036414
ISC/EB-prol	LOC5579901	LOC109410391	LOC5579901|AAEL001052	Up	0.602319	0.0613749	4.8859e-05
ISC/EB-prol	LOC5568195	LOC109398302	LOC5568195|AAEL006619	Up	0.595925	0.0972557	0.000116164
ISC/EB-prol	LOC5569553	LOC109397190	LOC5569553|AAEL007758	Up	0.594168	0.111496	0.000177639
ISC/EB-prol	LOC5579853	LOC109399010	LOC5579853|AAEL005845	Up	0.592779	0.0706428	5.07341e-05
ISC/EB-prol	LOC5565629	LOC109423532	LOC5565629|AAEL014913	Up	0.592356	0.0611255	4.84238e-06
ISC/EB-prol	LOC5565148	LOC109413335	LOC5565148|AAEL004620	Up	0.588931	0.0596019	1.79334e-06
ISC/EB-prol	LOC5570591	LOC109397641	LOC5570591|AAEL008408	Up	0.588417	0.0611139	2.59889e-06
ISC/EB-prol	LOC5564477	LOC109420918	LOC5564477|AAEL014484	Up	0.585509	0.0615692	8.94245e-06
ISC/EB-prol	LOC5565922	LOC109429544	LOC5565922|AAEL000709	Up	0.579271	0.0913782	0.000270739
ISC/EB-prol	LOC5577899	LOC109621239	LOC5577899|AAEL019883	Up	0.578316	0.120166	0.000503623
ISC/EB-prol	LOC5573319	LOC115253499	LOC5573319|AAEL010403	Up	0.576026	0.0783659	5.84903e-05
ISC/EB-prol	LOC5572725	LOC109621625	LOC5572725|AAEL009994	Up	0.575252	0.0205974	1.06943e-07
ISC/EB-prol	LOC5568801	LOC109419584	LOC5568801|AAEL001190	Up	0.574742	0.103478	0.000247781
ISC/EB-prol	LOC5567160	LOC109398869	LOC5567160|AAEL005910	Up	0.571075	0.074195	0.000122803
ISC/EB-prol	LOC5578243	LOC115268659	LOC5578243|AAEL015006	Up	0.570085	0.0149229	2.6127e-05
ISC/EB-prol	LOC5572799	LOC134287652	LOC5572799|AAEL001904	Up	0.567537	0.0765138	7.80648e-05
ISC/EB-prol	LOC5566772	LOC109397884	LOC5566772|AAEL005629	Up	0.566028	0.0137105	7.23932e-05
ISC/EB-prol	LOC5570214	LOC109426339	LOC5570214|AAEL008154	Up	0.565428	0.0767783	0.000108663
ISC/EB-prol	LOC5564517	LOC109417965	LOC5564517|AAEL004291	Up	0.564179	0.106776	0.000245461
ISC/EB-prol	LOC5570619	LOC115266711	LOC5570619|AAEL008425	Up	0.561106	0.124631	0.00109033
ISC/EB-prol	LOC5566222	LOC109397351	LOC5566222|AAEL025226	Up	0.557972	0.141459	0.00154191
ISC/EB-prol	LOC5579990	LOC109413961	LOC5579990|AAEL001742	Up	0.557423	0.127228	0.0010462
ISC/EB-prol	LOC110676235	LOC109404276	LOC110676235|AAEL022750	Up	0.557142	0.0749671	3.40922e-05
ISC/EB-prol	LOC110678983	LOC115271083	LOC110678983|AAEL025807	Up	0.556577	0.124411	0.00106792
ISC/EB-prol	LOC5569157	LOC109422689	LOC5569157|AAEL022180	Up	0.556006	0.114256	0.000375132
ISC/EB-prol	LOC110675318	LOC109422005	LOC110675318|-	Up	0.555663	0.107204	0.000344324
ISC/EB-prol	LOC110673983	LOC109402949	LOC110673983|AAEL003281	Up	0.551734	0.0990075	0.000228376
ISC/EB-prol	LOC5576765	LOC109428956	LOC5576765|AAEL012746	Up	0.550413	0.0520908	3.5975e-05
ISC/EB-prol	LOC5579654	LOC109424429	LOC5579654|AAEL003970	Up	0.541905	0.117642	0.000856554
ISC/EB-prol	LOC5575037	LOC109421944	LOC5575037|AAEL011587	Up	0.538707	0.0159723	5.952e-05
ISC/EB-prol	LOC5574363	LOC109404738	LOC5574363|AAEL011081	Up	0.537534	0.113184	0.000442247
ISC/EB-prol	LOC5575822	LOC109430552	LOC5575822|AAEL012092	Up	0.533534	0.0810688	0.000122193
ISC/EB-prol	LOC5570175	LOC109623352	LOC5570175|AAEL014154	Up	0.532239	0.101435	0.000366031
ISC/EB-prol	LOC5568465	LOC109621632	LOC5568465|AAEL006860	Up	0.529966	0.0183505	3.98117e-05
ISC/EB-prol	LOC5574069	LOC115267652	LOC5574069|nan	Up	0.5284	0.0849192	0.000112392
ISC/EB-prol	LOC5574958	LOC109412044	LOC5574958|AAEL011560	Up	0.527831	0.120263	0.000698969
ISC/EB-prol	LOC5578459	LOC109403729	LOC5578459|AAEL000486	Up	0.522282	0.0459	0.000404807
ISC/EB-prol	LOC5573464	LOC109417792	LOC5573464|AAEL010508	Up	0.521732	0.120846	0.000974365
ISC/EB-prol	LOC5576483	LOC109422943	LOC5576483|AAEL002898	Up	0.520649	0.138031	0.00191771
ISC/EB-prol	LOC5575533	LOC109397140	LOC5575533|AAEL011912	Up	0.520299	0.102155	0.000413731
ISC/EB-prol	LOC23687827	LOC109424044	LOC23687827|AAEL025574	Up	0.519846	0.122916	0.000727389
ISC/EB-prol	LOC5572255	LOC109397774	LOC5572255|AAEL009681	Up	0.516035	0.065146	0.00108204
ISC/EB-prol	LOC5567961	LOC109421631	LOC5567961|AAEL006420	Up	0.514633	0.0766475	2.70627e-05
ISC/EB-prol	LOC5571906	LOC109409843	LOC5571906|AAEL009398	Up	0.514597	0.116892	0.000598478
ISC/EB-prol	LOC110675665	LOC109416467	LOC110675665|AAEL028005	Up	0.514144	0.0950465	0.000341571
ISC/EB-prol	LOC5566589	LOC115257360	LOC5566589|AAEL019580	Up	0.511605	0.125449	0.00167894
ISC/EB-prol	LOC5568526	LOC109427321	LOC5568526|AAEL006946	Up	0.51095	0.0553887	3.32737e-05
ISC/EB-prol	LOC5575715	LOC109431784	LOC5575715|AAEL012026	Up	0.510723	0.0370138	1.0876e-05
ISC/EB-prol	LOC5569822	LOC109429650	LOC5569822|AAEL001312	Up	0.509559	0.0840391	0.000136222
ISC/EB-prol	LOC5565513	LOC109409788	LOC5565513|AAEL014863	Up	0.508914	0.133775	0.00149493
ISC/EB-prol	LOC5569700	LOC109429880	LOC5569700|AAEL007845	Up	0.507115	0.0579774	6.83698e-05
ISC/EB-prol	LOC5566699	LOC109425852	LOC5566699|AAEL019458	Up	0.506166	0.106527	0.000606233
ISC/EB-prol	LOC5573625	LOC115262731	LOC5573625|AAEL010610	Up	0.505015	0.126795	0.00174201
ISC/EB-prol	LOC5568228	LOC115257864	LOC5568228|AAEL006649	Up	0.504207	0.135032	0.00106971
ISC/EB-prol	LOC5579091	LOC109409886	LOC5579091|AAEL023746	Up	0.501641	0.132245	0.00151061
ISC/EB-prol	LOC5578119	LOC109399656	LOC5578119|AAEL003412	Up	0.49569	0.107787	0.000483342
ISC/EB-prol	LOC5570828	LOC109417504	LOC5570828|AAEL008605	Up	0.488244	0.129725	0.00190601
ISC/EB-prol	LOC5576287	LOC109425514	LOC5576287|AAEL012439	Up	0.483693	0.121068	0.000700355
ISC/EB-prol	LOC5572484	LOC109406727	LOC5572484|AAEL019518	Up	0.481919	0.138924	0.00254286
ISC/EB-prol	LOC5578388	LOC134291351	LOC5578388|AAEL013675	Up	0.480826	0.0633836	3.15797e-05
ISC/EB-prol	LOC5569968	LOC109425587	LOC5569968|AAEL020092	Up	0.48044	0.0436446	2.26902e-06
ISC/EB-prol	LOC5573337	LOC109413689	LOC5573337|AAEL010430	Up	0.479741	0.13793	0.00195315
ISC/EB-prol	LOC5573515	LOC109398797	LOC5573515|AAEL010561	Up	0.47804	0.125397	0.0017024
ISC/EB-prol	LOC5564884	LOC109430456	LOC5564884|AAEL004474	Up	0.471489	0.124238	0.00178842
ISC/EB-prol	LOC5565962	LOC109423643	LOC5565962|AAEL005220	Up	0.470995	0.0162042	9.64646e-05
ISC/EB-prol	LOC5565647	LOC109397339	LOC5565647|AAEL004913	Up	0.470694	0.0866938	0.000190239
ISC/EB-prol	LOC5573046	LOC115257057	LOC5573046|AAEL010224	Up	0.470092	0.120558	0.000873568
ISC/EB-prol	LOC5564925	LOC109426506	LOC5564925|AAEL019568	Up	0.469407	0.0263463	6.11287e-06
ISC/EB-prol	LOC5565700	LOC109412353	LOC5565700|AAEL004930	Up	0.468633	0.0813153	0.00212142
ISC/EB-prol	LOC5578443	LOC109403714	LOC5578443|AAEL000485	Up	0.467638	0.124465	0.00136444
ISC/EB-prol	LOC5573851	LOC109409294	LOC5573851|AAEL010777	Up	0.466952	0.0333876	3.12592e-05
ISC/EB-prol	LOC5576151	LOC109412833	LOC5576151|AAEL012341	Up	0.465079	0.102548	0.000763591
ISC/EB-prol	LOC5578562	LOC109418342	LOC5578562|AAEL019589	Up	0.461137	0.113281	0.000844691
ISC/EB-prol	LOC5564787	LOC109417150	LOC5564787|AAEL004435	Up	0.458586	0.093744	0.000594223
ISC/EB-prol	LOC5567836	LOC109416910	LOC5567836|AAEL001009	Up	0.458534	0.0658975	7.45086e-05
ISC/EB-prol	LOC5569443	LOC109419705	LOC5569443|AAEL001232	Up	0.455614	0.114184	0.00131959
ISC/EB-prol	LOC5579186	LOC109404863	LOC5579186|AAEL003872	Up	0.455298	0.017552	7.36632e-05
ISC/EB-prol	LOC5568648	LOC109428190	LOC5568648|AAEL007015	Up	0.454511	0.126828	0.00193115
ISC/EB-prol	LOC23687516	LOC109418072	LOC23687516|AAEL017096	Up	0.453841	0.0144475	6.04555e-05
ISC/EB-prol	LOC5573763	LOC115265304	LOC5573763|AAEL000269	Up	0.453759	0.0260678	8.74521e-06
ISC/EB-prol	LOC5570068	LOC109429505	LOC5570068|AAEL001331	Up	0.453482	0.0820817	0.000161406
ISC/EB-prol	LOC5577205	LOC115253502	LOC5577205|AAEL027164	Up	0.452047	0.122224	0.00155243
ISC/EB-prol	LOC5569497	LOC109622877	LOC5569497|AAEL007681	Up	0.450384	0.100576	0.000517749
ISC/EB-prol	LOC5567126	LOC109419650	LOC5567126|AAEL005879	Up	0.450037	0.0802031	0.000326028
ISC/EB-prol	LOC5566694	LOC109407584	LOC5566694|AAEL005580	Up	0.445878	0.124612	0.0021384
ISC/EB-prol	LOC5571449	LOC109411464	LOC5571449|AAEL009085	Up	0.44475	0.0959659	0.000558804
ISC/EB-prol	LOC5575820	LOC109430553	LOC5575820|AAEL012093	Up	0.44228	0.122991	0.00241728
ISC/EB-prol	LOC5571428	LOC134287922	LOC5571428|AAEL009061	Up	0.441084	0.129487	0.00206417
ISC/EB-prol	LOC5570837	LOC109414950	LOC5570837|AAEL018695	Up	0.439382	0.134037	0.0022159
ISC/EB-prol	LOC5565652	LOC109397340	LOC5565652|AAEL004902	Up	0.438418	0.0733422	0.000114642
ISC/EB-prol	LOC5576244	LOC109422254	LOC5576244|AAEL002851	Up	0.438221	0.0394864	2.71055e-05
ISC/EB-prol	LOC5576039	LOC109415865	LOC5576039|AAEL012280	Up	0.437253	0.083917	0.000328879
ISC/EB-prol	LOC5568112	LOC109398638	LOC5568112|AAEL006566	Up	0.43639	0.110819	0.00143095
ISC/EB-prol	LOC5568996	LOC134291205	LOC5568996|AAEL007290	Up	0.435808	0.134667	0.0036003
ISC/EB-prol	LOC5576045	LOC109622626	LOC5576045|AAEL012272	Up	0.434742	0.111145	0.00202067
ISC/EB-prol	LOC5564556	LOC109427514	LOC5564556|AAEL004325	Up	0.433701	0.0168199	0.000121132
ISC/EB-prol	LOC5579659	LOC109424426	LOC5579659|AAEL003955	Up	0.433523	0.1279	0.0031273
ISC/EB-prol	LOC5580329	LOC109420083	LOC5580329|AAEL013069	Up	0.433414	0.0196135	1.49549e-05
ISC/EB-prol	LOC5567433	LOC109397423	LOC5567433|AAEL006098	Up	0.433121	0.0975283	0.000331633
ISC/EB-prol	LOC5569863	LOC115255337	LOC5569863|AAEL007945	Up	0.43301	0.0320954	2.87304e-06
ISC/EB-prol	LOC5569670	LOC109406360	LOC5569670|AAEL007824	Up	0.431792	0.0171454	0.000116685
ISC/EB-prol	LOC5578839	LOC109432534	LOC5578839|AAEL019482	Up	0.43041	0.0586542	7.01402e-05
ISC/EB-prol	LOC5570654	LOC109427482	LOC5570654|AAEL008458	Up	0.429277	0.109641	0.00147341
ISC/EB-prol	LOC5576896	LOC109418604	LOC5576896|AAEL003039	Up	0.427656	0.045608	2.90741e-05
ISC/EB-prol	LOC5567495	LOC109622177	LOC5567495|AAEL000934	Up	0.427629	0.0595854	2.16601e-05
ISC/EB-prol	LOC5573312	LOC109416387	LOC5573312|AAEL010416	Up	0.42591	0.073661	0.000128499
ISC/EB-prol	LOC5573217	LOC109425778	LOC5573217|AAEL010299	Up	0.4243	0.0146898	0.000133885
ISC/EB-prol	LOC5571107	LOC109417180	LOC5571107|AAEL001526	Up	0.424086	0.119178	0.00272356
ISC/EB-prol	LOC5569186	LOC109429432	LOC5569186|AAEL007447	Up	0.423323	0.131004	0.00339932
ISC/EB-prol	LOC5568114	LOC109419715	LOC5568114|AAEL006551	Up	0.421254	0.126083	0.00305503
ISC/EB-prol	LOC110676045	LOC109425736	LOC110676045|AAEL022286	Up	0.415669	0.0143156	8.9408e-05
ISC/EB-prol	LOC5571208	LOC109432273	LOC5571208|AAEL008893	Up	0.414353	0.0756224	0.000196108
ISC/EB-prol	LOC5569582	LOC109408226	LOC5569582|AAEL007771	Up	0.409773	0.0154117	0.000156325
ISC/EB-prol	LOC5573942	LOC109421313	LOC5573942|AAEL019793	Up	0.405014	0.107373	0.00138169
ISC/EB-prol	LOC5568522	LOC109426522	LOC5568522|AAEL006934	Up	0.404798	0.13582	0.00539892
ISC/EB-prol	LOC5569547	LOC109433182	LOC5569547|AAEL007718	Up	0.404262	0.0476592	1.50318e-05
ISC/EB-prol	LOC5570276	LOC109409733	LOC5570276|AAEL008216	Up	0.403938	0.125566	0.00239952
ISC/EB-prol	LOC5571047	LOC109424237	LOC5571047|AAEL008768	Up	0.403069	0.0515514	1.86105e-05
ISC/EB-prol	LOC5577132	LOC134291577	LOC5577132|AAEL023019	Up	0.401476	0.096459	0.00124552
ISC/EB-prol	LOC5568319	LOC109406578	LOC5568319|AAEL006727	Up	0.401261	0.0932812	0.00119191
ISC/EB-prol	LOC5567858	LOC134284463	LOC5567858|AAEL006321	Up	0.400847	0.100375	0.000809349
ISC/EB-prol	LOC5564768	LOC109417152	LOC5564768|AAEL004434	Up	0.40025	0.0396605	2.35378e-05
ISC/EB-prol	LOC5570080	LOC109431766	LOC5570080|AAEL001336	Up	0.399119	0.0642821	0.000467955
ISC/EB-prol	LOC5566959	LOC109422770	LOC5566959|AAEL005722	Up	0.395935	0.0153612	0.000149195
ISC/EB-prol	LOC5567660	LOC109416816	LOC5567660|AAEL012740	Up	0.395802	0.0212605	1.02622e-05
ISC/EB-prol	LOC5573830	LOC109401290	LOC5573830|AAEL010754	Up	0.395024	0.0310257	1.95084e-05
ISC/EB-prol	LOC5573751	LOC109424463	LOC5573751|AAEL000294	Up	0.394824	0.0513708	0.000109837
ISC/EB-prol	LOC5575668	LOC109429786	LOC5575668|AAEL002687	Up	0.393612	0.0951419	0.00119131
ISC/EB-prol	LOC5566143	LOC109417297	LOC5566143|AAEL005213	Up	0.393527	0.0405122	1.84714e-05
ISC/EB-prol	LOC5566236	LOC109409973	LOC5566236|AAEL005269	Up	0.391772	0.051361	0.00014891
ISC/EB-prol	LOC5566976	LOC109402491	LOC5566976|AAEL005744	Up	0.391616	0.0547912	0.000276799
ISC/EB-prol	LOC5575085	LOC115267434	LOC5575085|AAEL011641	Up	0.390439	0.0410787	2.06649e-05
ISC/EB-prol	LOC5571564	LOC115260570	LOC5571564|AAEL009151	Up	0.389757	0.0141571	8.97999e-05
ISC/EB-prol	LOC5577478	LOC109411193	LOC5577478|AAEL013221	Up	0.388849	0.0145496	0.000104305
ISC/EB-prol	LOC5573885	LOC115253981	LOC5573885|AAEL010798	Up	0.387867	0.0644514	0.0016497
ISC/EB-prol	LOC5570419	LOC115269543	LOC5570419|AAEL008306	Up	0.387605	0.090912	0.000722641
ISC/EB-prol	LOC5568418	LOC109414175	LOC5568418|AAEL006847	Up	0.385483	0.101677	0.00129024
ISC/EB-prol	LOC5565589	LOC109415927	LOC5565589|AAEL004865	Up	0.383594	0.0304777	6.34268e-06
ISC/EB-prol	LOC5569067	LOC109418088	LOC5569067|AAEL001218	Up	0.382893	0.0745342	0.000175079
ISC/EB-prol	LOC110674166	LOC115269183	LOC110674166|AAEL020485	Up	0.381211	0.0866744	0.000671335
ISC/EB-prol	LOC5573433	LOC115264136	LOC5573433|AAEL010486	Up	0.379836	0.0634862	0.000135531
ISC/EB-prol	LOC5570054	LOC109405475	LOC5570054|AAEL000186	Up	0.377455	0.103064	0.00179042
ISC/EB-prol	LOC5563646	LOC109416769	LOC5563646|AAEL021083	Up	0.377216	0.0139432	0.000112414
ISC/EB-prol	LOC5574614	LOC109412721	LOC5574614|AAEL011248	Up	0.37588	0.0609953	0.000292427
ISC/EB-prol	LOC5572463	LOC109419733	LOC5572463|AAEL001798	Up	0.375393	0.0685639	0.000171369
ISC/EB-prol	LOC5565878	LOC109429927	LOC5565878|AAEL000679	Up	0.374247	0.0585394	0.000240322
ISC/EB-prol	LOC5570432	LOC109433111	LOC5570432|AAEL008329	Up	0.371472	0.0160257	0.000166391
ISC/EB-prol	LOC5573583	LOC109429125	LOC5573583|AAEL002130	Up	0.369229	0.0487658	8.95503e-05
ISC/EB-prol	LOC5576468	LOC109397596	LOC5576468|AAEL002903	Up	0.36875	0.0711527	0.000298816
ISC/EB-prol	LOC5577180	LOC109424711	LOC5577180|AAEL013052	Up	0.368467	0.107401	0.00195341
ISC/EB-prol	LOC5567853	LOC109430545	LOC5567853|AAEL006308	Up	0.367764	0.12388	0.0039992
ISC/EB-prol	LOC5576572	LOC109425117	LOC5576572|AAEL025570	Up	0.366431	0.0746197	0.000285537
ISC/EB-prol	LOC5572284	LOC109431664	LOC5572284|AAEL001759	Up	0.365655	0.0149938	0.00010799
ISC/EB-prol	LOC5572845	LOC109425463	LOC5572845|AAEL010057	Up	0.363784	0.124498	0.00419916
ISC/EB-prol	LOC5567972	LOC109421638	LOC5567972|AAEL006415	Up	0.361181	0.106463	0.00201138
ISC/EB-prol	LOC23687815	LOC115260377	LOC23687815|AAEL017395	Up	0.359755	0.070299	0.000315765
ISC/EB-prol	LOC5566808	LOC115254988	LOC5566808|AAEL005655	Up	0.35725	0.0896919	0.00109515
ISC/EB-prol	LOC5573211	LOC109407505	LOC5573211|AAEL010318	Up	0.355512	0.0216923	3.64542e-07
ISC/EB-prol	LOC5578146	LOC109417113	LOC5578146|AAEL013527	Up	0.35501	0.0667372	0.000249538
ISC/EB-prol	LOC5573963	LOC109401480	LOC5573963|AAEL010826	Up	0.353428	0.039165	7.07714e-05
ISC/EB-prol	LOC5577524	LOC109412434	LOC5577524|AAEL003203	Up	0.353362	0.0488593	7.66525e-05
ISC/EB-prol	LOC5569936	LOC109427500	LOC5569936|AAEL008025	Up	0.353006	0.0838427	0.00103651
ISC/EB-prol	LOC5570794	LOC109424156	LOC5570794|AAEL008569	Up	0.352593	0.105367	0.00252956
ISC/EB-prol	LOC5573412	LOC109401915	LOC5573412|AAEL002084	Up	0.35237	0.123739	0.00819836
ISC/EB-prol	LOC5570396	LOC115265342	LOC5570396|AAEL008291	Up	0.351786	0.0826156	0.000728825
ISC/EB-prol	LOC5574665	LOC109426215	LOC5574665|AAEL011309	Up	0.35113	0.0531601	5.14261e-05
ISC/EB-prol	LOC5571202	LOC109397096	LOC5571202|AAEL008902	Up	0.350218	0.126183	0.00979804
ISC/EB-prol	LOC5574166	LOC109404475	LOC5574166|AAEL019623	Up	0.348942	0.118969	0.004999
ISC/EB-prol	LOC5566538	LOC109410662	LOC5566538|AAEL018342	Up	0.348824	0.137314	0.00959808
ISC/EB-prol	LOC5569083	LOC109421653	LOC5569083|AAEL001209	Up	0.347972	0.140892	0.0183963
ISC/EB-prol	LOC5578696	LOC109423140	LOC5578696|AAEL025569	Up	0.34587	0.11382	0.00479904
ISC/EB-prol	LOC5569787	LOC109412033	LOC5569787|AAEL023098	Up	0.343925	0.0554676	0.000135537
ISC/EB-prol	LOC5572982	LOC109428667	LOC5572982|AAEL001930	Up	0.343461	0.0750221	0.000292961
ISC/EB-prol	LOC5576993	LOC109423726	LOC5576993|AAEL003064	Up	0.34199	0.0931394	0.00125337
ISC/EB-prol	LOC5573894	LOC109421343	LOC5573894|AAEL002184	Up	0.340899	0.0795804	0.000379623
ISC/EB-prol	LOC5564165	LOC109422632	LOC5564165|AAEL004147	Up	0.339173	0.12266	0.00839832
ISC/EB-prol	LOC5579851	LOC109398993	LOC5579851|AAEL005861	Up	0.338812	0.0762683	0.000779834
ISC/EB-prol	LOC5575850	LOC115253702	LOC5575850|AAEL012117	Up	0.338729	0.139539	0.0155969
ISC/EB-prol	LOC5579176	LOC134291546	LOC5579176|AAEL019783	Up	0.338424	0.125004	0.0111978
ISC/EB-prol	LOC5573827	LOC109621229	LOC5573827|AAEL010756	Up	0.338171	0.0153035	1.12155e-06
ISC/EB-prol	LOC5569183	LOC109429439	LOC5569183|AAEL007439	Up	0.335937	0.0384325	2.6376e-05
ISC/EB-prol	LOC5565237	LOC115259484	LOC5565237|AAEL014762	Up	0.331668	0.142894	0.0223955
ISC/EB-prol	LOC5571783	LOC109430224	LOC5571783|AAEL009320	Up	0.331203	0.0538267	7.05293e-05
ISC/EB-prol	LOC5567857	LOC134284727	LOC5567857|AAEL006315	Up	0.329968	0.110983	0.0039992
ISC/EB-prol	LOC5577425	LOC109427739	LOC5577425|AAEL013171	Up	0.327335	0.0835823	0.000684601
ISC/EB-prol	LOC5577439	LOC109418407	LOC5577439|AAEL019824	Up	0.322129	0.117129	0.00779844
ISC/EB-prol	LOC5573673	LOC109401345	LOC5573673|AAEL019604	Up	0.321956	0.0513136	7.7916e-05
ISC/EB-prol	LOC110676232	LOC109404346	LOC110676232|AAEL023983	Up	0.321687	0.0159392	2.03912e-07
ISC/EB-prol	LOC5568219	LOC109422753	LOC5568219|AAEL006661	Up	0.317926	0.0997786	0.00259948
ISC/EB-prol	LOC5577991	LOC134292086	LOC5577991|AAEL003383	Up	0.314501	0.0975009	0.00223532
ISC/EB-prol	LOC5578523	LOC109433178	LOC5578523|AAEL013729	Up	0.312149	0.122157	0.0113977
ISC/EB-prol	LOC5576894	LOC109424980	LOC5576894|AAEL003046	Up	0.312127	0.0475939	8.35962e-05
ISC/EB-prol	LOC5570057	LOC109405347	LOC5570057|AAEL000184	Up	0.311983	0.127696	0.0193961
ISC/EB-prol	LOC5566220	LOC115265746	LOC5566220|AAEL005270	Up	0.311528	0.056631	0.000298273
ISC/EB-prol	LOC5578123	LOC109399666	LOC5578123|AAEL003427	Up	0.310886	0.0136841	0.000137457
ISC/EB-prol	LOC5564516	LOC109623132	LOC5564516|AAEL004284	Up	0.310653	0.0599336	0.000335294
ISC/EB-prol	LOC5578622	LOC109422142	LOC5578622|AAEL003606	Up	0.309615	0.0954312	0.00280387
ISC/EB-prol	LOC5574089	LOC109623113	LOC5574089|AAEL002272	Up	0.30646	0.115507	0.0113977
ISC/EB-prol	LOC5580058	LOC115267213	LOC5580058|AAEL002155	Up	0.30638	0.0762236	0.00132318
ISC/EB-prol	LOC5569380	LOC109622900	LOC5569380|AAEL007558	Up	0.305795	0.122954	0.015197
ISC/EB-prol	LOC5575386	LOC109433123	LOC5575386|AAEL011789	Up	0.303818	0.0749397	0.000703923
ISC/EB-prol	LOC5575777	LOC109405991	LOC5575777|AAEL002701	Up	0.303209	0.103343	0.00519896
ISC/EB-prol	LOC5564626	LOC109410015	LOC5564626|AAEL014549	Up	0.301662	0.125601	0.0181964
ISC/EB-prol	LOC5572840	LOC109421726	LOC5572840|AAEL010063	Up	0.301519	0.0531552	0.000184888
ISC/EB-prol	LOC5567311	LOC134287714	LOC5567311|AAEL005965	Up	0.30132	0.0785908	0.000929752
ISC/EB-prol	LOC5574500	LOC115258752	LOC5574500|AAEL023902	Up	0.300751	0.126686	0.0253949
ISC/EB-prol	LOC5564902	LOC115263201	LOC5564902|AAEL014644	Up	0.298533	0.120549	0.0167966
ISC/EB-prol	LOC5570433	LOC109420079	LOC5570433|AAEL019748	Up	0.295005	0.0720796	0.00256657
ISC/EB-prol	LOC5572195	LOC109398023	LOC5572195|AAEL014715	Up	0.294953	0.045223	0.000104294
ISC/EB-prol	LOC5571900	LOC115258105	LOC5571900|AAEL009377	Up	0.292122	0.0661141	0.000291098
ISC/EB-prol	LOC5567031	LOC109433355	LOC5567031|AAEL005766	Up	0.291416	0.0402788	0.000857435
ISC/EB-prol	LOC5564541	LOC109427547	LOC5564541|AAEL004307	Up	0.289899	0.103089	0.00619876
ISC/EB-prol	LOC5577915	LOC109427583	LOC5577915|AAEL003336	Up	0.288702	0.116063	0.0189962
ISC/EB-prol	LOC5574515	LOC109401458	LOC5574515|AAEL019717	Up	0.286746	0.0235885	2.37105e-05
ISC/EB-prol	LOC5569466	LOC109415565	LOC5569466|AAEL007662	Up	0.285947	0.0645741	0.000720048
ISC/EB-prol	LOC5570994	LOC115257884	LOC5570994|AAEL008740	Up	0.285006	0.0920319	0.00239952
ISC/EB-prol	LOC5575934	LOC109423817	LOC5575934|AAEL009677	Up	0.284693	0.11739	0.0193961
ISC/EB-prol	LOC5566357	LOC109411282	LOC5566357|AAEL005339	Up	0.284613	0.113668	0.0141972
ISC/EB-prol	LOC5576631	LOC109409093	LOC5576631|AAEL019597	Up	0.282972	0.113109	0.0131974
ISC/EB-prol	LOC5574844	LOC109399154	LOC5574844|AAEL011447	Up	0.282302	0.0141255	0.000192396
ISC/EB-prol	LOC5575995	LOC109431900	LOC5575995|AAEL002761	Up	0.280581	0.0533379	0.000259423
ISC/EB-prol	LOC5577591	LOC109405220	LOC5577591|AAEL020476	Up	0.279266	0.0775082	0.00242214
ISC/EB-prol	LOC5570959	LOC115258462	LOC5570959|AAEL008696	Up	0.277451	0.104624	0.00879824
ISC/EB-prol	LOC5567091	LOC109406022	LOC5567091|AAEL012313	Up	0.272824	0.0550708	0.000391584
ISC/EB-prol	LOC5573878	LOC109422588	LOC5573878|AAEL010799	Up	0.272685	0.118607	0.0277944
ISC/EB-prol	LOC5574214	LOC109408655	LOC5574214|AAEL024525	Up	0.271772	0.0759549	0.00167423
ISC/EB-prol	LOC5576054	LOC109412653	LOC5576054|AAEL013952	Up	0.270181	0.0618123	0.000432105
ISC/EB-prol	LOC5566596	LOC109420330	LOC5566596|AAEL000758	Up	0.267872	0.066206	0.000555489
ISC/EB-prol	LOC5578966	LOC109622810	LOC5578966|AAEL013950	Up	0.266313	0.0953883	0.00919816
ISC/EB-prol	LOC23687867	LOC109413608	LOC23687867|AAEL017447	Up	0.265621	0.0551757	0.000368772
ISC/EB-prol	LOC5563827	LOC109427043	LOC5563827|AAEL014161	Up	0.261224	0.112114	0.024995
ISC/EB-prol	LOC5571955	LOC109405894	LOC5571955|AAEL026633	Up	0.260349	0.07912	0.00285702
ISC/EB-prol	LOC5572730	LOC134283994	LOC5572730|AAEL010004	Up	0.259433	0.122236	0.0385923
ISC/EB-prol	LOC5578522	LOC115257375	LOC5578522|AAEL013731	Up	0.258522	0.114133	0.0305939
ISC/EB-prol	LOC5577034	LOC109428755	LOC5577034|AAEL012944	Up	0.258511	0.0142669	0.000200271
ISC/EB-prol	LOC5571696	LOC115253635	LOC5571696|AAEL009220	Up	0.258386	0.128096	0.044791
ISC/EB-prol	LOC5573952	LOC109621858	LOC5573952|AAEL002225	Up	0.255658	0.111712	0.0191962
ISC/EB-prol	LOC5566824	LOC109423129	LOC5566824|AAEL022609	Up	0.255115	0.046614	0.00013276
ISC/EB-prol	LOC5572466	LOC115255020	LOC5572466|AAEL001832	Up	0.252359	0.120094	0.0337932
ISC/EB-prol	LOC110675613	LOC109419661	LOC110675613|AAEL021473	Up	0.252306	0.118598	0.0457908
ISC/EB-prol	LOC5567360	LOC109421945	LOC5567360|AAEL020113	Up	0.251422	0.119813	0.0375925
ISC/EB-prol	LOC5571932	LOC109405279	LOC5571932|AAEL009387	Up	0.250985	0.0682212	0.00100375
ISC/EB-prol	LOC5573574	LOC109429115	LOC5573574|AAEL002118	Up	0.249189	0.0629259	0.00108186
ISC/EB-prol	LOC5575182	LOC109414139	LOC5575182|AAEL019826	Up	0.248189	0.0849333	0.00419916
ISC/EB-prol	LOC5572843	LOC109425462	LOC5572843|AAEL010059	Up	0.24632	0.0450654	0.000291376
ISC/EB-prol	LOC5572090	LOC109399102	LOC5572090|AAEL009496	Up	0.24549	0.0162939	0.000230757
ISC/EB-prol	LOC5568090	LOC109416572	LOC5568090|AAEL006511	Up	0.244661	0.0140291	0.000171685
ISC/EB-prol	LOC5565563	LOC115253479	LOC5565563|AAEL004832	Up	0.242185	0.0929273	0.00859828
ISC/EB-prol	LOC5565229	LOC109420360	LOC5565229|AAEL004675	Up	0.241597	0.113146	0.0305939
ISC/EB-prol	LOC5565541	LOC109413483	LOC5565541|AAEL004829	Up	0.241437	0.0509722	0.000508489
ISC/EB-prol	LOC5575032	LOC109411288	LOC5575032|AAEL011584	Up	0.236694	0.0729775	0.00297719
ISC/EB-prol	LOC5572365	LOC109431049	LOC5572365|AAEL009747	Up	0.236612	0.0156419	0.000149606
ISC/EB-prol	LOC5577139	LOC109420869	LOC5577139|AAEL003125	Up	0.236397	0.0904485	0.0121976
ISC/EB-prol	LOC5577566	LOC109622780	LOC5577566|AAEL013272	Up	0.233711	0.01515	0.000170784
ISC/EB-prol	LOC5574270	LOC115270450	LOC5574270|AAEL011038	Up	0.233463	0.0857673	0.00719856
ISC/EB-prol	LOC5564525	LOC109429796	LOC5564525|AAEL014492	Up	0.230667	0.105658	0.0319936
ISC/EB-prol	LOC5570244	LOC109405852	LOC5570244|AAEL008188	Up	0.223562	0.0138271	0.000184051
ISC/EB-prol	LOC5578918	LOC109403851	LOC5578918|AAEL003758	Up	0.223524	0.0822004	0.0079984
ISC/EB-prol	LOC5571571	LOC109403563	LOC5571571|AAEL009160	Up	0.223511	0.0394271	3.85493e-05
ISC/EB-prol	LOC5565301	LOC109419754	LOC5565301|AAEL004715	Up	0.218148	0.0694015	0.00410604
ISC/EB-prol	LOC5578313	LOC109420976	LOC5578313|AAEL013625	Up	0.215958	0.0156371	0.000317934
ISC/EB-prol	LOC5567341	LOC109411771	LOC5567341|AAEL006011	Up	0.215301	0.040867	0.000162125
ISC/EB-prol	LOC5565979	LOC109413884	LOC5565979|AAEL005097	Up	0.215253	0.0156	0.000205843
ISC/EB-prol	LOC5566373	LOC115261548	LOC5566373|AAEL005353	Up	0.212979	0.100087	0.034793
ISC/EB-prol	LOC5567454	LOC115258944	LOC5567454|AAEL000944	Up	0.211086	0.0888754	0.0187962
ISC/EB-prol	LOC5569520	LOC109411704	LOC5569520|AAEL007707	Up	0.209226	0.0490025	0.000985158
ISC/EB-prol	LOC23687501	LOC109428447	LOC23687501|AAEL017081	Up	0.207845	0.0586396	0.00186856
ISC/EB-prol	LOC5576245	LOC109422250	LOC5576245|AAEL002848	Up	0.205816	0.0816164	0.0135973
ISC/EB-prol	LOC5570877	LOC109429210	LOC5570877|AAEL008656	Up	0.205733	0.0992842	0.0493901
ISC/EB-prol	LOC5576642	LOC115253756	LOC5576642|AAEL012671	Up	0.204561	0.0410734	0.000127012
ISC/EB-prol	LOC5563786	LOC109428105	LOC5563786|AAEL003942	Up	0.202948	0.014715	0.000264816
ISC/EB-prol	LOC5564212	LOC109621247	LOC5564212|AAEL004151	Up	0.202586	0.0153415	0.00017748
ISC/EB-prol	LOC5573060	LOC109413132	LOC5573060|AAEL010244	Up	0.198568	0.0796494	0.0169966
ISC/EB-prol	LOC5564185	LOC109413806	LOC5564185|AAEL014335	Up	0.197866	0.0694654	0.00719856
ISC/EB-prol	LOC5579227	LOC109404799	LOC5579227|AAEL014064	Up	0.197692	0.0405971	0.000726397
ISC/EB-prol	LOC5569531	LOC109403451	LOC5569531|AAEL007715	Up	0.196511	0.014447	0.000258459
ISC/EB-prol	LOC5572791	LOC109427854	LOC5572791|AAEL001896	Up	0.195892	0.0634452	0.00279944
ISC/EB-prol	LOC5579032	LOC109423344	LOC5579032|AAEL013969	Up	0.192415	0.0861114	0.024995
ISC/EB-prol	LOC5569604	LOC109416078	LOC5569604|AAEL001275	Up	0.192306	0.0687176	0.0069986
ISC/EB-prol	LOC23687936	LOC109418991	LOC23687936|AAEL017516	Up	0.188687	0.0154212	0.000447258
ISC/EB-prol	LOC5568611	LOC109430169	LOC5568611|AAEL006976	Up	0.188316	0.0715426	0.00939812
ISC/EB-prol	LOC5570501	LOC109418106	LOC5570501|AAEL001394	Up	0.188014	0.0819081	0.0295941
ISC/EB-prol	LOC5564916	LOC109428409	LOC5564916|AAEL014657	Up	0.186842	0.0801611	0.0243951
ISC/EB-prol	LOC5580030	LOC109412987	LOC5580030|AAEL009653	Up	0.184771	0.0146611	0.00019121
ISC/EB-prol	LOC5563904	LOC109402267	LOC5563904|AAEL003993	Up	0.184167	0.0729764	0.014797
ISC/EB-prol	LOC5576215	LOC109422297	LOC5576215|AAEL002832	Up	0.180717	0.0130067	0.000302699
ISC/EB-prol	LOC5567839	LOC109415611	LOC5567839|AAEL001005	Up	0.176024	0.0450171	0.00115552
ISC/EB-prol	LOC5574526	LOC115253654	LOC5574526|AAEL011197	Up	0.175381	0.0265933	6.68401e-05
ISC/EB-prol	LOC5571506	LOC109427701	LOC5571506|AAEL019988	Up	0.173394	0.0519552	0.0019231
ISC/EB-prol	LOC5566843	LOC109622065	LOC5566843|AAEL000823	Up	0.172703	0.0140011	0.000186665
ISC/EB-prol	LOC5576966	LOC109420035	LOC5576966|AAEL003060	Up	0.162258	0.0523796	0.00341314
ISC/EB-prol	LOC5566520	LOC109429374	LOC5566520|AAEL005457	Up	0.162056	0.0794373	0.0421916
ISC/EB-prol	LOC5574866	LOC109424016	LOC5574866|AAEL011471	Up	0.161962	0.0136001	0.000391605
ISC/EB-prol	LOC5567070	LOC109410072	LOC5567070|AAEL005817	Up	0.161369	0.0143584	6.44338e-06
ISC/EB-prol	LOC5579108	LOC109399101	LOC5579108|AAEL003844	Up	0.160461	0.0462333	0.00176035
ISC/EB-prol	LOC5567848	LOC109418058	LOC5567848|AAEL000987	Up	0.160095	0.0140644	0.000101882
ISC/EB-prol	LOC5572335	LOC115267045	LOC5572335|AAEL009719	Up	0.159464	0.0739469	0.0365927
ISC/EB-prol	LOC23687495	LOC109404332	LOC23687495|AAEL017075	Up	0.156254	0.0322536	0.000273524
ISC/EB-prol	LOC5573863	LOC109409303	LOC5573863|AAEL010765	Up	0.153272	0.0393688	0.000328783
ISC/EB-prol	LOC5578155	LOC109424394	LOC5578155|AAEL013533	Up	0.152203	0.0269745	0.000267869
ISC/EB-prol	LOC5578796	LOC109404395	LOC5578796|AAEL003675	Up	0.146474	0.0400874	0.00161378
ISC/EB-prol	LOC5574338	LOC109398039	LOC5574338|AAEL002334	Up	0.145574	0.0367743	0.00131934
ISC/EB-prol	LOC5568166	LOC109398308	LOC5568166|AAEL006609	Up	0.144484	0.069363	0.0471906
ISC/EB-prol	LOC5564581	LOC109426436	LOC5564581|AAEL004347	Up	0.143378	0.0680313	0.0409918
ISC/EB-prol	LOC5580070	LOC109402212	LOC5580070|AAEL002160	Up	0.134467	0.0464183	0.00679864
ISC/EB-prol	LOC23687618	LOC109431357	LOC23687618|AAEL017198	Up	0.134254	0.012909	0.000234055
ISC/EB-prol	LOC5570233	LOC109426322	LOC5570233|AAEL008166	Up	0.132682	0.049196	0.00919816
ISC/EB-prol	LOC5570139	LOC134284018	LOC5570139|AAEL008103	Up	0.130864	0.0144706	0.000427831
ISC/EB-prol	LOC5577719	LOC109428240	LOC5577719|AAEL013353	Up	0.130255	0.0290145	0.00106385
ISC/EB-prol	LOC5578900	LOC109426815	LOC5578900|AAEL013904	Up	0.129572	0.0582585	0.0271946
ISC/EB-prol	LOC5578684	LOC109430324	LOC5578684|AAEL003645	Up	0.120918	0.0354098	0.00471704
ISC/EB-prol	LOC5571226	LOC109422051	LOC5571226|AAEL008921	Up	0.117657	0.0356745	0.00279944
ISC/EB-prol	LOC5571500	LOC109431390	LOC5571500|AAEL001623	Up	0.115226	0.0392153	0.00479904
ISC/EB-prol	LOC5569144	LOC109407537	LOC5569144|AAEL007392	Up	0.108718	0.0538596	0.0389922
ISC/EB-prol	LOC5572347	LOC109409984	LOC5572347|AAEL009733	Up	0.106376	0.0460172	0.0225955
ISC/EB-prol	LOC5563590	LOC109400853	LOC5563590|AAEL000032	Up	0.101785	0.0163709	0.00131332
ISC/EB-prol	LOC5574167	LOC115261492	LOC5574167|AAEL010977	Up	0.0932975	0.0253813	0.0019407
ISC/EB-prol	LOC5570243	LOC109405848	LOC5570243|AAEL008192	Up	0.0911478	0.0162227	0.000100072
ISC/EB-prol	LOC5573872	LOC115263730	LOC5573872|AAEL010787	Up	0.0905911	0.0226397	0.00110373
ISC/EB-prol	LOC110675493	LOC109419974	LOC110675493|AAEL028043	Up	0.0775496	0.0146198	0.00140871
ISC/EB-prol	LOC5570675	LOC109408924	LOC5570675|AAEL008481	Up	0.0745718	0.0138659	0.00107859
ISC/EB-prol	LOC5576653	LOC109428069	LOC5576653|AAEL012686	Up	0.0535085	0.0142568	0.000768816
ISC/EB-prol	LOC5577723	LOC115266377	LOC5577723|AAEL013359	Up	0.0481755	0.0175751	0.00759848
ISC/EB-prol	LOC5564713	LOC109428462	LOC5564713|AAEL014583	Down	-0.031643	0.0136091	0.0153969
ISC/EB-prol	LOC5573413	LOC109401923	LOC5573413|AAEL002047	Down	-0.0338728	0.0141571	0.0109978
ISC/EB-prol	LOC5575105	LOC109418249	LOC5575105|AAEL011656	Down	-0.034813	0.0142838	0.0119976
ISC/EB-prol	LOC5576758	LOC109416823	LOC5576758|AAEL025553	Down	-0.0512699	0.0147869	0.00337734
ISC/EB-prol	LOC5574485	LOC109409318	LOC5574485|AAEL002372	Down	-0.0551559	0.0143538	0.00139353
ISC/EB-prol	LOC23687404	LOC109413713	LOC23687404|AAEL016984	Down	-0.0618296	0.0314801	0.0377924
ISC/EB-prol	LOC5575273	LOC109407899	LOC5575273|AAEL011742	Down	-0.0785088	0.0371678	0.0283943
ISC/EB-prol	LOC5579810	LOC109431093	LOC5579810|AAEL005515	Down	-0.108366	0.0268684	0.000594354
ISC/EB-prol	LOC5574404	LOC109419212	LOC5574404|AAEL011116	Down	-0.131242	0.032321	0.000561642
ISC/EB-prol	LOC5567491	LOC109622181	LOC5567491|AAEL000951	Down	-0.135338	0.0199974	0.000773982
ISC/EB-prol	LOC5570318	LOC115253927	LOC5570318|AAEL008257	Down	-0.142283	0.0404811	0.00171667
ISC/EB-prol	LOC5569076	LOC109421659	LOC5569076|AAEL001216	Down	-0.147817	0.0527254	0.00459908
ISC/EB-prol	LOC5575640	LOC109405471	LOC5575640|AAEL011972	Down	-0.151401	0.0775263	0.0445911
ISC/EB-prol	LOC5571466	LOC109408401	LOC5571466|AAEL009101	Down	-0.153843	0.0341232	0.000639019
ISC/EB-prol	LOC5564179	LOC115254042	LOC5564179|AAEL004141	Down	-0.155957	0.0688302	0.024795
ISC/EB-prol	LOC5580074	LOC109414087	LOC5580074|AAEL002178	Down	-0.159057	0.0684584	0.0153969
ISC/EB-prol	LOC5580325	LOC109420084	LOC5580325|AAEL013068	Down	-0.159179	0.0404756	0.000782716
ISC/EB-prol	LOC5564781	LOC109424554	LOC5564781|AAEL004419	Down	-0.166803	0.0654017	0.0103979
ISC/EB-prol	LOC5565441	LOC109426026	LOC5565441|AAEL000641	Down	-0.166826	0.0428272	0.00119485
ISC/EB-prol	LOC5574731	LOC109404650	LOC5574731|AAEL011371	Down	-0.174674	0.051002	0.00186468
ISC/EB-prol	LOC5578022	LOC109399713	LOC5578022|AAEL003373	Down	-0.177259	0.0839713	0.0355929
ISC/EB-prol	LOC5578495	LOC115256846	LOC5578495|AAEL002335	Down	-0.178123	0.0769697	0.015197
ISC/EB-prol	LOC5571080	LOC109419385	LOC5571080|AAEL008787	Down	-0.180235	0.0586797	0.00339932
ISC/EB-prol	LOC5572464	LOC109419734	LOC5572464|AAEL001795	Down	-0.184971	0.0939856	0.0461908
ISC/EB-prol	LOC5568141	LOC109425692	LOC5568141|AAEL006582	Down	-0.187439	0.0790011	0.0157968
ISC/EB-prol	LOC5567722	LOC109422822	LOC5567722|AAEL021386	Down	-0.190694	0.0933245	0.0353929
ISC/EB-prol	LOC5565701	LOC109411963	LOC5565701|AAEL014944	Down	-0.190703	0.0314284	4.55209e-05
ISC/EB-prol	LOC5567821	LOC109418419	LOC5567821|AAEL000986	Down	-0.195148	0.0536793	0.00121214
ISC/EB-prol	LOC23687923	LOC109405451	LOC23687923|AAEL017503	Down	-0.19705	0.0992341	0.0409918
ISC/EB-prol	LOC5568708	LOC115262587	LOC5568708|AAEL007054	Down	-0.197136	0.0579889	0.0022732
ISC/EB-prol	LOC5573494	LOC109622837	LOC5573494|AAEL027554	Down	-0.198637	0.0934683	0.0327934
ISC/EB-prol	LOC5576345	LOC109623098	LOC5576345|AAEL002866	Down	-0.201234	0.0718112	0.00719856
ISC/EB-prol	LOC5568633	LOC109428196	LOC5568633|AAEL007023	Down	-0.201999	0.0463283	0.000524746
ISC/EB-prol	LOC5570462	LOC109418021	LOC5570462|AAEL022661	Down	-0.202987	0.101736	0.034993
ISC/EB-prol	LOC5570335	LOC115270301	LOC5570335|AAEL019669	Down	-0.203408	0.0277642	4.13436e-05
ISC/EB-prol	LOC5569745	LOC109410645	LOC5569745|AAEL007883	Down	-0.203673	0.0348872	0.000982968
ISC/EB-prol	LOC5567559	LOC109413799	LOC5567559|AAEL006158	Down	-0.203708	0.0319793	6.60886e-05
ISC/EB-prol	LOC5566610	LOC109418842	LOC5566610|AAEL027504	Down	-0.210166	0.0914987	0.0189962
ISC/EB-prol	LOC5566977	LOC109621383	LOC5566977|AAEL005739	Down	-0.210256	0.0519419	0.000351703
ISC/EB-prol	LOC5579902	LOC109410392	LOC5579902|AAEL001044	Down	-0.210388	0.065622	0.00355369
ISC/EB-prol	LOC5580331	LOC109420081	LOC5580331|AAEL013074	Down	-0.210552	0.0464763	0.000569555
ISC/EB-prol	LOC5564487	LOC109425135	LOC5564487|AAEL004288	Down	-0.211595	0.0677968	0.00343929
ISC/EB-prol	LOC5575828	LOC109402168	LOC5575828|AAEL012095	Down	-0.212798	0.0842188	0.0125975
ISC/EB-prol	LOC5575696	LOC134291611	LOC5575696|AAEL012010	Down	-0.214237	0.0546115	0.00127586
ISC/EB-prol	LOC23687579	LOC109420687	LOC23687579|AAEL019825	Down	-0.214818	0.0914638	0.0185963
ISC/EB-prol	LOC110679583	LOC115256000	LOC110679583|AAEL023591	Down	-0.215631	0.0542266	0.000763329
ISC/EB-prol	LOC5567464	LOC109403358	LOC5567464|AAEL000930	Down	-0.215799	0.0956189	0.0225955
ISC/EB-prol	LOC5574496	LOC109419113	LOC5574496|AAEL002399	Down	-0.219808	0.0718191	0.00259948
ISC/EB-prol	LOC5579027	LOC109426266	LOC5579027|AAEL013966	Down	-0.219909	0.109469	0.0419916
ISC/EB-prol	LOC5573778	LOC109416473	LOC5573778|AAEL000293	Down	-0.22039	0.105461	0.039992
ISC/EB-prol	LOC5565337	LOC109408825	LOC5565337|AAEL014831	Down	-0.221798	0.0935611	0.0171966
ISC/EB-prol	LOC5566055	LOC109399622	LOC5566055|AAEL005150	Down	-0.223408	0.108719	0.0331934
ISC/EB-prol	LOC5568014	LOC109399358	LOC5568014|AAEL006460	Down	-0.224813	0.0943368	0.0175965
ISC/EB-prol	LOC5572532	LOC109431669	LOC5572532|AAEL009863	Down	-0.225608	0.0778403	0.00359928
ISC/EB-prol	LOC110674163	LOC109402435	LOC110674163|AAEL022901	Down	-0.227134	0.0981622	0.0195961
ISC/EB-prol	LOC5571685	LOC109418122	LOC5571685|AAEL009214	Down	-0.22763	0.0678161	0.0021248
ISC/EB-prol	LOC5564563	LOC109398004	LOC5564563|AAEL014510	Down	-0.228666	0.0871395	0.00839832
ISC/EB-prol	LOC5573260	LOC109431574	LOC5573260|AAEL010359	Down	-0.229173	0.0693071	0.00231221
ISC/EB-prol	LOC5568659	LOC109398795	LOC5568659|AAEL007019	Down	-0.229423	0.0391376	0.000191964
ISC/EB-prol	LOC5569899	LOC109429026	LOC5569899|AAEL007990	Down	-0.230462	0.0712306	0.00595653
ISC/EB-prol	LOC5580010	LOC109411856	LOC5580010|AAEL009637	Down	-0.231834	0.0466967	6.96978e-05
ISC/EB-prol	LOC5566309	LOC109412776	LOC5566309|AAEL005308	Down	-0.232362	0.107369	0.0243951
ISC/EB-prol	LOC5574000	LOC109403240	LOC5574000|AAEL010844	Down	-0.233746	0.120979	0.0411918
ISC/EB-prol	LOC5576477	LOC134285148	LOC5576477|AAEL002887	Down	-0.23574	0.0675394	0.0017436
ISC/EB-prol	LOC5571789	LOC109405114	LOC5571789|AAEL009317	Down	-0.23938	0.0493599	0.00049481
ISC/EB-prol	LOC5565556	LOC109410785	LOC5565556|AAEL004835	Down	-0.240283	0.086373	0.0059988
ISC/EB-prol	LOC5566301	LOC109397421	LOC5566301|AAEL005293	Down	-0.240986	0.0576126	0.00262411
ISC/EB-prol	LOC5580330	LOC109420082	LOC5580330|AAEL013071	Down	-0.241444	0.0733292	0.0022253
ISC/EB-prol	LOC5574564	LOC109404267	LOC5574564|AAEL011240	Down	-0.242331	0.107338	0.0207958
ISC/EB-prol	LOC5576552	LOC109400667	LOC5576552|AAEL012610	Down	-0.243422	0.0900856	0.00579884
ISC/EB-prol	LOC5571444	LOC109409715	LOC5571444|AAEL009080	Down	-0.243439	0.0823593	0.00379924
ISC/EB-prol	LOC5572836	LOC109425452	LOC5572836|AAEL010065	Down	-0.243735	0.0687703	0.00166716
ISC/EB-prol	LOC5564976	LOC109397530	LOC5564976|AAEL004532	Down	-0.243737	0.0992883	0.0129974
ISC/EB-prol	LOC5569632	LOC109401059	LOC5569632|AAEL007777	Down	-0.245459	0.0604618	0.000722782
ISC/EB-prol	LOC5575372	LOC109414184	LOC5575372|AAEL011776	Down	-0.247103	0.082043	0.00359928
ISC/EB-prol	LOC5566119	LOC109409682	LOC5566119|AAEL022497	Down	-0.248933	0.0969944	0.0089982
ISC/EB-prol	LOC5576440	LOC109421033	LOC5576440|AAEL005536	Down	-0.251041	0.058428	0.000866956
ISC/EB-prol	LOC5564308	LOC109403784	LOC5564308|AAEL000594	Down	-0.255817	0.121613	0.0371926
ISC/EB-prol	LOC5578368	LOC109407908	LOC5578368|AAEL003530	Down	-0.257277	0.0138808	4.7968e-06
ISC/EB-prol	LOC5563882	LOC109623344	LOC5563882|AAEL014204	Down	-0.257503	0.0680016	0.000979563
ISC/EB-prol	LOC5570277	LOC109409731	LOC5570277|AAEL008195	Down	-0.25767	0.109355	0.0165967
ISC/EB-prol	LOC5576266	LOC109430464	LOC5576266|AAEL012419	Down	-0.258217	0.0803944	0.00316817
ISC/EB-prol	LOC5570147	LOC109423425	LOC5570147|AAEL008128	Down	-0.258836	0.0598315	0.000587023
ISC/EB-prol	LOC5563664	LOC109412580	LOC5563664|AAEL000084	Down	-0.259435	0.0807477	0.00238798
ISC/EB-prol	LOC110678050	LOC109415718	LOC110678050|AAEL011968	Down	-0.259576	0.106568	0.014997
ISC/EB-prol	LOC5573395	LOC109417751	LOC5573395|AAEL002068	Down	-0.261424	0.117143	0.025195
ISC/EB-prol	LOC110674164	LOC109402430	LOC110674164|AAEL011982	Down	-0.263451	0.0906571	0.00479904
ISC/EB-prol	LOC5568570	LOC115262210	LOC5568570|AAEL001141	Down	-0.2646	0.0965547	0.00759848
ISC/EB-prol	LOC5568743	LOC109403193	LOC5568743|AAEL007092	Down	-0.264732	0.0766148	0.00295887
ISC/EB-prol	LOC5567152	LOC109429175	LOC5567152|AAEL005903	Down	-0.265677	0.132146	0.0439912
ISC/EB-prol	LOC5567494	LOC109622277	LOC5567494|AAEL000941	Down	-0.268138	0.057008	0.000404323
ISC/EB-prol	LOC5568784	LOC109415663	LOC5568784|AAEL007135	Down	-0.268615	0.0415554	0.000147479
ISC/EB-prol	LOC5576408	LOC109418833	LOC5576408|AAEL012502	Down	-0.269871	0.112742	0.015197
ISC/EB-prol	LOC5569174	LOC109425709	LOC5569174|AAEL007414	Down	-0.272309	0.0970689	0.0059988
ISC/EB-prol	LOC5563659	LOC109416751	LOC5563659|AAEL000004	Down	-0.272409	0.103157	0.00759848
ISC/EB-prol	LOC5577489	LOC109418556	LOC5577489|AAEL013229	Down	-0.272676	0.0397948	9.291e-05
ISC/EB-prol	LOC5573266	LOC109622239	LOC5573266|AAEL019802	Down	-0.272773	0.0764907	0.00200694
ISC/EB-prol	LOC5577687	LOC109426190	LOC5577687|AAEL013320	Down	-0.27297	0.102553	0.00819836
ISC/EB-prol	LOC5564319	LOC109421752	LOC5564319|AAEL000574	Down	-0.274183	0.0932031	0.00339932
ISC/EB-prol	LOC5570511	LOC109418079	LOC5570511|AAEL001412	Down	-0.278783	0.114304	0.0125975
ISC/EB-prol	LOC5573372	LOC109430713	LOC5573372|AAEL010467	Down	-0.279758	0.0504671	9.58368e-05
ISC/EB-prol	LOC5568951	LOC134284747	LOC5568951|AAEL007261	Down	-0.280232	0.11644	0.0171966
ISC/EB-prol	LOC5578986	LOC109430726	LOC5578986|AAEL003785	Down	-0.280414	0.138855	0.0403919
ISC/EB-prol	LOC5566232	LOC109420223	LOC5566232|AAEL005262	Down	-0.280839	0.0938086	0.00319556
ISC/EB-prol	LOC5564604	LOC109399052	LOC5564604|AAEL014529	Down	-0.281769	0.108208	0.0119976
ISC/EB-prol	LOC5569696	LOC109429878	LOC5569696|AAEL007842	Down	-0.281939	0.13694	0.0445911
ISC/EB-prol	LOC5570553	LOC109419262	LOC5570553|AAEL008374	Down	-0.284896	0.129128	0.0239952
ISC/EB-prol	LOC5579795	LOC109422355	LOC5579795|AAEL003957	Down	-0.286078	0.0275984	2.3442e-05
ISC/EB-prol	LOC5568680	LOC109425098	LOC5568680|AAEL007029	Down	-0.28678	0.0880076	0.00155772
ISC/EB-prol	LOC5572673	LOC115255015	LOC5572673|AAEL009948	Down	-0.288817	0.134505	0.0329934
ISC/EB-prol	LOC23687777	LOC109429511	LOC23687777|AAEL017357	Down	-0.290034	0.125763	0.0213957
ISC/EB-prol	LOC5564296	LOC109425687	LOC5564296|AAEL014393	Down	-0.290904	0.068967	0.00074853
ISC/EB-prol	LOC5576927	LOC109405258	LOC5576927|AAEL019449	Down	-0.29228	0.105713	0.00579884
ISC/EB-prol	LOC5572968	LOC109412318	LOC5572968|AAEL010168	Down	-0.292459	0.0153276	0.000216941
ISC/EB-prol	LOC5564792	LOC109411982	LOC5564792|AAEL004445	Down	-0.293975	0.0729327	0.00087032
ISC/EB-prol	LOC5567097	LOC109433624	LOC5567097|AAEL005839	Down	-0.294289	0.0589447	0.000447794
ISC/EB-prol	LOC5570007	LOC134291439	LOC5570007|AAEL000175	Down	-0.294627	0.0443177	0.000918653
ISC/EB-prol	LOC5566480	LOC109398221	LOC5566480|AAEL005405	Down	-0.294945	0.134998	0.0225955
ISC/EB-prol	LOC5574816	LOC109409852	LOC5574816|AAEL002464	Down	-0.295385	0.0529071	0.00027713
ISC/EB-prol	LOC5576326	LOC109407641	LOC5576326|AAEL000386	Down	-0.296793	0.122934	0.0173965
ISC/EB-prol	LOC5576672	LOC109417573	LOC5576672|AAEL012702	Down	-0.297534	0.111381	0.00839832
ISC/EB-prol	LOC5567501	LOC109621796	LOC5567501|AAEL006115	Down	-0.297821	0.037808	0.000480667
ISC/EB-prol	LOC5573265	LOC109431580	LOC5573265|AAEL010360	Down	-0.299183	0.100729	0.0029994
ISC/EB-prol	LOC5574592	LOC109432145	LOC5574592|AAEL002411	Down	-0.300036	0.0413037	0.000190964
ISC/EB-prol	LOC5574060	LOC109407955	LOC5574060|AAEL010906	Down	-0.30006	0.143603	0.0359928
ISC/EB-prol	LOC5572049	LOC109398173	LOC5572049|AAEL000245	Down	-0.300609	0.0721429	0.00228845
ISC/EB-prol	LOC23687841	LOC109419547	LOC23687841|AAEL017421	Down	-0.300655	0.0661725	0.000294088
ISC/EB-prol	LOC5571803	LOC109427544	LOC5571803|AAEL009330	Down	-0.303009	0.0853774	0.00401849
ISC/EB-prol	LOC5570616	LOC109417765	LOC5570616|AAEL008434	Down	-0.305767	0.0621102	0.000267039
ISC/EB-prol	LOC5569219	LOC115259649	LOC5569219|AAEL007484	Down	-0.310802	0.0998715	0.00239952
ISC/EB-prol	LOC5576587	LOC109405086	LOC5576587|AAEL002933	Down	-0.311076	0.0759953	0.00111272
ISC/EB-prol	LOC5566936	LOC109433363	LOC5566936|AAEL005699	Down	-0.311178	0.076084	0.000639957
ISC/EB-prol	LOC5574953	LOC109412053	LOC5574953|AAEL011551	Down	-0.311525	0.104379	0.0029994
ISC/EB-prol	LOC5567528	LOC109413668	LOC5567528|AAEL006129	Down	-0.313431	0.0607021	0.000327561
ISC/EB-prol	LOC5575718	LOC109431782	LOC5575718|AAEL012035	Down	-0.31475	0.0405514	7.73507e-05
ISC/EB-prol	LOC5564860	LOC109409570	LOC5564860|AAEL004472	Down	-0.316717	0.0536787	0.000123272
ISC/EB-prol	LOC5572265	LOC115267498	LOC5572265|AAEL001769	Down	-0.317344	0.0866453	0.00176189
ISC/EB-prol	LOC5568302	LOC109410522	LOC5568302|AAEL006741	Down	-0.319403	0.0392622	7.63732e-05
ISC/EB-prol	LOC5580031	LOC109412985	LOC5580031|AAEL009647	Down	-0.319635	0.119861	0.0079984
ISC/EB-prol	LOC5576837	LOC134289788	LOC5576837|AAEL012816	Down	-0.319837	0.111486	0.00319936
ISC/EB-prol	LOC5576745	LOC109409745	LOC5576745|AAEL012731	Down	-0.319894	0.0651093	0.00195913
ISC/EB-prol	LOC5563919	LOC109407396	LOC5563919|AAEL001277	Down	-0.321372	0.10722	0.00279944
ISC/EB-prol	LOC5568618	LOC109430154	LOC5568618|AAEL006977	Down	-0.322734	0.0611712	0.000208771
ISC/EB-prol	LOC5573821	LOC109404803	LOC5573821|AAEL010743	Down	-0.324387	0.0863979	0.00103308
ISC/EB-prol	LOC5577893	LOC109430890	LOC5577893|AAEL013407	Down	-0.32672	0.056149	0.000312963
ISC/EB-prol	LOC5564532	LOC109401844	LOC5564532|AAEL014501	Down	-0.327377	0.119298	0.00679864
ISC/EB-prol	LOC5569581	LOC109408889	LOC5569581|AAEL007763	Down	-0.328821	0.122125	0.00559888
ISC/EB-prol	LOC5568303	LOC109426579	LOC5568303|AAEL006751	Down	-0.329307	0.0370604	0.000501576
ISC/EB-prol	LOC5576914	LOC115259545	LOC5576914|AAEL012865	Down	-0.329451	0.0688499	0.000223066
ISC/EB-prol	LOC5570951	LOC109411446	LOC5570951|AAEL008674	Down	-0.329722	0.0766958	0.000585562
ISC/EB-prol	LOC5565372	LOC134287869	LOC5565372|AAEL004755	Down	-0.329767	0.0925083	0.000926805
ISC/EB-prol	LOC5571006	LOC109413090	LOC5571006|AAEL008738	Down	-0.330319	0.044864	8.23043e-05
ISC/EB-prol	LOC5564012	LOC109402079	LOC5564012|AAEL014275	Down	-0.332879	0.115768	0.00679864
ISC/EB-prol	LOC5578360	LOC109412019	LOC5578360|AAEL024675	Down	-0.333593	0.115034	0.00359928
ISC/EB-prol	LOC5580100	LOC109416831	LOC5580100|AAEL002140	Down	-0.333656	0.0702898	0.000330301
ISC/EB-prol	LOC5569340	LOC109407254	LOC5569340|AAEL007548	Down	-0.334476	0.0903063	0.000969847
ISC/EB-prol	LOC5573879	LOC109422594	LOC5573879|AAEL010801	Down	-0.338819	0.0342007	0.000237102
ISC/EB-prol	LOC5572563	LOC109405024	LOC5572563|AAEL009879	Down	-0.341657	0.135176	0.0115977
ISC/EB-prol	LOC5569234	LOC109417800	LOC5569234|AAEL024337	Down	-0.34253	0.135885	0.0111978
ISC/EB-prol	LOC110674760	LOC109405106	LOC110674760|AAEL021736	Down	-0.345187	0.0951613	0.00108191
ISC/EB-prol	LOC5568211	LOC109422743	LOC5568211|AAEL006642	Down	-0.345307	0.0326447	7.48785e-06
ISC/EB-prol	LOC5579854	LOC109399059	LOC5579854|AAEL005856	Down	-0.34845	0.12272	0.00359928
ISC/EB-prol	LOC5573375	LOC109429762	LOC5573375|AAEL010473	Down	-0.34916	0.136922	0.0105979
ISC/EB-prol	LOC5568944	LOC109421521	LOC5568944|AAEL007243	Down	-0.349935	0.096847	0.000904885
ISC/EB-prol	LOC5568880	LOC109406369	LOC5568880|AAEL007184	Down	-0.351082	0.065581	0.000223229
ISC/EB-prol	LOC5569864	LOC109418015	LOC5569864|AAEL007944	Down	-0.352041	0.093305	0.000894237
ISC/EB-prol	LOC5578974	LOC109417794	LOC5578974|AAEL019746	Down	-0.352183	0.0813606	0.000668913
ISC/EB-prol	LOC5579259	LOC134285146	LOC5579259|AAEL015653	Down	-0.353951	0.139017	0.0121976
ISC/EB-prol	LOC5565942	LOC109414602	LOC5565942|AAEL019563	Down	-0.353968	0.106891	0.00214249
ISC/EB-prol	LOC5570792	LOC109424164	LOC5570792|AAEL008562	Down	-0.355762	0.101153	0.00189543
ISC/EB-prol	LOC5576069	LOC109420816	LOC5576069|AAEL026118	Down	-0.357096	0.0685606	0.000262643
ISC/EB-prol	LOC5570524	LOC109413170	LOC5570524|AAEL001422	Down	-0.358871	0.119088	0.00239952
ISC/EB-prol	LOC5576917	LOC109412743	LOC5576917|AAEL012860	Down	-0.360675	0.126625	0.00559888
ISC/EB-prol	LOC5570142	LOC134284228	LOC5570142|AAEL019814	Down	-0.361616	0.13283	0.00739852
ISC/EB-prol	LOC5574421	LOC109408788	LOC5574421|AAEL011136	Down	-0.362377	0.144644	0.0135973
ISC/EB-prol	LOC5569011	LOC109420077	LOC5569011|AAEL007291	Down	-0.362445	0.118231	0.00319936
ISC/EB-prol	LOC5577035	LOC109424535	LOC5577035|AAEL012943	Down	-0.363229	0.115851	0.00259948
ISC/EB-prol	LOC5568300	LOC109426576	LOC5568300|AAEL006725	Down	-0.365408	0.133461	0.00719856
ISC/EB-prol	LOC5577377	LOC115256322	LOC5577377|AAEL000428	Down	-0.367746	0.127464	0.00407139
ISC/EB-prol	LOC5565657	LOC109420244	LOC5565657|AAEL004914	Down	-0.371366	0.104719	0.00120574
ISC/EB-prol	LOC5568471	LOC109423328	LOC5568471|AAEL006885	Down	-0.37193	0.023773	1.53092e-06
ISC/EB-prol	LOC5565749	LOC109414881	LOC5565749|AAEL014960	Down	-0.372038	0.116908	0.00246166
ISC/EB-prol	LOC110678522	LOC115267924	LOC110678522|nan	Down	-0.372263	0.132562	0.0039992
ISC/EB-prol	LOC5570078	LOC109431761	LOC5570078|AAEL018214	Down	-0.373663	0.0985634	0.000416312
ISC/EB-prol	LOC5574109	LOC115263511	LOC5574109|AAEL002263	Down	-0.374098	0.0658462	7.07506e-05
ISC/EB-prol	LOC5564584	LOC109402150	LOC5564584|AAEL004338	Down	-0.375309	0.0894635	0.0024452
ISC/EB-prol	LOC23687928	LOC109423623	LOC23687928|AAEL017508	Down	-0.375387	0.129688	0.0029994
ISC/EB-prol	LOC5568178	LOC109398299	LOC5568178|AAEL019914	Down	-0.377588	0.105902	0.00123253
ISC/EB-prol	LOC5573302	LOC109430908	LOC5573302|AAEL022867	Down	-0.378885	0.0839208	0.000235255
ISC/EB-prol	LOC5574648	LOC115256333	LOC5574648|AAEL011288	Down	-0.378997	0.0215456	1.66173e-05
ISC/EB-prol	LOC5565143	LOC109404012	LOC5565143|AAEL004607	Down	-0.379988	0.135856	0.004999
ISC/EB-prol	LOC5567109	LOC109408930	LOC5567109|AAEL005832	Down	-0.380211	0.0854939	0.00044432
ISC/EB-prol	LOC5567075	LOC109432134	LOC5567075|AAEL005799	Down	-0.380266	0.112868	0.00197173
ISC/EB-prol	LOC5578149	LOC115258731	LOC5578149|AAEL013530	Down	-0.381495	0.115041	0.00186125
ISC/EB-prol	LOC5576658	LOC109418288	LOC5576658|AAEL012681	Down	-0.384089	0.0270123	1.96623e-05
ISC/EB-prol	LOC5573600	LOC109429151	LOC5573600|AAEL002119	Down	-0.386806	0.0873941	0.000504009
ISC/EB-prol	LOC5573231	LOC109407526	LOC5573231|AAEL010312	Down	-0.386991	0.129381	0.00359928
ISC/EB-prol	LOC5580157	LOC109406270	LOC5580157|AAEL011395	Down	-0.387366	0.11831	0.00298991
ISC/EB-prol	LOC5578686	LOC109430323	LOC5578686|AAEL003634	Down	-0.390693	0.0600947	0.00013004
ISC/EB-prol	LOC5573974	LOC109401487	LOC5573974|AAEL010821	Down	-0.393725	0.0146304	0.000127756
ISC/EB-prol	LOC5574902	LOC109426838	LOC5574902|AAEL011500	Down	-0.394586	0.125812	0.00235846
ISC/EB-prol	LOC5571785	LOC109410081	LOC5571785|AAEL009313	Down	-0.394906	0.0249145	3.46592e-06
ISC/EB-prol	LOC5573790	LOC109428891	LOC5573790|AAEL010716	Down	-0.39721	0.0671112	3.84636e-05
ISC/EB-prol	LOC5575914	LOC109423800	LOC5575914|AAEL012175	Down	-0.397275	0.0271705	2.14069e-06
ISC/EB-prol	LOC5578851	LOC115270170	LOC5578851|AAEL022689	Down	-0.399831	0.102209	0.00126469
ISC/EB-prol	LOC5564972	LOC109397524	LOC5564972|AAEL004523	Down	-0.402027	0.0731755	4.13142e-05
ISC/EB-prol	LOC5576201	LOC109402406	LOC5576201|AAEL012394	Down	-0.403412	0.110357	0.00140451
ISC/EB-prol	LOC5572167	LOC109400433	LOC5572167|AAEL023148	Down	-0.405559	0.11455	0.00108977
ISC/EB-prol	LOC5568658	LOC109398864	LOC5568658|AAEL007001	Down	-0.407566	0.0692536	0.00033035
ISC/EB-prol	LOC5571084	LOC109408437	LOC5571084|AAEL008789	Down	-0.40885	0.065131	7.25899e-05
ISC/EB-prol	LOC5564544	LOC115266987	LOC5564544|AAEL004319	Down	-0.413911	0.0779998	6.89561e-05
ISC/EB-prol	LOC5565440	LOC109426040	LOC5565440|AAEL000635	Down	-0.414688	0.112262	0.00161733
ISC/EB-prol	LOC5568342	LOC109415535	LOC5568342|AAEL001065	Down	-0.416502	0.129759	0.00307283
ISC/EB-prol	LOC5570958	LOC109406841	LOC5570958|AAEL008687	Down	-0.417478	0.0960111	0.000733228
ISC/EB-prol	LOC5577545	LOC109430176	LOC5577545|AAEL013249	Down	-0.419307	0.0981816	0.000633381
ISC/EB-prol	LOC5574704	LOC109417799	LOC5574704|AAEL011340	Down	-0.419697	0.0933309	0.000285286
ISC/EB-prol	LOC5571763	LOC109621276	LOC5571763|AAEL009287	Down	-0.424259	0.0398333	8.46589e-06
ISC/EB-prol	LOC5571230	LOC109401451	LOC5571230|AAEL019485	Down	-0.42735	0.131138	0.00248633
ISC/EB-prol	LOC5567327	LOC115264125	LOC5567327|AAEL005992	Down	-0.427635	0.120485	0.000882082
ISC/EB-prol	LOC5573710	LOC109399472	LOC5573710|AAEL019460	Down	-0.427679	0.0904837	0.000454618
ISC/EB-prol	LOC5564186	LOC109402620	LOC5564186|AAEL026297	Down	-0.427871	0.120292	0.00166001
ISC/EB-prol	LOC5570455	LOC109402076	LOC5570455|AAEL008341	Down	-0.430606	0.0565794	7.35564e-05
ISC/EB-prol	LOC5572967	LOC109422712	LOC5572967|AAEL010159	Down	-0.430987	0.0524175	1.10638e-05
ISC/EB-prol	LOC5573210	LOC109425771	LOC5573210|AAEL010300	Down	-0.431506	0.118905	0.00136798
ISC/EB-prol	LOC5570821	LOC109419949	LOC5570821|AAEL008594	Down	-0.431668	0.0864137	0.000352302
ISC/EB-prol	LOC5569674	LOC109406377	LOC5569674|AAEL007820	Down	-0.432193	0.098775	0.000411759
ISC/EB-prol	LOC5569591	LOC109419418	LOC5569591|AAEL026497	Down	-0.432559	0.10471	0.000508624
ISC/EB-prol	LOC5573964	LOC109410442	LOC5573964|AAEL010819	Down	-0.434285	0.0422887	1.1482e-06
ISC/EB-prol	LOC5569070	LOC109418060	LOC5569070|AAEL001207	Down	-0.435149	0.136154	0.00405518
ISC/EB-prol	LOC5575759	LOC109621272	LOC5575759|AAEL019529	Down	-0.435418	0.130216	0.00272405
ISC/EB-prol	LOC5575702	LOC109412507	LOC5575702|AAEL012016	Down	-0.439338	0.0952326	0.000397609
ISC/EB-prol	LOC5564542	LOC115254943	LOC5564542|AAEL004313	Down	-0.442781	0.111643	0.000468881
ISC/EB-prol	LOC5564503	LOC109425134	LOC5564503|AAEL004300	Down	-0.443736	0.118087	0.00100893
ISC/EB-prol	LOC5571930	LOC109410618	LOC5571930|AAEL009389	Down	-0.443994	0.0412851	1.99841e-06
ISC/EB-prol	LOC5564492	LOC109425142	LOC5564492|AAEL004294	Down	-0.445391	0.0884263	0.00186291
ISC/EB-prol	LOC5567421	LOC109430265	LOC5567421|AAEL006087	Down	-0.449023	0.13384	0.00214227
ISC/EB-prol	LOC5573492	LOC109622835	LOC5573492|AAEL010538	Down	-0.449691	0.0921226	0.000142887
ISC/EB-prol	LOC5564124	LOC109407627	LOC5564124|AAEL004086	Down	-0.451575	0.10529	0.000474026
ISC/EB-prol	LOC5563951	LOC109403272	LOC5563951|AAEL004041	Down	-0.452967	0.119786	0.00109329
ISC/EB-prol	LOC5576501	LOC109428450	LOC5576501|AAEL012552	Down	-0.453992	0.0895786	9.47609e-05
ISC/EB-prol	LOC5573868	LOC115263729	LOC5573868|AAEL010794	Down	-0.454875	0.0814378	0.000357112
ISC/EB-prol	LOC5572582	LOC109425384	LOC5572582|AAEL009898	Down	-0.456058	0.0650604	8.38014e-05
ISC/EB-prol	LOC5568807	LOC109419587	LOC5568807|AAEL001177	Down	-0.458166	0.0843829	4.60677e-05
ISC/EB-prol	LOC5573407	LOC115256393	LOC5573407|AAEL002077	Down	-0.460127	0.0778249	0.000213086
ISC/EB-prol	LOC5564317	LOC109406083	LOC5564317|AAEL000568	Down	-0.46062	0.0894788	0.000185887
ISC/EB-prol	LOC5575416	LOC109405755	LOC5575416|AAEL011813	Down	-0.462205	0.125133	0.00149794
ISC/EB-prol	LOC5564723	LOC109412921	LOC5564723|AAEL004415	Down	-0.462549	0.125818	0.00114023
ISC/EB-prol	LOC5575645	LOC109402436	LOC5575645|AAEL011979	Down	-0.466442	0.101555	6.68714e-05
ISC/EB-prol	LOC5569035	LOC109417547	LOC5569035|AAEL026700	Down	-0.467652	0.0887977	0.00170681
ISC/EB-prol	LOC5564130	LOC109407629	LOC5564130|AAEL004102	Down	-0.468095	0.127263	0.00126026
ISC/EB-prol	LOC5565931	LOC109414609	LOC5565931|AAEL025321	Down	-0.46871	0.0477697	1.03287e-05
ISC/EB-prol	LOC5579290	LOC109423566	LOC5579290|AAEL001544	Down	-0.469304	0.127825	0.000858401
ISC/EB-prol	LOC5574178	LOC109403171	LOC5574178|AAEL019806	Down	-0.470143	0.0931853	0.000328819
ISC/EB-prol	LOC5579816	LOC109431113	LOC5579816|AAEL018059	Down	-0.470412	0.124043	0.000864902
ISC/EB-prol	LOC5572257	LOC115258128	LOC5572257|AAEL009680	Down	-0.470788	0.0914733	0.000476882
ISC/EB-prol	LOC5564392	LOC109413004	LOC5564392|AAEL004234	Down	-0.472024	0.0403235	1.44182e-05
ISC/EB-prol	LOC5578257	LOC109409609	LOC5578257|AAEL013596	Down	-0.475877	0.0959044	0.000268054
ISC/EB-prol	LOC5577407	LOC109621577	LOC5577407|AAEL003161	Down	-0.478578	0.0507241	2.68674e-05
ISC/EB-prol	LOC5565051	LOC109430882	LOC5565051|AAEL004563	Down	-0.484446	0.093726	0.000278273
ISC/EB-prol	LOC110676030	LOC109425691	LOC110676030|AAEL024500	Down	-0.48455	0.101872	9.71481e-05
ISC/EB-prol	LOC110679868	LOC109401653	LOC110679868|AAEL027050	Down	-0.485899	0.0510373	0.00053196
ISC/EB-prol	LOC5566415	LOC109421935	LOC5566415|AAEL006036	Down	-0.485944	0.11099	0.000518364
ISC/EB-prol	LOC5575982	LOC109429299	LOC5575982|AAEL019430	Down	-0.487423	0.0852973	6.55276e-05
ISC/EB-prol	LOC5576835	LOC134291442	LOC5576835|AAEL012819	Down	-0.492649	0.0664878	0.000123035
ISC/EB-prol	LOC5573238	LOC109423293	LOC5573238|AAEL010330	Down	-0.492904	0.0711284	0.000108889
ISC/EB-prol	LOC5576629	LOC115265416	LOC5576629|AAEL012658	Down	-0.492965	0.0908023	9.31788e-05
ISC/EB-prol	LOC5574348	LOC109398016	LOC5574348|AAEL002350	Down	-0.493422	0.092209	7.40867e-05
ISC/EB-prol	LOC5564379	LOC109405422	LOC5564379|AAEL014414	Down	-0.494341	0.112468	0.000293085
ISC/EB-prol	LOC5576767	LOC109416470	LOC5576767|AAEL012751	Down	-0.49508	0.110857	0.000302902
ISC/EB-prol	LOC5568690	LOC109426897	LOC5568690|AAEL007065	Down	-0.495312	0.0370871	6.00118e-07
ISC/EB-prol	LOC5573956	LOC109621853	LOC5573956|AAEL002207	Down	-0.495617	0.134622	0.000802646
ISC/EB-prol	LOC5577291	LOC109420845	LOC5577291|AAEL013144	Down	-0.496892	0.0348909	7.2198e-06
ISC/EB-prol	LOC5580278	LOC109419166	LOC5580278|AAEL003011	Down	-0.499147	0.0644052	2.60253e-05
ISC/EB-prol	LOC5578291	LOC109422132	LOC5578291|AAEL013608	Down	-0.499218	0.124706	0.00103636
ISC/EB-prol	LOC5572696	LOC109417810	LOC5572696|AAEL009964	Down	-0.499445	0.0336333	1.31555e-05
ISC/EB-prol	LOC5569310	LOC115258685	LOC5569310|AAEL007549	Down	-0.499665	0.0386349	0.000201263
ISC/EB-prol	LOC5576478	LOC109422938	LOC5576478|AAEL002906	Down	-0.504471	0.130344	0.000407092
ISC/EB-prol	LOC5577777	LOC109411427	LOC5577777|AAEL003285	Down	-0.504962	0.0572087	6.63759e-05
ISC/EB-prol	LOC5570509	LOC109418082	LOC5570509|AAEL001432	Down	-0.505977	0.047004	1.79148e-05
ISC/EB-prol	LOC5567581	LOC109424033	LOC5567581|AAEL006174	Down	-0.509519	0.0727072	0.00105382
ISC/EB-prol	LOC5573606	LOC109398784	LOC5573606|AAEL002125	Down	-0.510129	0.0875747	1.22811e-05
ISC/EB-prol	LOC5569521	LOC109404625	LOC5569521|AAEL007698	Down	-0.512536	0.12754	0.000438476
ISC/EB-prol	LOC5568284	LOC109397285	LOC5568284|AAEL006711	Down	-0.512603	0.105233	0.000518408
ISC/EB-prol	LOC5568081	LOC109404622	LOC5568081|AAEL006516	Down	-0.513102	0.101433	0.000379725
ISC/EB-prol	LOC5577071	LOC109414823	LOC5577071|AAEL003106	Down	-0.516359	0.0876966	0.000124665
ISC/EB-prol	LOC5574862	LOC109422854	LOC5574862|AAEL011468	Down	-0.516965	0.0427741	1.68381e-05
ISC/EB-prol	LOC110676550	LOC109408287	LOC110676550|AAEL027436	Down	-0.51712	0.0967999	0.000176925
ISC/EB-prol	LOC5565829	LOC109416792	LOC5565829|AAEL005023	Down	-0.518847	0.113214	0.000402155
ISC/EB-prol	LOC5580021	LOC109414697	LOC5580021|AAEL009646	Down	-0.520083	0.0554951	6.23948e-06
ISC/EB-prol	LOC5573557	LOC115267137	LOC5573557|AAEL022931	Down	-0.521985	0.0955962	0.000264631
ISC/EB-prol	LOC5577080	LOC109399413	LOC5577080|AAEL012980	Down	-0.528751	0.0669003	1.97525e-05
ISC/EB-prol	LOC5578942	LOC109398472	LOC5578942|AAEL003752	Down	-0.531524	0.121211	0.000473549
ISC/EB-prol	LOC5575846	LOC109423921	LOC5575846|AAEL012119	Down	-0.534127	0.0946828	9.3397e-05
ISC/EB-prol	LOC5569287	LOC109410890	LOC5569287|AAEL007539	Down	-0.534629	0.123059	0.000578124
ISC/EB-prol	LOC110675667	LOC109416460	LOC110675667|AAEL024853	Down	-0.536475	0.0654058	1.27998e-05
ISC/EB-prol	LOC5576310	LOC109421839	LOC5576310|AAEL012457	Down	-0.536819	0.122452	0.000727502
ISC/EB-prol	LOC5563554	LOC115254260	LOC5563554|AAEL000081	Down	-0.538801	0.0976345	0.000134261
ISC/EB-prol	LOC5566450	LOC109400980	LOC5566450|AAEL005391	Down	-0.540807	0.0747466	7.72186e-05
ISC/EB-prol	LOC5570258	LOC109431947	LOC5570258|AAEL008220	Down	-0.541086	0.116592	0.000294363
ISC/EB-prol	LOC5570108	LOC109401825	LOC5570108|AAEL020238	Down	-0.541336	0.0171145	3.81166e-06
ISC/EB-prol	LOC5567314	LOC109419967	LOC5567314|AAEL005968	Down	-0.545643	0.124272	0.000376572
ISC/EB-prol	LOC5577289	LOC109412544	LOC5577289|AAEL013139	Down	-0.547456	0.0310451	3.78066e-05
ISC/EB-prol	LOC5577191	LOC109428472	LOC5577191|AAEL013076	Down	-0.54883	0.128436	0.000558503
ISC/EB-prol	LOC5565159	LOC109432062	LOC5565159|AAEL004613	Down	-0.549471	0.0851472	0.000103157
ISC/EB-prol	LOC23687553	LOC109423362	LOC23687553|AAEL017133	Down	-0.551673	0.105527	4.19258e-05
ISC/EB-prol	LOC5572713	LOC109427045	LOC5572713|AAEL023488	Down	-0.55243	0.12647	0.000668679
ISC/EB-prol	LOC23687901	LOC109400736	LOC23687901|AAEL017481	Down	-0.555065	0.0308923	4.81246e-06
ISC/EB-prol	LOC5568103	LOC109418985	LOC5568103|AAEL006538	Down	-0.555176	0.0733603	8.4644e-05
ISC/EB-prol	LOC5563880	LOC109403482	LOC5563880|AAEL014198	Down	-0.558437	0.0865297	5.71076e-05
ISC/EB-prol	LOC5568279	LOC115257160	LOC5568279|AAEL006713	Down	-0.564245	0.0847367	7.7566e-05
ISC/EB-prol	LOC5573549	LOC109410905	LOC5573549|AAEL025979	Down	-0.564341	0.105638	0.000170252
ISC/EB-prol	LOC5578458	LOC109403725	LOC5578458|AAEL000523	Down	-0.567565	0.0808353	1.35863e-05
ISC/EB-prol	LOC5574976	LOC109398402	LOC5574976|AAEL002501	Down	-0.568883	0.0514056	0.000368338
ISC/EB-prol	LOC5570914	LOC109432862	LOC5570914|AAEL001479	Down	-0.569857	0.0864499	0.000109738
ISC/EB-prol	LOC5576214	LOC134291854	LOC5576214|AAEL002827	Down	-0.572884	0.0369715	4.91899e-06
ISC/EB-prol	LOC5570017	LOC134291428	LOC5570017|AAEL000208	Down	-0.575142	0.0618622	2.35336e-05
ISC/EB-prol	LOC5579897	LOC109398749	LOC5579897|AAEL001048	Down	-0.57554	0.0824362	0.000108457
ISC/EB-prol	LOC5571609	LOC115268366	LOC5571609|AAEL009201	Down	-0.576862	0.0341306	0.000106396
ISC/EB-prol	LOC5567259	LOC109416303	LOC5567259|AAEL005931	Down	-0.584335	0.0672376	9.01281e-06
ISC/EB-prol	LOC5579199	LOC109415590	LOC5579199|AAEL014039	Down	-0.584469	0.0322895	4.98308e-06
ISC/EB-prol	LOC5580073	LOC109415200	LOC5580073|AAEL002158	Down	-0.584694	0.0506513	1.07009e-06
ISC/EB-prol	LOC5575971	LOC109414136	LOC5575971|AAEL012218	Down	-0.585038	0.104839	0.000140934
ISC/EB-prol	LOC5566684	LOC115262185	LOC5566684|AAEL005567	Down	-0.586177	0.0420613	1.32746e-05
ISC/EB-prol	LOC5570558	LOC109427333	LOC5570558|AAEL008364	Down	-0.587533	0.0979147	7.04135e-05
ISC/EB-prol	LOC5568799	LOC109409270	LOC5568799|AAEL001159	Down	-0.589651	0.0956189	5.54182e-05
ISC/EB-prol	LOC5576673	LOC109430729	LOC5576673|AAEL026023	Down	-0.58966	0.132474	0.000566267
ISC/EB-prol	LOC5564281	LOC109429471	LOC5564281|AAEL014375	Down	-0.589855	0.115058	0.000398758
ISC/EB-prol	LOC5574980	LOC109409415	LOC5574980|AAEL002508	Down	-0.593453	0.103168	5.36988e-05
ISC/EB-prol	LOC5570989	LOC109404483	LOC5570989|AAEL008719	Down	-0.593813	0.0739656	2.01492e-05
ISC/EB-prol	LOC5571414	LOC109406842	LOC5571414|AAEL009041	Down	-0.597136	0.0662042	2.31656e-05
ISC/EB-prol	LOC5578082	LOC115267841	LOC5578082|AAEL003423	Down	-0.598002	0.0555373	1.2038e-06
ISC/EB-prol	LOC5571907	LOC109397131	LOC5571907|AAEL009414	Down	-0.599718	0.0623279	2.49218e-05
ISC/EB-prol	LOC5574333	LOC109399511	LOC5574333|AAEL002337	Down	-0.601321	0.0657431	2.83725e-05
ISC/EB-prol	LOC5566028	LOC109426302	LOC5566028|AAEL005127	Down	-0.60326	0.10892	0.000316751
ISC/EB-prol	LOC5571418	LOC109411274	LOC5571418|AAEL009059	Down	-0.603286	0.0559408	0.000569341
ISC/EB-prol	LOC5579906	LOC109410394	LOC5579906|AAEL001037	Down	-0.604343	0.119752	0.000334988
ISC/EB-prol	LOC5564133	LOC109407632	LOC5564133|AAEL004088	Down	-0.605707	0.0369898	8.33407e-06
ISC/EB-prol	LOC5574369	LOC109414429	LOC5574369|AAEL011087	Down	-0.607796	0.0844324	8.21177e-05
ISC/EB-prol	LOC5570571	LOC109420146	LOC5570571|AAEL008379	Down	-0.607849	0.0966953	0.00021044
ISC/EB-prol	LOC23687533	LOC109418264	LOC23687533|AAEL017113	Down	-0.609232	0.105331	0.00021054
ISC/EB-prol	LOC5579012	LOC109402694	LOC5579012|AAEL003774	Down	-0.610948	0.101104	0.000167836
ISC/EB-prol	LOC5577026	LOC109428775	LOC5577026|AAEL012950	Down	-0.612073	0.081628	9.26366e-06
ISC/EB-prol	LOC5577429	LOC109427694	LOC5577429|AAEL013176	Down	-0.612299	0.0952044	5.19042e-05
ISC/EB-prol	LOC5574626	LOC109408300	LOC5574626|AAEL011264	Down	-0.613886	0.107191	0.00010661
ISC/EB-prol	LOC5570218	LOC109426333	LOC5570218|AAEL008153	Down	-0.616423	0.0750414	5.49912e-05
ISC/EB-prol	LOC5566238	LOC109397815	LOC5566238|AAEL005261	Down	-0.616893	0.106139	0.000284563
ISC/EB-prol	LOC5575751	LOC109410371	LOC5575751|AAEL002722	Down	-0.61718	0.081302	6.98792e-05
ISC/EB-prol	LOC5568881	LOC109406379	LOC5568881|AAEL007173	Down	-0.617806	0.0763592	1.42361e-05
ISC/EB-prol	LOC5565261	LOC109431109	LOC5565261|AAEL020830	Down	-0.619394	0.105135	0.00018781
ISC/EB-prol	LOC5564821	LOC109406346	LOC5564821|AAEL000626	Down	-0.623671	0.0408968	2.35732e-06
ISC/EB-prol	LOC5564895	LOC109430831	LOC5564895|AAEL014642	Down	-0.62714	0.0630056	3.04972e-05
ISC/EB-prol	LOC5563782	LOC109418330	LOC5563782|AAEL003946	Down	-0.627571	0.102369	0.00024297
ISC/EB-prol	LOC5578162	LOC109398650	LOC5578162|nan	Down	-0.627908	0.122674	0.000166927
ISC/EB-prol	LOC5571453	LOC109411467	LOC5571453|AAEL009074	Down	-0.629117	0.0429821	1.23248e-06
ISC/EB-prol	LOC5568482	LOC115253596	LOC5568482|AAEL006880	Down	-0.629182	0.114441	0.000290882
ISC/EB-prol	LOC110674049	LOC109397298	LOC110674049|AAEL027326	Down	-0.634613	0.0716665	1.99746e-05
ISC/EB-prol	LOC5572040	LOC109398203	LOC5572040|AAEL000226	Down	-0.635879	0.109094	0.00142888
ISC/EB-prol	LOC5570055	LOC109430465	LOC5570055|AAEL000159	Down	-0.642419	0.0987667	4.4879e-05
ISC/EB-prol	LOC5564364	LOC109408764	LOC5564364|AAEL013783	Down	-0.642729	0.0746387	4.63718e-05
ISC/EB-prol	LOC5573295	LOC109408662	LOC5573295|AAEL010382	Down	-0.644027	0.114569	0.000215
ISC/EB-prol	LOC5573443	LOC115262055	LOC5573443|AAEL010491	Down	-0.646197	0.111921	0.000167157
ISC/EB-prol	LOC5570223	LOC109426330	LOC5570223|AAEL008157	Down	-0.650064	0.0856406	4.8373e-05
ISC/EB-prol	LOC5575287	LOC109431598	LOC5575287|AAEL011750	Down	-0.650697	0.0724648	5.04124e-05
ISC/EB-prol	LOC5567383	LOC109427110	LOC5567383|AAEL006061	Down	-0.65136	0.0651196	2.89634e-06
ISC/EB-prol	LOC5568194	LOC109429811	LOC5568194|AAEL006611	Down	-0.651373	0.0914929	0.000140854
ISC/EB-prol	LOC5568820	LOC109419602	LOC5568820|AAEL001176	Down	-0.65166	0.123762	0.000254466
ISC/EB-prol	LOC5567260	LOC109424067	LOC5567260|AAEL005928	Down	-0.653719	0.103866	0.000151481
ISC/EB-prol	LOC5567898	LOC109426003	LOC5567898|AAEL006342	Down	-0.660621	0.112802	0.000178873
ISC/EB-prol	LOC5572383	LOC109422119	LOC5572383|AAEL009772	Down	-0.662125	0.0499038	4.28346e-06
ISC/EB-prol	LOC5564798	LOC115269424	LOC5564798|AAEL004423	Down	-0.662334	0.034028	3.16087e-05
ISC/EB-prol	LOC5569231	LOC109400498	LOC5569231|AAEL007481	Down	-0.666405	0.121593	0.000116242
ISC/EB-prol	LOC5573489	LOC109401913	LOC5573489|AAEL014505	Down	-0.669067	0.0663678	5.38013e-05
ISC/EB-prol	LOC5578857	LOC109424268	LOC5578857|AAEL027402	Down	-0.671648	0.0378551	3.5163e-07
ISC/EB-prol	LOC5567419	LOC109430284	LOC5567419|AAEL006066	Down	-0.675064	0.0784263	4.75286e-05
ISC/EB-prol	LOC5571173	LOC109406496	LOC5571173|AAEL008871	Down	-0.675925	0.0532612	6.55095e-06
ISC/EB-prol	LOC5566651	LOC134287788	LOC5566651|AAEL005500	Down	-0.676184	0.0876627	5.64971e-05
ISC/EB-prol	LOC5568291	LOC109426594	LOC5568291|AAEL006748	Down	-0.67934	0.111221	0.000136791
ISC/EB-prol	LOC5577761	LOC134289612	LOC5577761|AAEL003298	Down	-0.681912	0.118873	7.1493e-05
ISC/EB-prol	LOC5565447	LOC109426039	LOC5565447|AAEL000677	Down	-0.685484	0.107268	4.23178e-05
ISC/EB-prol	LOC5572650	LOC109420234	LOC5572650|AAEL001865	Down	-0.686107	0.0569912	9.52848e-07
ISC/EB-prol	LOC5567793	LOC109400116	LOC5567793|AAEL000138	Down	-0.686658	0.0685121	3.52801e-05
ISC/EB-prol	LOC5566009	LOC109398065	LOC5566009|AAEL005106	Down	-0.688244	0.103234	6.61997e-05
ISC/EB-prol	LOC5578184	LOC109431314	LOC5578184|AAEL003469	Down	-0.689653	0.0776771	1.4834e-05
ISC/EB-prol	LOC5564231	LOC109403775	LOC5564231|AAEL004176	Down	-0.693931	0.0597633	1.1554e-05
ISC/EB-prol	LOC5570069	LOC109429507	LOC5570069|AAEL001334	Down	-0.70338	0.121932	0.000173888
ISC/EB-prol	LOC5570670	LOC109622522	LOC5570670|AAEL008490	Down	-0.706014	0.0573574	3.65633e-06
ISC/EB-prol	LOC110677182	LOC109408543	LOC110677182|-	Down	-0.710598	0.018889	2.45394e-05
ISC/EB-prol	LOC5575223	LOC115253577	LOC5575223|AAEL010608	Down	-0.711322	0.0718843	7.00088e-06
ISC/EB-prol	LOC5578794	LOC109398644	LOC5578794|AAEL003664	Down	-0.713515	0.0740985	6.90178e-06
ISC/EB-prol	LOC5570784	LOC115263209	LOC5570784|AAEL022646	Down	-0.714594	0.109196	0.000144751
ISC/EB-prol	LOC5568113	LOC109419716	LOC5568113|AAEL006557	Down	-0.715615	0.0894176	3.74191e-05
ISC/EB-prol	LOC5565930	LOC109414612	LOC5565930|AAEL005054	Down	-0.717011	0.0951565	5.57543e-05
ISC/EB-prol	LOC5563592	LOC109400867	LOC5563592|AAEL000010	Down	-0.71723	0.0138697	4.08768e-05
ISC/EB-prol	LOC5577910	LOC109429944	LOC5577910|AAEL003352	Down	-0.718757	0.0472291	7.09817e-06
ISC/EB-prol	LOC5568222	LOC109431878	LOC5568222|AAEL006647	Down	-0.71977	0.0795612	2.64461e-05
ISC/EB-prol	LOC5567286	LOC109413902	LOC5567286|AAEL005946	Down	-0.724985	0.0541049	2.8995e-06
ISC/EB-prol	LOC5571886	LOC109431646	LOC5571886|AAEL019788	Down	-0.726601	0.0921596	0.000627573
ISC/EB-prol	LOC5568387	LOC109418819	LOC5568387|AAEL006771	Down	-0.72765	0.0891486	5.84513e-06
ISC/EB-prol	LOC5575681	LOC109419050	LOC5575681|AAEL011992	Down	-0.728391	0.048486	1.27571e-05
ISC/EB-prol	LOC5566092	LOC109406928	LOC5566092|AAEL005170	Down	-0.728825	0.0314389	1.00449e-06
ISC/EB-prol	LOC5578343	LOC109424491	LOC5578343|AAEL003514	Down	-0.729946	0.0960832	0.000140452
ISC/EB-prol	LOC5569738	LOC109410641	LOC5569738|AAEL007868	Down	-0.731075	0.0396737	1.45715e-05
ISC/EB-prol	LOC5567684	LOC109427053	LOC5567684|AAEL006251	Down	-0.731197	0.0693185	4.21411e-05
ISC/EB-prol	LOC5576079	LOC109406008	LOC5576079|AAEL012317	Down	-0.735093	0.0560019	2.86011e-06
ISC/EB-prol	LOC5565869	LOC109429097	LOC5565869|AAEL015007	Down	-0.735464	0.0880141	4.59928e-05
ISC/EB-prol	LOC23687627	LOC109425480	LOC23687627|AAEL021288	Down	-0.736837	0.0910516	1.21586e-05
ISC/EB-prol	LOC5570234	LOC109407229	LOC5570234|AAEL008179	Down	-0.738847	0.105632	2.17464e-05
ISC/EB-prol	LOC110681498	LOC109399951	LOC110681498|AAEL023347	Down	-0.741394	0.0587296	2.59589e-05
ISC/EB-prol	LOC5575808	LOC109406147	LOC5575808|AAEL012071	Down	-0.741909	0.0960732	5.80528e-05
ISC/EB-prol	LOC5564146	LOC109404944	LOC5564146|AAEL014325	Down	-0.746702	0.0887678	2.19403e-05
ISC/EB-prol	LOC5568520	LOC109426523	LOC5568520|AAEL027905	Down	-0.758802	0.0970185	5.62093e-05
ISC/EB-prol	LOC5569740	LOC109410643	LOC5569740|AAEL022979	Down	-0.760139	0.0989876	2.85159e-05
ISC/EB-prol	LOC5573182	LOC109421440	LOC5573182|AAEL001972	Down	-0.761504	0.126641	0.000169619
ISC/EB-prol	LOC5570788	LOC109424158	LOC5570788|AAEL008556	Down	-0.76502	0.101608	2.62356e-05
ISC/EB-prol	LOC5575242	LOC109407972	LOC5575242|AAEL011711	Down	-0.768524	0.0245128	8.38002e-07
ISC/EB-prol	LOC5579391	LOC109414321	LOC5579391|AAEL015493	Down	-0.770396	0.0625344	0.000377932
ISC/EB-prol	LOC5579060	LOC109406031	LOC5579060|AAEL013992	Down	-0.773564	0.090195	3.70733e-05
ISC/EB-prol	LOC5577113	LOC115257348	LOC5577113|AAEL008697	Down	-0.774736	0.0305824	3.00347e-08
ISC/EB-prol	LOC5576737	LOC109409079	LOC5576737|AAEL002978	Down	-0.77691	0.0947015	0.000160788
ISC/EB-prol	LOC5566166	LOC115254176	LOC5566166|AAEL005221	Down	-0.777447	0.0890653	1.99827e-05
ISC/EB-prol	LOC5564045	LOC115260709	LOC5564045|AAEL004076	Down	-0.780773	0.118866	4.73075e-05
ISC/EB-prol	LOC5576003	LOC109412161	LOC5576003|AAEL025078	Down	-0.781034	0.108349	9.49783e-05
ISC/EB-prol	LOC5576103	LOC115269975	LOC5576103|AAEL002797	Down	-0.781162	0.080225	2.0079e-05
ISC/EB-prol	LOC5566901	LOC109408356	LOC5566901|AAEL000854	Down	-0.782083	0.0775727	2.31844e-05
ISC/EB-prol	LOC23687624	LOC109622164	LOC23687624|AAEL017204	Down	-0.78319	0.0809346	1.30701e-05
ISC/EB-prol	LOC5564301	LOC109406155	LOC5564301|AAEL018336	Down	-0.783349	0.10934	4.87938e-05
ISC/EB-prol	LOC5569539	LOC109403454	LOC5569539|AAEL007713	Down	-0.784047	0.10392	3.08925e-05
ISC/EB-prol	LOC5578150	LOC109433257	LOC5578150|AAEL013538	Down	-0.784207	0.0974587	2.76566e-05
ISC/EB-prol	LOC5570895	LOC109432899	LOC5570895|AAEL001496	Down	-0.793079	0.105225	4.42312e-05
ISC/EB-prol	LOC5575512	LOC109430137	LOC5575512|AAEL011881	Down	-0.796975	0.0848817	1.33982e-05
ISC/EB-prol	LOC5577105	LOC109417669	LOC5577105|AAEL013005	Down	-0.797418	0.123464	0.000119361
ISC/EB-prol	LOC5569222	LOC109417729	LOC5569222|AAEL007494	Down	-0.798689	0.0655743	6.47372e-06
ISC/EB-prol	LOC5571747	LOC109416702	LOC5571747|AAEL009273	Down	-0.800512	0.0886608	3.18357e-05
ISC/EB-prol	LOC5563706	LOC109417128	LOC5563706|AAEL003921	Down	-0.800738	0.0972831	4.01391e-05
ISC/EB-prol	LOC5571804	LOC115253538	LOC5571804|AAEL009324	Down	-0.800816	0.0950882	0.000161462
ISC/EB-prol	LOC5569181	LOC109429440	LOC5569181|AAEL007441	Down	-0.802407	0.0466401	1.81865e-06
ISC/EB-prol	LOC5565994	LOC109407921	LOC5565994|AAEL015041	Down	-0.803963	0.116709	6.04441e-05
ISC/EB-prol	LOC5567476	LOC109406089	LOC5567476|AAEL000948	Down	-0.807454	0.0855534	7.18572e-05
ISC/EB-prol	LOC5565270	LOC109432379	LOC5565270|AAEL004691	Down	-0.807869	0.0382319	9.25564e-06
ISC/EB-prol	LOC5568468	LOC109423330	LOC5568468|AAEL006887	Down	-0.810884	0.121882	0.00017692
ISC/EB-prol	LOC5569056	LOC109408281	LOC5569056|AAEL007343	Down	-0.812946	0.117763	0.000180338
ISC/EB-prol	LOC5577406	LOC109400097	LOC5577406|AAEL003179	Down	-0.813071	0.0614458	3.74322e-05
ISC/EB-prol	LOC5566703	LOC109425913	LOC5566703|AAEL005583	Down	-0.816063	0.103842	3.66237e-05
ISC/EB-prol	LOC5571484	LOC109426686	LOC5571484|AAEL001605	Down	-0.816436	0.0740521	1.15207e-05
ISC/EB-prol	LOC5580055	LOC109402218	LOC5580055|AAEL022806	Down	-0.816792	0.0834725	1.77797e-05
ISC/EB-prol	LOC5566793	LOC109398022	LOC5566793|AAEL026243	Down	-0.818452	0.0636198	5.66286e-05
ISC/EB-prol	LOC5570205	LOC109405631	LOC5570205|AAEL008167	Down	-0.819488	0.0849739	2.17525e-05
ISC/EB-prol	LOC5566652	LOC109411157	LOC5566652|AAEL012472	Down	-0.821595	0.111558	5.78719e-05
ISC/EB-prol	LOC5567590	LOC109426226	LOC5567590|AAEL006172	Down	-0.822486	0.102461	1.5989e-05
ISC/EB-prol	LOC5566773	LOC109397889	LOC5566773|AAEL005628	Down	-0.824476	0.0851017	1.50987e-05
ISC/EB-prol	LOC5570960	LOC115258816	LOC5570960|AAEL008692	Down	-0.824774	0.0510858	0.000210483
ISC/EB-prol	LOC5567500	LOC109403475	LOC5567500|AAEL006117	Down	-0.825217	0.104015	0.000151618
ISC/EB-prol	LOC5574494	LOC115258703	LOC5574494|AAEL002377	Down	-0.826185	0.0659549	2.26164e-06
ISC/EB-prol	LOC5566214	LOC109420228	LOC5566214|AAEL005277	Down	-0.827698	0.103894	0.000104675
ISC/EB-prol	LOC5567908	LOC109414063	LOC5567908|AAEL006363	Down	-0.828182	0.110346	0.000114193
ISC/EB-prol	LOC5577327	LOC115269140	LOC5577327|AAEL000410	Down	-0.829036	0.0624104	1.69297e-05
ISC/EB-prol	LOC5565400	LOC134287870	LOC5565400|AAEL004783	Down	-0.831023	0.0334789	2.91195e-07
ISC/EB-prol	LOC5568150	LOC109415473	LOC5568150|AAEL006577	Down	-0.835067	0.0802907	9.44517e-06
ISC/EB-prol	LOC5565635	LOC134285831	LOC5565635|AAEL028015	Down	-0.835975	0.113606	9.18288e-05
ISC/EB-prol	LOC5570237	LOC109426316	LOC5570237|AAEL008171	Down	-0.847845	0.0900647	4.96793e-05
ISC/EB-prol	LOC5575162	LOC109420670	LOC5575162|AAEL000328	Down	-0.849467	0.0813838	1.23551e-05
ISC/EB-prol	LOC5573995	LOC109403224	LOC5573995|AAEL015118	Down	-0.850719	0.111817	5.04089e-05
ISC/EB-prol	LOC5576001	LOC109431413	LOC5576001|AAEL012243	Down	-0.851295	0.0949297	4.18434e-05
ISC/EB-prol	LOC5569859	LOC115255347	LOC5569859|AAEL007947	Down	-0.851637	0.0696869	1.9202e-05
ISC/EB-prol	LOC5580260	LOC109414335	LOC5580260|AAEL012586	Down	-0.852047	0.105834	2.95019e-05
ISC/EB-prol	LOC5569088	LOC109400368	LOC5569088|AAEL007363	Down	-0.852893	0.116172	9.89831e-05
ISC/EB-prol	LOC5566612	LOC109405798	LOC5566612|AAEL000770	Down	-0.853407	0.11142	1.87014e-05
ISC/EB-prol	LOC5572925	LOC109401397	LOC5572925|AAEL010143	Down	-0.855991	0.094399	1.1189e-05
ISC/EB-prol	LOC5576221	LOC134291863	LOC5576221|AAEL002833	Down	-0.857353	0.0448029	2.31456e-06
ISC/EB-prol	LOC5573121	LOC109621336	LOC5573121|AAEL001974	Down	-0.8591	0.102287	5.08731e-05
ISC/EB-prol	LOC5573644	LOC109621987	LOC5573644|AAEL010641	Down	-0.864206	0.10911	1.58831e-05
ISC/EB-prol	LOC5575837	LOC109402166	LOC5575837|AAEL012094	Down	-0.864483	0.0608185	4.08926e-05
ISC/EB-prol	LOC5570916	LOC109401408	LOC5570916|AAEL001501	Down	-0.867294	0.0564428	0.000223535
ISC/EB-prol	LOC5575135	LOC109400752	LOC5575135|AAEL000330	Down	-0.870067	0.0817737	2.5287e-05
ISC/EB-prol	LOC5568016	LOC109399345	LOC5568016|AAEL006473	Down	-0.87278	0.109152	4.67907e-05
ISC/EB-prol	LOC5580036	LOC109423962	LOC5580036|AAEL010230	Down	-0.876928	0.0498983	0.000194509
ISC/EB-prol	LOC5565637	LOC134285834	LOC5565637|AAEL014915	Down	-0.878996	0.098554	1.76351e-05
ISC/EB-prol	LOC5564225	LOC109403769	LOC5564225|AAEL023037	Down	-0.884227	0.0714894	2.39812e-06
ISC/EB-prol	LOC5578382	LOC109405528	LOC5578382|AAEL013661	Down	-0.887339	0.0274334	1.06852e-06
ISC/EB-prol	LOC5564627	LOC109410014	LOC5564627|AAEL025567	Down	-0.888997	0.076707	1.62093e-05
ISC/EB-prol	LOC5566650	LOC109621576	LOC5566650|AAEL015644	Down	-0.890277	0.0702213	3.15409e-06
ISC/EB-prol	LOC5566608	LOC115258006	LOC5566608|AAEL000791	Down	-0.891547	0.0771476	2.64521e-06
ISC/EB-prol	LOC5574643	LOC109415102	LOC5574643|AAEL011282	Down	-0.891967	0.118044	3.9838e-05
ISC/EB-prol	LOC5565318	LOC109398260	LOC5565318|AAEL004733	Down	-0.894501	0.095768	2.38779e-05
ISC/EB-prol	LOC5575843	LOC109404805	LOC5575843|AAEL012122	Down	-0.894545	0.101856	1.73055e-05
ISC/EB-prol	LOC5575478	LOC109431303	LOC5575478|AAEL011865	Down	-0.900017	0.110321	9.90054e-05
ISC/EB-prol	LOC5566935	LOC109433368	LOC5566935|AAEL005709	Down	-0.901277	0.0853239	7.92078e-07
ISC/EB-prol	LOC5575714	LOC115253942	LOC5575714|AAEL012023	Down	-0.904163	0.0960311	2.81545e-05
ISC/EB-prol	LOC5568558	LOC115262194	LOC5568558|AAEL001134	Down	-0.911138	0.0976622	6.79097e-05
ISC/EB-prol	LOC110673996	LOC109401126	LOC110673996|-	Down	-0.912193	0.102332	0.000133221
ISC/EB-prol	LOC5576532	LOC109423544	LOC5576532|AAEL012579	Down	-0.915436	0.0880207	0.000576323
ISC/EB-prol	LOC5573744	LOC109422303	LOC5573744|AAEL019937	Down	-0.918182	0.0381781	6.92091e-08
ISC/EB-prol	LOC5576170	LOC109408005	LOC5576170|AAEL012359	Down	-0.920674	0.0279267	3.80907e-09
ISC/EB-prol	LOC5566079	LOC109424859	LOC5566079|AAEL015064	Down	-0.925441	0.0365911	6.89626e-05
ISC/EB-prol	LOC5571045	LOC109423871	LOC5571045|AAEL008770	Down	-0.927362	0.0652936	1.1931e-05
ISC/EB-prol	LOC5573313	LOC109416354	LOC5573313|AAEL010419	Down	-0.92824	0.107931	3.53819e-05
ISC/EB-prol	LOC5576082	LOC109406020	LOC5576082|AAEL012312	Down	-0.935691	0.0677978	3.39668e-05
ISC/EB-prol	LOC5576353	LOC109416865	LOC5576353|AAEL002881	Down	-0.936029	0.031856	9.28212e-08
ISC/EB-prol	LOC5565619	LOC109400996	LOC5565619|AAEL014899	Down	-0.937993	0.097268	2.8856e-05
ISC/EB-prol	LOC5566059	LOC109400800	LOC5566059|AAEL005143	Down	-0.938144	0.0370138	4.12028e-07
ISC/EB-prol	LOC5570063	LOC109429508	LOC5570063|AAEL001354	Down	-0.938391	0.0864722	3.12464e-05
ISC/EB-prol	LOC5571437	LOC109406399	LOC5571437|AAEL009070	Down	-0.940126	0.101419	5.52342e-05
ISC/EB-prol	LOC5570230	LOC109426283	LOC5570230|AAEL008152	Down	-0.946031	0.112328	2.42469e-05
ISC/EB-prol	LOC5563713	LOC109417122	LOC5563713|AAEL003916	Down	-0.94871	0.102718	1.66199e-05
ISC/EB-prol	LOC5571035	LOC109428913	LOC5571035|AAEL008755	Down	-0.951747	0.117055	3.62111e-05
ISC/EB-prol	LOC5574746	LOC109405382	LOC5574746|AAEL011381	Down	-0.953649	0.0666879	3.40668e-06
ISC/EB-prol	LOC5575550	LOC109410823	LOC5575550|AAEL002661	Down	-0.966708	0.0539903	3.73521e-06
ISC/EB-prol	LOC5579263	LOC109412524	LOC5579263|AAEL011873	Down	-0.967279	0.0619667	3.7654e-07
ISC/EB-prol	LOC5564272	LOC115268465	LOC5564272|AAEL014368	Down	-0.968691	0.101799	0.000611899
ISC/EB-prol	LOC5574995	LOC109400388	LOC5574995|AAEL002523	Down	-0.976455	0.090301	6.43882e-06
ISC/EB-prol	LOC5578833	LOC109399426	LOC5578833|AAEL013876	Down	-0.980506	0.0643583	6.85679e-06
ISC/EB-prol	LOC5572478	LOC109406732	LOC5572478|AAEL009808	Down	-0.981638	0.0697832	9.59375e-06
ISC/EB-prol	LOC5569898	LOC109399253	LOC5569898|AAEL008002	Down	-0.984594	0.0519433	1.04142e-06
ISC/EB-prol	LOC5574519	LOC109413993	LOC5574519|AAEL011192	Down	-0.987561	0.12082	7.57553e-06
ISC/EB-prol	LOC5567465	LOC109403370	LOC5567465|AAEL000942	Down	-0.991621	0.0723222	1.469e-06
ISC/EB-prol	LOC5571067	LOC109401060	LOC5571067|AAEL008786	Down	-0.993075	0.0999673	2.12432e-05
ISC/EB-prol	LOC5568019	LOC109405647	LOC5568019|AAEL006458	Down	-0.997846	0.108383	5.64189e-05
ISC/EB-prol	LOC5568553	LOC109411242	LOC5568553|AAEL001109	Down	-0.998937	0.104354	3.04474e-05
ISC/EB-prol	LOC5577626	LOC109420697	LOC5577626|AAEL003210	Down	-1.00218	0.0821358	1.18094e-05
ISC/EB-prol	LOC5579044	LOC115264678	LOC5579044|AAEL013982	Down	-1.00866	0.0715033	0.000314759
ISC/EB-prol	LOC5564091	LOC109408928	LOC5564091|AAEL028021	Down	-1.01049	0.0472192	1.14917e-06
ISC/EB-prol	LOC5568998	LOC109402787	LOC5568998|AAEL025594	Down	-1.01164	0.10552	4.65202e-05
ISC/EB-prol	LOC5578538	LOC109417839	LOC5578538|AAEL013744	Down	-1.01372	0.057544	1.93015e-06
ISC/EB-prol	LOC5564065	LOC109431398	LOC5564065|AAEL004081	Down	-1.01992	0.0757713	8.6299e-06
ISC/EB-prol	LOC5577555	LOC115269198	LOC5577555|AAEL013267	Down	-1.02136	0.0780396	2.44101e-06
ISC/EB-prol	LOC5573948	LOC109421304	LOC5573948|AAEL002183	Down	-1.02168	0.0443544	2.08001e-06
ISC/EB-prol	LOC5564809	LOC109397080	LOC5564809|AAEL014630	Down	-1.02367	0.0889704	7.30267e-06
ISC/EB-prol	LOC5566613	LOC109401438	LOC5566613|AAEL000757	Down	-1.02414	0.129161	0.000119051
ISC/EB-prol	LOC5575009	LOC109414743	LOC5575009|AAEL011568	Down	-1.02445	0.112516	0.000136981
ISC/EB-prol	LOC5572308	LOC109402833	LOC5572308|AAEL009700	Down	-1.03017	0.0850147	2.10536e-05
ISC/EB-prol	LOC5566478	LOC109429298	LOC5566478|AAEL005411	Down	-1.03331	0.100887	3.62152e-05
ISC/EB-prol	LOC5565085	LOC109415235	LOC5565085|AAEL023069	Down	-1.03919	0.0984289	4.79883e-05
ISC/EB-prol	LOC5572447	LOC109407750	LOC5572447|AAEL001831	Down	-1.04763	0.106563	9.40769e-06
ISC/EB-prol	LOC5577630	LOC109420692	LOC5577630|AAEL003234	Down	-1.0513	0.0336511	1.327e-06
ISC/EB-prol	LOC5576021	LOC109405842	LOC5576021|AAEL019755	Down	-1.05484	0.111296	4.6575e-05
ISC/EB-prol	LOC5564545	LOC109427525	LOC5564545|AAEL004308	Down	-1.05518	0.0675419	1.00236e-06
ISC/EB-prol	LOC5576223	LOC134291865	LOC5576223|AAEL002825	Down	-1.05619	0.0497791	7.71036e-06
ISC/EB-prol	LOC5571976	LOC109401911	LOC5571976|AAEL009467	Down	-1.05982	0.0742399	1.22775e-05
ISC/EB-prol	LOC5570208	LOC109405004	LOC5570208|AAEL008169	Down	-1.06954	0.0842591	2.86636e-06
ISC/EB-prol	LOC5576040	LOC115256971	LOC5576040|AAEL012276	Down	-1.07024	0.106611	2.63936e-05
ISC/EB-prol	LOC5570550	LOC109419258	LOC5570550|AAEL008363	Down	-1.0723	0.083947	6.68971e-06
ISC/EB-prol	LOC5567167	LOC109429172	LOC5567167|AAEL005897	Down	-1.07693	0.0886039	3.85824e-06
ISC/EB-prol	LOC5573990	LOC109425667	LOC5573990|AAEL010840	Down	-1.07784	0.0622676	1.04191e-05
ISC/EB-prol	LOC5569798	LOC109414924	LOC5569798|AAEL001314	Down	-1.07796	0.0743543	2.41213e-05
ISC/EB-prol	LOC5570114	LOC109414700	LOC5570114|AAEL008079	Down	-1.0794	0.0698713	1.77219e-05
ISC/EB-prol	LOC5570111	LOC115255731	LOC5570111|AAEL008097	Down	-1.08258	0.112615	2.29034e-05
ISC/EB-prol	LOC5573615	LOC109401281	LOC5573615|AAEL010611	Down	-1.08476	0.0450055	9.84203e-07
ISC/EB-prol	LOC5572640	LOC109433084	LOC5572640|AAEL001838	Down	-1.0867	0.0820365	3.59578e-07
ISC/EB-prol	LOC5580166	LOC109425340	LOC5580166|AAEL002542	Down	-1.09202	0.0708889	3.16804e-06
ISC/EB-prol	LOC5579180	LOC134291549	LOC5579180|AAEL003896	Down	-1.09677	0.100143	1.78788e-05
ISC/EB-prol	LOC5575395	LOC109419190	LOC5575395|AAEL011803	Down	-1.10086	0.107714	7.51329e-05
ISC/EB-prol	LOC5571450	LOC109409719	LOC5571450|AAEL009078	Down	-1.10215	0.0566295	8.31261e-06
ISC/EB-prol	LOC5571397	LOC109404972	LOC5571397|AAEL009029	Down	-1.1048	0.0765435	1.55382e-05
ISC/EB-prol	LOC5568828	LOC109419613	LOC5568828|AAEL001164	Down	-1.10483	0.053769	3.07742e-06
ISC/EB-prol	LOC5574834	LOC109415142	LOC5574834|AAEL011433	Down	-1.10695	0.0966219	2.32623e-05
ISC/EB-prol	LOC5575492	LOC109420827	LOC5575492|AAEL011871	Down	-1.10762	0.0365232	1.87038e-07
ISC/EB-prol	LOC5567100	LOC109415625	LOC5567100|AAEL005830	Down	-1.11423	0.0823541	8.47388e-06
ISC/EB-prol	LOC5577483	LOC109413115	LOC5577483|AAEL013236	Down	-1.12052	0.0808108	5.86125e-06
ISC/EB-prol	LOC5574387	LOC134288032	LOC5574387|AAEL019777	Down	-1.12244	0.0887672	1.10529e-05
ISC/EB-prol	LOC5573976	LOC109410418	LOC5573976|AAEL010814	Down	-1.12362	0.0943151	1.70065e-05
ISC/EB-prol	LOC5578532	LOC109429328	LOC5578532|AAEL013739	Down	-1.12788	0.0695544	2.28717e-06
ISC/EB-prol	LOC5565955	LOC115264212	LOC5565955|AAEL005052	Down	-1.12897	0.0690293	2.3356e-05
ISC/EB-prol	LOC5564518	LOC109405001	LOC5564518|AAEL019716	Down	-1.13058	0.0593308	2.20695e-06
ISC/EB-prol	LOC23687671	LOC109424480	LOC23687671|AAEL017251	Down	-1.13406	0.0759065	4.0291e-06
ISC/EB-prol	LOC5575041	LOC109423304	LOC5575041|AAEL011588	Down	-1.13901	0.106564	7.09087e-06
ISC/EB-prol	LOC5578307	LOC109401885	LOC5578307|AAEL013628	Down	-1.14014	0.0679864	3.86947e-06
ISC/EB-prol	LOC5564039	LOC109427769	LOC5564039|AAEL004065	Down	-1.14263	0.0748822	1.16224e-05
ISC/EB-prol	LOC5564962	LOC115253842	LOC5564962|AAEL014889	Down	-1.1455	0.0565696	1.3468e-06
ISC/EB-prol	LOC5565156	LOC109432057	LOC5565156|AAEL004616	Down	-1.14653	0.0837183	7.45092e-06
ISC/EB-prol	LOC5568428	LOC109414165	LOC5568428|AAEL006836	Down	-1.14923	0.0844534	5.84319e-07
ISC/EB-prol	LOC5573538	LOC109404182	LOC5573538|AAEL010582	Down	-1.15599	0.111612	3.09209e-06
ISC/EB-prol	LOC5563654	LOC109416752	LOC5563654|AAEL000091	Down	-1.15769	0.0924725	0.000459245
ISC/EB-prol	LOC5574943	LOC109412057	LOC5574943|AAEL010453	Down	-1.16166	0.0826772	6.23075e-05
ISC/EB-prol	LOC5567565	LOC109413801	LOC5567565|AAEL006169	Down	-1.16658	0.0521422	1.08551e-06
ISC/EB-prol	LOC5569074	LOC109421664	LOC5569074|AAEL001210	Down	-1.17379	0.0577862	4.56838e-07
ISC/EB-prol	LOC5574741	LOC109431071	LOC5574741|AAEL011379	Down	-1.17894	0.107006	5.09118e-05
ISC/EB-prol	LOC5567396	LOC109427107	LOC5567396|AAEL006053	Down	-1.18095	0.0539953	4.77071e-08
ISC/EB-prol	LOC5570801	LOC115256201	LOC5570801|AAEL008575	Down	-1.18222	0.105637	5.61635e-05
ISC/EB-prol	LOC5574484	LOC109419105	LOC5574484|AAEL002401	Down	-1.20751	0.0666326	1.57985e-06
ISC/EB-prol	LOC5564632	LOC109421352	LOC5564632|AAEL004350	Down	-1.21138	0.105814	1.30171e-05
ISC/EB-prol	LOC5566081	LOC109423177	LOC5566081|AAEL005162	Down	-1.21758	0.103059	5.82339e-05
ISC/EB-prol	LOC5576100	LOC115269988	LOC5576100|AAEL002789	Down	-1.22218	0.0854967	3.43749e-07
ISC/EB-prol	LOC23687710	LOC109622895	LOC23687710|AAEL017290	Down	-1.2224	0.04363	2.63301e-06
ISC/EB-prol	LOC5571596	LOC109417874	LOC5571596|AAEL009185	Down	-1.22271	0.0353148	2.69266e-07
ISC/EB-prol	LOC5568602	LOC115262042	LOC5568602|AAEL001103	Down	-1.23059	0.0656719	3.67555e-05
ISC/EB-prol	LOC5565550	LOC109414878	LOC5565550|AAEL004854	Down	-1.24376	0.054652	7.00776e-07
ISC/EB-prol	LOC5565453	LOC109426035	LOC5565453|AAEL000667	Down	-1.25072	0.120066	0.000129038
ISC/EB-prol	LOC5573753	LOC109424464	LOC5573753|AAEL000270	Down	-1.25482	0.0931645	1.67116e-05
ISC/EB-prol	LOC5578121	LOC109401278	LOC5578121|AAEL003431	Down	-1.2552	0.0813011	3.24301e-05
ISC/EB-prol	LOC5564118	LOC115256953	LOC5564118|AAEL004118	Down	-1.2566	0.0736688	4.45937e-06
ISC/EB-prol	LOC5572748	LOC109407927	LOC5572748|AAEL010032	Down	-1.25805	0.0529077	2.46745e-07
ISC/EB-prol	LOC5568717	LOC109426927	LOC5568717|AAEL007043	Down	-1.26415	0.0742842	2.97637e-06
ISC/EB-prol	LOC5577193	LOC109428473	LOC5577193|AAEL013075	Down	-1.27608	0.0852967	3.49656e-06
ISC/EB-prol	LOC5572949	LOC109431862	LOC5572949|AAEL010171	Down	-1.27769	0.145591	2.72265e-05
ISC/EB-prol	LOC5580156	LOC109411919	LOC5580156|AAEL025606	Down	-1.27974	0.108771	4.34078e-06
ISC/EB-prol	LOC5579328	LOC109423323	LOC5579328|AAEL023188	Down	-1.28675	0.0780517	4.6021e-06
ISC/EB-prol	LOC5566457	LOC109398470	LOC5566457|AAEL005428	Down	-1.28731	0.0783022	1.61352e-05
ISC/EB-prol	LOC110679616	LOC109413556	LOC110679616|AAEL027646	Down	-1.28981	0.0663303	5.04869e-06
ISC/EB-prol	LOC5578147	LOC109412192	LOC5578147|AAEL013528	Down	-1.30296	0.0724501	5.82224e-06
ISC/EB-prol	LOC5579021	LOC109414398	LOC5579021|AAEL013960	Down	-1.30903	0.0608898	1.05598e-06
ISC/EB-prol	LOC5566344	LOC109419671	LOC5566344|AAEL020936	Down	-1.31535	0.0910781	1.58284e-08
ISC/EB-prol	LOC5579168	LOC134284133	LOC5579168|AAEL003871	Down	-1.32847	0.083205	5.67131e-06
ISC/EB-prol	LOC5565279	LOC109405868	LOC5565279|AAEL014799	Down	-1.32906	0.087789	9.24737e-06
ISC/EB-prol	LOC5572372	LOC115266806	LOC5572372|AAEL009760	Down	-1.34427	0.052871	2.55576e-06
ISC/EB-prol	LOC23687393	LOC109429383	LOC23687393|AAEL016973	Down	-1.34468	0.0981127	4.04874e-06
ISC/EB-prol	LOC5577355	LOC109427257	LOC5577355|AAEL000458	Down	-1.34522	0.0696533	9.18649e-07
ISC/EB-prol	LOC5579885	LOC109410375	LOC5579885|AAEL001030	Down	-1.34905	0.096551	7.67675e-06
ISC/EB-prol	LOC5566987	LOC109402479	LOC5566987|AAEL005742	Down	-1.35292	0.0848748	9.84112e-06
ISC/EB-prol	LOC5567996	LOC109402517	LOC5567996|AAEL006441	Down	-1.35345	0.0858809	2.26085e-06
ISC/EB-prol	LOC5572867	LOC109430680	LOC5572867|AAEL010087	Down	-1.36958	0.0678811	1.74907e-06
ISC/EB-prol	LOC5567118	LOC109399440	LOC5567118|AAEL015304	Down	-1.37179	0.079573	1.46774e-05
ISC/EB-prol	LOC5577272	LOC109404370	LOC5577272|AAEL013121	Down	-1.37287	0.0992564	0.00024679
ISC/EB-prol	LOC5569895	LOC109399229	LOC5569895|AAEL008006	Down	-1.37637	0.104232	5.95027e-06
ISC/EB-prol	LOC5566654	LOC109416331	LOC5566654|AAEL005508	Down	-1.39271	0.0727073	1.32871e-05
ISC/EB-prol	LOC5571011	LOC109418514	LOC5571011|AAEL008736	Down	-1.39596	0.0793943	1.42213e-06
ISC/EB-prol	LOC5570695	LOC109433573	LOC5570695|AAEL008492	Down	-1.40171	0.088846	5.63823e-06
ISC/EB-prol	LOC5574723	LOC109405109	LOC5574723|AAEL011357	Down	-1.40505	0.095613	8.92152e-06
ISC/EB-prol	LOC5573938	LOC109621801	LOC5573938|AAEL002198	Down	-1.41806	0.0866293	4.94056e-06
ISC/EB-prol	LOC5569832	LOC109426996	LOC5569832|AAEL007942	Down	-1.44033	0.129021	1.25145e-05
ISC/EB-prol	LOC5571664	LOC109408124	LOC5571664|AAEL024228	Down	-1.44314	0.0466681	8.76656e-07
ISC/EB-prol	LOC5573705	LOC109399514	LOC5573705|AAEL010691	Down	-1.46729	0.119568	3.88405e-05
ISC/EB-prol	LOC5571429	LOC134287924	LOC5571429|AAEL009066	Down	-1.47586	0.0527619	2.73364e-07
ISC/EB-prol	LOC5567329	LOC109402823	LOC5567329|AAEL005997	Down	-1.49065	0.0735791	1.93066e-06
ISC/EB-prol	LOC5569540	LOC109433195	LOC5569540|AAEL007717	Down	-1.51233	0.0793299	2.22661e-05
ISC/EB-prol	LOC5573667	LOC109401545	LOC5573667|AAEL010673	Down	-1.54033	0.0688836	6.38322e-06
ISC/EB-prol	LOC5573437	LOC115264141	LOC5573437|AAEL010479	Down	-1.54586	0.115364	7.29924e-06
ISC/EB-prol	LOC110681201	LOC109403403	LOC110681201|nan	Down	-1.54729	0.0802868	2.45215e-05
ISC/EB-prol	LOC5572209	LOC109431683	LOC5572209|AAEL009601	Down	-1.54952	0.0748341	3.22547e-06
ISC/EB-prol	LOC110678469	LOC109415665	LOC110678469|AAEL027771	Down	-1.56458	0.0749026	3.10003e-06
ISC/EB-prol	LOC5568296	LOC109426587	LOC5568296|AAEL006728	Down	-1.59204	0.0932587	3.0171e-06
ISC/EB-prol	LOC5572521	LOC109427980	LOC5572521|AAEL009836	Down	-1.62543	0.120377	2.67394e-05
ISC/EB-prol	LOC110680525	LOC109431473	LOC110680525|AAEL011755	Down	-1.62927	0.104938	1.05264e-05
ISC/EB-prol	LOC5565774	LOC109415040	LOC5565774|AAEL004988	Down	-1.63103	0.0785699	5.56184e-06
ISC/EB-prol	LOC5573067	LOC109418575	LOC5573067|AAEL010248	Down	-1.6319	0.098746	1.96412e-07
ISC/EB-prol	LOC5566225	LOC109420225	LOC5566225|AAEL005259	Down	-1.70422	0.0772956	5.78431e-06
ISC/EB-prol	LOC5579467	LOC109402633	LOC5579467|AAEL023603	Down	-1.75674	0.0481234	4.14616e-06
ISC/EB-prol	LOC5575865	LOC109415571	LOC5575865|AAEL012135	Down	-1.7887	0.0708652	4.6294e-07
ISC/EB-prol	LOC5571093	LOC109419378	LOC5571093|AAEL008801	Down	-1.7972	0.0348108	1.53306e-05
ISC/EB-prol	LOC5571775	LOC109622423	LOC5571775|AAEL009291	Down	-1.81518	0.0682213	1.21257e-06
ISC/EB-prol	LOC5564242	LOC109622612	LOC5564242|AAEL004188	Down	-1.88051	0.131297	7.67702e-06
ISC/EB-prol	LOC5567964	LOC109407316	LOC5567964|AAEL006425	Down	-1.88437	0.0518636	2.31578e-07
ISC/EB-prol	LOC5565190	LOC109428515	LOC5565190|AAEL014749	Down	-1.88816	0.0952296	8.63718e-07
ISC/EB-prol	LOC23687632	LOC109420460	LOC23687632|AAEL017212	Down	-1.89323	0.0479118	4.27039e-05
ISC/EB-prol	LOC110678838	LOC109622212	LOC110678838|AAEL017258	Down	-1.91052	0.0616653	2.44664e-06
ISC/EB-prol	LOC5574977	LOC134285077	LOC5574977|AAEL002504	Down	-2.04244	0.0671371	1.04906e-06
ISC/EB-prol	LOC5570363	LOC109420406	LOC5570363|AAEL008278	Down	-2.05178	0.0827175	2.45674e-06
ISC/EB-prol	LOC5579094	LOC109409889	LOC5579094|AAEL003832	Down	-2.05835	0.139685	1.70442e-06
ISC/EB-prol	LOC5579338	LOC109427696	LOC5579338|AAEL025607	Down	-2.07188	0.0945404	4.10812e-08
ISC/EB-prol	LOC5565454	LOC109426036	LOC5565454|AAEL000647	Down	-2.15194	0.0894537	2.30376e-07
ISC/EB-prol	LOC5572651	LOC109420252	LOC5572651|AAEL001864	Down	-2.22398	0.0742532	2.21154e-07
ISC/EB-prol	LOC5572227	LOC109622208	LOC5572227|AAEL009661	Down	-2.30139	0.0872291	4.01198e-07
ISC/EB-prol	LOC5570663	LOC109409075	LOC5570663|AAEL008489	Down	-2.30284	0.0880654	1.39597e-07
ISC/EB-prol	LOC110678949	LOC115261471	LOC110678949|AAEL022104	Down	-2.60662	0.0256894	9.23328e-09
ISC/EB-prol	LOC5569847	LOC109417693	LOC5569847|AAEL007962	Down	-2.60988	0.066059	2.17707e-10
ISC/EB-prol	LOC5568046	LOC109421710	LOC5568046|AAEL006483	Down	-2.88348	0.0421747	3.97334e-07
ISC/EB-prol	LOC110680939	LOC109416926	LOC110680939|AAEL004175	Down	-3.12229	0.0281817	1.0787e-09
ISC/EB-prol	LOC110680755	LOC109431645	LOC110680755|AAEL011758	Down	-3.15663	0.0391363	2.12115e-07
ISC/EB-prol	LOC5572798	LOC134287653	LOC5572798|AAEL001913	Down	-3.44743	0.0831492	3.78523e-08
Cardia-1	LOC5565624	LOC109407944	LOC5565624|AAEL014292	Up	3.13827	0.115126	2.49472e-06
Cardia-1	LOC5577568	LOC109417825	LOC5577568|AAEL013279	Up	3.0568	0.178951	1.81515e-05
Cardia-1	LOC110676279	LOC115261752	LOC110676279|AAEL021140	Up	2.95858	0.127215	7.27755e-06
Cardia-1	LOC5572257	LOC115258128	LOC5572257|AAEL009680	Up	2.53173	0.115171	4.16501e-06
Cardia-1	LOC5565474	LOC115263538	LOC5565474|AAEL002495	Up	2.5077	0.123115	5.19938e-07
Cardia-1	LOC5579041	LOC109402894	LOC5579041|AAEL013989	Up	2.39605	0.188293	3.53713e-06
Cardia-1	LOC5573994	LOC109425666	LOC5573994|AAEL010843	Up	2.34952	0.170993	4.27763e-05
Cardia-1	LOC5564236	LOC109403759	LOC5564236|AAEL020849	Up	2.30873	0.230983	5.09126e-06
Cardia-1	LOC5568503	LOC109431912	LOC5568503|AAEL006922	Up	2.0136	0.154198	2.42224e-05
Cardia-1	LOC5570653	LOC109427522	LOC5570653|AAEL008461	Up	2.00581	0.20168	5.03604e-05
Cardia-1	LOC5571828	LOC109426670	LOC5571828|AAEL001690	Up	1.95637	0.182963	3.65974e-05
Cardia-1	LOC5576124	LOC115259220	LOC5576124|AAEL002811	Up	1.94794	0.16831	8.2071e-06
Cardia-1	LOC5576744	LOC109407728	LOC5576744|AAEL024536	Up	1.93777	0.0549602	4.40492e-07
Cardia-1	LOC5569529	LOC109411702	LOC5569529|AAEL007699	Up	1.84557	0.0550544	3.41562e-07
Cardia-1	LOC5564874	LOC134291440	LOC5564874|AAEL004460	Up	1.82122	0.177693	7.18348e-05
Cardia-1	LOC5568246	LOC109405896	LOC5568246|AAEL006685	Up	1.8191	0.183809	2.99588e-05
Cardia-1	LOC5579505	LOC134287966	LOC5579505|AAEL015136	Up	1.8085	0.185371	1.573e-05
Cardia-1	LOC5564516	LOC109623132	LOC5564516|AAEL004284	Up	1.78791	0.118131	1.16101e-05
Cardia-1	LOC5579101	LOC109399110	LOC5579101|AAEL003842	Up	1.77678	0.148088	6.70243e-06
Cardia-1	LOC5574240	LOC109416944	LOC5574240|AAEL011007	Up	1.73223	0.152325	3.30133e-05
Cardia-1	LOC5571685	LOC109418122	LOC5571685|AAEL009214	Up	1.52588	0.0879031	3.17841e-06
Cardia-1	LOC5567743	LOC109397492	LOC5567743|AAEL021429	Up	1.48268	0.120575	6.04609e-06
Cardia-1	LOC5564978	LOC109622815	LOC5564978|AAEL004534	Up	1.44133	0.224023	0.000199801
Cardia-1	LOC5568477	LOC109423337	LOC5568477|AAEL006883	Up	1.43504	0.258481	0.000359288
Cardia-1	LOC5565453	LOC109426035	LOC5565453|AAEL000667	Up	1.4347	0.129412	2.36434e-05
Cardia-1	LOC5574087	LOC109623116	LOC5574087|AAEL002257	Up	1.36268	0.150087	0.000193492
Cardia-1	LOC5569750	LOC109404691	LOC5569750|AAEL007915	Up	1.35971	0.211948	7.61244e-05
Cardia-1	LOC5570020	LOC134289877	LOC5570020|AAEL000182	Up	1.35259	0.171046	3.73384e-05
Cardia-1	LOC5567950	LOC115264694	LOC5567950|AAEL006390	Up	1.33637	0.157802	6.32059e-05
Cardia-1	LOC5566353	LOC109411286	LOC5566353|AAEL005336	Up	1.33031	0.239856	0.000162288
Cardia-1	LOC5569780	LOC109424680	LOC5569780|AAEL007926	Up	1.3145	0.209371	0.000183178
Cardia-1	LOC5572023	LOC109424954	LOC5572023|AAEL000219	Up	1.30956	0.140189	4.86169e-05
Cardia-1	LOC5572735	LOC109621585	LOC5572735|AAEL010012	Up	1.30911	0.147521	0.000104012
Cardia-1	LOC5566864	LOC109408984	LOC5566864|AAEL000847	Up	1.30316	0.164636	5.03779e-05
Cardia-1	LOC5579190	LOC109414512	LOC5579190|AAEL003899	Up	1.29406	0.22899	0.000267908
Cardia-1	LOC5564337	LOC115263581	LOC5564337|nan	Up	1.27328	0.0849526	9.25329e-06
Cardia-1	LOC5564012	LOC109402079	LOC5564012|AAEL014275	Up	1.27284	0.150934	3.70374e-05
Cardia-1	LOC5566316	LOC109397407	LOC5566316|AAEL005305	Up	1.26396	0.218134	0.000219568
Cardia-1	LOC5569566	LOC109422035	LOC5569566|AAEL007752	Up	1.25022	0.077299	2.23379e-05
Cardia-1	LOC5564161	LOC109407834	LOC5564161|AAEL004148	Up	1.18614	0.156929	5.01581e-05
Cardia-1	LOC5573116	LOC109421511	LOC5573116|AAEL002031	Up	1.1789	0.225863	0.00025738
Cardia-1	LOC5579654	LOC109424429	LOC5579654|AAEL003970	Up	1.17017	0.192618	0.000189162
Cardia-1	LOC5564749	LOC109426416	LOC5564749|AAEL014609	Up	1.16349	0.198345	0.00015042
Cardia-1	LOC5573287	LOC109408691	LOC5573287|AAEL010366	Up	1.12424	0.207194	0.00031067
Cardia-1	LOC5579964	LOC109417417	LOC5579964|AAEL007595	Up	1.1239	0.222616	0.000156052
Cardia-1	LOC5570090	LOC109418954	LOC5570090|AAEL001356	Up	1.11904	0.236504	0.000435358
Cardia-1	LOC5573374	LOC109430715	LOC5573374|AAEL010464	Up	1.11058	0.153688	6.23655e-05
Cardia-1	LOC5579871	LOC109404752	LOC5579871|AAEL005985	Up	1.08362	0.19109	0.000110062
Cardia-1	LOC5567222	LOC109432289	LOC5567222|AAEL019724	Up	1.07804	0.208451	0.000509284
Cardia-1	LOC5575683	LOC109409336	LOC5575683|AAEL011989	Up	1.06315	0.189883	0.000222761
Cardia-1	LOC5570050	LOC109399541	LOC5570050|AAEL000185	Up	1.04813	0.142113	0.000124353
Cardia-1	LOC5571039	LOC115263355	LOC5571039|AAEL008784	Up	1.04645	0.194339	0.000308998
Cardia-1	LOC5571854	LOC109404804	LOC5571854|AAEL009345	Up	1.04131	0.178739	0.000269577
Cardia-1	LOC5570312	LOC115257197	LOC5570312|AAEL008249	Up	1.03715	0.218435	0.000477459
Cardia-1	LOC5575108	LOC109428025	LOC5575108|AAEL011665	Up	1.02662	0.227373	0.000490455
Cardia-1	LOC5564130	LOC109407629	LOC5564130|AAEL004102	Up	1.02429	0.232615	0.000427281
Cardia-1	LOC5572931	LOC109432900	LOC5572931|AAEL010145	Up	1.01975	0.161972	9.41673e-05
Cardia-1	LOC5568127	LOC109397944	LOC5568127|AAEL006550	Up	0.978705	0.272692	0.00158783
[truncated: 8,899 more rows]

## Sheet: aae_vs_cxpip
Cluster	Ae. aegypti	Cx. p. pallens (Ctrl)	NCBI|VectorBase ID of Ae. aegypti orthologs	Regulation	de_coef	de_se	de_pval
ISC/EB-1	LOC5567341	LOC120419075	LOC5567341|AAEL006011	Up	4.7961	0.11872	4.85871e-07
ISC/EB-1	LOC5565962	LOC120419715	LOC5565962|AAEL005220	Up	3.53151	0.0780039	3.29137e-07
ISC/EB-1	LOC5577316	LOC120423507	LOC5577316|AAEL013163	Up	2.09485	0.121285	8.44062e-06
ISC/EB-1	LOC5565701	LOC120423165	LOC5565701|AAEL014944	Up	2.09446	0.075478	3.23893e-06
ISC/EB-1	LOC5572672	LOC120414107	LOC5572672|AAEL001852	Up	2.07942	0.0886757	1.01179e-06
ISC/EB-1	LOC5577042	LOC120432214	LOC5577042|AAEL012964	Up	2.06731	0.0603026	1.45724e-07
ISC/EB-1	LOC5564798	LOC120424117	LOC5564798|AAEL004423	Up	2.06639	0.0836791	7.27777e-07
ISC/EB-1	LOC5572372	LOC120422041	LOC5572372|AAEL009760	Up	2.04862	0.0996789	5.58041e-06
ISC/EB-1	LOC5568403	LOC120424292	LOC5568403|AAEL006820	Up	1.9545	0.0719081	7.39481e-07
ISC/EB-1	LOC5566079	LOC120427658	LOC5566079|AAEL015064	Up	1.91867	0.0838622	9.93685e-06
ISC/EB-1	LOC110677764	LOC120431023	LOC110677764|AAEL024434	Up	1.89498	0.0233085	3.09136e-07
ISC/EB-1	LOC5569950	LOC120419112	LOC5569950|AAEL008039	Up	1.85036	0.0900679	1.22763e-08
ISC/EB-1	LOC5573583	LOC120421698	LOC5573583|AAEL002130	Up	1.80988	0.0926923	8.30572e-06
ISC/EB-1	LOC5566800	LOC120419835	LOC5566800|AAEL005651	Up	1.79869	0.103936	7.92124e-06
ISC/EB-1	LOC110678949	LOC120426530	LOC110678949|AAEL022104	Up	1.77926	0.0946835	4.33046e-06
ISC/EB-1	LOC5579041	LOC120420837	LOC5579041|AAEL013989	Up	1.77404	0.110585	2.19135e-07
ISC/EB-1	LOC5565108	LOC120414203	LOC5565108|AAEL004586	Up	1.70163	0.117927	9.15117e-06
ISC/EB-1	LOC5567769	LOC120422152	LOC5567769|AAEL000102	Up	1.65109	0.107098	8.49803e-06
ISC/EB-1	LOC5578146	LOC120427119	LOC5578146|AAEL013527	Up	1.64846	0.113074	1.57551e-06
ISC/EB-1	LOC5575301	LOC120413747	LOC5575301|AAEL023523	Up	1.64619	0.127027	6.37666e-07
ISC/EB-1	LOC5576348	LOC120427411	LOC5576348|AAEL002861	Up	1.64213	0.103503	3.92352e-06
ISC/EB-1	LOC5564921	LOC120423393	LOC5564921|AAEL004500	Up	1.58145	0.0374114	2.67331e-05
ISC/EB-1	LOC5567097	LOC120418112	LOC5567097|AAEL005839	Up	1.57184	0.126138	1.12537e-05
ISC/EB-1	LOC5568076	LOC120417295	LOC5568076|AAEL006520	Up	1.48112	0.112897	8.41937e-06
ISC/EB-1	LOC5564781	LOC120423155	LOC5564781|AAEL004419	Up	1.44621	0.112571	3.27816e-06
ISC/EB-1	LOC5576215	LOC120416753	LOC5576215|AAEL002832	Up	1.43751	0.0197292	1.57665e-08
ISC/EB-1	LOC23687735	LOC120425958	LOC23687735|AAEL017315	Up	1.43737	0.10375	1.44176e-06
ISC/EB-1	LOC5564056	LOC120419865	LOC5564056|AAEL004059	Up	1.4119	0.0603971	2.44858e-06
ISC/EB-1	LOC5566316	LOC128092282	LOC5566316|AAEL005305	Up	1.40641	0.105062	0.000378669
ISC/EB-1	LOC5574614	LOC120414264	LOC5574614|AAEL011248	Up	1.40064	0.134545	1.08647e-05
ISC/EB-1	LOC5579186	LOC120415419	LOC5579186|AAEL003872	Up	1.37435	0.0258367	1.17562e-07
ISC/EB-1	LOC5572257	LOC120421359	LOC5572257|AAEL009680	Up	1.36918	0.218019	5.24799e-05
ISC/EB-1	LOC5568292	LOC120430316	LOC5568292|AAEL006721	Up	1.35515	0.115155	5.8696e-06
ISC/EB-1	LOC110675610	LOC128093535	LOC110675610|AAEL026008	Up	1.34104	0.05056	8.52434e-05
ISC/EB-1	LOC5566824	LOC120414616	LOC5566824|AAEL022609	Up	1.32738	0.090669	2.13434e-06
ISC/EB-1	LOC5564126	LOC120423804	LOC5564126|nan	Up	1.32734	0.146122	6.90891e-05
ISC/EB-1	LOC5574667	LOC120413933	LOC5574667|AAEL011302	Up	1.3232	0.0721631	4.78822e-06
ISC/EB-1	LOC5566087	LOC120426437	LOC5566087|AAEL005165	Up	1.29533	0.0548047	3.5732e-06
ISC/EB-1	LOC5580070	LOC120414540	LOC5580070|AAEL002160	Up	1.29108	0.082962	4.23781e-06
ISC/EB-1	LOC5569590	LOC128092258	LOC5569590|AAEL001247	Up	1.28447	0.100819	1.20133e-05
ISC/EB-1	LOC5564925	LOC120423392	LOC5564925|AAEL019568	Up	1.27621	0.0403099	8.48277e-07
ISC/EB-1	LOC5579108	LOC120412335	LOC5579108|AAEL003844	Up	1.25835	0.11267	8.24747e-06
ISC/EB-1	LOC5579871	LOC120423012	LOC5579871|AAEL005985	Up	1.24729	0.105995	5.13554e-05
ISC/EB-1	LOC5565148	LOC120432052	LOC5565148|AAEL004620	Up	1.24471	0.116319	1.38504e-05
ISC/EB-1	LOC5577524	LOC120423846	LOC5577524|AAEL003203	Up	1.22253	0.0785411	4.43466e-06
ISC/EB-1	LOC5574458	LOC120420910	LOC5574458|AAEL011180	Up	1.19674	0.0498325	2.03336e-06
ISC/EB-1	LOC5580214	LOC120428645	LOC5580214|AAEL011918	Up	1.18057	0.136334	3.82817e-05
ISC/EB-1	LOC5576488	LOC120416247	LOC5576488|AAEL002900	Up	1.16412	0.123486	4.67121e-06
ISC/EB-1	LOC5568583	LOC120423682	LOC5568583|AAEL001113	Up	1.16296	0.143297	2.89867e-05
ISC/EB-1	LOC23687501	LOC120432248	LOC23687501|AAEL017081	Up	1.16165	0.0979479	3.14675e-06
ISC/EB-1	LOC5571319	LOC120419469	LOC5571319|AAEL008961	Up	1.13407	0.137705	2.71011e-05
ISC/EB-1	LOC110676279	LOC120415783	LOC110676279|AAEL021140	Up	1.12135	0.0503442	1.11959e-06
ISC/EB-1	LOC5569288	LOC120424188	LOC5569288|AAEL007547	Up	1.12088	0.122474	1.34434e-05
ISC/EB-1	LOC5568556	LOC120426571	LOC5568556|AAEL001126	Up	1.12057	0.140418	1.00973e-05
ISC/EB-1	LOC5580192	LOC120427397	LOC5580192|AAEL002551	Up	1.11058	0.115252	8.93868e-06
ISC/EB-1	LOC5573878	LOC120417877	LOC5573878|AAEL010799	Up	1.10526	0.161603	2.93904e-05
ISC/EB-1	LOC5579505	LOC120423540	LOC5579505|AAEL015136	Up	1.09811	0.155462	7.47452e-05
ISC/EB-1	LOC5570996	LOC120414919	LOC5570996|AAEL008723	Up	1.098	0.0997833	1.19979e-05
ISC/EB-1	LOC5573328	LOC120429164	LOC5573328|AAEL010411	Up	1.08272	0.0883584	6.04556e-06
ISC/EB-1	LOC5566233	LOC120430176	LOC5566233|AAEL005258	Up	1.07512	0.145733	0.000113669
ISC/EB-1	LOC5572931	LOC120431162	LOC5572931|AAEL010145	Up	1.07149	0.084162	1.17188e-05
ISC/EB-1	LOC5571304	LOC120422058	LOC5571304|AAEL008953	Up	1.06603	0.0640345	9.40064e-07
ISC/EB-1	LOC5566864	LOC120421877	LOC5566864|AAEL000847	Up	1.04784	0.110602	7.3831e-06
ISC/EB-1	LOC5578311	LOC120413732	LOC5578311|AAEL008084	Up	1.04426	0.115236	0.00011167
ISC/EB-1	LOC5565670	LOC120416564	LOC5565670|AAEL014931	Up	1.03416	0.160589	0.000252711
ISC/EB-1	LOC5564769	LOC120423156	LOC5564769|AAEL004438	Up	1.03405	0.139513	1.97511e-05
ISC/EB-1	LOC5578378	LOC120422052	LOC5578378|AAEL013653	Up	1.02984	0.150608	0.000180187
ISC/EB-1	LOC5575813	LOC120414018	LOC5575813|AAEL012069	Up	1.02069	0.105488	3.97637e-05
ISC/EB-1	LOC5576764	LOC120415884	LOC5576764|AAEL012750	Up	1.01897	0.119033	3.82194e-05
ISC/EB-1	LOC5574966	LOC120416916	LOC5574966|AAEL002527	Up	1.01707	0.0705607	1.17166e-06
ISC/EB-1	LOC5576104	LOC120417444	LOC5576104|AAEL002777	Up	1.0099	0.145752	4.31507e-05
ISC/EB-1	LOC5573319	LOC120422563	LOC5573319|AAEL010403	Up	0.981638	0.139866	3.59616e-06
ISC/EB-1	LOC5568046	LOC120416155	LOC5568046|AAEL006483	Up	0.965232	0.101294	1.25978e-05
ISC/EB-1	LOC5564072	LOC120425024	LOC5564072|AAEL004067	Up	0.951307	0.106659	1.56454e-05
ISC/EB-1	LOC5565922	LOC120412468	LOC5565922|AAEL000709	Up	0.950343	0.150064	2.17367e-05
ISC/EB-1	LOC5574214	LOC120424647	LOC5574214|AAEL024525	Up	0.944491	0.153322	0.000127062
ISC/EB-1	LOC5576765	LOC120415355	LOC5576765|AAEL012746	Up	0.933108	0.0918616	4.42934e-05
ISC/EB-1	LOC5572255	LOC120421354	LOC5572255|AAEL009681	Up	0.930428	0.122208	0.000133659
ISC/EB-1	LOC5567160	LOC120422268	LOC5567160|AAEL005910	Up	0.919821	0.143729	6.40632e-05
ISC/EB-1	LOC5567964	LOC120422404	LOC5567964|AAEL006425	Up	0.909792	0.087474	1.67627e-05
ISC/EB-1	LOC5565405	LOC120413220	LOC5565405|AAEL014843	Up	0.90633	0.0632126	2.7139e-06
ISC/EB-1	LOC5578684	LOC120423295	LOC5578684|AAEL003645	Up	0.906132	0.0701339	1.14022e-05
ISC/EB-1	LOC5577268	LOC120424487	LOC5577268|AAEL013128	Up	0.895079	0.11665	4.29581e-05
ISC/EB-1	LOC5574197	LOC120422673	LOC5574197|AAEL002296	Up	0.891032	0.149065	0.000130912
ISC/EB-1	LOC5573260	LOC120424703	LOC5573260|AAEL010359	Up	0.890933	0.130894	2.82363e-06
ISC/EB-1	LOC5564792	LOC120423151	LOC5564792|AAEL004445	Up	0.874947	0.134134	8.06685e-05
ISC/EB-1	LOC5579902	LOC120429898	LOC5579902|AAEL001044	Up	0.868623	0.142113	9.79553e-05
ISC/EB-1	LOC5566687	LOC120423891	LOC5566687|AAEL005558	Up	0.866602	0.0669444	8.95384e-06
ISC/EB-1	LOC5579853	LOC120414981	LOC5579853|AAEL005845	Up	0.866543	0.109401	1.05714e-05
ISC/EB-1	LOC5576472	LOC120414167	LOC5576472|AAEL002886	Up	0.862289	0.0713772	1.33963e-05
ISC/EB-1	LOC5574731	LOC120421103	LOC5574731|AAEL011371	Up	0.859129	0.0957571	3.1267e-05
ISC/EB-1	LOC5565048	LOC120425481	LOC5565048|AAEL004567	Up	0.851803	0.0933257	7.8888e-05
ISC/EB-1	LOC5574240	LOC120419546	LOC5574240|AAEL011007	Up	0.84826	0.138755	9.71087e-05
ISC/EB-1	LOC5571932	LOC120423256	LOC5571932|AAEL009387	Up	0.847644	0.110804	5.3792e-05
ISC/EB-1	LOC5568114	LOC120422882	LOC5568114|AAEL006551	Up	0.846768	0.153617	0.000199407
ISC/EB-1	LOC5565253	LOC120413206	LOC5565253|AAEL004688	Up	0.829126	0.141652	9.49126e-05
ISC/EB-1	LOC5569750	LOC120418133	LOC5569750|AAEL007915	Up	0.817932	0.0791811	1.32328e-05
ISC/EB-1	LOC110678029	LOC120428187	LOC110678029|AAEL021557	Up	0.816702	0.166207	0.000287822
ISC/EB-1	LOC5578307	LOC120417695	LOC5578307|AAEL013628	Up	0.809059	0.11751	0.000134744
ISC/EB-1	LOC5571208	LOC120418156	LOC5571208|AAEL008893	Up	0.802859	0.109854	5.10101e-05
ISC/EB-1	LOC5578734	LOC120416977	LOC5578734|AAEL003661	Up	0.79465	0.0956288	5.12548e-05
ISC/EB-1	LOC5572335	LOC120427148	LOC5572335|AAEL009719	Up	0.782971	0.138857	9.01887e-05
ISC/EB-1	LOC5569936	LOC120422532	LOC5569936|AAEL008025	Up	0.781331	0.142003	0.000308598
ISC/EB-1	LOC5574912	LOC120428619	LOC5574912|AAEL002748	Up	0.770051	0.138181	0.00015254
ISC/EB-1	LOC5575108	LOC120427997	LOC5575108|AAEL011665	Up	0.763495	0.121221	0.0001859
ISC/EB-1	LOC5568418	LOC120423196	LOC5568418|AAEL006847	Up	0.752415	0.14712	0.000146039
ISC/EB-1	LOC5570050	LOC120416623	LOC5570050|AAEL000185	Up	0.752114	0.0720695	1.42127e-05
ISC/EB-1	LOC110679353	LOC120421446	LOC110679353|AAEL025697	Up	0.751912	0.0862818	2.38285e-05
ISC/EB-1	LOC5573374	LOC120425993	LOC5573374|AAEL010464	Up	0.746073	0.080787	2.68584e-05
ISC/EB-1	LOC5568658	LOC120423439	LOC5568658|AAEL007001	Up	0.744776	0.131678	0.000117283
ISC/EB-1	LOC5574701	LOC120432583	LOC5574701|AAEL027910	Up	0.743618	0.109546	9.70869e-05
ISC/EB-1	LOC110678983	LOC120414391	LOC110678983|AAEL025807	Up	0.73994	0.148208	0.000265088
ISC/EB-1	LOC5572753	LOC120424863	LOC5572753|AAEL010018	Up	0.737276	0.0691836	4.45162e-05
ISC/EB-1	LOC5573217	LOC120428260	LOC5573217|AAEL010299	Up	0.724671	0.0203052	2.7933e-05
ISC/EB-1	LOC5575831	LOC120432217	LOC5575831|AAEL012099	Up	0.718393	0.0759876	2.26317e-05
ISC/EB-1	LOC5571930	LOC120415845	LOC5571930|AAEL009389	Up	0.709218	0.0782915	3.83293e-05
ISC/EB-1	LOC5578625	LOC120417714	LOC5578625|AAEL003582	Up	0.70512	0.0218874	1.07637e-07
ISC/EB-1	LOC5568436	LOC120417806	LOC5568436|AAEL012661	Up	0.700983	0.0546585	2.01806e-06
ISC/EB-1	LOC5575848	LOC120412505	LOC5575848|AAEL012113	Up	0.700129	0.0828004	2.21483e-06
ISC/EB-1	LOC5579183	LOC120413678	LOC5579183|AAEL003901	Up	0.697431	0.134042	0.000154592
ISC/EB-1	LOC5579187	LOC120415396	LOC5579187|AAEL003873	Up	0.693468	0.146203	0.00025698
ISC/EB-1	LOC5568319	LOC120430112	LOC5568319|AAEL006727	Up	0.682747	0.166868	0.00125816
ISC/EB-1	LOC5570080	LOC120417658	LOC5570080|AAEL001336	Up	0.682577	0.115397	6.12886e-05
ISC/EB-1	LOC5571645	LOC120428542	LOC5571645|AAEL001636	Up	0.679483	0.13674	0.000223327
ISC/EB-1	LOC5573069	LOC120414865	LOC5573069|AAEL010256	Up	0.677169	0.166458	0.000985342
ISC/EB-1	LOC110676235	LOC120424477	LOC110676235|AAEL022750	Up	0.67088	0.158686	0.000370995
ISC/EB-1	LOC5571825	LOC120429259	LOC5571825|AAEL001698	Up	0.669939	0.106112	7.15033e-05
ISC/EB-1	LOC5573994	LOC120413458	LOC5573994|AAEL010843	Up	0.668243	0.0503338	0.000375721
ISC/EB-1	LOC5573370	LOC120425999	LOC5573370|AAEL010470	Up	0.665424	0.122349	0.000201342
ISC/EB-1	LOC5574739	LOC120421108	LOC5574739|AAEL011369	Up	0.661331	0.117395	0.000232384
ISC/EB-1	LOC5573038	LOC120414164	LOC5573038|AAEL025993	Up	0.649375	0.140193	0.000371064
ISC/EB-1	LOC5575822	LOC120430654	LOC5575822|AAEL012092	Up	0.644983	0.143006	0.000519918
ISC/EB-1	LOC5566229	LOC120422061	LOC5566229|AAEL005271	Up	0.638969	0.166216	0.000970035
ISC/EB-1	LOC5564525	LOC120412679	LOC5564525|AAEL014492	Up	0.635635	0.140244	0.000352219
ISC/EB-1	LOC5568302	LOC120430349	LOC5568302|AAEL006741	Up	0.634373	0.0712979	6.67824e-05
ISC/EB-1	LOC5576841	LOC120426686	LOC5576841|AAEL012827	Up	0.633406	0.0865095	3.92003e-05
ISC/EB-1	LOC5567207	LOC120415371	LOC5567207|AAEL000902	Up	0.632708	0.150489	0.00087513
ISC/EB-1	LOC110679868	LOC120422549	LOC110679868|AAEL027050	Up	0.618143	0.0949808	4.49612e-05
ISC/EB-1	LOC5570318	LOC120414302	LOC5570318|AAEL008257	Up	0.614414	0.0808196	2.33691e-05
ISC/EB-1	LOC5572466	LOC120416783	LOC5572466|AAEL001832	Up	0.608524	0.180742	0.00198334
ISC/EB-1	LOC5565854	LOC120432423	LOC5565854|AAEL005037	Up	0.598255	0.161049	0.000879339
ISC/EB-1	LOC5563706	LOC120423968	LOC5563706|AAEL003921	Up	0.594835	0.17614	0.00256308
ISC/EB-1	LOC5572534	LOC120416051	LOC5572534|AAEL009859	Up	0.594554	0.0391393	0.000150524
ISC/EB-1	LOC5564392	LOC120414529	LOC5564392|AAEL004234	Up	0.593353	0.084945	8.48839e-05
ISC/EB-1	LOC5567528	LOC120414438	LOC5567528|AAEL006129	Up	0.590719	0.128065	0.000383235
ISC/EB-1	LOC5567073	LOC120426741	LOC5567073|AAEL005796	Up	0.589242	0.167745	0.00151747
ISC/EB-1	LOC5577697	LOC120429673	LOC5577697|AAEL013334	Up	0.588365	0.164225	0.00146713
ISC/EB-1	LOC5580280	LOC120415004	LOC5580280|AAEL003006	Up	0.582159	0.105067	0.000309329
ISC/EB-1	LOC5566143	LOC120428073	LOC5566143|AAEL005213	Up	0.576578	0.0697166	6.62435e-05
ISC/EB-1	LOC5565624	LOC120418490	LOC5565624|AAEL014292	Up	0.574828	0.0221345	1.51976e-07
ISC/EB-1	LOC5569529	LOC120419037	LOC5569529|AAEL007699	Up	0.57374	0.0211448	0.00010476
ISC/EB-1	LOC5577406	LOC120427175	LOC5577406|AAEL003179	Up	0.572368	0.129569	0.000615635
ISC/EB-1	LOC5573266	LOC120424718	LOC5573266|AAEL019802	Up	0.568392	0.155318	0.00152471
ISC/EB-1	LOC5568659	LOC120423429	LOC5568659|AAEL007019	Up	0.56477	0.0813107	2.4691e-05
ISC/EB-1	LOC5569143	LOC120429098	LOC5569143|AAEL007403	Up	0.564183	0.15102	0.00157147
ISC/EB-1	LOC5564011	LOC120418035	LOC5564011|AAEL014272	Up	0.558036	0.100887	0.00020034
ISC/EB-1	LOC5570244	LOC120425218	LOC5570244|AAEL008188	Up	0.55708	0.0199869	2.624e-07
ISC/EB-1	LOC5578243	LOC120416092	LOC5578243|AAEL015006	Up	0.551311	0.0194458	0.000100783
ISC/EB-1	LOC5568166	LOC120418691	LOC5568166|AAEL006609	Up	0.544054	0.136649	0.000812795
ISC/EB-1	LOC5567961	LOC120422417	LOC5567961|AAEL006420	Up	0.543683	0.143176	0.000760019
ISC/EB-1	LOC5570678	LOC120417840	LOC5570678|AAEL008473	Up	0.543246	0.10514	0.000102719
ISC/EB-1	LOC5578927	LOC120430499	LOC5578927|AAEL003750	Up	0.53194	0.0414029	1.1014e-05
ISC/EB-1	LOC5572049	LOC120422162	LOC5572049|AAEL000245	Up	0.530936	0.157737	0.00147901
ISC/EB-1	LOC5578918	LOC120431826	LOC5578918|AAEL003758	Up	0.51972	0.175964	0.00319936
ISC/EB-1	LOC5572365	LOC120427769	LOC5572365|AAEL009747	Up	0.517221	0.0230589	3.90327e-08
ISC/EB-1	LOC110676045	LOC120424862	LOC110676045|AAEL022286	Up	0.516607	0.0209057	2.10549e-05
ISC/EB-1	LOC5578293	LOC120427315	LOC5578293|AAEL022819	Up	0.513169	0.108972	0.000258197
ISC/EB-1	LOC5566608	LOC120420438	LOC5566608|AAEL000791	Up	0.513135	0.15098	0.00255992
ISC/EB-1	LOC5569899	LOC120431634	LOC5569899|AAEL007990	Up	0.511066	0.138748	0.00108669
ISC/EB-1	LOC5574542	LOC120418667	LOC5574542|AAEL011216	Up	0.50786	0.126276	0.000943139
ISC/EB-1	LOC110674836	LOC120430936	LOC110674836|AAEL020033	Up	0.506966	0.181647	0.00559888
ISC/EB-1	LOC5569604	LOC120418532	LOC5569604|AAEL001275	Up	0.505597	0.110903	0.000319477
ISC/EB-1	LOC5572195	LOC120413403	LOC5572195|AAEL014715	Up	0.502714	0.0650759	3.82398e-05
ISC/EB-1	LOC5566751	LOC120413336	LOC5566751|AAEL015238	Up	0.501627	0.0990771	0.00025219
ISC/EB-1	LOC5569222	LOC120431628	LOC5569222|AAEL007494	Up	0.500967	0.115905	0.000286087
ISC/EB-1	LOC5569181	LOC120417348	LOC5569181|AAEL007441	Up	0.496228	0.0917123	0.000173699
ISC/EB-1	LOC5578090	LOC120416817	LOC5578090|AAEL003415	Up	0.495789	0.101847	0.000242891
ISC/EB-1	LOC5568498	LOC120413065	LOC5568498|AAEL006912	Up	0.495089	0.150546	0.00272947
ISC/EB-1	LOC5573750	LOC120415269	LOC5573750|AAEL000275	Up	0.494528	0.165786	0.00319936
ISC/EB-1	LOC5571571	LOC120417779	LOC5571571|AAEL009160	Up	0.493562	0.0751159	1.80708e-05
ISC/EB-1	LOC5573872	LOC120418758	LOC5573872|AAEL010787	Up	0.480985	0.0317958	5.92098e-06
ISC/EB-1	LOC5573418	LOC120418020	LOC5573418|AAEL002083	Up	0.477753	0.0492816	5.6859e-05
ISC/EB-1	LOC5579109	LOC120432671	LOC5579109|AAEL003829	Up	0.476161	0.175548	0.0059988
ISC/EB-1	LOC5580074	LOC120429017	LOC5580074|AAEL002178	Up	0.474448	0.150585	0.0029994
ISC/EB-1	LOC5570913	LOC120422992	LOC5570913|AAEL001484	Up	0.471758	0.105459	0.000407911
ISC/EB-1	LOC5570916	LOC120422983	LOC5570916|AAEL001501	Up	0.463004	0.161473	0.00559888
ISC/EB-1	LOC5564956	LOC120412427	LOC5564956|AAEL024396	Up	0.461713	0.169214	0.00639872
ISC/EB-1	LOC5572316	LOC120417902	LOC5572316|AAEL009708	Up	0.461097	0.180616	0.0123975
ISC/EB-1	LOC5571141	LOC120426507	LOC5571141|AAEL019603	Up	0.460205	0.17407	0.00979804
ISC/EB-1	LOC110678484	LOC120421481	LOC110678484|AAEL025246	Up	0.458394	0.166584	0.00439912
ISC/EB-1	LOC5568570	LOC120426559	LOC5568570|AAEL001141	Up	0.45306	0.160267	0.00539892
ISC/EB-1	LOC5564399	LOC120417697	LOC5564399|AAEL004227	Up	0.452912	0.154292	0.0039992
ISC/EB-1	LOC5569782	LOC120415125	LOC5569782|AAEL007920	Up	0.449153	0.123989	0.00102323
ISC/EB-1	LOC5571387	LOC120413162	LOC5571387|AAEL009026	Up	0.448438	0.0847435	0.000128146
ISC/EB-1	LOC5567836	LOC120427265	LOC5567836|AAEL001009	Up	0.447072	0.13689	0.00288868
ISC/EB-1	LOC5566684	LOC120414339	LOC5566684|AAEL005567	Up	0.445462	0.0732616	0.000107159
ISC/EB-1	LOC5570432	LOC120414102	LOC5570432|AAEL008329	Up	0.445085	0.0221866	1.37819e-06
ISC/EB-1	LOC5568481	LOC120419503	LOC5568481|AAEL006879	Up	0.442542	0.114239	0.000991528
ISC/EB-1	LOC110678734	LOC120419254	LOC110678734|AAEL019403	Up	0.440682	0.0248849	0.000121722
ISC/EB-1	LOC5570017	LOC120419562	LOC5570017|AAEL000208	Up	0.438023	0.131963	0.00213678
ISC/EB-1	LOC5571564	LOC120425318	LOC5571564|AAEL009151	Up	0.436784	0.0198635	2.29858e-06
ISC/EB-1	LOC5571506	LOC120419905	LOC5571506|AAEL019988	Up	0.43655	0.115015	0.0013167
ISC/EB-1	LOC5563904	LOC128093113	LOC5563904|AAEL003993	Up	0.435972	0.112336	0.00100581
ISC/EB-1	LOC5574369	LOC120425451	LOC5574369|AAEL011087	Up	0.430725	0.183139	0.0225955
ISC/EB-1	LOC5570433	LOC120414100	LOC5570433|AAEL019748	Up	0.430088	0.110208	0.000989925
ISC/EB-1	LOC5571006	LOC120414905	LOC5571006|AAEL008738	Up	0.425611	0.0825543	0.000187211
ISC/EB-1	LOC5570254	LOC120428394	LOC5570254|AAEL008210	Up	0.4242	0.165715	0.00979804
ISC/EB-1	LOC5575706	LOC120412615	LOC5575706|AAEL012014	Up	0.423976	0.123677	0.00176833
ISC/EB-1	LOC5569547	LOC120417564	LOC5569547|AAEL007718	Up	0.421889	0.0760164	0.00164559
ISC/EB-1	LOC5573751	LOC120415314	LOC5573751|AAEL000294	Up	0.421568	0.0962147	0.000495481
ISC/EB-1	LOC5564972	LOC120420891	LOC5564972|AAEL004523	Up	0.417589	0.138049	0.00339932
ISC/EB-1	LOC5566301	LOC120430231	LOC5566301|AAEL005293	Up	0.414031	0.0978519	0.000526102
ISC/EB-1	LOC5577996	LOC120432401	LOC5577996|AAEL003396	Up	0.413785	0.0189115	7.5812e-07
ISC/EB-1	LOC5572923	LOC120413536	LOC5572923|AAEL010146	Up	0.412111	0.114186	0.00124322
ISC/EB-1	LOC5564181	LOC120424392	LOC5564181|AAEL004131	Up	0.4104	0.198366	0.0329934
ISC/EB-1	LOC5573885	LOC120417871	LOC5573885|AAEL010798	Up	0.407466	0.0986853	0.000610984
ISC/EB-1	LOC5569144	LOC120429100	LOC5569144|AAEL007392	Up	0.406627	0.0772634	0.000110581
ISC/EB-1	LOC5573948	LOC120423108	LOC5573948|AAEL002183	Up	0.400608	0.0911649	0.000324975
ISC/EB-1	LOC5573763	LOC120428572	LOC5573763|AAEL000269	Up	0.400473	0.031165	1.16182e-05
ISC/EB-1	LOC5572463	LOC120416771	LOC5572463|AAEL001798	Up	0.397971	0.112956	0.00143776
ISC/EB-1	LOC5567839	LOC120427249	LOC5567839|AAEL001005	Up	0.397151	0.0751877	0.00025409
ISC/EB-1	LOC5567037	LOC120424516	LOC5567037|AAEL005790	Up	0.396223	0.145377	0.00719856
ISC/EB-1	LOC5567848	LOC120422997	LOC5567848|AAEL000987	Up	0.394749	0.0199609	4.81254e-07
ISC/EB-1	LOC5574592	LOC120423845	LOC5574592|AAEL002411	Up	0.392017	0.0674242	0.00022907
ISC/EB-1	LOC5570924	LOC120418288	LOC5570924|AAEL026751	Up	0.392013	0.0991838	0.000831116
ISC/EB-1	LOC5574348	LOC120423776	LOC5574348|AAEL002350	Up	0.390641	0.190619	0.034793
ISC/EB-1	LOC5570534	LOC120417422	LOC5570534|AAEL001421	Up	0.389021	0.104978	0.00129982
ISC/EB-1	LOC5578459	LOC120413998	LOC5578459|AAEL000486	Up	0.387336	0.0716894	0.000217474
ISC/EB-1	LOC5570877	LOC120421496	LOC5570877|AAEL008656	Up	0.386159	0.188677	0.0361928
ISC/EB-1	LOC5570218	LOC120414344	LOC5570218|AAEL008153	Up	0.385009	0.17125	0.0217956
ISC/EB-1	LOC5578753	LOC120420808	LOC5578753|AAEL003678	Up	0.384237	0.187748	0.0381924
ISC/EB-1	LOC5564012	LOC120418409	LOC5564012|AAEL014275	Up	0.372901	0.187916	0.0445911
ISC/EB-1	LOC110679583	LOC120421856	LOC110679583|AAEL023591	Up	0.358663	0.0931544	0.00118664
ISC/EB-1	LOC5565563	LOC120416488	LOC5565563|AAEL004832	Up	0.351881	0.169399	0.0361928
ISC/EB-1	LOC5576223	LOC120416757	LOC5576223|AAEL002825	Up	0.340517	0.106545	0.00294926
ISC/EB-1	LOC5577777	LOC120429256	LOC5577777|AAEL003285	Up	0.33932	0.103878	0.00172173
ISC/EB-1	LOC5572284	LOC120426782	LOC5572284|AAEL001759	Up	0.337357	0.0201119	4.7147e-05
ISC/EB-1	LOC5576097	LOC120417438	LOC5576097|AAEL002818	Up	0.337271	0.155838	0.0237952
ISC/EB-1	LOC5574665	LOC120413907	LOC5574665|AAEL011309	Up	0.327854	0.0726212	0.00215062
ISC/EB-1	LOC5572735	LOC120426738	LOC5572735|AAEL010012	Up	0.324066	0.0701538	0.000321469
ISC/EB-1	LOC5567684	LOC120416972	LOC5567684|AAEL006251	Up	0.323528	0.122586	0.00619876
ISC/EB-1	LOC5570914	LOC120422988	LOC5570914|AAEL001479	Up	0.319223	0.166618	0.0437912
ISC/EB-1	LOC5580058	LOC120414541	LOC5580058|AAEL002155	Up	0.31891	0.163692	0.0443911
ISC/EB-1	LOC5577985	LOC120425163	LOC5577985|AAEL013461	Up	0.316862	0.159265	0.039992
ISC/EB-1	LOC5570147	LOC120420952	LOC5570147|AAEL008128	Up	0.316197	0.132417	0.0143971
ISC/EB-1	LOC5574333	LOC120418548	LOC5574333|AAEL002337	Up	0.31155	0.109291	0.00479904
ISC/EB-1	LOC5572119	LOC120417987	LOC5572119|AAEL009539	Up	0.307909	0.11807	0.0089982
ISC/EB-1	LOC5569443	LOC120426030	LOC5569443|AAEL001232	Up	0.30762	0.152601	0.0329934
ISC/EB-1	LOC5574338	LOC120430340	LOC5574338|AAEL002334	Up	0.307577	0.0605392	0.000317867
ISC/EB-1	LOC5573473	LOC120415415	LOC5573473|AAEL010514	Up	0.305756	0.159226	0.0471906
ISC/EB-1	LOC5570932	LOC120414728	LOC5570932|AAEL008671	Up	0.300195	0.111612	0.0069986
ISC/EB-1	LOC5571854	LOC120422402	LOC5571854|AAEL009345	Up	0.298641	0.103419	0.00319936
ISC/EB-1	LOC5564117	LOC120428930	LOC5564117|AAEL019408	Up	0.295867	0.0782512	0.000617388
ISC/EB-1	LOC5578101	LOC120416824	LOC5578101|AAEL003418	Up	0.293006	0.113683	0.00819836
ISC/EB-1	LOC5574612	LOC120414286	LOC5574612|AAEL011255	Up	0.291367	0.0788039	0.00117453
ISC/EB-1	LOC5568502	LOC120413036	LOC5568502|AAEL019567	Up	0.291268	0.140293	0.034993
ISC/EB-1	LOC23687495	LOC120424480	LOC23687495|AAEL017075	Up	0.290699	0.0454767	3.1523e-05
ISC/EB-1	LOC5576896	LOC120423866	LOC5576896|AAEL003039	Up	0.289989	0.056675	0.000341543
ISC/EB-1	LOC5565878	LOC120426277	LOC5565878|AAEL000679	Up	0.289787	0.08093	0.00122627
ISC/EB-1	LOC5564556	LOC120430857	LOC5564556|AAEL004325	Up	0.28365	0.0242318	6.73924e-06
ISC/EB-1	LOC5567091	LOC120413181	LOC5567091|AAEL012313	Up	0.276239	0.104014	0.0059988
ISC/EB-1	LOC5573238	LOC120423501	LOC5573238|AAEL010330	Up	0.268175	0.131101	0.0393921
ISC/EB-1	LOC5569632	LOC120414826	LOC5569632|AAEL007777	Up	0.260943	0.106523	0.0137972
ISC/EB-1	LOC5574747	LOC120432327	LOC5574747|AAEL019990	Up	0.260072	0.131763	0.0443911
ISC/EB-1	LOC5573372	LOC120422557	LOC5573372|AAEL010467	Up	0.257922	0.100538	0.00919816
ISC/EB-1	LOC5565700	LOC120418286	LOC5565700|AAEL004930	Up	0.257733	0.106284	0.014997
ISC/EB-1	LOC5572725	LOC120430495	LOC5572725|AAEL009994	Up	0.256414	0.0273377	2.84543e-05
ISC/EB-1	LOC5564161	LOC120415677	LOC5564161|AAEL004148	Up	0.255662	0.0799963	0.00225283
ISC/EB-1	LOC5575037	LOC120415404	LOC5575037|AAEL011587	Up	0.253089	0.0218376	0.000332182
ISC/EB-1	LOC5580100	LOC120424456	LOC5580100|AAEL002140	Up	0.245055	0.119285	0.0323935
ISC/EB-1	LOC5570509	LOC120425582	LOC5570509|AAEL001432	Up	0.236492	0.0899537	0.0079984
ISC/EB-1	LOC110675611	LOC120428813	LOC110675611|AAEL026833	Up	0.234284	0.0696115	0.00204389
ISC/EB-1	LOC5567214	LOC120426729	LOC5567214|AAEL028205	Up	0.226497	0.0782422	0.0039992
ISC/EB-1	LOC5572843	LOC120425766	LOC5572843|AAEL010059	Up	0.223977	0.0684117	0.00164749
ISC/EB-1	LOC5563590	LOC120417150	LOC5563590|AAEL000032	Up	0.222801	0.0240371	3.3966e-05
ISC/EB-1	LOC5565979	LOC120423961	LOC5565979|AAEL005097	Up	0.218553	0.0221885	4.66354e-06
ISC/EB-1	LOC5568764	LOC120426100	LOC5568764|AAEL010704	Up	0.216145	0.105444	0.0361928
ISC/EB-1	LOC5565544	LOC120416489	LOC5565544|AAEL004855	Up	0.215319	0.0230626	2.93699e-06
ISC/EB-1	LOC5577712	LOC120424855	LOC5577712|nan	Up	0.197126	0.0823381	0.0163967
ISC/EB-1	LOC5566236	LOC120430366	LOC5566236|AAEL005269	Up	0.194492	0.0761334	0.00779844
ISC/EB-1	LOC5574648	LOC120412670	LOC5574648|AAEL011288	Up	0.187776	0.0365372	0.000123084
ISC/EB-1	LOC5578796	LOC120421723	LOC5578796|AAEL003675	Up	0.182065	0.0639849	0.00379924
ISC/EB-1	LOC5578857	LOC120427130	LOC5578857|AAEL027402	Up	0.17572	0.0700746	0.0105979
ISC/EB-1	LOC5574862	LOC120420361	LOC5574862|AAEL011468	Up	0.165055	0.0727956	0.0159968
ISC/EB-1	LOC5568090	LOC120417310	LOC5568090|AAEL006511	Up	0.163154	0.0180536	0.000488124
ISC/EB-1	LOC5575718	LOC120412961	LOC5575718|AAEL012035	Up	0.159663	0.0704494	0.0213957
ISC/EB-1	LOC5570007	LOC120419573	LOC5570007|AAEL000175	Up	0.157051	0.0774824	0.0433913
ISC/EB-1	LOC5575273	LOC120424427	LOC5575273|AAEL011742	Up	0.152047	0.0581426	0.0069986
ISC/EB-1	LOC5576744	LOC120417412	LOC5576744|AAEL024536	Up	0.140536	0.018682	0.000725295
ISC/EB-1	LOC5568784	LOC120419108	LOC5568784|AAEL007135	Up	0.137488	0.0721222	0.045191
ISC/EB-1	LOC5578123	LOC120416844	LOC5578123|AAEL003427	Up	0.132805	0.0186401	0.000407705
ISC/EB-1	LOC110676232	LOC120424488	LOC110676232|AAEL023983	Up	0.116507	0.0212623	7.51274e-05
ISC/EB-1	LOC110677919	LOC120415873	LOC110677919|AAEL020749	Up	0.0946538	0.0213723	0.00167746
ISC/EB-1	LOC5574167	LOC120418235	LOC5574167|AAEL010977	Up	0.0820802	0.0356366	0.0139972
ISC/EB-1	LOC5577566	LOC120421114	LOC5577566|AAEL013272	Up	0.0786525	0.0205857	0.000397125
ISC/EB-1	LOC5570243	LOC120425212	LOC5570243|AAEL008192	Up	0.0735632	0.0235711	0.00433845
ISC/EB-1	LOC5575105	LOC120427008	LOC5575105|AAEL011656	Up	0.0708102	0.0210747	0.00299601
ISC/EB-1	LOC5576758	LOC120422611	LOC5576758|AAEL025553	Down	-0.0503369	0.0204808	0.0371926
ISC/EB-1	LOC23687936	LOC120426907	LOC23687936|AAEL017516	Down	-0.0650073	0.0218777	0.00919816
ISC/EB-1	LOC5566843	LOC120413809	LOC5566843|AAEL000823	Down	-0.0706466	0.0202485	0.00250796
ISC/EB-1	LOC5573974	LOC120426083	LOC5573974|AAEL010821	Down	-0.0799358	0.0211774	0.00219507
ISC/EB-1	LOC5574844	LOC120418866	LOC5574844|AAEL011447	Down	-0.0933949	0.0192449	0.00164037
ISC/EB-1	LOC5580259	LOC120428359	LOC5580259|AAEL012585	Down	-0.109692	0.0209813	0.000272737
ISC/EB-1	LOC5577034	LOC120419418	LOC5577034|AAEL012944	Down	-0.117399	0.0190418	0.00137401
ISC/EB-1	LOC5573413	LOC120420232	LOC5573413|AAEL002047	Down	-0.128829	0.0205232	0.000205995
ISC/EB-1	LOC5566772	LOC120424308	LOC5566772|AAEL005629	Down	-0.137565	0.018798	7.99959e-05
ISC/EB-1	LOC5568465	LOC120416887	LOC5568465|AAEL006860	Down	-0.144709	0.0221248	0.000103443
ISC/EB-1	LOC5577289	LOC120427031	LOC5577289|AAEL013139	Down	-0.14922	0.0586468	0.0143971
ISC/EB-1	LOC5566059	LOC120425962	LOC5566059|AAEL005143	Down	-0.163931	0.0721617	0.0235953
ISC/EB-1	LOC5565541	LOC120430782	LOC5565541|AAEL004829	Down	-0.167963	0.0720144	0.0239952
ISC/EB-1	LOC5564212	LOC120420076	LOC5564212|AAEL004151	Down	-0.170379	0.022177	5.77812e-05
ISC/EB-1	LOC5563646	LOC120415928	LOC5563646|AAEL021083	Down	-0.171244	0.0180141	5.87628e-05
ISC/EB-1	LOC5577478	LOC120412343	LOC5577478|AAEL013221	Down	-0.182951	0.0192741	1.43773e-05
ISC/EB-1	LOC5570675	LOC120417799	LOC5570675|AAEL008481	Down	-0.184156	0.0203185	2.22216e-05
ISC/EB-1	LOC5576653	LOC120432390	LOC5576653|AAEL012686	Down	-0.195406	0.0220728	1.47239e-05
ISC/EB-1	LOC5580325	LOC120419177	LOC5580325|AAEL013068	Down	-0.198364	0.0763745	0.0141972
ISC/EB-1	LOC5576244	LOC120428195	LOC5576244|AAEL002851	Down	-0.202203	0.0531564	0.00160685
ISC/EB-1	LOC5570335	LOC120429710	LOC5570335|AAEL019669	Down	-0.204393	0.0430405	0.00245732
ISC/EB-1	LOC5573827	LOC120421466	LOC5573827|AAEL010756	Down	-0.210634	0.0199151	1.1322e-05
ISC/EB-1	LOC5578207	LOC120422861	LOC5578207|AAEL003462	Down	-0.217851	0.0991417	0.0371926
ISC/EB-1	LOC5573732	LOC120424171	LOC5573732|AAEL000291	Down	-0.218318	0.0653083	0.00240978
ISC/EB-1	LOC5573015	LOC120413491	LOC5573015|AAEL001916	Down	-0.227979	0.104546	0.0423915
ISC/EB-1	LOC5570233	LOC120414329	LOC5570233|AAEL008166	Down	-0.228828	0.0765716	0.00479904
ISC/EB-1	LOC5574485	LOC120414767	LOC5574485|AAEL002372	Down	-0.246437	0.020571	5.90861e-05
ISC/EB-1	LOC5574866	LOC120413062	LOC5574866|AAEL011471	Down	-0.252046	0.0196568	8.78239e-05
ISC/EB-1	LOC5577910	LOC120423988	LOC5577910|AAEL003352	Down	-0.252086	0.0797994	0.00300878
ISC/EB-1	LOC5575715	LOC120412942	LOC5575715|AAEL012026	Down	-0.254057	0.0546742	0.00032358
ISC/EB-1	LOC5571450	LOC120427611	LOC5571450|AAEL009078	Down	-0.254696	0.104874	0.0175965
ISC/EB-1	LOC5574404	LOC120425614	LOC5574404|AAEL011116	Down	-0.25786	0.051597	0.000205711
ISC/EB-1	LOC5575103	LOC120426999	LOC5575103|AAEL011657	Down	-0.26054	0.124191	0.0409918
ISC/EB-1	LOC5576079	LOC120413184	LOC5576079|AAEL012317	Down	-0.264562	0.105341	0.0187962
ISC/EB-1	LOC5580030	LOC120431174	LOC5580030|AAEL009653	Down	-0.275271	0.0206017	3.53535e-05
ISC/EB-1	LOC110675493	LOC120412866	LOC110675493|AAEL028043	Down	-0.275968	0.0199749	1.018e-06
ISC/EB-1	LOC5569787	LOC120415135	LOC5569787|AAEL023098	Down	-0.283155	0.104234	0.00959808
ISC/EB-1	LOC5569738	LOC120425096	LOC5569738|AAEL007868	Down	-0.283958	0.0715279	0.000640635
ISC/EB-1	LOC5575696	LOC120425529	LOC5575696|AAEL012010	Down	-0.284005	0.0813545	0.00229012
ISC/EB-1	LOC5564469	LOC120418023	LOC5564469|AAEL014452	Down	-0.285341	0.118522	0.0221956
ISC/EB-1	LOC5567109	LOC120418104	LOC5567109|AAEL005832	Down	-0.285732	0.118578	0.0173965
ISC/EB-1	LOC5575640	LOC120421010	LOC5575640|AAEL011972	Down	-0.287821	0.137414	0.0459908
ISC/EB-1	LOC5567491	LOC120425102	LOC5567491|AAEL000951	Down	-0.294035	0.0312897	0.000462405
ISC/EB-1	LOC5574069	LOC120423290	LOC5574069|nan	Down	-0.294153	0.125811	0.0241952
ISC/EB-1	LOC5576046	LOC120416571	LOC5576046|AAEL014932	Down	-0.304497	0.0328831	1.83246e-05
ISC/EB-1	LOC5578368	LOC120415684	LOC5578368|AAEL003530	Down	-0.308684	0.0201416	0.00027293
ISC/EB-1	LOC5571080	LOC120414792	LOC5571080|AAEL008787	Down	-0.309611	0.107063	0.00759848
ISC/EB-1	LOC5566520	LOC120416323	LOC5566520|AAEL005457	Down	-0.310135	0.131977	0.0229954
ISC/EB-1	LOC5573963	LOC120426320	LOC5573963|AAEL010826	Down	-0.310322	0.0547306	0.000176778
ISC/EB-1	LOC5573211	LOC120428267	LOC5573211|AAEL010318	Down	-0.314016	0.0300674	3.21031e-05
ISC/EB-1	LOC5574496	LOC120428234	LOC5574496|AAEL002399	Down	-0.317842	0.11895	0.0119976
ISC/EB-1	LOC5565441	LOC120422206	LOC5565441|AAEL000641	Down	-0.320293	0.0668651	0.00073297
ISC/EB-1	LOC5566370	LOC120418692	LOC5566370|AAEL005354	Down	-0.320619	0.125253	0.0157968
ISC/EB-1	LOC5570396	LOC120422347	LOC5570396|AAEL008291	Down	-0.322236	0.141624	0.0383923
ISC/EB-1	LOC5571453	LOC120427608	LOC5571453|AAEL009074	Down	-0.323703	0.090343	0.00175047
ISC/EB-1	LOC5570653	LOC120420181	LOC5570653|AAEL008461	Down	-0.323879	0.0987049	0.00176951
ISC/EB-1	LOC5569005	LOC120427824	LOC5569005|AAEL007282	Down	-0.326791	0.119965	0.00759848
ISC/EB-1	LOC5569076	LOC120413862	LOC5569076|AAEL001216	Down	-0.329088	0.105046	0.00279944
ISC/EB-1	LOC5576440	LOC120418978	LOC5576440|AAEL005536	Down	-0.33031	0.0889234	0.00172916
ISC/EB-1	LOC5579101	LOC120432658	LOC5579101|AAEL003842	Down	-0.341351	0.1057	0.00296329
ISC/EB-1	LOC5567126	LOC120422319	LOC5567126|AAEL005879	Down	-0.341394	0.151691	0.0333933
ISC/EB-1	LOC5563589	LOC120417128	LOC5563589|AAEL000090	Down	-0.350259	0.10886	0.0039992
ISC/EB-1	LOC5564225	LOC120419963	LOC5564225|AAEL023037	Down	-0.351017	0.145484	0.0257948
ISC/EB-1	LOC5564517	LOC120421541	LOC5564517|AAEL004291	Down	-0.352803	0.144304	0.0221956
ISC/EB-1	LOC5565353	LOC120424907	LOC5565353|AAEL004738	Down	-0.352886	0.150204	0.0285943
ISC/EB-1	LOC5575995	LOC120423279	LOC5575995|AAEL002761	Down	-0.352915	0.0959406	0.00190448
ISC/EB-1	LOC5573976	LOC120426075	LOC5573976|AAEL010814	Down	-0.356681	0.172181	0.0379924
ISC/EB-1	LOC5566689	LOC120423908	LOC5566689|AAEL005579	Down	-0.359259	0.151453	0.0235953
ISC/EB-1	LOC5564713	LOC120432237	LOC5564713|AAEL014583	Down	-0.360757	0.0192292	5.06668e-08
ISC/EB-1	LOC5567031	LOC120421236	LOC5567031|AAEL005766	Down	-0.360884	0.0599003	0.000264814
ISC/EB-1	LOC5572840	LOC120426575	LOC5572840|AAEL010063	Down	-0.361647	0.0874491	0.000670391
ISC/EB-1	LOC5567465	LOC120416353	LOC5567465|AAEL000942	Down	-0.362596	0.178004	0.0413917
ISC/EB-1	LOC5577080	LOC120412395	LOC5577080|AAEL012980	Down	-0.363684	0.112031	0.00319936
ISC/EB-1	LOC5572791	LOC120412848	LOC5572791|AAEL001896	Down	-0.367216	0.0775963	0.000610857
ISC/EB-1	LOC5580239	LOC120419134	LOC5580239|AAEL012326	Down	-0.367931	0.0480665	0.000160061
ISC/EB-1	LOC5568890	LOC120420805	LOC5568890|AAEL007197	Down	-0.371788	0.0967887	0.00198513
ISC/EB-1	LOC5570989	LOC120418273	LOC5570989|AAEL008719	Down	-0.372681	0.135931	0.0127974
ISC/EB-1	LOC5573600	LOC120422068	LOC5573600|AAEL002119	Down	-0.373535	0.172554	0.0425915
ISC/EB-1	LOC5568471	LOC120429766	LOC5568471|AAEL006885	Down	-0.375366	0.0387812	3.64837e-06
ISC/EB-1	LOC5574526	LOC120421049	LOC5574526|AAEL011197	Down	-0.37607	0.0323523	3.69212e-05
ISC/EB-1	LOC5572582	LOC120425748	LOC5572582|AAEL009898	Down	-0.380322	0.124869	0.0059988
ISC/EB-1	LOC5577132	LOC120414993	LOC5577132|AAEL023019	Down	-0.385735	0.156423	0.0181964
ISC/EB-1	LOC5565931	LOC120420757	LOC5565931|AAEL025321	Down	-0.389423	0.0871816	0.000550492
ISC/EB-1	LOC5564179	LOC120414427	LOC5564179|AAEL004141	Down	-0.3941	0.139778	0.0079984
ISC/EB-1	LOC5574674	LOC120415393	LOC5574674|AAEL011320	Down	-0.394633	0.147576	0.0129974
ISC/EB-1	LOC5577678	LOC120423847	LOC5577678|AAEL013314	Down	-0.398113	0.147792	0.0139972
ISC/EB-1	LOC5572601	LOC120425361	LOC5572601|AAEL009932	Down	-0.398525	0.168474	0.0257948
ISC/EB-1	LOC5577568	LOC120412428	LOC5577568|AAEL013279	Down	-0.400702	0.0603434	0.000176669
ISC/EB-1	LOC5580194	LOC120427399	LOC5580194|AAEL002539	Down	-0.403381	0.11483	0.00290898
ISC/EB-1	LOC5569522	LOC120419076	LOC5569522|AAEL007705	Down	-0.409985	0.157751	0.0137972
ISC/EB-1	LOC5567163	LOC120421718	LOC5567163|AAEL005901	Down	-0.411142	0.0235191	2.63293e-06
ISC/EB-1	LOC5570245	LOC120418357	LOC5570245|AAEL023182	Down	-0.412045	0.151141	0.00759848
ISC/EB-1	LOC5578538	LOC120426800	LOC5578538|AAEL013744	Down	-0.412274	0.11264	0.00184803
ISC/EB-1	LOC5563664	LOC120426692	LOC5563664|AAEL000084	Down	-0.413815	0.165966	0.0233953
ISC/EB-1	LOC5563786	LOC120414851	LOC5563786|AAEL003942	Down	-0.41876	0.0194405	2.48408e-06
ISC/EB-1	LOC5578313	LOC120421966	LOC5578313|AAEL013625	Down	-0.419852	0.0213741	2.36381e-06
ISC/EB-1	LOC5576927	LOC120428352	LOC5576927|AAEL019449	Down	-0.420483	0.172541	0.0227954
ISC/EB-1	LOC5568799	LOC120425907	LOC5568799|AAEL001159	Down	-0.423488	0.173423	0.0221956
ISC/EB-1	LOC5573407	LOC120420233	LOC5573407|AAEL002077	Down	-0.423888	0.144947	0.00559888
ISC/EB-1	LOC5570063	LOC120423637	LOC5570063|AAEL001354	Down	-0.427189	0.171705	0.0225955
ISC/EB-1	LOC110674760	LOC120432215	LOC110674760|AAEL021736	Down	-0.429321	0.195908	0.0335933
ISC/EB-1	LOC5570205	LOC120414363	LOC5570205|AAEL008167	Down	-0.434284	0.153026	0.00979804
ISC/EB-1	LOC5575846	LOC120432447	LOC5575846|AAEL012119	Down	-0.435632	0.1802	0.0213957
ISC/EB-1	LOC5575386	LOC120428134	LOC5575386|AAEL011789	Down	-0.436293	0.1219	0.00278323
ISC/EB-1	LOC5571226	LOC120412765	LOC5571226|AAEL008921	Down	-0.437468	0.0541141	0.000120788
ISC/EB-1	LOC5579227	LOC120423984	LOC5579227|AAEL014064	Down	-0.439632	0.0673034	8.02275e-05
ISC/EB-1	LOC5578257	LOC120413155	LOC5578257|AAEL013596	Down	-0.439635	0.165917	0.0143971
ISC/EB-1	LOC5570951	LOC120428691	LOC5570951|AAEL008674	Down	-0.442089	0.170645	0.020196
ISC/EB-1	LOC5571409	LOC120417619	LOC5571409|AAEL009051	Down	-0.443343	0.202121	0.0445911
ISC/EB-1	LOC5579810	LOC120415056	LOC5579810|AAEL005515	Down	-0.44813	0.0398416	4.99197e-06
ISC/EB-1	LOC5573830	LOC120416219	LOC5573830|AAEL010754	Down	-0.4486	0.0408399	4.55571e-05
ISC/EB-1	LOC5577723	LOC120414684	LOC5577723|AAEL013359	Down	-0.457554	0.0251692	6.33894e-06
ISC/EB-1	LOC5568633	LOC120414661	LOC5568633|AAEL007023	Down	-0.460932	0.0873547	0.000701575
ISC/EB-1	LOC5567581	LOC120413072	LOC5567581|AAEL006174	Down	-0.461654	0.135657	0.00239952
ISC/EB-1	LOC5569141	LOC120429106	LOC5569141|AAEL007390	Down	-0.463733	0.184698	0.0233953
ISC/EB-1	LOC5567821	LOC120419072	LOC5567821|AAEL000986	Down	-0.463962	0.0834753	0.000354466
ISC/EB-1	LOC5566723	LOC120424170	LOC5566723|AAEL015236	Down	-0.464168	0.192948	0.0259948
ISC/EB-1	LOC23687839	LOC120415968	LOC23687839|AAEL017419	Down	-0.466464	0.0458132	0.000124529
ISC/EB-1	LOC5573606	LOC120420976	LOC5573606|AAEL002125	Down	-0.469926	0.204028	0.029994
ISC/EB-1	LOC5571755	LOC120419430	LOC5571755|AAEL009278	Down	-0.47123	0.142854	0.00319936
ISC/EB-1	LOC5571047	LOC120419525	LOC5571047|AAEL008768	Down	-0.473068	0.0860096	0.000290908
ISC/EB-1	LOC5567162	LOC120421712	LOC5567162|AAEL005914	Down	-0.475238	0.2161	0.0383923
ISC/EB-1	LOC5573007	LOC120418658	LOC5573007|AAEL001925	Down	-0.475933	0.182194	0.0105979
ISC/EB-1	LOC5568618	LOC120423094	LOC5568618|AAEL006977	Down	-0.478728	0.11424	0.00178111
ISC/EB-1	LOC5577545	LOC120415534	LOC5577545|AAEL013249	Down	-0.480776	0.211615	0.0263947
ISC/EB-1	LOC5564580	LOC120426617	LOC5564580|AAEL024425	Down	-0.482385	0.206635	0.0239952
ISC/EB-1	LOC5572947	LOC120412943	LOC5572947|AAEL010170	Down	-0.484015	0.16961	0.00959808
ISC/EB-1	LOC5573492	LOC120418399	LOC5573492|AAEL010538	Down	-0.486095	0.187247	0.0131974
ISC/EB-1	LOC5573494	LOC120418414	LOC5573494|AAEL027554	Down	-0.49029	0.151539	0.00305777
ISC/EB-1	LOC5578582	LOC120423138	LOC5578582|AAEL013768	Down	-0.491937	0.157924	0.00459908
ISC/EB-1	LOC5569898	LOC120431522	LOC5569898|AAEL008002	Down	-0.493337	0.106513	0.000972422
ISC/EB-1	LOC23687516	LOC120427560	LOC23687516|AAEL017096	Down	-0.494107	0.0218057	3.51504e-06
ISC/EB-1	LOC5566119	LOC120430974	LOC5566119|AAEL022497	Down	-0.499499	0.152931	0.0029994
ISC/EB-1	LOC5567314	LOC120416091	LOC5567314|AAEL005968	Down	-0.499701	0.219733	0.0341932
ISC/EB-1	LOC5566563	LOC120420009	LOC5566563|AAEL005493	Down	-0.499872	0.178801	0.0119976
ISC/EB-1	LOC5564165	LOC120424397	LOC5564165|AAEL004147	Down	-0.49999	0.218446	0.0289942
ISC/EB-1	LOC5577456	LOC120414352	LOC5577456|AAEL013199	Down	-0.507172	0.138678	0.00275011
ISC/EB-1	LOC5575828	LOC120415057	LOC5575828|AAEL012095	Down	-0.508956	0.163635	0.0039992
ISC/EB-1	LOC5570784	LOC120414464	LOC5570784|AAEL022646	Down	-0.514797	0.141954	0.00180851
ISC/EB-1	LOC5572548	LOC120430683	LOC5572548|AAEL009874	Down	-0.524236	0.159912	0.00279944
ISC/EB-1	LOC5572925	LOC120413522	LOC5572925|AAEL010143	Down	-0.524873	0.191105	0.0169966
ISC/EB-1	LOC5568476	LOC120419491	LOC5568476|AAEL006886	Down	-0.527123	0.137876	0.00176394
ISC/EB-1	LOC5575512	LOC120427816	LOC5575512|AAEL011881	Down	-0.531417	0.195706	0.0119976
ISC/EB-1	LOC5571685	LOC120426394	LOC5571685|AAEL009214	Down	-0.533429	0.0905462	0.00022763
ISC/EB-1	LOC5564133	LOC120428925	LOC5564133|AAEL004088	Down	-0.533691	0.0698279	2.80896e-05
ISC/EB-1	LOC5566977	LOC120414545	LOC5566977|AAEL005739	Down	-0.536267	0.0934844	0.00028063
ISC/EB-1	LOC5564541	LOC120426262	LOC5564541|AAEL004307	Down	-0.537009	0.174541	0.00419916
ISC/EB-1	LOC5569310	LOC120428306	LOC5569310|AAEL007549	Down	-0.53851	0.0673583	0.000692942
ISC/EB-1	LOC5564604	LOC120424264	LOC5564604|AAEL014529	Down	-0.539602	0.180348	0.00639872
ISC/EB-1	LOC5571444	LOC120427613	LOC5571444|AAEL009080	Down	-0.541329	0.177031	0.00559888
ISC/EB-1	LOC5575983	LOC120421060	LOC5575983|AAEL012233	Down	-0.542217	0.0842356	0.000247056
ISC/EB-1	LOC5575377	LOC120423192	LOC5575377|AAEL011778	Down	-0.543061	0.221307	0.0193961
ISC/EB-1	LOC5574834	LOC120416313	LOC5574834|AAEL011433	Down	-0.54394	0.188877	0.00579884
ISC/EB-1	LOC5565657	LOC120415766	LOC5565657|AAEL004914	Down	-0.544455	0.198207	0.0111978
ISC/EB-1	LOC5578974	LOC120421337	LOC5578974|AAEL019746	Down	-0.545109	0.165955	0.00279944
ISC/EB-1	LOC23687841	LOC120425472	LOC23687841|AAEL017421	Down	-0.545872	0.133915	0.00109869
ISC/EB-1	LOC5568828	LOC120414748	LOC5568828|AAEL001164	Down	-0.54745	0.104867	0.000312375
ISC/EB-1	LOC5576054	LOC120431290	LOC5576054|AAEL013952	Down	-0.548055	0.132948	0.0013182
ISC/EB-1	LOC5564681	LOC120429283	LOC5564681|AAEL008334	Down	-0.553881	0.196387	0.0119976
ISC/EB-1	LOC5576266	LOC120417524	LOC5576266|AAEL012419	Down	-0.554931	0.157283	0.00306101
ISC/EB-1	LOC5571150	LOC120414675	LOC5571150|AAEL008848	Down	-0.556113	0.0759379	7.79384e-05
ISC/EB-1	LOC5570055	LOC120429834	LOC5570055|AAEL000159	Down	-0.557877	0.168432	0.00259948
ISC/EB-1	LOC5570108	LOC120413352	LOC5570108|AAEL020238	Down	-0.562922	0.0251334	6.05742e-06
ISC/EB-1	LOC5574042	LOC120413412	LOC5574042|AAEL010879	Down	-0.567974	0.18426	0.00619876
ISC/EB-1	LOC5578382	LOC120431856	LOC5578382|AAEL013661	Down	-0.570358	0.0439633	1.19802e-05
ISC/EB-1	LOC5570505	LOC120425590	LOC5570505|AAEL001411	Down	-0.570481	0.0745328	0.000117492
ISC/EB-1	LOC5569183	LOC120417350	LOC5569183|AAEL007439	Down	-0.571712	0.0588431	7.35136e-05
ISC/EB-1	LOC5564782	LOC120419429	LOC5564782|AAEL004427	Down	-0.571714	0.189336	0.00679864
ISC/EB-1	LOC5576102	LOC120417437	LOC5576102|AAEL002779	Down	-0.575359	0.181394	0.00559888
ISC/EB-1	LOC5567495	LOC120421831	LOC5567495|AAEL000934	Down	-0.577445	0.109752	0.000357235
ISC/EB-1	LOC5567260	LOC120413950	LOC5567260|AAEL005928	Down	-0.586611	0.187162	0.00379924
ISC/EB-1	LOC5569497	LOC120428097	LOC5569497|AAEL007681	Down	-0.588188	0.13894	0.00107646
ISC/EB-1	LOC5575914	LOC120417470	LOC5575914|AAEL012175	Down	-0.590363	0.0510843	1.82288e-06
ISC/EB-1	LOC5577291	LOC120416523	LOC5577291|AAEL013144	Down	-0.591837	0.0598035	1.62136e-05
ISC/EB-1	LOC5575971	LOC120427435	LOC5575971|AAEL012218	Down	-0.591953	0.224646	0.0145971
ISC/EB-1	LOC5576214	LOC120418437	LOC5576214|AAEL002827	Down	-0.59232	0.0635142	8.63153e-05
ISC/EB-1	LOC5566298	LOC120424385	LOC5566298|AAEL000746	Down	-0.593686	0.129671	0.00104104
ISC/EB-1	LOC5571153	LOC120414669	LOC5571153|AAEL008849	Down	-0.599469	0.115253	0.000556587
ISC/EB-1	LOC5571484	LOC120417403	LOC5571484|AAEL001605	Down	-0.599858	0.147017	0.000983748
ISC/EB-1	LOC5567237	LOC120429109	LOC5567237|AAEL000874	Down	-0.601783	0.186554	0.00319936
ISC/EB-1	LOC5573879	LOC120417872	LOC5573879|AAEL010801	Down	-0.609791	0.0574066	5.93942e-06
ISC/EB-1	LOC5565266	LOC120429495	LOC5565266|AAEL004699	Down	-0.611839	0.0781823	8.2151e-05
ISC/EB-1	LOC5568520	LOC120416996	LOC5568520|AAEL027905	Down	-0.613653	0.168877	0.00333783
ISC/EB-1	LOC5578843	LOC120418995	LOC5578843|AAEL003731	Down	-0.618281	0.204925	0.00559888
ISC/EB-1	LOC5573312	LOC120430273	LOC5573312|AAEL010416	Down	-0.620355	0.0940922	0.00027158
ISC/EB-1	LOC5577555	LOC120426190	LOC5577555|AAEL013267	Down	-0.620497	0.161697	0.00174158
ISC/EB-1	LOC5568113	LOC120422824	LOC5568113|AAEL006557	Down	-0.623207	0.1991	0.00459908
ISC/EB-1	LOC5575681	LOC120418961	LOC5575681|AAEL011992	Down	-0.626098	0.0916985	7.37651e-05
ISC/EB-1	LOC5566935	LOC120417329	LOC5566935|AAEL005709	Down	-0.628566	0.203873	0.00719856
ISC/EB-1	LOC5569566	LOC120412599	LOC5569566|AAEL007752	Down	-0.635699	0.0577635	5.52897e-05
ISC/EB-1	LOC5576042	LOC120426786	LOC5576042|AAEL012279	Down	-0.641479	0.176469	0.00195066
ISC/EB-1	LOC5572867	LOC120422701	LOC5572867|AAEL010087	Down	-0.646685	0.160072	0.00204469
ISC/EB-1	LOC5577719	LOC120414695	LOC5577719|AAEL013353	Down	-0.647416	0.0454004	0.000290864
ISC/EB-1	LOC5565652	LOC120415735	LOC5565652|AAEL004902	Down	-0.648637	0.120275	0.000284594
ISC/EB-1	LOC5580073	LOC120419278	LOC5580073|AAEL002158	Down	-0.649085	0.0951609	0.000203824
ISC/EB-1	LOC5565550	LOC120416490	LOC5565550|AAEL004854	Down	-0.660519	0.166459	0.00179799
ISC/EB-1	LOC5569539	LOC120425794	LOC5569539|AAEL007713	Down	-0.660641	0.209991	0.00419916
ISC/EB-1	LOC5579795	LOC120418438	LOC5579795|AAEL003957	Down	-0.673554	0.0430673	1.31196e-05
ISC/EB-1	LOC5573337	LOC120426769	LOC5573337|AAEL010430	Down	-0.674085	0.206923	0.00319936
ISC/EB-1	LOC5580010	LOC120416356	LOC5580010|AAEL009637	Down	-0.676058	0.0816529	0.000114733
ISC/EB-1	LOC5569700	LOC120420492	LOC5569700|AAEL007845	Down	-0.677668	0.0952449	0.000105653
ISC/EB-1	LOC5564041	LOC120418066	LOC5564041|AAEL004042	Down	-0.680341	0.0998736	5.82459e-05
ISC/EB-1	LOC5577113	LOC120426843	LOC5577113|AAEL008697	Down	-0.680727	0.0528049	7.52024e-05
ISC/EB-1	LOC5572640	LOC120414106	LOC5572640|AAEL001838	Down	-0.680808	0.180221	0.00228632
ISC/EB-1	LOC5576201	LOC120423840	LOC5576201|AAEL012394	Down	-0.685819	0.176971	0.00110131
ISC/EB-1	LOC5565774	LOC120422963	LOC5565774|AAEL004988	Down	-0.691618	0.187953	0.00239161
ISC/EB-1	LOC5569042	LOC120423128	LOC5569042|AAEL007332	Down	-0.691736	0.146335	0.000761446
ISC/EB-1	LOC5568708	LOC120431538	LOC5568708|AAEL007054	Down	-0.694688	0.092435	8.41644e-05
ISC/EB-1	LOC5579996	LOC120412890	LOC5579996|AAEL025915	Down	-0.698554	0.176097	0.00183171
ISC/EB-1	LOC5569520	LOC120419078	LOC5569520|AAEL007707	Down	-0.699804	0.0675733	5.49905e-05
ISC/EB-1	LOC5580036	LOC120421130	LOC5580036|AAEL010230	Down	-0.705918	0.0936013	0.000160841
ISC/EB-1	LOC5564962	LOC120413234	LOC5564962|AAEL014889	Down	-0.705954	0.116907	0.000571404
ISC/EB-1	LOC5567286	LOC120427882	LOC5567286|AAEL005946	Down	-0.70615	0.106589	0.000201222
ISC/EB-1	LOC5570237	LOC120414305	LOC5570237|AAEL008171	Down	-0.707015	0.164707	0.00126636
ISC/EB-1	LOC5565707	LOC120426940	LOC5565707|AAEL014949	Down	-0.707699	0.1989	0.0029994
ISC/EB-1	LOC5570619	LOC120424934	LOC5570619|AAEL008425	Down	-0.710008	0.176581	0.00110918
ISC/EB-1	LOC5568814	LOC120416311	LOC5568814|AAEL001194	Down	-0.710558	0.159449	0.00072778
ISC/EB-1	LOC5572799	LOC120412826	LOC5572799|AAEL001904	Down	-0.712215	0.116031	0.000400577
ISC/EB-1	LOC5575492	LOC120412609	LOC5575492|AAEL011871	Down	-0.715505	0.0758416	6.10146e-05
ISC/EB-1	LOC5568876	LOC120414116	LOC5568876|AAEL023521	Down	-0.716732	0.192972	0.00202594
ISC/EB-1	LOC5565621	LOC120413156	LOC5565621|AAEL020696	Down	-0.717631	0.147511	0.00065533
ISC/EB-1	LOC5573990	LOC120413438	LOC5573990|AAEL010840	Down	-0.719479	0.114281	0.000299231
ISC/EB-1	LOC5568331	LOC120421045	LOC5568331|AAEL001094	Down	-0.720666	0.0986561	5.71357e-05
ISC/EB-1	LOC5565270	LOC120417029	LOC5565270|AAEL004691	Down	-0.720697	0.0746435	3.70044e-05
ISC/EB-1	LOC5577071	LOC120423653	LOC5577071|AAEL003106	Down	-0.721349	0.177707	0.00155593
ISC/EB-1	LOC5579263	LOC120412604	LOC5579263|AAEL011873	Down	-0.722185	0.113476	0.000125317
ISC/EB-1	LOC5578343	LOC128092953	LOC5578343|AAEL003514	Down	-0.723637	0.182324	0.00118103
ISC/EB-1	LOC5567587	LOC120413963	LOC5567587|AAEL006186	Down	-0.730297	0.156735	0.00108771
ISC/EB-1	LOC5575223	LOC120424290	LOC5575223|AAEL010608	Down	-0.731607	0.141872	0.000577039
ISC/EB-1	LOC5566092	LOC120426846	LOC5566092|AAEL005170	Down	-0.73534	0.0556711	1.27911e-05
ISC/EB-1	LOC5576767	LOC120424884	LOC5576767|AAEL012751	Down	-0.736943	0.207678	0.0029994
ISC/EB-1	LOC5567100	LOC120412889	LOC5567100|AAEL005830	Down	-0.743547	0.181285	0.00176548
ISC/EB-1	LOC5571429	LOC120413618	LOC5571429|AAEL009066	Down	-0.74364	0.110223	0.000308314
ISC/EB-1	LOC5569035	LOC120423127	LOC5569035|AAEL026700	Down	-0.743773	0.174731	0.00158801
ISC/EB-1	LOC110679171	LOC120421370	LOC110679171|AAEL009684	Down	-0.748348	0.107944	0.000258777
ISC/EB-1	LOC5566309	LOC120424465	LOC5566309|AAEL005308	Down	-0.751661	0.163385	0.000913881
ISC/EB-1	LOC5579467	LOC120432362	LOC5579467|AAEL023603	Down	-0.75969	0.0936506	4.82335e-05
ISC/EB-1	LOC5568246	LOC120419674	LOC5568246|AAEL006685	Down	-0.762387	0.109788	0.000147364
ISC/EB-1	LOC5566901	LOC120416993	LOC5566901|AAEL000854	Down	-0.76631	0.165526	0.000538731
ISC/EB-1	LOC5565372	LOC120424896	LOC5565372|AAEL004755	Down	-0.767801	0.211522	0.00329394
ISC/EB-1	LOC5580011	LOC120416109	LOC5580011|AAEL009634	Down	-0.769175	0.208359	0.00244468
ISC/EB-1	LOC5571418	LOC120422937	LOC5571418|AAEL009059	Down	-0.773932	0.111599	0.00018123
ISC/EB-1	LOC5567383	LOC120432196	LOC5567383|AAEL006061	Down	-0.777236	0.12807	0.00049371
ISC/EB-1	LOC5579199	LOC120425011	LOC5579199|AAEL014039	Down	-0.780081	0.0555942	2.31232e-05
ISC/EB-1	LOC5576650	LOC120432385	LOC5576650|AAEL012684	Down	-0.782056	0.0751341	8.31916e-05
ISC/EB-1	LOC5574806	LOC120426794	LOC5574806|AAEL002467	Down	-0.782687	0.177646	0.00094898
ISC/EB-1	LOC5568553	LOC120426562	LOC5568553|AAEL001109	Down	-0.785142	0.198006	0.00119493
ISC/EB-1	LOC5571265	LOC120419737	LOC5571265|AAEL001588	Down	-0.785616	0.156506	0.000441623
ISC/EB-1	LOC5568668	LOC120423438	LOC5568668|AAEL007022	Down	-0.786005	0.161656	0.000536068
ISC/EB-1	LOC5563880	LOC120420867	LOC5563880|AAEL014198	Down	-0.786849	0.125785	7.11123e-05
ISC/EB-1	LOC5567559	LOC120413278	LOC5567559|AAEL006158	Down	-0.79058	0.0541077	2.41858e-06
ISC/EB-1	LOC5578532	LOC120429645	LOC5578532|AAEL013739	Down	-0.791621	0.158171	0.000376798
ISC/EB-1	LOC5567501	LOC120429321	LOC5567501|AAEL006115	Down	-0.79434	0.0600689	3.3431e-06
ISC/EB-1	LOC5567793	LOC120421810	LOC5567793|AAEL000138	Down	-0.795159	0.127891	9.15422e-05
ISC/EB-1	LOC5566694	LOC120423890	LOC5566694|AAEL005580	Down	-0.795513	0.186364	0.00159601
ISC/EB-1	LOC5568726	LOC120425377	LOC5568726|AAEL007078	Down	-0.79583	0.145972	0.000779762
ISC/EB-1	LOC5572432	LOC120419803	LOC5572432|AAEL001810	Down	-0.795989	0.14709	0.000342361
ISC/EB-1	LOC5575668	LOC120412653	LOC5575668|AAEL002687	Down	-0.796535	0.150821	0.000687851
ISC/EB-1	LOC5574995	LOC120424694	LOC5574995|AAEL002523	Down	-0.797718	0.204474	0.00240428
ISC/EB-1	LOC5575242	LOC120418498	LOC5575242|AAEL011711	Down	-0.797825	0.0433836	6.30548e-08
ISC/EB-1	LOC5570455	LOC120425894	LOC5570455|AAEL008341	Down	-0.799899	0.0923336	0.000242807
ISC/EB-1	LOC5574976	LOC120424532	LOC5574976|AAEL002501	Down	-0.800775	0.104466	0.000126493
ISC/EB-1	LOC5574190	LOC120418575	LOC5574190|AAEL002308	Down	-0.802	0.0791719	4.57098e-05
ISC/EB-1	LOC110674163	LOC120421779	LOC110674163|AAEL022901	Down	-0.804629	0.179322	0.00148791
ISC/EB-1	LOC5568408	LOC120424313	LOC5568408|AAEL006829	Down	-0.80566	0.0945225	8.49869e-05
ISC/EB-1	LOC5569466	LOC120420228	LOC5569466|AAEL007662	Down	-0.808645	0.108134	7.2079e-05
ISC/EB-1	LOC5566793	LOC120422288	LOC5566793|AAEL026243	Down	-0.808836	0.130776	0.000331562
ISC/EB-1	LOC5574525	LOC120421080	LOC5574525|AAEL011202	Down	-0.810349	0.192879	0.00116125
ISC/EB-1	LOC110676224	LOC120424977	LOC110676224|AAEL020597	Down	-0.814539	0.180185	0.00124615
ISC/EB-1	LOC5576039	LOC120423605	LOC5576039|AAEL012280	Down	-0.816087	0.161529	0.000561105
ISC/EB-1	LOC5567565	LOC120413276	LOC5567565|AAEL006169	Down	-0.816659	0.095055	9.14388e-06
ISC/EB-1	LOC5578624	LOC120413351	LOC5578624|AAEL003597	Down	-0.820706	0.173119	0.000613023
ISC/EB-1	LOC5568202	LOC120421686	LOC5568202|AAEL006634	Down	-0.824453	0.159433	0.00058805
ISC/EB-1	LOC5564039	LOC120430120	LOC5564039|AAEL004065	Down	-0.830708	0.136381	0.000120428
ISC/EB-1	LOC5571414	LOC120423737	LOC5571414|AAEL009041	Down	-0.832546	0.170741	0.000711149
ISC/EB-1	LOC110675318	LOC120421456	LOC110675318|-	Down	-0.839055	0.137137	0.000199679
ISC/EB-1	LOC110676030	LOC120431867	LOC110676030|AAEL024500	Down	-0.839144	0.183251	0.000600486
ISC/EB-1	LOC5571900	LOC120414326	LOC5571900|AAEL009377	Down	-0.84158	0.12007	0.000136622
ISC/EB-1	LOC5578184	LOC128092666	LOC5578184|AAEL003469	Down	-0.851604	0.152361	0.000636584
ISC/EB-1	LOC5566232	LOC120429984	LOC5566232|AAEL005262	Down	-0.853032	0.172712	0.000698116
ISC/EB-1	LOC5570561	LOC120428863	LOC5570561|AAEL008390	Down	-0.856183	0.174809	0.00068401
ISC/EB-1	LOC5564516	LOC120413623	LOC5564516|AAEL004284	Down	-0.861217	0.0714376	6.15871e-06
ISC/EB-1	LOC5570780	LOC120418831	LOC5570780|AAEL008543	Down	-0.861707	0.0956168	3.20649e-05
ISC/EB-1	LOC5577687	LOC120419444	LOC5577687|AAEL013320	Down	-0.864708	0.16251	0.000580456
ISC/EB-1	LOC5564544	LOC120426263	LOC5564544|AAEL004319	Down	-0.866069	0.134059	9.71203e-05
ISC/EB-1	LOC110681498	LOC120430224	LOC110681498|AAEL023347	Down	-0.879801	0.127795	0.000187645
ISC/EB-1	LOC23687502	LOC120419184	LOC23687502|AAEL017082	Down	-0.880111	0.127961	0.000131766
ISC/EB-1	LOC5565513	LOC120425495	LOC5565513|AAEL014863	Down	-0.884725	0.17866	0.000674363
ISC/EB-1	LOC5568081	LOC120417288	LOC5568081|AAEL006516	Down	-0.886851	0.167588	0.000762608
ISC/EB-1	LOC5565328	LOC120416772	LOC5565328|AAEL004727	Down	-0.888289	0.175108	0.000567531
ISC/EB-1	LOC5567118	LOC120422285	LOC5567118|AAEL015304	Down	-0.892487	0.153214	0.000320997
ISC/EB-1	LOC5578082	LOC120427642	LOC5578082|AAEL003423	Down	-0.893259	0.101087	0.000172067
ISC/EB-1	LOC5570090	LOC120432597	LOC5570090|AAEL001356	Down	-0.89728	0.112719	0.000113998
ISC/EB-1	LOC5564860	LOC120417502	LOC5564860|AAEL004472	Down	-0.898995	0.109591	4.98544e-05
ISC/EB-1	LOC110680850	LOC120428466	LOC110680850|-	Down	-0.901963	0.177868	0.0003271
ISC/EB-1	LOC5573469	LOC120426702	LOC5573469|AAEL010513	Down	-0.903667	0.201009	0.000795355
ISC/EB-1	LOC5577630	LOC120425646	LOC5577630|AAEL003234	Down	-0.909486	0.0594045	1.41605e-06
ISC/EB-1	LOC5578119	LOC120416813	LOC5578119|AAEL003412	Down	-0.910258	0.164558	0.000363735
ISC/EB-1	LOC5574943	LOC120415132	LOC5574943|AAEL010453	Down	-0.912203	0.176519	0.000703705
ISC/EB-1	LOC5576029	LOC120416275	LOC5576029|AAEL012262	Down	-0.916907	0.133054	0.000218672
ISC/EB-1	LOC5578271	LOC120420729	LOC5578271|AAEL003491	Down	-0.923799	0.222653	0.00168791
ISC/EB-1	LOC5567167	LOC120422106	LOC5567167|AAEL005897	Down	-0.924526	0.174728	0.000490748
ISC/EB-1	LOC5569745	LOC120427511	LOC5569745|AAEL007883	Down	-0.926429	0.0564447	1.78636e-06
ISC/EB-1	LOC5574484	LOC120418969	LOC5574484|AAEL002401	Down	-0.931952	0.142604	0.000272936
ISC/EB-1	LOC5566650	LOC120422575	LOC5566650|AAEL015644	Down	-0.934855	0.190955	0.000590021
ISC/EB-1	LOC5564326	LOC120420630	LOC5564326|AAEL019671	Down	-0.935024	0.192965	0.000952024
ISC/EB-1	LOC5566532	LOC120431192	LOC5566532|AAEL015202	Down	-0.935227	0.170455	0.000338584
ISC/EB-1	LOC5570553	LOC120413652	LOC5570553|AAEL008374	Down	-0.941433	0.216359	0.00160477
ISC/EB-1	LOC23687404	LOC120416302	LOC23687404|AAEL016984	Down	-0.94679	0.0490122	1.22478e-05
ISC/EB-1	LOC5578926	LOC120430498	LOC5578926|AAEL003746	Down	-0.947226	0.121113	6.89968e-05
ISC/EB-1	LOC5564542	LOC120422617	LOC5564542|AAEL004313	Down	-0.952746	0.166623	0.000321992
ISC/EB-1	LOC5567908	LOC120416425	LOC5567908|AAEL006363	Down	-0.955035	0.176944	0.000576859
ISC/EB-1	LOC5568717	LOC120415122	LOC5568717|AAEL007043	Down	-0.957546	0.156752	0.000289513
ISC/EB-1	LOC5573175	LOC120421176	LOC5573175|AAEL019559	Down	-0.960709	0.176423	0.000399836
ISC/EB-1	LOC5573489	LOC120422094	LOC5573489|AAEL014505	Down	-0.960711	0.124206	3.98955e-05
ISC/EB-1	LOC5573615	LOC120425296	LOC5573615|AAEL010611	Down	-0.961935	0.0859579	6.53045e-05
ISC/EB-1	LOC5571609	LOC120423741	LOC5571609|AAEL009201	Down	-0.962397	0.0576415	6.17869e-06
ISC/EB-1	LOC5564895	LOC120414476	LOC5564895|AAEL014642	Down	-0.962813	0.138568	0.000130294
ISC/EB-1	LOC5579044	LOC120420848	LOC5579044|AAEL013982	Down	-0.964798	0.156461	0.000402872
ISC/EB-1	LOC5566055	LOC120425960	LOC5566055|AAEL005150	Down	-0.966625	0.184121	0.000690685
ISC/EB-1	LOC5565060	LOC120425499	LOC5565060|AAEL025769	Down	-0.96892	0.0907739	1.83432e-06
ISC/EB-1	LOC5580164	LOC120420713	LOC5580164|AAEL002557	Down	-0.975177	0.171462	0.000562981
ISC/EB-1	LOC5567996	LOC120414574	LOC5567996|AAEL006441	Down	-0.975374	0.172708	0.000148504
ISC/EB-1	LOC5577483	LOC120414889	LOC5577483|AAEL013236	Down	-0.983525	0.170404	0.000882509
ISC/EB-1	LOC5573673	LOC120412918	LOC5573673|AAEL019604	Down	-0.984923	0.0887796	9.93678e-05
ISC/EB-1	LOC5578121	LOC120416855	LOC5578121|AAEL003431	Down	-0.986571	0.193716	0.000527591
ISC/EB-1	LOC5570670	LOC120417824	LOC5570670|AAEL008490	Down	-0.98929	0.110601	7.56911e-05
ISC/EB-1	LOC5569074	LOC120413874	LOC5569074|AAEL001210	Down	-0.990357	0.120305	0.000115928
ISC/EB-1	LOC5568110	LOC120422833	LOC5568110|AAEL006564	Down	-0.990993	0.170391	0.00083763
ISC/EB-1	LOC5570695	LOC120415708	LOC5570695|AAEL008492	Down	-0.993613	0.163078	0.000210859
ISC/EB-1	LOC5571045	LOC120419516	LOC5571045|AAEL008770	Down	-0.99506	0.148723	0.000170612
ISC/EB-1	LOC5578376	LOC120419640	LOC5578376|AAEL019481	Down	-1.0165	0.158425	0.000261419
ISC/EB-1	LOC5570204	LOC120414346	LOC5570204|AAEL008164	Down	-1.02235	0.201059	0.00108097
ISC/EB-1	LOC5567660	LOC120417923	LOC5567660|AAEL012740	Down	-1.02396	0.0286932	6.52132e-07
ISC/EB-1	LOC5572167	LOC120418340	LOC5572167|AAEL023148	Down	-1.04634	0.197432	0.000620588
ISC/EB-1	LOC5569847	LOC120422440	LOC5569847|AAEL007962	Down	-1.04917	0.167921	0.00048317
ISC/EB-1	LOC5565942	LOC120420749	LOC5565942|AAEL019563	Down	-1.05241	0.181589	0.000219258
ISC/EB-1	LOC5574980	LOC120431230	LOC5574980|AAEL002508	Down	-1.05505	0.205453	0.000473701
ISC/EB-1	LOC5569864	LOC120415490	LOC5569864|AAEL007944	Down	-1.07264	0.172203	8.63525e-05
ISC/EB-1	LOC5568150	LOC120430393	LOC5568150|AAEL006577	Down	-1.07593	0.153727	0.000130614
ISC/EB-1	LOC5580331	LOC120422783	LOC5580331|AAEL013074	Down	-1.07745	0.0862789	2.41811e-05
ISC/EB-1	LOC5576353	LOC120427414	LOC5576353|AAEL002881	Down	-1.07982	0.0595025	8.99603e-06
ISC/EB-1	LOC5575162	LOC120413506	LOC5575162|AAEL000328	Down	-1.08344	0.148548	0.000299418
ISC/EB-1	LOC5564724	LOC120419283	LOC5564724|AAEL004404	Down	-1.09519	0.169482	0.000372988
ISC/EB-1	LOC5575645	LOC120423824	LOC5575645|AAEL011979	Down	-1.09592	0.179809	8.0705e-05
ISC/EB-1	LOC5571143	LOC120414667	LOC5571143|AAEL008853	Down	-1.10079	0.206738	0.00041213
ISC/EB-1	LOC5580166	LOC120420716	LOC5580166|AAEL002542	Down	-1.10332	0.15099	0.000114386
ISC/EB-1	LOC5575135	LOC120420648	LOC5575135|AAEL000330	Down	-1.11157	0.166031	0.000220249
ISC/EB-1	LOC5576082	LOC120413183	LOC5576082|AAEL012312	Down	-1.12185	0.140593	0.000216113
ISC/EB-1	LOC5565400	LOC120424903	LOC5565400|AAEL004783	Down	-1.12221	0.0611499	3.52285e-06
ISC/EB-1	LOC5571789	LOC120415975	LOC5571789|AAEL009317	Down	-1.12412	0.110803	9.17096e-05
ISC/EB-1	LOC5569540	LOC120425797	LOC5569540|AAEL007717	Down	-1.12574	0.160146	5.42439e-05
ISC/EB-1	LOC23687632	LOC120429844	LOC23687632|AAEL017212	Down	-1.13112	0.0818655	1.16603e-05
ISC/EB-1	LOC5571437	LOC120422124	LOC5571437|AAEL009070	Down	-1.13135	0.156111	0.000448269
ISC/EB-1	LOC5564627	LOC120428820	LOC5564627|AAEL025567	Down	-1.13331	0.148442	0.000190391
ISC/EB-1	LOC5571305	LOC120422057	LOC5571305|AAEL008958	Down	-1.13341	0.166918	0.000306826
ISC/EB-1	LOC5564581	LOC120426517	LOC5564581|AAEL004347	Down	-1.13753	0.10332	1.67934e-05
ISC/EB-1	LOC5578960	LOC120415489	LOC5578960|AAEL013939	Down	-1.14129	0.194644	0.000978905
ISC/EB-1	LOC5580056	LOC120414526	LOC5580056|AAEL002174	Down	-1.14429	0.152894	0.000269344
ISC/EB-1	LOC5576477	LOC120416238	LOC5576477|AAEL002887	Down	-1.15655	0.130128	2.04994e-05
ISC/EB-1	LOC5574500	LOC120427680	LOC5574500|AAEL023902	Down	-1.16037	0.212589	0.000544733
ISC/EB-1	LOC5575182	LOC120412803	LOC5575182|AAEL019826	Down	-1.161	0.124554	9.4445e-05
ISC/EB-1	LOC5572696	LOC120420687	LOC5572696|AAEL009964	Down	-1.16438	0.0549224	1.64838e-06
ISC/EB-1	LOC23687901	LOC120425410	LOC23687901|AAEL017481	Down	-1.16469	0.0496207	2.26752e-06
ISC/EB-1	LOC5579168	LOC120414606	LOC5579168|AAEL003871	Down	-1.16669	0.17865	0.000460352
ISC/EB-1	LOC5576914	LOC120422149	LOC5576914|AAEL012865	Down	-1.17666	0.143577	0.000110648
ISC/EB-1	LOC110678069	LOC120429234	LOC110678069|AAEL011752	Down	-1.18096	0.200452	0.000290254
ISC/EB-1	LOC5577094	LOC120416731	LOC5577094|AAEL012996	Down	-1.1854	0.156404	0.000220929
ISC/EB-1	LOC5570176	LOC120422956	LOC5570176|AAEL024563	Down	-1.18582	0.19025	0.000730792
ISC/EB-1	LOC5580273	LOC120414080	LOC5580273|AAEL003009	Down	-1.18705	0.198818	0.000629402
ISC/EB-1	LOC5564563	LOC120420045	LOC5564563|AAEL014510	Down	-1.19287	0.14369	7.89931e-05
ISC/EB-1	LOC5576642	LOC120427768	LOC5576642|AAEL012671	Down	-1.19534	0.06145	8.2549e-07
ISC/EB-1	LOC5577509	LOC120416018	LOC5577509|AAEL003206	Down	-1.1965	0.18383	0.000296398
ISC/EB-1	LOC5579328	LOC120417809	LOC5579328|AAEL023188	Down	-1.19733	0.173355	0.000507253
ISC/EB-1	LOC5570014	LOC120419565	LOC5570014|AAEL000179	Down	-1.1977	0.171721	9.28406e-05
ISC/EB-1	LOC5564319	LOC120420635	LOC5564319|AAEL000574	Down	-1.22	0.19151	0.000238853
ISC/EB-1	LOC5575837	LOC120415043	LOC5575837|AAEL012094	Down	-1.22715	0.140293	2.81204e-05
ISC/EB-1	LOC5564249	LOC120413710	LOC5564249|AAEL004195	Down	-1.24618	0.211814	0.000853696
ISC/EB-1	LOC5573744	LOC120415308	LOC5573744|AAEL019937	Down	-1.24913	0.0685517	1.12376e-05
ISC/EB-1	LOC5565629	LOC120424232	LOC5565629|AAEL014913	Down	-1.25	0.086367	1.15991e-05
ISC/EB-1	LOC5573060	LOC120414900	LOC5573060|AAEL010244	Down	-1.25251	0.125459	3.60442e-05
ISC/EB-1	LOC5579021	LOC120432387	LOC5579021|AAEL013960	Down	-1.25307	0.12958	2.68204e-05
ISC/EB-1	LOC5570020	LOC120419568	LOC5570020|AAEL000182	Down	-1.25333	0.093286	6.23018e-05
ISC/EB-1	LOC5565279	LOC120420052	LOC5565279|AAEL014799	Down	-1.25521	0.209325	0.000528271
ISC/EB-1	LOC110678469	LOC120423855	LOC110678469|AAEL027771	Down	-1.25677	0.169474	0.000255909
ISC/EB-1	LOC23687710	LOC120422806	LOC23687710|AAEL017290	Down	-1.25888	0.0897509	1.33131e-05
ISC/EB-1	LOC5573466	LOC120423179	LOC5573466|AAEL010505	Down	-1.2774	0.240604	0.00076908
ISC/EB-1	LOC5568284	LOC120426535	LOC5568284|AAEL006711	Down	-1.28486	0.197568	0.000197038
ISC/EB-1	LOC5572771	LOC120419015	LOC5572771|AAEL010043	Down	-1.28725	0.184578	0.00027225
ISC/EB-1	LOC5568558	LOC120426561	LOC5568558|AAEL001134	Down	-1.29357	0.211619	0.000552997
ISC/EB-1	LOC5580260	LOC120428483	LOC5580260|AAEL012586	Down	-1.29641	0.192242	0.00036026
ISC/EB-1	LOC5566225	LOC120429962	LOC5566225|AAEL005259	Down	-1.30531	0.173728	0.000411428
ISC/EB-1	LOC5576740	LOC120421197	LOC5576740|AAEL025250	Down	-1.30549	0.126771	7.25697e-05
ISC/EB-1	LOC5563592	LOC120417163	LOC5563592|AAEL000010	Down	-1.32663	0.0192813	1.82239e-08
ISC/EB-1	LOC5564231	LOC120419961	LOC5564231|AAEL004176	Down	-1.32932	0.126401	0.000133911
ISC/EB-1	LOC5577945	LOC128093593	LOC5577945|AAEL019754	Down	-1.33947	0.141563	0.000106
ISC/EB-1	LOC5576170	LOC120420067	LOC5576170|AAEL012359	Down	-1.34402	0.0462078	4.4028e-06
ISC/EB-1	LOC5570794	LOC120414433	LOC5570794|AAEL008569	Down	-1.35964	0.189221	0.000373872
ISC/EB-1	LOC5576221	LOC120416759	LOC5576221|AAEL002833	Down	-1.35977	0.0698679	3.02197e-06
ISC/EB-1	LOC5573894	LOC120425518	LOC5573894|AAEL002184	Down	-1.36136	0.156731	5.0641e-05
ISC/EB-1	LOC5568716	LOC120415152	LOC5568716|AAEL007049	Down	-1.37708	0.175719	0.000184936
ISC/EB-1	LOC5570958	LOC120419384	LOC5570958|AAEL008687	Down	-1.37891	0.19648	0.000226653
ISC/EB-1	LOC5577193	LOC120432226	LOC5577193|AAEL013075	Down	-1.39477	0.183548	0.000395101
ISC/EB-1	LOC5570554	LOC120413667	LOC5570554|AAEL008367	Down	-1.40887	0.205739	0.000372348
ISC/EB-1	LOC5569595	LOC120424318	LOC5569595|AAEL001245	Down	-1.42966	0.192951	0.000238235
ISC/EB-1	LOC5576532	LOC120428729	LOC5576532|AAEL012579	Down	-1.43202	0.178393	0.000245715
ISC/EB-1	LOC5568195	LOC120412687	LOC5568195|AAEL006619	Down	-1.43605	0.150328	0.000185116
ISC/EB-1	LOC5577626	LOC120412842	LOC5577626|AAEL003210	Down	-1.45394	0.152075	0.000108856
ISC/EB-1	LOC5566123	LOC120428064	LOC5566123|AAEL005187	Down	-1.45436	0.203542	0.000171804
ISC/EB-1	LOC5566450	LOC120424570	LOC5566450|AAEL005391	Down	-1.46058	0.172283	0.000156025
ISC/EB-1	LOC5564858	LOC120419578	LOC5564858|AAEL004467	Down	-1.48406	0.162389	0.000105742
ISC/EB-1	LOC5576001	LOC120431377	LOC5576001|AAEL012243	Down	-1.48569	0.142229	0.000153539
ISC/EB-1	LOC5577355	LOC120422722	LOC5577355|AAEL000458	Down	-1.50823	0.130131	6.15861e-05
ISC/EB-1	LOC5565955	LOC120420744	LOC5565955|AAEL005052	Down	-1.52727	0.143471	8.92497e-05
ISC/EB-1	LOC5568387	LOC120422170	LOC5568387|AAEL006771	Down	-1.52757	0.204218	0.000321902
ISC/EB-1	LOC5577591	LOC120425374	LOC5577591|AAEL020476	Down	-1.53598	0.13128	5.09634e-05
ISC/EB-1	LOC5571011	LOC120414897	LOC5571011|AAEL008736	Down	-1.54179	0.193984	0.000179844
ISC/EB-1	LOC110674263	LOC120431936	LOC110674263|AAEL023991	Down	-1.55648	0.192794	0.000146824
ISC/EB-1	LOC5565246	LOC120430753	LOC5565246|AAEL014768	Down	-1.56063	0.195001	0.000286976
ISC/EB-1	LOC5568881	LOC120414135	LOC5568881|AAEL007173	Down	-1.56985	0.169623	0.000119145
ISC/EB-1	LOC5573964	LOC120426341	LOC5573964|AAEL010819	Down	-1.59375	0.0676398	1.27726e-06
ISC/EB-1	LOC5567396	LOC120432162	LOC5567396|AAEL006053	Down	-1.60042	0.0782689	0.000290555
ISC/EB-1	LOC5570550	LOC120413665	LOC5570550|AAEL008363	Down	-1.60193	0.192424	0.00020075
ISC/EB-1	LOC5565261	LOC120427459	LOC5565261|AAEL020830	Down	-1.60404	0.189076	0.000105336
ISC/EB-1	LOC5568880	LOC120414130	LOC5568880|AAEL007184	Down	-1.61595	0.110969	4.89537e-06
ISC/EB-1	LOC110677182	LOC120423401	LOC110677182|-	Down	-1.62195	0.0302776	3.74344e-07
ISC/EB-1	LOC5566166	LOC120414095	LOC5566166|AAEL005221	Down	-1.63088	0.144989	6.21691e-05
ISC/EB-1	LOC5575428	LOC120427650	LOC5575428|AAEL011832	Down	-1.63719	0.129566	7.06148e-05
ISC/EB-1	LOC5573863	LOC120427864	LOC5573863|AAEL010765	Down	-1.6825	0.0610172	8.33306e-07
ISC/EB-1	LOC5573667	LOC120412900	LOC5573667|AAEL010673	Down	-1.77498	0.147658	7.88953e-05
ISC/EB-1	LOC5566220	LOC120429967	LOC5566220|AAEL005270	Down	-1.79333	0.0628608	8.74684e-07
ISC/EB-1	LOC5575426	LOC120420354	LOC5575426|AAEL024454	Down	-1.8128	0.164333	5.41577e-05
ISC/EB-1	LOC23687553	LOC120416502	LOC23687553|AAEL017133	Down	-1.82325	0.219317	0.000232588
ISC/EB-1	LOC5571976	LOC120422443	LOC5571976|AAEL009467	Down	-1.82931	0.124774	4.23268e-06
ISC/EB-1	LOC5571664	LOC120413089	LOC5571664|AAEL024228	Down	-1.83434	0.105933	8.10854e-06
ISC/EB-1	LOC5576008	LOC120431383	LOC5576008|AAEL012237	Down	-1.85007	0.165024	4.75947e-05
ISC/EB-1	LOC23687616	LOC120432411	LOC23687616|AAEL020614	Down	-1.85604	0.202907	1.91514e-05
ISC/EB-1	LOC5576245	LOC120425394	LOC5576245|AAEL002848	Down	-1.9208	0.199146	6.46052e-05
ISC/EB-1	LOC5575714	LOC120416017	LOC5575714|AAEL012023	Down	-1.93587	0.192712	4.13302e-05
ISC/EB-1	LOC5564091	LOC120419272	LOC5564091|AAEL028021	Down	-1.96884	0.0921785	1.12084e-05
ISC/EB-1	LOC5572547	LOC120430775	LOC5572547|AAEL009872	Down	-1.98385	0.171563	0.000109288
ISC/EB-1	LOC5575372	LOC120423229	LOC5575372|AAEL011776	Down	-1.9862	0.15712	5.62678e-05
ISC/EB-1	LOC5566773	LOC120424299	LOC5566773|AAEL005628	Down	-2.02745	0.201362	3.5219e-05
ISC/EB-1	LOC5578162	LOC120420813	LOC5578162|nan	Down	-2.07194	0.198134	5.93226e-05
ISC/EB-1	LOC5564518	LOC120416960	LOC5564518|AAEL019716	Down	-2.08536	0.120616	9.95662e-06
ISC/EB-1	LOC5571775	LOC120424185	LOC5571775|AAEL009291	Down	-2.20718	0.162767	1.10196e-05
ISC/EB-1	LOC5572521	LOC120423940	LOC5572521|AAEL009836	Down	-2.39551	0.16321	4.36067e-05
ISC/EB-1	LOC110678838	LOC120431050	LOC110678838|AAEL017258	Down	-2.44024	0.198612	5.14057e-05
ISC/EB-1	LOC5567329	LOC120424393	LOC5567329|AAEL005997	Down	-2.82344	0.156641	1.91701e-05
ISC/EB-1	LOC110680939	LOC120419970	LOC110680939|AAEL004175	Down	-3.52212	0.0689588	2.78362e-08
ISC/EB-1	LOC110680755	LOC120425631	LOC110680755|AAEL011758	Down	-3.62197	0.0968733	1.09883e-07
ISC/EB-prol	LOC5567341	LOC120419075	LOC5567341|AAEL006011	Up	4.49435	0.0938572	4.37019e-08
ISC/EB-prol	LOC5565962	LOC120419715	LOC5565962|AAEL005220	Up	3.68918	0.0768943	2.02705e-06
ISC/EB-prol	LOC5578793	LOC120421717	LOC5578793|AAEL003676	Up	2.85051	0.0941352	1.30626e-06
ISC/EB-prol	LOC5569950	LOC120419112	LOC5569950|AAEL008039	Up	2.74201	0.0607755	2.306e-07
ISC/EB-prol	LOC5577316	LOC120423507	LOC5577316|AAEL013163	Up	2.74054	0.0732349	8.26665e-07
ISC/EB-prol	LOC5564019	LOC120415564	LOC5564019|AAEL019487	Up	2.65067	0.0665812	8.3709e-05
ISC/EB-prol	LOC5566976	LOC120414546	LOC5566976|AAEL005744	Up	2.52334	0.0937578	7.17238e-07
ISC/EB-prol	LOC5571461	LOC120414849	LOC5571461|AAEL009092	Up	2.45519	0.0780656	2.85148e-06
ISC/EB-prol	LOC5564477	LOC120431110	LOC5564477|AAEL014484	Up	2.45087	0.0885609	2.38494e-07
ISC/EB-prol	LOC5565770	LOC120422559	LOC5565770|AAEL004986	Up	2.39676	0.0777366	3.65141e-07
ISC/EB-prol	LOC5569048	LOC120423136	LOC5569048|AAEL007344	Up	2.37527	0.105301	3.1224e-06
ISC/EB-prol	LOC5568586	LOC120423694	LOC5568586|AAEL001101	Up	2.30569	0.0869255	1.79667e-05
ISC/EB-prol	LOC5576348	LOC120427411	LOC5576348|AAEL002861	Up	2.20562	0.0539855	1.04168e-07
ISC/EB-prol	LOC5566800	LOC120419835	LOC5566800|AAEL005651	Up	2.16495	0.054233	1.05203e-06
ISC/EB-prol	LOC5565108	LOC120414203	LOC5565108|AAEL004586	Up	2.15188	0.062235	1.13622e-06
ISC/EB-prol	LOC5576468	LOC120414150	LOC5576468|AAEL002903	Up	2.14893	0.0965225	1.49613e-06
ISC/EB-prol	LOC5574667	LOC120413933	LOC5574667|AAEL011302	Up	2.13396	0.0385609	1.71669e-08
ISC/EB-prol	LOC5564798	LOC120424117	LOC5564798|AAEL004423	Up	2.12717	0.0593662	5.35814e-07
ISC/EB-prol	LOC5579924	LOC120426496	LOC5579924|AAEL006794	Up	2.10637	0.0680652	0.000113341
ISC/EB-prol	LOC5574649	LOC120430280	LOC5574649|AAEL011293	Up	2.07903	0.10185	1.21726e-06
ISC/EB-prol	LOC5579102	LOC120432665	LOC5579102|AAEL003824	Up	2.00869	0.0842654	4.20913e-06
ISC/EB-prol	LOC5570871	LOC120424644	LOC5570871|AAEL019868	Up	1.99931	0.129672	7.7241e-05
ISC/EB-prol	LOC5578431	LOC120431041	LOC5578431|AAEL000516	Up	1.94752	0.0971771	4.36859e-06
ISC/EB-prol	LOC5578389	LOC120415792	LOC5578389|AAEL013679	Up	1.93709	0.0850794	9.23176e-07
ISC/EB-prol	LOC5568939	LOC120418694	LOC5568939|AAEL007238	Up	1.89393	0.0972717	5.35459e-06
ISC/EB-prol	LOC5565701	LOC120423165	LOC5565701|AAEL014944	Up	1.88066	0.0484918	9.41422e-08
ISC/EB-prol	LOC5568292	LOC120430316	LOC5568292|AAEL006721	Up	1.87635	0.0595793	9.88828e-07
ISC/EB-prol	LOC5565452	LOC120422234	LOC5565452|AAEL000663	Up	1.86471	0.0734515	2.44176e-06
ISC/EB-prol	LOC110677764	LOC120431023	LOC110677764|AAEL024434	Up	1.8621	0.0156679	1.80798e-05
ISC/EB-prol	LOC5579108	LOC120412335	LOC5579108|AAEL003844	Up	1.85213	0.0616005	2.86701e-06
ISC/EB-prol	LOC5576488	LOC120416247	LOC5576488|AAEL002900	Up	1.84718	0.0734855	6.82937e-07
ISC/EB-prol	LOC5572672	LOC120414107	LOC5572672|AAEL001852	Up	1.83856	0.0605483	2.77225e-06
ISC/EB-prol	LOC110678949	LOC120426530	LOC110678949|AAEL022104	Up	1.82776	0.0795701	1.5415e-06
ISC/EB-prol	LOC5566079	LOC120427658	LOC5566079|AAEL015064	Up	1.82146	0.0499944	6.40886e-06
ISC/EB-prol	LOC5565891	LOC120412483	LOC5565891|AAEL000706	Up	1.78838	0.0593013	1.31729e-06
ISC/EB-prol	LOC5569212	LOC120426579	LOC5569212|AAEL019885	Up	1.76896	0.0837282	2.077e-06
ISC/EB-prol	LOC5572372	LOC120422041	LOC5572372|AAEL009760	Up	1.76737	0.073575	2.16098e-06
ISC/EB-prol	LOC5579926	LOC120426499	LOC5579926|AAEL006795	Up	1.7609	0.0757643	5.85097e-06
ISC/EB-prol	LOC5575301	LOC120413747	LOC5575301|AAEL023523	Up	1.74399	0.0825094	3.57141e-06
ISC/EB-prol	LOC5565148	LOC120432052	LOC5565148|AAEL004620	Up	1.7251	0.0628127	1.8315e-06
ISC/EB-prol	LOC5578378	LOC120422052	LOC5578378|AAEL013653	Up	1.72429	0.083663	3.579e-07
ISC/EB-prol	LOC5567141	LOC120422318	LOC5567141|AAEL019742	Up	1.72361	0.0894353	7.06762e-07
ISC/EB-prol	LOC5576246	LOC120425396	LOC5576246|AAEL002853	Up	1.72086	0.0790632	3.39422e-06
ISC/EB-prol	LOC5576470	LOC120414170	LOC5576470|AAEL002918	Up	1.69891	0.0850207	3.52234e-07
ISC/EB-prol	LOC5572983	LOC120418653	LOC5572983|AAEL001919	Up	1.69647	0.0733929	1.36323e-06
ISC/EB-prol	LOC5567097	LOC120418112	LOC5567097|AAEL005839	Up	1.69051	0.0671683	2.86872e-06
ISC/EB-prol	LOC5575338	LOC120415251	LOC5575338|AAEL002615	Up	1.68819	0.0903492	1.59926e-07
ISC/EB-prol	LOC5579964	LOC120423577	LOC5579964|AAEL007595	Up	1.66075	0.0764489	2.33011e-06
ISC/EB-prol	LOC5573583	LOC120421698	LOC5573583|AAEL002130	Up	1.65909	0.0399531	6.04046e-09
ISC/EB-prol	LOC5577042	LOC120432214	LOC5577042|AAEL012964	Up	1.65107	0.0337367	1.25722e-07
ISC/EB-prol	LOC5566973	LOC120414587	LOC5566973|AAEL005728	Up	1.64991	0.078549	1.06477e-06
ISC/EB-prol	LOC5574590	LOC120423849	LOC5574590|AAEL002416	Up	1.63878	0.0721672	0.000186297
ISC/EB-prol	LOC5565307	LOC120423472	LOC5565307|AAEL004716	Up	1.62405	0.0678968	0.000163788
ISC/EB-prol	LOC5572257	LOC120421359	LOC5572257|AAEL009680	Up	1.61691	0.133768	5.69678e-06
ISC/EB-prol	LOC5569518	LOC120419047	LOC5569518|AAEL007704	Up	1.61676	0.0822997	3.12482e-06
ISC/EB-prol	LOC5571127	LOC120419590	LOC5571127|AAEL019751	Up	1.58241	0.0880192	0.000247282
ISC/EB-prol	LOC5574458	LOC120420910	LOC5574458|AAEL011180	Up	1.5711	0.0287914	1.30765e-06
ISC/EB-prol	LOC5566316	LOC128092282	LOC5566316|AAEL005305	Up	1.57042	0.058775	2.84364e-06
ISC/EB-prol	LOC5573813	LOC120415568	LOC5573813|AAEL010731	Up	1.5529	0.0879031	2.78004e-06
ISC/EB-prol	LOC5566824	LOC120414616	LOC5566824|AAEL022609	Up	1.52977	0.0412261	8.37211e-08
ISC/EB-prol	LOC5576215	LOC120416753	LOC5576215|AAEL002832	Up	1.52614	0.0133995	1.65734e-05
ISC/EB-prol	LOC5580160	LOC120419192	LOC5580160|AAEL011397	Up	1.52161	0.0982907	2.40082e-05
ISC/EB-prol	LOC5579278	LOC120419084	LOC5579278|AAEL015631	Up	1.5153	0.0849487	1.75965e-06
ISC/EB-prol	LOC5564769	LOC120423156	LOC5564769|AAEL004438	Up	1.47898	0.0710739	2.12995e-06
ISC/EB-prol	LOC5568247	LOC120420071	LOC5568247|AAEL006663	Up	1.47753	0.09034	3.01166e-06
ISC/EB-prol	LOC5564072	LOC120425024	LOC5564072|AAEL004067	Up	1.45269	0.0547971	1.70555e-06
ISC/EB-prol	LOC5564056	LOC120419865	LOC5564056|AAEL004059	Up	1.45045	0.0343402	3.65777e-05
ISC/EB-prol	LOC5567769	LOC120422152	LOC5567769|AAEL000102	Up	1.44616	0.0495394	0.000105353
ISC/EB-prol	LOC5564921	LOC120423393	LOC5564921|AAEL004500	Up	1.44069	0.0246062	2.17544e-05
ISC/EB-prol	LOC5572224	LOC120418459	LOC5572224|AAEL009658	Up	1.43356	0.0855672	7.77706e-06
ISC/EB-prol	LOC5576360	LOC120426214	LOC5576360|AAEL002860	Up	1.43227	0.0873557	1.66138e-07
ISC/EB-prol	LOC5570068	LOC120423923	LOC5570068|AAEL001331	Up	1.43045	0.0840655	3.53118e-06
ISC/EB-prol	LOC5570996	LOC120414919	LOC5570996|AAEL008723	Up	1.42603	0.0472717	1.13628e-07
ISC/EB-prol	LOC5568076	LOC120417295	LOC5568076|AAEL006520	Up	1.42539	0.0617873	8.60252e-10
ISC/EB-prol	LOC5579041	LOC120420837	LOC5579041|AAEL013989	Up	1.41302	0.0644597	1.25593e-05
ISC/EB-prol	LOC5567342	LOC120419073	LOC5567342|AAEL006006	Up	1.40903	0.0525727	0.000125847
ISC/EB-prol	LOC5573058	LOC120414917	LOC5573058|AAEL010247	Up	1.40222	0.101911	1.5459e-06
ISC/EB-prol	LOC5577674	LOC120423434	LOC5577674|AAEL018259	Up	1.38702	0.0824801	6.49106e-06
ISC/EB-prol	LOC5573069	LOC120414865	LOC5573069|AAEL010256	Up	1.38568	0.0763085	0.000276332
ISC/EB-prol	LOC5574614	LOC120414264	LOC5574614|AAEL011248	Up	1.37864	0.0643111	5.52532e-06
ISC/EB-prol	LOC5580095	LOC120427256	LOC5580095|AAEL002137	Up	1.37572	0.0921492	3.79393e-06
ISC/EB-prol	LOC5565253	LOC120413206	LOC5565253|AAEL004688	Up	1.36155	0.0720455	2.00037e-05
ISC/EB-prol	LOC5573409	LOC120420231	LOC5573409|AAEL026571	Up	1.35839	0.0990865	2.62146e-06
ISC/EB-prol	LOC5573523	LOC120422531	LOC5573523|AAEL024184	Up	1.3503	0.0812648	4.20614e-06
ISC/EB-prol	LOC5576345	LOC120427403	LOC5576345|AAEL002866	Up	1.34241	0.0925791	2.07877e-05
ISC/EB-prol	LOC110676235	LOC120424477	LOC110676235|AAEL022750	Up	1.33715	0.0715427	1.7879e-06
ISC/EB-prol	LOC5569859	LOC120423144	LOC5569859|AAEL007947	Up	1.33299	0.110664	2.87939e-05
ISC/EB-prol	LOC110676279	LOC120415783	LOC110676279|AAEL021140	Up	1.32951	0.0277188	4.79127e-08
ISC/EB-prol	LOC110679716	LOC120423803	LOC110679716|nan	Up	1.31499	0.146868	2.13362e-05
ISC/EB-prol	LOC5571172	LOC120425269	LOC5571172|AAEL008862	Up	1.31293	0.0872906	7.53132e-06
ISC/EB-prol	LOC5574912	LOC120428619	LOC5574912|AAEL002748	Up	1.3123	0.0583655	1.53238e-06
ISC/EB-prol	LOC5570228	LOC120414342	LOC5570228|AAEL008185	Up	1.3117	0.0712853	1.2175e-08
ISC/EB-prol	LOC5566731	LOC120419360	LOC5566731|AAEL005600	Up	1.30948	0.101761	6.11806e-06
ISC/EB-prol	LOC5568801	LOC120425903	LOC5568801|AAEL001190	Up	1.30717	0.0937285	1.17342e-05
ISC/EB-prol	LOC5575183	LOC120425533	LOC5575183|AAEL010445	Up	1.29336	0.0992134	1.12875e-05
ISC/EB-prol	LOC5571506	LOC120419905	LOC5571506|AAEL019988	Up	1.26921	0.0523591	1.5914e-06
ISC/EB-prol	LOC5570175	LOC120422958	LOC5570175|AAEL014154	Up	1.26792	0.097122	8.38801e-06
ISC/EB-prol	LOC110674008	LOC120414487	LOC110674008|AAEL012380	Up	1.26536	0.0974943	1.88141e-06
ISC/EB-prol	LOC5574701	LOC120432583	LOC5574701|AAEL027910	Up	1.24727	0.0565451	3.49693e-07
ISC/EB-prol	LOC5575264	LOC120432235	LOC5575264|AAEL011718	Up	1.22064	0.109122	1.51077e-05
ISC/EB-prol	LOC5579186	LOC120415419	LOC5579186|AAEL003872	Up	1.21253	0.015992	2.72535e-05
ISC/EB-prol	LOC5570648	LOC120424297	LOC5570648|AAEL008468	Up	1.20154	0.0668135	4.48449e-07
ISC/EB-prol	LOC5575831	LOC120432217	LOC5575831|AAEL012099	Up	1.20128	0.0399297	1.4678e-06
ISC/EB-prol	LOC5572627	LOC120421965	LOC5572627|AAEL009946	Up	1.19849	0.0786953	1.59779e-06
ISC/EB-prol	LOC5575137	LOC120420657	LOC5575137|AAEL000378	Up	1.19394	0.0745728	2.72522e-06
ISC/EB-prol	LOC5567836	LOC120427265	LOC5567836|AAEL001009	Up	1.18933	0.0622411	1.03437e-05
ISC/EB-prol	LOC5575813	LOC120414018	LOC5575813|AAEL012069	Up	1.17533	0.0513659	1.87757e-06
ISC/EB-prol	LOC5579187	LOC120415396	LOC5579187|AAEL003873	Up	1.167	0.0680869	0.000349858
ISC/EB-prol	LOC5573319	LOC120422563	LOC5573319|AAEL010403	Up	1.16399	0.0692164	3.46264e-06
ISC/EB-prol	LOC5574214	LOC120424647	LOC5574214|AAEL024525	Up	1.16157	0.0761679	9.90928e-06
ISC/EB-prol	LOC5565048	LOC120425481	LOC5565048|AAEL004567	Up	1.15453	0.0386012	1.58102e-08
ISC/EB-prol	LOC5568403	LOC120424292	LOC5568403|AAEL006820	Up	1.15403	0.0377135	1.35303e-06
ISC/EB-prol	LOC5575822	LOC120430654	LOC5575822|AAEL012092	Up	1.1525	0.0724561	2.02444e-05
ISC/EB-prol	LOC5579113	LOC120412363	LOC5579113|AAEL003817	Up	1.14319	0.0841308	2.63105e-05
ISC/EB-prol	LOC5567160	LOC120422268	LOC5567160|AAEL005910	Up	1.13805	0.0665685	2.71291e-09
ISC/EB-prol	LOC110675610	LOC128093535	LOC110675610|AAEL026008	Up	1.11518	0.0276912	2.59346e-07
ISC/EB-prol	LOC5579326	LOC120428998	LOC5579326|AAEL015575	Up	1.11325	0.0898202	7.73473e-06
ISC/EB-prol	LOC5564781	LOC120423155	LOC5564781|AAEL004419	Up	1.10796	0.0736086	4.60044e-06
ISC/EB-prol	LOC5564925	LOC120423392	LOC5564925|AAEL019568	Up	1.1008	0.0225172	5.05756e-07
ISC/EB-prol	LOC5567305	LOC120412527	LOC5567305|AAEL005956	Up	1.09343	0.0693425	6.39423e-06
ISC/EB-prol	LOC5579837	LOC120419941	LOC5579837|AAEL005846	Up	1.09157	0.0908544	1.4762e-05
ISC/EB-prol	LOC5566087	LOC120426437	LOC5566087|AAEL005165	Up	1.0882	0.0291608	5.4242e-07
ISC/EB-prol	LOC110678029	LOC120428187	LOC110678029|AAEL021557	Up	1.08804	0.116106	3.01625e-06
ISC/EB-prol	LOC5564126	LOC120423804	LOC5564126|nan	Up	1.08415	0.0662191	2.54188e-05
ISC/EB-prol	LOC5578659	LOC120426447	LOC5578659|AAEL013808	Up	1.0813	0.0820186	1.46964e-05
ISC/EB-prol	LOC5565667	LOC120415744	LOC5565667|AAEL004900	Up	1.07912	0.0855592	7.13827e-06
ISC/EB-prol	LOC5570419	LOC120427968	LOC5570419|AAEL008306	Up	1.07791	0.0784105	7.87653e-06
ISC/EB-prol	LOC23687501	LOC120432248	LOC23687501|AAEL017081	Up	1.07765	0.0605183	1.75319e-05
ISC/EB-prol	LOC5570070	LOC120423588	LOC5570070|AAEL001352	Up	1.0666	0.0923404	2.08427e-05
ISC/EB-prol	LOC5564588	LOC120415858	LOC5564588|AAEL004329	Up	1.06553	0.101467	6.78194e-06
ISC/EB-prol	LOC5578293	LOC120427315	LOC5578293|AAEL022819	Up	1.0652	0.0603073	1.51431e-06
ISC/EB-prol	LOC5576104	LOC120417444	LOC5576104|AAEL002777	Up	1.06192	0.0735798	5.27899e-05
ISC/EB-prol	LOC5567311	LOC120416264	LOC5567311|AAEL005965	Up	1.06152	0.0771305	2.17546e-05
ISC/EB-prol	LOC5579871	LOC120423012	LOC5579871|AAEL005985	Up	1.06008	0.0464535	1.91044e-06
ISC/EB-prol	LOC5574966	LOC120416916	LOC5574966|AAEL002527	Up	1.05421	0.0419339	3.27408e-06
ISC/EB-prol	LOC5574502	LOC120428621	LOC5574502|AAEL002375	Up	1.05259	0.0995939	0.000634036
ISC/EB-prol	LOC5564916	LOC120419350	LOC5564916|AAEL014657	Up	1.04867	0.087165	0.000583755
ISC/EB-prol	LOC5567037	LOC120424516	LOC5567037|AAEL005790	Up	1.04687	0.0619946	1.43841e-06
ISC/EB-prol	LOC5570050	LOC120416623	LOC5570050|AAEL000185	Up	1.04363	0.0394565	2.39053e-06
ISC/EB-prol	LOC5577095	LOC120416730	LOC5577095|AAEL012994	Up	1.04154	0.0907928	7.83932e-06
ISC/EB-prol	LOC5564363	LOC120430841	LOC5564363|AAEL021301	Up	1.04063	0.0525301	5.6858e-06
ISC/EB-prol	LOC5576333	LOC120417045	LOC5576333|AAEL000388	Up	1.03786	0.083166	5.43452e-06
ISC/EB-prol	LOC5569288	LOC120424188	LOC5569288|AAEL007547	Up	1.03411	0.0581346	5.49492e-06
ISC/EB-prol	LOC5573751	LOC120415314	LOC5573751|AAEL000294	Up	1.0329	0.0447755	3.62545e-06
ISC/EB-prol	LOC5570810	LOC120424707	LOC5570810|AAEL008574	Up	1.02566	0.0877084	3.13176e-05
ISC/EB-prol	LOC5573328	LOC120429164	LOC5573328|AAEL010411	Up	1.01316	0.041932	1.67019e-07
ISC/EB-prol	LOC5577902	LOC120421985	LOC5577902|AAEL026782	Up	1.00911	0.0967203	7.3487e-05
ISC/EB-prol	LOC5563827	LOC120422953	LOC5563827|AAEL014161	Up	1.00825	0.0888776	8.15558e-06
ISC/EB-prol	LOC5568914	LOC120422026	LOC5568914|AAEL007209	Up	0.997551	0.0783437	5.05079e-05
ISC/EB-prol	LOC5569750	LOC120418133	LOC5569750|AAEL007915	Up	0.996078	0.0373136	8.54019e-07
ISC/EB-prol	LOC23687659	LOC120422049	LOC23687659|AAEL026894	Up	0.992749	0.0963695	4.02303e-05
ISC/EB-prol	LOC5572931	LOC120431162	LOC5572931|AAEL010145	Up	0.989035	0.0543279	1.82145e-05
ISC/EB-prol	LOC5566136	LOC120428068	LOC5566136|AAEL005206	Up	0.987952	0.0726056	1.67101e-05
ISC/EB-prol	LOC5569267	LOC120416851	LOC5569267|AAEL007509	Up	0.983943	0.0914585	1.0755e-05
ISC/EB-prol	LOC5571016	LOC120418452	LOC5571016|AAEL008739	Up	0.983405	0.0755359	3.43913e-05
ISC/EB-prol	LOC5567538	LOC120423950	LOC5567538|AAEL006144	Up	0.981772	0.110281	4.12381e-05
ISC/EB-prol	LOC5577139	LOC120415802	LOC5577139|AAEL003125	Up	0.976591	0.0915507	6.82718e-05
ISC/EB-prol	LOC5574634	LOC120430848	LOC5574634|AAEL020739	Up	0.975761	0.0442414	6.5111e-07
ISC/EB-prol	LOC5564400	LOC120417677	LOC5564400|AAEL004235	Up	0.973606	0.0903495	1.0878e-05
ISC/EB-prol	LOC5564552	LOC120417656	LOC5564552|AAEL004311	Up	0.971995	0.0697044	0.000369094
ISC/EB-prol	LOC5579853	LOC120414981	LOC5579853|AAEL005845	Up	0.963827	0.0567102	3.01671e-06
ISC/EB-prol	LOC5580070	LOC120414540	LOC5580070|AAEL002160	Up	0.963533	0.0461848	2.09058e-05
ISC/EB-prol	LOC5571319	LOC120419469	LOC5571319|AAEL008961	Up	0.961982	0.0918679	1.92621e-05
ISC/EB-prol	LOC5571825	LOC120429259	LOC5571825|AAEL001698	Up	0.957098	0.0476638	0.00015837
ISC/EB-prol	LOC5580280	LOC120415004	LOC5580280|AAEL003006	Up	0.95686	0.0474649	3.17218e-06
ISC/EB-prol	LOC5571281	LOC120422888	LOC5571281|AAEL001583	Up	0.955628	0.0970281	5.54521e-05
ISC/EB-prol	LOC5569504	LOC120428091	LOC5569504|AAEL018144	Up	0.950932	0.0692899	0.000405075
ISC/EB-prol	LOC5570921	LOC120422981	LOC5570921|AAEL001495	Up	0.949177	0.0888816	4.56265e-05
ISC/EB-prol	LOC5569782	LOC120415125	LOC5569782|AAEL007920	Up	0.945618	0.0533159	3.10758e-06
ISC/EB-prol	LOC5566233	LOC120430176	LOC5566233|AAEL005258	Up	0.945541	0.0706553	7.67932e-13
ISC/EB-prol	LOC5566864	LOC120421877	LOC5566864|AAEL000847	Up	0.944812	0.0696138	0.000348955
ISC/EB-prol	LOC5565563	LOC120416488	LOC5565563|AAEL004832	Up	0.94457	0.085209	4.78587e-05
ISC/EB-prol	LOC5573604	LOC120422062	LOC5573604|AAEL002108	Up	0.941074	0.095587	5.04932e-05
ISC/EB-prol	LOC5569269	LOC120415460	LOC5569269|AAEL007518	Up	0.938196	0.0958981	9.39666e-05
ISC/EB-prol	LOC5580293	LOC120418324	LOC5580293|AAEL020634	Up	0.938083	0.0977379	3.5036e-05
ISC/EB-prol	LOC5572532	LOC120416048	LOC5572532|AAEL009863	Up	0.933177	0.0847102	2.32926e-05
ISC/EB-prol	LOC5576764	LOC120415884	LOC5576764|AAEL012750	Up	0.928542	0.0665055	1.33684e-05
ISC/EB-prol	LOC5567858	LOC120423203	LOC5567858|AAEL006321	Up	0.928032	0.0966998	1.66246e-05
ISC/EB-prol	LOC5578146	LOC120427119	LOC5578146|AAEL013527	Up	0.927884	0.0631083	3.48468e-06
ISC/EB-prol	LOC5564392	LOC120414529	LOC5564392|AAEL004234	Up	0.925215	0.0461278	1.69601e-06
ISC/EB-prol	LOC5578458	LOC120414003	LOC5578458|AAEL000523	Up	0.924405	0.100074	7.52651e-05
ISC/EB-prol	LOC5570347	LOC120417460	LOC5570347|AAEL001389	Up	0.917696	0.101388	6.76823e-05
ISC/EB-prol	LOC5569936	LOC120422532	LOC5569936|AAEL008025	Up	0.917281	0.0786525	5.32808e-05
ISC/EB-prol	LOC5580074	LOC120429017	LOC5580074|AAEL002178	Up	0.912422	0.069407	0.000402204
ISC/EB-prol	LOC5572008	LOC120412825	LOC5572008|AAEL009483	Up	0.911548	0.0703283	0.000387579
ISC/EB-prol	LOC5574463	LOC120420909	LOC5574463|AAEL011178	Up	0.905742	0.101472	4.84519e-05
ISC/EB-prol	LOC5577524	LOC120423846	LOC5577524|AAEL003203	Up	0.903963	0.0410183	7.39979e-06
ISC/EB-prol	LOC5576472	LOC120414167	LOC5576472|AAEL002886	Up	0.901218	0.0328388	6.22499e-05
ISC/EB-prol	LOC23687735	LOC120425958	LOC23687735|AAEL017315	Up	0.900757	0.0443423	4.16677e-06
ISC/EB-prol	LOC23687644	LOC120413114	LOC23687644|AAEL017224	Up	0.9005	0.0915069	0.000151459
ISC/EB-prol	LOC5563548	LOC120426682	LOC5563548|AAEL021708	Up	0.900032	0.104492	2.37694e-05
ISC/EB-prol	LOC5572430	LOC120416280	LOC5572430|AAEL001830	Up	0.898784	0.104421	0.000232533
ISC/EB-prol	LOC5565670	LOC120416564	LOC5565670|AAEL014931	Up	0.895351	0.0575825	2.33146e-05
ISC/EB-prol	LOC5573878	LOC120417877	LOC5573878|AAEL010799	Up	0.894779	0.113102	2.60178e-05
ISC/EB-prol	LOC5573046	LOC120417911	LOC5573046|AAEL010224	Up	0.891874	0.103091	3.11327e-05
ISC/EB-prol	LOC5566610	LOC120420423	LOC5566610|AAEL027504	Up	0.89003	0.0956705	6.30583e-05
ISC/EB-prol	LOC5569380	LOC120422792	LOC5569380|AAEL007558	Up	0.888788	0.109184	0.000112894
ISC/EB-prol	LOC5574250	LOC120432564	LOC5574250|AAEL011017	Up	0.888032	0.105797	3.69147e-05
ISC/EB-prol	LOC5567454	LOC120418946	LOC5567454|AAEL000944	Up	0.883208	0.0812591	3.83173e-05
ISC/EB-prol	LOC5575633	LOC120426820	LOC5575633|AAEL011967	Up	0.88092	0.107788	3.61107e-05
ISC/EB-prol	LOC5568583	LOC120423682	LOC5568583|AAEL001113	Up	0.880715	0.0768125	0.000509293
ISC/EB-prol	LOC5569590	LOC128092258	LOC5569590|AAEL001247	Up	0.879545	0.0547039	1.14889e-05
ISC/EB-prol	LOC5572316	LOC120417902	LOC5572316|AAEL009708	Up	0.879115	0.0872876	4.81836e-05
ISC/EB-prol	LOC5577025	LOC120418977	LOC5577025|AAEL012932	Up	0.876511	0.105203	2.49504e-05
ISC/EB-prol	LOC5580320	LOC120419848	LOC5580320|AAEL019791	Up	0.876422	0.103567	1.27199e-05
ISC/EB-prol	LOC5578684	LOC120423295	LOC5578684|AAEL003645	Up	0.876357	0.0324264	1.27274e-08
ISC/EB-prol	LOC5564609	LOC120425390	LOC5564609|AAEL014531	Up	0.872049	0.0652895	4.46745e-06
ISC/EB-prol	LOC5570057	LOC120416626	LOC5570057|AAEL000184	Up	0.867617	0.113595	4.35092e-05
ISC/EB-prol	LOC5580192	LOC120427397	LOC5580192|AAEL002551	Up	0.860903	0.055099	1.2522e-06
ISC/EB-prol	LOC5574363	LOC120425445	LOC5574363|AAEL011081	Up	0.860895	0.100391	8.60455e-05
ISC/EB-prol	LOC5574299	LOC120421458	LOC5574299|AAEL011067	Up	0.860887	0.0720071	5.99859e-05
ISC/EB-prol	LOC5575181	LOC120412810	LOC5575181|AAEL000370	Up	0.859236	0.0855196	0.000671943
ISC/EB-prol	LOC5580058	LOC120414541	LOC5580058|AAEL002155	Up	0.857868	0.0657409	1.07299e-06
ISC/EB-prol	LOC5577988	LOC120423534	LOC5577988|AAEL018039	Up	0.855087	0.0917676	0.000116998
ISC/EB-prol	LOC5574240	LOC120419546	LOC5574240|AAEL011007	Up	0.854622	0.102921	8.53298e-06
ISC/EB-prol	LOC5569925	LOC120421420	LOC5569925|AAEL027654	Up	0.854203	0.1142	0.000135247
ISC/EB-prol	LOC5576765	LOC120415355	LOC5576765|AAEL012746	Up	0.85359	0.0419995	0.00022921
ISC/EB-prol	LOC5571141	LOC120426507	LOC5571141|AAEL019603	Up	0.85094	0.0855262	5.37334e-05
ISC/EB-prol	LOC5578454	LOC120413988	LOC5578454|AAEL000488	Up	0.850482	0.0751091	1.81991e-05
ISC/EB-prol	LOC5568498	LOC120413065	LOC5568498|AAEL006912	Up	0.847267	0.0690255	0.000408317
ISC/EB-prol	LOC5577250	LOC120424142	LOC5577250|AAEL027982	Up	0.845029	0.0824846	3.75626e-05
ISC/EB-prol	LOC5566229	LOC120422061	LOC5566229|AAEL005271	Up	0.844849	0.0604334	1.68343e-05
ISC/EB-prol	LOC5570893	LOC120413530	LOC5570893|AAEL019550	Up	0.842763	0.0894597	1.78688e-05
ISC/EB-prol	LOC5569174	LOC120412594	LOC5569174|AAEL007414	Up	0.84066	0.108299	0.000107258
ISC/EB-prol	LOC5578311	LOC120413732	LOC5578311|AAEL008084	Up	0.840051	0.0691341	1.26466e-05
ISC/EB-prol	LOC5571208	LOC120418156	LOC5571208|AAEL008893	Up	0.83935	0.0626227	1.07776e-05
ISC/EB-prol	LOC5564792	LOC120423151	LOC5564792|AAEL004445	Up	0.834873	0.0770512	9.45794e-05
ISC/EB-prol	LOC5579494	LOC120425113	LOC5579494|AAEL015271	Up	0.834601	0.0698349	6.2595e-06
ISC/EB-prol	LOC5568556	LOC120426571	LOC5568556|AAEL001126	Up	0.833974	0.0714116	0.000550846
ISC/EB-prol	LOC5579214	LOC120424947	LOC5579214|AAEL014055	Up	0.831983	0.112769	0.000123925
ISC/EB-prol	LOC5573710	LOC120424972	LOC5573710|AAEL019460	Up	0.831028	0.104332	0.000106014
ISC/EB-prol	LOC5572255	LOC120421354	LOC5572255|AAEL009681	Up	0.825799	0.0529623	4.35092e-06
ISC/EB-prol	LOC5565249	LOC120413617	LOC5565249|AAEL014771	Up	0.819757	0.103576	6.51426e-05
ISC/EB-prol	LOC5572208	LOC120413390	LOC5572208|AAEL009606	Up	0.815978	0.100533	5.18459e-05
ISC/EB-prol	LOC5579902	LOC120429898	LOC5579902|AAEL001044	Up	0.811226	0.0657892	1.64556e-05
ISC/EB-prol	LOC5567972	LOC120422403	LOC5567972|AAEL006415	Up	0.809825	0.0894067	6.11554e-05
ISC/EB-prol	LOC5574542	LOC120418667	LOC5574542|AAEL011216	Up	0.807429	0.0602867	1.74723e-05
ISC/EB-prol	LOC5571932	LOC120423256	LOC5571932|AAEL009387	Up	0.806474	0.0581021	6.21038e-06
ISC/EB-prol	LOC5571294	LOC120424430	LOC5571294|AAEL001582	Up	0.805563	0.0890765	4.48868e-05
ISC/EB-prol	LOC5574178	LOC120429776	LOC5574178|AAEL019806	Up	0.805209	0.100615	4.59192e-06
ISC/EB-prol	LOC5567506	LOC120430963	LOC5567506|AAEL006113	Up	0.801848	0.111714	8.03757e-05
ISC/EB-prol	LOC5569093	LOC120413765	LOC5569093|AAEL007354	Up	0.798368	0.10456	7.1974e-05
ISC/EB-prol	LOC5574089	LOC120416552	LOC5574089|AAEL002272	Up	0.797332	0.104199	7.64974e-05
ISC/EB-prol	LOC5577278	LOC120415206	LOC5577278|AAEL027786	Up	0.792259	0.0741503	8.54328e-05
ISC/EB-prol	LOC5567242	LOC120429230	LOC5567242|AAEL000883	Up	0.785383	0.0584719	1.03528e-05
ISC/EB-prol	LOC5568477	LOC120419490	LOC5568477|AAEL006883	Up	0.781258	0.0784976	6.58141e-06
ISC/EB-prol	LOC5575706	LOC120412615	LOC5575706|AAEL012014	Up	0.775833	0.0558004	3.01944e-06
ISC/EB-prol	LOC5564181	LOC120424392	LOC5564181|AAEL004131	Up	0.774533	0.0849878	3.42439e-05
ISC/EB-prol	LOC5577268	LOC120424487	LOC5577268|AAEL013128	Up	0.774482	0.0546592	6.60021e-06
ISC/EB-prol	LOC5577697	LOC120429673	LOC5577697|AAEL013334	Up	0.766849	0.0788438	5.61476e-05
ISC/EB-prol	LOC5566143	LOC120428073	LOC5566143|AAEL005213	Up	0.764516	0.0336148	1.30526e-06
ISC/EB-prol	LOC5569178	LOC120417356	LOC5569178|AAEL007452	Up	0.76086	0.101083	2.82546e-05
ISC/EB-prol	LOC5579990	LOC120427559	LOC5579990|AAEL001742	Up	0.759099	0.0959618	2.59056e-05
ISC/EB-prol	LOC5572280	LOC120426777	LOC5572280|AAEL001749	Up	0.75576	0.0857504	1.82474e-05
ISC/EB-prol	LOC5575820	LOC120430655	LOC5575820|AAEL012093	Up	0.755156	0.0979852	0.000115722
ISC/EB-prol	LOC5579847	LOC120415003	LOC5579847|AAEL019982	Up	0.753813	0.0688441	2.57203e-05
ISC/EB-prol	LOC5568481	LOC120419503	LOC5568481|AAEL006879	Up	0.74939	0.0571885	4.81937e-06
ISC/EB-prol	LOC5571854	LOC120422402	LOC5571854|AAEL009345	Up	0.748635	0.0435202	3.06856e-06
ISC/EB-prol	LOC5580279	LOC120413876	LOC5580279|AAEL002986	Up	0.736474	0.104807	7.26693e-05
ISC/EB-prol	LOC5572049	LOC120422162	LOC5572049|AAEL000245	Up	0.72421	0.0792903	3.14902e-05
ISC/EB-prol	LOC5566822	LOC120414643	LOC5566822|AAEL005666	Up	0.722617	0.0631433	1.23907e-05
ISC/EB-prol	LOC5574197	LOC120422673	LOC5574197|AAEL002296	Up	0.717372	0.0608904	1.61614e-05
ISC/EB-prol	LOC5574369	LOC120425451	LOC5574369|AAEL011087	Up	0.716133	0.0955376	0.000151549
ISC/EB-prol	LOC5567857	LOC120423201	LOC5567857|AAEL006315	Up	0.706088	0.0877431	6.14188e-05
ISC/EB-prol	LOC5571571	LOC120417779	LOC5571571|AAEL009160	Up	0.705021	0.0337909	9.28826e-05
ISC/EB-prol	LOC5567448	LOC120415213	LOC5567448|AAEL006091	Up	0.70414	0.0706032	1.67811e-05
ISC/EB-prol	LOC5575004	LOC120424690	LOC5575004|AAEL024950	Up	0.702333	0.0900223	0.000157525
ISC/EB-prol	LOC5568319	LOC120430112	LOC5568319|AAEL006727	Up	0.696208	0.0849662	0.000949632
ISC/EB-prol	LOC5567162	LOC120421712	LOC5567162|AAEL005914	Up	0.69587	0.0889918	0.000186954
ISC/EB-prol	LOC5578345	LOC128092883	LOC5578345|AAEL003509	Up	0.695001	0.10215	0.000141431
ISC/EB-prol	LOC5567931	LOC120427228	LOC5567931|AAEL006367	Up	0.69207	0.0963518	0.000113858
ISC/EB-prol	LOC5570218	LOC120414344	LOC5570218|AAEL008153	Up	0.690828	0.0843449	0.000166281
ISC/EB-prol	LOC5567419	LOC120420759	LOC5567419|AAEL006066	Up	0.688606	0.0941341	0.000102933
ISC/EB-prol	LOC5577342	LOC120422707	LOC5577342|AAEL000469	Up	0.686122	0.0997167	0.000389996
ISC/EB-prol	LOC5566301	LOC120430231	LOC5566301|AAEL005293	Up	0.684892	0.0487244	1.49984e-05
ISC/EB-prol	LOC5567964	LOC120422404	LOC5567964|AAEL006425	Up	0.684274	0.0607788	1.77758e-06
ISC/EB-prol	LOC5573849	LOC120428265	LOC5573849|AAEL010766	Up	0.684252	0.0795433	0.000160695
ISC/EB-prol	LOC5570318	LOC120414302	LOC5570318|AAEL008257	Up	0.679303	0.0391047	2.90172e-06
ISC/EB-prol	LOC5576238	LOC120431031	LOC5576238|AAEL002840	Up	0.678002	0.123044	0.000454932
ISC/EB-prol	LOC5570916	LOC120422983	LOC5570916|AAEL001501	Up	0.676881	0.0618675	1.54746e-05
ISC/EB-prol	LOC5576552	LOC120418910	LOC5576552|AAEL012610	Up	0.676207	0.0941932	0.000129377
ISC/EB-prol	LOC5568166	LOC120418691	LOC5568166|AAEL006609	Up	0.673983	0.0570233	3.10086e-05
ISC/EB-prol	LOC5566142	LOC120428067	LOC5566142|AAEL005175	Up	0.673427	0.0824321	0.00114929
ISC/EB-prol	LOC5574739	LOC120421108	LOC5574739|AAEL011369	Up	0.672525	0.0728406	5.53194e-05
ISC/EB-prol	LOC5566808	LOC120418610	LOC5566808|AAEL005655	Up	0.671804	0.0715895	1.9876e-05
ISC/EB-prol	LOC5570080	LOC120417658	LOC5570080|AAEL001336	Up	0.668955	0.0499658	4.19206e-06
ISC/EB-prol	LOC5578151	LOC120431189	LOC5578151|AAEL013537	Up	0.667995	0.0909648	0.000122539
ISC/EB-prol	LOC5567091	LOC120413181	LOC5567091|AAEL012313	Up	0.667941	0.0435445	1.31942e-06
ISC/EB-prol	LOC5575108	LOC120427997	LOC5575108|AAEL011665	Up	0.666909	0.0652556	2.41675e-05
ISC/EB-prol	LOC5576587	LOC120413330	LOC5576587|AAEL002933	Up	0.660218	0.0817462	4.82e-05
ISC/EB-prol	LOC5573515	LOC120422536	LOC5573515|AAEL010561	Up	0.659696	0.10187	0.000221046
ISC/EB-prol	LOC5579183	LOC120413678	LOC5579183|AAEL003901	Up	0.657942	0.0528091	1.86298e-05
ISC/EB-prol	LOC5566585	LOC120414870	LOC5566585|AAEL000759	Up	0.656879	0.0658128	3.08953e-05
ISC/EB-prol	LOC110681196	LOC120415681	LOC110681196|AAEL017135	Up	0.65677	0.0754787	7.38163e-05
ISC/EB-prol	LOC5574348	LOC120423776	LOC5574348|AAEL002350	Up	0.656256	0.0907808	8.6937e-05
ISC/EB-prol	LOC5563780	LOC120413783	LOC5563780|AAEL019562	Up	0.654217	0.0748032	1.57439e-05
ISC/EB-prol	LOC5566352	LOC120428816	LOC5566352|AAEL028119	Up	0.653764	0.0997032	0.000160446
ISC/EB-prol	LOC5567528	LOC120414438	LOC5567528|AAEL006129	Up	0.649051	0.0635578	8.0437e-05
ISC/EB-prol	LOC5565556	LOC120430777	LOC5565556|AAEL004835	Up	0.645757	0.0931351	0.000101646
ISC/EB-prol	LOC5572295	LOC120423616	LOC5572295|AAEL007800	Up	0.645746	0.0972562	8.03172e-05
ISC/EB-prol	LOC5572753	LOC120424863	LOC5572753|AAEL010018	Up	0.640573	0.037058	0.00015002
ISC/EB-prol	LOC5575702	LOC120412597	LOC5575702|AAEL012016	Up	0.630194	0.0947172	8.44415e-05
ISC/EB-prol	LOC5566763	LOC120425053	LOC5566763|AAEL012410	Up	0.630036	0.072698	0.000902935
ISC/EB-prol	LOC5572335	LOC120427148	LOC5572335|AAEL009719	Up	0.628449	0.0628958	4.99559e-05
ISC/EB-prol	LOC5571898	LOC120414348	LOC5571898|AAEL009381	Up	0.624094	0.104968	0.000243327
ISC/EB-prol	LOC5568302	LOC120430349	LOC5568302|AAEL006741	Up	0.622857	0.0377128	1.65635e-06
ISC/EB-prol	LOC5565854	LOC120432423	LOC5565854|AAEL005037	Up	0.621882	0.074167	9.24027e-05
ISC/EB-prol	LOC5565050	LOC120428781	LOC5565050|AAEL004546	Up	0.616378	0.0906362	3.03276e-05
ISC/EB-prol	LOC5572923	LOC120413536	LOC5572923|AAEL010146	Up	0.6152	0.0516597	1.38377e-06
ISC/EB-prol	LOC5564399	LOC120417697	LOC5564399|AAEL004227	Up	0.611919	0.0594324	1.30883e-05
ISC/EB-prol	LOC5578625	LOC120417714	LOC5578625|AAEL003582	Up	0.611737	0.0124813	2.32503e-07
ISC/EB-prol	LOC5575011	LOC120415894	LOC5575011|AAEL011564	Up	0.610381	0.0444796	1.85777e-05
ISC/EB-prol	LOC5577098	LOC120416722	LOC5577098|AAEL012987	Up	0.609644	0.114192	0.000309859
ISC/EB-prol	LOC5572463	LOC120416771	LOC5572463|AAEL001798	Up	0.608666	0.052262	9.73826e-06
ISC/EB-prol	LOC5568659	LOC120423429	LOC5568659|AAEL007019	Up	0.607406	0.0387995	2.21494e-05
ISC/EB-prol	LOC5566687	LOC120423891	LOC5566687|AAEL005558	Up	0.603932	0.0317128	5.62185e-06
ISC/EB-prol	LOC5577997	LOC120423976	LOC5577997|AAEL003385	Up	0.603626	0.0590826	9.91544e-05
ISC/EB-prol	LOC23687882	LOC120428391	LOC23687882|AAEL017462	Up	0.600195	0.0894056	0.000145251
ISC/EB-prol	LOC5570932	LOC120414728	LOC5570932|AAEL008671	Up	0.6	0.043482	2.34602e-07
ISC/EB-prol	LOC5572265	LOC120413389	LOC5572265|AAEL001769	Up	0.598562	0.0886224	8.18632e-05
ISC/EB-prol	LOC5571202	LOC120420332	LOC5571202|AAEL008902	Up	0.597427	0.102174	0.000132928
ISC/EB-prol	LOC5568418	LOC120423196	LOC5568418|AAEL006847	Up	0.591896	0.0809561	7.4324e-05
ISC/EB-prol	LOC5573217	LOC120428260	LOC5573217|AAEL010299	Up	0.581738	0.0117998	2.98616e-08
ISC/EB-prol	LOC5576629	LOC120417805	LOC5576629|AAEL012658	Up	0.579436	0.0962241	0.00027719
ISC/EB-prol	LOC5566936	LOC120417336	LOC5566936|AAEL005699	Up	0.57936	0.0721757	4.31934e-05
ISC/EB-prol	LOC5569604	LOC120418532	LOC5569604|AAEL001275	Up	0.578758	0.0552189	2.72189e-05
ISC/EB-prol	LOC5568046	LOC120416155	LOC5568046|AAEL006483	Up	0.577237	0.0676018	9.13e-06
ISC/EB-prol	LOC5578798	LOC120418171	LOC5578798|AAEL003698	Up	0.573653	0.0968705	0.000294429
ISC/EB-prol	LOC5573260	LOC120424703	LOC5573260|AAEL010359	Up	0.571675	0.0699043	4.09241e-06
ISC/EB-prol	LOC5575098	LOC120427002	LOC5575098|AAEL011652	Up	0.571097	0.0898301	0.00124
ISC/EB-prol	LOC5567961	LOC120422417	LOC5567961|AAEL006420	Up	0.570952	0.059724	2.60689e-05
ISC/EB-prol	LOC5574311	LOC120420147	LOC5574311|AAEL011069	Up	0.568888	0.0855424	0.000114833
ISC/EB-prol	LOC5574731	LOC120421103	LOC5574731|AAEL011371	Up	0.565315	0.043788	8.14742e-06
ISC/EB-prol	LOC5570147	LOC120420952	LOC5570147|AAEL008128	Up	0.562257	0.0595197	8.90236e-05
ISC/EB-prol	LOC5567531	LOC120414336	LOC5567531|AAEL027977	Up	0.561212	0.114383	0.000409147
ISC/EB-prol	LOC5564525	LOC120412679	LOC5564525|AAEL014492	Up	0.559539	0.092437	0.00029388
ISC/EB-prol	LOC5577905	LOC120423982	LOC5577905|AAEL020615	Up	0.5494	0.0702138	5.69126e-05
ISC/EB-prol	LOC5575274	LOC120425130	LOC5575274|AAEL011746	Up	0.549048	0.0419227	0.000307608
ISC/EB-prol	LOC5575848	LOC120412505	LOC5575848|AAEL012113	Up	0.54875	0.0480584	1.91413e-05
ISC/EB-prol	LOC5572078	LOC120432427	LOC5572078|AAEL001709	Up	0.54768	0.0944879	0.000310681
ISC/EB-prol	LOC5573418	LOC120418020	LOC5573418|AAEL002083	Up	0.546621	0.024784	1.41686e-06
ISC/EB-prol	LOC5571645	LOC120428542	LOC5571645|AAEL001636	Up	0.538372	0.0602332	3.1182e-05
ISC/EB-prol	LOC110676984	LOC120421126	LOC110676984|AAEL010348	Up	0.537253	0.0941728	0.000312213
ISC/EB-prol	LOC5568449	LOC120415208	LOC5568449|AAEL006870	Up	0.534907	0.10866	0.000286664
ISC/EB-prol	LOC5570877	LOC120421496	LOC5570877|AAEL008656	Up	0.531622	0.0816318	8.53843e-05
ISC/EB-prol	LOC5570017	LOC120419562	LOC5570017|AAEL000208	Up	0.526639	0.0628045	8.08337e-05
ISC/EB-prol	LOC5577205	LOC120420207	LOC5577205|AAEL027164	Up	0.521522	0.0897306	6.67105e-05
ISC/EB-prol	LOC5565647	LOC120415739	LOC5565647|AAEL004913	Up	0.519946	0.0655666	4.50504e-05
ISC/EB-prol	LOC5573038	LOC120414164	LOC5573038|AAEL025993	Up	0.517752	0.0724501	6.00628e-05
ISC/EB-prol	LOC5568436	LOC120417806	LOC5568436|AAEL012661	Up	0.516365	0.0274128	2.1622e-05
ISC/EB-prol	LOC5578928	LOC120430493	LOC5578928|AAEL003768	Up	0.515995	0.115794	0.000698541
ISC/EB-prol	LOC5571779	LOC120424190	LOC5571779|AAEL009295	Up	0.515017	0.0781812	1.10996e-06
ISC/EB-prol	LOC5568522	LOC120416998	LOC5568522|AAEL006934	Up	0.511718	0.10518	0.000239563
ISC/EB-prol	LOC5571107	LOC120419588	LOC5571107|AAEL001526	Up	0.506356	0.0892573	0.000151557
ISC/EB-prol	LOC5564011	LOC120418035	LOC5564011|AAEL014272	Up	0.504796	0.0587299	2.56042e-05
ISC/EB-prol	LOC5563659	LOC120415912	LOC5563659|AAEL000004	Up	0.503598	0.094928	0.00058495
ISC/EB-prol	LOC5579155	LOC120426143	LOC5579155|AAEL023676	Up	0.500739	0.0933324	0.000106718
ISC/EB-prol	LOC5569529	LOC120419037	LOC5569529|AAEL007699	Up	0.498508	0.012042	7.08798e-05
ISC/EB-prol	LOC110676515	LOC120431191	LOC110676515|AAEL023511	Up	0.494619	0.0815055	0.00029012
ISC/EB-prol	LOC5564185	LOC120428436	LOC5564185|AAEL014335	Up	0.492799	0.0572567	2.66302e-06
ISC/EB-prol	LOC5575550	LOC120421289	LOC5575550|AAEL002661	Up	0.492163	0.071746	0.000135715
ISC/EB-prol	LOC5573370	LOC120425999	LOC5573370|AAEL010470	Up	0.491107	0.0647017	7.80038e-05
ISC/EB-prol	LOC5573994	LOC120413458	LOC5573994|AAEL010843	Up	0.489933	0.0229734	1.42848e-06
ISC/EB-prol	LOC5573412	LOC120420217	LOC5573412|AAEL002084	Up	0.486254	0.093198	0.000341828
ISC/EB-prol	LOC5577049	LOC120418919	LOC5577049|AAEL020265	Up	0.483956	0.0988079	0.000386872
ISC/EB-prol	LOC5564509	LOC120428532	LOC5564509|AAEL004297	Up	0.482392	0.0693434	0.000137835
ISC/EB-prol	LOC5571387	LOC120413162	LOC5571387|AAEL009026	Up	0.478025	0.0427704	4.69501e-05
ISC/EB-prol	LOC5570244	LOC120425218	LOC5570244|AAEL008188	Up	0.477016	0.0112813	5.47271e-05
ISC/EB-prol	LOC5565624	LOC120418490	LOC5565624|AAEL014292	Up	0.475808	0.0128247	6.42194e-05
ISC/EB-prol	LOC5576572	LOC120416294	LOC5576572|AAEL025570	Up	0.475724	0.056222	3.92899e-05
ISC/EB-prol	LOC5568089	LOC120417293	LOC5568089|AAEL006519	Up	0.475236	0.0842068	0.000113315
ISC/EB-prol	LOC5576444	LOC120430033	LOC5576444|AAEL012539	Up	0.473443	0.10273	0.000590534
ISC/EB-prol	LOC5567647	LOC120415017	LOC5567647|AAEL027611	Up	0.472117	0.0630015	3.61125e-05
ISC/EB-prol	LOC5566357	LOC120422834	LOC5566357|AAEL005339	Up	0.471034	0.0931339	0.000100376
ISC/EB-prol	LOC5580262	LOC120427581	LOC5580262|AAEL018244	Up	0.470343	0.0991904	0.000342164
ISC/EB-prol	LOC5568802	LOC120425906	LOC5568802|AAEL001154	Up	0.466843	0.0862632	0.000239308
ISC/EB-prol	LOC5567237	LOC120429109	LOC5567237|AAEL000874	Up	0.464568	0.0637732	4.03837e-05
ISC/EB-prol	LOC5580311	LOC120413806	LOC5580311|AAEL003014	Up	0.462861	0.0950064	0.000463645
ISC/EB-prol	LOC5579505	LOC120423540	LOC5579505|AAEL015136	Up	0.458436	0.0946931	0.000343737
ISC/EB-prol	LOC5565736	LOC120415359	LOC5565736|AAEL004964	Up	0.45829	0.096671	0.000287175
ISC/EB-prol	LOC5574958	LOC120415108	LOC5574958|AAEL011560	Up	0.45506	0.0884441	0.00011263
ISC/EB-prol	LOC5572040	LOC120415204	LOC5572040|AAEL000226	Up	0.452607	0.120295	0.00106782
ISC/EB-prol	LOC5571878	LOC120427341	LOC5571878|AAEL009367	Up	0.444207	0.0618208	0.000127715
ISC/EB-prol	LOC5571558	LOC120416016	LOC5571558|AAEL009148	Up	0.443056	0.0828521	0.000206341
ISC/EB-prol	LOC5572365	LOC120427769	LOC5572365|AAEL009747	Up	0.442902	0.0126901	6.61733e-05
ISC/EB-prol	LOC5564117	LOC120428930	LOC5564117|AAEL019408	Up	0.439031	0.0322366	0.000187939
ISC/EB-prol	LOC5578243	LOC120416092	LOC5578243|AAEL015006	Up	0.438515	0.0110563	6.01552e-05
ISC/EB-prol	LOC5573998	LOC120413448	LOC5573998|AAEL010834	Up	0.437784	0.104331	0.000519491
ISC/EB-prol	LOC110677715	LOC120412764	LOC110677715|AAEL025238	Up	0.432595	0.106058	0.00131418
ISC/EB-prol	LOC5569219	LOC120431609	LOC5569219|AAEL007484	Up	0.431466	0.100541	0.000284616
ISC/EB-prol	LOC5576894	LOC120423868	LOC5576894|AAEL003046	Up	0.430813	0.036698	2.83818e-06
ISC/EB-prol	LOC5577406	LOC120427175	LOC5577406|AAEL003179	Up	0.428064	0.0679288	0.000241938
ISC/EB-prol	LOC5570913	LOC120422992	LOC5570913|AAEL001484	Up	0.426003	0.0487215	0.000569136
ISC/EB-prol	LOC5568927	LOC120432469	LOC5568927|AAEL007234	Up	0.42485	0.116119	0.00202153
ISC/EB-prol	LOC23687811	LOC120414169	LOC23687811|AAEL017391	Up	0.423184	0.0649339	6.59636e-05
ISC/EB-prol	LOC5570432	LOC120414102	LOC5570432|AAEL008329	Up	0.422191	0.0124926	7.50867e-05
ISC/EB-prol	LOC5573885	LOC120417871	LOC5573885|AAEL010798	Up	0.421706	0.0476091	6.65514e-05
ISC/EB-prol	LOC5573954	LOC120423106	LOC5573954|AAEL002240	Up	0.420599	0.0954398	0.000486583
ISC/EB-prol	LOC5563782	LOC120415147	LOC5563782|AAEL003946	Up	0.416674	0.110074	0.00103307
ISC/EB-prol	LOC5567207	LOC120415371	LOC5567207|AAEL000902	Up	0.413275	0.0823286	0.000372941
ISC/EB-prol	LOC5570924	LOC120418288	LOC5570924|AAEL026751	Up	0.409441	0.0451834	8.1915e-06
ISC/EB-prol	LOC5569143	LOC120429098	LOC5569143|AAEL007403	Up	0.400607	0.0538616	8.05446e-05
ISC/EB-prol	LOC5571930	LOC120415845	LOC5571930|AAEL009389	Up	0.399192	0.0381603	0.000294466
ISC/EB-prol	LOC5574962	LOC120415103	LOC5574962|AAEL011562	Up	0.398189	0.0710736	0.000191971
ISC/EB-prol	LOC5574358	LOC120413451	LOC5574358|AAEL002358	Up	0.396441	0.110424	0.00160126
ISC/EB-prol	LOC5575775	LOC120422488	LOC5575775|AAEL002700	Up	0.396416	0.0945038	0.000539224
ISC/EB-prol	LOC110676045	LOC120424862	LOC110676045|AAEL022286	Up	0.395624	0.0112047	5.36923e-05
ISC/EB-prol	LOC5564012	LOC120418409	LOC5564012|AAEL014275	Up	0.395146	0.113137	0.00184812
ISC/EB-prol	LOC5569005	LOC120427824	LOC5569005|AAEL007282	Up	0.393682	0.0555801	0.000134471
ISC/EB-prol	LOC110675665	LOC120424881	LOC110675665|AAEL028005	Up	0.393279	0.0686448	5.19032e-05
ISC/EB-prol	LOC5567214	LOC120426729	LOC5567214|AAEL028205	Up	0.388939	0.0409974	1.33002e-05
ISC/EB-prol	LOC5571564	LOC120425318	LOC5571564|AAEL009151	Up	0.38724	0.0116095	9.36003e-08
ISC/EB-prol	LOC5564186	LOC120431391	LOC5564186|AAEL026297	Up	0.383981	0.112589	0.00254252
ISC/EB-prol	LOC5574704	LOC120428335	LOC5574704|AAEL011340	Up	0.383584	0.0850314	0.00289761
ISC/EB-prol	LOC5566751	LOC120413336	LOC5566751|AAEL015238	Up	0.383381	0.0530006	0.000891607
ISC/EB-prol	LOC5565765	LOC120422945	LOC5565765|AAEL004973	Up	0.380334	0.0903242	0.000517282
ISC/EB-prol	LOC5563713	LOC120423969	LOC5563713|AAEL003916	Up	0.376654	0.112483	0.0027075
ISC/EB-prol	LOC5572308	LOC128092259	LOC5572308|AAEL009700	Up	0.374251	0.0895691	0.00101218
ISC/EB-prol	LOC5578495	LOC120413275	LOC5578495|AAEL002335	Up	0.372333	0.0740799	0.000566285
ISC/EB-prol	LOC5569899	LOC120431634	LOC5569899|AAEL007990	Up	0.370485	0.0654628	0.000176397
ISC/EB-prol	LOC5580062	LOC120416301	LOC5580062|AAEL002135	Up	0.369337	0.0664315	4.21563e-05
ISC/EB-prol	LOC5577996	LOC120432401	LOC5577996|AAEL003396	Up	0.368664	0.0107776	8.62278e-07
ISC/EB-prol	LOC5576540	LOC120421046	LOC5576540|AAEL012595	Up	0.366151	0.091515	0.000686652
ISC/EB-prol	LOC5578459	LOC120413998	LOC5578459|AAEL000486	Up	0.365433	0.0314703	2.04091e-05
ISC/EB-prol	LOC5564956	LOC120412427	LOC5564956|AAEL024396	Up	0.36473	0.0902103	0.000886957
ISC/EB-prol	LOC5570433	LOC120414100	LOC5570433|AAEL019748	Up	0.3644	0.0541715	0.000169834
ISC/EB-prol	LOC5578307	LOC120417695	LOC5578307|AAEL013628	Up	0.364196	0.076136	0.000302165
ISC/EB-prol	LOC5574270	LOC120421622	LOC5574270|AAEL011038	Up	0.360593	0.0703347	0.000423641
ISC/EB-prol	LOC5565760	LOC120422502	LOC5565760|AAEL004981	Up	0.36036	0.0621219	0.000242789
ISC/EB-prol	LOC110678983	LOC120414391	LOC110678983|AAEL025807	Up	0.356572	0.0850326	0.000819937
ISC/EB-prol	LOC5576841	LOC120426686	LOC5576841|AAEL012827	Up	0.356457	0.0358165	3.8463e-05
ISC/EB-prol	LOC5567126	LOC120422319	LOC5567126|AAEL005879	Up	0.356266	0.055383	0.000132245
ISC/EB-prol	LOC5578090	LOC120416817	LOC5578090|AAEL003415	Up	0.354715	0.0399783	1.98325e-05
ISC/EB-prol	LOC5567073	LOC120426741	LOC5567073|AAEL005796	Up	0.351663	0.0874665	0.000682689
ISC/EB-prol	LOC5573381	LOC120422541	LOC5573381|AAEL028161	Up	0.346346	0.111782	0.00326607
ISC/EB-prol	LOC5563904	LOC128093113	LOC5563904|AAEL003993	Up	0.343832	0.0597573	0.000191302
ISC/EB-prol	LOC5576834	LOC120432163	LOC5576834|AAEL022462	Up	0.342668	0.0988922	0.00238328
ISC/EB-prol	LOC5578696	LOC120427716	LOC5578696|AAEL025569	Up	0.338846	0.0899039	0.00108365
ISC/EB-prol	LOC5574055	LOC120431084	LOC5574055|AAEL010895	Up	0.336958	0.0872753	0.000979603
ISC/EB-prol	LOC5577985	LOC120425163	LOC5577985|AAEL013461	Up	0.336184	0.0718648	0.000572465
ISC/EB-prol	LOC5568213	LOC120419408	LOC5568213|AAEL019739	Up	0.330797	0.091275	0.00164626
ISC/EB-prol	LOC5572284	LOC120426782	LOC5572284|AAEL001759	Up	0.330717	0.0115718	9.01223e-05
ISC/EB-prol	LOC5573266	LOC120424718	LOC5573266|AAEL019802	Up	0.329012	0.0679153	0.000513383
ISC/EB-prol	LOC5564809	LOC120426701	LOC5564809|AAEL014630	Up	0.328982	0.103986	0.00255597
ISC/EB-prol	LOC5565453	LOC120422211	LOC5565453|AAEL000667	Up	0.321658	0.144371	0.0319936
ISC/EB-prol	LOC5573374	LOC120425993	LOC5573374|AAEL010464	Up	0.321577	0.0426536	3.50989e-05
ISC/EB-prol	LOC5580031	LOC120430599	LOC5580031|AAEL009647	Up	0.319311	0.105313	0.00395432
ISC/EB-prol	LOC5571140	LOC120414656	LOC5571140|AAEL008854	Up	0.319095	0.0714399	0.00195596
ISC/EB-prol	LOC5568502	LOC120413036	LOC5568502|AAEL019567	Up	0.318708	0.0642187	0.000404653
ISC/EB-prol	LOC5572195	LOC120413403	LOC5572195|AAEL014715	Up	0.316257	0.033679	6.97496e-05
ISC/EB-prol	LOC5577203	LOC120421455	LOC5577203|AAEL013102	Up	0.315803	0.0806379	0.00114901
ISC/EB-prol	LOC5580053	LOC120432238	LOC5580053|AAEL002175	Up	0.315496	0.0483821	7.65534e-05
ISC/EB-prol	LOC5578839	LOC120419647	LOC5578839|AAEL019482	Up	0.31306	0.0417019	9.05241e-05
ISC/EB-prol	LOC5574338	LOC120430340	LOC5574338|AAEL002334	Up	0.311966	0.0288138	4.16934e-05
ISC/EB-prol	LOC5569067	LOC120413843	LOC5569067|AAEL001218	Up	0.311428	0.0537933	8.90232e-05
ISC/EB-prol	LOC5568658	LOC120423439	LOC5568658|AAEL007001	Up	0.31126	0.0656692	0.000175367
ISC/EB-prol	LOC5575320	LOC120415225	LOC5575320|AAEL019699	Up	0.311039	0.11398	0.00619876
ISC/EB-prol	LOC5572161	LOC120429624	LOC5572161|AAEL009574	Up	0.310058	0.0969043	0.00279944
ISC/EB-prol	LOC110675611	LOC120428813	LOC110675611|AAEL026833	Up	0.30971	0.0322562	4.64354e-06
ISC/EB-prol	LOC5568114	LOC120422882	LOC5568114|AAEL006551	Up	0.309096	0.0928776	0.00255276
ISC/EB-prol	LOC5573352	LOC120425534	LOC5573352|AAEL018710	Up	0.30745	0.113669	0.00779844
ISC/EB-prol	LOC5573948	LOC120423108	LOC5573948|AAEL002183	Up	0.305671	0.0512483	0.000322857
ISC/EB-prol	LOC5580214	LOC120428645	LOC5580214|AAEL011918	Up	0.305288	0.0582155	0.000608672
ISC/EB-prol	LOC5579028	LOC120414333	LOC5579028|AAEL013963	Up	0.304833	0.0777136	0.0014133
ISC/EB-prol	LOC5574747	LOC120432327	LOC5574747|AAEL019990	Up	0.302376	0.0646008	0.000388983
ISC/EB-prol	LOC5576054	LOC120431290	LOC5576054|AAEL013952	Up	0.301879	0.0450902	8.3501e-05
ISC/EB-prol	LOC5567335	LOC120427094	LOC5567335|AAEL006002	Up	0.300217	0.0992404	0.0029994
ISC/EB-prol	LOC5571449	LOC120427609	LOC5571449|AAEL009085	Up	0.299953	0.0687086	0.0005651
ISC/EB-prol	LOC5567848	LOC120422997	LOC5567848|AAEL000987	Up	0.299394	0.0111854	0.000109071
ISC/EB-prol	LOC5572534	LOC120416051	LOC5572534|AAEL009859	Up	0.299109	0.0206138	1.84934e-05
ISC/EB-prol	LOC5578734	LOC120416977	LOC5578734|AAEL003661	Up	0.29655	0.0536163	0.000169168
ISC/EB-prol	LOC5578927	LOC120430499	LOC5578927|AAEL003750	Up	0.296103	0.0205216	2.50335e-05
ISC/EB-prol	LOC5573763	LOC120428572	LOC5573763|AAEL000269	Up	0.294977	0.0184636	3.57174e-06
ISC/EB-prol	LOC5569740	LOC120427505	LOC5569740|AAEL022979	Up	0.293934	0.100658	0.0039992
ISC/EB-prol	LOC5567808	LOC120422999	LOC5567808|AAEL000985	Up	0.293766	0.108663	0.00919816
ISC/EB-prol	LOC5574971	LOC120416915	LOC5574971|AAEL019422	Up	0.291113	0.065355	0.000517943
ISC/EB-prol	LOC5578986	LOC120424034	LOC5578986|AAEL003785	Up	0.290661	0.115283	0.00979804
ISC/EB-prol	LOC5570621	LOC120422562	LOC5570621|AAEL008422	Up	0.290316	0.0801151	0.00137136
ISC/EB-prol	LOC5577284	LOC120415178	LOC5577284|AAEL013138	Up	0.28816	0.0794156	0.00223944
ISC/EB-prol	LOC5570914	LOC120422988	LOC5570914|AAEL001479	Up	0.287531	0.0831808	0.0011843
ISC/EB-prol	LOC5566185	LOC120427531	LOC5566185|AAEL007936	Up	0.285497	0.0987424	0.004999
ISC/EB-prol	LOC5573843	LOC120428516	LOC5573843|AAEL024838	Up	0.284438	0.111294	0.0133973
ISC/EB-prol	LOC5578806	LOC120414515	LOC5578806|AAEL013845	Up	0.28407	0.116144	0.0203959
ISC/EB-prol	LOC5567869	LOC120423204	LOC5567869|AAEL006314	Up	0.283288	0.129397	0.0307938
ISC/EB-prol	LOC5579855	LOC120414983	LOC5579855|AAEL018354	Up	0.283094	0.0948614	0.00259948
ISC/EB-prol	LOC5566236	LOC120430366	LOC5566236|AAEL005269	Up	0.282789	0.0367928	5.16036e-05
ISC/EB-prol	LOC5568529	LOC120431458	LOC5568529|AAEL006945	Up	0.282599	0.104674	0.00659868
ISC/EB-prol	LOC5578596	LOC120418909	LOC5578596|AAEL013778	Up	0.28095	0.0463956	0.000167718
ISC/EB-prol	LOC5577429	LOC120424572	LOC5577429|AAEL013176	Up	0.280822	0.0940995	0.00339932
ISC/EB-prol	LOC5568291	LOC120430317	LOC5568291|AAEL006748	Up	0.279548	0.117352	0.0205959
ISC/EB-prol	LOC5578918	LOC120431826	LOC5578918|AAEL003758	Up	0.278903	0.0655171	0.000812163
ISC/EB-prol	LOC5573872	LOC120418758	LOC5573872|AAEL010787	Up	0.278508	0.0182072	0.000280559
ISC/EB-prol	LOC5578125	LOC120421975	LOC5578125|AAEL003416	Up	0.278449	0.0798555	0.00179221
ISC/EB-prol	LOC5579142	LOC120418256	LOC5579142|AAEL014016	Up	0.277989	0.12441	0.0231954
ISC/EB-prol	LOC5579659	LOC120425363	LOC5579659|AAEL003955	Up	0.276343	0.0899292	0.00259948
ISC/EB-prol	LOC5573842	LOC120428521	LOC5573842|AAEL021227	Up	0.271729	0.0696995	0.00364622
ISC/EB-prol	LOC5575721	LOC120412962	LOC5575721|AAEL012029	Up	0.270611	0.0825427	0.00212777
ISC/EB-prol	LOC5576286	LOC120428288	LOC5576286|AAEL012440	Up	0.26695	0.117419	0.0219956
ISC/EB-prol	LOC23687627	LOC120418343	LOC23687627|AAEL021288	Up	0.264288	0.0941903	0.004999
ISC/EB-prol	LOC5574782	LOC120415124	LOC5574782|AAEL011425	Up	0.259272	0.0803333	0.00243554
ISC/EB-prol	LOC5564183	LOC120414403	LOC5564183|AAEL004121	Up	0.259038	0.0760921	0.00469793
ISC/EB-prol	LOC5570214	LOC120414362	LOC5570214|AAEL008154	Up	0.258857	0.0484982	0.000165462
ISC/EB-prol	LOC5573495	LOC120418406	LOC5573495|AAEL010543	Up	0.258845	0.105105	0.0195961
ISC/EB-prol	LOC5565883	LOC120412659	LOC5565883|AAEL019474	Up	0.25589	0.0750282	0.00238121
ISC/EB-prol	LOC5571955	LOC120420360	LOC5571955|AAEL026633	Up	0.255568	0.064566	0.000960669
ISC/EB-prol	LOC110674836	LOC120430936	LOC110674836|AAEL020033	Up	0.254995	0.0649527	0.00148041
ISC/EB-prol	LOC5578893	LOC120427434	LOC5578893|AAEL013898	Up	0.254311	0.112382	0.0211958
ISC/EB-prol	LOC5569547	LOC120417564	LOC5569547|AAEL007718	Up	0.249207	0.0341717	0.000148251
ISC/EB-prol	LOC5578857	LOC120427130	LOC5578857|AAEL027402	Up	0.247986	0.0351215	2.54336e-05
ISC/EB-prol	LOC5565836	LOC120420491	LOC5565836|AAEL005017	Up	0.247853	0.0436127	0.00024803
ISC/EB-prol	LOC5574780	LOC120425513	LOC5574780|AAEL011412	Up	0.246714	0.0761174	0.00310973
ISC/EB-prol	LOC5572285	LOC120426785	LOC5572285|AAEL001779	Up	0.24544	0.0356337	5.0688e-05
ISC/EB-prol	LOC5579484	LOC120424976	LOC5579484|AAEL015298	Up	0.245154	0.0636298	0.000867874
ISC/EB-prol	LOC5570694	LOC120415716	LOC5570694|AAEL008497	Up	0.244748	0.106002	0.0223955
ISC/EB-prol	LOC5569498	LOC120428094	LOC5569498|AAEL007693	Up	0.244437	0.118354	0.0405919
ISC/EB-prol	LOC5576102	LOC120417437	LOC5576102|AAEL002779	Up	0.243993	0.0777194	0.00358431
ISC/EB-prol	LOC5570462	LOC120422914	LOC5570462|AAEL022661	Up	0.243456	0.0916649	0.0107978
ISC/EB-prol	LOC5568178	LOC120418728	LOC5568178|AAEL019914	Up	0.243311	0.0990145	0.0133973
ISC/EB-prol	LOC5574166	LOC120418230	LOC5574166|AAEL019623	Up	0.241505	0.0882894	0.00719856
ISC/EB-prol	LOC110677031	LOC120432433	LOC110677031|AAEL027249	Up	0.236634	0.097823	0.0179964
ISC/EB-prol	LOC5579109	LOC120432671	LOC5579109|AAEL003829	Up	0.234927	0.0795777	0.00279944
ISC/EB-prol	LOC5571906	LOC120415870	LOC5571906|AAEL009398	Up	0.233735	0.0827042	0.00439912
ISC/EB-prol	LOC5571409	LOC120417619	LOC5571409|AAEL009051	Up	0.232535	0.0745935	0.0029994
ISC/EB-prol	LOC110679353	LOC120421446	LOC110679353|AAEL025697	Up	0.232031	0.0382491	0.000309369
ISC/EB-prol	LOC5572673	LOC120418640	LOC5572673|AAEL009948	Up	0.231677	0.116445	0.0429914
ISC/EB-prol	LOC5569632	LOC120414826	LOC5569632|AAEL007777	Up	0.229401	0.0524563	0.000754522
ISC/EB-prol	LOC5573269	LOC120424722	LOC5573269|AAEL019544	Up	0.22821	0.0982678	0.0259948
ISC/EB-prol	LOC5572466	LOC120416783	LOC5572466|AAEL001832	Up	0.22518	0.0859743	0.0103979
ISC/EB-prol	LOC5569427	LOC120418477	LOC5569427|AAEL007624	Up	0.224292	0.0499816	0.000610252
ISC/EB-prol	LOC5577734	LOC120419662	LOC5577734|AAEL019516	Up	0.218344	0.0818281	0.00839832
ISC/EB-prol	LOC5563706	LOC120423968	LOC5563706|AAEL003921	Up	0.217206	0.0983064	0.0307938
ISC/EB-prol	LOC5566394	LOC120419185	LOC5566394|AAEL005356	Up	0.216039	0.0843866	0.00939812
ISC/EB-prol	LOC5576223	LOC120416757	LOC5576223|AAEL002825	Up	0.215594	0.0548193	0.00099868
ISC/EB-prol	LOC5566373	LOC120426756	LOC5566373|AAEL005353	Up	0.213806	0.0776651	0.0039992
ISC/EB-prol	LOC5572093	LOC120432669	LOC5572093|AAEL009507	Up	0.21254	0.0873237	0.014797
ISC/EB-prol	LOC23687867	LOC120417983	LOC23687867|AAEL017447	Up	0.211296	0.0412857	0.000349143
ISC/EB-prol	LOC5567476	LOC120429552	LOC5567476|AAEL000948	Up	0.210598	0.0806587	0.0069986
ISC/EB-prol	LOC5578522	LOC128092894	LOC5578522|AAEL013731	Up	0.206679	0.0901992	0.0227954
ISC/EB-prol	LOC5576078	LOC120413195	LOC5576078|AAEL012310	Up	0.205822	0.0505944	0.000967759
ISC/EB-prol	LOC5578900	LOC120413202	LOC5578900|AAEL013904	Up	0.202545	0.0464311	0.000332758
ISC/EB-prol	LOC5580194	LOC120427399	LOC5580194|AAEL002539	Up	0.20156	0.0431475	0.000484636
ISC/EB-prol	LOC5570534	LOC120417422	LOC5570534|AAEL001421	Up	0.199862	0.0501076	0.000773695
ISC/EB-prol	LOC5565337	LOC120415405	LOC5565337|AAEL014831	Up	0.19906	0.0819768	0.0141972
ISC/EB-prol	LOC5575037	LOC120415404	LOC5575037|AAEL011587	Up	0.195504	0.0116879	0.000168399
ISC/EB-prol	LOC5568526	LOC120431459	LOC5568526|AAEL006946	Up	0.18991	0.0367715	0.000174017
ISC/EB-prol	LOC5565589	LOC120431859	LOC5565589|AAEL004865	Up	0.188989	0.021522	3.06056e-05
ISC/EB-prol	LOC5568764	LOC120426100	LOC5568764|AAEL010704	Up	0.187947	0.0460438	0.000703383
ISC/EB-prol	LOC5565217	LOC120414241	LOC5565217|AAEL004669	Up	0.187819	0.0438186	0.00169163
ISC/EB-prol	LOC5574953	LOC120415119	LOC5574953|AAEL011551	Up	0.185776	0.0863784	0.0407918
ISC/EB-prol	LOC5569144	LOC120429100	LOC5569144|AAEL007392	Up	0.185648	0.0420689	0.000468694
ISC/EB-prol	LOC5578207	LOC120422861	LOC5578207|AAEL003462	Up	0.183538	0.0409893	0.000321134
ISC/EB-prol	LOC5575865	LOC120424147	LOC5575865|AAEL012135	Up	0.18149	0.08764	0.0353929
ISC/EB-prol	LOC5573302	LOC120426139	LOC5573302|AAEL022867	Up	0.181245	0.0768925	0.0161968
ISC/EB-prol	LOC5574665	LOC120413907	LOC5574665|AAEL011309	Up	0.180562	0.0388021	0.000685365
ISC/EB-prol	LOC5571783	LOC120416088	LOC5571783|AAEL009320	Up	0.179854	0.037449	0.000229354
ISC/EB-prol	LOC5579472	LOC120432245	LOC5579472|AAEL007650	Up	0.179549	0.0376483	6.098e-05
ISC/EB-prol	LOC5577178	LOC120428239	LOC5577178|AAEL013047	Up	0.179359	0.0438183	0.000725358
ISC/EB-prol	LOC5572209	LOC120413424	LOC5572209|AAEL009601	Up	0.179064	0.0858369	0.0385923
ISC/EB-prol	LOC5565366	LOC120417357	LOC5565366|AAEL004739	Up	0.174978	0.0754781	0.0183963
ISC/EB-prol	LOC5574612	LOC120414286	LOC5574612|AAEL011255	Up	0.173611	0.0379061	0.000555594
ISC/EB-prol	LOC5568103	LOC120427021	LOC5568103|AAEL006538	Up	0.173199	0.0673529	0.0143971
ISC/EB-prol	LOC5573372	LOC120422557	LOC5573372|AAEL010467	Up	0.171991	0.0415179	0.000490371
ISC/EB-prol	LOC5566608	LOC120420438	LOC5566608|AAEL000791	Up	0.171196	0.0812664	0.0385923
ISC/EB-prol	LOC5567222	LOC120428789	LOC5567222|AAEL019724	Up	0.168059	0.0572055	0.00459908
ISC/EB-prol	LOC5572725	LOC120430495	LOC5572725|AAEL009994	Up	0.167461	0.0143036	0.000406112
ISC/EB-prol	LOC5573574	LOC120421266	LOC5573574|AAEL002118	Up	0.163273	0.0464096	0.00193359
ISC/EB-prol	LOC5572735	LOC120426738	LOC5572735|AAEL010012	Up	0.162002	0.037889	0.000464876
ISC/EB-prol	LOC5573750	LOC120415269	LOC5573750|AAEL000275	Up	0.160518	0.0627014	0.00779844
ISC/EB-prol	LOC5573942	LOC120426896	LOC5573942|AAEL019793	Up	0.15393	0.0697465	0.030194
ISC/EB-prol	LOC5578796	LOC120421723	LOC5578796|AAEL003675	Up	0.151404	0.0310977	0.00062804
ISC/EB-prol	LOC5571006	LOC120414905	LOC5571006|AAEL008738	Up	0.14497	0.0401921	0.00104495
ISC/EB-prol	LOC5576896	LOC120423866	LOC5576896|AAEL003039	Up	0.144647	0.0301167	0.000262185
ISC/EB-prol	LOC5570007	LOC120419573	LOC5570007|AAEL000175	Up	0.144462	0.0374858	0.00115299
ISC/EB-prol	LOC5574862	LOC120420361	LOC5574862|AAEL011468	Up	0.143392	0.0383612	0.00207206
ISC/EB-prol	LOC5570509	LOC120425582	LOC5570509|AAEL001432	Up	0.143362	0.039952	0.000792176
ISC/EB-prol	LOC5574592	LOC120423845	LOC5574592|AAEL002411	Up	0.142124	0.0353347	0.000507312
ISC/EB-prol	LOC5566684	LOC120414339	LOC5566684|AAEL005567	Up	0.140298	0.0374013	0.000759962
ISC/EB-prol	LOC5577537	LOC120415566	LOC5577537|AAEL013252	Up	0.131467	0.0553319	0.0187962
ISC/EB-prol	LOC5563590	LOC120417150	LOC5563590|AAEL000032	Up	0.129989	0.0127932	0.000498427
ISC/EB-prol	LOC110678484	LOC120421481	LOC110678484|AAEL025246	Up	0.126422	0.0628579	0.0457908
ISC/EB-prol	LOC5568521	LOC120416989	LOC5568521|AAEL006928	Up	0.126303	0.0529489	0.0187962
ISC/EB-prol	LOC5575995	LOC120423279	LOC5575995|AAEL002761	Up	0.125302	0.0331034	0.000797446
ISC/EB-prol	LOC110679583	LOC120421856	LOC110679583|AAEL023591	Up	0.121759	0.0414046	0.00459908
ISC/EB-prol	LOC5573712	LOC120424982	LOC5573712|AAEL010697	Up	0.117761	0.057979	0.044791
ISC/EB-prol	LOC5575273	LOC120424427	LOC5575273|AAEL011742	Up	0.11755	0.0303318	0.00079752
ISC/EB-prol	LOC5577777	LOC120429256	LOC5577777|AAEL003285	Up	0.116923	0.052684	0.0289942
ISC/EB-prol	LOC5568120	LOC120425995	LOC5568120|AAEL018119	Up	0.116847	0.0578055	0.0433913
ISC/EB-prol	LOC5576744	LOC120417412	LOC5576744|AAEL024536	Up	0.115967	0.0107878	3.3622e-05
ISC/EB-prol	LOC5566977	LOC120414545	LOC5566977|AAEL005739	Up	0.114837	0.0403262	0.00439912
ISC/EB-prol	LOC5570930	LOC120414685	LOC5570930|AAEL008672	Up	0.113777	0.0490641	0.0211958
ISC/EB-prol	LOC5567839	LOC120427249	LOC5567839|AAEL001005	Up	0.109499	0.0341568	0.00339001
ISC/EB-prol	LOC5568784	LOC120419108	LOC5568784|AAEL007135	Up	0.109237	0.0358912	0.00239952
ISC/EB-prol	LOC5568090	LOC120417310	LOC5568090|AAEL006511	Up	0.107153	0.0108369	0.000364363
ISC/EB-prol	LOC5564556	LOC120430857	LOC5564556|AAEL004325	Up	0.105648	0.0127271	0.000539842
ISC/EB-prol	LOC5565303	LOC120423470	LOC5565303|AAEL004710	Up	0.103537	0.0499518	0.0369926
ISC/EB-prol	LOC5578101	LOC120416824	LOC5578101|AAEL003418	Up	0.0984167	0.049264	0.0471906
ISC/EB-prol	LOC5570505	LOC120425590	LOC5570505|AAEL001411	Up	0.0947874	0.0275505	0.00182374
ISC/EB-prol	LOC5577566	LOC120421114	LOC5577566|AAEL013272	Up	0.0941596	0.0121833	0.000833969
ISC/EB-prol	LOC5578123	LOC120416844	LOC5578123|AAEL003427	Up	0.0887619	0.0101499	1.58769e-06
ISC/EB-prol	LOC5571304	LOC120422058	LOC5571304|AAEL008953	Up	0.0798124	0.0311009	0.00859828
ISC/EB-prol	LOC5565979	LOC120423961	LOC5565979|AAEL005097	Up	0.0767049	0.0120022	0.000853179
ISC/EB-prol	LOC110678734	LOC120419254	LOC110678734|AAEL019403	Up	0.0666415	0.0131315	0.00114717
ISC/EB-prol	LOC5565544	LOC120416489	LOC5565544|AAEL004855	Up	0.0447683	0.0123932	0.0032084
ISC/EB-prol	LOC5575105	LOC120427008	LOC5575105|AAEL011656	Down	-0.0280719	0.0119218	0.0235953
ISC/EB-prol	LOC5576244	LOC120428195	LOC5576244|AAEL002851	Down	-0.0438132	0.0222141	0.0465907
ISC/EB-prol	LOC5567070	LOC120416902	LOC5567070|AAEL005817	Down	-0.0438165	0.0109307	0.00230706
ISC/EB-prol	LOC5574167	LOC120418235	LOC5574167|AAEL010977	Down	-0.0439182	0.0183962	0.0131974
ISC/EB-prol	LOC5569531	LOC120417554	LOC5569531|AAEL007715	Down	-0.0592265	0.0113511	0.00139299
ISC/EB-prol	LOC5575715	LOC120412942	LOC5575715|AAEL012026	Down	-0.0608529	0.0232049	0.0111978
ISC/EB-prol	LOC5569582	LOC120423615	LOC5569582|AAEL007771	Down	-0.0616244	0.0115117	0.000929809
ISC/EB-prol	LOC5566228	LOC120421054	LOC5566228|AAEL005266	Down	-0.0667136	0.0108444	0.00100434
ISC/EB-prol	LOC5572968	LOC120412941	LOC5572968|AAEL010168	Down	-0.072891	0.012856	0.000825477
ISC/EB-prol	LOC5576758	LOC120422611	LOC5576758|AAEL025553	Down	-0.0757945	0.0115467	0.000872164
ISC/EB-prol	LOC5580329	LOC120419194	LOC5580329|AAEL013069	Down	-0.0808542	0.013518	0.0012743
ISC/EB-prol	LOC5566959	LOC120422082	LOC5566959|AAEL005722	Down	-0.081155	0.0112363	0.000923988
ISC/EB-prol	LOC5572090	LOC120412342	LOC5572090|AAEL009496	Down	-0.0836715	0.011806	0.000728899
ISC/EB-prol	LOC5566843	LOC120413809	LOC5566843|AAEL000823	Down	-0.091983	0.0109847	0.000732222
ISC/EB-prol	LOC5568503	LOC120413041	LOC5568503|AAEL006922	Down	-0.0933397	0.0329425	0.00559888
ISC/EB-prol	LOC5573974	LOC120426083	LOC5573974|AAEL010821	Down	-0.0974306	0.0116995	0.00036145
ISC/EB-prol	LOC5567495	LOC120421831	LOC5567495|AAEL000934	Down	-0.107078	0.0394589	0.00539892
ISC/EB-prol	LOC5574816	LOC120426914	LOC5574816|AAEL002464	Down	-0.114546	0.0429511	0.00519896
ISC/EB-prol	LOC5574404	LOC120425614	LOC5574404|AAEL011116	Down	-0.116802	0.0244824	0.000372771
ISC/EB-prol	LOC5568690	LOC120426851	LOC5568690|AAEL007065	Down	-0.12067	0.0326778	0.000992094
ISC/EB-prol	LOC5570139	LOC120416159	LOC5570139|AAEL008103	Down	-0.123298	0.0108767	1.5883e-05
ISC/EB-prol	LOC5571466	LOC120414837	LOC5571466|AAEL009101	Down	-0.123447	0.0274676	0.000738928
ISC/EB-prol	LOC5579227	LOC120423984	LOC5579227|AAEL014064	Down	-0.129296	0.0271327	0.000611558
ISC/EB-prol	LOC5572994	LOC120425035	LOC5572994|AAEL001937	Down	-0.133032	0.060479	0.0317936
ISC/EB-prol	LOC5573413	LOC120420232	LOC5573413|AAEL002047	Down	-0.136194	0.011054	0.000383828
ISC/EB-prol	LOC5570396	LOC120422347	LOC5570396|AAEL008291	Down	-0.136644	0.0534304	0.0107978
ISC/EB-prol	LOC5574515	LOC120426327	LOC5574515|AAEL019717	Down	-0.137994	0.0174722	1.67461e-05
ISC/EB-prol	LOC5571226	LOC120412765	LOC5571226|AAEL008921	Down	-0.138045	0.0216432	0.000112163
ISC/EB-prol	LOC5577034	LOC120419418	LOC5577034|AAEL012944	Down	-0.144379	0.0113813	0.000278719
ISC/EB-prol	LOC5579901	LOC120429903	LOC5579901|AAEL001052	Down	-0.145117	0.039734	0.0015711
ISC/EB-prol	LOC5571113	LOC120425571	LOC5571113|AAEL001509	Down	-0.147771	0.0672537	0.0317936
ISC/EB-prol	LOC5571397	LOC120430572	LOC5571397|AAEL009029	Down	-0.150284	0.0769177	0.0483903
ISC/EB-prol	LOC23687936	LOC120426907	LOC23687936|AAEL017516	Down	-0.150897	0.0113866	0.000369861
ISC/EB-prol	LOC5567259	LOC120413932	LOC5567259|AAEL005931	Down	-0.156045	0.0579606	0.00939812
ISC/EB-prol	LOC110674164	LOC120421005	LOC110674164|AAEL011982	Down	-0.156482	0.073663	0.0287942
ISC/EB-prol	LOC110674166	LOC120424610	LOC110674166|AAEL020485	Down	-0.15719	0.0537003	0.00339932
ISC/EB-prol	LOC5564047	LOC120425030	LOC5564047|AAEL004071	Down	-0.157573	0.0397727	0.000852493
ISC/EB-prol	LOC5566520	LOC120416323	LOC5566520|AAEL005457	Down	-0.158151	0.0570435	0.00559888
ISC/EB-prol	LOC5566237	LOC120420570	LOC5566237|AAEL005276	Down	-0.160644	0.0621128	0.00879824
ISC/EB-prol	LOC5568714	LOC120415155	LOC5568714|AAEL007042	Down	-0.161204	0.0356395	0.000425428
ISC/EB-prol	LOC5567684	LOC120416972	LOC5567684|AAEL006251	Down	-0.16218	0.0655329	0.0129974
ISC/EB-prol	LOC5575986	LOC120425504	LOC5575986|AAEL002764	Down	-0.16246	0.0529739	0.00339932
ISC/EB-prol	LOC5574069	LOC120423290	LOC5574069|nan	Down	-0.164794	0.0546025	0.00438288
ISC/EB-prol	LOC5570994	LOC120414909	LOC5570994|AAEL008740	Down	-0.167554	0.065262	0.0107978
ISC/EB-prol	LOC5578426	LOC120415459	LOC5578426|AAEL013700	Down	-0.170516	0.0732242	0.0221956
ISC/EB-prol	LOC5574674	LOC120415393	LOC5574674|AAEL011320	Down	-0.171992	0.054037	0.00239952
ISC/EB-prol	LOC5580259	LOC120428359	LOC5580259|AAEL012585	Down	-0.171994	0.0115899	0.000298173
ISC/EB-prol	LOC5575377	LOC120423192	LOC5575377|AAEL011778	Down	-0.172164	0.0629954	0.00479904
ISC/EB-prol	LOC5573606	LOC120420976	LOC5573606|AAEL002125	Down	-0.17226	0.0735943	0.0195961
ISC/EB-prol	LOC5566678	LOC120424005	LOC5566678|AAEL005544	Down	-0.172596	0.069471	0.0129974
ISC/EB-prol	LOC5575405	LOC120421242	LOC5575405|AAEL011810	Down	-0.172699	0.0691412	0.0137972
ISC/EB-prol	LOC5571047	LOC120419525	LOC5571047|AAEL008768	Down	-0.173769	0.0336723	0.000153319
ISC/EB-prol	LOC5572666	LOC120413633	LOC5572666|AAEL001845	Down	-0.175141	0.07692	0.0227954
ISC/EB-prol	LOC5574844	LOC120418866	LOC5574844|AAEL011447	Down	-0.178348	0.0109829	0.000175577
ISC/EB-prol	LOC5580278	LOC120414322	LOC5580278|AAEL003011	Down	-0.179491	0.0554359	0.00264172
ISC/EB-prol	LOC5577026	LOC120430592	LOC5577026|AAEL012950	Down	-0.179782	0.0689475	0.0119976
ISC/EB-prol	LOC5566772	LOC120424308	LOC5566772|AAEL005629	Down	-0.181526	0.0101962	9.91872e-06
ISC/EB-prol	LOC5577289	LOC120427031	LOC5577289|AAEL013139	Down	-0.182724	0.0263319	6.18025e-05
ISC/EB-prol	LOC110679616	LOC120424208	LOC110679616|AAEL027646	Down	-0.18467	0.0700057	0.00719856
ISC/EB-prol	LOC5569522	LOC120419076	LOC5569522|AAEL007705	Down	-0.184828	0.0647392	0.00439912
ISC/EB-prol	LOC5577899	LOC120422000	LOC5577899|AAEL019883	Down	-0.187945	0.0728904	0.0153969
ISC/EB-prol	LOC5568127	LOC120427000	LOC5568127|AAEL006550	Down	-0.188856	0.0829086	0.0233953
ISC/EB-prol	LOC5563646	LOC120415928	LOC5563646|AAEL021083	Down	-0.189596	0.0105384	0.000128537
ISC/EB-prol	LOC5565550	LOC120416490	LOC5565550|AAEL004854	Down	-0.189983	0.0584044	0.00212189
ISC/EB-prol	LOC5578443	LOC120413990	LOC5578443|AAEL000485	Down	-0.190027	0.0793783	0.0171966
ISC/EB-prol	LOC5578147	LOC120425015	LOC5578147|AAEL013528	Down	-0.191711	0.0778746	0.015197
ISC/EB-prol	LOC5574100	LOC120431873	LOC5574100|AAEL002271	Down	-0.193819	0.100946	0.0495901
ISC/EB-prol	LOC5570245	LOC120418357	LOC5570245|AAEL023182	Down	-0.194295	0.0553203	0.00137396
ISC/EB-prol	LOC5568465	LOC120416887	LOC5568465|AAEL006860	Down	-0.194299	0.0126096	0.000206286
ISC/EB-prol	LOC5578702	LOC120413322	LOC5578702|AAEL027002	Down	-0.194729	0.0762537	0.00859828
ISC/EB-prol	LOC5573821	LOC120423118	LOC5573821|AAEL010743	Down	-0.195885	0.0653465	0.00439912
ISC/EB-prol	LOC5572383	LOC120427227	LOC5572383|AAEL009772	Down	-0.196518	0.0425853	0.000490428
ISC/EB-prol	LOC5571900	LOC120414326	LOC5571900|AAEL009377	Down	-0.199379	0.0494225	0.000453536
ISC/EB-prol	LOC5576745	LOC120417387	LOC5576745|AAEL012731	Down	-0.200261	0.0535176	0.00098963
ISC/EB-prol	LOC5565541	LOC120430782	LOC5565541|AAEL004829	Down	-0.20116	0.0330435	8.96148e-05
ISC/EB-prol	LOC5567828	LOC120427677	LOC5567828|AAEL021176	Down	-0.201441	0.0985035	0.0487902
ISC/EB-prol	LOC5577244	LOC120426483	LOC5577244|AAEL003142	Down	-0.206177	0.0928773	0.0285943
ISC/EB-prol	LOC110678287	LOC120413938	LOC110678287|AAEL027560	Down	-0.20653	0.0980487	0.0365927
ISC/EB-prol	LOC5564364	LOC120430842	LOC5564364|AAEL013783	Down	-0.208414	0.0656865	0.00239952
ISC/EB-prol	LOC5578941	LOC120431639	LOC5578941|AAEL003769	Down	-0.20987	0.0828501	0.0089982
ISC/EB-prol	LOC5568680	LOC120414160	LOC5568680|AAEL007029	Down	-0.213428	0.0631784	0.00201634
ISC/EB-prol	LOC5568633	LOC120414661	LOC5568633|AAEL007023	Down	-0.213791	0.0341891	0.00106074
ISC/EB-prol	LOC5570707	LOC120419614	LOC5570707|AAEL001446	Down	-0.215528	0.107628	0.0479904
ISC/EB-prol	LOC5568743	LOC120413446	LOC5568743|AAEL007092	Down	-0.215597	0.0606536	0.00131648
ISC/EB-prol	LOC5563687	LOC120416712	LOC5563687|AAEL020625	Down	-0.219908	0.109792	0.0429914
ISC/EB-prol	LOC5569157	LOC120412598	LOC5569157|AAEL022180	Down	-0.220284	0.0697472	0.00548955
ISC/EB-prol	LOC5572314	LOC120418118	LOC5572314|AAEL022930	Down	-0.221174	0.109851	0.044791
ISC/EB-prol	LOC5564212	LOC120420076	LOC5564212|AAEL004151	Down	-0.221549	0.0121574	0.000116157
ISC/EB-prol	LOC5575982	LOC120428324	LOC5575982|AAEL019430	Down	-0.225441	0.0752363	0.00259948
ISC/EB-prol	LOC5573537	LOC120418336	LOC5573537|AAEL010596	Down	-0.22608	0.104184	0.0311938
ISC/EB-prol	LOC5579816	LOC120415024	LOC5579816|AAEL018059	Down	-0.226507	0.105903	0.0311938
ISC/EB-prol	LOC5576631	LOC120417833	LOC5576631|AAEL019597	Down	-0.226811	0.0766391	0.00359928
ISC/EB-prol	LOC5571173	LOC120425282	LOC5571173|AAEL008871	Down	-0.227254	0.048123	0.00188143
ISC/EB-prol	LOC5572840	LOC120426575	LOC5572840|AAEL010063	Down	-0.229697	0.0332893	6.60685e-05
ISC/EB-prol	LOC5570148	LOC120420932	LOC5570148|AAEL008134	Down	-0.230724	0.0948865	0.0173965
ISC/EB-prol	LOC5571596	LOC120430781	LOC5571596|AAEL009185	Down	-0.230967	0.034743	3.99944e-05
ISC/EB-prol	LOC5576653	LOC120432390	LOC5576653|AAEL012686	Down	-0.23368	0.0111144	1.34429e-07
ISC/EB-prol	LOC5577478	LOC120412343	LOC5577478|AAEL013221	Down	-0.233789	0.0107981	6.33004e-06
ISC/EB-prol	LOC5572799	LOC120412826	LOC5572799|AAEL001904	Down	-0.234246	0.0432977	0.000190903
ISC/EB-prol	LOC5574485	LOC120414767	LOC5574485|AAEL002372	Down	-0.234518	0.0116598	0.000190412
ISC/EB-prol	LOC5579027	LOC120414317	LOC5579027|AAEL013966	Down	-0.235106	0.0825694	0.00459908
ISC/EB-prol	LOC5570828	LOC120427960	LOC5570828|AAEL008605	Down	-0.235422	0.0804346	0.00259948
ISC/EB-prol	LOC5566888	LOC120413787	LOC5566888|AAEL000807	Down	-0.236604	0.0630186	0.00105414
ISC/EB-prol	LOC5570675	LOC120417799	LOC5570675|AAEL008481	Down	-0.236841	0.0109598	0.000171517
ISC/EB-prol	LOC5567031	LOC120421236	LOC5567031|AAEL005766	Down	-0.237761	0.0264834	3.62645e-05
ISC/EB-prol	LOC5566059	LOC120425962	LOC5566059|AAEL005143	Down	-0.239276	0.0351679	3.03544e-05
ISC/EB-prol	LOC5573827	LOC120421466	LOC5573827|AAEL010756	Down	-0.241588	0.0109396	1.32057e-06
ISC/EB-prol	LOC5575109	LOC120427993	LOC5575109|AAEL011650	Down	-0.245671	0.101305	0.014997
ISC/EB-prol	LOC5578851	LOC120418990	LOC5578851|AAEL022689	Down	-0.248805	0.084636	0.00339932
ISC/EB-prol	LOC5577389	LOC120422719	LOC5577389|AAEL000468	Down	-0.249285	0.0939132	0.0111978
ISC/EB-prol	LOC5566689	LOC120423908	LOC5566689|AAEL005579	Down	-0.252216	0.0593677	0.000406557
ISC/EB-prol	LOC5576646	LOC120421528	LOC5576646|AAEL021805	Down	-0.254731	0.112074	0.0213957
ISC/EB-prol	LOC5578220	LOC120422826	LOC5578220|AAEL003487	Down	-0.255305	0.0837997	0.00279944
ISC/EB-prol	LOC5565922	LOC120412468	LOC5565922|AAEL000709	Down	-0.255693	0.056937	0.000102367
ISC/EB-prol	LOC5566651	LOC120431913	LOC5566651|AAEL005500	Down	-0.256247	0.0802884	0.0031514
ISC/EB-prol	LOC5575828	LOC120415057	LOC5575828|AAEL012095	Down	-0.25723	0.0630636	0.000756981
ISC/EB-prol	LOC5565441	LOC120422206	LOC5565441|AAEL000641	Down	-0.262862	0.0319213	2.67182e-06
ISC/EB-prol	LOC5571785	LOC120416386	LOC5571785|AAEL009313	Down	-0.263785	0.0209573	3.19908e-05
ISC/EB-prol	LOC5575032	LOC120428214	LOC5575032|AAEL011584	Down	-0.264617	0.0471871	0.000369587
ISC/EB-prol	LOC5573015	LOC120413491	LOC5573015|AAEL001916	Down	-0.266639	0.0449863	0.000134887
ISC/EB-prol	LOC5576242	LOC120428196	LOC5576242|AAEL002835	Down	-0.267856	0.0619316	0.000806449
ISC/EB-prol	LOC5574564	LOC120424502	LOC5574564|AAEL011240	Down	-0.26876	0.0838045	0.00322985
ISC/EB-prol	LOC5572929	LOC120413554	LOC5572929|AAEL010148	Down	-0.26884	0.066409	0.000761358
ISC/EB-prol	LOC5563955	LOC120425656	LOC5563955|AAEL004040	Down	-0.270423	0.0746639	0.0017336
ISC/EB-prol	LOC5566699	LOC120423878	LOC5566699|AAEL019458	Down	-0.27054	0.0642564	0.000724303
ISC/EB-prol	LOC5571059	LOC120414819	LOC5571059|AAEL008793	Down	-0.270601	0.0944763	0.00439912
ISC/EB-prol	LOC5568807	LOC120425916	LOC5568807|AAEL001177	Down	-0.270753	0.0710948	0.00104876
ISC/EB-prol	LOC5573312	LOC120430273	LOC5573312|AAEL010416	Down	-0.27077	0.040586	0.000233656
ISC/EB-prol	LOC5576737	LOC120426245	LOC5576737|AAEL002978	Down	-0.27155	0.0836314	0.0029994
ISC/EB-prol	LOC5569700	LOC120420492	LOC5569700|AAEL007845	Down	-0.272078	0.03574	0.000575488
ISC/EB-prol	LOC5566167	LOC120415202	LOC5566167|AAEL005238	Down	-0.272081	0.0804336	0.00249884
ISC/EB-prol	LOC5572484	LOC120424064	LOC5572484|AAEL019518	Down	-0.273579	0.0839456	0.00262718
ISC/EB-prol	LOC5578149	LOC120431194	LOC5578149|AAEL013530	Down	-0.274768	0.0931011	0.00319936
ISC/EB-prol	LOC5570619	LOC120424934	LOC5570619|AAEL008425	Down	-0.275319	0.0720108	0.00409832
ISC/EB-prol	LOC5576103	LOC120417445	LOC5576103|AAEL002797	Down	-0.276135	0.0716397	0.000781269
ISC/EB-prol	LOC5574723	LOC120432170	LOC5574723|AAEL011357	Down	-0.276425	0.099925	0.0079984
ISC/EB-prol	LOC5579374	LOC120430970	LOC5579374|AAEL023497	Down	-0.276534	0.0962708	0.00319936
ISC/EB-prol	LOC5569183	LOC120417350	LOC5569183|AAEL007439	Down	-0.28195	0.0233717	3.54179e-05
ISC/EB-prol	LOC5575759	LOC120421741	LOC5575759|AAEL019529	Down	-0.2827	0.10559	0.0069986
ISC/EB-prol	LOC5566946	LOC120429940	LOC5566946|AAEL005726	Down	-0.283025	0.0815882	0.00205358
ISC/EB-prol	LOC5564124	LOC120428923	LOC5564124|AAEL004086	Down	-0.284299	0.0892117	0.00329332
ISC/EB-prol	LOC5567253	LOC120416799	LOC5567253|AAEL005926	Down	-0.284668	0.0983126	0.00479904
ISC/EB-prol	LOC5564272	LOC120417539	LOC5564272|AAEL014368	Down	-0.284873	0.0952374	0.00259948
ISC/EB-prol	LOC5574626	LOC120422553	LOC5574626|AAEL011264	Down	-0.285265	0.0965398	0.00479904
ISC/EB-prol	LOC5570136	LOC120416144	LOC5570136|AAEL008105	Down	-0.288576	0.0555161	0.000443402
ISC/EB-prol	LOC5568836	LOC120413772	LOC5568836|AAEL001188	Down	-0.289216	0.0998775	0.00459908
ISC/EB-prol	LOC5564541	LOC120426262	LOC5564541|AAEL004307	Down	-0.291759	0.0626072	0.000478309
ISC/EB-prol	LOC5570947	LOC120428697	LOC5570947|AAEL008679	Down	-0.292671	0.0952076	0.00303595
ISC/EB-prol	LOC5569186	LOC120419785	LOC5569186|AAEL007447	Down	-0.296438	0.0820333	0.00141142
ISC/EB-prol	LOC5564545	LOC120430859	LOC5564545|AAEL004308	Down	-0.298674	0.0659673	0.000763434
ISC/EB-prol	LOC5564361	LOC120430840	LOC5564361|AAEL020132	Down	-0.299737	0.0956186	0.00239952
ISC/EB-prol	LOC5577072	LOC120426037	LOC5577072|AAEL003108	Down	-0.301463	0.0923115	0.00190809
ISC/EB-prol	LOC5568476	LOC120419491	LOC5568476|AAEL006886	Down	-0.305214	0.0463026	0.000212005
ISC/EB-prol	LOC5570959	LOC120419383	LOC5570959|AAEL008696	Down	-0.30672	0.067073	0.00265377
ISC/EB-prol	LOC110675493	LOC120412866	LOC110675493|AAEL028043	Down	-0.311416	0.0104757	1.52915e-06
ISC/EB-prol	LOC5568408	LOC120424313	LOC5568408|AAEL006829	Down	-0.314598	0.0376398	4.9092e-05
ISC/EB-prol	LOC5568331	LOC120421045	LOC5568331|AAEL001094	Down	-0.316375	0.0349677	5.48153e-05
ISC/EB-prol	LOC5580030	LOC120431174	LOC5580030|AAEL009653	Down	-0.316616	0.0111468	2.25343e-07
ISC/EB-prol	LOC5570686	LOC120415720	LOC5570686|AAEL008500	Down	-0.319847	0.0531767	0.000196686
ISC/EB-prol	LOC5577893	LOC120426138	LOC5577893|AAEL013407	Down	-0.320156	0.0417333	4.27154e-05
ISC/EB-prol	LOC5575696	LOC120425529	LOC5575696|AAEL012010	Down	-0.320749	0.0415966	2.07077e-05
ISC/EB-prol	LOC5572967	LOC120412992	LOC5572967|AAEL010159	Down	-0.32095	0.0435497	0.000101851
ISC/EB-prol	LOC5565372	LOC120424896	LOC5565372|AAEL004755	Down	-0.322221	0.0737638	0.0006701
ISC/EB-prol	LOC5565621	LOC120413156	LOC5565621|AAEL020696	Down	-0.322865	0.0508132	0.000111711
ISC/EB-prol	LOC5571875	LOC120427336	LOC5571875|AAEL009371	Down	-0.325804	0.113084	0.00479904
ISC/EB-prol	LOC5577327	LOC120427940	LOC5577327|AAEL000410	Down	-0.326808	0.0552638	8.95858e-05
ISC/EB-prol	LOC5578368	LOC120415684	LOC5578368|AAEL003530	Down	-0.326894	0.0111322	8.26816e-07
ISC/EB-prol	LOC5569552	LOC120412379	LOC5569552|AAEL019980	Down	-0.327463	0.101734	0.00317164
ISC/EB-prol	LOC5573963	LOC120426320	LOC5573963|AAEL010826	Down	-0.328012	0.0254362	0.000456189
ISC/EB-prol	LOC5569443	LOC120426030	LOC5569443|AAEL001232	Down	-0.329489	0.047148	0.00020146
ISC/EB-prol	LOC5567819	LOC120419098	LOC5567819|AAEL018151	Down	-0.329814	0.11039	0.0029994
ISC/EB-prol	LOC5567491	LOC120425102	LOC5567491|AAEL000951	Down	-0.329894	0.0153331	0.000171699
ISC/EB-prol	LOC5570041	LOC120416629	LOC5570041|AAEL000172	Down	-0.332915	0.0607513	0.000348996
ISC/EB-prol	LOC5574866	LOC120413062	LOC5574866|AAEL011471	Down	-0.3333	0.0104221	9.58886e-05
ISC/EB-prol	LOC5565328	LOC120416772	LOC5565328|AAEL004727	Down	-0.334096	0.0640101	0.000165006
ISC/EB-prol	LOC5567360	LOC120415448	LOC5567360|AAEL020113	Down	-0.334588	0.0795857	0.000661811
ISC/EB-prol	LOC5564626	LOC120428815	LOC5564626|AAEL014549	Down	-0.33475	0.0763162	0.000621809
ISC/EB-prol	LOC5573600	LOC120422068	LOC5573600|AAEL002119	Down	-0.33656	0.0717335	0.0020729
ISC/EB-prol	LOC5564179	LOC120414427	LOC5564179|AAEL004141	Down	-0.337224	0.049332	6.03415e-05
ISC/EB-prol	LOC5572432	LOC120419803	LOC5572432|AAEL001810	Down	-0.338504	0.0598809	0.000170283
ISC/EB-prol	LOC5570821	LOC120427959	LOC5570821|AAEL008594	Down	-0.340002	0.0729015	0.000525666
ISC/EB-prol	LOC5566652	LOC120417699	LOC5566652|AAEL012472	Down	-0.340924	0.0998979	0.00174103
ISC/EB-prol	LOC5563919	LOC120418531	LOC5563919|AAEL001277	Down	-0.34219	0.0845213	0.000936716
ISC/EB-prol	LOC5565051	LOC120425480	LOC5565051|AAEL004563	Down	-0.343637	0.0790567	0.000679891
ISC/EB-prol	LOC5570558	LOC120413681	LOC5570558|AAEL008364	Down	-0.344298	0.0791436	0.000424259
ISC/EB-prol	LOC5572730	LOC120428995	LOC5572730|AAEL010004	Down	-0.346825	0.0797222	0.000370764
ISC/EB-prol	LOC5564681	LOC120429283	LOC5564681|AAEL008334	Down	-0.348915	0.0812824	0.000814372
ISC/EB-prol	LOC5573407	LOC120420233	LOC5573407|AAEL002077	Down	-0.349775	0.0626555	0.000118613
ISC/EB-prol	LOC5570335	LOC120429710	LOC5570335|AAEL019669	Down	-0.350651	0.0203599	2.34778e-07
ISC/EB-prol	LOC5578022	LOC120422250	LOC5578022|AAEL003373	Down	-0.352607	0.06319	0.000167185
ISC/EB-prol	LOC5573835	LOC120416203	LOC5573835|AAEL010755	Down	-0.352791	0.0999081	0.00214002
ISC/EB-prol	LOC5573548	LOC120420100	LOC5573548|AAEL010589	Down	-0.354473	0.0970344	0.00145858
ISC/EB-prol	LOC5574526	LOC120421049	LOC5574526|AAEL011197	Down	-0.354485	0.0157228	9.7203e-05
ISC/EB-prol	LOC5580330	LOC120422788	LOC5580330|AAEL013071	Down	-0.356993	0.053702	6.56697e-05
ISC/EB-prol	LOC5565353	LOC120424907	LOC5565353|AAEL004738	Down	-0.358272	0.0577407	0.000432442
ISC/EB-prol	LOC5577544	LOC120415559	LOC5577544|AAEL013256	Down	-0.359762	0.0894012	0.000703716
ISC/EB-prol	LOC5573007	LOC120418658	LOC5573007|AAEL001925	Down	-0.359781	0.0660959	0.000250194
ISC/EB-prol	LOC5578622	LOC120413362	LOC5578622|AAEL003606	Down	-0.360595	0.0598108	2.33995e-05
ISC/EB-prol	LOC5567075	LOC120428667	LOC5567075|AAEL005799	Down	-0.361729	0.0881316	0.00068636
ISC/EB-prol	LOC5572759	LOC120420123	LOC5572759|AAEL010017	Down	-0.362025	0.028868	2.03332e-07
ISC/EB-prol	LOC5567118	LOC120422285	LOC5567118|AAEL015304	Down	-0.363058	0.0776524	0.00210684
ISC/EB-prol	LOC5571414	LOC120423737	LOC5571414|AAEL009041	Down	-0.366152	0.0519314	0.0001007
ISC/EB-prol	LOC23687841	LOC120425472	LOC23687841|AAEL017421	Down	-0.367956	0.0501146	2.51479e-05
ISC/EB-prol	LOC5565386	LOC120422900	LOC5565386|AAEL004757	Down	-0.368931	0.0820094	0.000220153
ISC/EB-prol	LOC5573673	LOC120412918	LOC5573673|AAEL019604	Down	-0.37029	0.0301631	1.19389e-05
ISC/EB-prol	LOC5580105	LOC120426429	LOC5580105|AAEL010933	Down	-0.370328	0.107719	0.00115951
ISC/EB-prol	LOC5566563	LOC120420009	LOC5566563|AAEL005493	Down	-0.373649	0.0609235	0.000148795
ISC/EB-prol	LOC5573704	LOC120424973	LOC5573704|AAEL010698	Down	-0.374142	0.0831818	0.000396315
ISC/EB-prol	LOC5576420	LOC120412631	LOC5576420|AAEL012507	Down	-0.376295	0.0680726	0.000310302
ISC/EB-prol	LOC5574976	LOC120424532	LOC5574976|AAEL002501	Down	-0.376562	0.0417458	0.000388254
ISC/EB-prol	LOC5573375	LOC120426011	LOC5573375|AAEL010473	Down	-0.377961	0.110265	0.00216608
ISC/EB-prol	LOC5566987	LOC120414592	LOC5566987|AAEL005742	Down	-0.379313	0.0864513	0.00033564
ISC/EB-prol	LOC5568611	LOC120415585	LOC5568611|AAEL006976	Down	-0.381714	0.0481026	6.22368e-06
ISC/EB-prol	LOC5579032	LOC120419483	LOC5579032|AAEL013969	Down	-0.382359	0.0554198	3.77997e-05
ISC/EB-prol	LOC5574598	LOC120423826	LOC5574598|AAEL002407	Down	-0.382605	0.102306	0.00115097
ISC/EB-prol	LOC5580239	LOC120419134	LOC5580239|AAEL012326	Down	-0.382738	0.0218472	4.84931e-07
ISC/EB-prol	LOC5564723	LOC120420374	LOC5564723|AAEL004415	Down	-0.385172	0.107809	0.00126178
ISC/EB-prol	LOC5578603	LOC120412741	LOC5578603|AAEL023219	Down	-0.389059	0.0978151	0.00148706
ISC/EB-prol	LOC5569466	LOC120420228	LOC5569466|AAEL007662	Down	-0.389179	0.0422048	0.000741919
ISC/EB-prol	LOC5569553	LOC120412406	LOC5569553|AAEL007758	Down	-0.39043	0.0657859	0.000137488
ISC/EB-prol	LOC5574494	LOC120428000	LOC5574494|AAEL002377	Down	-0.39199	0.0569417	0.000117184
ISC/EB-prol	LOC5575386	LOC120428134	LOC5575386|AAEL011789	Down	-0.393985	0.0449669	2.20422e-05
ISC/EB-prol	LOC5564713	LOC120432237	LOC5564713|AAEL014583	Down	-0.397557	0.0107369	8.71818e-05
ISC/EB-prol	LOC5564517	LOC120421541	LOC5564517|AAEL004291	Down	-0.400257	0.0593849	9.52156e-05
ISC/EB-prol	LOC5570159	LOC120420944	LOC5570159|AAEL008131	Down	-0.402125	0.0580213	1.93973e-05
ISC/EB-prol	LOC5570989	LOC120418273	LOC5570989|AAEL008719	Down	-0.403749	0.0594956	6.45427e-05
ISC/EB-prol	LOC5579854	LOC120415006	LOC5579854|AAEL005856	Down	-0.403875	0.100164	0.00116529
ISC/EB-prol	LOC5576079	LOC120413184	LOC5576079|AAEL012317	Down	-0.40399	0.0506311	3.05093e-05
ISC/EB-prol	LOC5570142	LOC120416133	LOC5570142|AAEL019814	Down	-0.408077	0.103777	0.00159416
ISC/EB-prol	LOC5580315	LOC120419834	LOC5580315|AAEL012897	Down	-0.408129	0.0582914	0.000991169
ISC/EB-prol	LOC5571156	LOC120414677	LOC5571156|AAEL008837	Down	-0.408581	0.0925611	0.00072918
ISC/EB-prol	LOC5573337	LOC120426769	LOC5573337|AAEL010430	Down	-0.41438	0.0752394	0.00145835
ISC/EB-prol	LOC5576440	LOC120418978	LOC5576440|AAEL005536	Down	-0.41891	0.0425801	2.12914e-05
ISC/EB-prol	LOC5571444	LOC120427613	LOC5571444|AAEL009080	Down	-0.41957	0.0617576	7.07915e-05
ISC/EB-prol	LOC5568471	LOC120429766	LOC5568471|AAEL006885	Down	-0.420154	0.0174277	0.000123197
ISC/EB-prol	LOC5575687	LOC120421841	LOC5575687|AAEL013713	Down	-0.420267	0.062778	0.00140888
ISC/EB-prol	LOC5573492	LOC120418399	LOC5573492|AAEL010538	Down	-0.420357	0.0735317	0.000146515
ISC/EB-prol	LOC5563786	LOC120414851	LOC5563786|AAEL003942	Down	-0.421712	0.0113217	5.63902e-08
ISC/EB-prol	LOC5571570	LOC120417762	LOC5571570|AAEL009155	Down	-0.424161	0.0934898	0.000144822
ISC/EB-prol	LOC5565916	LOC120412650	LOC5565916|AAEL000682	Down	-0.425238	0.0922844	0.000238057
ISC/EB-prol	LOC5565159	LOC120423560	LOC5565159|AAEL004613	Down	-0.426836	0.0715812	8.00278e-05
ISC/EB-prol	LOC5577739	LOC120418136	LOC5577739|AAEL019455	Down	-0.427401	0.0942382	0.000427866
ISC/EB-prol	LOC5567962	LOC120422390	LOC5567962|AAEL019461	Down	-0.429553	0.079313	0.000439366
ISC/EB-prol	LOC5577549	LOC120415529	LOC5577549|AAEL013253	Down	-0.431202	0.0904718	0.000294104
ISC/EB-prol	LOC5564146	LOC120425594	LOC5564146|AAEL014325	Down	-0.431743	0.0806474	0.000431204
ISC/EB-prol	LOC5570297	LOC120414472	LOC5570297|AAEL008234	Down	-0.432215	0.0915909	0.000655768
ISC/EB-prol	LOC5565025	LOC120422466	LOC5565025|AAEL014702	Down	-0.432733	0.0660638	0.000258583
ISC/EB-prol	LOC5569070	LOC120413859	LOC5569070|AAEL001207	Down	-0.43314	0.102974	0.000656508
ISC/EB-prol	LOC5580073	LOC120419278	LOC5580073|AAEL002158	Down	-0.43403	0.0440455	3.37749e-05
ISC/EB-prol	LOC5570616	LOC120416790	LOC5570616|AAEL008434	Down	-0.434336	0.0470923	6.42146e-05
ISC/EB-prol	LOC5574345	LOC120423775	LOC5574345|AAEL002324	Down	-0.439598	0.0674393	6.8327e-05
ISC/EB-prol	LOC5578313	LOC120421966	LOC5578313|AAEL013625	Down	-0.440876	0.0116474	6.28416e-05
ISC/EB-prol	LOC5573939	LOC120426886	LOC5573939|AAEL019753	Down	-0.441283	0.0732237	0.000131974
ISC/EB-prol	LOC5566442	LOC120428165	LOC5566442|AAEL005384	Down	-0.442458	0.0910756	0.000365429
ISC/EB-prol	LOC5570653	LOC120420181	LOC5570653|AAEL008461	Down	-0.442793	0.0464233	7.70606e-05
ISC/EB-prol	LOC110676327	LOC120417482	LOC110676327|AAEL027034	Down	-0.442823	0.096272	0.000714581
ISC/EB-prol	LOC5573211	LOC120428267	LOC5573211|AAEL010318	Down	-0.442922	0.0150578	0.000106189
ISC/EB-prol	LOC5570233	LOC120414329	LOC5570233|AAEL008166	Down	-0.443535	0.0349418	3.96974e-05
ISC/EB-prol	LOC5580010	LOC120416356	LOC5580010|AAEL009637	Down	-0.444832	0.0370455	1.346e-05
ISC/EB-prol	LOC5565931	LOC120420757	LOC5565931|AAEL025321	Down	-0.445499	0.037708	1.25286e-05
ISC/EB-prol	LOC5579810	LOC120415056	LOC5579810|AAEL005515	Down	-0.446831	0.0180349	1.23025e-06
ISC/EB-prol	LOC5571418	LOC120422937	LOC5571418|AAEL009059	Down	-0.447854	0.0431581	1.94974e-05
ISC/EB-prol	LOC5569738	LOC120425096	LOC5569738|AAEL007868	Down	-0.447925	0.0332931	1.72294e-05
ISC/EB-prol	LOC5568110	LOC120422833	LOC5568110|AAEL006564	Down	-0.448869	0.0669187	0.000135736
ISC/EB-prol	LOC5572063	LOC120432463	LOC5572063|AAEL019616	Down	-0.449402	0.0677633	2.66611e-05
ISC/EB-prol	LOC5577545	LOC120415534	LOC5577545|AAEL013249	Down	-0.450924	0.0782025	0.0003768
ISC/EB-prol	LOC5576029	LOC120416275	LOC5576029|AAEL012262	Down	-0.451668	0.0464333	6.19942e-06
ISC/EB-prol	LOC5564976	LOC120430190	LOC5564976|AAEL004532	Down	-0.456694	0.0733608	7.99165e-05
ISC/EB-prol	LOC5576046	LOC120416571	LOC5576046|AAEL014932	Down	-0.458801	0.0166896	5.90118e-08
ISC/EB-prol	LOC5567322	LOC120424400	LOC5567322|AAEL005991	Down	-0.459937	0.0746647	0.000313508
ISC/EB-prol	LOC5578360	LOC120415674	LOC5578360|AAEL024675	Down	-0.459946	0.0898844	0.000251911
ISC/EB-prol	LOC5568016	LOC120416638	LOC5568016|AAEL006473	Down	-0.462112	0.0992651	0.000666101
ISC/EB-prol	LOC110673996	LOC120414405	LOC110673996|-	Down	-0.462371	0.0893553	0.000277601
ISC/EB-prol	LOC5566119	LOC120430974	LOC5566119|AAEL022497	Down	-0.462624	0.0735294	9.98186e-05
ISC/EB-prol	LOC5575103	LOC120426999	LOC5575103|AAEL011657	Down	-0.46323	0.0487836	0.000103136
ISC/EB-prol	LOC5577382	LOC120418266	LOC5577382|AAEL018314	Down	-0.464448	0.0904785	0.000154191
ISC/EB-prol	LOC5573443	LOC120413873	LOC5573443|AAEL010491	Down	-0.465383	0.0924991	0.000321128
ISC/EB-prol	LOC5571763	LOC120429775	LOC5571763|AAEL009287	Down	-0.465949	0.0298629	2.3895e-05
ISC/EB-prol	LOC5566298	LOC120424385	LOC5566298|AAEL000746	Down	-0.466177	0.0495451	2.91925e-05
ISC/EB-prol	LOC5563654	LOC120415918	LOC5563654|AAEL000091	Down	-0.467894	0.0872878	8.54021e-05
ISC/EB-prol	LOC5569497	LOC120428097	LOC5569497|AAEL007681	Down	-0.471866	0.0566111	0.000108548
ISC/EB-prol	LOC5568239	LOC120419964	LOC5568239|AAEL006684	Down	-0.474748	0.0848045	0.000229846
ISC/EB-prol	LOC5578382	LOC120431856	LOC5578382|AAEL013661	Down	-0.479698	0.0181189	9.97463e-05
ISC/EB-prol	LOC5577568	LOC120412428	LOC5577568|AAEL013279	Down	-0.479706	0.0289059	1.50961e-05
ISC/EB-prol	LOC5576501	LOC120430880	LOC5576501|AAEL012552	Down	-0.4806	0.07422	0.000148851
ISC/EB-prol	LOC5568202	LOC120421686	LOC5568202|AAEL006634	Down	-0.481063	0.0522381	9.765e-06
ISC/EB-prol	LOC5569496	LOC120428085	LOC5569496|AAEL007682	Down	-0.482247	0.0620398	3.88541e-05
ISC/EB-prol	LOC5569310	LOC120428306	LOC5569310|AAEL007549	Down	-0.482649	0.0306427	3.07059e-06
ISC/EB-prol	LOC5572548	LOC120430683	LOC5572548|AAEL009874	Down	-0.484039	0.0637683	8.06408e-05
ISC/EB-prol	LOC5574245	LOC120414948	LOC5574245|AAEL011019	Down	-0.484362	0.0686385	0.00122866
ISC/EB-prol	LOC5572845	LOC120425769	LOC5572845|AAEL010057	Down	-0.485692	0.0788832	0.000338807
ISC/EB-prol	LOC5571080	LOC120414792	LOC5571080|AAEL008787	Down	-0.486187	0.0420599	3.54186e-05
ISC/EB-prol	LOC5566415	LOC120419150	LOC5566415|AAEL006036	Down	-0.487121	0.089255	0.000170282
ISC/EB-prol	LOC5567515	LOC120414520	LOC5567515|AAEL006139	Down	-0.487207	0.094015	0.000363947
ISC/EB-prol	LOC5570895	LOC120413539	LOC5570895|AAEL001496	Down	-0.492082	0.0918827	0.000150212
ISC/EB-prol	LOC23687516	LOC120427560	LOC23687516|AAEL017096	Down	-0.493367	0.0105502	2.12757e-07
ISC/EB-prol	LOC110675582	LOC120427329	LOC110675582|AAEL025065	Down	-0.493618	0.10675	0.000350577
ISC/EB-prol	LOC5570208	LOC120414355	LOC5570208|AAEL008169	Down	-0.495289	0.080256	0.00134946
ISC/EB-prol	LOC5577678	LOC120423847	LOC5577678|AAEL013314	Down	-0.496146	0.0559525	3.47971e-05
ISC/EB-prol	LOC5577555	LOC120426190	LOC5577555|AAEL013267	Down	-0.496355	0.071718	6.44465e-05
ISC/EB-prol	LOC5571907	LOC120415869	LOC5571907|AAEL009414	Down	-0.497316	0.0516231	5.12124e-05
ISC/EB-prol	LOC5579160	LOC120412693	LOC5579160|AAEL003883	Down	-0.497866	0.0650981	1.38707e-05
ISC/EB-prol	LOC5567152	LOC120421399	LOC5567152|AAEL005903	Down	-0.50556	0.0917975	0.000357393
ISC/EB-prol	LOC5577719	LOC120414695	LOC5577719|AAEL013353	Down	-0.507054	0.0188702	9.51363e-05
ISC/EB-prol	LOC5574519	LOC120425589	LOC5574519|AAEL011192	Down	-0.507425	0.110568	0.000588736
ISC/EB-prol	LOC5567565	LOC120413276	LOC5567565|AAEL006169	Down	-0.507995	0.0449769	6.48204e-06
ISC/EB-prol	LOC5567587	LOC120413963	LOC5567587|AAEL006186	Down	-0.508701	0.0613761	5.00832e-05
ISC/EB-prol	LOC5580011	LOC120416109	LOC5580011|AAEL009634	Down	-0.509978	0.0823952	2.78625e-05
ISC/EB-prol	LOC5575683	LOC120418948	LOC5575683|AAEL011989	Down	-0.511214	0.0596209	0.000100828
ISC/EB-prol	LOC5570031	LOC120416633	LOC5570031|AAEL020695	Down	-0.515271	0.0956433	0.00021522
ISC/EB-prol	LOC5568468	LOC120429771	LOC5568468|AAEL006887	Down	-0.517395	0.106598	0.00036815
ISC/EB-prol	LOC5577489	LOC120414898	LOC5577489|AAEL013229	Down	-0.519496	0.0288869	3.45763e-06
ISC/EB-prol	LOC5571804	LOC120420202	LOC5571804|AAEL009324	Down	-0.520769	0.0834712	0.000910322
ISC/EB-prol	LOC5580164	LOC120420713	LOC5580164|AAEL002557	Down	-0.520828	0.0706746	0.000778615
ISC/EB-prol	LOC5568113	LOC120422824	LOC5568113|AAEL006557	Down	-0.52171	0.0714086	6.75643e-05
ISC/EB-prol	LOC5570794	LOC120414433	LOC5570794|AAEL008569	Down	-0.523031	0.0635924	2.33015e-05
ISC/EB-prol	LOC5577456	LOC120414352	LOC5577456|AAEL013199	Down	-0.523968	0.0703496	9.52214e-05
ISC/EB-prol	LOC5567163	LOC120421718	LOC5567163|AAEL005901	Down	-0.524575	0.0122529	7.76389e-05
ISC/EB-prol	LOC5575846	LOC120432447	LOC5575846|AAEL012119	Down	-0.528775	0.0767813	9.86514e-05
ISC/EB-prol	LOC5571685	LOC120426394	LOC5571685|AAEL009214	Down	-0.530081	0.046504	1.96316e-06
ISC/EB-prol	LOC5569287	LOC120419104	LOC5569287|AAEL007539	Down	-0.530396	0.0985286	0.000486962
ISC/EB-prol	LOC5567821	LOC120419072	LOC5567821|AAEL000986	Down	-0.531963	0.0389949	3.72162e-06
ISC/EB-prol	LOC5575971	LOC120427435	LOC5575971|AAEL012218	Down	-0.532071	0.0873253	0.000132171
ISC/EB-prol	LOC5577723	LOC120414684	LOC5577723|AAEL013359	Down	-0.533332	0.0127786	6.34002e-05
ISC/EB-prol	LOC5578888	LOC120427663	LOC5578888|AAEL019465	Down	-0.533634	0.0862237	0.00017747
ISC/EB-prol	LOC5578119	LOC120416813	LOC5578119|AAEL003412	Down	-0.533939	0.061173	1.90951e-05
ISC/EB-prol	LOC5568428	LOC120417010	LOC5568428|AAEL006836	Down	-0.538239	0.0778414	9.47659e-05
ISC/EB-prol	LOC5571450	LOC120427611	LOC5571450|AAEL009078	Down	-0.539432	0.0540125	2.14504e-05
ISC/EB-prol	LOC5571237	LOC120417650	LOC5571237|AAEL008924	Down	-0.545549	0.0934292	0.000136543
ISC/EB-prol	LOC5564041	LOC120418066	LOC5564041|AAEL004042	Down	-0.547641	0.0444431	0.000372448
ISC/EB-prol	LOC5573830	LOC120416219	LOC5573830|AAEL010754	Down	-0.549578	0.0195871	2.93275e-07
ISC/EB-prol	LOC5569011	LOC120422802	LOC5569011|AAEL007291	Down	-0.552876	0.0899616	0.000116381
ISC/EB-prol	LOC5568890	LOC120420805	LOC5568890|AAEL007197	Down	-0.553086	0.0414115	1.58588e-05
ISC/EB-prol	LOC5565652	LOC120415735	LOC5565652|AAEL004902	Down	-0.55358	0.0420127	8.77943e-06
ISC/EB-prol	LOC5578376	LOC120419640	LOC5578376|AAEL019481	Down	-0.556425	0.0616752	1.96357e-05
ISC/EB-prol	LOC5575223	LOC120424290	LOC5575223|AAEL010608	Down	-0.560889	0.0574971	4.18897e-05
ISC/EB-prol	LOC5575478	LOC120417993	LOC5575478|AAEL011865	Down	-0.564117	0.103409	5.90949e-05
ISC/EB-prol	LOC5564842	LOC120424983	LOC5564842|AAEL018350	Down	-0.566348	0.0584291	3.11855e-05
ISC/EB-prol	LOC5569035	LOC120423127	LOC5569035|AAEL026700	Down	-0.567468	0.0704639	4.42259e-05
ISC/EB-prol	LOC5567581	LOC120413072	LOC5567581|AAEL006174	Down	-0.568918	0.0549118	8.2244e-05
ISC/EB-prol	LOC5572582	LOC120425748	LOC5572582|AAEL009898	Down	-0.570146	0.0509446	2.12177e-07
ISC/EB-prol	LOC5568618	LOC120423094	LOC5568618|AAEL006977	Down	-0.572699	0.0456246	1.56614e-05
ISC/EB-prol	LOC5576266	LOC120417524	LOC5576266|AAEL012419	Down	-0.576142	0.058685	3.97352e-05
ISC/EB-prol	LOC5565318	LOC120421121	LOC5565318|AAEL004733	Down	-0.576719	0.0802789	0.000157339
ISC/EB-prol	LOC5564532	LOC120422048	LOC5564532|AAEL014501	Down	-0.587871	0.0881746	4.20593e-05
ISC/EB-prol	LOC5578538	LOC120426800	LOC5578538|AAEL013744	Down	-0.588192	0.0519305	1.58027e-05
ISC/EB-prol	LOC5566901	LOC120416993	LOC5566901|AAEL000854	Down	-0.588261	0.0681696	6.11679e-05
ISC/EB-prol	LOC5569566	LOC120412599	LOC5569566|AAEL007752	Down	-0.59043	0.0252168	8.89799e-05
ISC/EB-prol	LOC5575914	LOC120417470	LOC5575914|AAEL012175	Down	-0.590533	0.0214331	1.12436e-06
ISC/EB-prol	LOC5570108	LOC120413352	LOC5570108|AAEL020238	Down	-0.590561	0.0127734	5.21103e-05
ISC/EB-prol	LOC5566935	LOC120417329	LOC5566935|AAEL005709	Down	-0.59078	0.0755624	4.98996e-05
ISC/EB-prol	LOC5570063	LOC120423637	LOC5570063|AAEL001354	Down	-0.592086	0.0768461	5.34525e-05
ISC/EB-prol	LOC5573494	LOC120418414	LOC5573494|AAEL027554	Down	-0.593316	0.06491	7.19478e-05
ISC/EB-prol	LOC5565060	LOC120425499	LOC5565060|AAEL025769	Down	-0.596155	0.0328261	1.58847e-05
ISC/EB-prol	LOC5564604	LOC120424264	LOC5564604|AAEL014529	Down	-0.596234	0.0778401	8.42321e-05
ISC/EB-prol	LOC5566694	LOC120423890	LOC5566694|AAEL005580	Down	-0.603744	0.0715126	9.50822e-05
ISC/EB-prol	LOC5570524	LOC120427074	LOC5570524|AAEL001422	Down	-0.603895	0.0940017	6.9515e-05
ISC/EB-prol	LOC5575681	LOC120418961	LOC5575681|AAEL011992	Down	-0.604993	0.0408344	2.62502e-05
ISC/EB-prol	LOC5570780	LOC120418831	LOC5570780|AAEL008543	Down	-0.605146	0.0326584	2.44924e-06
ISC/EB-prol	LOC5570735	LOC120421532	LOC5570735|AAEL008517	Down	-0.605219	0.0895217	0.000166238
ISC/EB-prol	LOC5565657	LOC120415766	LOC5565657|AAEL004914	Down	-0.610835	0.0791798	3.25263e-05
ISC/EB-prol	LOC5566238	LOC120421069	LOC5566238|AAEL005261	Down	-0.614137	0.0871475	8.41418e-05
ISC/EB-prol	LOC5579795	LOC120418438	LOC5579795|AAEL003957	Down	-0.618742	0.0186774	3.18877e-07
ISC/EB-prol	LOC5565447	LOC120422214	LOC5565447|AAEL000677	Down	-0.619295	0.0862735	7.35463e-05
ISC/EB-prol	LOC5578007	LOC120432353	LOC5578007|AAEL003371	Down	-0.621776	0.0994995	0.000106952
ISC/EB-prol	LOC5576547	LOC120418907	LOC5576547|AAEL021323	Down	-0.622931	0.0961911	5.72494e-05
ISC/EB-prol	LOC5564782	LOC120419429	LOC5564782|AAEL004427	Down	-0.623046	0.0789195	5.03391e-05
ISC/EB-prol	LOC5566126	LOC120430975	LOC5566126|AAEL005201	Down	-0.626256	0.0854109	0.000188875
ISC/EB-prol	LOC5569898	LOC120431522	LOC5569898|AAEL008002	Down	-0.626736	0.0458022	2.86637e-06
ISC/EB-prol	LOC5578960	LOC120415489	LOC5578960|AAEL013939	Down	-0.628454	0.0712978	5.52486e-05
ISC/EB-prol	LOC5578081	LOC120416819	LOC5578081|AAEL003433	Down	-0.629333	0.0722878	1.76246e-05
ISC/EB-prol	LOC5572791	LOC120412848	LOC5572791|AAEL001896	Down	-0.62986	0.0393639	1.45154e-06
ISC/EB-prol	LOC5575495	LOC120412571	LOC5575495|AAEL011870	Down	-0.631102	0.080792	0.000138155
ISC/EB-prol	LOC5571789	LOC120415975	LOC5571789|AAEL009317	Down	-0.631201	0.0357117	7.12376e-08
ISC/EB-prol	LOC5575843	LOC120415522	LOC5575843|AAEL012122	Down	-0.632853	0.0875977	0.00122324
ISC/EB-prol	LOC5568799	LOC120425907	LOC5568799|AAEL001159	Down	-0.638791	0.0805512	0.000324505
ISC/EB-prol	LOC5566168	LOC120414967	LOC5566168|AAEL019784	Down	-0.641328	0.0923499	5.4033e-05
ISC/EB-prol	LOC5570014	LOC120419565	LOC5570014|AAEL000179	Down	-0.643103	0.0578913	1.16881e-07
ISC/EB-prol	LOC5570055	LOC120429834	LOC5570055|AAEL000159	Down	-0.645233	0.0797466	4.9192e-05
ISC/EB-prol	LOC5575492	LOC120412609	LOC5575492|AAEL011871	Down	-0.645961	0.0337379	0.000130167
ISC/EB-prol	LOC5569753	LOC120413339	LOC5569753|AAEL026440	Down	-0.646374	0.0985875	0.000347834
ISC/EB-prol	LOC5577080	LOC120412395	LOC5577080|AAEL012980	Down	-0.647036	0.0535258	5.08594e-06
ISC/EB-prol	LOC5578104	LOC120416852	LOC5578104|AAEL003428	Down	-0.650564	0.0756191	5.70874e-05
ISC/EB-prol	LOC5573879	LOC120417872	LOC5573879|AAEL010801	Down	-0.657907	0.0258083	3.09067e-07
ISC/EB-prol	LOC23687502	LOC120419184	LOC23687502|AAEL017082	Down	-0.657925	0.0451807	8.9719e-07
ISC/EB-prol	LOC5578996	LOC120424028	LOC5578996|AAEL003777	Down	-0.658841	0.0829796	9.43656e-06
ISC/EB-prol	LOC5566650	LOC120422575	LOC5566650|AAEL015644	Down	-0.661529	0.0620839	2.84096e-05
ISC/EB-prol	LOC5571150	LOC120414675	LOC5571150|AAEL008848	Down	-0.663204	0.0329595	7.68521e-05
ISC/EB-prol	LOC5564133	LOC120428925	LOC5564133|AAEL004088	Down	-0.664533	0.0314243	8.47325e-07
ISC/EB-prol	LOC5569787	LOC120415135	LOC5569787|AAEL023098	Down	-0.668885	0.03627	2.45489e-06
ISC/EB-prol	LOC5574500	LOC120427680	LOC5574500|AAEL023902	Down	-0.671823	0.0719688	3.124e-05
ISC/EB-prol	LOC5565270	LOC120417029	LOC5565270|AAEL004691	Down	-0.672129	0.0322123	7.73773e-05
ISC/EB-prol	LOC5564281	LOC120426084	LOC5564281|AAEL014375	Down	-0.673125	0.0947666	9.74283e-05
ISC/EB-prol	LOC5576927	LOC120428352	LOC5576927|AAEL019449	Down	-0.673731	0.0749879	9.40943e-05
ISC/EB-prol	LOC5564161	LOC120415677	LOC5564161|AAEL004148	Down	-0.674112	0.0348082	1.12846e-06
ISC/EB-prol	LOC5578582	LOC120423138	LOC5578582|AAEL013768	Down	-0.676833	0.0586956	4.50126e-05
ISC/EB-prol	LOC5570205	LOC120414363	LOC5570205|AAEL008167	Down	-0.677325	0.0729767	1.42708e-05
ISC/EB-prol	LOC23687839	LOC120415968	LOC23687839|AAEL017419	Down	-0.680034	0.0202853	1.02892e-06
ISC/EB-prol	LOC5577910	LOC120423988	LOC5577910|AAEL003352	Down	-0.680848	0.0385533	5.0216e-06
ISC/EB-prol	LOC5564724	LOC120419283	LOC5564724|AAEL004404	Down	-0.681987	0.0629587	1.06121e-05
ISC/EB-prol	LOC5569673	LOC120414084	LOC5569673|AAEL007821	Down	-0.684032	0.0977225	0.000105544
ISC/EB-prol	LOC5565805	LOC120419301	LOC5565805|AAEL019932	Down	-0.68423	0.0946937	0.000189107
ISC/EB-prol	LOC5578257	LOC120413155	LOC5578257|AAEL013596	Down	-0.6847	0.0739792	0.00014605
ISC/EB-prol	LOC5573012	LOC120418652	LOC5573012|AAEL001954	Down	-0.685982	0.101828	0.000149573
ISC/EB-prol	LOC5570234	LOC120414330	LOC5570234|AAEL008179	Down	-0.686583	0.0901612	8.4336e-05
ISC/EB-prol	LOC5567286	LOC120427882	LOC5567286|AAEL005946	Down	-0.686816	0.0455073	5.52082e-06
ISC/EB-prol	LOC5572947	LOC120412943	LOC5572947|AAEL010170	Down	-0.68913	0.0744995	2.08869e-05
ISC/EB-prol	LOC5568222	LOC120412965	LOC5568222|AAEL006647	Down	-0.690586	0.0669599	2.5126e-05
ISC/EB-prol	LOC5564469	LOC120418023	LOC5564469|AAEL014452	Down	-0.692956	0.0420611	1.86214e-06
ISC/EB-prol	LOC5577687	LOC120419444	LOC5577687|AAEL013320	Down	-0.693724	0.0667143	8.79633e-05
ISC/EB-prol	LOC5566532	LOC120431192	LOC5566532|AAEL015202	Down	-0.693763	0.0661972	2.92352e-05
ISC/EB-prol	LOC5569864	LOC120415490	LOC5569864|AAEL007944	Down	-0.694514	0.0711639	7.20109e-05
ISC/EB-prol	LOC5579012	LOC120414191	LOC5579012|AAEL003774	Down	-0.695176	0.0833535	5.42456e-06
ISC/EB-prol	LOC5572867	LOC120422701	LOC5572867|AAEL010087	Down	-0.697309	0.0623562	3.12072e-06
ISC/EB-prol	LOC5576840	LOC120426694	LOC5576840|AAEL012825	Down	-0.69903	0.100359	5.12027e-05
ISC/EB-prol	LOC5571265	LOC120419737	LOC5571265|AAEL001588	Down	-0.699731	0.0559423	0.000404099
ISC/EB-prol	LOC5567559	LOC120413278	LOC5567559|AAEL006158	Down	-0.699763	0.0206106	5.57658e-08
ISC/EB-prol	LOC5574995	LOC120424694	LOC5574995|AAEL002523	Down	-0.704024	0.0788868	0.000101275
ISC/EB-prol	LOC5568451	LOC120415185	LOC5568451|AAEL006862	Down	-0.710912	0.0935851	0.000116234
ISC/EB-prol	LOC5576486	LOC120416236	LOC5576486|AAEL002913	Down	-0.711819	0.0874256	7.58031e-05
ISC/EB-prol	LOC5579101	LOC120432658	LOC5579101|AAEL003842	Down	-0.715288	0.045746	1.09921e-05
ISC/EB-prol	LOC5574190	LOC120418575	LOC5574190|AAEL002308	Down	-0.721826	0.035054	1.60886e-06
ISC/EB-prol	LOC5579996	LOC120412890	LOC5579996|AAEL025915	Down	-0.723808	0.0915291	0.000114102
ISC/EB-prol	LOC5568828	LOC120414748	LOC5568828|AAEL001164	Down	-0.724981	0.0477858	0.000263575
ISC/EB-prol	LOC5572640	LOC120414106	LOC5572640|AAEL001838	Down	-0.725054	0.0709568	8.31369e-06
ISC/EB-prol	LOC5577113	LOC120426843	LOC5577113|AAEL008697	Down	-0.726045	0.0251511	8.77983e-07
ISC/EB-prol	LOC5567811	LOC120423004	LOC5567811|AAEL000993	Down	-0.726435	0.0789499	1.00239e-05
ISC/EB-prol	LOC5577071	LOC120423653	LOC5577071|AAEL003106	Down	-0.726543	0.0666479	1.63561e-05
ISC/EB-prol	LOC5570561	LOC120428863	LOC5570561|AAEL008390	Down	-0.730812	0.0841718	2.03231e-05
ISC/EB-prol	LOC5565266	LOC120429495	LOC5565266|AAEL004699	Down	-0.736298	0.0314146	2.29757e-06
ISC/EB-prol	LOC5573705	LOC120424978	LOC5573705|AAEL010691	Down	-0.740396	0.115361	0.000147631
ISC/EB-prol	LOC5578532	LOC120429645	LOC5578532|AAEL013739	Down	-0.741214	0.0620178	7.2012e-06
ISC/EB-prol	LOC5566092	LOC120426846	LOC5566092|AAEL005170	Down	-0.745396	0.0251774	1.91172e-06
ISC/EB-prol	LOC5579467	LOC120432362	LOC5579467|AAEL023603	Down	-0.747321	0.0383646	2.14458e-06
ISC/EB-prol	LOC5572925	LOC120413522	LOC5572925|AAEL010143	Down	-0.747711	0.0813382	7.0909e-05
ISC/EB-prol	LOC5568708	LOC120431538	LOC5568708|AAEL007054	Down	-0.750357	0.0405233	7.77146e-06
ISC/EB-prol	LOC5574496	LOC120428234	LOC5574496|AAEL002399	Down	-0.750591	0.0509165	9.71647e-06
ISC/EB-prol	LOC5580331	LOC120422783	LOC5580331|AAEL013074	Down	-0.7515	0.0307549	1.26037e-06
ISC/EB-prol	LOC5566478	LOC120421015	LOC5566478|AAEL005411	Down	-0.751759	0.0910631	4.67067e-05
ISC/EB-prol	LOC5579863	LOC120423024	LOC5579863|AAEL005976	Down	-0.751935	0.10178	0.000261346
ISC/EB-prol	LOC5564225	LOC120419963	LOC5564225|AAEL023037	Down	-0.752104	0.0591515	4.9534e-05
ISC/EB-prol	LOC5571045	LOC120419516	LOC5571045|AAEL008770	Down	-0.754421	0.0546188	1.60473e-05
ISC/EB-prol	LOC5576214	LOC120418437	LOC5576214|AAEL002827	Down	-0.754809	0.0284857	3.43982e-06
ISC/EB-prol	LOC5567109	LOC120418104	LOC5567109|AAEL005832	Down	-0.755182	0.0655812	6.22265e-05
ISC/EB-prol	LOC5572771	LOC120419015	LOC5572771|AAEL010043	Down	-0.756246	0.0674463	6.43573e-06
ISC/EB-prol	LOC5575668	LOC120412653	LOC5575668|AAEL002687	Down	-0.757764	0.0537056	1.17344e-05
ISC/EB-prol	LOC5574741	LOC120422045	LOC5574741|AAEL011379	Down	-0.758528	0.0937979	2.34835e-05
ISC/EB-prol	LOC5567260	LOC120413950	LOC5567260|AAEL005928	Down	-0.763206	0.0801306	4.53436e-05
ISC/EB-prol	LOC5580056	LOC120414526	LOC5580056|AAEL002174	Down	-0.769225	0.0569588	1.51325e-05
ISC/EB-prol	LOC5571923	LOC120420319	LOC5571923|AAEL009402	Down	-0.769435	0.089501	6.94895e-05
ISC/EB-prol	LOC5575242	LOC120418498	LOC5575242|AAEL011711	Down	-0.770956	0.0188316	1.63882e-06
ISC/EB-prol	LOC5567383	LOC120432196	LOC5567383|AAEL006061	Down	-0.774846	0.0514661	7.94241e-06
ISC/EB-prol	LOC5569539	LOC120425794	LOC5569539|AAEL007713	Down	-0.775385	0.0816559	0.000123115
ISC/EB-prol	LOC5574643	LOC120415849	LOC5574643|AAEL011282	Down	-0.781202	0.101708	8.34892e-05
ISC/EB-prol	LOC5564962	LOC120413234	LOC5564962|AAEL014889	Down	-0.78699	0.0505946	4.05875e-06
ISC/EB-prol	LOC5573995	LOC120413486	LOC5573995|AAEL015118	Down	-0.787076	0.0944295	7.66715e-05
ISC/EB-prol	LOC5566612	LOC120420426	LOC5566612|AAEL000770	Down	-0.787516	0.0913932	7.01043e-05
ISC/EB-prol	LOC5574000	LOC120413449	LOC5574000|AAEL010844	Down	-0.792943	0.0869145	1.98598e-05
ISC/EB-prol	LOC5564895	LOC120414476	LOC5564895|AAEL014642	Down	-0.793543	0.048938	2.30233e-06
ISC/EB-prol	LOC5570443	LOC120429678	LOC5570443|AAEL008336	Down	-0.798221	0.0612449	2.45579e-05
ISC/EB-prol	LOC5577291	LOC120416523	LOC5577291|AAEL013144	Down	-0.803144	0.0278094	2.37118e-06
ISC/EB-prol	LOC110674163	LOC120421779	LOC110674163|AAEL022901	Down	-0.803873	0.0711543	0.000527521
ISC/EB-prol	LOC5568194	LOC120412686	LOC5568194|AAEL006611	Down	-0.804367	0.0739269	3.12557e-05
ISC/EB-prol	LOC23687404	LOC120416302	LOC23687404|AAEL016984	Down	-0.806716	0.0211432	2.82113e-07
ISC/EB-prol	LOC5568246	LOC120419674	LOC5568246|AAEL006685	Down	-0.808243	0.047574	5.28761e-06
ISC/EB-prol	LOC5576201	LOC120423840	LOC5576201|AAEL012394	Down	-0.810903	0.0795743	2.94372e-05
ISC/EB-prol	LOC5569745	LOC120427511	LOC5569745|AAEL007883	Down	-0.813384	0.0238804	6.94841e-07
ISC/EB-prol	LOC110679171	LOC120421370	LOC110679171|AAEL009684	Down	-0.816609	0.0467323	0.000264333
ISC/EB-prol	LOC5578926	LOC120430498	LOC5578926|AAEL003746	Down	-0.817329	0.0501261	1.51995e-05
ISC/EB-prol	LOC5573976	LOC120426075	LOC5573976|AAEL010814	Down	-0.819946	0.087023	6.97446e-05
ISC/EB-prol	LOC5568019	LOC120416657	LOC5568019|AAEL006458	Down	-0.820277	0.0947039	7.2705e-05
ISC/EB-prol	LOC5575182	LOC120412803	LOC5575182|AAEL019826	Down	-0.824041	0.0509481	0.000268966
ISC/EB-prol	LOC5564882	LOC120429830	LOC5564882|AAEL004471	Down	-0.824748	0.0939653	1.99043e-05
ISC/EB-prol	LOC23687928	LOC120424634	LOC23687928|AAEL017508	Down	-0.827302	0.0900395	4.26782e-06
ISC/EB-prol	LOC5564326	LOC120420630	LOC5564326|AAEL019671	Down	-0.829538	0.0869251	1.44982e-05
ISC/EB-prol	LOC5571153	LOC120414669	LOC5571153|AAEL008849	Down	-0.832123	0.0400759	1.10489e-07
ISC/EB-prol	LOC5571755	LOC120419430	LOC5571755|AAEL009278	Down	-0.833972	0.0629668	1.04658e-05
ISC/EB-prol	LOC5578624	LOC120413351	LOC5578624|AAEL003597	Down	-0.836326	0.059761	1.70544e-05
ISC/EB-prol	LOC5580036	LOC120421130	LOC5580036|AAEL010230	Down	-0.837832	0.0428074	3.37335e-06
ISC/EB-prol	LOC5576100	LOC120417440	LOC5576100|AAEL002789	Down	-0.844478	0.077105	6.20704e-05
ISC/EB-prol	LOC5564627	LOC120428820	LOC5564627|AAEL025567	Down	-0.849923	0.0635849	2.10216e-06
ISC/EB-prol	LOC5573625	LOC120425017	LOC5573625|AAEL010610	Down	-0.851194	0.0724539	5.20497e-06
ISC/EB-prol	LOC5564860	LOC120417502	LOC5564860|AAEL004472	Down	-0.853255	0.0399619	5.02794e-07
ISC/EB-prol	LOC5566793	LOC120422288	LOC5566793|AAEL026243	Down	-0.853328	0.0534332	2.05749e-06
ISC/EB-prol	LOC5565513	LOC120425495	LOC5565513|AAEL014863	Down	-0.853353	0.0707862	0.000511914
ISC/EB-prol	LOC5568814	LOC120416311	LOC5568814|AAEL001194	Down	-0.853488	0.0647491	3.60712e-05
ISC/EB-prol	LOC5568284	LOC120426535	LOC5568284|AAEL006711	Down	-0.85444	0.080379	3.99847e-05
ISC/EB-prol	LOC5573894	LOC120425518	LOC5573894|AAEL002184	Down	-0.854866	0.0456946	2.12705e-06
ISC/EB-prol	LOC5578184	LOC128092666	LOC5578184|AAEL003469	Down	-0.856779	0.0619739	4.08304e-06
ISC/EB-prol	LOC5567314	LOC120416091	LOC5567314|AAEL005968	Down	-0.859989	0.0916443	5.06316e-05
ISC/EB-prol	LOC5579259	LOC120414168	LOC5579259|AAEL015653	Down	-0.860077	0.0999152	3.47318e-05
ISC/EB-prol	LOC5578388	LOC120429860	LOC5578388|AAEL013675	Down	-0.860644	0.0341808	5.50805e-07
ISC/EB-prol	LOC5580023	LOC120431208	LOC5580023|AAEL009649	Down	-0.866244	0.0859766	1.37673e-05
ISC/EB-prol	LOC5576767	LOC120424884	LOC5576767|AAEL012751	Down	-0.868624	0.0830621	9.11411e-06
ISC/EB-prol	LOC5578103	LOC120416823	LOC5578103|AAEL003430	Down	-0.868625	0.0591806	1.26837e-05
ISC/EB-prol	LOC5566309	LOC120424465	LOC5566309|AAEL005308	Down	-0.869364	0.0749543	0.000504095
ISC/EB-prol	LOC5576914	LOC120422149	LOC5576914|AAEL012865	Down	-0.871225	0.0500212	3.59289e-06
ISC/EB-prol	LOC5576740	LOC120421197	LOC5576740|AAEL025250	Down	-0.873619	0.04732	0.00019189
ISC/EB-prol	LOC5570958	LOC120419384	LOC5570958|AAEL008687	Down	-0.874094	0.0697502	1.02759e-05
ISC/EB-prol	LOC5573753	LOC120415301	LOC5573753|AAEL000270	Down	-0.874595	0.0837339	4.77524e-05
ISC/EB-prol	LOC5568726	LOC120425377	LOC5568726|AAEL007078	Down	-0.880282	0.05485	1.79535e-05
ISC/EB-prol	LOC110673993	LOC120415467	LOC110673993|AAEL026310	Down	-0.880409	0.0921682	7.9459e-05
ISC/EB-prol	LOC5569520	LOC120419078	LOC5569520|AAEL007707	Down	-0.883154	0.0305596	9.25574e-06
ISC/EB-prol	LOC5571484	LOC120417403	LOC5571484|AAEL001605	Down	-0.886751	0.0596605	7.73404e-06
ISC/EB-prol	LOC5577105	LOC120421110	LOC5577105|AAEL013005	Down	-0.889568	0.103048	6.39042e-05
ISC/EB-prol	LOC5571453	LOC120427608	LOC5571453|AAEL009074	Down	-0.890706	0.0339195	4.60813e-05
ISC/EB-prol	LOC110676030	LOC120431867	LOC110676030|AAEL024500	Down	-0.892368	0.0755084	1.63175e-05
ISC/EB-prol	LOC5579878	LOC120413262	LOC5579878|AAEL001041	Down	-0.892577	0.0774616	3.54202e-05
ISC/EB-prol	LOC5568150	LOC120430393	LOC5568150|AAEL006577	Down	-0.893427	0.052385	7.32583e-06
ISC/EB-prol	LOC5576650	LOC120432385	LOC5576650|AAEL012684	Down	-0.897467	0.0322332	4.03992e-07
ISC/EB-prol	LOC5573121	LOC128092277	LOC5573121|AAEL001974	Down	-0.898557	0.0835981	1.13774e-05
ISC/EB-prol	LOC5573231	LOC120429120	LOC5573231|AAEL010312	Down	-0.898746	0.0912463	2.75701e-05
ISC/EB-prol	LOC5574806	LOC120426794	LOC5574806|AAEL002467	Down	-0.902862	0.0983237	5.44551e-05
ISC/EB-prol	LOC5570571	LOC120417568	LOC5570571|AAEL008379	Down	-0.915033	0.0747265	2.99412e-05
ISC/EB-prol	LOC110681498	LOC120430224	LOC110681498|AAEL023347	Down	-0.916168	0.0490587	0.000156344
ISC/EB-prol	LOC5568520	LOC120416996	LOC5568520|AAEL027905	Down	-0.922585	0.0774444	1.1476e-05
ISC/EB-prol	LOC5566055	LOC120425960	LOC5566055|AAEL005150	Down	-0.922602	0.0775534	3.23509e-06
ISC/EB-prol	LOC5579199	LOC120425011	LOC5579199|AAEL014039	Down	-0.922698	0.0248865	9.62163e-07
ISC/EB-prol	LOC5567501	LOC120429321	LOC5567501|AAEL006115	Down	-0.922955	0.0272604	6.56355e-07
ISC/EB-prol	LOC5571609	LOC120423741	LOC5571609|AAEL009201	Down	-0.923787	0.0251478	4.39811e-08
ISC/EB-prol	LOC5566232	LOC120429984	LOC5566232|AAEL005262	Down	-0.923983	0.0651236	1.70753e-05
ISC/EB-prol	LOC5568553	LOC120426562	LOC5568553|AAEL001109	Down	-0.924107	0.0888137	3.88102e-05
ISC/EB-prol	LOC5564249	LOC120413710	LOC5564249|AAEL004195	Down	-0.925546	0.0760084	8.68915e-07
ISC/EB-prol	LOC5565707	LOC120426940	LOC5565707|AAEL014949	Down	-0.928923	0.0672671	2.94746e-06
ISC/EB-prol	LOC5566538	LOC120432576	LOC5566538|AAEL018342	Down	-0.9336	0.0781415	8.47959e-05
ISC/EB-prol	LOC5578342	LOC128093194	LOC5578342|AAEL003540	Down	-0.934097	0.0812672	4.74083e-05
ISC/EB-prol	LOC5570670	LOC120417824	LOC5570670|AAEL008490	Down	-0.934876	0.0435823	7.28118e-07
ISC/EB-prol	LOC5570553	LOC120413652	LOC5570553|AAEL008374	Down	-0.937567	0.0878826	1.20527e-05
ISC/EB-prol	LOC5575512	LOC120427816	LOC5575512|AAEL011881	Down	-0.938998	0.0689652	1.28881e-05
ISC/EB-prol	LOC110680850	LOC120428466	LOC110680850|-	Down	-0.942346	0.0767441	1.67341e-05
ISC/EB-prol	LOC5577191	LOC120432224	LOC5577191|AAEL013076	Down	-0.944724	0.0948734	7.79343e-05
ISC/EB-prol	LOC5570090	LOC120432597	LOC5570090|AAEL001356	Down	-0.950009	0.0460568	0.000166821
ISC/EB-prol	LOC5573469	LOC120426702	LOC5573469|AAEL010513	Down	-0.952433	0.0683748	2.99706e-05
ISC/EB-prol	LOC5573534	LOC120418337	LOC5573534|AAEL010584	Down	-0.953842	0.0967437	0.000114862
ISC/EB-prol	LOC5573990	LOC120413438	LOC5573990|AAEL010840	Down	-0.957352	0.0549736	7.12643e-07
ISC/EB-prol	LOC5565629	LOC120424232	LOC5565629|AAEL014913	Down	-0.961732	0.0312641	4.25014e-07
ISC/EB-prol	LOC5578121	LOC120416855	LOC5578121|AAEL003431	Down	-0.962433	0.0697676	2.72949e-05
ISC/EB-prol	LOC5569448	LOC120426050	LOC5569448|AAEL001244	Down	-0.963563	0.0875577	0.00068496
ISC/EB-prol	LOC5576245	LOC120425394	LOC5576245|AAEL002848	Down	-0.969547	0.044993	6.31934e-07
ISC/EB-prol	LOC5567660	LOC120417923	LOC5567660|AAEL012740	Down	-0.974003	0.0138304	1.95829e-05
ISC/EB-prol	LOC5565774	LOC120422963	LOC5565774|AAEL004988	Down	-0.982986	0.0728549	3.60259e-10
ISC/EB-prol	LOC5567167	LOC120422106	LOC5567167|AAEL005897	Down	-0.983683	0.0769528	6.50081e-06
ISC/EB-prol	LOC5579263	LOC120412604	LOC5579263|AAEL011873	Down	-0.983891	0.0503726	4.15462e-09
ISC/EB-prol	LOC5564319	LOC120420635	LOC5564319|AAEL000574	Down	-0.986871	0.0654335	1.78258e-05
ISC/EB-prol	LOC5564039	LOC120430120	LOC5564039|AAEL004065	Down	-0.988107	0.0645428	2.30508e-05
ISC/EB-prol	LOC5568558	LOC120426561	LOC5568558|AAEL001134	Down	-0.990861	0.077389	9.87931e-06
ISC/EB-prol	LOC5564492	LOC120413135	LOC5564492|AAEL004294	Down	-0.992427	0.0643691	4.71099e-06
ISC/EB-prol	LOC5576642	LOC120427768	LOC5576642|AAEL012671	Down	-0.993563	0.0237911	1.10785e-10
ISC/EB-prol	LOC5567100	LOC120412889	LOC5567100|AAEL005830	Down	-1.00128	0.0689566	0.000349983
ISC/EB-prol	LOC5574980	LOC120431230	LOC5574980|AAEL002508	Down	-1.01583	0.0762951	7.52205e-07
ISC/EB-prol	LOC5576003	LOC120431381	LOC5576003|AAEL025078	Down	-1.01697	0.0897329	5.69476e-05
ISC/EB-prol	LOC5570237	LOC120414305	LOC5570237|AAEL008171	Down	-1.01797	0.0719173	1.40014e-06
ISC/EB-prol	LOC5564379	LOC120428015	LOC5564379|AAEL014414	Down	-1.02027	0.080388	9.77043e-06
ISC/EB-prol	LOC5564403	LOC120414508	LOC5564403|AAEL004236	Down	-1.02028	0.0933036	8.09347e-06
ISC/EB-prol	LOC5571429	LOC120413618	LOC5571429|AAEL009066	Down	-1.02367	0.0480153	0.00012458
ISC/EB-prol	LOC5569847	LOC120422440	LOC5569847|AAEL007962	Down	-1.02583	0.0673975	5.02452e-06
ISC/EB-prol	LOC5578082	LOC120427642	LOC5578082|AAEL003423	Down	-1.02607	0.0416656	5.06051e-07
ISC/EB-prol	LOC5573204	LOC120427063	LOC5573204|AAEL001965	Down	-1.03169	0.116375	1.60681e-05
ISC/EB-prol	LOC5573115	LOC120427862	LOC5573115|AAEL001992	Down	-1.03305	0.0881257	3.05209e-06
ISC/EB-prol	LOC5575101	LOC120427014	LOC5575101|AAEL011663	Down	-1.0333	0.0839715	5.30151e-06
ISC/EB-prol	LOC5577035	LOC120419446	LOC5577035|AAEL012943	Down	-1.03462	0.0803524	1.81435e-05
ISC/EB-prol	LOC5570348	LOC120417464	LOC5570348|AAEL001378	Down	-1.03522	0.0921788	0.00061712
ISC/EB-prol	LOC5576477	LOC120416238	LOC5576477|AAEL002887	Down	-1.03531	0.0451338	1.86436e-06
ISC/EB-prol	LOC5563880	LOC120420867	LOC5563880|AAEL014198	Down	-1.04266	0.0647631	1.53525e-06
ISC/EB-prol	LOC5567793	LOC120421810	LOC5567793|AAEL000138	Down	-1.05111	0.0531156	1.09774e-05
ISC/EB-prol	LOC5570455	LOC120425894	LOC5570455|AAEL008341	Down	-1.05645	0.0423444	3.1624e-07
ISC/EB-prol	LOC5568876	LOC120414116	LOC5568876|AAEL023521	Down	-1.06333	0.0785654	5.08574e-06
ISC/EB-prol	LOC5576151	LOC120432028	LOC5576151|AAEL012341	Down	-1.06465	0.0602594	7.67234e-06
ISC/EB-prol	LOC5573938	LOC120426888	LOC5573938|AAEL002198	Down	-1.06569	0.0778682	1.91569e-05
ISC/EB-prol	LOC5568195	LOC120412687	LOC5568195|AAEL006619	Down	-1.06777	0.0487236	1.55557e-06
ISC/EB-prol	LOC5577630	LOC120425646	LOC5577630|AAEL003234	Down	-1.06799	0.0279369	8.14069e-07
ISC/EB-prol	LOC5576353	LOC120427414	LOC5576353|AAEL002881	Down	-1.06846	0.0252774	5.12084e-08
ISC/EB-prol	LOC5574484	LOC120418969	LOC5574484|AAEL002401	Down	-1.06856	0.0565486	1.74419e-05
ISC/EB-prol	LOC5570204	LOC120414346	LOC5570204|AAEL008164	Down	-1.07009	0.0651256	2.42541e-06
ISC/EB-prol	LOC5573615	LOC120425296	LOC5573615|AAEL010611	Down	-1.0701	0.0393429	8.0292e-07
ISC/EB-prol	LOC5565869	LOC120418965	LOC5565869|AAEL015007	Down	-1.07047	0.0688241	9.44983e-06
ISC/EB-prol	LOC5574834	LOC120416313	LOC5574834|AAEL011433	Down	-1.07178	0.0803988	1.15363e-05
ISC/EB-prol	LOC5569595	LOC120424318	LOC5569595|AAEL001245	Down	-1.0747	0.0686914	1.61796e-05
ISC/EB-prol	LOC5573175	LOC120421176	LOC5573175|AAEL019559	Down	-1.07972	0.070482	3.96831e-06
ISC/EB-prol	LOC5570784	LOC120414464	LOC5570784|AAEL022646	Down	-1.08157	0.0907218	0.000571398
ISC/EB-prol	LOC5564581	LOC120426517	LOC5564581|AAEL004347	Down	-1.09583	0.0399801	1.25961e-06
ISC/EB-prol	LOC5573489	LOC120422094	LOC5573489|AAEL014505	Down	-1.10244	0.0526532	3.95773e-06
ISC/EB-prol	LOC5579328	LOC120417809	LOC5579328|AAEL023188	Down	-1.1043	0.0687858	0.000319061
ISC/EB-prol	LOC5575009	LOC120415955	LOC5575009|AAEL011568	Down	-1.1052	0.0941642	1.92207e-05
ISC/EB-prol	LOC5569088	LOC120413785	LOC5569088|AAEL007363	Down	-1.10686	0.0829627	1.02729e-05
ISC/EB-prol	LOC5568668	LOC120423438	LOC5568668|AAEL007022	Down	-1.11222	0.06382	2.25524e-06
ISC/EB-prol	LOC5572167	LOC120418340	LOC5572167|AAEL023148	Down	-1.11442	0.0792761	1.61765e-05
ISC/EB-prol	LOC5574943	LOC120415132	LOC5574943|AAEL010453	Down	-1.11747	0.0716969	1.29662e-05
ISC/EB-prol	LOC5568717	LOC120415122	LOC5568717|AAEL007043	Down	-1.11775	0.063227	1.40528e-07
ISC/EB-prol	LOC23687533	LOC120427005	LOC23687533|AAEL017113	Down	-1.11859	0.078726	6.46722e-06
ISC/EB-prol	LOC110675318	LOC120421456	LOC110675318|-	Down	-1.11897	0.0548822	2.55824e-06
ISC/EB-prol	LOC5564301	LOC120419990	LOC5564301|AAEL018336	Down	-1.11903	0.0863394	0.000461728
ISC/EB-prol	LOC5572696	LOC120420687	LOC5572696|AAEL009964	Down	-1.13676	0.0237125	1.10473e-07
ISC/EB-prol	LOC5570176	LOC120422956	LOC5570176|AAEL024563	Down	-1.139	0.0835884	1.84006e-06
ISC/EB-prol	LOC5573218	LOC120428247	LOC5573218|AAEL019713	Down	-1.13916	0.0866866	5.57175e-06
ISC/EB-prol	LOC5580055	LOC120414539	LOC5580055|AAEL022806	Down	-1.14002	0.0662505	6.60193e-06
ISC/EB-prol	LOC5567421	LOC120417203	LOC5567421|AAEL006087	Down	-1.14023	0.0945026	0.000107372
ISC/EB-prol	LOC5564957	LOC120412926	LOC5564957|AAEL021728	Down	-1.14136	0.0930385	0.000463987
ISC/EB-prol	LOC5569074	LOC120413874	LOC5569074|AAEL001210	Down	-1.14451	0.049325	0.000123515
ISC/EB-prol	LOC110676224	LOC120424977	LOC110676224|AAEL020597	Down	-1.1476	0.0778736	2.16667e-05
ISC/EB-prol	LOC5575645	LOC120423824	LOC5575645|AAEL011979	Down	-1.15219	0.0688859	1.09225e-06
ISC/EB-prol	LOC5578794	LOC120421720	LOC5578794|AAEL003664	Down	-1.15392	0.0536185	4.93567e-06
ISC/EB-prol	LOC5577483	LOC120414889	LOC5577483|AAEL013236	Down	-1.15621	0.0665155	5.40775e-06
ISC/EB-prol	LOC5568881	LOC120414135	LOC5568881|AAEL007173	Down	-1.15636	0.0537577	1.52422e-06
ISC/EB-prol	LOC110674263	LOC120431936	LOC110674263|AAEL023991	Down	-1.16245	0.0617188	6.43956e-07
ISC/EB-prol	LOC5580156	LOC120417918	LOC5580156|AAEL025606	Down	-1.16373	0.086195	4.10587e-06
ISC/EB-prol	LOC5575135	LOC120420648	LOC5575135|AAEL000330	Down	-1.16617	0.0658816	1.24751e-06
ISC/EB-prol	LOC5572323	LOC120417888	LOC5572323|AAEL009706	Down	-1.16999	0.0855055	1.74609e-07
ISC/EB-prol	LOC5576221	LOC120416759	LOC5576221|AAEL002833	Down	-1.17144	0.0364018	5.7888e-07
ISC/EB-prol	LOC5566123	LOC120428064	LOC5566123|AAEL005187	Down	-1.17257	0.0751502	0.000301536
ISC/EB-prol	LOC5573060	LOC120414900	LOC5573060|AAEL010244	Down	-1.17289	0.0478327	0.000132761
ISC/EB-prol	LOC5577591	LOC120425374	LOC5577591|AAEL020476	Down	-1.18285	0.0426874	8.56019e-08
ISC/EB-prol	LOC23687710	LOC120422806	LOC23687710|AAEL017290	Down	-1.18587	0.0366135	5.45156e-07
ISC/EB-prol	LOC5569043	LOC120423139	LOC5569043|AAEL007329	Down	-1.18789	0.087073	8.02552e-05
ISC/EB-prol	LOC5567835	LOC120427252	LOC5567835|AAEL000983	Down	-1.18928	0.0894197	1.78469e-05
ISC/EB-prol	LOC5569521	LOC120419077	LOC5569521|AAEL007698	Down	-1.19233	0.0912555	3.79284e-06
ISC/EB-prol	LOC5571143	LOC120414667	LOC5571143|AAEL008853	Down	-1.19852	0.0664314	0.00025754
ISC/EB-prol	LOC5580166	LOC120420716	LOC5580166|AAEL002542	Down	-1.19855	0.0552066	2.72862e-06
ISC/EB-prol	LOC5579797	LOC120418431	LOC5579797|AAEL003972	Down	-1.20066	0.071397	2.68542e-06
ISC/EB-prol	LOC5578343	LOC128092953	LOC5578343|AAEL003514	Down	-1.20156	0.0738487	4.81485e-06
ISC/EB-prol	LOC5565085	LOC120424175	LOC5565085|AAEL023069	Down	-1.2026	0.0821494	1.19849e-05
ISC/EB-prol	LOC5565405	LOC120413220	LOC5565405|AAEL014843	Down	-1.20605	0.0365773	1.7505e-07
ISC/EB-prol	LOC5579044	LOC120420848	LOC5579044|AAEL013982	Down	-1.20679	0.0599484	7.04734e-06
ISC/EB-prol	LOC5564130	LOC120428924	LOC5564130|AAEL004102	Down	-1.207	0.0905993	2.47985e-05
ISC/EB-prol	LOC5575353	LOC120415224	LOC5575353|AAEL002583	Down	-1.21783	0.0885166	1.75702e-05
ISC/EB-prol	LOC5564544	LOC120426263	LOC5564544|AAEL004319	Down	-1.2242	0.0568131	1.39833e-05
ISC/EB-prol	LOC5575837	LOC120415043	LOC5575837|AAEL012094	Down	-1.22679	0.0481659	0.00012203
ISC/EB-prol	LOC5577094	LOC120416731	LOC5577094|AAEL012996	Down	-1.23117	0.051909	1.11049e-06
ISC/EB-prol	LOC5568488	LOC120427353	LOC5568488|AAEL006899	Down	-1.23304	0.0796113	1.86917e-06
ISC/EB-prol	LOC5567996	LOC120414574	LOC5567996|AAEL006441	Down	-1.23534	0.0749999	0.000233424
ISC/EB-prol	LOC5565400	LOC120424903	LOC5565400|AAEL004783	Down	-1.23544	0.0263339	1.11723e-06
ISC/EB-prol	LOC5575162	LOC120413506	LOC5575162|AAEL000328	Down	-1.2356	0.0656966	1.36747e-05
ISC/EB-prol	LOC5568387	LOC120422170	LOC5568387|AAEL006771	Down	-1.25001	0.0662148	0.000227389
ISC/EB-prol	LOC5574525	LOC120421080	LOC5574525|AAEL011202	Down	-1.25828	0.0863354	1.93503e-05
ISC/EB-prol	LOC5573956	LOC120423117	LOC5573956|AAEL002207	Down	-1.26151	0.0984163	4.96305e-05
ISC/EB-prol	LOC5576532	LOC120428729	LOC5576532|AAEL012579	Down	-1.26721	0.0696701	7.71824e-08
ISC/EB-prol	LOC5570801	LOC120428492	LOC5570801|AAEL008575	Down	-1.27268	0.0871834	4.62279e-06
ISC/EB-prol	LOC5573411	LOC120420212	LOC5573411|AAEL002048	Down	-1.27477	0.0907258	2.14451e-05
ISC/EB-prol	LOC5568998	LOC120432573	LOC5568998|AAEL025594	Down	-1.28056	0.0844188	1.66349e-05
ISC/EB-prol	LOC5579021	LOC120432387	LOC5579021|AAEL013960	Down	-1.2815	0.0540328	0.000195335
ISC/EB-prol	LOC110680525	LOC120429238	LOC110680525|AAEL011755	Down	-1.28815	0.0956548	1.47256e-05
ISC/EB-prol	LOC5579168	LOC120414606	LOC5579168|AAEL003871	Down	-1.28846	0.0694451	0.000229945
ISC/EB-prol	LOC5565279	LOC120420052	LOC5565279|AAEL014799	Down	-1.2925	0.0748668	2.41635e-05
ISC/EB-prol	LOC5570550	LOC120413665	LOC5570550|AAEL008363	Down	-1.29462	0.0712101	5.28076e-06
ISC/EB-prol	LOC5568081	LOC120417288	LOC5568081|AAEL006516	Down	-1.29896	0.0728238	4.66101e-06
ISC/EB-prol	LOC5577180	LOC120429990	LOC5577180|AAEL013052	Down	-1.30099	0.0561376	8.41093e-06
ISC/EB-prol	LOC5578975	LOC120421328	LOC5578975|AAEL024153	Down	-1.31609	0.0758794	4.88302e-06
ISC/EB-prol	LOC23687901	LOC120425410	LOC23687901|AAEL017481	Down	-1.31676	0.0212535	2.62054e-08
[truncated: 7,734 more rows]

## Sheet: aae_vs_cxtri
Cluster	Ae. aegypti	Cx. tritaeniorhynchus (Ctrl)	NCBI|VectorBase ID of Ae. aegypti orthologs	Regulation	de_coef	de_se	de_pval
ISC/EB-1	LOC5576966	Ctri05019	LOC5576966|AAEL003060	Up	3.95255	0.118384	1.03862e-05
ISC/EB-1	LOC23687839	Ctri04726	LOC23687839|AAEL017419	Up	3.36238	0.218721	5.81369e-05
ISC/EB-1	LOC5573872	Ctri02142	LOC5573872|AAEL010787	Up	3.17253	0.114294	1.05479e-05
ISC/EB-1	LOC5573418	Ctri09726	LOC5573418|AAEL002083	Up	2.92523	0.179059	1.44936e-05
ISC/EB-1	LOC5578793	Ctri05126	LOC5578793|AAEL003676	Up	2.5139	0.229086	0.000211667
ISC/EB-1	LOC5577566	Ctri04873	LOC5577566|AAEL013272	Up	2.46641	0.0558819	2.14042e-07
ISC/EB-1	LOC5577042	Ctri00428	LOC5577042|AAEL012964	Up	2.2277	0.120349	8.43804e-07
ISC/EB-1	LOC5579654	Ctri06350	LOC5579654|AAEL003970	Up	2.1184	0.30233	0.000506097
ISC/EB-1	LOC5572753	Ctri09582	LOC5572753|AAEL010018	Up	2.1052	0.175965	0.000108157
ISC/EB-1	LOC110676045	Ctri09594	LOC110676045|AAEL022286	Up	2.05107	0.0367206	4.53147e-08
ISC/EB-1	LOC5571208	Ctri07768	LOC5571208|AAEL008893	Up	1.79325	0.251289	0.000397625
ISC/EB-1	LOC5570020	Ctri06155	LOC5570020|AAEL000182	Up	1.75995	0.235604	7.57665e-05
ISC/EB-1	LOC5570114	Ctri00533	LOC5570114|AAEL008079	Up	1.75127	0.258395	8.03606e-05
ISC/EB-1	LOC5565400	Ctri05425	LOC5565400|AAEL004783	Up	1.75082	0.15524	5.03904e-05
ISC/EB-1	LOC5564056	Ctri01704	LOC5564056|AAEL004059	Up	1.73173	0.110441	5.82544e-06
ISC/EB-1	LOC5566457	Ctri02415	LOC5566457|AAEL005428	Up	1.6882	0.247571	0.000298713
ISC/EB-1	LOC5567341	Ctri03464	LOC5567341|AAEL006011	Up	1.65434	0.0975245	9.78263e-07
ISC/EB-1	LOC5565624	Ctri09827	LOC5565624|AAEL014292	Up	1.65197	0.0411142	1.83294e-06
ISC/EB-1	LOC5571997	Ctri00907	LOC5571997|AAEL009487	Up	1.64431	0.180557	0.000109758
ISC/EB-1	LOC5574109	Ctri10477	LOC5574109|AAEL002263	Up	1.63526	0.190823	5.10908e-05
ISC/EB-1	LOC5566864	Ctri07116	LOC5566864|AAEL000847	Up	1.63335	0.248245	0.000207318
ISC/EB-1	LOC5576348	Ctri03227	LOC5576348|AAEL002861	Up	1.62873	0.17742	0.000128824
ISC/EB-1	LOC5571685	Ctri08885	LOC5571685|AAEL009214	Up	1.61474	0.178021	0.000165535
ISC/EB-1	LOC5569026	Ctri01328	LOC5569026|AAEL007322	Up	1.60757	0.254609	0.000471553
ISC/EB-1	LOC5570461	Ctri09139	LOC5570461|AAEL008356	Up	1.60252	0.206358	0.000241992
ISC/EB-1	LOC5568465	Ctri02586	LOC5568465|AAEL006860	Up	1.58262	0.0428451	5.74362e-08
ISC/EB-1	LOC5574458	Ctri10160	LOC5574458|AAEL011180	Up	1.57192	0.0933845	2.39951e-06
ISC/EB-1	LOC5566977	Ctri04171	LOC5566977|AAEL005739	Up	1.55015	0.192198	0.000166484
ISC/EB-1	LOC5578684	Ctri03201	LOC5578684|AAEL003645	Up	1.54893	0.129087	2.92387e-06
ISC/EB-1	LOC5570932	Ctri05954	LOC5570932|AAEL008671	Up	1.49359	0.238433	0.000328868
ISC/EB-1	LOC5569925	Ctri00695	LOC5569925|AAEL027654	Up	1.48129	0.34472	0.00220789
ISC/EB-1	LOC5572224	Ctri06933	LOC5572224|AAEL009658	Up	1.47256	0.260068	0.000463519
ISC/EB-1	LOC5573878	Ctri11137	LOC5573878|AAEL010799	Up	1.46496	0.307268	0.00117747
ISC/EB-1	LOC5578686	Ctri03202	LOC5578686|AAEL003634	Up	1.46068	0.242655	0.000402655
ISC/EB-1	LOC5579926	Ctri07246	LOC5579926|AAEL006795	Up	1.43797	0.230253	0.000598785
ISC/EB-1	LOC5577178	Ctri07083	LOC5577178|AAEL013047	Up	1.41643	0.271069	0.000821816
ISC/EB-1	LOC5564921	Ctri03647	LOC5564921|AAEL004500	Up	1.40829	0.0530539	2.99999e-07
ISC/EB-1	LOC5573374	Ctri02310	LOC5573374|AAEL010464	Up	1.39491	0.162501	8.98992e-05
ISC/EB-1	LOC5573858	Ctri05759	LOC5573858|AAEL010782	Up	1.37531	0.238396	0.00033807
ISC/EB-1	LOC5571785	Ctri02548	LOC5571785|AAEL009313	Up	1.37484	0.0808825	1.2994e-05
ISC/EB-1	LOC5567769	Ctri03063	LOC5567769|AAEL000102	Up	1.37153	0.172813	0.000241253
ISC/EB-1	LOC5569309	Ctri05634	LOC5569309|AAEL007556	Up	1.36358	0.25309	0.00115617
ISC/EB-1	LOC5572983	Ctri10510	LOC5572983|AAEL001919	Up	1.35943	0.249251	0.000563023
ISC/EB-1	LOC5570050	Ctri06175	LOC5570050|AAEL000185	Up	1.35794	0.149502	3.50335e-05
ISC/EB-1	LOC5574665	Ctri11215	LOC5574665|AAEL011309	Up	1.35256	0.146193	0.000203703
ISC/EB-1	LOC5571571	Ctri00960	LOC5571571|AAEL009160	Up	1.32917	0.147256	0.000116355
ISC/EB-1	LOC5566976	Ctri04172	LOC5566976|AAEL005744	Up	1.31327	0.148548	0.000133413
ISC/EB-1	LOC5567396	Ctri11818	LOC5567396|AAEL006053	Up	1.28276	0.160042	0.000227656
ISC/EB-1	LOC5565804	Ctri07426	LOC5565804|AAEL005008	Up	1.27585	0.286795	0.00145209
ISC/EB-1	LOC5570214	Ctri12698	LOC5570214|AAEL008154	Up	1.26598	0.238988	0.000640505
ISC/EB-1	LOC5578900	Ctri09731	LOC5578900|AAEL013904	Up	1.22809	0.175677	9.40534e-05
ISC/EB-1	LOC5579187	Ctri12048	LOC5579187|AAEL003873	Up	1.21606	0.264058	0.00154393
ISC/EB-1	LOC5569181	Ctri05456	LOC5569181|AAEL007441	Up	1.20296	0.164179	0.000145827
ISC/EB-1	LOC5576835	Ctri11834	LOC5576835|AAEL012819	Up	1.17973	0.216781	0.000512271
ISC/EB-1	LOC110678983	Ctri11382	LOC110678983|AAEL025807	Up	1.17504	0.265031	0.00168035
ISC/EB-1	LOC5564925	Ctri03652	LOC5564925|AAEL019568	Up	1.13626	0.0599433	0.000244131
ISC/EB-1	LOC5577777	Ctri07301	LOC5577777|AAEL003285	Up	1.13543	0.194331	0.000260284
ISC/EB-1	LOC5577139	Ctri09644	LOC5577139|AAEL003125	Up	1.118	0.277865	0.00236794
ISC/EB-1	LOC5570921	Ctri05646	LOC5570921|AAEL001495	Up	1.10404	0.237724	0.000998605
ISC/EB-1	LOC5572735	Ctri02357	LOC5572735|AAEL010012	Up	1.08265	0.131089	1.07605e-05
ISC/EB-1	LOC5572119	Ctri06533	LOC5572119|AAEL009539	Up	1.08117	0.233212	0.0010526
ISC/EB-1	LOC5578734	Ctri11911	LOC5578734|AAEL003661	Up	1.07687	0.168476	0.000254911
ISC/EB-1	LOC5578458	Ctri11092	LOC5578458|AAEL000523	Up	1.07683	0.271565	0.0020548
ISC/EB-1	LOC5564487	Ctri05544	LOC5564487|AAEL004288	Up	1.07087	0.222194	0.0013436
ISC/EB-1	LOC5564781	Ctri06093	LOC5564781|AAEL004419	Up	1.07049	0.175747	0.000238844
ISC/EB-1	LOC5568600	Ctri08381	LOC5568600|AAEL001102	Up	1.0556	0.186957	0.000422307
ISC/EB-1	LOC5579796	Ctri06937	LOC5579796|AAEL003976	Up	1.04341	0.166558	8.24229e-05
ISC/EB-1	LOC110676232	Ctri10122	LOC110676232|AAEL023983	Up	1.04094	0.0323686	2.97815e-07
ISC/EB-1	LOC5576124	Ctri02901	LOC5576124|AAEL002811	Up	1.0372	0.211654	0.000750801
ISC/EB-1	LOC5575696	Ctri07479	LOC5575696|AAEL012010	Up	1.03306	0.159406	0.000198255
ISC/EB-1	LOC5567789	Ctri03039	LOC5567789|AAEL000147	Up	1.02846	0.269924	0.00203974
ISC/EB-1	LOC5574966	Ctri00647	LOC5574966|AAEL002527	Up	1.00622	0.109162	3.75845e-05
ISC/EB-1	LOC110679583	Ctri07118	LOC110679583|AAEL023591	Up	0.994107	0.158308	0.000114832
ISC/EB-1	LOC5567637	Ctri08889	LOC5567637|AAEL006224	Up	0.9897	0.222636	0.00106804
ISC/EB-1	LOC5568090	Ctri03547	LOC5568090|AAEL006511	Up	0.989039	0.0300397	3.11772e-08
ISC/EB-1	LOC110679171	Ctri06132	LOC110679171|AAEL009684	Up	0.985104	0.210349	0.00087449
ISC/EB-1	LOC5571281	Ctri08900	LOC5571281|AAEL001583	Up	0.982016	0.287322	0.00319936
ISC/EB-1	LOC5575753	Ctri08641	LOC5575753|AAEL002723	Up	0.976038	0.257452	0.00158224
ISC/EB-1	LOC5573813	Ctri04223	LOC5573813|AAEL010731	Up	0.965779	0.289558	0.00339932
ISC/EB-1	LOC5572532	Ctri09900	LOC5572532|AAEL009863	Up	0.961697	0.248694	0.0016375
ISC/EB-1	LOC5569049	Ctri04748	LOC5569049|AAEL007342	Up	0.923186	0.120012	5.41398e-05
ISC/EB-1	LOC5572923	Ctri05308	LOC5572923|AAEL010146	Up	0.921558	0.203787	0.000842651
ISC/EB-1	LOC5569222	Ctri02942	LOC5569222|AAEL007494	Up	0.917242	0.185249	0.000617128
ISC/EB-1	LOC5576740	Ctri02626	LOC5576740|AAEL025250	Up	0.906663	0.232301	0.00135535
ISC/EB-1	LOC5573292	Ctri10177	LOC5573292|AAEL010371	Up	0.905786	0.265198	0.00280702
ISC/EB-1	LOC5573370	Ctri02312	LOC5573370|AAEL010470	Up	0.868645	0.198683	0.000776442
ISC/EB-1	LOC5567419	Ctri03329	LOC5567419|AAEL006066	Up	0.867272	0.268566	0.00479904
ISC/EB-1	LOC5578146	Ctri10485	LOC5578146|AAEL013527	Up	0.860956	0.149177	0.000227457
ISC/EB-1	LOC5563646	Ctri11632	LOC5563646|AAEL021083	Up	0.848919	0.0266313	1.33211e-07
ISC/EB-1	LOC5567433	Ctri07675	LOC5567433|AAEL006098	Up	0.840436	0.245779	0.00279944
ISC/EB-1	LOC5564399	Ctri01129	LOC5564399|AAEL004227	Up	0.839027	0.24334	0.00357746
ISC/EB-1	LOC5574612	Ctri03081	LOC5574612|AAEL011255	Up	0.830265	0.129499	4.42971e-05
ISC/EB-1	LOC5570648	Ctri00029	LOC5570648|AAEL008468	Up	0.822431	0.168699	0.000302505
ISC/EB-1	LOC5565108	Ctri10448	LOC5565108|AAEL004586	Up	0.812356	0.147507	0.000619375
ISC/EB-1	LOC5569745	Ctri08224	LOC5569745|AAEL007883	Up	0.811818	0.0963827	6.44242e-05
ISC/EB-1	LOC5567207	Ctri07345	LOC5567207|AAEL000902	Up	0.803931	0.232824	0.00283631
ISC/EB-1	LOC5579183	Ctri12052	LOC5579183|AAEL003901	Up	0.789625	0.218131	0.00242343
ISC/EB-1	LOC5572672	Ctri05082	LOC5572672|AAEL001852	Up	0.778942	0.101087	0.000105072
ISC/EB-1	LOC5578053	Ctri08664	LOC5578053|AAEL013490	Up	0.768809	0.274791	0.009998
ISC/EB-1	LOC5572195	Ctri10647	LOC5572195|AAEL014715	Up	0.764536	0.102603	0.000936806
ISC/EB-1	LOC5575037	Ctri07378	LOC5575037|AAEL011587	Up	0.75149	0.0329288	4.7684e-06
ISC/EB-1	LOC5569604	Ctri10030	LOC5569604|AAEL001275	Up	0.74189	0.173281	0.000891226
ISC/EB-1	LOC5566751	Ctri01506	LOC5566751|AAEL015238	Up	0.737028	0.15213	0.0005713
ISC/EB-1	LOC5564874	Ctri06143	LOC5564874|AAEL004460	Up	0.73394	0.142389	0.000592407
ISC/EB-1	LOC5565605	Ctri02908	LOC5565605|AAEL023022	Up	0.731643	0.20088	0.00253916
ISC/EB-1	LOC5568633	Ctri05926	LOC5568633|AAEL007023	Up	0.725684	0.141718	0.000279705
ISC/EB-1	LOC5571779	Ctri08846	LOC5571779|AAEL009295	Up	0.713869	0.279092	0.0171966
ISC/EB-1	LOC5573217	Ctri08409	LOC5573217|AAEL010299	Up	0.711589	0.0282779	7.42429e-06
ISC/EB-1	LOC23687495	Ctri10124	LOC23687495|AAEL017075	Up	0.702884	0.0655229	7.43822e-06
ISC/EB-1	LOC5568319	Ctri09026	LOC5568319|AAEL006727	Up	0.69562	0.240405	0.00759848
ISC/EB-1	LOC23687815	Ctri06892	LOC23687815|AAEL017395	Up	0.687873	0.160064	0.000771223
ISC/EB-1	LOC5572284	Ctri10286	LOC5572284|AAEL001759	Up	0.681346	0.0289327	2.81846e-06
ISC/EB-1	LOC5570228	Ctri12709	LOC5570228|AAEL008185	Up	0.677913	0.22883	0.00579884
ISC/EB-1	LOC5567528	Ctri12087	LOC5567528|AAEL006129	Up	0.677556	0.192768	0.00254101
ISC/EB-1	LOC5568498	Ctri11250	LOC5568498|AAEL006912	Up	0.655344	0.227935	0.00559888
ISC/EB-1	LOC5569338	Ctri05624	LOC5569338|AAEL007546	Up	0.654681	0.114371	0.000371142
ISC/EB-1	LOC5566220	Ctri09020	LOC5566220|AAEL005270	Up	0.649658	0.101957	6.44616e-05
ISC/EB-1	LOC5571564	Ctri00512	LOC5571564|AAEL009151	Up	0.643775	0.0286594	4.18691e-07
ISC/EB-1	LOC5577284	Ctri07695	LOC5577284|AAEL013138	Up	0.64035	0.313854	0.0469906
ISC/EB-1	LOC5575533	Ctri07855	LOC5575533|AAEL011912	Up	0.636982	0.283704	0.0275945
ISC/EB-1	LOC5580214	Ctri08155	LOC5580214|AAEL011918	Up	0.633666	0.177035	0.00208017
ISC/EB-1	LOC5567950	Ctri06270	LOC5567950|AAEL006390	Up	0.626407	0.276871	0.0281944
ISC/EB-1	LOC5567848	Ctri08542	LOC5567848|AAEL000987	Up	0.625028	0.0275518	5.65931e-06
ISC/EB-1	LOC5571500	Ctri01690	LOC5571500|AAEL001623	Up	0.622354	0.0896757	7.1602e-05
ISC/EB-1	LOC5567494	Ctri07873	LOC5567494|AAEL000941	Up	0.619558	0.173269	0.00197521
ISC/EB-1	LOC5574566	Ctri10135	LOC5574566|AAEL011242	Up	0.618417	0.242463	0.0155969
ISC/EB-1	LOC5566237	Ctri09015	LOC5566237|AAEL005276	Up	0.61626	0.257252	0.020196
ISC/EB-1	LOC5568586	Ctri08394	LOC5568586|AAEL001101	Up	0.609306	0.18941	0.00259948
ISC/EB-1	LOC5569083	Ctri03589	LOC5569083|AAEL001209	Up	0.595959	0.288131	0.0423915
ISC/EB-1	LOC5568556	Ctri12746	LOC5568556|AAEL001126	Up	0.584672	0.188842	0.00322654
ISC/EB-1	LOC5574542	Ctri10522	LOC5574542|AAEL011216	Up	0.584438	0.194179	0.00319936
ISC/EB-1	LOC5579278	Ctri11780	LOC5579278|AAEL015631	Up	0.583738	0.268916	0.0333933
ISC/EB-1	LOC5570591	Ctri01330	LOC5570591|AAEL008408	Up	0.573152	0.160148	0.00218915
ISC/EB-1	LOC5569529	Ctri03508	LOC5569529|AAEL007699	Up	0.569242	0.0294265	6.25369e-06
ISC/EB-1	LOC5565891	Ctri03564	LOC5565891|AAEL000706	Up	0.567226	0.129236	0.000796134
ISC/EB-1	LOC110681196	Ctri02546	LOC110681196|AAEL017135	Up	0.566208	0.259711	0.0283943
ISC/EB-1	LOC5573963	Ctri12181	LOC5573963|AAEL010826	Up	0.55844	0.0850794	0.000208773
ISC/EB-1	LOC110674148	Ctri02427	LOC110674148|nan	Up	0.555039	0.107075	0.000328316
ISC/EB-1	LOC5570363	Ctri06844	LOC5570363|AAEL008278	Up	0.534878	0.268096	0.0481904
ISC/EB-1	LOC5569212	Ctri08721	LOC5569212|AAEL019885	Up	0.529561	0.169062	0.00287797
ISC/EB-1	LOC5569936	Ctri00014	LOC5569936|AAEL008025	Up	0.529088	0.20449	0.0111978
ISC/EB-1	LOC5572968	Ctri11332	LOC5572968|AAEL010168	Up	0.51996	0.0316352	2.88555e-06
ISC/EB-1	LOC5564041	Ctri01715	LOC5564041|AAEL004042	Up	0.51944	0.164537	0.00261724
ISC/EB-1	LOC5567242	Ctri07319	LOC5567242|AAEL000883	Up	0.515781	0.210082	0.0157968
ISC/EB-1	LOC5580070	Ctri01107	LOC5580070|AAEL002160	Up	0.513362	0.10663	0.000473376
ISC/EB-1	LOC5565922	Ctri03562	LOC5565922|AAEL000709	Up	0.508714	0.208594	0.0169966
ISC/EB-1	LOC5572534	Ctri09904	LOC5572534|AAEL009859	Up	0.508309	0.0540801	7.54952e-06
ISC/EB-1	LOC5578378	Ctri00400	LOC5578378|AAEL013653	Up	0.507597	0.196172	0.00959808
ISC/EB-1	LOC5564787	Ctri06099	LOC5564787|AAEL004435	Up	0.503065	0.217436	0.0285943
ISC/EB-1	LOC5568436	Ctri08561	LOC5568436|AAEL012661	Up	0.495693	0.0757652	0.000179521
ISC/EB-1	LOC5565217	Ctri06819	LOC5565217|AAEL004669	Up	0.485539	0.189503	0.0161968
ISC/EB-1	LOC5565541	Ctri09323	LOC5565541|AAEL004829	Up	0.484711	0.107499	0.00033928
ISC/EB-1	LOC5564809	Ctri02016	LOC5564809|AAEL014630	Up	0.483996	0.22652	0.0339932
ISC/EB-1	LOC5574069	Ctri03214	LOC5574069|nan	Up	0.483444	0.201514	0.0177964
ISC/EB-1	LOC5570871	Ctri10202	LOC5570871|AAEL019868	Up	0.47424	0.189826	0.0181964
ISC/EB-1	LOC5572967	Ctri11331	LOC5572967|AAEL010159	Up	0.471183	0.146901	0.0021602
ISC/EB-1	LOC5568477	Ctri08814	LOC5568477|AAEL006883	Up	0.462723	0.207075	0.0281944
ISC/EB-1	LOC5571107	Ctri06461	LOC5571107|AAEL001526	Up	0.462271	0.231478	0.0477904
ISC/EB-1	LOC5578311	Ctri01494	LOC5578311|AAEL008084	Up	0.452855	0.157207	0.00279944
ISC/EB-1	LOC5564364	Ctri07824	LOC5564364|AAEL013783	Up	0.445994	0.211733	0.0325935
ISC/EB-1	LOC5564768	Ctri06101	LOC5564768|AAEL004434	Up	0.44106	0.0786995	0.000248044
ISC/EB-1	LOC5566143	Ctri08455	LOC5566143|AAEL005213	Up	0.429702	0.0978459	0.000336853
ISC/EB-1	LOC5572725	Ctri01917	LOC5572725|AAEL009994	Up	0.422639	0.0378089	2.24485e-06
ISC/EB-1	LOC5565083	Ctri02724	LOC5565083|AAEL014717	Up	0.41437	0.162103	0.0155969
ISC/EB-1	LOC5577591	Ctri02723	LOC5577591|AAEL020476	Up	0.408222	0.196782	0.0433913
ISC/EB-1	LOC5571930	Ctri07869	LOC5571930|AAEL009389	Up	0.407739	0.106668	0.000716076
ISC/EB-1	LOC5578293	Ctri10778	LOC5578293|AAEL022819	Up	0.38891	0.159665	0.0153969
ISC/EB-1	LOC5573751	Ctri06311	LOC5573751|AAEL000294	Up	0.378068	0.136227	0.0059988
ISC/EB-1	LOC5564392	Ctri01128	LOC5564392|AAEL004234	Up	0.368885	0.119772	0.00298657
ISC/EB-1	LOC5566959	Ctri00405	LOC5566959|AAEL005722	Up	0.366138	0.0292583	5.85839e-06
ISC/EB-1	LOC5564556	Ctri05713	LOC5564556|AAEL004325	Up	0.362281	0.0319126	8.81871e-06
ISC/EB-1	LOC5568784	Ctri11783	LOC5568784|AAEL007135	Up	0.357717	0.107808	0.00293994
ISC/EB-1	LOC5576353	Ctri03223	LOC5576353|AAEL002881	Up	0.356418	0.0932207	0.0014474
ISC/EB-1	LOC5579101	Ctri08040	LOC5579101|AAEL003842	Up	0.35482	0.157338	0.0259948
ISC/EB-1	LOC5568481	Ctri08812	LOC5568481|AAEL006879	Up	0.349495	0.165376	0.0419916
ISC/EB-1	LOC5574667	Ctri11216	LOC5574667|AAEL011302	Up	0.337407	0.0824197	0.000785309
ISC/EB-1	LOC5570233	Ctri12716	LOC5570233|AAEL008166	Up	0.325324	0.11329	0.00419916
ISC/EB-1	LOC23687501	Ctri00170	LOC23687501|AAEL017081	Up	0.324324	0.117591	0.00539892
ISC/EB-1	LOC5578243	Ctri05261	LOC5578243|AAEL015006	Up	0.314209	0.0267955	1.73059e-05
ISC/EB-1	LOC5579853	Ctri06202	LOC5579853|AAEL005845	Up	0.298227	0.138161	0.0377924
ISC/EB-1	LOC5574844	Ctri09091	LOC5574844|AAEL011447	Up	0.287422	0.0251174	1.24993e-05
ISC/EB-1	LOC5570505	Ctri09179	LOC5570505|AAEL001411	Up	0.287276	0.113312	0.0127974
ISC/EB-1	LOC5565770	Ctri04922	LOC5565770|AAEL004986	Up	0.277859	0.144212	0.04999
ISC/EB-1	LOC23687618	Ctri01711	LOC23687618|AAEL017198	Up	0.26486	0.0270421	2.68288e-05
ISC/EB-1	LOC5577489	Ctri06632	LOC5577489|AAEL013229	Up	0.238016	0.115576	0.0419916
ISC/EB-1	LOC5580030	Ctri00458	LOC5580030|AAEL009653	Up	0.204188	0.0298351	8.92333e-05
ISC/EB-1	LOC23687901	Ctri02159	LOC23687901|AAEL017481	Up	0.191758	0.0736507	0.0103979
ISC/EB-1	LOC110677919	Ctri07845	LOC110677919|AAEL020749	Up	0.170286	0.0291737	2.802e-05
ISC/EB-1	LOC5578625	Ctri00541	LOC5578625|AAEL003582	Up	0.167652	0.0286395	0.000120877
ISC/EB-1	LOC5569863	Ctri04992	LOC5569863|AAEL007945	Up	0.146886	0.058219	0.0129974
ISC/EB-1	LOC5573763	Ctri10361	LOC5573763|AAEL000269	Up	0.13794	0.0464107	0.00359928
ISC/EB-1	LOC5580329	Ctri05470	LOC5580329|AAEL013069	Up	0.13004	0.0351309	0.00121968
ISC/EB-1	LOC5565962	Ctri12002	LOC5565962|AAEL005220	Up	0.128258	0.0281749	0.000224806
ISC/EB-1	LOC5572365	Ctri06987	LOC5572365|AAEL009747	Up	0.121309	0.030043	0.000889682
ISC/EB-1	LOC5575105	Ctri12557	LOC5575105|AAEL011656	Up	0.1011	0.0293573	0.00189531
ISC/EB-1	LOC5566228	Ctri00360	LOC5566228|AAEL005266	Up	0.0916101	0.0258613	0.00131196
ISC/EB-1	LOC5570432	Ctri05078	LOC5570432|AAEL008329	Up	0.0846789	0.0284064	0.00279944
ISC/EB-1	LOC23687936	Ctri08704	LOC23687936|AAEL017516	Up	0.084619	0.0294923	0.00239952
ISC/EB-1	LOC5565979	Ctri12311	LOC5565979|AAEL005097	Down	-0.0628748	0.0295699	0.0345931
ISC/EB-1	LOC5570244	Ctri12440	LOC5570244|AAEL008188	Down	-0.0973854	0.0261789	0.000853319
ISC/EB-1	LOC5574515	Ctri12190	LOC5574515|AAEL019717	Down	-0.122036	0.0464422	0.00919816
ISC/EB-1	LOC5569531	Ctri06434	LOC5569531|AAEL007715	Down	-0.127007	0.0272003	0.000320581
ISC/EB-1	LOC5564212	Ctri09438	LOC5564212|AAEL004151	Down	-0.13049	0.0296315	0.00130352
ISC/EB-1	LOC5576896	Ctri01296	LOC5576896|AAEL003039	Down	-0.146095	0.0714139	0.0367926
ISC/EB-1	LOC5576758	Ctri01232	LOC5576758|AAEL025553	Down	-0.14732	0.0263754	2.18967e-05
ISC/EB-1	LOC5577996	Ctri12525	LOC5577996|AAEL003396	Down	-0.150352	0.0246238	0.000155479
ISC/EB-1	LOC5563786	Ctri12202	LOC5563786|AAEL003942	Down	-0.153228	0.0298691	0.000329134
ISC/EB-1	LOC5579186	Ctri12050	LOC5579186|AAEL003872	Down	-0.156961	0.0309854	0.000535788
ISC/EB-1	LOC5570675	Ctri08925	LOC5570675|AAEL008481	Down	-0.165531	0.0269578	0.00130009
ISC/EB-1	LOC5570243	Ctri12439	LOC5570243|AAEL008192	Down	-0.167403	0.0306522	0.000473419
ISC/EB-1	LOC5567070	Ctri02558	LOC5567070|AAEL005817	Down	-0.168602	0.025073	0.000117116
ISC/EB-1	LOC5576744	Ctri08866	LOC5576744|AAEL024536	Down	-0.175826	0.0247581	6.87845e-06
ISC/EB-1	LOC5574862	Ctri09881	LOC5574862|AAEL011468	Down	-0.18223	0.0948973	0.0479904
ISC/EB-1	LOC5563590	Ctri11760	LOC5563590|AAEL000032	Down	-0.183049	0.0292898	0.000193741
ISC/EB-1	LOC5571466	Ctri11410	LOC5571466|AAEL009101	Down	-0.185825	0.0721488	0.00959808
ISC/EB-1	LOC5576244	Ctri06274	LOC5576244|AAEL002851	Down	-0.189392	0.0709525	0.00879824
ISC/EB-1	LOC5573827	Ctri06684	LOC5573827|AAEL010756	Down	-0.196055	0.0269639	9.20886e-05
ISC/EB-1	LOC5577568	Ctri09546	LOC5577568|AAEL013279	Down	-0.204465	0.0832582	0.0153969
ISC/EB-1	LOC5571461	Ctri11408	LOC5571461|AAEL009092	Down	-0.20579	0.106681	0.0437912
ISC/EB-1	LOC5572090	Ctri08065	LOC5572090|AAEL009496	Down	-0.213972	0.0296997	3.93786e-05
ISC/EB-1	LOC5578459	Ctri11093	LOC5578459|AAEL000486	Down	-0.219615	0.084462	0.00959808
ISC/EB-1	LOC5578927	Ctri01922	LOC5578927|AAEL003750	Down	-0.224854	0.0490326	0.000778521
ISC/EB-1	LOC5577034	Ctri06081	LOC5577034|AAEL012944	Down	-0.22862	0.0272739	0.000531222
ISC/EB-1	LOC5565544	Ctri09488	LOC5565544|AAEL004855	Down	-0.232052	0.031413	7.16847e-06
ISC/EB-1	LOC5574866	Ctri11246	LOC5574866|AAEL011471	Down	-0.234033	0.0257161	2.21185e-05
ISC/EB-1	LOC5573211	Ctri08420	LOC5573211|AAEL010318	Down	-0.234186	0.0407535	0.000128754
ISC/EB-1	LOC5566843	Ctri11552	LOC5566843|AAEL000823	Down	-0.237543	0.0263699	5.41175e-05
ISC/EB-1	LOC5566772	Ctri00040	LOC5566772|AAEL005629	Down	-0.240086	0.0239296	3.28836e-05
ISC/EB-1	LOC5564133	Ctri08331	LOC5564133|AAEL004088	Down	-0.245926	0.0925239	0.0089982
ISC/EB-1	LOC5572843	Ctri12660	LOC5572843|AAEL010059	Down	-0.250962	0.083358	0.00319936
ISC/EB-1	LOC5580192	Ctri03235	LOC5580192|AAEL002551	Down	-0.256087	0.12825	0.0429914
ISC/EB-1	LOC110679353	Ctri06700	LOC110679353|AAEL025697	Down	-0.258415	0.10232	0.0103979
ISC/EB-1	LOC5572383	Ctri01550	LOC5572383|AAEL009772	Down	-0.261696	0.125667	0.0321936
ISC/EB-1	LOC5564019	Ctri04246	LOC5564019|AAEL019487	Down	-0.269441	0.102573	0.00879824
ISC/EB-1	LOC5569582	Ctri09888	LOC5569582|AAEL007771	Down	-0.272377	0.0271	3.39005e-05
ISC/EB-1	LOC5564477	Ctri05599	LOC5564477|AAEL014484	Down	-0.282959	0.117526	0.014797
ISC/EB-1	LOC5573413	Ctri00605	LOC5573413|AAEL002047	Down	-0.284566	0.0256878	9.73346e-06
ISC/EB-1	LOC5574739	Ctri05292	LOC5574739|AAEL011369	Down	-0.284581	0.13684	0.0373925
ISC/EB-1	LOC5568292	Ctri10335	LOC5568292|AAEL006721	Down	-0.285696	0.119475	0.0191962
ISC/EB-1	LOC5576079	Ctri09793	LOC5576079|AAEL012317	Down	-0.286982	0.139683	0.0443911
ISC/EB-1	LOC5569670	Ctri01796	LOC5569670|AAEL007824	Down	-0.293218	0.0296371	1.49578e-05
ISC/EB-1	LOC5580259	Ctri05618	LOC5580259|AAEL012585	Down	-0.295047	0.0285844	4.9682e-05
ISC/EB-1	LOC5564516	Ctri05208	LOC5564516|AAEL004284	Down	-0.296658	0.102554	0.00379924
ISC/EB-1	LOC110675493	Ctri09137	LOC110675493|AAEL028043	Down	-0.305027	0.0260343	8.70073e-06
ISC/EB-1	LOC5575995	Ctri11270	LOC5575995|AAEL002761	Down	-0.30577	0.121421	0.0127974
ISC/EB-1	LOC5570318	Ctri12677	LOC5570318|AAEL008257	Down	-0.307508	0.0947729	0.00262246
ISC/EB-1	LOC5567342	Ctri03463	LOC5567342|AAEL006006	Down	-0.307754	0.109118	0.00579884
ISC/EB-1	LOC5563589	Ctri11762	LOC5563589|AAEL000090	Down	-0.313691	0.134541	0.0219956
ISC/EB-1	LOC5574634	Ctri04749	LOC5574634|AAEL020739	Down	-0.322223	0.110432	0.00559888
ISC/EB-1	LOC5566800	Ctri04781	LOC5566800|AAEL005651	Down	-0.328791	0.0955809	0.00134865
ISC/EB-1	LOC5575715	Ctri11289	LOC5575715|AAEL012026	Down	-0.338549	0.069065	0.000316215
ISC/EB-1	LOC5575681	Ctri05055	LOC5575681|AAEL011992	Down	-0.340186	0.118789	0.00539892
ISC/EB-1	LOC5577250	Ctri01646	LOC5577250|AAEL027982	Down	-0.341336	0.154849	0.0253949
ISC/EB-1	LOC5573830	Ctri06565	LOC5573830|AAEL010754	Down	-0.346413	0.057938	6.69531e-05
ISC/EB-1	LOC5569898	Ctri10406	LOC5569898|AAEL008002	Down	-0.349043	0.136946	0.0131974
ISC/EB-1	LOC5564769	Ctri06092	LOC5564769|AAEL004438	Down	-0.355054	0.147362	0.0185963
ISC/EB-1	LOC5570139	Ctri12633	LOC5570139|AAEL008103	Down	-0.359711	0.0248487	8.99352e-06
ISC/EB-1	LOC5574338	Ctri10575	LOC5574338|AAEL002334	Down	-0.362231	0.0688796	8.94768e-05
ISC/EB-1	LOC5578796	Ctri05122	LOC5578796|AAEL003675	Down	-0.367147	0.0768949	0.000136489
ISC/EB-1	LOC5567581	Ctri11233	LOC5567581|AAEL006174	Down	-0.368707	0.167807	0.0287942
ISC/EB-1	LOC5570534	Ctri09307	LOC5570534|AAEL001421	Down	-0.369874	0.122848	0.00279944
ISC/EB-1	LOC5574485	Ctri05785	LOC5574485|AAEL002372	Down	-0.371557	0.0262942	1.34493e-05
ISC/EB-1	LOC23687516	Ctri09168	LOC23687516|AAEL017096	Down	-0.382694	0.0259309	2.97724e-06
ISC/EB-1	LOC5571080	Ctri11442	LOC5571080|AAEL008787	Down	-0.387444	0.126929	0.00279944
ISC/EB-1	LOC110675611	Ctri08952	LOC110675611|AAEL026833	Down	-0.389474	0.0895811	0.000818597
ISC/EB-1	LOC5572308	Ctri11160	LOC5572308|AAEL009700	Down	-0.390939	0.171292	0.0243951
ISC/EB-1	LOC5569288	Ctri08848	LOC5569288|AAEL007547	Down	-0.396118	0.126214	0.00279944
ISC/EB-1	LOC5569899	Ctri10405	LOC5569899|AAEL007990	Down	-0.396781	0.15959	0.015197
ISC/EB-1	LOC5574197	Ctri07740	LOC5574197|AAEL002296	Down	-0.398936	0.16834	0.0189962
ISC/EB-1	LOC5577327	Ctri10881	LOC5577327|AAEL000410	Down	-0.404107	0.133841	0.00519896
ISC/EB-1	LOC5576472	Ctri01479	LOC5576472|AAEL002886	Down	-0.406699	0.0858346	0.000149797
ISC/EB-1	LOC5568211	Ctri11310	LOC5568211|AAEL006642	Down	-0.413724	0.0611523	0.000100349
ISC/EB-1	LOC5569968	Ctri07166	LOC5569968|AAEL020092	Down	-0.418616	0.0710221	4.9882e-05
ISC/EB-1	LOC5578313	Ctri04689	LOC5578313|AAEL013625	Down	-0.419699	0.0271651	0.000236669
ISC/EB-1	LOC5576097	Ctri11469	LOC5576097|AAEL002818	Down	-0.422551	0.178671	0.0209958
ISC/EB-1	LOC5570108	Ctri01528	LOC5570108|AAEL020238	Down	-0.427194	0.0313935	1.84093e-06
ISC/EB-1	LOC5565647	Ctri10350	LOC5565647|AAEL004913	Down	-0.428994	0.185951	0.0187962
ISC/EB-1	LOC5568141	Ctri09372	LOC5568141|AAEL006582	Down	-0.429442	0.177157	0.0139972
ISC/EB-1	LOC5572049	Ctri06746	LOC5572049|AAEL000245	Down	-0.43176	0.176425	0.0163967
ISC/EB-1	LOC5565601	Ctri02909	LOC5565601|AAEL004874	Down	-0.433515	0.202439	0.0319936
ISC/EB-1	LOC5568659	Ctri11000	LOC5568659|AAEL007019	Down	-0.433638	0.0997355	0.00114284
ISC/EB-1	LOC5567495	Ctri07757	LOC5567495|AAEL000934	Down	-0.433767	0.137001	0.00246531
ISC/EB-1	LOC5574496	Ctri05779	LOC5574496|AAEL002399	Down	-0.440135	0.143826	0.00319936
ISC/EB-1	LOC5577723	Ctri05950	LOC5577723|AAEL013359	Down	-0.440804	0.031622	1.84443e-06
ISC/EB-1	LOC5577910	Ctri03755	LOC5577910|AAEL003352	Down	-0.441698	0.0985599	0.000820752
ISC/EB-1	LOC110675609	Ctri08951	LOC110675609|AAEL021795	Down	-0.442747	0.0655579	7.57715e-05
ISC/EB-1	LOC5571414	Ctri12332	LOC5571414|AAEL009041	Down	-0.44281	0.210736	0.0343931
ISC/EB-1	LOC5570930	Ctri05956	LOC5570930|AAEL008672	Down	-0.443551	0.165296	0.00639872
ISC/EB-1	LOC5568521	Ctri07148	LOC5568521|AAEL006928	Down	-0.443941	0.132017	0.00298966
ISC/EB-1	LOC5573319	Ctri02858	LOC5573319|AAEL010403	Down	-0.445428	0.149455	0.0029994
ISC/EB-1	LOC5564179	Ctri11388	LOC5564179|AAEL004141	Down	-0.452416	0.1699	0.00859828
ISC/EB-1	LOC5579472	Ctri00187	LOC5579472|AAEL007650	Down	-0.452808	0.107866	0.000557022
ISC/EB-1	LOC5577456	Ctri12077	LOC5577456|AAEL013199	Down	-0.453074	0.182374	0.0125975
ISC/EB-1	LOC5567163	Ctri10964	LOC5567163|AAEL005901	Down	-0.454712	0.029593	6.9308e-05
ISC/EB-1	LOC5570396	Ctri08987	LOC5570396|AAEL008291	Down	-0.457357	0.175635	0.00979804
ISC/EB-1	LOC5568471	Ctri08825	LOC5568471|AAEL006885	Down	-0.45967	0.0468575	3.20051e-06
ISC/EB-1	LOC5575934	Ctri10706	LOC5575934|AAEL009677	Down	-0.467867	0.23268	0.04999
ISC/EB-1	LOC5567908	Ctri00751	LOC5567908|AAEL006363	Down	-0.468211	0.225747	0.0403919
ISC/EB-1	LOC5566236	Ctri09016	LOC5566236|AAEL005269	Down	-0.473919	0.0910724	0.000320356
ISC/EB-1	LOC5566689	Ctri08372	LOC5566689|AAEL005579	Down	-0.474116	0.17658	0.00759848
ISC/EB-1	LOC5579102	Ctri08041	LOC5579102|AAEL003824	Down	-0.476508	0.131316	0.00179976
ISC/EB-1	LOC5577369	Ctri10848	LOC5577369|AAEL000454	Down	-0.478108	0.117836	0.000932003
ISC/EB-1	LOC5567821	Ctri12406	LOC5567821|AAEL000986	Down	-0.479582	0.100861	0.000472651
ISC/EB-1	LOC5568408	Ctri00026	LOC5568408|AAEL006829	Down	-0.480732	0.117762	0.000879002
ISC/EB-1	LOC5580331	Ctri05865	LOC5580331|AAEL013074	Down	-0.484273	0.108025	0.00034755
ISC/EB-1	LOC5564530	Ctri04819	LOC5564530|AAEL013092	Down	-0.486753	0.192057	0.009998
ISC/EB-1	LOC5580021	Ctri01385	LOC5580021|AAEL009646	Down	-0.48764	0.155425	0.00381401
ISC/EB-1	LOC5564860	Ctri11711	LOC5564860|AAEL004472	Down	-0.487702	0.140167	0.00196488
ISC/EB-1	LOC5568807	Ctri05088	LOC5568807|AAEL001177	Down	-0.490608	0.208155	0.020196
ISC/EB-1	LOC5579041	Ctri06255	LOC5579041|AAEL013989	Down	-0.49125	0.108811	0.000357151
ISC/EB-1	LOC5572208	Ctri10657	LOC5572208|AAEL009606	Down	-0.49168	0.23489	0.0371926
ISC/EB-1	LOC5564552	Ctri12474	LOC5564552|AAEL004311	Down	-0.493448	0.160669	0.00416158
ISC/EB-1	LOC5571783	Ctri02550	LOC5571783|AAEL009320	Down	-0.493628	0.109372	0.000663115
ISC/EB-1	LOC5577356	Ctri10859	LOC5577356|AAEL000417	Down	-0.494247	0.201866	0.020196
ISC/EB-1	LOC5576251	Ctri06359	LOC5576251|AAEL012409	Down	-0.496834	0.221549	0.0329934
ISC/EB-1	LOC5565159	Ctri02658	LOC5565159|AAEL004613	Down	-0.502731	0.174793	0.00539892
ISC/EB-1	LOC5575986	Ctri01977	LOC5575986|AAEL002764	Down	-0.506005	0.140564	0.00144814
ISC/EB-1	LOC5567501	Ctri06472	LOC5567501|AAEL006115	Down	-0.506025	0.0776242	0.000200955
ISC/EB-1	LOC5576737	Ctri02088	LOC5576737|AAEL002978	Down	-0.51062	0.205856	0.0125975
ISC/EB-1	LOC5569518	Ctri03514	LOC5569518|AAEL007704	Down	-0.51119	0.168769	0.00379924
ISC/EB-1	LOC5580010	Ctri02516	LOC5580010|AAEL009637	Down	-0.5129	0.100846	0.000310085
ISC/EB-1	LOC5578538	Ctri09554	LOC5578538|AAEL013744	Down	-0.513118	0.133947	0.000862888
ISC/EB-1	LOC5567647	Ctri12209	LOC5567647|AAEL027611	Down	-0.513429	0.148531	0.00201157
ISC/EB-1	LOC5579505	Ctri02683	LOC5579505|AAEL015136	Down	-0.514777	0.203192	0.00779844
ISC/EB-1	LOC5567237	Ctri07324	LOC5567237|AAEL000874	Down	-0.518167	0.235264	0.029994
ISC/EB-1	LOC5573615	Ctri06382	LOC5573615|AAEL010611	Down	-0.522661	0.111957	0.000348129
ISC/EB-1	LOC5567118	Ctri10603	LOC5567118|AAEL015304	Down	-0.525428	0.201844	0.00839832
ISC/EB-1	LOC5565760	Ctri04925	LOC5565760|AAEL004981	Down	-0.526574	0.253585	0.0365927
ISC/EB-1	LOC5566684	Ctri12675	LOC5566684|AAEL005567	Down	-0.527119	0.08464	0.00131219
ISC/EB-1	LOC5570914	Ctri05640	LOC5570914|AAEL001479	Down	-0.530274	0.185689	0.00419916
ISC/EB-1	LOC5565589	Ctri02647	LOC5565589|AAEL004865	Down	-0.53147	0.0543539	3.09018e-05
ISC/EB-1	LOC5574648	Ctri00832	LOC5574648|AAEL011288	Down	-0.533267	0.0413952	1.94335e-05
ISC/EB-1	LOC23687502	Ctri05468	LOC23687502|AAEL017082	Down	-0.539326	0.156344	0.00162779
ISC/EB-1	LOC5577080	Ctri09531	LOC5577080|AAEL012980	Down	-0.539921	0.137319	0.00155403
ISC/EB-1	LOC5578495	Ctri00245	LOC5578495|AAEL002335	Down	-0.543775	0.190232	0.00459908
ISC/EB-1	LOC5579480	Ctri09456	LOC5579480|AAEL015314	Down	-0.547816	0.26611	0.0437912
ISC/EB-1	LOC5564117	Ctri08339	LOC5564117|AAEL019408	Down	-0.549318	0.0892348	0.000153261
ISC/EB-1	LOC5575846	Ctri03986	LOC5575846|AAEL012119	Down	-0.55077	0.223695	0.0165967
ISC/EB-1	LOC5577509	Ctri02587	LOC5577509|AAEL003206	Down	-0.552223	0.225641	0.0177964
ISC/EB-1	LOC5574731	Ctri05290	LOC5574731|AAEL011371	Down	-0.553924	0.106859	0.000379475
ISC/EB-1	LOC5576201	Ctri03175	LOC5576201|AAEL012394	Down	-0.554989	0.222769	0.0133973
ISC/EB-1	LOC5572011	Ctri00897	LOC5572011|AAEL021276	Down	-0.55786	0.257856	0.0361928
ISC/EB-1	LOC5572804	Ctri04440	LOC5572804|AAEL001898	Down	-0.559413	0.217915	0.0169966
ISC/EB-1	LOC5576894	Ctri01295	LOC5576894|AAEL003046	Down	-0.55967	0.0891617	0.000252146
ISC/EB-1	LOC5564183	Ctri11386	LOC5564183|AAEL004121	Down	-0.562033	0.204818	0.00979804
ISC/EB-1	LOC5574167	Ctri10827	LOC5574167|AAEL010977	Down	-0.563788	0.0436701	3.37387e-05
ISC/EB-1	LOC5567962	Ctri04122	LOC5567962|AAEL019461	Down	-0.564321	0.204368	0.00719856
ISC/EB-1	LOC5568428	Ctri07140	LOC5568428|AAEL006836	Down	-0.567945	0.228544	0.0155969
ISC/EB-1	LOC5570959	Ctri05167	LOC5570959|AAEL008696	Down	-0.568856	0.232691	0.0159968
ISC/EB-1	LOC5572931	Ctri05300	LOC5572931|AAEL010145	Down	-0.573533	0.115455	0.000186568
ISC/EB-1	LOC5577289	Ctri09614	LOC5577289|AAEL013139	Down	-0.583979	0.0723347	6.51486e-06
ISC/EB-1	LOC5575395	Ctri12122	LOC5575395|AAEL011803	Down	-0.58452	0.199442	0.00559888
ISC/EB-1	LOC5572432	Ctri05726	LOC5572432|AAEL001810	Down	-0.58455	0.187516	0.00259948
ISC/EB-1	LOC5563904	Ctri06876	LOC5563904|AAEL003993	Down	-0.585339	0.127348	0.000230417
ISC/EB-1	LOC5579263	Ctri09347	LOC5579263|AAEL011873	Down	-0.585791	0.137537	0.000841312
[truncated: 11,528 more rows]

## Sheet: alb_vs_cxpip
Cluster	Ae. albopictus	Cx. p. pallens (Ctrl)	NCBI|VectorBase ID of Ae. aegypti orthologs	Regulation	de_coef	de_se	de_pval
[truncated: 10,004 more rows]

[truncated: 2 more sheets: alb_vs_cxtri, cxpip_vs_cxtri]
