# Supplementary material for: Midgut cell atlas and virome of four important mosquito species and immune landscapes of dengue virus infection
Source: Research Square preprint supplement (doi:10.21203/rs.3.rs-7214530/v1), 2025-08-11
Supplement: Supplementary file 6 [file ead9f2ee44b182dd40cb7319.xlsx]

## Sheet: ISC_EB-1
gene	VectorBase_ID	Regulation	de_coef	de_se	de_pval
LOC5578307	AAEL013628	Up	0.913001	0.0648768	3.92671e-05
LOC5573855	AAEL010776	Up	0.797544	0.116096	0.000109237
LOC5570465	AAEL026904	Up	0.777638	0.0207893	2.88507e-08
LOC5566322	AAEL005289	Up	0.767693	0.11739	7.7827e-05
LOC5564567	AAEL014516	Up	0.766093	0.037819	1.21265e-07
LOC5574993	AAEL002534	Up	0.674761	0.0251326	9.89268e-07
LOC5566484	AAEL005401	Up	0.64062	0.0608877	4.63356e-05
LOC5571803	AAEL009330	Up	0.607622	0.0635392	3.20862e-05
LOC110676831	-	Up	0.605492	0.0815033	0.000184628
LOC5571053	AAEL008769	Up	0.590725	0.0928058	0.00019586
LOC5567109	AAEL005832	Up	0.580468	0.092332	0.000261201
LOC5569925	AAEL027654	Up	0.526651	0.0938278	0.000448806
LOC5573532	AAEL010558	Up	0.488725	0.0655685	0.000115852
LOC110676293	AAEL003723	Up	0.481567	0.0458961	2.24017e-05
LOC5564226	-	Up	0.480357	0.0151849	8.05393e-05
LOC5566474	AAEL005400	Up	0.478229	0.091327	0.00046428
LOC5578922	AAEL003764	Up	0.465114	0.126821	0.00165024
LOC5571997	AAEL009487	Up	0.459246	0.0971417	0.00054189
LOC5569222	AAEL007494	Up	0.455168	0.0818421	0.00019124
LOC5578184	AAEL003469	Up	0.453538	0.128094	0.00203056
LOC5579836	AAEL005868	Up	0.433181	0.114134	0.00107422
LOC110674237	AAEL026466	Up	0.422478	0.0399437	9.07278e-05
LOC5579654	AAEL003970	Up	0.413905	0.0887595	0.000282168
LOC5578343	AAEL003514	Up	0.410002	0.121882	0.00258417
LOC5578505	AAEL013703	Up	0.409414	0.0422156	3.80362e-05
LOC5578532	AAEL013739	Up	0.407544	0.117764	0.00264295
LOC5570883	AAEL008658	Up	0.403527	0.0981527	0.00046421
LOC5578857	AAEL027402	Up	0.392474	0.0566727	4.31048e-05
LOC110677919	AAEL020749	Up	0.372202	0.0129057	0.000140393
LOC5566525	AAEL005455	Up	0.361357	0.126945	0.00619876
LOC5577377	AAEL000428	Up	0.355425	0.131281	0.00979804
LOC5578360	AAEL024675	Up	0.354591	0.116061	0.00279944
LOC5571039	AAEL008784	Up	0.348147	0.0569227	0.000321527
LOC5569531	AAEL007715	Up	0.343905	0.0126201	7.22579e-05
LOC5572968	AAEL010168	Up	0.339838	0.012963	8.29721e-05
LOC5572725	AAEL009994	Up	0.339307	0.0180499	8.57607e-05
LOC5571208	AAEL008893	Up	0.337256	0.0773683	0.000589
LOC5570432	AAEL008329	Up	0.336961	0.0127479	2.60131e-07
LOC5571844	AAEL001703	Up	0.33226	0.0225992	9.62603e-06
LOC5567454	AAEL000944	Up	0.330252	0.100565	0.00279944
LOC5563787	AAEL003924	Up	0.328566	0.115442	0.00579884
LOC5571304	AAEL008953	Up	0.314513	0.0410557	0.000607831
LOC5570108	AAEL020238	Up	0.310762	0.0154546	0.000122737
LOC5572634	AAEL001863	Up	0.309644	0.0296595	2.02663e-05
LOC5564492	AAEL004294	Up	0.297832	0.119365	0.0167966
LOC5574139	AAEL010954	Up	0.292197	0.120062	0.0163967
LOC5577930	AAEL025363	Up	0.285545	0.123809	0.0261948
LOC5578833	AAEL013876	Up	0.285353	0.0931422	0.00319936
LOC5570169	AAEL008141	Up	0.278868	0.118177	0.0209958
LOC5577309	AAEL013158	Up	0.277601	0.0324421	4.0233e-05
LOC110678029	AAEL021557	Up	0.273559	0.0928887	0.00459908
LOC5570455	AAEL008341	Up	0.273145	0.0794712	0.0018354
LOC5568583	AAEL001113	Up	0.271638	0.0887651	0.00259948
LOC5575751	AAEL002722	Up	0.271285	0.127788	0.0333933
LOC23687442	AAEL017022	Up	0.266659	0.03411	7.62297e-05
LOC5567793	AAEL000138	Up	0.262807	0.108574	0.0179964
LOC23687857	AAEL017437	Up	0.262786	0.0772126	0.00185232
LOC5577655	AAEL003275	Up	0.261812	0.124464	0.0383923
LOC5569529	AAEL007699	Up	0.259421	0.0113055	0.000187683
LOC5573858	AAEL010782	Up	0.253128	0.0837603	0.00319936
LOC5575162	AAEL000328	Up	0.252831	0.110851	0.0279944
LOC5578538	AAEL013744	Up	0.252447	0.104059	0.0159968
LOC5575105	AAEL011656	Up	0.252088	0.0132505	7.47234e-07
LOC5573536	AAEL010576	Up	0.250454	0.0841596	0.0039992
LOC5566092	AAEL005170	Up	0.249556	0.0488201	0.000279902
LOC5566220	AAEL005270	Up	0.245983	0.0404337	0.000984028
LOC5576917	AAEL012860	Up	0.245449	0.121468	0.0485903
LOC5569780	AAEL007926	Up	0.245412	0.117737	0.0469906
LOC5579111	AAEL003835	Up	0.244338	0.0955203	0.00879824
LOC5564544	AAEL004319	Up	0.243198	0.0986842	0.0127974
LOC5580329	AAEL013069	Up	0.240841	0.0182744	0.000268303
LOC5566373	AAEL005353	Up	0.239985	0.110116	0.0343931
LOC5566219	AAEL005255	Up	0.239297	0.112371	0.0331934
LOC5567286	AAEL005946	Up	0.237857	0.0973976	0.0173965
LOC5574612	AAEL011255	Up	0.236223	0.0616288	0.00098918
LOC5573990	AAEL010840	Up	0.22804	0.0986272	0.0227954
LOC5575790	AAEL012062	Up	0.217459	0.044571	0.000371843
LOC5565400	AAEL004783	Up	0.216943	0.047338	0.00213591
LOC5564556	AAEL004325	Up	0.214028	0.0158763	0.000262336
LOC5565700	AAEL004930	Up	0.213476	0.0622293	0.00223582
LOC5580192	AAEL002551	Up	0.213339	0.0683037	0.00197362
LOC5571955	AAEL026633	Up	0.213126	0.0743875	0.00379924
LOC5572857	AAEL010070	Up	0.210039	0.0925728	0.0267946
LOC5580030	AAEL009653	Up	0.209378	0.0126323	1.19594e-05
LOC5571450	AAEL009078	Up	0.20906	0.092458	0.0261948
LOC5579172	AAEL003888	Up	0.208786	0.0679209	0.00279944
LOC5566236	AAEL005269	Up	0.206418	0.0504008	0.000835578
LOC23687936	AAEL017516	Up	0.205959	0.0126834	0.000186031
LOC5567031	AAEL005766	Up	0.205091	0.0503625	0.00311097
LOC5567636	AAEL024235	Up	0.203091	0.0918781	0.0285943
LOC5571086	AAEL026403	Up	0.199601	0.077432	0.0119976
LOC5565892	AAEL000713	Up	0.197394	0.069714	0.004999
LOC5578839	AAEL019482	Up	0.191331	0.0821517	0.0203959
LOC5578313	AAEL013625	Up	0.189284	0.0137175	0.000206833
LOC5571932	AAEL009387	Up	0.187819	0.0802274	0.0217956
LOC5567163	AAEL005901	Up	0.183617	0.0159541	0.000442728
LOC5570007	AAEL000175	Up	0.177852	0.0580051	0.0029994
LOC5567396	AAEL006053	Up	0.174297	0.058099	0.00319936
LOC5578793	AAEL003676	Up	0.172419	0.0492334	0.00191201
LOC5573968	AAEL010823	Up	0.171807	0.0572538	0.00279944
LOC5569122	AAEL007383	Up	0.170141	0.0479388	0.00218861
LOC110677764	AAEL024434	Up	0.168873	0.0114924	0.000137233
LOC5563777	AAEL019599	Up	0.168507	0.0870953	0.0483903
LOC5580010	AAEL009637	Up	0.168221	0.0647304	0.00879824
LOC5570243	AAEL008192	Up	0.162833	0.0154829	0.000505945
LOC5576758	AAEL025553	Up	0.162484	0.0130675	0.000201983
LOC5572534	AAEL009859	Up	0.162224	0.0281689	0.000351043
LOC5576653	AAEL012686	Up	0.16215	0.0120273	0.000282083
LOC23687404	AAEL016984	Up	0.160188	0.0382032	0.000583689
LOC5563590	AAEL000032	Up	0.157914	0.0156184	0.000508953
LOC5570675	AAEL008481	Up	0.157885	0.0117692	0.00025028
LOC5571186	AAEL029013	Up	0.15703	0.0464886	0.00454275
LOC5575800	AAEL012078	Up	0.154533	0.0699332	0.0285943
LOC5572365	AAEL009747	Up	0.153816	0.0142309	0.000291097
LOC5566843	AAEL000823	Up	0.153003	0.01221	3.8678e-06
LOC23687632	AAEL017212	Up	0.151373	0.0484825	0.00304374
LOC5565541	AAEL004829	Up	0.145484	0.0572444	0.0129974
LOC5576221	AAEL002833	Up	0.143938	0.0532765	0.0069986
LOC5578306	AAEL013623	Up	0.141621	0.0443896	0.00270489
LOC5568355	AAEL001061	Up	0.138048	0.0435439	0.00284147
LOC5571937	AAEL009422	Up	0.137874	0.060566	0.0211958
LOC5573413	AAEL002047	Up	0.136453	0.0128494	0.000538729
LOC5578368	AAEL003530	Up	0.133416	0.0102788	0.000313145
LOC5574167	AAEL010977	Up	0.130971	0.0274993	0.000366792
LOC5574844	AAEL011447	Up	0.130022	0.0114193	1.58382e-05
LOC110676045	AAEL022286	Up	0.129497	0.0112124	0.000285312
LOC5563695	AAEL000549	Up	0.122446	0.0244986	0.000224926
LOC5575037	AAEL011587	Up	0.112565	0.011993	0.000505299
LOC5576353	AAEL002881	Up	0.108912	0.043943	0.0109978
LOC5580259	AAEL012585	Up	0.0994394	0.0136491	0.000947546
LOC5565979	AAEL005097	Up	0.0931046	0.0146809	0.00125984
LOC5577996	AAEL003396	Up	0.0929513	0.0107028	2.69439e-05
LOC5563786	AAEL003942	Up	0.0884963	0.0120153	0.000744764
LOC5566959	AAEL005722	Up	0.0873728	0.0128098	0.000907162
LOC110676232	AAEL023983	Up	0.0843818	0.0127556	5.2656e-05
LOC5567964	AAEL006425	Up	0.0839464	0.0370002	0.0273945
LOC5572090	AAEL009496	Up	0.0793632	0.0151162	0.000474266
LOC5565474	AAEL002495	Up	0.077405	0.0356949	0.0335933
LOC5577034	AAEL012944	Up	0.0721198	0.0120986	0.00119188
LOC5575450	AAEL002639	Up	0.0720637	0.013936	0.00152111
LOC5573217	AAEL010299	Up	0.0712996	0.0118321	0.00116205
LOC5567070	AAEL005817	Up	0.0660199	0.0118089	0.00131686
LOC5578625	AAEL003582	Up	0.0578166	0.0130883	0.00208485
LOC5571846	AAEL023681	Up	0.054177	0.0126759	0.000740211
LOC5569582	AAEL007771	Up	0.0540233	0.0120282	0.00146284
LOC5567848	AAEL000987	Up	0.0454776	0.0107419	0.00060262
LOC5568090	AAEL006511	Up	0.0407294	0.0117373	0.0036831
LOC23687618	AAEL017198	Up	0.0399603	0.0098122	0.0023702
LOC5565624	AAEL014292	Up	0.0374334	0.0145227	0.010198
LOC5570139	AAEL008103	Up	0.0353607	0.0116893	0.00239952
LOC5571564	AAEL009151	Up	0.0300074	0.0114291	0.00859828
LOC5570244	AAEL008188	Down	-0.033423	0.0106432	0.00258425
LOC5566522	AAEL005451	Down	-0.0373142	0.0109221	0.00181629
LOC5564921	AAEL004500	Down	-0.0416992	0.0200433	0.0391922
LOC5579186	AAEL003872	Down	-0.0477617	0.0161967	0.00335668
LOC5574648	AAEL011288	Down	-0.0499818	0.0257002	0.0479904
LOC5566228	AAEL005266	Down	-0.0543304	0.011728	0.00231967
LOC5568260	AAEL006698	Down	-0.0564314	0.0119928	0.000192426
LOC5564925	AAEL019568	Down	-0.0579916	0.0235389	0.0133973
LOC5573872	AAEL010787	Down	-0.0610913	0.0235793	0.010198
LOC5574515	AAEL019717	Down	-0.0650885	0.0279625	0.0231954
LOC5576966	AAEL003060	Down	-0.0658138	0.0232913	0.0039992
LOC5578155	AAEL013533	Down	-0.0666085	0.025216	0.00839832
LOC5576215	AAEL002832	Down	-0.0771886	0.00909262	0.000129015
LOC5564212	AAEL004151	Down	-0.0793763	0.0132081	0.000922959
LOC5576896	AAEL003039	Down	-0.0882377	0.0456617	0.0495901
LOC5563646	AAEL021083	Down	-0.0904559	0.010591	1.67998e-05
LOC23687901	AAEL017481	Down	-0.0909897	0.039953	0.0213957
LOC5573732	AAEL000291	Down	-0.0928166	0.0456146	0.0419916
LOC5563592	AAEL000010	Down	-0.0942514	0.0146842	0.00068777
LOC5571927	AAEL020290	Down	-0.0959566	0.0114063	0.000753673
LOC5571609	AAEL009201	Down	-0.0973889	0.0430305	0.0253949
LOC23687536	AAEL017116	Down	-0.0985677	0.0501723	0.0457908
LOC110678734	AAEL019403	Down	-0.0987162	0.0141168	0.000937653
LOC5566772	AAEL005629	Down	-0.101386	0.0103019	0.000561798
LOC5564713	AAEL014583	Down	-0.105183	0.00967072	6.76022e-06
LOC5573211	AAEL010318	Down	-0.111473	0.02154	0.000243883
LOC5569984	AAEL008073	Down	-0.116479	0.0578662	0.0455909
LOC5572931	AAEL010145	Down	-0.124676	0.0499738	0.0145971
LOC5571735	AAEL009257	Down	-0.126235	0.0456032	0.00719856
LOC5573879	AAEL010801	Down	-0.127478	0.0532795	0.014997
LOC23687495	AAEL017075	Down	-0.131677	0.0311013	0.00110897
LOC5571763	AAEL009287	Down	-0.131839	0.0621475	0.0273945
LOC5570505	AAEL001411	Down	-0.134056	0.066655	0.0437912
LOC110676279	AAEL021140	Down	-0.139608	0.034871	0.00300008
LOC5567341	AAEL006011	Down	-0.140052	0.0285029	0.000742419
LOC5566775	AAEL005638	Down	-0.140605	0.0595195	0.0173965
LOC5576894	AAEL003046	Down	-0.144481	0.0645944	0.0227954
LOC110677182	-	Down	-0.145542	0.0197136	0.0001138
LOC5568436	AAEL012661	Down	-0.145961	0.0392967	0.00171012
LOC5564392	AAEL004234	Down	-0.146093	0.0670316	0.0321936
LOC5576046	AAEL014932	Down	-0.148999	0.026413	0.000343987
LOC110678855	AAEL025367	Down	-0.150545	0.0545628	0.00659868
LOC5564878	AAEL004457	Down	-0.151586	0.0417905	0.00129317
LOC5566551	AAEL005471	Down	-0.151981	0.0608788	0.0131974
LOC5575242	AAEL011711	Down	-0.159385	0.0367843	0.000590466
LOC5565441	AAEL000641	Down	-0.160294	0.059375	0.00619876
LOC5568465	AAEL006860	Down	-0.160819	0.0147772	0.000529841
LOC5577723	AAEL013359	Down	-0.160934	0.0183466	5.55739e-06
LOC5574966	AAEL002527	Down	-0.16159	0.0490372	0.0025036
LOC5571785	AAEL009313	Down	-0.162394	0.0317683	0.000205338
LOC5572071	AAEL001715	Down	-0.166448	0.0579078	0.00459908
LOC5571571	AAEL009160	Down	-0.16936	0.0589582	0.00539892
LOC5570335	AAEL019669	Down	-0.169966	0.0347274	0.00141314
LOC5575898	AAEL002737	Down	-0.172258	0.0410264	0.000424961
LOC5573418	AAEL002083	Down	-0.172952	0.0364315	0.00167391
LOC5572840	AAEL010063	Down	-0.172968	0.0781297	0.0269946
LOC5567839	AAEL001005	Down	-0.173295	0.0523778	0.00275889
LOC5568481	AAEL006879	Down	-0.173406	0.0878429	0.0419916
LOC5576440	AAEL005536	Down	-0.175409	0.0615769	0.004999
LOC5567660	AAEL012740	Down	-0.175681	0.0198338	1.12609e-05
LOC5571466	AAEL009101	Down	-0.180862	0.0465491	0.00240688
LOC5569745	AAEL007883	Down	-0.181727	0.0473869	0.000904652
LOC5576642	AAEL012671	Down	-0.184045	0.0589207	0.00304061
LOC5568611	AAEL006976	Down	-0.184927	0.0856171	0.0271946
LOC5569863	AAEL007945	Down	-0.185032	0.0367457	0.000317366
LOC5573372	AAEL010467	Down	-0.186837	0.0761374	0.0127974
LOC5569144	AAEL007392	Down	-0.187982	0.063603	0.00319936
LOC5576609	AAEL012635	Down	-0.190372	0.0792786	0.0131974
LOC5565301	AAEL004715	Down	-0.190577	0.0912362	0.0377924
LOC5573744	AAEL019937	Down	-0.195378	0.0607925	0.00285171
LOC5569166	AAEL007431	Down	-0.195821	0.08269	0.0143971
LOC5579041	AAEL013989	Down	-0.196275	0.0803248	0.0145971
LOC5569212	AAEL019885	Down	-0.197583	0.081828	0.0155969
LOC110679374	AAEL026843	Down	-0.197895	0.062057	0.00288727
LOC5578123	AAEL003427	Down	-0.199604	0.00963539	0.000134608
LOC5566847	AAEL000795	Down	-0.199623	0.024594	9.11277e-05
LOC5565962	AAEL005220	Down	-0.200219	0.0141569	0.000284235
LOC5568764	AAEL010704	Down	-0.200266	0.0979984	0.0403919
LOC5566059	AAEL005143	Down	-0.201511	0.0544054	0.0016966
LOC5566596	AAEL000758	Down	-0.203528	0.0850227	0.0179964
LOC5575914	AAEL012175	Down	-0.204638	0.0392553	0.000408629
LOC5564874	AAEL004460	Down	-0.205572	0.0567723	0.00389441
LOC5564516	AAEL004284	Down	-0.206075	0.0646096	0.00321472
LOC5578900	AAEL013904	Down	-0.206682	0.0672423	0.0031761
LOC5565878	AAEL000679	Down	-0.206972	0.0705988	0.00379924
LOC5569083	AAEL001209	Down	-0.207392	0.102138	0.0383923
LOC5577327	AAEL000410	Down	-0.207441	0.0900655	0.020196
LOC5577289	AAEL013139	Down	-0.208555	0.0473895	0.000605004
LOC5565589	AAEL004865	Down	-0.209602	0.0358293	0.000214283
LOC5574404	AAEL011116	Down	-0.211344	0.0464563	0.000291208
LOC5574496	AAEL002399	Down	-0.2123	0.104002	0.0383923
LOC23687839	AAEL017419	Down	-0.212556	0.0361594	2.7397e-05
LOC5572929	AAEL010148	Down	-0.212643	0.109496	0.0485903
LOC5568471	AAEL006885	Down	-0.212659	0.0265101	2.84137e-05
LOC5569520	AAEL007707	Down	-0.214538	0.0594983	0.00178393
LOC5579505	AAEL015136	Down	-0.217506	0.106363	0.0355929
LOC23687827	AAEL025574	Down	-0.217615	0.0939642	0.0179964
LOC5576744	AAEL024536	Down	-0.21814	0.0120617	7.82248e-06
LOC5580070	AAEL002160	Down	-0.218633	0.0603142	0.0015734
LOC5573016	AAEL001946	Down	-0.218684	0.0998858	0.0277944
LOC110679868	AAEL027050	Down	-0.221834	0.0763137	0.00379924
LOC5565230	AAEL004653	Down	-0.22219	0.11283	0.0467906
LOC5572525	AAEL009844	Down	-0.222215	0.072535	0.00259948
LOC5570509	AAEL001432	Down	-0.222463	0.0745778	0.0039992
LOC5568680	AAEL007029	Down	-0.22258	0.11334	0.0483903
LOC5572383	AAEL009772	Down	-0.223727	0.0872891	0.00959808
LOC5564072	AAEL004067	Down	-0.224023	0.0886777	0.0125975
LOC5575103	AAEL011657	Down	-0.225093	0.0822635	0.00659868
LOC5573319	AAEL010403	Down	-0.22517	0.108141	0.0331934
LOC5578927	AAEL003750	Down	-0.226764	0.0272642	1.88431e-05
LOC5570020	AAEL000182	Down	-0.228148	0.0688393	0.005338
LOC5580325	AAEL013068	Down	-0.228937	0.0579799	0.000655157
LOC5576345	AAEL002866	Down	-0.229461	0.103412	0.0277944
LOC5566520	AAEL005457	Down	-0.229616	0.114109	0.0437912
LOC5578487	AAEL003552	Down	-0.230683	0.0996285	0.0193961
LOC5576472	AAEL002886	Down	-0.230717	0.0515899	0.000224711
LOC5573885	AAEL010798	Down	-0.231388	0.0820244	0.00419916
LOC5577999	AAEL003393	Down	-0.231727	0.0557786	0.00031521
LOC5568784	AAEL007135	Down	-0.232039	0.0625001	0.00196895
LOC5568303	AAEL006751	Down	-0.232211	0.043668	0.00163618
LOC5577061	AAEL003103	Down	-0.232744	0.0612049	0.000741075
LOC23687805	AAEL017385	Down	-0.233327	0.112007	0.0337932
LOC5570534	AAEL001421	Down	-0.234003	0.0918916	0.0127974
LOC5573678	AAEL010661	Down	-0.23485	0.0863753	0.0069986
LOC5568457	AAEL006854	Down	-0.235698	0.109792	0.030194
LOC5572753	AAEL010018	Down	-0.236635	0.0452	0.000281091
LOC5567491	AAEL000951	Down	-0.237218	0.0224335	2.52749e-05
LOC5575982	AAEL019430	Down	-0.237605	0.0894642	0.00819836
LOC5578389	AAEL013679	Down	-0.237899	0.112716	0.0321936
LOC5570653	AAEL008461	Down	-0.240397	0.0792323	0.00239952
LOC5573065	AAEL014511	Down	-0.241281	0.0801475	0.00259948
LOC5579472	AAEL007650	Down	-0.241597	0.0769364	0.00268356
LOC5575238	AAEL011708	Down	-0.241606	0.050755	0.0019684
LOC5578301	AAEL013620	Down	-0.243366	0.105451	0.0187962
LOC5565770	AAEL004986	Down	-0.245274	0.109165	0.0245951
LOC5576220	AAEL002834	Down	-0.24573	0.0525547	0.000353414
LOC5564636	AAEL004378	Down	-0.246496	0.0437083	0.000164508
LOC5567207	AAEL000902	Down	-0.247659	0.105988	0.0191962
LOC5575980	AAEL012227	Down	-0.249375	0.116317	0.0291942
LOC5572195	AAEL014715	Down	-0.249831	0.0593185	0.000486446
LOC5569049	AAEL007342	Down	-0.252097	0.0486168	0.00037487
LOC110679353	AAEL025697	Down	-0.252151	0.0694949	0.00055055
LOC5565931	AAEL025321	Down	-0.252656	0.0676814	0.003894
LOC5564924	AAEL023756	Down	-0.252784	0.102308	0.00979804
LOC5578590	AAEL013774	Down	-0.253303	0.0664383	0.00122892
LOC5565702	AAEL014943	Down	-0.254223	0.0555804	0.000338645
LOC5575386	AAEL011789	Down	-0.254943	0.0962822	0.00659868
LOC5574338	AAEL002334	Down	-0.25514	0.0438719	0.000196155
LOC5577997	AAEL003385	Down	-0.255833	0.100749	0.0117976
LOC5573751	AAEL000294	Down	-0.257154	0.0590778	0.000869558
LOC5571544	AAEL009129	Down	-0.257251	0.0597334	0.000488835
LOC5579902	AAEL001044	Down	-0.257297	0.0968524	0.00779844
LOC5577178	AAEL013047	Down	-0.257526	0.105121	0.0137972
LOC5573948	AAEL002183	Down	-0.258791	0.082137	0.0023879
LOC5574429	AAEL011157	Down	-0.259776	0.0876304	0.00279944
LOC5579199	AAEL014039	Down	-0.261624	0.0446016	0.000167741
LOC5568618	AAEL006977	Down	-0.263481	0.0984649	0.00859828
LOC5578388	AAEL013675	Down	-0.264889	0.0808968	0.00179935
LOC5566751	AAEL015238	Down	-0.266954	0.0831791	0.00203354
LOC5568726	AAEL007078	Down	-0.267338	0.118712	0.0241952
LOC5569968	AAEL020092	Down	-0.267838	0.0403773	0.000131272
LOC5565629	AAEL014913	Down	-0.268227	0.0655154	0.00105311
LOC5571783	AAEL009320	Down	-0.268239	0.0769187	0.00147741
LOC5569950	AAEL008039	Down	-0.270204	0.0465858	0.000185651
LOC5576029	AAEL012262	Down	-0.270877	0.103381	0.00679864
LOC5575995	AAEL002761	Down	-0.271115	0.0747804	0.00153281
LOC5574190	AAEL002308	Down	-0.271757	0.0523661	0.000303884
LOC5579810	AAEL005515	Down	-0.275855	0.0292675	9.69326e-05
LOC5573060	AAEL010244	Down	-0.276601	0.109666	0.0107978
LOC5575108	AAEL011665	Down	-0.278849	0.109079	0.010198
LOC5579021	AAEL013960	Down	-0.281093	0.103108	0.00739852
LOC5571854	AAEL009345	Down	-0.281479	0.0972312	0.00319936
LOC5578497	AAEL013702	Down	-0.28157	0.0732612	0.00148847
LOC5572347	AAEL009733	Down	-0.281889	0.0787582	0.00137029
LOC5577910	AAEL003352	Down	-0.282228	0.0640292	0.000604231
LOC5576139	AAEL022535	Down	-0.285558	0.102564	0.00519896
LOC5577423	AAEL003160	Down	-0.286021	0.0273412	7.37031e-06
LOC5568076	AAEL006520	Down	-0.286178	0.0734736	0.000680539
LOC5574655	AAEL022570	Down	-0.288292	0.0424317	4.75108e-05
LOC5578605	AAEL003589	Down	-0.2893	0.13378	0.029794
LOC5572284	AAEL001759	Down	-0.289513	0.0122115	0.000143007
LOC5577139	AAEL003125	Down	-0.290639	0.108097	0.00719856
LOC5576360	AAEL002860	Down	-0.291599	0.0868551	0.00197437
LOC5578495	AAEL002335	Down	-0.292545	0.113683	0.00819836
LOC5571745	AAEL009275	Down	-0.29266	0.0653623	0.000281588
LOC5576765	AAEL012746	Down	-0.293977	0.0639635	0.000347246
LOC5574383	AAEL011102	Down	-0.294543	0.0890576	0.00213425
LOC5576572	AAEL025570	Down	-0.294667	0.107052	0.00639872
LOC5571080	AAEL008787	Down	-0.295861	0.0861702	0.00176912
LOC5567222	AAEL019724	Down	-0.296199	0.100231	0.00239952
LOC5580239	AAEL012326	Down	-0.297228	0.0368079	1.29887e-05
LOC5574382	AAEL011099	Down	-0.299518	0.066468	0.000552657
LOC5569181	AAEL007441	Down	-0.301692	0.0726759	0.00102023
LOC5577023	AAEL012939	Down	-0.303522	0.0896182	0.00453893
LOC5565266	AAEL004699	Down	-0.304304	0.0605877	0.000324365
LOC5569180	AAEL007444	Down	-0.304386	0.0221282	3.163e-06
LOC23687710	AAEL017290	Down	-0.304591	0.0808892	0.000970521
LOC5569016	AAEL007286	Down	-0.305212	0.11643	0.010198
LOC5571645	AAEL001636	Down	-0.305338	0.106545	0.004999
LOC5573556	AAEL027408	Down	-0.30819	0.074254	0.00250778
LOC5578686	AAEL003634	Down	-0.308557	0.111393	0.00539892
LOC5574592	AAEL002411	Down	-0.308804	0.063463	0.000702966
LOC5572696	AAEL009964	Down	-0.309268	0.0522692	4.61313e-05
LOC5572791	AAEL001896	Down	-0.309584	0.0752913	0.000662813
LOC110676310	AAEL022493	Down	-0.310514	0.0744772	0.000686522
LOC5564787	AAEL004435	Down	-0.311307	0.0969455	0.00268355
LOC5579227	AAEL014064	Down	-0.312342	0.0596135	0.000270654
LOC5578382	AAEL013661	Down	-0.315131	0.033905	0.000437832
LOC5577893	AAEL013407	Down	-0.315591	0.0664478	0.000211646
LOC5568880	AAEL007184	Down	-0.315732	0.103164	0.0039992
LOC5572285	AAEL001779	Down	-0.315796	0.0928026	0.00147302
LOC5565148	AAEL004620	Down	-0.317185	0.100638	0.00247809
LOC5579901	AAEL001052	Down	-0.317219	0.0979047	0.00241565
LOC5577888	AAEL013404	Down	-0.318554	0.113685	0.00559888
LOC5575274	AAEL011746	Down	-0.318684	0.0927774	0.00176723
LOC5568246	AAEL006685	Down	-0.320075	0.105295	0.00367676
LOC5564133	AAEL004088	Down	-0.321978	0.0539646	0.000225329
LOC5571752	AAEL009274	Down	-0.32332	0.10003	0.00143151
LOC5572512	AAEL009842	Down	-0.324887	0.0836295	0.000554731
LOC5578926	AAEL003746	Down	-0.326	0.100088	0.00217673
LOC5572735	AAEL010012	Down	-0.32725	0.0621343	0.000236256
LOC5565409	AAEL014847	Down	-0.327806	0.0948862	0.00200667
LOC5568054	AAEL006480	Down	-0.327889	0.102798	0.00241815
LOC5571296	AAEL001549	Down	-0.330768	0.10686	0.00345102
LOC5578267	AAEL003492	Down	-0.331648	0.0538715	0.000184413
LOC5577421	AAEL003151	Down	-0.333267	0.108599	0.00312353
LOC5578303	AAEL013613	Down	-0.334035	0.113984	0.00379924
LOC5568843	AAEL007162	Down	-0.336923	0.0577284	0.000135155
LOC5568526	AAEL006946	Down	-0.337083	0.0688951	0.000272801
LOC5578207	AAEL003462	Down	-0.337182	0.0722815	0.000446099
LOC5577284	AAEL013138	Down	-0.337862	0.117521	0.00559888
LOC5576835	AAEL012819	Down	-0.339375	0.0941406	0.0040111
LOC5572173	AAEL009590	Down	-0.339612	0.081763	0.000702983
LOC5569590	AAEL001247	Down	-0.339925	0.0712674	0.000645448
LOC5565270	AAEL004691	Down	-0.341261	0.0670993	0.000114001
LOC5579101	AAEL003842	Down	-0.344787	0.0833179	0.000873586
LOC5577042	AAEL012964	Down	-0.346854	0.0332026	7.11297e-05
LOC5574649	AAEL011293	Down	-0.347674	0.0887734	0.000513251
LOC5571907	AAEL009414	Down	-0.35018	0.0972927	0.00161236
LOC5572982	AAEL001930	Down	-0.35075	0.110619	0.00305194
LOC5574550		Down	-0.353676	0.0817469	0.00287172
LOC5575983	AAEL012233	Down	-0.355182	0.0566745	0.000233317
LOC5571828	AAEL001690	Down	-0.361298	0.0837337	0.00050498
LOC5569338	AAEL007546	Down	-0.365056	0.0550518	0.000135555
LOC5579263	AAEL011873	Down	-0.366511	0.0956827	0.000963828
LOC5571387	AAEL009026	Down	-0.366713	0.0585002	0.000170122
LOC5574458	AAEL011180	Down	-0.370408	0.0295027	5.4814e-05
LOC5571500	AAEL001623	Down	-0.370685	0.0466742	6.70562e-05
LOC5569514	AAEL007702	Down	-0.371742	0.0599214	0.00170283
LOC5573574	AAEL002118	Down	-0.372875	0.0864055	0.00058123
LOC5575273	AAEL011742	Down	-0.373196	0.0471638	5.49562e-05
LOC5571047	AAEL008768	Down	-0.373671	0.0830115	0.000342395
LOC5570433	AAEL019748	Down	-0.377625	0.0864875	0.000548681
LOC23687450	AAEL017030	Down	-0.379898	0.0614814	0.000137675
LOC5570871	AAEL019868	Down	-0.381956	0.0618738	0.000117834
LOC5579187	AAEL003873	Down	-0.383043	0.111824	0.00224735
LOC5572799	AAEL001904	Down	-0.385107	0.0906393	0.000498966
LOC5564185	AAEL014335	Down	-0.385645	0.0972884	0.000919457
LOC5563673	AAEL000541	Down	-0.385704	0.0646549	0.000387998
LOC5574109	AAEL002263	Down	-0.387153	0.0599513	0.000317309
LOC5574731	AAEL011371	Down	-0.388753	0.0578509	0.00029887
LOC23687501	AAEL017081	Down	-0.388759	0.0775396	0.00181333
LOC5574976	AAEL002501	Down	-0.388989	0.0933302	0.000776635
LOC5564053	AAEL004060	Down	-0.389407	0.0544193	6.50315e-05
LOC5571712	AAEL009244	Down	-0.389841	0.054748	0.000152069
LOC5577568	AAEL013279	Down	-0.390716	0.0600991	0.000216152
LOC5576468	AAEL002903	Down	-0.391568	0.0710782	0.00172492
LOC5579815	AAEL023500	Down	-0.393284	0.103599	0.000826063
LOC5568302	AAEL006741	Down	-0.393846	0.0546336	1.4627e-05
LOC5572010	AAEL009476	Down	-0.394334	0.0922931	0.000708271
LOC110675493	AAEL028043	Down	-0.394347	0.0132711	0.000120541
LOC5571150	AAEL008848	Down	-0.39482	0.0634236	0.000198074
LOC5564091	AAEL028021	Down	-0.3959	0.0725775	0.000116866
LOC5576170	AAEL012359	Down	-0.397887	0.0415057	1.3981e-05
LOC5568255	AAEL006704	Down	-0.398876	0.0975657	0.000571867
LOC5566684	AAEL005567	Down	-0.399237	0.0559746	5.09417e-06
LOC5578146	AAEL013527	Down	-0.400111	0.0734714	0.000454818
LOC5576217	AAEL029007	Down	-0.400306	0.107336	0.00187136
LOC5569438	AAEL001236	Down	-0.400449	0.112484	0.00109298
LOC5571789	AAEL009317	Down	-0.400711	0.0874347	0.000450888
LOC5579795	AAEL003957	Down	-0.40488	0.0366062	1.19623e-05
LOC5578831	AAEL013875	Down	-0.405953	0.0321718	0.000111595
LOC5569700	AAEL007845	Down	-0.411562	0.0777571	0.000252388
LOC5574706	AAEL011347	Down	-0.413015	0.114486	0.00186384
LOC5574783	AAEL011414	Down	-0.416234	0.046139	8.52908e-05
LOC5575848	AAEL012113	Down	-0.423176	0.067773	0.000130475
LOC5569050	AAEL007349	Down	-0.423609	0.0546153	0.000142887
LOC5564278	AAEL014379	Down	-0.424531	0.110752	0.00126303
LOC5564781	AAEL004419	Down	-0.425307	0.0926919	0.000385448
LOC5575338	AAEL002615	Down	-0.433289	0.0823066	0.000360191
LOC5565105	AAEL004592	Down	-0.434571	0.094441	0.000269197
LOC5569670	AAEL007824	Down	-0.435031	0.0121861	5.33096e-05
LOC5572208	AAEL009606	Down	-0.435519	0.10918	0.000830923
LOC5569466	AAEL007662	Down	-0.438699	0.0813944	0.00029004
LOC5576124	AAEL002811	Down	-0.439782	0.071302	0.000162133
LOC5569598	AAEL021578	Down	-0.442792	0.103473	0.000605296
LOC5573249	AAEL010340	Down	-0.443719	0.0912877	0.000196093
LOC5566942	AAEL005535	Down	-0.448811	0.0898523	0.000384074
LOC5566977	AAEL005739	Down	-0.449899	0.072249	8.082e-05
LOC5576914	AAEL012865	Down	-0.450409	0.107617	0.00088729
LOC5574677	AAEL011319	Down	-0.45061	0.0993322	0.000386667
LOC5565108	AAEL004586	Down	-0.451073	0.0932	0.000321222
LOC5574526	AAEL011197	Down	-0.452284	0.0187322	8.83101e-05
LOC5565836	AAEL005017	Down	-0.454323	0.0962043	0.000247232
LOC5565652	AAEL004902	Down	-0.455445	0.111118	0.000661917
LOC5567091	AAEL012313	Down	-0.456237	0.0876321	0.00164549
LOC5575813	AAEL012069	Down	-0.457566	0.075716	8.15625e-05
LOC5564056	AAEL004059	Down	-0.458663	0.0384955	9.31763e-06
LOC5570924	AAEL026751	Down	-0.461115	0.102354	0.000672483
LOC5563904	AAEL003993	Down	-0.461191	0.089337	0.000138295
LOC5567214	AAEL028205	Down	-0.461204	0.0532431	6.58078e-06
LOC5572672	AAEL001852	Down	-0.463508	0.0557483	8.3141e-05
CFI06_mgp12	-	Down	-0.468126	0.015702	8.15382e-05
CFI06_mgp11	-	Down	-0.469464	0.0186371	0.000144182
LOC5568504	AAEL006921	Down	-0.47464	0.0822604	0.000260865
LOC23687516	AAEL017096	Down	-0.47609	0.0111317	5.35363e-05
LOC5568430	AAEL006833	Down	-0.476568	0.0723531	7.95622e-05
LOC5564399	AAEL004227	Down	-0.479256	0.100678	0.000451448
LOC5571262	AAEL001569	Down	-0.481512	0.0903524	0.000371296
LOC5571453	AAEL009074	Down	-0.482299	0.0663316	7.90408e-05
LOC5573256	AAEL010338	Down	-0.48304	0.0887178	0.000234346
LOC5577591	AAEL020476	Down	-0.484602	0.102381	0.00023593
LOC5564768	AAEL004434	Down	-0.487433	0.0476243	1.57372e-05
LOC5575715	AAEL012026	Down	-0.48953	0.0460959	5.40953e-06
LOC5577719	AAEL013353	Down	-0.490154	0.0369217	0.000233434
LOC5578684	AAEL003645	Down	-0.496967	0.0473536	2.79197e-05
LOC5566864	AAEL000847	Down	-0.500188	0.101408	0.000298832
LOC5571506	AAEL019988	Down	-0.501479	0.0973784	0.000430721
LOC5566079	AAEL015064	Down	-0.504157	0.0562553	3.56548e-05
LOC5567495	AAEL000934	Down	-0.509603	0.103504	0.000290429
LOC5576244	AAEL002851	Down	-0.510374	0.0350989	8.30455e-06
LOC5564337		Down	-0.513216	0.0888422	1.85071e-05
LOC5577073	AAEL019939	Down	-0.515999	0.0903376	0.000209185
LOC5567559	AAEL006158	Down	-0.519823	0.0467307	1.59506e-05
LOC5564259	AAEL022285	Down	-0.520463	0.0369044	2.52507e-06
LOC5573994	AAEL010843	Down	-0.52072	0.0430606	1.93333e-05
LOC5565060	AAEL025769	Down	-0.522984	0.0896286	0.000309563
CFI06_mgp02	-	Down	-0.527972	0.0210848	1.06368e-05
LOC5564931	AAEL004503	Down	-0.531483	0.0184136	6.65156e-09
LOC5579467	AAEL023603	Down	-0.536745	0.0858726	0.000162813
CFI06_mgp08	-	Down	-0.537523	0.0163276	6.12389e-05
LOC5565453	AAEL000667	Down	-0.537646	0.120496	0.00098345
LOC5578459	AAEL000486	Down	-0.538306	0.0611004	0.000124315
LOC23687815	AAEL017395	Down	-0.538582	0.0888156	0.000120281
LOC5568211	AAEL006642	Down	-0.539732	0.0318891	2.84306e-05
LOC5569606	AAEL001261	Down	-0.540325	0.0692034	1.81538e-05
LOC5575278	AAEL011741	Down	-0.547906	0.0486233	2.93576e-05
LOC5568254	AAEL006702	Down	-0.549938	0.0918305	0.00158962
LOC5566143	AAEL005213	Down	-0.550429	0.0590628	4.25943e-05
LOC5568253	AAEL006699	Down	-0.554206	0.103218	0.000175528
LOC5570219	AAEL024456	Down	-0.557618	0.0701567	0.000115434
LOC5566301	AAEL005293	Down	-0.567653	0.0819219	0.000161069
LOC5576841	AAEL012827	Down	-0.567871	0.0970241	0.000229154
LOC5566687	AAEL005558	Down	-0.578706	0.0507626	2.91666e-05
LOC5573863	AAEL010765	Down	-0.585015	0.047134	3.3183e-05
LOC5574806	AAEL002467	Down	-0.586029	0.0913193	0.000119813
LOC5579043	AAEL013987	Down	-0.587371	0.0480266	0.000319834
LOC5565405	AAEL014843	Down	-0.590332	0.045338	6.06998e-06
LOC5574701	AAEL027910	Down	-0.59582	0.0838123	0.00018373
LOC5571275	AAEL001577	Down	-0.599447	0.110029	0.000209155
LOC5570622	AAEL008428	Down	-0.608284	0.0453353	4.72202e-05
LOC5565095	AAEL004589	Down	-0.614538	0.0371902	8.05991e-07
CFI06_mgp07	-	Down	-0.616459	0.0499085	8.95419e-06
LOC110677685	AAEL023769	Down	-0.621766	0.0734973	0.00019248
LOC5563589	AAEL000090	Down	-0.624814	0.103809	0.000378499
LOC5571418	AAEL009059	Down	-0.630555	0.0969534	0.000277399
LOC5580331	AAEL013074	Down	-0.634926	0.0870583	0.00011148
LOC110679583	AAEL023591	Down	-0.634939	0.0628928	1.94275e-05
LOC5569427	AAEL007624	Down	-0.635407	0.1029	0.0002428
LOC5574240	AAEL011007	Down	-0.643291	0.0813355	7.34961e-05
LOC5568503	AAEL006922	Down	-0.644032	0.0834677	9.5334e-05
LOC5569575	AAEL007765	Down	-0.651049	0.0547378	7.07121e-06
LOC5579045	AAEL013980	Down	-0.657024	0.0851894	8.18787e-05
LOC5566316	AAEL005305	Down	-0.658449	0.0738107	4.49927e-05
LOC5578619	AAEL003590	Down	-0.665189	0.0815453	7.87864e-05
LOC5570054	AAEL000186	Down	-0.666049	0.10405	0.000277995
LOC5567769	AAEL000102	Down	-0.670496	0.0730422	1.77928e-05
LOC5577227	AAEL003130	Down	-0.671248	0.0879846	5.19633e-05
LOC5572891	AAEL010099	Down	-0.671357	0.098751	0.0001261
LOC5578156	AAEL013536	Down	-0.672437	0.058072	3.30653e-05
LOC5579951	AAEL006786	Down	-0.672439	0.0765376	1.54068e-05
LOC5570780	AAEL008543	Down	-0.677897	0.084475	5.38276e-05
LOC5564821	AAEL000626	Down	-0.678174	0.0877583	3.33632e-05
LOC5571226	AAEL008921	Down	-0.680935	0.0475715	5.76744e-06
LOC5579108	AAEL003844	Down	-0.683705	0.0717049	4.40675e-06
LOC5569637	AAEL007778	Down	-0.687165	0.0853529	0.00115419
LOC5573851	AAEL010777	Down	-0.688456	0.0489157	0.00031946
LOC5579095	AAEL003857	Down	-0.688959	0.088307	8.17118e-05
LOC5573312	AAEL010416	Down	-0.690191	0.100519	8.05377e-05
LOC5577268	AAEL013128	Down	-0.6932	0.0967179	8.55943e-05
LOC5569288	AAEL007547	Down	-0.710186	0.0899595	2.71635e-05
CFI06_mgp01	-	Down	-0.715124	0.0565742	2.19212e-05
CFI06_mgp09	-	Down	-0.722768	0.0252955	1.43612e-07
LOC5572793	AAEL001906	Down	-0.724488	0.0956475	0.000788567
LOC5572257	AAEL009680	Down	-0.732719	0.0777664	3.48364e-05
LOC5572129	AAEL026603	Down	-0.733363	0.0802233	4.81629e-05
LOC5577489	AAEL013229	Down	-0.73771	0.0491333	2.26282e-06
LOC5571093	AAEL008801	Down	-0.741481	0.0543607	0.000334434
LOC5569183	AAEL007439	Down	-0.746448	0.0553565	1.17241e-06
LOC5564117	AAEL019408	Down	-0.747663	0.0754406	5.18402e-05
LOC5570080	AAEL001336	Down	-0.752813	0.0976466	5.05542e-05
LOC5576270	AAEL012421	Down	-0.769147	0.0941948	6.46761e-05
LOC5568600	AAEL001102	Down	-0.771336	0.100056	0.000151291
LOC5565048	AAEL004567	Down	-0.779026	0.0758795	0.000147681
LOC5566457	AAEL005428	Down	-0.779979	0.0567225	7.37709e-06
LOC5575615	AAEL019860	Down	-0.781663	0.0785817	2.75199e-05
LOC5577316	AAEL013163	Down	-0.784631	0.0748675	3.31828e-05
LOC5578266	AAEL003505	Down	-0.789403	0.0334743	5.9848e-05
LOC5571825	AAEL001698	Down	-0.796967	0.0787831	8.42379e-05
LOC5575085	AAEL011641	Down	-0.79765	0.0468894	2.91041e-06
LOC5580019	AAEL009645	Down	-0.823489	0.045292	5.12611e-07
LOC5574634	AAEL020739	Down	-0.835659	0.0854274	3.56416e-05
LOC5578090	AAEL003415	Down	-0.836338	0.0933753	2.77651e-05
LOC5565891	AAEL000706	Down	-0.839761	0.0702983	9.1027e-06
LOC5564477	AAEL014484	Down	-0.845544	0.0872595	6.27875e-07
LOC5574614	AAEL011248	Down	-0.866577	0.0933515	4.31284e-05
LOC5569048	AAEL007344	Down	-0.923317	0.0907038	4.36993e-05
CFI06_mgr02	-	Down	-0.923788	0.0122641	2.6705e-05
LOC5568292	AAEL006721	Down	-0.925309	0.0911987	7.73669e-05
LOC5566800	AAEL005651	Down	-0.934846	0.0596918	4.83825e-06
LOC5571461	AAEL009092	Down	-0.942385	0.0808001	2.46903e-05
LOC5579871	AAEL005985	Down	-0.957536	0.0671299	8.34204e-06
LOC5568403	AAEL006820	Down	-0.963676	0.0432825	6.32189e-07
LOC5573328	AAEL010411	Down	-0.965359	0.0556253	4.26931e-06
LOC5576348	AAEL002861	Down	-0.971978	0.094291	5.59533e-06
LOC5575831	AAEL012099	Down	-1.01151	0.0604255	4.93006e-06
LOC5574667	AAEL011302	Down	-1.01657	0.0450331	1.84279e-06
LOC110678443	AAEL027700	Down	-1.04128	0.0938492	2.26928e-05
LOC110675610	AAEL026008	Down	-1.04709	0.0240176	4.47049e-05
CFI06_mgr01	-	Down	-1.066	0.0560319	1.11073e-06
CFI06_mgp03	-	Down	-1.06967	0.051814	7.22323e-07
LOC5565460	AAEL026741	Down	-1.07079	0.0908078	3.90623e-05
LOC110675611	AAEL026833	Down	-1.08013	0.0558032	6.11383e-06
LOC5573583	AAEL002130	Down	-1.08144	0.0654454	6.88943e-06
LOC5565839	AAEL005027	Down	-1.09595	0.0779118	1.65268e-06
LOC5574376	AAEL018211	Down	-1.10827	0.07944	4.06801e-06
LOC5576488	AAEL002900	Down	-1.12436	0.0842939	2.54901e-05
LOC5578506	AAEL023729	Down	-1.22131	0.095521	1.30491e-05
CFI06_mgp06	-	Down	-1.24252	0.0564092	1.14199e-06
LOC110678629	AAEL028247	Down	-1.27955	0.0555097	2.62083e-07
LOC5564196	AAEL014348	Down	-1.29369	0.0619154	5.56245e-07
LOC5566824	AAEL022609	Down	-1.31588	0.0601519	1.5602e-07
CFI06_mgp13	-	Down	-1.33469	0.0548955	1.39948e-07
LOC5570461	AAEL008356	Down	-1.39027	0.0780245	9.23493e-08
LOC5576330	AAEL019728	Down	-1.41703	0.0590616	3.80084e-07
LOC5577480	AAEL024613	Down	-1.44975	0.0825048	4.88134e-06
CFI06_mgp05	-	Down	-1.49537	0.0522058	9.4134e-07
LOC5572513	AAEL009850	Down	-1.57227	0.0619009	0.000174811
LOC110675128	AAEL026302	Down	-1.5893	0.0329939	1.67134e-05
LOC5571127	AAEL019751	Down	-1.5905	0.0807806	1.68026e-05
LOC5570678	AAEL008473	Down	-1.60402	0.0954154	1.88454e-06
LOC110675609	AAEL021795	Down	-1.6185	0.0390162	1.61189e-07
LOC5575550	AAEL002661	Down	-1.65522	0.0644633	5.52491e-07
LOC110677665	AAEL010932	Down	-1.85906	0.0794567	8.81654e-06
LOC5566497		Down	-2.17995	0.0307678	2.64441e-08

## Sheet: ISC_EB-prol
gene	VectorBase_ID	Regulation	de_coef	de_se	de_pval
LOC5578455	AAEL000500	Up	1.32872	0.248084	0.000311727
LOC5568656	-	Up	1.23027	0.149507	5.65917e-05
LOC5571775	AAEL009291	Up	1.15901	0.200142	0.000510857
LOC5573287	AAEL010366	Up	0.950083	0.18767	0.00115258
LOC110676297	AAEL027453	Up	0.890161	0.173049	0.000510146
LOC5578307	AAEL013628	Up	0.846693	0.0803244	0.000163883
LOC5573855	AAEL010776	Up	0.836752	0.129899	0.000128337
LOC5570465	AAEL026904	Up	0.763769	0.0250761	3.35961e-07
LOC5577193	AAEL013075	Up	0.754044	0.152291	0.000742719
LOC23687857	AAEL017437	Up	0.721435	0.107271	0.000176091
LOC5571053	AAEL008769	Up	0.706154	0.121996	0.000274062
LOC5564567	AAEL014516	Up	0.695277	0.0719121	4.67699e-06
LOC5565804	AAEL005008	Up	0.660081	0.163039	0.00119483
LOC5576801	AAEL012778	Up	0.654326	0.174426	0.00193007
LOC5566484	AAEL005401	Up	0.64384	0.0730774	3.36478e-05
LOC5575279	AAEL014896	Up	0.642798	0.168639	0.00182051
LOC5571997	AAEL009487	Up	0.638934	0.125106	0.000387568
LOC5574993	AAEL002534	Up	0.638341	0.0288622	3.49912e-06
LOC5570211	AAEL019828	Up	0.63236	0.190682	0.00279944
LOC5565657	AAEL004914	Up	0.619589	0.161391	0.00155634
LOC5572655	AAEL001837	Up	0.606559	0.182821	0.00259948
LOC5567470	AAEL000947	Up	0.604902	0.181454	0.00326318
LOC5569780	AAEL007926	Up	0.590726	0.142207	0.00134937
LOC5575512	AAEL011881	Up	0.575787	0.154847	0.00200351
LOC5577765	AAEL003309	Up	0.56974	0.136583	0.00112787
LOC5577377	AAEL000428	Up	0.566168	0.155859	0.00174553
LOC5565801	AAEL005001	Up	0.55326	0.15649	0.0024529
LOC5571803	AAEL009330	Up	0.54483	0.0787694	0.00015886
LOC5575846	AAEL012119	Up	0.541234	0.153387	0.00228024
LOC5577761	AAEL003298	Up	0.540272	0.126995	0.000709863
LOC110675613	AAEL021473	Up	0.534983	0.171306	0.00419916
LOC5569222	AAEL007494	Up	0.534386	0.0969727	0.000486933
LOC110676293	AAEL003723	Up	0.531432	0.079004	0.000258271
LOC5575611	AAEL027674	Up	0.526452	0.164713	0.00279944
LOC5570883	AAEL008658	Up	0.51742	0.105892	0.00036413
LOC110674016	AAEL022632	Up	0.517166	0.176623	0.00539892
LOC5575931	AAEL012161	Up	0.508028	0.177192	0.004999
LOC110678029	AAEL021557	Up	0.500984	0.112089	0.000822058
LOC5569739	AAEL007881	Up	0.499327	0.134403	0.0017027
LOC5573778	AAEL000293	Up	0.494313	0.153661	0.00259948
LOC5568916	AAEL019536	Up	0.486586	0.163162	0.004999
LOC5563910	AAEL003986	Up	0.485815	0.165726	0.00479904
LOC5573532	AAEL010558	Up	0.483469	0.0725163	0.00014089
LOC5565025	AAEL014702	Up	0.477924	0.14544	0.00419916
LOC5567109	AAEL005832	Up	0.466603	0.0965331	0.000436704
LOC5580011	AAEL009634	Up	0.466375	0.176785	0.0121976
LOC5567950	AAEL006390	Up	0.46364	0.155234	0.00459908
LOC5571437	AAEL009070	Up	0.455267	0.186784	0.0221956
LOC23687671	AAEL017251	Up	0.450918	0.187911	0.0221956
LOC5568487	AAEL006902	Up	0.450114	0.125197	0.00182776
LOC5564226	-	Up	0.439248	0.0194103	3.71523e-06
LOC5567284	AAEL021583	Up	0.433816	0.172497	0.0171966
LOC5574388	AAEL011105	Up	0.420654	0.159785	0.010198
LOC5578857	AAEL027402	Up	0.420055	0.0600643	0.00016423
LOC5573200	AAEL001998	Up	0.419582	0.13378	0.00239952
LOC5576631	AAEL019597	Up	0.419152	0.198363	0.0437912
LOC5566219	AAEL005255	Up	0.409608	0.135694	0.0039992
LOC5568583	AAEL001113	Up	0.407674	0.110423	0.00113274
LOC5579654	AAEL003970	Up	0.404739	0.0929109	0.000783254
LOC5579094	AAEL003832	Up	0.400198	0.18425	0.0359928
LOC5578833	AAEL013876	Up	0.397083	0.105765	0.00145001
LOC5567927	AAEL006372	Up	0.396173	0.159761	0.0123975
LOC5578022	AAEL003373	Up	0.392296	0.186092	0.0379924
LOC5574484	AAEL002401	Up	0.390814	0.142984	0.0079984
LOC110673978	AAEL006000	Up	0.390187	0.187914	0.0471906
LOC5578270	AAEL008639	Up	0.386687	0.186524	0.0437912
LOC110678469	AAEL027771	Up	0.383431	0.14219	0.00679864
LOC5566251	AAEL015110	Up	0.378426	0.141294	0.00879824
LOC110676831	-	Up	0.378116	0.0956569	0.000809311
LOC5569925	AAEL027654	Up	0.378035	0.100176	0.00180368
LOC5567423	AAEL006070	Up	0.375173	0.15731	0.0191962
LOC5573536	AAEL010576	Up	0.374343	0.100239	0.00127242
LOC5578532	AAEL013739	Up	0.37275	0.125127	0.00359928
LOC5575041	AAEL011588	Up	0.370445	0.143848	0.0131974
LOC5566322	AAEL005289	Up	0.370289	0.128431	0.00519896
LOC5576502	AAEL012553	Up	0.368546	0.180296	0.0445911
LOC5565637	AAEL014915	Up	0.367216	0.184581	0.0463907
LOC5578343	AAEL003514	Up	0.367153	0.136411	0.0105979
LOC5580311	AAEL003014	Up	0.361541	0.164504	0.030194
LOC5573818	AAEL010738	Up	0.359845	0.161418	0.029794
LOC5571429	AAEL009066	Up	0.359078	0.0999581	0.00114732
LOC5572532	AAEL009863	Up	0.355038	0.109049	0.00348033
LOC5565300	AAEL028037	Up	0.354196	0.168237	0.0427914
LOC5564724	AAEL004404	Up	0.354077	0.135843	0.00979804
LOC5567277	AAEL020992	Up	0.351086	0.166543	0.039792
LOC5570686	AAEL008500	Up	0.349223	0.114298	0.00359928
LOC5563827	AAEL014161	Up	0.348535	0.162105	0.0391922
LOC5571265	AAEL001588	Up	0.347319	0.1532	0.0235953
LOC110677919	AAEL020749	Up	0.342661	0.0170812	6.30901e-07
LOC5579480	AAEL015314	Up	0.341426	0.169095	0.0441912
LOC5568862	AAEL007160	Up	0.341397	0.161837	0.040192
LOC5566137	AAEL005190	Up	0.340959	0.153383	0.0315937
LOC5572968	AAEL010168	Up	0.337545	0.0176305	0.00018587
LOC5571039	AAEL008784	Up	0.335186	0.0785352	0.000522837
LOC5573492	AAEL010538	Up	0.333388	0.141788	0.0221956
LOC5574385	AAEL011090	Up	0.332022	0.149404	0.0271946
LOC5568538	AAEL006956	Up	0.33181	0.159947	0.0495901
LOC5572836	AAEL010065	Up	0.330489	0.135506	0.0175965
LOC23687788	AAEL017368	Up	0.32945	0.151842	0.0319936
LOC5570432	AAEL008329	Up	0.328992	0.0166922	7.89873e-06
LOC5569122	AAEL007383	Up	0.327116	0.0568884	0.000154334
LOC5576010	AAEL012238	Up	0.323453	0.146383	0.0295941
LOC5568987	AAEL007289	Up	0.320262	0.158308	0.0479904
LOC5579836	AAEL005868	Up	0.319596	0.113405	0.00679864
LOC5571687	AAEL009212	Up	0.316733	0.134034	0.0183963
LOC5579206	AAEL019700	Up	0.315417	0.146329	0.0357928
LOC5568602	AAEL001103	Up	0.312819	0.136068	0.025195
LOC5568717	AAEL007043	Up	0.311936	0.113578	0.00839832
LOC5569531	AAEL007715	Up	0.311305	0.0153941	0.000162606
LOC5566474	AAEL005400	Up	0.310063	0.0932375	0.00210919
LOC5571304	AAEL008953	Up	0.310016	0.0478038	1.58892e-05
LOC5575687	AAEL013713	Up	0.302408	0.123645	0.0167966
LOC23687442	AAEL017022	Up	0.298565	0.0562843	7.24681e-05
LOC5575790	AAEL012062	Up	0.297265	0.0557683	0.000445312
LOC5572634	AAEL001863	Up	0.296285	0.0546899	8.63823e-05
LOC5566654	AAEL005508	Up	0.295977	0.143957	0.0413917
LOC5578184	AAEL003469	Up	0.292771	0.133696	0.0323935
LOC5571844	AAEL001703	Up	0.291027	0.0513766	0.000210608
LOC5565156	AAEL004616	Up	0.290971	0.108871	0.00819836
LOC23687632	AAEL017212	Up	0.289402	0.067305	0.0006955
LOC23687573	AAEL028188	Up	0.288868	0.140592	0.0425915
LOC5564544	AAEL004319	Up	0.287871	0.112747	0.0117976
LOC5567031	AAEL005766	Up	0.283918	0.0591153	0.00060145
LOC110674237	AAEL026466	Up	0.283879	0.0738794	0.00318414
LOC5577626	AAEL003210	Up	0.28324	0.127384	0.0275945
LOC5572725	AAEL009994	Up	0.280686	0.0213961	1.54225e-05
LOC5573858	AAEL010782	Up	0.279597	0.106717	0.010198
LOC5570108	AAEL020238	Up	0.276824	0.0189243	1.34243e-05
LOC5575534	AAEL011910	Up	0.274761	0.129684	0.0369926
LOC5569074	AAEL001210	Up	0.272659	0.107343	0.0127974
LOC5563839	AAEL024195	Up	0.272468	0.100715	0.00859828
LOC110678198		Up	0.270409	0.125213	0.0363927
LOC5571932	AAEL009387	Up	0.265463	0.0958615	0.00639872
LOC5578966	AAEL013950	Up	0.265112	0.134338	0.0439912
LOC5567636	AAEL024235	Up	0.259037	0.105206	0.0131974
LOC5575162	AAEL000328	Up	0.256134	0.119093	0.0365927
LOC5571937	AAEL009422	Up	0.255644	0.0697976	0.0019205
LOC5571450	AAEL009078	Up	0.255368	0.0973087	0.0103979
LOC5573990	AAEL010840	Up	0.25273	0.101518	0.015197
LOC5567454	AAEL000944	Up	0.251209	0.104502	0.019796
LOC110681498	AAEL023347	Up	0.244766	0.116459	0.0361928
LOC5578505	AAEL013703	Up	0.244493	0.0609122	0.00102522
LOC5566220	AAEL005270	Up	0.24337	0.0615698	0.00110453
LOC5570455	AAEL008341	Up	0.241888	0.094377	0.0127974
LOC5580036	AAEL010230	Up	0.240317	0.0907031	0.00979804
LOC5573370	AAEL010470	Up	0.238788	0.110301	0.0289942
LOC5565400	AAEL004783	Up	0.236442	0.0541451	0.00091602
LOC5569529	AAEL007699	Up	0.23463	0.0154942	0.000239426
LOC5580192	AAEL002551	Up	0.230125	0.0821407	0.00539892
LOC5567396	AAEL006053	Up	0.223494	0.0638416	0.00187575
LOC5580329	AAEL013069	Up	0.22263	0.0229369	3.65411e-05
LOC5579820	AAEL005524	Up	0.219201	0.0824914	0.00819836
LOC5580030	AAEL009653	Up	0.211516	0.016549	0.000376883
LOC5571208	AAEL008893	Up	0.208102	0.083731	0.0165967
LOC5577309	AAEL013158	Up	0.203502	0.0420008	0.000352291
LOC5575105	AAEL011656	Up	0.19965	0.0169015	0.000460223
LOC5565700	AAEL004930	Up	0.19305	0.0787383	0.0131974
LOC5578793	AAEL003676	Up	0.189017	0.0621152	0.00339932
LOC5571955	AAEL026633	Up	0.187423	0.08646	0.0367926
LOC5564556	AAEL004325	Up	0.184252	0.0199304	0.000114619
LOC23687936	AAEL017516	Up	0.179526	0.016628	0.000451511
LOC5566236	AAEL005269	Up	0.169076	0.0545501	0.00295095
LOC5574167	AAEL010977	Up	0.165889	0.0337626	0.000307157
LOC5578313	AAEL013625	Up	0.165569	0.0187045	2.43377e-06
LOC5576353	AAEL002881	Up	0.163829	0.0506534	0.00303918
LOC5566843	AAEL000823	Up	0.158562	0.0154644	4.66645e-06
LOC23687404	AAEL016984	Up	0.156044	0.0477145	0.00191161
LOC5572534	AAEL009859	Up	0.154674	0.0378723	0.000747638
LOC5570050	AAEL000185	Up	0.151974	0.0726531	0.0337932
LOC5567163	AAEL005901	Up	0.150846	0.0192415	6.37277e-05
LOC5566092	AAEL005170	Up	0.148605	0.0524596	0.00419916
LOC5576221	AAEL002833	Up	0.144632	0.0661906	0.024795
LOC5565541	AAEL004829	Up	0.142044	0.0665658	0.0295941
LOC5572365	AAEL009747	Up	0.138665	0.0183672	0.000749073
LOC5570243	AAEL008192	Up	0.136093	0.0194046	0.000616338
LOC110677764	AAEL024434	Up	0.136	0.015478	7.58093e-05
LOC5576734	AAEL020340	Up	0.134282	0.0575782	0.0189962
LOC5578368	AAEL003530	Up	0.131958	0.0150313	0.00075247
LOC5563590	AAEL000032	Up	0.124025	0.017962	0.00083997
LOC5575718	AAEL012035	Up	0.123207	0.0630435	0.0413917
LOC5570675	AAEL008481	Up	0.120029	0.01516	0.000821944
LOC5574844	AAEL011447	Up	0.11892	0.0144651	0.000457787
LOC5573413	AAEL002047	Up	0.113893	0.0161803	0.000710321
LOC5576758	AAEL025553	Up	0.113303	0.0166484	0.000828683
LOC5569566	AAEL007752	Up	0.106229	0.0500582	0.0371926
LOC5576653	AAEL012686	Up	0.106201	0.0162439	0.000223872
LOC110676045	AAEL022286	Up	0.096403	0.0165801	8.84333e-05
LOC5565979	AAEL005097	Up	0.0931091	0.0187162	0.00158125
LOC5575037	AAEL011587	Up	0.0905808	0.01634	0.0012101
LOC5580259	AAEL012585	Up	0.0872875	0.0171158	0.00126065
LOC5572090	AAEL009496	Up	0.0844205	0.0186296	0.000473378
LOC5575450	AAEL002639	Up	0.0778776	0.0180627	0.00249581
LOC5577996	AAEL003396	Up	0.0763089	0.01502	0.00162311
LOC5566959	AAEL005722	Up	0.0711372	0.0156921	0.00202744
LOC5563786	AAEL003942	Up	0.0626795	0.0150311	0.00202548
LOC5577034	AAEL012944	Up	0.0558071	0.0154792	0.00410556
LOC5573217	AAEL010299	Up	0.0488387	0.0158634	0.0029994
LOC5571846	AAEL023681	Up	0.0450496	0.0164486	0.00619876
LOC110676232	AAEL023983	Up	0.0407337	0.0161877	0.014797
LOC5567070	AAEL005817	Up	0.0396337	0.0161069	0.0137972
LOC5573827	AAEL010756	Down	-0.0450431	0.015629	0.00359928
LOC5566522	AAEL005451	Down	-0.0515551	0.0144657	0.00386989
LOC5564921	AAEL004500	Down	-0.0550174	0.024533	0.0241952
LOC5570244	AAEL008188	Down	-0.0595188	0.0133548	0.00216811
LOC5578155	AAEL013533	Down	-0.0682781	0.0326573	0.039792
LOC5568260	AAEL006698	Down	-0.0720287	0.0158979	0.00151565
LOC5564212	AAEL004151	Down	-0.0767518	0.0183238	0.0020668
LOC5573211	AAEL010318	Down	-0.0810814	0.0275678	0.00379924
LOC23687495	AAEL017075	Down	-0.0884678	0.0396123	0.0225955
LOC5573763	AAEL000269	Down	-0.0911469	0.0294357	0.00358833
LOC5563592	AAEL000010	Down	-0.0976534	0.0185822	0.00181447
LOC110678734	AAEL019403	Down	-0.0985115	0.0191337	0.00119821
LOC5571927	AAEL020290	Down	-0.103129	0.0158617	0.00100558
LOC5566228	AAEL005266	Down	-0.10477	0.0163356	0.00116591
LOC5567341	AAEL006011	Down	-0.106596	0.0477653	0.0239952
LOC5574515	AAEL019717	Down	-0.108263	0.0318636	0.00188437
LOC5574404	AAEL011116	Down	-0.110643	0.0551828	0.0457908
LOC5564713	AAEL014583	Down	-0.111352	0.0131119	0.000518378
LOC5563646	AAEL021083	Down	-0.112595	0.013495	0.000708203
LOC5571609	AAEL009201	Down	-0.118362	0.0466349	0.00959808
LOC5573872	AAEL010787	Down	-0.122525	0.0281675	0.000673876
LOC5568471	AAEL006885	Down	-0.123397	0.0308313	0.00109897
LOC5571735	AAEL009257	Down	-0.12638	0.0556399	0.0223955
LOC5568303	AAEL006751	Down	-0.126515	0.0608817	0.0365927
LOC110677182	-	Down	-0.129524	0.0237987	0.000246184
LOC5566772	AAEL005629	Down	-0.129624	0.0143315	0.000717051
LOC5576215	AAEL002832	Down	-0.130762	0.0126136	0.00050893
LOC5571596	AAEL009185	Down	-0.133454	0.0613293	0.0269946
LOC5567839	AAEL001005	Down	-0.134097	0.0626668	0.0305939
LOC5564925	AAEL019568	Down	-0.134933	0.0298407	0.000749588
LOC5569124	AAEL007385	Down	-0.135794	0.0452478	0.00342485
LOC5575898	AAEL002737	Down	-0.137773	0.0494058	0.00759848
LOC5572931	AAEL010145	Down	-0.14233	0.063897	0.0259948
LOC5568465	AAEL006860	Down	-0.149603	0.018568	4.39061e-05
LOC5575492	AAEL011871	Down	-0.150585	0.0684437	0.0267946
LOC5567660	AAEL012740	Down	-0.151108	0.0246095	5.53583e-05
LOC5568436	AAEL012661	Down	-0.154365	0.047176	0.00249729
LOC5571466	AAEL009101	Down	-0.155388	0.0575176	0.00579884
LOC5579227	AAEL014064	Down	-0.158099	0.0665044	0.0179964
LOC5577723	AAEL013359	Down	-0.160136	0.0220929	6.32288e-05
LOC5564874	AAEL004460	Down	-0.160268	0.0633553	0.009998
LOC5577999	AAEL003393	Down	-0.167885	0.062428	0.00619876
LOC5572071	AAEL001715	Down	-0.168527	0.0679323	0.0117976
LOC5574190	AAEL002308	Down	-0.168572	0.0600944	0.00639872
LOC5569863	AAEL007945	Down	-0.169447	0.0431954	0.000987968
LOC5573418	AAEL002083	Down	-0.169469	0.045015	0.000634531
LOC5577061	AAEL003103	Down	-0.171771	0.066542	0.00679864
LOC5575914	AAEL012175	Down	-0.171849	0.0450306	0.00139101
LOC5571387	AAEL009026	Down	-0.175227	0.0738361	0.0139972
LOC5572753	AAEL010018	Down	-0.177126	0.0554309	0.00221783
LOC5565878	AAEL000679	Down	-0.177443	0.0818199	0.0311938
LOC5576440	AAEL005536	Down	-0.177929	0.0835665	0.0359928
LOC5573948	AAEL002183	Down	-0.179736	0.0922326	0.0475905
LOC5579199	AAEL014039	Down	-0.180153	0.051333	0.00162264
LOC5570335	AAEL019669	Down	-0.183297	0.04325	0.00268479
LOC5571571	AAEL009160	Down	-0.185498	0.0642021	0.00319936
LOC5572525	AAEL009844	Down	-0.185567	0.0860773	0.0259948
LOC5577910	AAEL003352	Down	-0.189112	0.0747423	0.0119976
LOC5578900	AAEL013904	Down	-0.189136	0.0906483	0.0365927
LOC5564860	AAEL004472	Down	-0.189139	0.089872	0.0329934
LOC5570784	AAEL022646	Down	-0.190619	0.0855242	0.024995
LOC5570653	AAEL008461	Down	-0.197249	0.0937247	0.0341932
LOC5564072	AAEL004067	Down	-0.197981	0.0983328	0.0417916
LOC5571544	AAEL009129	Down	-0.198224	0.0704254	0.00519896
LOC5578146	AAEL013527	Down	-0.199599	0.085821	0.0231954
LOC5574429	AAEL011157	Down	-0.200793	0.104975	0.0453909
LOC110676279	AAEL021140	Down	-0.203118	0.0391273	0.000414058
LOC5570913	AAEL001484	Down	-0.203345	0.0890525	0.0245951
LOC110679353	AAEL025697	Down	-0.205446	0.0836141	0.0125975
LOC5576046	AAEL014932	Down	-0.208553	0.0296159	6.8486e-05
LOC5572347	AAEL009733	Down	-0.20865	0.0844421	0.0133973
LOC5566977	AAEL005739	Down	-0.211365	0.0795456	0.00879824
LOC5578123	AAEL003427	Down	-0.212236	0.0131108	0.000256789
LOC5572285	AAEL001779	Down	-0.216004	0.096002	0.0225955
LOC5565931	AAEL025321	Down	-0.216431	0.080001	0.00579884
LOC23687839	AAEL017419	Down	-0.220485	0.0425791	0.000393327
LOC5578234	AAEL013571	Down	-0.221408	0.0798707	0.0039992
LOC5568054	AAEL006480	Down	-0.222198	0.107597	0.0345931
LOC5564792	AAEL004445	Down	-0.224322	0.113941	0.0425915
LOC5578382	AAEL013661	Down	-0.225244	0.040824	0.000128023
LOC5578431	AAEL000516	Down	-0.225424	0.101076	0.0253949
LOC5573879	AAEL010801	Down	-0.227054	0.0549021	0.000806025
LOC5571150	AAEL008848	Down	-0.227279	0.0707686	0.00372542
LOC5578927	AAEL003750	Down	-0.228306	0.0342122	2.68524e-05
LOC5565962	AAEL005220	Down	-0.228666	0.0184312	2.82811e-07
LOC5579810	AAEL005515	Down	-0.228836	0.0364535	4.54641e-05
LOC5571745	AAEL009275	Down	-0.22884	0.075137	0.00324284
LOC5575238	AAEL011708	Down	-0.229336	0.0666898	0.00180073
LOC5574706	AAEL011347	Down	-0.229358	0.116029	0.04999
LOC5564581	AAEL004347	Down	-0.229837	0.0966057	0.0177964
LOC5577499	AAEL003193	Down	-0.231862	0.0869681	0.00619876
LOC5564636	AAEL004378	Down	-0.234197	0.0545093	0.000401179
LOC5569181	AAEL007441	Down	-0.234262	0.0816949	0.00439912
LOC5569745	AAEL007883	Down	-0.234479	0.0510767	0.000575359
LOC5566847	AAEL000795	Down	-0.234549	0.0328216	0.000104832
LOC5569049	AAEL007342	Down	-0.235157	0.055104	0.000387989
LOC5569899	AAEL007990	Down	-0.236134	0.104067	0.0221956
LOC5576029	AAEL012262	Down	-0.236391	0.11928	0.0385923
LOC110678949	AAEL022104	Down	-0.237552	0.0822564	0.00359928
LOC110679171	AAEL009684	Down	-0.238693	0.102425	0.0203959
LOC5577178	AAEL013047	Down	-0.239292	0.106278	0.0243951
LOC5567491	AAEL000951	Down	-0.239475	0.0267516	1.39754e-05
LOC5567207	AAEL000902	Down	-0.241397	0.115604	0.0433913
LOC5570020	AAEL000182	Down	-0.241578	0.0760206	0.00319936
LOC5576950	AAEL012904	Down	-0.241986	0.104371	0.0187962
LOC5574383	AAEL011102	Down	-0.242249	0.0933814	0.00959808
LOC5579021	AAEL013960	Down	-0.24251	0.113811	0.0321936
LOC5571080	AAEL008787	Down	-0.246485	0.0930092	0.00739852
LOC5564041	AAEL004042	Down	-0.246502	0.0954049	0.00939812
LOC5574976	AAEL002501	Down	-0.246913	0.101023	0.0157968
LOC5571500	AAEL001623	Down	-0.247727	0.0562565	0.000412556
LOC5569338	AAEL007546	Down	-0.250046	0.0612183	0.000410712
LOC5579840	AAEL005843	Down	-0.250456	0.101649	0.0127974
LOC5575273	AAEL011742	Down	-0.253362	0.0630057	0.000562224
LOC5571930	AAEL009389	Down	-0.253801	0.0744447	0.00199949
LOC5571785	AAEL009313	Down	-0.255607	0.0410106	0.000166421
LOC5576744	AAEL024536	Down	-0.258084	0.0152664	0.000124092
LOC5565148	AAEL004620	Down	-0.258816	0.105645	0.0143971
LOC5578590	AAEL013774	Down	-0.259221	0.0832642	0.00295102
LOC5564399	AAEL004227	Down	-0.259856	0.104609	0.010198
LOC5564278	AAEL014379	Down	-0.260012	0.134517	0.0487902
LOC5568430	AAEL006833	Down	-0.260933	0.0733346	0.00203871
LOC5570930	AAEL008672	Down	-0.261598	0.101465	0.00859828
LOC5568843	AAEL007162	Down	-0.264016	0.0664287	0.000651844
LOC5568658	AAEL007001	Down	-0.264586	0.120008	0.0307938
LOC5580331	AAEL013074	Down	-0.264586	0.0986747	0.00819836
LOC5572929	AAEL010148	Down	-0.264804	0.12531	0.0359928
LOC5572512	AAEL009842	Down	-0.265966	0.0969634	0.00619876
LOC5577289	AAEL013139	Down	-0.266869	0.0534964	0.00058994
LOC5572335	AAEL009719	Down	-0.268113	0.133402	0.0407918
LOC5572799	AAEL001904	Down	-0.268597	0.1046	0.0111978
LOC5568633	AAEL007023	Down	-0.268874	0.079743	0.00130559
LOC5569166	AAEL007431	Down	-0.26909	0.096819	0.00559888
LOC5580100	AAEL002140	Down	-0.270222	0.105071	0.00879824
LOC5570994	AAEL008740	Down	-0.271099	0.129129	0.0303939
LOC5571296	AAEL001549	Down	-0.27155	0.119306	0.0223955
LOC5569050	AAEL007349	Down	-0.272576	0.0582948	0.00053765
LOC5576124	AAEL002811	Down	-0.274351	0.0996891	0.00519896
LOC5564185	AAEL014335	Down	-0.275102	0.104514	0.00679864
LOC5573751	AAEL000294	Down	-0.275278	0.0618519	0.000492128
LOC5571946	AAEL009430	Down	-0.275754	0.125554	0.0291942
LOC5573015	AAEL001916	Down	-0.276723	0.106143	0.00819836
LOC5573433	AAEL010486	Down	-0.277129	0.108074	0.0129974
LOC5565848	AAEL005038	Down	-0.278214	0.120186	0.0223955
LOC5564053	AAEL004060	Down	-0.278554	0.0619206	0.000449775
LOC5572696	AAEL009964	Down	-0.278599	0.0571921	0.000179391
LOC5577997	AAEL003385	Down	-0.278672	0.119827	0.0209958
LOC5568408	AAEL006829	Down	-0.280983	0.0860177	0.00286197
LOC5575274	AAEL011746	Down	-0.281681	0.0903699	0.00259948
LOC5565409	AAEL014847	Down	-0.282471	0.0910317	0.00259948
LOC5575813	AAEL012069	Down	-0.282925	0.0870911	0.00260162
LOC5570534	AAEL001421	Down	-0.283005	0.0984219	0.00359928
LOC5565702	AAEL014943	Down	-0.283179	0.0602639	0.000321723
LOC5569606	AAEL001261	Down	-0.284628	0.0785267	0.0011626
LOC5569632	AAEL007777	Down	-0.285056	0.0930678	0.00339932
LOC5569950	AAEL008039	Down	-0.285892	0.0567992	0.000375392
LOC5573744	AAEL019937	Down	-0.287886	0.07325	0.00119096
LOC110678855	AAEL025367	Down	-0.287893	0.0861112	0.0017134
LOC5576835	AAEL012819	Down	-0.287926	0.104041	0.00719856
LOC5564091	AAEL028021	Down	-0.28803	0.0806434	0.00157946
LOC5576765	AAEL012746	Down	-0.288501	0.0736778	0.00102613
LOC5573574	AAEL002118	Down	-0.289469	0.103027	0.00619876
LOC5577893	AAEL013407	Down	-0.289682	0.0925373	0.0027463
LOC5569180	AAEL007444	Down	-0.290691	0.028776	2.37667e-05
LOC5578801	AAEL003646	Down	-0.291812	0.1013	0.00479904
LOC5575980	AAEL012227	Down	-0.292516	0.12914	0.0231954
LOC5577423	AAEL003160	Down	-0.292711	0.0329907	5.05894e-05
LOC5571854	AAEL009345	Down	-0.29427	0.103622	0.0059988
LOC5575426	AAEL024454	Down	-0.294359	0.142052	0.0315937
LOC5569968	AAEL020092	Down	-0.294914	0.0516799	0.000107165
LOC5568801	AAEL001190	Down	-0.295248	0.14473	0.0381924
LOC5567637	AAEL006224	Down	-0.29542	0.137259	0.0319936
LOC5568680	AAEL007029	Down	-0.295664	0.129511	0.0225955
LOC5574089	AAEL002272	Down	-0.295695	0.146286	0.0389922
LOC5580315	AAEL012897	Down	-0.295855	0.122477	0.0181964
LOC5570433	AAEL019748	Down	-0.296121	0.10627	0.0059988
LOC5574649	AAEL011293	Down	-0.299418	0.103689	0.00339932
LOC5573407	AAEL002077	Down	-0.30176	0.132938	0.0259948
LOC5569762	AAEL025391	Down	-0.302159	0.087107	0.00209597
LOC5574592	AAEL002411	Down	-0.302527	0.0710905	0.000331619
LOC5574382	AAEL011099	Down	-0.302536	0.0794714	0.000747191
LOC5573952	AAEL002225	Down	-0.303063	0.154613	0.0459908
LOC5571227	AAEL008928	Down	-0.304537	0.122044	0.0129974
LOC5579467	AAEL023603	Down	-0.305514	0.115424	0.0089982
LOC5571712	AAEL009244	Down	-0.305559	0.0864076	0.00134584
LOC5570921	AAEL001495	Down	-0.306362	0.116378	0.0069986
LOC5574677	AAEL011319	Down	-0.308038	0.121576	0.0111978
LOC5569700	AAEL007845	Down	-0.309883	0.0850906	0.00158693
LOC5568659	AAEL007019	Down	-0.311464	0.0760507	0.000838114
LOC5568457	AAEL006854	Down	-0.312353	0.125399	0.0137972
LOC110676370	AAEL021600	Down	-0.312447	0.140678	0.0235953
LOC5576220	AAEL002834	Down	-0.312785	0.0664694	0.000226889
LOC5563880	AAEL014198	Down	-0.313635	0.137226	0.0191962
LOC5572464	AAEL001795	Down	-0.313648	0.158164	0.0431914
LOC5568526	AAEL006946	Down	-0.315058	0.0830286	0.00104434
LOC5574120	AAEL022600	Down	-0.315773	0.141635	0.0225955
LOC5568618	AAEL006977	Down	-0.316751	0.103117	0.00397154
LOC5564593	AAEL004327	Down	-0.317253	0.16212	0.04979
LOC5576097	AAEL002818	Down	-0.317795	0.158747	0.0459908
LOC5569279	AAEL007521	Down	-0.318196	0.142036	0.025195
LOC5580239	AAEL012326	Down	-0.318469	0.0412447	0.000127946
LOC5565589	AAEL004865	Down	-0.319719	0.0405826	0.000104912
LOC5568714	AAEL007042	Down	-0.320769	0.0754518	0.000749154
LOC5567559	AAEL006158	Down	-0.324241	0.0546644	0.000105069
LOC5572284	AAEL001759	Down	-0.325266	0.0154396	2.64599e-06
LOC5577568	AAEL013279	Down	-0.325782	0.0647011	0.000178015
LOC23687450	AAEL017030	Down	-0.326758	0.0691843	0.00133652
LOC5575848	AAEL012113	Down	-0.327722	0.0806867	0.00145909
LOC5566167	AAEL005238	Down	-0.32781	0.16638	0.04999
LOC5567068	AAEL005798	Down	-0.327999	0.165496	0.044991
LOC5572463	AAEL001798	Down	-0.328498	0.104461	0.00305737
LOC5576217	AAEL029007	Down	-0.328816	0.123881	0.00679864
LOC5574783	AAEL011414	Down	-0.329309	0.0911816	0.00170869
LOC5573065	AAEL014511	Down	-0.332297	0.0912276	0.00125123
LOC110679374	AAEL026843	Down	-0.333737	0.0802561	0.00099358
LOC5565105	AAEL004592	Down	-0.333896	0.107093	0.00337899
LOC5579041	AAEL013989	Down	-0.333945	0.0883986	0.00109465
LOC5570509	AAEL001432	Down	-0.335856	0.0751575	0.000528853
LOC5566366	AAEL020311	Down	-0.336524	0.166859	0.0391922
LOC5569522	AAEL007705	Down	-0.337335	0.12931	0.00859828
LOC5570780	AAEL008543	Down	-0.338291	0.0892626	0.000846528
LOC5573372	AAEL010467	Down	-0.339269	0.0803585	0.000758757
LOC5570837	AAEL018695	Down	-0.33932	0.174931	0.0457908
LOC5569466	AAEL007662	Down	-0.339924	0.0958161	0.00184732
LOC5569083	AAEL001209	Down	-0.340084	0.125321	0.00539892
LOC5574458	AAEL011180	Down	-0.340214	0.0394609	5.94078e-05
LOC5576914	AAEL012865	Down	-0.341622	0.12316	0.00639872
LOC23687646	AAEL017226	Down	-0.341675	0.128608	0.00779844
LOC5569520	AAEL007707	Down	-0.343935	0.0671772	0.000108593
LOC5567214	AAEL028205	Down	-0.345089	0.0633496	0.000193018
LOC5567073	AAEL005796	Down	-0.34641	0.158062	0.030194
LOC5569590	AAEL001247	Down	-0.347408	0.0847587	0.00117732
LOC5570501	AAEL001394	Down	-0.347869	0.161642	0.0285943
LOC110675810	AAEL009183	Down	-0.34874	0.142774	0.0177964
LOC5564259	AAEL022285	Down	-0.349015	0.0521155	6.03022e-05
LOC5574655	AAEL022570	Down	-0.350514	0.0646604	0.000195546
LOC110679868	AAEL027050	Down	-0.35128	0.0890416	0.00134327
LOC5573894	AAEL002184	Down	-0.351484	0.141481	0.0115977
LOC5574338	AAEL002334	Down	-0.351915	0.0537699	0.000132775
LOC5572224	AAEL009658	Down	-0.352022	0.169502	0.0371926
LOC5577042	AAEL012964	Down	-0.352115	0.0402096	8.79783e-05
LOC5565270	AAEL004691	Down	-0.353149	0.0770022	0.00048958
LOC5574526	AAEL011197	Down	-0.354327	0.0230463	7.28771e-07
LOC5566237	AAEL005276	Down	-0.35461	0.160696	0.025195
LOC5572735	AAEL010012	Down	-0.356108	0.0724627	0.000293234
LOC5570621	AAEL008422	Down	-0.35649	0.167811	0.0317936
LOC5569895	AAEL008006	Down	-0.356538	0.152794	0.0171966
LOC5579795	AAEL003957	Down	-0.357278	0.0429631	0.000853815
LOC5578495	AAEL002335	Down	-0.357504	0.132849	0.0079984
LOC5566651	AAEL005500	Down	-0.358042	0.154884	0.0183963
LOC23687501	AAEL017081	Down	-0.358146	0.0878594	0.000980979
LOC110674166	AAEL020485	Down	-0.359337	0.1356	0.00839832
LOC5568195	AAEL006619	Down	-0.360275	0.146251	0.0141972
LOC5576572	AAEL025570	Down	-0.361882	0.108949	0.00320453
LOC5564183	AAEL004121	Down	-0.362348	0.171709	0.0359928
LOC5563706	AAEL003921	Down	-0.365401	0.162824	0.0235953
LOC5575475	AAEL021703	Down	-0.365628	0.144757	0.0119976
LOC5578103	AAEL003430	Down	-0.365732	0.150818	0.015197
LOC5572195	AAEL014715	Down	-0.365758	0.0722638	0.000374219
LOC5566648	AAEL019466	Down	-0.366517	0.168732	0.0341932
LOC5578303	AAEL013613	Down	-0.367284	0.133181	0.00779844
LOC5578497	AAEL013702	Down	-0.367366	0.0797604	0.000314904
LOC5568814	AAEL001194	Down	-0.367642	0.131296	0.00879824
LOC5565050	AAEL004546	Down	-0.36777	0.155337	0.0203959
LOC5577888	AAEL013404	Down	-0.368256	0.128391	0.00419916
LOC5568246	AAEL006685	Down	-0.368657	0.12121	0.00379505
LOC5571789	AAEL009317	Down	-0.369256	0.0943259	0.000716404
LOC5567684	AAEL006251	Down	-0.374453	0.135492	0.00579884
LOC5573409	AAEL026571	Down	-0.374752	0.161192	0.0205959
LOC5571453	AAEL009074	Down	-0.376348	0.0715044	0.000206833
LOC5578267	AAEL003492	Down	-0.376649	0.0593095	0.000256607
LOC23687505	AAEL017085	Down	-0.377462	0.120885	0.00209363
LOC5570218	AAEL008153	Down	-0.380581	0.152068	0.0107978
LOC5574197	AAEL002296	Down	-0.383289	0.169256	0.0237952
LOC5577719	AAEL013353	Down	-0.383799	0.0452778	1.33555e-05
LOC5569514	AAEL007702	Down	-0.383945	0.068876	0.000244565
LOC5577555	AAEL013267	Down	-0.3856	0.17106	0.0209958
LOC5570951	AAEL008674	Down	-0.385861	0.153787	0.0141972
LOC110676221	AAEL026834	Down	-0.386104	0.145635	0.00819836
LOC5576414	AAEL012511	Down	-0.386337	0.108505	0.00145023
LOC5580095	AAEL002137	Down	-0.387412	0.129437	0.00319936
LOC5564924	AAEL023756	Down	-0.388203	0.114691	0.00172504
LOC5572949	AAEL010171	Down	-0.388691	0.160277	0.0183963
LOC5575108	AAEL011665	Down	-0.388741	0.124473	0.0039821
LOC5579472	AAEL007650	Down	-0.388857	0.087183	0.000157675
LOC110676310	AAEL022493	Down	-0.389009	0.0864764	0.000457295
LOC5578301	AAEL013620	Down	-0.38907	0.114822	0.00192596
LOC5566701	AAEL005593	Down	-0.38985	0.137812	0.00459908
LOC5578624	AAEL003597	Down	-0.390194	0.1545	0.0135973
LOC5571900	AAEL009377	Down	-0.390549	0.131042	0.00239952
LOC5579160	AAEL003883	Down	-0.392175	0.170112	0.0231954
LOC5569121	AAEL021748	Down	-0.392679	0.151447	0.0105979
LOC5563673	AAEL000541	Down	-0.392959	0.0781915	7.81853e-05
LOC110675493	AAEL028043	Down	-0.394164	0.017533	9.7353e-05
LOC5564056	AAEL004059	Down	-0.395052	0.0504653	0.000105888
LOC5568076	AAEL006520	Down	-0.396072	0.0875594	0.000652017
LOC5574502	AAEL002375	Down	-0.397669	0.128999	0.0029994
LOC5576470	AAEL002918	Down	-0.398681	0.145794	0.00619876
LOC5576468	AAEL002903	Down	-0.401613	0.0804302	0.000229151
LOC5576587	AAEL002933	Down	-0.404063	0.135412	0.0029994
LOC5566684	AAEL005567	Down	-0.406533	0.0697915	5.04647e-05
LOC5579851	AAEL005861	Down	-0.406549	0.127992	0.00290362
LOC5577649	AAEL003267	Down	-0.406549	0.118898	0.00169566
LOC5573437	AAEL010479	Down	-0.407014	0.181575	0.0213957
LOC5578684	AAEL003645	Down	-0.407248	0.052149	2.50288e-06
LOC5574496	AAEL002399	Down	-0.407557	0.112458	0.00134309
LOC5571664	AAEL024228	Down	-0.408443	0.130585	0.00295612
LOC5565955	AAEL005052	Down	-0.408894	0.147539	0.00639872
LOC5576764	AAEL012750	Down	-0.410431	0.112352	0.00146573
LOC5574109	AAEL002263	Down	-0.411873	0.102536	0.000724854
LOC5577675	AAEL013309	Down	-0.412346	0.166561	0.0129974
LOC5569670	AAEL007824	Down	-0.413454	0.0163224	1.57918e-06
LOC5573295	AAEL010382	Down	-0.414443	0.188431	0.0295941
LOC5580068	AAEL002163	Down	-0.416327	0.126744	0.00263179
LOC5572010	AAEL009476	Down	-0.417831	0.106905	0.00115961
LOC5575715	AAEL012026	Down	-0.419224	0.0506218	1.46588e-05
LOC5578831	AAEL013875	Down	-0.419268	0.0411086	4.18352e-05
LOC5571506	AAEL019988	Down	-0.419284	0.10021	0.000463458
LOC5572791	AAEL001896	Down	-0.419325	0.088206	0.000183036
LOC5565507	AAEL004809	Down	-0.419569	0.165944	0.0111978
LOC23687710	AAEL017290	Down	-0.419669	0.0915826	0.000572937
LOC5576244	AAEL002851	Down	-0.420314	0.0426985	1.24971e-05
LOC5580055	AAEL022806	Down	-0.421434	0.157277	0.00819836
LOC5577697	AAEL013334	Down	-0.422842	0.137009	0.00383768
LOC5573959	AAEL025216	Down	-0.424643	0.147275	0.0039992
LOC5568302	AAEL006741	Down	-0.425233	0.068878	8.9066e-05
LOC5578207	AAEL003462	Down	-0.425771	0.0822061	0.000359506
LOC5564828	AAEL025975	Down	-0.427573	0.176329	0.014997
LOC5570219	AAEL024456	Down	-0.428905	0.0896879	0.000176251
LOC110676001	AAEL020729	Down	-0.429094	0.195491	0.0255949
LOC5565060	AAEL025769	Down	-0.429837	0.089319	0.000633063
LOC5572173	AAEL009590	Down	-0.431242	0.0943233	0.000570594
LOC5578843	AAEL003731	Down	-0.432011	0.166096	0.00939812
LOC5565961	AAEL005048	Down	-0.434636	0.164027	0.00839832
LOC5574542	AAEL011216	Down	-0.434739	0.129188	0.00254578
LOC5578265	AAEL003493	Down	-0.434836	0.143397	0.00239952
LOC5572982	AAEL001930	Down	-0.434988	0.124826	0.00157828
LOC5566301	AAEL005293	Down	-0.437111	0.0996939	0.000451676
LOC5574731	AAEL011371	Down	-0.439711	0.0624252	6.39836e-05
LOC5577421	AAEL003151	Down	-0.441882	0.140506	0.00295728
LOC5572627	AAEL009946	Down	-0.44213	0.150218	0.00259948
LOC5579926	AAEL006795	Down	-0.442384	0.122847	0.00106617
LOC5567495	AAEL000934	Down	-0.44308	0.108157	0.000755648
LOC5569822	AAEL001312	Down	-0.443131	0.12075	0.001669
LOC5566751	AAEL015238	Down	-0.444944	0.0910933	0.000507724
LOC5572891	AAEL010099	Down	-0.446361	0.103161	0.000720296
LOC5577023	AAEL012939	Down	-0.446873	0.10386	0.000296
LOC5565405	AAEL014843	Down	-0.449507	0.0620264	0.000159206
LOC5568255	AAEL006704	Down	-0.450394	0.11381	0.00059211
LOC5570871	AAEL019868	Down	-0.451505	0.0704395	1.12356e-05
LOC5573249	AAEL010340	Down	-0.453015	0.0996095	0.000416519
LOC5564787	AAEL004435	Down	-0.453869	0.114586	0.000870487
LOC5566901	AAEL000854	Down	-0.456447	0.148668	0.00319936
LOC5565652	AAEL004902	Down	-0.457139	0.111938	0.000313028
LOC5566143	AAEL005213	Down	-0.459398	0.0713338	0.000147403
LOC5564133	AAEL004088	Down	-0.459697	0.0598357	2.98326e-05
LOC5566079	AAEL015064	Down	-0.461024	0.0670709	0.000241656
LOC5571141	AAEL019603	Down	-0.461544	0.165025	0.00459908
LOC5578031	AAEL013466	Down	-0.462309	0.168045	0.0069986
LOC5567091	AAEL012313	Down	-0.462323	0.0930928	0.000463049
LOC5564781	AAEL004419	Down	-0.466684	0.106842	0.000802922
LOC5574550		Down	-0.468659	0.0908974	0.00034641
LOC5575338	AAEL002615	Down	-0.469035	0.0932819	0.000167473
LOC5572994	AAEL001937	Down	-0.470361	0.121255	0.00145255
LOC5571414	AAEL009041	Down	-0.470569	0.164055	0.00539892
LOC5574806	AAEL002467	Down	-0.471225	0.120764	0.00106824
LOC5576472	AAEL002886	Down	-0.471551	0.0556537	3.98587e-05
LOC5575264	AAEL011718	Down	-0.471918	0.128348	0.00202712
LOC5568504	AAEL006921	Down	-0.472236	0.0991142	0.000467792
LOC5575386	AAEL011789	Down	-0.472537	0.10493	0.000525651
LOC5575983	AAEL012233	Down	-0.47335	0.0606911	5.26748e-05
LOC5572049	AAEL000245	Down	-0.474392	0.137387	0.00188061
LOC5578389	AAEL013679	Down	-0.475327	0.117555	0.000757874
LOC5571226	AAEL008921	Down	-0.475596	0.0522968	2.7176e-05
LOC5578743	AAEL003658	Down	-0.475642	0.143798	0.00196757
LOC5565770	AAEL004986	Down	-0.476019	0.119581	0.000781672
LOC5566973	AAEL005728	Down	-0.477151	0.153226	0.00319936
LOC5577073	AAEL019939	Down	-0.477613	0.0996103	0.000608193
LOC5579929	AAEL006805	Down	-0.478403	0.121787	0.000860624
LOC5579101	AAEL003842	Down	-0.480056	0.103327	0.000347114
LOC5574240	AAEL011007	Down	-0.481614	0.0895745	0.000242465
LOC5577591	AAEL020476	Down	-0.481643	0.113254	0.000673343
LOC5568202	AAEL006634	Down	-0.484475	0.161005	0.0029994
LOC5577180	AAEL013052	Down	-0.489424	0.160055	0.0029994
LOC5571418	AAEL009059	Down	-0.489748	0.109591	0.000611715
LOC5577985	AAEL013461	Down	-0.491448	0.148748	0.00326143
LOC5578520	AAEL013723	Down	-0.491536	0.112131	0.000696037
LOC5569575	AAEL007765	Down	-0.491743	0.0672847	0.000727724
LOC5575137	AAEL000378	Down	-0.491942	0.136334	0.000995166
LOC5564363	AAEL021301	Down	-0.493004	0.149965	0.00217481
LOC5564589	AAEL004345	Down	-0.493686	0.148001	0.00214246
LOC110675667	AAEL024853	Down	-0.494317	0.136865	0.0015313
LOC110674836	AAEL020033	Down	-0.495899	0.130928	0.00149704
LOC110677676		Down	-0.498403	0.236335	0.0357928
LOC5573863	AAEL010765	Down	-0.498524	0.05557	8.46799e-05
LOC5578582	AAEL013768	Down	-0.499032	0.142264	0.001487
LOC5566316	AAEL005305	Down	-0.501693	0.0851337	0.000216769
LOC5565454	AAEL000647	Down	-0.501783	0.125696	0.000889365
LOC5578090	AAEL003415	Down	-0.501786	0.0945252	0.0018926
LOC5566864	AAEL000847	Down	-0.503842	0.114489	0.000795649
LOC5569496	AAEL007682	Down	-0.503996	0.133493	0.00123491
CFI06_mgp12	-	Down	-0.504322	0.0256178	2.31776e-06
LOC5572622	AAEL009936	Down	-0.504516	0.16933	0.00359928
LOC5563882	AAEL014204	Down	-0.505644	0.180682	0.0059988
LOC5567531	AAEL027977	Down	-0.506085	0.162917	0.00322994
LOC5573292	AAEL010371	Down	-0.507521	0.141302	0.00158018
LOC110681150	AAEL025680	Down	-0.509059	0.156137	0.00299943
LOC5565621	AAEL020696	Down	-0.510741	0.148776	0.00231928
LOC110679616	AAEL027646	Down	-0.511416	0.14084	0.00104626
LOC5564768	AAEL004434	Down	-0.512076	0.0563072	0.000122575
CFI06_mgp11	-	Down	-0.512861	0.0311626	2.669e-06
LOC5564019	AAEL019487	Down	-0.517141	0.133249	0.00147446
LOC5579815	AAEL023500	Down	-0.517241	0.111127	0.000713119
LOC110676375		Down	-0.518137	0.14158	0.0018148
LOC5576934	AAEL012875	Down	-0.52241	0.13491	0.00168216
LOC5571262	AAEL001569	Down	-0.524258	0.100881	0.000274865
LOC23687516	AAEL017096	Down	-0.527381	0.0140319	7.16883e-05
LOC5566585	AAEL000759	Down	-0.527744	0.159705	0.00276813
LOC5575533	AAEL011912	Down	-0.529815	0.17154	0.00279944
LOC23687815	AAEL017395	Down	-0.53099	0.105772	0.000328067
LOC5572209	AAEL009601	Down	-0.531126	0.210473	0.0117976
CFI06_mgp02	-	Down	-0.532734	0.0350984	2.12455e-06
LOC5563904	AAEL003993	Down	-0.532965	0.0948769	0.000243011
LOC5574701	AAEL027910	Down	-0.533289	0.0929199	0.000312027
LOC5566370	AAEL005354	Down	-0.533767	0.133764	0.000873101
LOC5578686	AAEL003634	Down	-0.53453	0.117982	0.000467689
LOC5572672	AAEL001852	Down	-0.535167	0.0726208	1.88687e-05
LOC5580062	AAEL002135	Down	-0.536757	0.15873	0.00305195
LOC5574193	AAEL002309	Down	-0.536905	0.226814	0.0183963
LOC110675397	AAEL020955	Down	-0.539144	0.15927	0.00215767
LOC5570136	AAEL008105	Down	-0.543162	0.139031	0.00104872
LOC5573994	AAEL010843	Down	-0.543206	0.0452391	2.22215e-06
LOC5564337		Down	-0.544699	0.169915	0.00315157
LOC5571828	AAEL001690	Down	-0.544814	0.110532	0.00038201
LOC5569598	AAEL021578	Down	-0.545049	0.111506	0.000471442
LOC5564931	AAEL004503	Down	-0.545065	0.0235099	6.47827e-07
LOC5569637	AAEL007778	Down	-0.546842	0.088038	0.000144512
LOC5573007	AAEL001925	Down	-0.547127	0.167919	0.00239952
LOC5566877	AAEL000811	Down	-0.547226	0.14626	0.00144864
LOC5576170	AAEL012359	Down	-0.552559	0.0474585	5.90323e-05
LOC5568211	AAEL006642	Down	-0.554482	0.0364295	5.59001e-06
LOC110681196	AAEL017135	Down	-0.554502	0.156217	0.00175418
LOC5571825	AAEL001698	Down	-0.55655	0.0880081	0.000153919
LOC5574640	AAEL011274	Down	-0.556735	0.128565	0.000603463
LOC5570648	AAEL008468	Down	-0.557272	0.142608	0.00105512
LOC5579187	AAEL003873	Down	-0.560732	0.122748	0.000638089
LOC5574213	AAEL021016	Down	-0.561952	0.155484	0.00247504
LOC110678991	AAEL027217	Down	-0.562745	0.160201	0.00151078
LOC5568503	AAEL006922	Down	-0.564969	0.08414	0.000203397
LOC5563589	AAEL000090	Down	-0.565054	0.117959	0.000147505
LOC5567961	AAEL006420	Down	-0.567642	0.127899	0.00062079
LOC5564517	AAEL004291	Down	-0.567712	0.161718	0.00125357
LOC5574634	AAEL020739	Down	-0.568404	0.0935217	0.000129687
LOC5579043	AAEL013987	Down	-0.568487	0.0546414	3.83322e-05
LOC5567639	AAEL006239	Down	-0.569792	0.151042	0.00102137
LOC5570080	AAEL001336	Down	-0.573039	0.107911	0.000107077
LOC5571172	AAEL008862	Down	-0.573678	0.165021	0.0020932
CFI06_mgp08	-	Down	-0.57418	0.0286744	4.4977e-06
LOC5570924	AAEL026751	Down	-0.574485	0.1197	7.44304e-05
LOC5578459	AAEL000486	Down	-0.577568	0.0718979	1.50471e-05
LOC5572129	AAEL026603	Down	-0.580691	0.0937556	0.000233348
LOC5578156	AAEL013536	Down	-0.583011	0.0685161	9.18253e-06
LOC110674263	AAEL023991	Down	-0.584606	0.160423	0.00140496
LOC5578696	AAEL025569	Down	-0.593278	0.158745	0.000864072
LOC5573312	AAEL010416	Down	-0.59447	0.114505	0.000223458
LOC5567305	AAEL005956	Down	-0.599648	0.146731	0.0010169
LOC5565095	AAEL004589	Down	-0.60144	0.0415817	1.53253e-06
LOC5574072	AAEL010909	Down	-0.602618	0.140013	0.000710946
LOC5567126	AAEL005879	Down	-0.603321	0.135974	0.000749447
LOC5575278	AAEL011741	Down	-0.60353	0.081671	0.000823597
LOC5570960	AAEL008692	Down	-0.605065	0.133261	0.000610158
LOC5569048	AAEL007344	Down	-0.611979	0.10494	0.00039654
LOC5566687	AAEL005558	Down	-0.612568	0.0588951	5.28091e-05
LOC5570622	AAEL008428	Down	-0.614186	0.0691486	2.18871e-06
LOC5571869	-	Down	-0.619108	0.146282	0.000935769
LOC5569782	AAEL007920	Down	-0.622352	0.132123	0.000767474
LOC5572561	AAEL009894	Down	-0.622684	0.129092	6.97725e-05
LOC110679583	AAEL023591	Down	-0.622752	0.0705094	3.6476e-05
LOC5567466	AAEL000958	Down	-0.623553	0.116968	0.000213295
LOC5577270	AAEL019537	Down	-0.625814	0.154204	0.000935732
LOC5577316	AAEL013163	Down	-0.626016	0.084863	4.06465e-05
LOC5563644	AAEL000077	Down	-0.626118	0.160623	0.00115452
LOC5575321	AAEL002597	Down	-0.628156	0.112197	0.000186126
LOC5571093	AAEL008801	Down	-0.629482	0.0662753	0.000122722
LOC5564469	AAEL014452	Down	-0.629782	0.123323	0.000762444
LOC5564117	AAEL019408	Down	-0.63388	0.0803223	8.38657e-05
LOC5579108	AAEL003844	Down	-0.633975	0.0827503	9.04186e-05
LOC5566450	AAEL005391	Down	-0.635249	0.146983	0.000864933
LOC5569183	AAEL007439	Down	-0.640017	0.0643836	6.67389e-06
LOC5579484	AAEL015298	Down	-0.643205	0.14747	0.00061438
LOC5568743	AAEL007092	Down	-0.645081	0.159331	0.00126389
LOC5578378	AAEL013653	Down	-0.645804	0.123936	0.000252171
LOC5570223	AAEL008157	Down	-0.646814	0.167526	0.00132106
LOC5565253	AAEL004688	Down	-0.647696	0.131368	0.000721611
LOC5576102	AAEL002779	Down	-0.651384	0.153973	0.000702471
LOC5568114	AAEL006551	Down	-0.654501	0.158183	0.000886675
LOC5568254	AAEL006702	Down	-0.654951	0.109407	0.000144223
LOC5580057	AAEL002170	Down	-0.655565	0.145042	0.000473854
LOC5579871	AAEL005985	Down	-0.656469	0.0703526	1.59595e-05
LOC5566613	AAEL000757	Down	-0.658901	0.197731	0.00185275
LOC5567703	AAEL006277	Down	-0.663123	0.1533	0.000176086
LOC5573851	AAEL010777	Down	-0.668384	0.0568244	0.000121701
LOC5568256	AAEL006691	Down	-0.669582	0.134039	0.000289834
LOC5574614	AAEL011248	Down	-0.677365	0.0990555	7.5756e-05
LOC5576104	AAEL002777	Down	-0.681629	0.155193	0.000862198
LOC5577489	AAEL013229	Down	-0.681915	0.0551648	1.94674e-05
LOC5575706	AAEL012014	Down	-0.682747	0.135992	0.000156597
LOC5574982	AAEL021554	Down	-0.682971	0.139488	0.000640692
LOC5580053	AAEL002175	Down	-0.684589	0.149371	0.000300711
LOC5578619	AAEL003590	Down	-0.687306	0.108424	0.000137418
LOC5576370	AAEL012466	Down	-0.689878	0.142601	0.000203003
LOC5571275	AAEL001577	Down	-0.690394	0.14542	0.000292984
LOC5570228	AAEL008185	Down	-0.692188	0.136975	0.000346672
LOC5571878	AAEL009367	Down	-0.694091	0.128288	0.000341571
LOC5566942	AAEL005535	Down	-0.697358	0.0987368	0.000149757
LOC5565217	AAEL004669	Down	-0.69805	0.113047	9.22341e-05
LOC5570068	AAEL001331	Down	-0.700646	0.156729	0.000408383
LOC110674815	AAEL026819	Down	-0.701578	0.137407	5.87626e-05
LOC5567124	AAEL023543	Down	-0.703029	0.120536	6.78907e-05
LOC5573667	AAEL010673	Down	-0.706056	0.12172	0.000121895
LOC5579494	AAEL015271	Down	-0.708417	0.156151	0.000356243
LOC5563780	AAEL019562	Down	-0.712026	0.158453	0.000240594
LOC5579045	AAEL013980	Down	-0.713303	0.0960792	9.92885e-06
LOC5568253	AAEL006699	Down	-0.714512	0.125248	0.00018292
CFI06_mgp01	-	Down	-0.715928	0.0715722	9.84536e-06
LOC5577267	AAEL013119	Down	-0.72028	0.135855	0.000109489
LOC5570041	AAEL000172	Down	-0.721431	0.166545	0.000672567
LOC5576139	AAEL022535	Down	-0.724677	0.128624	7.37084e-05
LOC5566064	AAEL005149	Down	-0.72746	0.163404	0.000723856
LOC5567242	AAEL000883	Down	-0.728506	0.153675	0.000432631
LOC5579095	AAEL003857	Down	-0.729214	0.139983	4.0322e-05
LOC5566457	AAEL005428	Down	-0.733028	0.161757	0.000251083
LOC5570324	AAEL001385	Down	-0.735019	0.126749	0.000138438
LOC5576007	AAEL021113	Down	-0.73887	0.136982	0.00022344
LOC5569518	AAEL007704	Down	-0.739533	0.110111	0.000173106
LOC5570419	AAEL008306	Down	-0.742088	0.130094	9.04462e-05
LOC5567160	AAEL005910	Down	-0.74554	0.160385	0.000602956
LOC5574180	AAEL002304	Down	-0.74651	0.129058	0.000195208
LOC5564929	AAEL004488	Down	-0.746839	0.134973	0.000128972
LOC5569427	AAEL007624	Down	-0.748621	0.0983012	3.85432e-05
LOC5576270	AAEL012421	Down	-0.751003	0.109286	0.00010041
LOC5568072	AAEL006514	Down	-0.752456	0.148873	0.000173179
LOC5565730	AAEL025911	Down	-0.756057	0.130373	0.000250285
LOC5564231	AAEL004176	Down	-0.756806	0.145176	0.000255899
LOC5565647	AAEL004913	Down	-0.761101	0.158816	0.000258677
LOC5579951	AAEL006786	Down	-0.765267	0.0836532	9.36159e-06
LOC5577268	AAEL013128	Down	-0.776607	0.105376	6.3803e-05
LOC5565836	AAEL005017	Down	-0.776843	0.102976	7.25422e-06
LOC5569288	AAEL007547	Down	-0.777318	0.103279	6.31672e-05
LOC5564821	AAEL000626	Down	-0.778246	0.0965562	1.97036e-05
LOC5577537	AAEL013252	Down	-0.778334	0.153167	0.000417801
LOC5579183	AAEL003901	Down	-0.779447	0.119716	0.000434196
LOC5564530	AAEL013092	Down	-0.781068	0.158784	0.000193002
LOC5567220	AAEL000898	Down	-0.782815	0.116235	6.86297e-05
LOC110675318	-	Down	-0.785161	0.148615	0.000121081
LOC5573328	AAEL010411	Down	-0.785981	0.0584581	1.1325e-05
CFI06_mgp07	-	Down	-0.786817	0.0597919	1.21622e-05
LOC110677685	AAEL023769	Down	-0.7871	0.0846533	4.24239e-05
LOC5580073	AAEL002158	Down	-0.788888	0.13426	0.000284626
CFI06_mgp09	-	Down	-0.790799	0.035395	0.000112907
LOC5570054	AAEL000186	Down	-0.792429	0.136353	0.000363904
LOC5579113	AAEL003817	Down	-0.794272	0.141559	0.000300764
LOC5567410	AAEL006069	Down	-0.796992	0.151788	0.000327473
LOC5576841	AAEL012827	Down	-0.801575	0.0977169	0.000781235
LOC5567769	AAEL000102	Down	-0.80376	0.0826589	0.000133895
LOC5578266	AAEL003505	Down	-0.804099	0.0394085	3.72948e-06
LOC5567141	AAEL019742	Down	-0.811094	0.123928	0.000209197
LOC5568331	AAEL001094	Down	-0.812259	0.115481	0.000106262
LOC5570932	AAEL008671	Down	-0.818991	0.12541	7.57885e-05
LOC5573813	AAEL010731	Down	-0.81935	0.149849	0.000216205
CFI06_mgr01	-	Down	-0.821771	0.0785768	1.44573e-05
LOC110678443	AAEL027700	Down	-0.822274	0.102861	4.31051e-05
LOC5579964	AAEL007595	Down	-0.82359	0.127273	9.7961e-05
LOC5572008	AAEL009483	Down	-0.825555	0.106241	4.75465e-05
LOC5573523	AAEL024184	Down	-0.8283	0.12106	0.000124361
LOC5566470	AAEL005408	Down	-0.835242	0.115831	6.06438e-05
LOC5580160	AAEL011397	Down	-0.836839	0.140829	0.000223178
LOC5575085	AAEL011641	Down	-0.837683	0.0533814	1.46063e-06
LOC5571016	AAEL008739	Down	-0.8414	0.155292	0.000291541
LOC5574452	AAEL011168	Down	-0.84212	0.148551	4.30018e-05
LOC110680755	AAEL011758	Down	-0.842626	0.11731	4.80296e-05
LOC5568876	AAEL023521	Down	-0.847718	0.151151	0.000329634
LOC5564477	AAEL014484	Down	-0.852567	0.092588	2.7984e-05
LOC5565612	AAEL004873	Down	-0.857701	0.126763	1.08561e-05
LOC5568477	AAEL006883	Down	-0.860438	0.154152	0.00030121
LOC5571461	AAEL009092	Down	-0.864341	0.0853288	4.42376e-05
LOC110679018	AAEL020147	Down	-0.873586	0.13349	4.77134e-05
LOC5568914	AAEL007209	Down	-0.875217	0.148174	0.000218975
LOC5565891	AAEL000706	Down	-0.884228	0.0849788	5.83648e-06
LOC5568600	AAEL001102	Down	-0.890409	0.125719	0.000155349
LOC5575615	AAEL019860	Down	-0.891491	0.0900565	3.36083e-05
LOC5565453	AAEL000667	Down	-0.892116	0.17867	0.000631183
LOC5570558	AAEL008364	Down	-0.894893	0.167904	0.000252894
LOC5575831	AAEL012099	Down	-0.894987	0.0629661	2.98415e-05
LOC5566800	AAEL005651	Down	-0.895232	0.067948	5.23442e-06
LOC5574667	AAEL011302	Down	-0.899835	0.0486866	0.000172866
LOC5564552	AAEL004311	Down	-0.900924	0.150188	0.000158136
LOC5576348	AAEL002861	Down	-0.90541	0.109796	7.6816e-05
LOC5574270	AAEL011038	Down	-0.906867	0.142942	0.00025763
LOC5576488	AAEL002900	Down	-0.907809	0.0964087	5.25409e-06
LOC5580019	AAEL009645	Down	-0.917153	0.0477643	0.000149715
LOC5565389	AAEL004777	Down	-0.92189	0.118085	1.15163e-05
CFI06_mgr02	-	Down	-0.924756	0.0208073	5.65285e-10
LOC5572257	AAEL009680	Down	-0.925946	0.103795	6.92496e-05
LOC5577227	AAEL003130	Down	-0.926152	0.103193	2.78965e-06
LOC5567702	AAEL006275	Down	-0.933458	0.118966	6.47289e-05
LOC5568166	AAEL006609	Down	-0.940053	0.130165	0.000107819
LOC5568938	AAEL007246	Down	-0.941535	0.13225	4.92822e-05
LOC5572255	AAEL009681	Down	-0.953613	0.129315	0.000100835
LOC5568292	AAEL006721	Down	-0.955426	0.10378	5.25263e-06
LOC5576078	AAEL012310	Down	-0.956927	0.131677	4.72225e-05
LOC5578506	AAEL023729	Down	-0.958144	0.179843	0.000289914
LOC5568045	AAEL026555	Down	-0.971441	0.320474	0.00398691
LOC5571449	AAEL009085	Down	-0.971908	0.144114	0.000118937
LOC5578596	AAEL013778	Down	-0.97368	0.133316	7.63451e-05
LOC5573215	AAEL019561	Down	-0.976443	0.131728	0.000170005
LOC110678629	AAEL028247	Down	-0.977436	0.0605332	6.90735e-06
LOC110675610	AAEL026008	Down	-0.985597	0.0295187	8.21688e-07
LOC5568403	AAEL006820	Down	-0.997534	0.0517382	3.04519e-06
LOC5565839	AAEL005027	Down	-1.0074	0.0943305	1.08152e-05
LOC5570366	AAEL008274	Down	-1.02179	0.156577	1.40801e-05
LOC5574376	AAEL018211	Down	-1.02296	0.083311	5.48662e-07
LOC5570214	AAEL008154	Down	-1.02815	0.128707	4.77833e-05
LOC110675611	AAEL026833	Down	-1.04073	0.0631221	6.10987e-07
LOC5567836	AAEL001009	Down	-1.05534	0.142126	2.86812e-05
LOC5575011	AAEL011564	Down	-1.0879	0.0975523	9.70327e-06
LOC5566468	AAEL005426	Down	-1.11363	0.13725	5.01556e-05
LOC5574590	AAEL002416	Down	-1.13968	0.139626	6.71032e-05
LOC5566824	AAEL022609	Down	-1.143	0.0612186	3.80253e-06
LOC5565670	AAEL014931	Down	-1.14455	0.144392	0.000102708
LOC5571779	AAEL009295	Down	-1.16349	0.116304	6.99332e-06
LOC5567037	AAEL005790	Down	-1.16436	0.144804	1.39443e-05
LOC5576246	AAEL002853	Down	-1.16635	0.158764	5.81725e-05
LOC5574609	AAEL008686	Down	-1.17369	0.134967	1.75348e-05
LOC5565048	AAEL004567	Down	-1.17475	0.0852932	2.24139e-05
LOC5572793	AAEL001906	Down	-1.17651	0.119296	2.24568e-05
LOC5565460	AAEL026741	Down	-1.18512	0.109315	4.95657e-05
LOC5579924	AAEL006794	Down	-1.19487	0.132948	4.40098e-05
LOC5564609	AAEL014531	Down	-1.19636	0.145285	6.52796e-05
CFI06_mgp03	-	Down	-1.20571	0.0652127	9.80716e-07
LOC5574220	AAEL010991	Down	-1.21603	0.134157	6.50947e-05
LOC5568939	AAEL007238	Down	-1.21662	0.13066	2.17244e-05
LOC5567097	AAEL005839	Down	-1.22385	0.108217	1.89416e-05
LOC5573583	AAEL002130	Down	-1.24031	0.103334	4.02278e-05
LOC5564121	AAEL004090	Down	-1.25838	0.136847	6.0603e-05
LOC5578507	AAEL013715	Down	-1.26145	0.290105	0.000124621
LOC5576330	AAEL019728	Down	-1.27475	0.0669263	1.67635e-05
LOC5571052	AAEL017356	Down	-1.30335	0.120669	7.35125e-06
LOC5564196	AAEL014348	Down	-1.30543	0.0764355	4.15608e-07
LOC5571127	AAEL019751	Down	-1.31591	0.0985364	5.66879e-06
LOC5569143	AAEL007403	Down	-1.33091	0.110807	1.45245e-05
LOC5572983	AAEL001919	Down	-1.33996	0.120971	6.56423e-06
LOC5570461	AAEL008356	Down	-1.34121	0.0870612	1.43437e-05
CFI06_mgp13	-	Down	-1.34332	0.0696066	5.7293e-06
CFI06_mgp06	-	Down	-1.42796	0.0682748	1.73392e-06
LOC5570678	AAEL008473	Down	-1.43016	0.101433	1.88716e-05
LOC5570591	AAEL008408	Down	-1.43543	0.10477	5.10919e-06
LOC5575550	AAEL002661	Down	-1.43846	0.0711719	3.37903e-06
LOC5572513	AAEL009850	Down	-1.50213	0.0706044	8.73561e-07
LOC110677665	AAEL010932	Down	-1.52994	0.0800024	4.90859e-06
LOC110675609	AAEL021795	Down	-1.53677	0.0572024	7.13026e-07
CFI06_mgp05	-	Down	-1.54518	0.0615094	2.64055e-06
LOC5566467	AAEL005417	Down	-1.55684	0.129895	2.20678e-05
LOC5577480	AAEL024613	Down	-1.57983	0.101843	6.28238e-06
LOC110675128	AAEL026302	Down	-1.58063	0.0420095	1.05515e-07
LOC5570856	AAEL008622	Down	-1.62952	0.0953504	1.66577e-05
LOC110680939	AAEL004175	Down	-1.63623	0.113569	1.67396e-05
LOC110674148		Down	-1.89785	0.134295	4.6073e-06
LOC110674150		Down	-1.90768	0.159895	3.41964e-05
LOC110676705	AAEL022822	Down	-1.93265	0.146376	1.42103e-05
LOC5566497		Down	-2.15723	0.0504941	7.99064e-07
LOC5577707		Down	-2.7076	0.161837	3.59752e-06

## Sheet: Cardia-1
gene	VectorBase_ID	Regulation	de_coef	de_se	de_pval
LOC110676831	-	Up	1.4553	0.246457	0.000172125
LOC5578307	AAEL013628	Up	1.32921	0.143144	9.30654e-05
LOC5567470	AAEL000947	Up	1.31984	0.336447	0.00106164
LOC5570464		Up	1.19796	0.304778	0.00163452
LOC5564567	AAEL014516	Up	1.09685	0.102354	1.00495e-06
LOC5570465	AAEL026904	Up	1.06441	0.0703217	6.44311e-06
LOC5576327	AAEL000406	Up	1.06106	0.293997	0.00208139
LOC5569925	AAEL027654	Up	1.05667	0.187821	0.000311833
LOC5563839	AAEL024195	Up	1.00232	0.371393	0.0133973
LOC5570810	AAEL008574	Up	0.987916	0.337894	0.009998
LOC5571803	AAEL009330	Up	0.987726	0.145618	0.000116977
LOC5577203	AAEL013102	Up	0.984359	0.329959	0.00679864
LOC5571053	AAEL008769	Up	0.964357	0.236206	0.0014289
LOC5579278	AAEL015631	Up	0.959891	0.431189	0.029994
LOC5565328	AAEL004727	Up	0.883602	0.371852	0.0289942
LOC5574645	AAEL011278	Up	0.882576	0.384039	0.0387922
LOC5578856	AAEL003713	Up	0.864594	0.372015	0.0255949
LOC5567473	AAEL000931	Up	0.864351	0.345682	0.0171966
LOC5575279	AAEL014896	Up	0.860612	0.316282	0.0113977
LOC5568556	AAEL001126	Up	0.86029	0.342883	0.0145971
LOC5577761	AAEL003298	Up	0.851838	0.308009	0.00939812
LOC5574993	AAEL002534	Up	0.846868	0.0796725	1.61399e-05
LOC5573855	AAEL010776	Up	0.842406	0.24708	0.00319936
LOC5565116	AAEL019586	Up	0.830213	0.376055	0.0329934
LOC5568916	AAEL019536	Up	0.825669	0.300032	0.00919816
LOC5566341	AAEL005329	Up	0.821671	0.367905	0.0317936
LOC5567028	AAEL005762	Up	0.819424	0.316758	0.00939812
LOC5565578	AAEL014893	Up	0.809388	0.26082	0.00339932
LOC5566484	AAEL005401	Up	0.775025	0.132293	0.000277318
LOC5565804	AAEL005008	Up	0.766973	0.212432	0.00508939
LOC5565246	AAEL014768	Up	0.752644	0.277686	0.0143971
LOC5577309	AAEL013158	Up	0.748997	0.105782	8.75905e-05
LOC110674160	AAEL022282	Up	0.745543	0.321883	0.0231954
LOC5574674	AAEL011320	Up	0.742322	0.34436	0.0375925
LOC5577930	AAEL025363	Up	0.740723	0.205399	0.00247855
LOC5577809	AAEL013389	Up	0.72589	0.337291	0.0371926
LOC5564226	-	Up	0.721408	0.0551124	1.81836e-05
LOC5573319	AAEL010403	Up	0.718098	0.290893	0.019796
LOC5571039	AAEL008784	Up	0.717573	0.134152	0.000288671
LOC5574741	AAEL011379	Up	0.710363	0.271236	0.0131974
LOC5572519	AAEL009847	Up	0.710001	0.269599	0.014797
LOC5574167	AAEL010977	Up	0.701423	0.109639	0.000192189
LOC5575647	AAEL011980	Up	0.685645	0.296993	0.0261948
LOC5578443	AAEL000485	Up	0.683682	0.337985	0.0467906
LOC5573778	AAEL000293	Up	0.66048	0.263799	0.015197
LOC5568583	AAEL001113	Up	0.640103	0.118524	0.000374278
LOC5574223	AAEL012382	Up	0.638179	0.290648	0.0287942
LOC5577385	AAEL000467	Up	0.636729	0.275449	0.0205959
LOC5569531	AAEL007715	Up	0.620648	0.0458397	2.11802e-05
LOC5572968	AAEL010168	Up	0.620565	0.0440482	1.36421e-05
LOC5571844	AAEL001703	Up	0.613386	0.075622	4.04168e-05
LOC5572634	AAEL001863	Up	0.609675	0.0987625	0.000120733
LOC110673978	AAEL006000	Up	0.605066	0.283641	0.0379924
LOC110674569	AAEL020789	Up	0.599719	0.290927	0.0421916
LOC5577354	AAEL000424	Up	0.597838	0.242129	0.0159968
LOC5573751	AAEL000294	Up	0.596778	0.160882	0.00183043
LOC5567396	AAEL006053	Up	0.59396	0.191078	0.00359928
LOC5576021	AAEL019755	Up	0.582709	0.281628	0.035193
LOC5568656	-	Up	0.570742	0.207651	0.0089982
LOC5570978	AAEL008705	Up	0.567653	0.265334	0.0393921
LOC5579654	AAEL003970	Up	0.566531	0.169784	0.00185051
LOC5566116	AAEL005174	Up	0.56257	0.260657	0.0315937
LOC5578532	AAEL013739	Up	0.559106	0.227564	0.0185963
LOC5576344	AAEL002859	Up	0.558515	0.222973	0.0133973
LOC5570108	AAEL020238	Up	0.556945	0.0581439	0.000684204
LOC5578505	AAEL013703	Up	0.54065	0.0941821	0.000150255
LOC5564749	AAEL014609	Up	0.538697	0.183676	0.00439912
LOC5570432	AAEL008329	Up	0.537794	0.0498092	3.06535e-06
LOC5576203	AAEL012398	Up	0.537449	0.237343	0.0241952
LOC5575790	AAEL012062	Up	0.537141	0.0986056	0.000296715
LOC5572525	AAEL009844	Up	0.530411	0.14907	0.00151796
LOC5575687	AAEL013713	Up	0.528662	0.249254	0.0389922
LOC5567163	AAEL005901	Up	0.520747	0.0564755	2.83925e-05
LOC5575983	AAEL012233	Up	0.516635	0.23803	0.0437912
LOC5566251	AAEL015110	Up	0.508685	0.251111	0.0403919
LOC110677919	AAEL020749	Up	0.506786	0.0411151	2.19559e-06
LOC5576917	AAEL012860	Up	0.495328	0.117129	0.000360843
LOC5571006	AAEL008738	Up	0.490635	0.228109	0.0369926
LOC110677764	AAEL024434	Up	0.487739	0.0449639	8.33955e-06
LOC5565892	AAEL000713	Up	0.482058	0.165734	0.00439912
LOC5564556	AAEL004325	Up	0.476009	0.0576959	8.52856e-05
LOC5578368	AAEL003530	Up	0.472973	0.0492716	1.38731e-05
LOC5569529	AAEL007699	Up	0.472579	0.0487381	1.98643e-05
LOC5572534	AAEL009859	Up	0.471695	0.122047	0.000886661
LOC5580329	AAEL013069	Up	0.467641	0.0608208	4.64879e-05
LOC5572725	AAEL009994	Up	0.46201	0.0587226	0.000102459
LOC5578293	AAEL022819	Up	0.458564	0.212955	0.0283943
LOC5564259	AAEL022285	Up	0.457472	0.138036	0.00274304
LOC5565856	AAEL005040	Up	0.450889	0.219688	0.0389922
LOC5578313	AAEL013625	Up	0.449201	0.0472323	6.6851e-05
LOC5577765	AAEL003309	Up	0.43967	0.200513	0.0269946
LOC5568717	AAEL007043	Up	0.435582	0.207586	0.0357928
LOC23687495	AAEL017075	Up	0.435413	0.162009	0.00739852
LOC5575037	AAEL011587	Up	0.435067	0.0487091	2.95356e-05
LOC5576672	AAEL012702	Up	0.423016	0.205553	0.0383923
LOC5576758	AAEL025553	Up	0.417235	0.0464691	2.93658e-05
LOC23687936	AAEL017516	Up	0.410797	0.0475375	7.19437e-05
LOC5566843	AAEL000823	Up	0.405066	0.0457441	6.97207e-05
LOC23687450	AAEL017030	Up	0.401547	0.202104	0.04979
LOC5574648	AAEL011288	Up	0.39994	0.096935	0.000583818
LOC5571173	AAEL008871	Up	0.396231	0.166482	0.0187962
LOC5564925	AAEL019568	Up	0.391158	0.113961	0.00238206
LOC5573413	AAEL002047	Up	0.380519	0.044652	1.75516e-05
LOC5570675	AAEL008481	Up	0.359253	0.0439385	2.67485e-05
LOC5577996	AAEL003396	Up	0.35644	0.0458927	4.85463e-06
LOC5580030	AAEL009653	Up	0.351329	0.0447569	0.000136068
LOC5563786	AAEL003942	Up	0.34896	0.0482458	1.64356e-05
LOC5567848	AAEL000987	Up	0.339266	0.044018	0.000849035
LOC5570243	AAEL008192	Up	0.337106	0.0551763	0.000207862
LOC5577034	AAEL012944	Up	0.336513	0.0497946	0.000128918
LOC5563590	AAEL000032	Up	0.334573	0.0529676	0.00142123
LOC5567070	AAEL005817	Up	0.333366	0.0468744	3.5219e-05
LOC5575105	AAEL011656	Up	0.330903	0.045954	0.00110402
LOC5580259	AAEL012585	Up	0.329446	0.0486145	0.000928753
LOC5573217	AAEL010299	Up	0.329248	0.0477718	4.68571e-05
LOC5572090	AAEL009496	Up	0.325079	0.0490686	0.000118579
LOC5565553	AAEL022140	Up	0.314101	0.0457302	2.17462e-05
LOC5571846	AAEL023681	Up	0.309743	0.0445103	0.000948167
LOC5574844	AAEL011447	Up	0.298832	0.0453033	0.000126133
LOC5565624	AAEL014292	Up	0.298131	0.0508769	0.000112194
LOC5572365	AAEL009747	Up	0.293891	0.0536297	0.000183937
LOC5578306	AAEL013623	Up	0.289623	0.109099	0.00819836
LOC5572931	AAEL010145	Up	0.286643	0.13893	0.0455909
LOC5569681	AAEL007818	Up	0.285033	0.0727266	0.000337051
LOC5574866	AAEL011471	Up	0.283312	0.0412963	0.000842277
LOC5571564	AAEL009151	Up	0.282895	0.0447937	0.000155469
LOC5565474	AAEL002495	Up	0.280761	0.0818371	0.00261211
LOC5568090	AAEL006511	Up	0.278296	0.0452793	0.000123993
LOC5573211	AAEL010318	Up	0.278203	0.0648546	0.000573921
LOC5576653	AAEL012686	Up	0.269762	0.0469846	0.00137208
LOC5566959	AAEL005722	Up	0.269072	0.0469599	0.00128414
LOC5565979	AAEL005097	Up	0.262015	0.0519014	0.00134901
LOC5573763	AAEL000269	Up	0.261461	0.0889887	0.00419916
LOC5578857	AAEL027402	Up	0.260293	0.108444	0.0163967
LOC5566522	AAEL005451	Up	0.256393	0.0428491	0.000154059
LOC5578625	AAEL003582	Up	0.255337	0.0502272	0.000463884
LOC5577478	AAEL013221	Up	0.254705	0.0430513	7.05649e-05
LOC5570139	AAEL008103	Up	0.254201	0.0473297	0.000156588
LOC5569582	AAEL007771	Up	0.254083	0.0416911	0.00018558
LOC5575450	AAEL002639	Up	0.25355	0.0491153	0.000254399
LOC5573974	AAEL010821	Up	0.252087	0.0507385	0.000188748
LOC5570244	AAEL008188	Up	0.250561	0.0444829	5.48802e-05
LOC23687442	AAEL017022	Up	0.245009	0.0729085	0.00457079
LOC110676232	AAEL023983	Up	0.241939	0.0491637	0.000240398
LOC23687618	AAEL017198	Up	0.235884	0.0379936	0.000147063
LOC5579186	AAEL003872	Up	0.231269	0.0599979	0.000681074
LOC5566772	AAEL005629	Up	0.22996	0.0433041	0.000124638
LOC5567964	AAEL006425	Up	0.22531	0.105207	0.0369926
LOC5577566	AAEL013272	Up	0.219808	0.0522926	0.000565989
LOC110678734	AAEL019403	Up	0.216937	0.0602985	0.00156392
LOC5564921	AAEL004500	Up	0.215107	0.0718704	0.00479904
LOC5573827	AAEL010756	Up	0.214417	0.0449091	0.000404137
LOC5576966	AAEL003060	Up	0.211766	0.0740792	0.00419916
LOC5574485	AAEL002372	Up	0.208245	0.0462733	0.000295999
LOC5573872	AAEL010787	Up	0.206192	0.0936468	0.0357928
LOC5578401	AAEL013689	Up	0.205097	0.0974591	0.0377924
LOC5568260	AAEL006698	Up	0.204882	0.0437895	0.000228726
LOC5565400	AAEL004783	Up	0.203955	0.0823916	0.014797
LOC5578243	AAEL015006	Up	0.203506	0.0461826	0.000586097
LOC5574515	AAEL019717	Up	0.195946	0.0732912	0.00819836
LOC5566228	AAEL005266	Up	0.183685	0.046951	0.00314458
LOC110676045	AAEL022286	Up	0.175992	0.0488835	0.00321713
LOC5565544	AAEL004855	Up	0.162659	0.0442939	0.00099771
LOC5579525	AAEL014562	Up	0.136513	0.0442966	0.00405288
LOC5576215	AAEL002832	Up	0.130443	0.0360388	0.00127311
LOC5563646	AAEL021083	Up	0.129638	0.041454	0.00319603
LOC5564212	AAEL004151	Up	0.1231	0.0482554	0.0115977
LOC5571927	AAEL020290	Up	0.118557	0.0474553	0.0137972
LOC5564713	AAEL014583	Up	0.113466	0.0429773	0.00839832
LOC5576744	AAEL024536	Down	-0.112573	0.044715	0.0141972
LOC5571609	AAEL009201	Down	-0.177192	0.07833	0.025195
LOC5566220	AAEL005270	Down	-0.178196	0.0708804	0.0103979
LOC5574526	AAEL011197	Down	-0.178913	0.0681767	0.009998
LOC5564878	AAEL004457	Down	-0.197034	0.0817692	0.0121976
LOC110675493	AAEL028043	Down	-0.207844	0.0531465	0.000927014
LOC5577719	AAEL013353	Down	-0.215812	0.100478	0.0313937
LOC5568046	AAEL006483	Down	-0.216165	0.0975721	0.0287942
LOC5577289	AAEL013139	Down	-0.229697	0.11318	0.0395921
LOC5565454	AAEL000647	Down	-0.230369	0.100048	0.0205959
LOC5579820	AAEL005524	Down	-0.230663	0.0825543	0.0059988
LOC5579199	AAEL014039	Down	-0.233556	0.09272	0.0105979
LOC5568550	-	Down	-0.238799	0.09869	0.0153969
LOC5572696	AAEL009964	Down	-0.24176	0.103295	0.0229954
LOC5575898	AAEL002737	Down	-0.24466	0.0782817	0.0029994
LOC5568255	AAEL006704	Down	-0.245205	0.104976	0.0223955
LOC5571976	AAEL009467	Down	-0.246915	0.117382	0.044791
CFI06_mgp02	-	Down	-0.248967	0.0851258	0.00419916
CFI06_mgp11	-	Down	-0.253109	0.0815574	0.00318922
LOC5564931	AAEL004503	Down	-0.26038	0.063234	0.000501793
LOC5572759	AAEL010017	Down	-0.263616	0.121111	0.0265947
LOC5573744	AAEL019937	Down	-0.263873	0.0974733	0.00579884
LOC5574783	AAEL011414	Down	-0.268934	0.112597	0.0139972
LOC5569950	AAEL008039	Down	-0.26949	0.0958567	0.00719856
LOC23687901	AAEL017481	Down	-0.272806	0.131752	0.0385923
LOC5564979	AAEL004513	Down	-0.276776	0.116812	0.0195961
LOC5574458	AAEL011180	Down	-0.277599	0.0697333	0.00296067
LOC5564047	AAEL004071	Down	-0.27932	0.102066	0.00719856
LOC5575305	AAEL002578	Down	-0.280846	0.103863	0.00839832
CFI06_mgp01	-	Down	-0.296173	0.13951	0.034993
LOC5578382	AAEL013661	Down	-0.296522	0.125724	0.0189962
LOC5574975	AAEL002526	Down	-0.299021	0.150963	0.0431914
LOC5574087	AAEL002257	Down	-0.30453	0.143106	0.0417916
LOC5566551	AAEL005471	Down	-0.305258	0.0974345	0.00259948
LOC5579795	AAEL003957	Down	-0.305984	0.100853	0.00335992
LOC5570050	AAEL000185	Down	-0.307521	0.146525	0.0325935
LOC5566566	AAEL005481	Down	-0.307973	0.151854	0.0375925
LOC5574816	AAEL002464	Down	-0.308646	0.0951596	0.00197774
LOC5572372	AAEL009760	Down	-0.314225	0.107313	0.00259948
LOC5567118	AAEL015304	Down	-0.32039	0.163266	0.0433913
LOC5565095	AAEL004589	Down	-0.321234	0.149956	0.0345931
LOC5570230	AAEL008152	Down	-0.323391	0.156714	0.0335933
LOC23687516	AAEL017096	Down	-0.326846	0.0414492	9.09471e-06
LOC5569632	AAEL007777	Down	-0.327779	0.122794	0.00959808
LOC5572296	AAEL001767	Down	-0.327819	0.136672	0.0163967
LOC5576650	AAEL012684	Down	-0.329738	0.121259	0.00659868
LOC5572156	AAEL009561	Down	-0.338565	0.11636	0.00559888
LOC5578590	AAEL013774	Down	-0.340101	0.091262	0.00145482
LOC5564053	AAEL004060	Down	-0.340245	0.113234	0.00539892
LOC5573732	AAEL000291	Down	-0.340513	0.0792412	0.000653288
LOC5567743	AAEL021429	Down	-0.340815	0.112897	0.00339932
LOC5579041	AAEL013989	Down	-0.345336	0.136491	0.00919816
LOC5569984	AAEL008073	Down	-0.345779	0.135958	0.0107978
LOC5567259	AAEL005931	Down	-0.348364	0.176445	0.0461908
CFI06_mgp12	-	Down	-0.3509	0.0771398	0.000433368
LOC5576472	AAEL002886	Down	-0.35538	0.159161	0.0281944
LOC23687710	AAEL017290	Down	-0.356034	0.159523	0.0261948
LOC5577568	AAEL013279	Down	-0.357151	0.123195	0.00359928
LOC5575278	AAEL011741	Down	-0.36092	0.0906536	0.000757363
LOC5577178	AAEL013047	Down	-0.36165	0.166032	0.029994
LOC5577499	AAEL003193	Down	-0.362111	0.180641	0.0479904
LOC5569575	AAEL007765	Down	-0.363972	0.14131	0.00879824
LOC5569124	AAEL007385	Down	-0.363996	0.0830372	0.00103213
LOC5577407	AAEL003161	Down	-0.365963	0.156158	0.0185963
LOC5574634	AAEL020739	Down	-0.368927	0.167189	0.0327934
LOC5566493	AAEL005432	Down	-0.36903	0.147853	0.010198
LOC110676736	AAEL028202	Down	-0.369449	0.163929	0.0287942
LOC5578882	AAEL013885	Down	-0.37449	0.140997	0.00579884
LOC5566373	AAEL005353	Down	-0.375654	0.186905	0.0489902
LOC5573948	AAEL002183	Down	-0.376726	0.14021	0.00639872
LOC5568408	AAEL006829	Down	-0.377845	0.167245	0.0243951
LOC23687462	AAEL017042	Down	-0.388442	0.193265	0.0459908
LOC5579951	AAEL006786	Down	-0.393397	0.174836	0.0229954
LOC5567559	AAEL006158	Down	-0.394097	0.125017	0.00280494
LOC5564976	AAEL004532	Down	-0.398476	0.191288	0.0377924
LOC5564133	AAEL004088	Down	-0.400641	0.139443	0.00319936
LOC5571304	AAEL008953	Down	-0.400666	0.137989	0.00439912
LOC5578604	AAEL021931	Down	-0.401295	0.11953	0.00243183
LOC5580166	AAEL002542	Down	-0.402601	0.190039	0.0329934
LOC5578684	AAEL003645	Down	-0.402615	0.116135	0.00187143
LOC5574178	AAEL019806	Down	-0.403136	0.177383	0.0273945
LOC5567286	AAEL005946	Down	-0.403907	0.178274	0.0291942
LOC5571080	AAEL008787	Down	-0.405851	0.136042	0.0039992
LOC5568503	AAEL006922	Down	-0.406594	0.112621	0.0013302
LOC5575995	AAEL002761	Down	-0.409811	0.17908	0.0245951
LOC5572521	AAEL009836	Down	-0.410086	0.101507	0.000698644
LOC5580239	AAEL012326	Down	-0.411868	0.0833999	0.000312058
LOC5571735	AAEL009257	Down	-0.418512	0.0777379	0.000438764
LOC5568430	AAEL006833	Down	-0.420325	0.185798	0.0225955
CFI06_mgp07	-	Down	-0.421219	0.129831	0.00260213
LOC110678029	AAEL021557	Down	-0.421847	0.134686	0.00259948
LOC5570622	AAEL008428	Down	-0.422473	0.106559	0.00139771
LOC110676270	AAEL023490	Down	-0.42355	0.189184	0.029994
CFI06_mgp08	-	Down	-0.431418	0.0827294	0.000180134
LOC5577316	AAEL013163	Down	-0.433521	0.157144	0.00839832
LOC5571685	AAEL009214	Down	-0.438682	0.0809546	0.000144985
LOC5563673	AAEL000541	Down	-0.439715	0.169084	0.0119976
LOC5575848	AAEL012113	Down	-0.440235	0.119822	0.00120987
LOC5569181	AAEL007441	Down	-0.441095	0.147875	0.00419916
LOC5571047	AAEL008768	Down	-0.44636	0.163441	0.00739852
LOC5569520	AAEL007707	Down	-0.447378	0.117268	0.000922401
LOC5572010	AAEL009476	Down	-0.447747	0.130024	0.00277993
LOC5570020	AAEL000182	Down	-0.447903	0.118206	0.00120429
LOC5572512	AAEL009842	Down	-0.450245	0.133072	0.00235508
LOC5580331	AAEL013074	Down	-0.451512	0.193217	0.0203959
LOC5565891	AAEL000706	Down	-0.455175	0.230983	0.0481904
LOC5567581	AAEL006174	Down	-0.456918	0.218048	0.0333933
LOC5573885	AAEL010798	Down	-0.45696	0.206856	0.0311938
LOC5572285	AAEL001779	Down	-0.457554	0.219547	0.045191
LOC5575338	AAEL002615	Down	-0.45883	0.220701	0.0437912
LOC5577893	AAEL013407	Down	-0.461645	0.103965	0.000215093
LOC5564516	AAEL004284	Down	-0.461952	0.105428	0.000413949
LOC5571141	AAEL019603	Down	-0.462395	0.166056	0.00719856
LOC5569050	AAEL007349	Down	-0.463158	0.0949203	0.000206454
LOC5579955	AAEL007592	Down	-0.468548	0.22725	0.0405919
LOC5578831	AAEL013875	Down	-0.473362	0.105488	0.000749111
LOC5579505	AAEL015136	Down	-0.474228	0.13117	0.00183945
LOC5573697		Down	-0.475034	0.193788	0.0205959
LOC5572538	AAEL009862	Down	-0.475754	0.231987	0.0465907
LOC5573863	AAEL010765	Down	-0.476697	0.145772	0.00268622
LOC5576170	AAEL012359	Down	-0.479238	0.0985419	0.0023665
LOC110677933	AAEL027357	Down	-0.479328	0.211548	0.0307938
LOC5568521	AAEL006928	Down	-0.480356	0.242746	0.0491902
LOC5579926	AAEL006795	Down	-0.481187	0.240403	0.0471906
LOC5570509	AAEL001432	Down	-0.48385	0.168109	0.00479904
LOC5576440	AAEL005536	Down	-0.48675	0.0840546	0.000231364
LOC5579871	AAEL005985	Down	-0.486863	0.208025	0.0307938
LOC5579108	AAEL003844	Down	-0.487929	0.126341	0.000860478
LOC5573964	AAEL010819	Down	-0.490527	0.0799092	7.22967e-05
LOC5578431	AAEL000516	Down	-0.491748	0.194749	0.0141972
CFI06_mgp09	-	Down	-0.49511	0.109899	0.000483021
LOC110676221	AAEL026834	Down	-0.49767	0.191899	0.0103979
LOC5577423	AAEL003160	Down	-0.50284	0.068925	6.71371e-05
LOC5571226	AAEL008921	Down	-0.504968	0.142453	0.00128275
LOC5572308	AAEL009700	Down	-0.508247	0.24888	0.0383923
LOC5574701	AAEL027910	Down	-0.510824	0.259806	0.0477904
LOC110676279	AAEL021140	Down	-0.511163	0.0858974	0.000124384
LOC5565839	AAEL005027	Down	-0.512593	0.242164	0.039992
LOC5571453	AAEL009074	Down	-0.513312	0.125621	0.000778142
LOC5572478	AAEL009808	Down	-0.520027	0.146166	0.00103049
LOC5567565	AAEL006169	Down	-0.520142	0.168572	0.00239952
LOC5569083	AAEL001209	Down	-0.520522	0.136882	0.00125014
LOC5573328	AAEL010411	Down	-0.521782	0.198454	0.0115977
LOC5564019	AAEL019487	Down	-0.52192	0.238182	0.0307938
LOC5577582	AAEL013287	Down	-0.522403	0.212639	0.0175965
LOC5568081	AAEL006516	Down	-0.523165	0.189841	0.0089982
LOC5572890	AAEL010095	Down	-0.526715	0.171556	0.00339932
LOC5573667	AAEL010673	Down	-0.527591	0.167709	0.00348346
LOC5574667	AAEL011302	Down	-0.530219	0.151511	0.00139186
LOC5570797	AAEL008588	Down	-0.530962	0.171377	0.00359928
LOC5580065	AAEL002161	Down	-0.532314	0.20457	0.00919816
LOC5578974	AAEL019746	Down	-0.532506	0.2415	0.0313937
LOC5571596	AAEL009185	Down	-0.535408	0.0988994	0.000239504
LOC5576996	AAEL003056	Down	-0.536362	0.177143	0.00379924
LOC5567193	AAEL000861	Down	-0.536712	0.229326	0.0239952
LOC5567857	AAEL006315	Down	-0.537558	0.236957	0.030194
LOC5574109	AAEL002263	Down	-0.537564	0.0892731	5.28292e-05
LOC5576124	AAEL002811	Down	-0.537711	0.176032	0.00326739
LOC5568211	AAEL006642	Down	-0.537788	0.117808	0.000627883
LOC5564541	AAEL004307	Down	-0.547968	0.245607	0.0295941
LOC5569968	AAEL020092	Down	-0.549598	0.104969	0.000386956
LOC5574657	AAEL021072	Down	-0.551874	0.208616	0.0109978
LOC5564821	AAEL000626	Down	-0.561695	0.166762	0.00252679
LOC5575813	AAEL012069	Down	-0.562435	0.143063	0.000939035
LOC5573238	AAEL010330	Down	-0.564753	0.207599	0.00859828
LOC5565389	AAEL004777	Down	-0.565106	0.243653	0.0257948
LOC5564477	AAEL014484	Down	-0.565184	0.192368	0.00439912
LOC5574496	AAEL002399	Down	-0.566757	0.221473	0.0143971
LOC5569049	AAEL007342	Down	-0.568719	0.0831827	2.54408e-05
LOC5565405	AAEL014843	Down	-0.570168	0.1199	0.000263455
LOC5574092	AAEL002267	Down	-0.572033	0.213978	0.00919816
LOC5568491	AAEL006904	Down	-0.572421	0.269083	0.039992
LOC5566079	AAEL015064	Down	-0.579297	0.135561	0.000568906
LOC110675403	AAEL026415	Down	-0.581294	0.26362	0.0405919
LOC110679583	AAEL023591	Down	-0.582498	0.235327	0.0173965
LOC5574472	AAEL002397	Down	-0.586024	0.246904	0.024995
LOC5573851	AAEL010777	Down	-0.588147	0.091263	0.000156759
LOC5563971	AAEL004023	Down	-0.594774	0.189379	0.00348538
LOC5565220	AAEL004676	Down	-0.596869	0.18025	0.0026508
LOC5577095	AAEL012994	Down	-0.597599	0.234195	0.0171966
LOC5564072	AAEL004067	Down	-0.604365	0.158093	0.000817557
LOC5576488	AAEL002900	Down	-0.605159	0.222011	0.00659868
LOC5568325	AAEL006718	Down	-0.605219	0.263398	0.0257948
LOC5574806	AAEL002467	Down	-0.60686	0.216757	0.00739852
LOC5570080	AAEL001336	Down	-0.612094	0.221763	0.00739852
LOC5572043	AAEL000234	Down	-0.61265	0.181652	0.00274914
LOC5571755	AAEL009278	Down	-0.615045	0.147703	0.00102391
LOC110679834	AAEL008159	Down	-0.615223	0.254686	0.0181964
LOC5573994	AAEL010843	Down	-0.615588	0.11491	0.000151056
LOC5566585	AAEL000759	Down	-0.617866	0.257465	0.0171966
LOC5566009	AAEL005106	Down	-0.618986	0.288016	0.034793
LOC5572154	AAEL029014	Down	-0.619255	0.277332	0.0259948
LOC110676812	AAEL025344	Down	-0.620272	0.315486	0.0489902
LOC5575432	AAEL011830	Down	-0.62147	0.286646	0.0315937
LOC110674049	AAEL027326	Down	-0.621721	0.24415	0.0109978
LOC5574333	AAEL002337	Down	-0.623265	0.27636	0.0283943
LOC5577489	AAEL013229	Down	-0.62437	0.28255	0.0237952
LOC5579903	AAEL001022	Down	-0.624709	0.190382	0.00297412
LOC5579045	AAEL013980	Down	-0.62558	0.160073	0.000622339
LOC5574943	AAEL010453	Down	-0.626166	0.285668	0.0345931
LOC110679374	AAEL026843	Down	-0.627178	0.109991	0.000279922
LOC5571789	AAEL009317	Down	-0.627211	0.169524	0.00178122
LOC5564118	AAEL004118	Down	-0.628543	0.162153	0.00104503
LOC5571093	AAEL008801	Down	-0.629801	0.119049	0.000418261
LOC110675318	-	Down	-0.631249	0.200381	0.00259948
LOC5572173	AAEL009590	Down	-0.634121	0.210748	0.00379924
LOC5564469	AAEL014452	Down	-0.634315	0.299814	0.0425915
LOC5568054	AAEL006480	Down	-0.634969	0.200725	0.00259948
LOC5578266	AAEL003505	Down	-0.635439	0.151202	0.000271591
LOC5563589	AAEL000090	Down	-0.635688	0.276727	0.0257948
LOC5572522	AAEL009837	Down	-0.640113	0.12314	0.000234296
LOC5576054	AAEL013952	Down	-0.641781	0.215033	0.00539892
LOC5568843	AAEL007162	Down	-0.643063	0.111596	0.000109114
LOC5575645	AAEL011979	Down	-0.643738	0.180542	0.00203918
LOC5566122	AAEL005177	Down	-0.644389	0.313229	0.0389922
LOC5566097	AAEL005169	Down	-0.644615	0.232648	0.004999
LOC5566651	AAEL005500	Down	-0.645182	0.299179	0.0371926
LOC5566800	AAEL005651	Down	-0.64711	0.204501	0.00359928
LOC5574592	AAEL002411	Down	-0.651209	0.110789	0.00017846
LOC5572209	AAEL009601	Down	-0.652953	0.124717	0.000225238
LOC5576835	AAEL012819	Down	-0.654544	0.104032	0.000240634
LOC5564236	AAEL020849	Down	-0.658819	0.29773	0.0263947
LOC5570136	AAEL008105	Down	-0.659223	0.237015	0.00739852
LOC5574240	AAEL011007	Down	-0.660448	0.13634	6.06611e-05
LOC5574633	AAEL011276	Down	-0.660704	0.313555	0.0481904
LOC5569598	AAEL021578	Down	-0.663545	0.21059	0.00239952
LOC5578659	AAEL013808	Down	-0.670726	0.238587	0.00559888
LOC5567091	AAEL012313	Down	-0.670907	0.187236	0.00139192
LOC5564278	AAEL014379	Down	-0.671098	0.181935	0.000975614
LOC5566736	AAEL019920	Down	-0.672283	0.188163	0.00146408
LOC5578619	AAEL003590	Down	-0.673311	0.0943622	5.35336e-05
LOC5567383	AAEL006061	Down	-0.675423	0.189808	0.00193301
LOC5565108	AAEL004586	Down	-0.683225	0.254458	0.00819836
LOC5568246	AAEL006685	Down	-0.684302	0.156648	0.000966499
LOC5573295	AAEL010382	Down	-0.684551	0.149018	0.000264014
LOC5574239	AAEL011009	Down	-0.68731	0.293003	0.0209958
LOC5575321	AAEL002597	Down	-0.6885	0.206864	0.00201927
LOC5566824	AAEL022609	Down	-0.691636	0.192099	0.00142989
LOC5578267	AAEL003492	Down	-0.693114	0.0913207	4.49533e-05
LOC5577637	AAEL003237	Down	-0.694222	0.301567	0.0287942
LOC5571127	AAEL019751	Down	-0.695394	0.186749	0.0014575
LOC5564317	AAEL000568	Down	-0.695767	0.272725	0.0129974
LOC5576420	AAEL012507	Down	-0.698504	0.281813	0.0215957
LOC5570114	AAEL008079	Down	-0.701865	0.111431	0.000104663
LOC5568876	AAEL023521	Down	-0.704075	0.315843	0.0337932
LOC5569782	AAEL007920	Down	-0.705063	0.259572	0.00839832
LOC5577023	AAEL012939	Down	-0.705115	0.167149	0.000542304
LOC5567772	AAEL000143	Down	-0.705916	0.331109	0.0331934
LOC5571712	AAEL009244	Down	-0.711476	0.127666	0.0001096
LOC23687553	AAEL017133	Down	-0.712436	0.339427	0.0405919
CFI06_mgp13	-	Down	-0.719389	0.147704	0.000592912
LOC5575270	AAEL011740	Down	-0.7199	0.176705	0.000907486
LOC5566301	AAEL005293	Down	-0.72034	0.177906	0.000360742
LOC110679691	AAEL027626	Down	-0.721713	0.247909	0.00439912
LOC5577180	AAEL013052	Down	-0.722701	0.256007	0.0109978
LOC5575395	AAEL011803	Down	-0.723055	0.17852	0.00116776
LOC110678443	AAEL027700	Down	-0.729486	0.147858	0.000423066
LOC5576532	AAEL012579	Down	-0.730626	0.322842	0.0375925
LOC110676370	AAEL021600	Down	-0.73097	0.204333	0.00235942
LOC5567037	AAEL005790	Down	-0.736472	0.250382	0.00439912
LOC23687501	AAEL017081	Down	-0.736722	0.174702	0.000648899
LOC23687815	AAEL017395	Down	-0.738776	0.26568	0.00739852
LOC5580053	AAEL002175	Down	-0.743183	0.270125	0.00979804
LOC5564753	AAEL006811	Down	-0.745544	0.276977	0.00979804
LOC5570663	AAEL008489	Down	-0.746041	0.190481	0.000489993
LOC5567341	AAEL006011	Down	-0.75208	0.0715548	5.86451e-07
LOC110678855	AAEL025367	Down	-0.753022	0.113963	3.71699e-05
LOC5573209	AAEL022977	Down	-0.754201	0.104964	7.09888e-05
LOC5577687	AAEL013320	Down	-0.755474	0.276243	0.0115977
LOC5568636	AAEL006990	Down	-0.757152	0.254261	0.004999
LOC5576612	AAEL012636	Down	-0.758518	0.354797	0.034793
LOC5567194	AAEL000859	Down	-0.76141	0.202747	0.00125979
LOC5578058	AAEL013494	Down	-0.764648	0.337183	0.0289942
LOC5565253	AAEL004688	Down	-0.766601	0.184725	0.00048623
LOC5578497	AAEL013702	Down	-0.776151	0.19196	0.000806166
LOC5569026	AAEL007322	Down	-0.777296	0.244689	0.00439912
LOC5568253	AAEL006699	Down	-0.778146	0.112286	2.6909e-05
LOC5566532	AAEL015202	Down	-0.783115	0.301562	0.0135973
LOC5567684	AAEL006251	Down	-0.785926	0.196455	0.00102745
LOC5574244	-	Down	-0.786951	0.180803	0.000196225
LOC5565060	AAEL025769	Down	-0.787445	0.159866	0.000162291
LOC5574731	AAEL011371	Down	-0.797271	0.1732	0.00053835
LOC110678695	AAEL028145	Down	-0.799533	0.173603	0.000535522
LOC110676001	AAEL020729	Down	-0.805236	0.13583	0.00023371
LOC5568998	AAEL025594	Down	-0.808503	0.33277	0.0189962
LOC5571289	AAEL019546	Down	-0.812022	0.153828	0.000185572
LOC5569832	AAEL007942	Down	-0.812798	0.12411	7.10217e-05
LOC5577564	AAEL013276	Down	-0.818422	0.326974	0.0229954
LOC5569183	AAEL007439	Down	-0.819704	0.134225	6.65111e-05
LOC5569822	AAEL001312	Down	-0.822355	0.213944	0.00152715
LOC5571930	AAEL009389	Down	-0.823059	0.224917	0.00201916
CFI06_mgp03	-	Down	-0.824474	0.138039	0.000137501
LOC5577984	AAEL013458	Down	-0.825712	0.244657	0.00271037
LOC5567465	AAEL000942	Down	-0.828221	0.301079	0.009998
LOC5567466	AAEL000958	Down	-0.831201	0.204461	0.00059058
LOC5572988	AAEL001938	Down	-0.846332	0.345679	0.0237952
LOC5566677	AAEL022387	Down	-0.849451	0.134867	3.35049e-05
LOC5569123	AAEL007387	Down	-0.850421	0.348253	0.0245951
LOC5571543	AAEL009131	Down	-0.851663	0.243908	0.00244082
LOC5564549	AAEL004317	Down	-0.851734	0.281602	0.00519896
LOC5568939	AAEL007238	Down	-0.853221	0.302438	0.00879824
LOC5572257	AAEL009680	Down	-0.855757	0.0955492	4.68709e-05
LOC5574946	AAEL011553	Down	-0.859242	0.238377	0.00112192
LOC5577519	AAEL021813	Down	-0.859271	0.278084	0.004999
LOC5573215	AAEL019561	Down	-0.860269	0.302139	0.0103979
LOC5574655	AAEL022570	Down	-0.861701	0.0854864	2.20553e-06
LOC5567218	AAEL000905	Down	-0.864524	0.225859	0.0010241
LOC5578605	AAEL003589	Down	-0.865958	0.13104	2.22375e-05
LOC5576408	AAEL012502	Down	-0.871279	0.329208	0.0141972
LOC5567506	AAEL006113	Down	-0.871723	0.279975	0.0039992
LOC5567100	AAEL005830	Down	-0.875412	0.289891	0.0059988
LOC5577227	AAEL003130	Down	-0.877254	0.205011	0.000632932
LOC5579100	AAEL026896	Down	-0.889348	0.13426	0.000289121
LOC5573442	AAEL010478	Down	-0.892796	0.226789	0.00101339
LOC5568166	AAEL006609	Down	-0.893098	0.215046	0.000769385
LOC110680940	AAEL025213	Down	-0.907889	0.256218	0.00248492
LOC5572949	AAEL010171	Down	-0.922354	0.302556	0.00259608
LOC5574677	AAEL011319	Down	-0.935532	0.29349	0.004999
LOC5570667	AAEL008486	Down	-0.941585	0.316342	0.00639872
LOC5565453	AAEL000667	Down	-0.942369	0.138761	9.04555e-05
LOC5564768	AAEL004434	Down	-0.955563	0.194488	0.000339508
LOC5580019	AAEL009645	Down	-0.959145	0.150926	7.77663e-05
LOC5564242	AAEL004188	Down	-0.961501	0.216538	0.000542564
LOC5565203	AAEL004665	Down	-0.961631	0.255368	0.00221139
LOC5571275	AAEL001577	Down	-0.96274	0.126518	0.000119764
LOC5568256	AAEL006691	Down	-0.967813	0.139819	9.47397e-05
LOC23687671	AAEL017251	Down	-0.977128	0.322691	0.00419916
LOC23687505	AAEL017085	Down	-0.979121	0.309965	0.00739852
LOC5579815	AAEL023500	Down	-1.00543	0.20953	0.000297229
LOC5572513	AAEL009850	Down	-1.00847	0.17706	0.000146798
LOC5566613	AAEL000757	Down	-1.00882	0.195742	6.0122e-05
LOC23687552	AAEL017132	Down	-1.01679	0.250462	0.000983808
CFI06_mgr02	-	Down	-1.0312	0.0548348	1.1828e-06
LOC5564337		Down	-1.03191	0.0930373	7.62079e-07
LOC5573256	AAEL010338	Down	-1.03362	0.132722	1.06946e-05
LOC5568254	AAEL006702	Down	-1.03379	0.116776	9.30295e-05
LOC110680939	AAEL004175	Down	-1.03767	0.299223	0.00221999
LOC5578507	AAEL013715	Down	-1.04125	0.442256	0.0203959
LOC5573583	AAEL002130	Down	-1.05832	0.184924	0.000159873
LOC5568403	AAEL006820	Down	-1.06185	0.145686	5.86786e-05
LOC5576104	AAEL002777	Down	-1.06431	0.293648	0.00264067
LOC5569518	AAEL007704	Down	-1.0709	0.315836	0.00305676
LOC5570366	AAEL008274	Down	-1.07476	0.1963	4.2027e-05
LOC5570654	AAEL008458	Down	-1.07694	0.345447	0.00639872
LOC5575706	AAEL012014	Down	-1.07704	0.323816	0.0029994
LOC5573312	AAEL010416	Down	-1.08696	0.163751	9.54161e-05
CFI06_mgr01	-	Down	-1.087	0.157308	4.03927e-05
LOC5578621	AAEL003599	Down	-1.10441	0.258433	0.0012712
LOC5570219	AAEL024456	Down	-1.10965	0.139284	3.71754e-05
LOC110675610	AAEL026008	Down	-1.11219	0.0929339	3.64233e-05
LOC5577251	AAEL013109	Down	-1.13015	0.281075	0.00127807
LOC5575615	AAEL019860	Down	-1.13385	0.226919	0.000367794
LOC5570960	AAEL008692	Down	-1.13754	0.205488	0.00023653
LOC5579101	AAEL003842	Down	-1.1437	0.143123	6.63858e-05
LOC110675611	AAEL026833	Down	-1.20771	0.150142	7.75845e-05
LOC110680755	AAEL011758	Down	-1.24184	0.310535	0.0011157
LOC5566457	AAEL005428	Down	-1.24468	0.11618	4.66008e-06
CFI06_mgp05	-	Down	-1.25816	0.155282	4.38941e-05
CFI06_mgp06	-	Down	-1.29412	0.154762	4.40518e-05
LOC5568045	AAEL026555	Down	-1.34335	0.287194	0.000282578
LOC5570678	AAEL008473	Down	-1.40255	0.251801	0.000119968
LOC5572674	AAEL009951	Down	-1.40752	0.285356	0.000269049
LOC5577135	AAEL003123	Down	-1.46098	0.146834	3.00878e-05
LOC110675609	AAEL021795	Down	-1.50288	0.117541	4.59065e-06
LOC5569048	AAEL007344	Down	-1.52214	0.232788	5.66201e-05
LOC5576246	AAEL002853	Down	-1.5239	0.290662	0.000235199
LOC5564196	AAEL014348	Down	-1.52536	0.28743	0.000430093
LOC5574193	AAEL002309	Down	-1.60096	0.171071	4.2078e-05
LOC110678573	AAEL025686	Down	-1.63126	0.310842	0.000105378
LOC110675128	AAEL026302	Down	-1.73885	0.111727	2.22886e-06
LOC5568476	AAEL006886	Down	-1.77763	0.226369	9.80186e-05
LOC5566497		Down	-1.83882	0.115593	4.68575e-07
LOC110677676		Down	-1.85755	0.214683	1.30297e-05
LOC5575307		Down	-1.86509	0.417324	0.000530058
LOC23687934	AAEL017514	Down	-2.20883	0.202817	8.66093e-06
LOC110674150		Down	-2.27133	0.286748	3.32036e-05
LOC110674148		Down	-2.42249	0.255006	1.97537e-05
LOC5566933		Down	-2.64084	0.477608	0.000183824
LOC5577707		Down	-3.07663	0.260566	9.56376e-06

## Sheet: Cardia-2
gene	VectorBase_ID	Regulation	de_coef	de_se	de_pval
LOC5570464		Up	1.54737	0.0890442	3.69943e-06
LOC5578307	AAEL013628	Up	1.08903	0.0500897	2.40109e-07
LOC110676293	AAEL003723	Up	0.946709	0.146762	0.000103153
LOC5570465	AAEL026904	Up	0.885179	0.0205228	9.97721e-08
LOC5571803	AAEL009330	Up	0.819787	0.0544289	9.56299e-07
LOC5564567	AAEL014516	Up	0.787396	0.0355634	0.000122415
LOC5574993	AAEL002534	Up	0.765081	0.0242828	0.000106181
LOC5571053	AAEL008769	Up	0.729922	0.094838	8.30366e-05
LOC5568663	AAEL007011	Up	0.71942	0.107681	8.08921e-05
LOC110676831	-	Up	0.709309	0.0704821	0.000467815
LOC5565804	AAEL005008	Up	0.696886	0.105577	8.14554e-05
LOC5577761	AAEL003298	Up	0.691637	0.102447	1.90323e-05
LOC110676297	AAEL027453	Up	0.671061	0.0989288	4.8089e-05
LOC5563695	AAEL000549	Up	0.664506	0.112658	0.000122359
LOC5568656	-	Up	0.634771	0.0395922	0.000225851
LOC5567927	AAEL006372	Up	0.610472	0.0918044	0.00021386
LOC110673978	AAEL006000	Up	0.60688	0.111752	0.000377453
LOC5565801	AAEL005001	Up	0.602494	0.10444	0.000115117
LOC5564226	-	Up	0.598784	0.0183771	2.44445e-06
LOC5566219	AAEL005255	Up	0.589025	0.0902851	0.000285998
LOC5564297	AAEL000590	Up	0.567197	0.094318	9.94911e-05
LOC5573855	AAEL010776	Up	0.560432	0.0881834	0.000260124
LOC5573409	AAEL026571	Up	0.557069	0.11335	0.000638147
LOC5575279	AAEL014896	Up	0.543847	0.089803	0.00177618
LOC5565892	AAEL000713	Up	0.523338	0.0641053	0.000120363
LOC5568538	AAEL006956	Up	0.522286	0.109927	0.000334268
LOC5576801	AAEL012778	Up	0.520203	0.105104	0.00025147
LOC5577078	AAEL012975	Up	0.511509	0.0886976	0.000373861
LOC5566484	AAEL005401	Up	0.509266	0.0396961	7.34252e-06
LOC5573536	AAEL010576	Up	0.505268	0.0866463	0.00016252
LOC5563953	AAEL004031	Up	0.503117	0.0760326	0.00118239
LOC5566121	AAEL005185	Up	0.498596	0.111342	0.000323514
LOC5569925	AAEL027654	Up	0.476633	0.0528856	4.26235e-05
LOC23687857	AAEL017437	Up	0.475982	0.0698374	3.59122e-05
LOC5577377	AAEL000428	Up	0.471148	0.0682191	8.84833e-05
LOC5573778	AAEL000293	Up	0.469523	0.0865115	0.000295345
LOC5574167	AAEL010977	Up	0.467869	0.0320841	0.000207218
LOC5570108	AAEL020238	Up	0.467647	0.0165675	9.66779e-05
LOC5576921	AAEL012859	Up	0.467513	0.0837304	0.000400067
LOC5570432	AAEL008329	Up	0.466263	0.0159772	8.38179e-05
LOC5577309	AAEL013158	Up	0.465733	0.032525	0.000216551
LOC5569531	AAEL007715	Up	0.46094	0.014783	9.56327e-05
LOC5576417	AAEL018241	Up	0.457997	0.0792778	0.000372648
LOC110676505	AAEL020800	Up	0.456437	0.103946	0.000391227
LOC5575585	AAEL019950	Up	0.450471	0.118736	0.00125846
LOC5569091	AAEL007355	Up	0.450368	0.108421	0.000605883
LOC5572968	AAEL010168	Up	0.448602	0.0136183	6.92609e-07
LOC5575687	AAEL013713	Up	0.44802	0.0678095	8.801e-05
LOC5572000	AAEL009486	Up	0.447787	0.111901	0.000267119
LOC5565578	AAEL014893	Up	0.447597	0.0603873	6.47309e-05
LOC5565025	AAEL014702	Up	0.447221	0.115086	0.00141106
LOC5565307	AAEL004716	Up	0.446382	0.120404	0.0017787
LOC5566525	AAEL005455	Up	0.443767	0.0928432	0.000213074
LOC5578343	AAEL003514	Up	0.440264	0.0965385	0.000882747
LOC110680425	AAEL020981	Up	0.436463	0.118985	0.00172874
LOC5569780	AAEL007926	Up	0.428658	0.0661273	0.00125145
LOC5570792	AAEL008562	Up	0.428455	0.123071	0.00226493
LOC5574612	AAEL011255	Up	0.424524	0.0822122	0.000207234
LOC5566780	AAEL015247	Up	0.423748	0.103893	0.00111575
LOC5575778	AAEL021746	Up	0.423691	0.126396	0.00215075
LOC5573501	AAEL022033	Up	0.422327	0.111938	0.00156655
LOC5569762	AAEL025391	Up	0.417607	0.0696013	0.000119493
LOC5572519	AAEL009847	Up	0.41682	0.0745512	0.000256284
LOC5577200	AAEL013083	Up	0.413625	0.0999612	0.00148092
LOC5563791	AAEL003944	Up	0.412573	0.110092	0.00113499
LOC5572725	AAEL009994	Up	0.411692	0.018919	3.05228e-06
LOC5571006	AAEL008738	Up	0.408981	0.0672271	1.80313e-05
LOC5568522	AAEL006934	Up	0.406043	0.125949	0.00359827
LOC5566773	AAEL005628	Up	0.402774	0.121594	0.00210634
LOC5580192	AAEL002551	Up	0.40074	0.0714848	0.000161985
LOC5570893	AAEL019550	Up	0.395137	0.0862035	0.000601615
LOC110677919	AAEL020749	Up	0.390419	0.0148156	5.7291e-05
LOC5566341	AAEL005329	Up	0.388421	0.0837618	0.000348241
LOC5564492	AAEL004294	Up	0.38659	0.0706368	0.0019237
LOC5569483	AAEL007667	Up	0.385785	0.115377	0.00263668
LOC5568487	AAEL006902	Up	0.383986	0.0804513	0.000371503
LOC5573818	AAEL010738	Up	0.383061	0.0880519	0.000998779
LOC5578793	AAEL003676	Up	0.382442	0.0678884	0.000459716
LOC5574432	AAEL019610	Up	0.374411	0.124935	0.00379924
LOC5567396	AAEL006053	Up	0.373276	0.0615253	1.72123e-05
LOC5566251	AAEL015110	Up	0.3691	0.0786948	0.00018863
LOC5565301	AAEL004715	Up	0.36816	0.0891106	0.000693079
LOC5570824	AAEL008600	Up	0.362607	0.0858334	0.00150815
LOC5579146	AAEL014022	Up	0.361668	0.102957	0.00291456
LOC5572998	AAEL019851	Up	0.361601	0.124038	0.004999
LOC5569945	AAEL008041	Up	0.360195	0.117141	0.00479904
LOC5572534	AAEL009859	Up	0.359299	0.0377281	8.24184e-06
LOC5579654	AAEL003970	Up	0.357095	0.0599276	0.000190808
LOC5568326	AAEL019731	Up	0.357093	0.105629	0.00234874
LOC5573218	AAEL019713	Up	0.357026	0.123528	0.00679864
LOC110674569	AAEL020789	Up	0.353111	0.0687521	0.00208245
LOC5576570	AAEL012621	Up	0.352351	0.107622	0.00240502
LOC5572655	AAEL001837	Up	0.351961	0.112823	0.00519896
LOC5567470	AAEL000947	Up	0.3518	0.0812941	0.000650332
LOC5567163	AAEL005901	Up	0.351374	0.0181142	9.89683e-06
LOC5568556	AAEL001126	Up	0.351133	0.0912411	0.0012245
LOC5578313	AAEL013625	Up	0.351014	0.0165698	3.13798e-07
LOC5575611	AAEL027674	Up	0.350242	0.0698735	0.000331039
LOC23687936	AAEL017516	Up	0.349643	0.0161835	0.000136194
LOC5569529	AAEL007699	Up	0.347277	0.0150995	2.59036e-07
LOC5578505	AAEL013703	Up	0.34609	0.0400164	3.72349e-05
LOC110678983	AAEL025807	Up	0.345801	0.0579619	0.000251829
LOC5565741	AAEL004967	Up	0.343786	0.0869241	0.000835433
LOC5569249	AAEL020508	Up	0.343263	0.123527	0.00459908
LOC5569547	AAEL007718	Up	0.341797	0.0595467	0.0003212
LOC5580329	AAEL013069	Up	0.339752	0.0196446	2.09465e-05
LOC5575642	AAEL011985	Up	0.338975	0.075147	0.000646253
LOC5578833	AAEL013876	Up	0.338929	0.0489992	7.0592e-05
LOC5573673	AAEL019604	Up	0.338857	0.0487537	2.81598e-05
LOC5568481	AAEL006879	Up	0.338351	0.0626075	0.000579219
LOC5564544	AAEL004319	Up	0.33511	0.113121	0.00519896
LOC110677076	AAEL023112	Up	0.333611	0.130468	0.0121976
LOC5578532	AAEL013739	Up	0.332212	0.0638328	0.000414398
LOC110677764	AAEL024434	Up	0.331261	0.0143336	0.000145394
LOC23687442	AAEL017022	Up	0.329386	0.041869	4.37562e-05
LOC5564562	AAEL004305	Up	0.324678	0.114296	0.00379924
LOC5569056	AAEL007343	Up	0.310544	0.11164	0.00559888
LOC5571039	AAEL008784	Up	0.310215	0.0454128	0.00103864
LOC5569739	AAEL007881	Up	0.309653	0.0816144	0.00152749
LOC5570169	AAEL008141	Up	0.309269	0.123311	0.0117976
LOC23687432	AAEL017012	Up	0.307057	0.101375	0.00279944
LOC5577396	AAEL003163	Up	0.306816	0.117392	0.00859828
LOC5566015	AAEL005111	Up	0.305779	0.102096	0.00359928
LOC5575287	AAEL011750	Up	0.305372	0.0924574	0.00214288
LOC5575753	AAEL002723	Up	0.304957	0.107337	0.00819836
LOC5570070	AAEL001352	Up	0.302198	0.100877	0.00319936
LOC23687579	AAEL019825	Up	0.301796	0.104515	0.00619876
LOC5572744	AAEL021667	Up	0.300506	0.0654824	0.000360714
LOC5577250	AAEL027982	Up	0.29989	0.0792165	0.00128308
LOC5572843	AAEL010059	Up	0.299281	0.0585601	0.000341568
LOC5564556	AAEL004325	Up	0.298931	0.0175445	0.000114167
LOC5574388	AAEL011105	Up	0.298426	0.0678559	0.000597325
LOC5564842	AAEL018350	Up	0.297353	0.077712	0.001704
LOC5569850	AAEL007959	Up	0.296263	0.121509	0.020196
LOC5571386	AAEL009017	Up	0.296262	0.0747638	0.0010226
LOC5565224	AAEL004668	Up	0.296192	0.0767239	0.00116614
LOC5571844	AAEL001703	Up	0.2957	0.0287807	6.896e-06
LOC5565159	AAEL004613	Up	0.293863	0.118336	0.0185963
LOC5565605	AAEL023022	Up	0.292085	0.11674	0.014997
LOC5568987	AAEL007289	Up	0.290736	0.100166	0.00439912
LOC5567616	AAEL006196	Up	0.29056	0.101431	0.0069986
LOC5566514	AAEL005460	Up	0.289438	0.084843	0.0016813
LOC5566843	AAEL000823	Up	0.288379	0.0145212	8.16229e-07
LOC5567898	AAEL006342	Up	0.287755	0.0563794	0.000212968
LOC5565516	AAEL012284	Up	0.287398	0.124856	0.0269946
LOC5567473	AAEL000931	Up	0.285281	0.114687	0.0163967
LOC5578368	AAEL003530	Up	0.284029	0.0135825	0.00019735
LOC5568247	AAEL006663	Up	0.282805	0.0864788	0.00210952
LOC5574799	AAEL002487	Up	0.28207	0.0796664	0.00228914
LOC5578360	AAEL024675	Up	0.281805	0.0713209	0.00132401
LOC110675781	AAEL009968	Up	0.281372	0.108673	0.0111978
LOC5566981	AAEL019523	Up	0.279076	0.072292	0.00166812
LOC5565774	AAEL004988	Up	0.278974	0.0829825	0.0022839
LOC5566289	AAEL018120	Up	0.278775	0.0573474	0.00211678
LOC5573413	AAEL002047	Up	0.277593	0.0146593	2.91415e-05
LOC5574706	AAEL011347	Up	0.275529	0.0547842	0.000373342
LOC110676091	AAEL020757	Up	0.275037	0.0988104	0.00719856
LOC5577930	AAEL025363	Up	0.273901	0.0545872	0.000727472
LOC5578306	AAEL013623	Up	0.273421	0.0366599	0.000170606
LOC5580030	AAEL009653	Up	0.270903	0.0147562	0.000152711
LOC5575105	AAEL011656	Up	0.270661	0.0154859	1.72685e-07
LOC5566322	AAEL005289	Up	0.270191	0.0947735	0.0069986
LOC5568702	AAEL007055	Up	0.270051	0.0569073	0.000486341
LOC5571454	AAEL009099	Up	0.269265	0.125322	0.0391922
LOC5578575	AAEL013760	Up	0.268821	0.0751217	0.00126597
LOC5571955	AAEL026633	Up	0.268569	0.0550708	0.00045376
LOC5570243	AAEL008192	Up	0.267874	0.0167234	0.000143978
LOC5566236	AAEL005269	Up	0.26745	0.0348571	0.000653126
LOC5564749	AAEL014609	Up	0.267234	0.056373	0.000400421
LOC5576758	AAEL025553	Up	0.264141	0.0156424	0.000197016
LOC5569309	AAEL007556	Up	0.264068	0.102037	0.0117976
LOC5563590	AAEL000032	Up	0.263828	0.017404	0.000144083
LOC5578218	AAEL003454	Up	0.260178	0.128216	0.0471906
LOC110674016	AAEL022632	Up	0.258168	0.116717	0.0327934
LOC5579111	AAEL003835	Up	0.258122	0.089394	0.00679864
LOC5568452	AAEL006855	Up	0.258094	0.0849821	0.00459908
LOC5566976	AAEL005744	Up	0.257553	0.0795265	0.00343888
LOC5574903	AAEL019681	Up	0.256744	0.110057	0.0243951
LOC5565181	AAEL004646	Up	0.256387	0.117808	0.0357928
LOC5576237	AAEL018288	Up	0.256353	0.0612065	0.000795974
LOC5565208	AAEL019898	Up	0.256347	0.0493907	0.000169461
LOC5570686	AAEL008500	Up	0.255827	0.0743191	0.00183396
LOC5571922	AAEL009406	Up	0.254904	0.0992119	0.0105979
LOC110674831	AAEL026915	Up	0.253295	0.0503897	0.000258218
LOC5573872	AAEL010787	Up	0.251929	0.0276108	3.47568e-05
LOC5575790	AAEL012062	Up	0.251588	0.0294976	6.06702e-05
LOC5564809	AAEL014630	Up	0.250693	0.0909347	0.00859828
LOC5576452	AAEL012536	Up	0.250675	0.0773703	0.00583984
LOC5564753	AAEL006811	Up	0.25047	0.0840475	0.00459908
LOC23687788	AAEL017368	Up	0.250088	0.0828279	0.00360175
LOC5572090	AAEL009496	Up	0.250027	0.016974	1.42049e-07
LOC5577193	AAEL013075	Up	0.24851	0.0959278	0.0131974
LOC5564088	AAEL007501	Up	0.247221	0.123773	0.0467906
LOC5574223	AAEL012382	Up	0.246759	0.0939575	0.0111978
LOC5573211	AAEL010318	Up	0.246184	0.0235349	3.71442e-05
LOC5575037	AAEL011587	Up	0.245148	0.0150685	8.3052e-05
LOC5571140	AAEL008854	Up	0.24455	0.0997595	0.0183963
LOC5573494	AAEL027554	Up	0.242828	0.0856207	0.00919816
LOC5564792	AAEL004445	Up	0.242684	0.0952784	0.0127974
LOC5573374	AAEL010464	Up	0.24035	0.0571365	0.00108716
LOC5576012	AAEL012234	Up	0.240301	0.102302	0.0277944
LOC5577356	AAEL000417	Up	0.239886	0.0686211	0.00200566
LOC5576896	AAEL003039	Up	0.238095	0.0638738	0.000986104
LOC5577034	AAEL012944	Up	0.23727	0.0155144	5.16746e-06
LOC5572857	AAEL010070	Up	0.235475	0.0325874	0.000680376
LOC5573038	AAEL025993	Up	0.233395	0.0952548	0.0177964
LOC5574844	AAEL011447	Up	0.2332	0.0137713	0.000302216
LOC5571990	AAEL009458	Up	0.230131	0.10418	0.0315937
LOC5573467	AAEL010506	Up	0.229973	0.0921984	0.0171966
LOC5570675	AAEL008481	Up	0.229617	0.0142616	0.000288562
LOC5567109	AAEL005832	Up	0.2294	0.0716454	0.00340076
LOC5579796	AAEL003976	Up	0.228244	0.0893339	0.0157968
LOC5567636	AAEL024235	Up	0.227796	0.0957034	0.0233953
LOC5572048	AAEL024346	Up	0.226792	0.102457	0.0331934
LOC5568303	AAEL006751	Up	0.226026	0.0817678	0.00679864
LOC5570007	AAEL000175	Up	0.225133	0.0565145	0.00067457
LOC5571884	AAEL009362	Up	0.224186	0.103451	0.035193
LOC5565474	AAEL002495	Up	0.223071	0.0320742	0.000639365
LOC5566959	AAEL005722	Up	0.222391	0.0153696	0.000203581
LOC5569661	AAEL007816	Up	0.221512	0.0773404	0.00539892
LOC5574747	AAEL019990	Up	0.218399	0.0871054	0.015197
LOC5574648	AAEL011288	Up	0.21659	0.028422	4.36749e-05
LOC5568583	AAEL001113	Up	0.216536	0.0449658	0.00227338
LOC5580259	AAEL012585	Up	0.216215	0.0154783	0.00021239
LOC5576943	AAEL018699	Up	0.214977	0.0814613	0.0143971
LOC5573200	AAEL001998	Up	0.209766	0.0419969	0.000216283
LOC5578654	AAEL024913	Up	0.209332	0.0849408	0.0137972
LOC5565927	AAEL005069	Up	0.208914	0.041797	0.000326895
LOC110679492	AAEL023003	Up	0.208579	0.0659016	0.00259948
LOC5577996	AAEL003396	Up	0.207799	0.0135055	0.000252859
LOC5576917	AAEL012860	Up	0.207315	0.0319149	0.00105818
LOC5571265	AAEL001588	Up	0.206526	0.0762957	0.00859828
LOC5574966	AAEL002527	Up	0.205802	0.0780504	0.0141972
LOC5571564	AAEL009151	Up	0.204717	0.0147468	0.00038194
LOC5575986	AAEL002764	Up	0.20459	0.0641703	0.00459908
LOC5570528	AAEL001427	Up	0.203796	0.0939577	0.0291942
LOC5567469	AAEL000950	Up	0.202976	0.0777759	0.0115977
LOC5567505	AAEL006118	Up	0.202128	0.10146	0.0475905
LOC5564750	AAEL014614	Up	0.202117	0.0514845	0.00108157
LOC5572365	AAEL009747	Up	0.200677	0.0162484	1.27598e-05
LOC5569740	AAEL022979	Up	0.199432	0.0895485	0.0371926
LOC5576203	AAEL012398	Up	0.198681	0.0686814	0.00619876
LOC5566099	AAEL015065	Up	0.196885	0.0835862	0.0243951
LOC5569675	AAEL019596	Up	0.193625	0.0953271	0.0467906
LOC5578801	AAEL003646	Up	0.193356	0.0605461	0.00259948
LOC5576653	AAEL012686	Up	0.192566	0.0146244	7.66468e-06
LOC5571687	AAEL009212	Up	0.192314	0.0690886	0.0069986
LOC5578839	AAEL019482	Up	0.191759	0.055382	0.00154375
LOC5563910	AAEL003986	Up	0.191019	0.0639149	0.00579884
LOC5577917	AAEL003326	Up	0.190937	0.0951082	0.0491902
LOC110681498	AAEL023347	Up	0.19085	0.0770208	0.0185963
LOC5567848	AAEL000987	Up	0.190313	0.0141956	0.000327891
LOC5570922	AAEL001503	Up	0.189766	0.0742877	0.0131974
LOC5575831	AAEL012099	Up	0.1895	0.0412843	0.000478915
LOC5572374	AAEL009764	Up	0.189274	0.0833601	0.0341932
LOC5570339	AAEL019977	Up	0.186503	0.0534539	0.00286909
LOC5570313	AAEL008248	Up	0.18599	0.073546	0.0175965
LOC110678949	AAEL022104	Up	0.185461	0.0710001	0.014797
LOC5565400	AAEL004783	Up	0.18505	0.0256293	0.000102785
LOC5577278	AAEL027786	Up	0.184963	0.0886178	0.0417916
LOC110676232	AAEL023983	Up	0.183909	0.0160078	0.000414343
LOC5579853	AAEL005845	Up	0.18387	0.0484766	0.00165073
LOC5568103	AAEL006538	Up	0.175791	0.0587507	0.00519896
LOC5568577	AAEL022849	Up	0.175724	0.0873841	0.0469906
LOC5571230	AAEL019485	Up	0.175703	0.0827476	0.0415917
LOC5575647	AAEL011980	Up	0.175242	0.0721376	0.014797
LOC5578857	AAEL027402	Up	0.174929	0.029883	0.000247544
LOC5577354	AAEL000424	Up	0.174744	0.0613096	0.00739852
LOC5571882	AAEL012134	Up	0.174576	0.0820951	0.044791
LOC5564179	AAEL004141	Up	0.171516	0.0757306	0.0237952
LOC5564921	AAEL004500	Up	0.170718	0.0221741	6.16277e-05
LOC5573217	AAEL010299	Up	0.169134	0.0141771	9.49757e-06
LOC5576344	AAEL002859	Up	0.168772	0.0750475	0.0323935
LOC23687673	AAEL014271	Up	0.167438	0.055606	0.00539892
LOC5576498	AAEL012549	Up	0.166807	0.072837	0.0311938
LOC5570978	AAEL008705	Up	0.166452	0.0584139	0.00919816
LOC5579800	AAEL003953	Up	0.162666	0.071612	0.0335933
LOC5577203	AAEL013102	Up	0.16195	0.0613715	0.0129974
LOC5575274	AAEL011746	Up	0.160287	0.0554983	0.00679864
LOC5567070	AAEL005817	Up	0.159979	0.0144247	0.000397146
LOC5565624	AAEL014292	Up	0.156155	0.0151788	4.66359e-05
LOC5576362	AAEL002879	Up	0.156129	0.0458559	0.00530923
LOC5571846	AAEL023681	Up	0.15548	0.0150718	0.000373618
LOC5570746	AAEL008542	Up	0.155344	0.0717326	0.0363927
LOC5576214	AAEL002827	Up	0.155054	0.0433937	0.00184528
LOC5564865	AAEL018323	Up	0.154189	0.0714428	0.0459908
LOC5563786	AAEL003942	Up	0.154051	0.013196	0.000460226
LOC5575820	AAEL012093	Up	0.152188	0.0662791	0.0235953
LOC5568046	AAEL006483	Up	0.151943	0.0262155	0.0013642
LOC5566474	AAEL005400	Up	0.147689	0.0560114	0.0159968
LOC5573974	AAEL010821	Up	0.144762	0.015944	0.000653185
LOC5570822	AAEL008610	Up	0.143774	0.0480321	0.00379924
LOC5570139	AAEL008103	Up	0.142802	0.0145333	0.000630732
LOC5574866	AAEL011471	Up	0.142278	0.0128931	0.000315461
LOC5573963	AAEL010826	Up	0.142105	0.0529988	0.0113977
LOC5567501	AAEL006115	Up	0.141455	0.0451737	0.00319936
LOC5574665	AAEL011309	Up	0.140891	0.0679358	0.0435913
LOC5577478	AAEL013221	Up	0.140803	0.013571	0.000660648
LOC5576572	AAEL025570	Up	0.139768	0.0490148	0.00619876
LOC5576901	AAEL014640	Up	0.137557	0.0546319	0.0171966
LOC5565979	AAEL005097	Up	0.136851	0.0160836	0.000710544
LOC5570887	AAEL018161	Up	0.136687	0.0588446	0.0329934
LOC23687867	AAEL017447	Up	0.136297	0.0484272	0.004999
LOC5565754	AAEL014965	Up	0.134576	0.0639257	0.0459908
LOC5578625	AAEL003582	Up	0.132973	0.0162714	2.82936e-05
LOC5570505	AAEL001411	Up	0.130711	0.0519306	0.0175965
LOC23687536	AAEL017116	Up	0.124526	0.0513978	0.0213957
LOC23687495	AAEL017075	Up	0.122934	0.0424772	0.00539892
LOC5567476	AAEL000948	Up	0.119926	0.036133	0.0029994
LOC5575450	AAEL002639	Up	0.119865	0.015808	0.0010665
LOC5569582	AAEL007771	Up	0.11755	0.014661	0.00010329
LOC5573990	AAEL010840	Up	0.116826	0.0472137	0.0129974
LOC5571937	AAEL009422	Up	0.111317	0.0448801	0.0179964
LOC5579186	AAEL003872	Up	0.110973	0.0193302	0.0010418
LOC5573418	AAEL002083	Up	0.110914	0.0396681	0.00759848
LOC5575822	AAEL012092	Up	0.109597	0.0436326	0.0257948
LOC5573827	AAEL010756	Up	0.107291	0.0137422	0.00112518
LOC5570244	AAEL008188	Up	0.103783	0.0134557	0.00067127
LOC5578401	AAEL013689	Up	0.103441	0.029695	0.00199492
LOC5579525	AAEL014562	Up	0.102133	0.0143698	1.10189e-05
LOC5566087	AAEL005165	Up	0.101841	0.029699	0.00291747
LOC5565544	AAEL004855	Up	0.101627	0.0149135	0.00121292
LOC5565700	AAEL004930	Up	0.100316	0.0383202	0.0165967
LOC5577566	AAEL013272	Up	0.0984013	0.015976	0.00144371
LOC5564925	AAEL019568	Up	0.0897471	0.0308745	0.00639872
LOC5569750	AAEL007915	Up	0.0896309	0.0367105	0.0253949
LOC23687618	AAEL017198	Up	0.0854266	0.0126722	0.00126871
LOC5568090	AAEL006511	Up	0.0846942	0.0131939	0.000949408
LOC5574485	AAEL002372	Up	0.0824944	0.0153129	0.00163509
LOC5568471	AAEL006885	Up	0.0661803	0.0238907	0.0129974
LOC5578243	AAEL015006	Up	0.0654747	0.014526	0.00329697
LOC5573763	AAEL000269	Up	0.0643845	0.0264578	0.0259948
LOC5566522	AAEL005451	Up	0.0621544	0.013337	0.00246111
LOC5577723	AAEL013359	Up	0.0614897	0.0219737	0.014997
LOC5566092	AAEL005170	Up	0.0611619	0.0273786	0.0373925
LOC5574515	AAEL019717	Up	0.0601585	0.0232685	0.0163967
LOC110678734	AAEL019403	Up	0.0552536	0.019688	0.0145971
LOC5565553	AAEL022140	Up	0.0460136	0.0109105	0.00476609
LOC5568260	AAEL006698	Up	0.0432791	0.0144142	0.00979804
LOC5566228	AAEL005266	Up	0.0388228	0.0148845	0.0283943
LOC5566772	AAEL005629	Up	0.0378171	0.0134554	0.0263947
LOC5564713	AAEL014583	Down	-0.0347616	0.0135093	0.0059988
LOC5578123	AAEL003427	Down	-0.0424422	0.0132607	0.00383627
LOC5573732	AAEL000291	Down	-0.0485983	0.0264927	0.0453909
LOC5565701	AAEL014944	Down	-0.05291	0.0231012	0.0145971
LOC5579810	AAEL005515	Down	-0.0574618	0.0307768	0.0411918
LOC110677182	-	Down	-0.0605586	0.0191234	0.00264957
LOC5579836	AAEL005868	Down	-0.0648636	0.0300976	0.0207958
LOC110676270	AAEL023490	Down	-0.0681141	0.0376616	0.0465907
LOC5569847	AAEL007962	Down	-0.0728298	0.0369456	0.0379924
LOC5575914	AAEL012175	Down	-0.0791197	0.0303367	0.00419916
LOC5569738	AAEL007868	Down	-0.0791216	0.0363364	0.0213957
LOC5574458	AAEL011180	Down	-0.0805509	0.02397	0.00120666
LOC5567491	AAEL000951	Down	-0.0825286	0.0222218	0.00107763
LOC5575242	AAEL011711	Down	-0.0830762	0.0353177	0.0131974
LOC5580084	AAEL002165	Down	-0.0852777	0.0446975	0.0485903
LOC5571927	AAEL020290	Down	-0.0897944	0.014463	0.000157241
LOC5578082	AAEL003423	Down	-0.0922199	0.0385814	0.0187962
LOC5576046	AAEL014932	Down	-0.0933769	0.0266328	0.00168546
LOC5567660	AAEL012740	Down	-0.0937569	0.0183233	8.91938e-05
LOC5577178	AAEL013047	Down	-0.0975985	0.0509146	0.0367926
LOC5575162	AAEL000328	Down	-0.100356	0.0489006	0.034993
LOC5570053	AAEL000204	Down	-0.101183	0.0351195	0.00379924
LOC5568708	AAEL007054	Down	-0.10167	0.0411478	0.0125975
LOC5566373	AAEL005353	Down	-0.101795	0.0431099	0.0133973
LOC5569240	AAEL024535	Down	-0.102237	0.0430133	0.0179964
LOC5564636	AAEL004378	Down	-0.102882	0.0407757	0.0105979
LOC5573190	AAEL001959	Down	-0.104008	0.0486155	0.0233953
LOC5569248	AAEL007502	Down	-0.104643	0.053671	0.0411918
LOC5565454	AAEL000647	Down	-0.104895	0.0257429	0.000274238
LOC5567821	AAEL000986	Down	-0.105087	0.0460627	0.0177964
LOC5565441	AAEL000641	Down	-0.106175	0.0371209	0.00439912
LOC23687839	AAEL017419	Down	-0.106368	0.0331959	0.00206083
LOC5572296	AAEL001767	Down	-0.10657	0.0409094	0.00619876
LOC5570363	AAEL008278	Down	-0.107954	0.0406271	0.00619876
LOC5580331	AAEL013074	Down	-0.108715	0.0510235	0.0311938
LOC5578234	AAEL013571	Down	-0.109206	0.0375219	0.00259948
LOC5577777	AAEL003285	Down	-0.109342	0.0479467	0.0161968
LOC5577999	AAEL003393	Down	-0.109619	0.0353981	0.0022977
LOC5576223	AAEL002825	Down	-0.113063	0.0454431	0.00959808
LOC23687450	AAEL017030	Down	-0.114248	0.0494637	0.0155969
LOC5579043	AAEL013987	Down	-0.114612	0.0506334	0.0189962
LOC5577113	AAEL008697	Down	-0.115484	0.0263076	0.00066209
LOC5569950	AAEL008039	Down	-0.116039	0.0274156	0.00139903
LOC5567286	AAEL005946	Down	-0.117067	0.0505352	0.014797
LOC5576360	AAEL002860	Down	-0.117069	0.0455387	0.00539892
LOC5577369	AAEL000454	Down	-0.117117	0.0599658	0.0369926
LOC5576353	AAEL002881	Down	-0.118547	0.0226357	0.000247653
LOC5577407	AAEL003161	Down	-0.119081	0.0579216	0.0269946
LOC5579190	AAEL003899	Down	-0.119626	0.060507	0.0363927
LOC5564317	AAEL000568	Down	-0.120588	0.064939	0.0473905
LOC5570115	AAEL008080	Down	-0.121038	0.0439219	0.00539892
LOC5571571	AAEL009160	Down	-0.124189	0.038186	0.00265045
LOC5572383	AAEL009772	Down	-0.124203	0.0563833	0.0229954
LOC5576744	AAEL024536	Down	-0.125969	0.014942	0.000751963
LOC5570277	AAEL008195	Down	-0.127491	0.0600765	0.0319936
LOC110674166	AAEL020485	Down	-0.128912	0.0604464	0.0219956
LOC5578121	AAEL003431	Down	-0.129945	0.0643097	0.0389922
LOC5574290	AAEL011051	Down	-0.130516	0.0643267	0.0307938
LOC5568465	AAEL006860	Down	-0.130841	0.0161237	0.000731197
LOC5575995	AAEL002761	Down	-0.132493	0.0470421	0.00459908
LOC5576107	AAEL002813	Down	-0.134936	0.0310578	0.000661629
LOC5570048	AAEL000191	Down	-0.139851	0.0718149	0.045191
LOC5575512	AAEL011881	Down	-0.140638	0.0622913	0.0179964
LOC5566493	AAEL005432	Down	-0.141497	0.0369395	0.000822678
LOC5569180	AAEL007444	Down	-0.14272	0.0250365	0.000202774
LOC5569514	AAEL007702	Down	-0.143004	0.0614062	0.0139972
LOC5565048	AAEL004567	Down	-0.144524	0.0616618	0.0163967
LOC5570653	AAEL008461	Down	-0.145323	0.0484086	0.00259948
LOC5572748	AAEL010032	Down	-0.145694	0.0561525	0.0069986
LOC5572867	AAEL010087	Down	-0.1457	0.0595508	0.0131974
LOC5565848	AAEL005038	Down	-0.146015	0.0747079	0.0377924
LOC5569466	AAEL007662	Down	-0.148458	0.0682918	0.0225955
LOC5573319	AAEL010403	Down	-0.149617	0.0636222	0.0189962
LOC5577289	AAEL013139	Down	-0.149906	0.0294061	9.52593e-05
LOC5571907	AAEL009414	Down	-0.149984	0.0678855	0.0205959
LOC5575535	AAEL011905	Down	-0.150066	0.0331399	0.000228695
LOC5577482	AAEL013225	Down	-0.150277	0.071507	0.029994
LOC5566847	AAEL000795	Down	-0.150832	0.026028	0.000205664
LOC110681159	AAEL021894	Down	-0.151398	0.0821777	0.0475905
LOC5572284	AAEL001759	Down	-0.151498	0.0144792	4.51735e-06
LOC5575681	AAEL011992	Down	-0.152138	0.0372937	0.000266364
LOC5564993	AAEL004522	Down	-0.152833	0.0351268	0.000514824
LOC5571208	AAEL008893	Down	-0.153005	0.0502956	0.00279944
LOC5568526	AAEL006946	Down	-0.153428	0.0785826	0.039792
LOC5576414	AAEL012511	Down	-0.153667	0.0563017	0.00379924
LOC5578831	AAEL013875	Down	-0.153809	0.0293163	0.000552882
LOC5574976	AAEL002501	Down	-0.154275	0.0504053	0.00285759
LOC5567605	AAEL021812	Down	-0.154911	0.080555	0.0455909
LOC5578927	AAEL003750	Down	-0.155287	0.030896	0.000263385
LOC5576552	AAEL012610	Down	-0.155769	0.081124	0.0435913
LOC5568387	AAEL006771	Down	-0.15594	0.0555847	0.00519896
LOC5574178	AAEL019806	Down	-0.155962	0.0398929	0.000735848
LOC5580070	AAEL002160	Down	-0.156667	0.0643761	0.0135973
LOC5572759	AAEL010017	Down	-0.156745	0.033114	0.00158905
LOC5567495	AAEL000934	Down	-0.157213	0.0567232	0.00479904
LOC5570218	AAEL008153	Down	-0.157426	0.074517	0.0285943
LOC5568880	AAEL007184	Down	-0.15796	0.0563019	0.00439912
LOC5565962	AAEL005220	Down	-0.158166	0.016164	1.04101e-05
LOC5568784	AAEL007135	Down	-0.158725	0.05647	0.00419916
LOC5572082	AAEL009510	Down	-0.159021	0.0644622	0.0103979
LOC23687671	AAEL017251	Down	-0.159802	0.0763953	0.0311938
LOC5577613	AAEL003246	Down	-0.159905	0.0845295	0.0471906
LOC5573401	AAEL022051	Down	-0.161766	0.0823899	0.0409918
LOC5579060	AAEL013992	Down	-0.162365	0.0612288	0.0069986
LOC5564469	AAEL014452	Down	-0.162476	0.0609219	0.00579884
LOC110676984	AAEL010348	Down	-0.162763	0.0685107	0.014797
LOC5564542	AAEL004313	Down	-0.164565	0.062884	0.00659868
LOC5580068	AAEL002163	Down	-0.165041	0.0660755	0.010198
LOC5578596	AAEL013778	Down	-0.165702	0.0868069	0.0477904
LOC5569898	AAEL008002	Down	-0.166166	0.0517707	0.00287963
LOC5573830	AAEL010754	Down	-0.167212	0.0243457	9.04568e-05
LOC5567772	AAEL000143	Down	-0.167314	0.0765723	0.0227954
LOC5567587	AAEL006186	Down	-0.167741	0.0638826	0.00859828
LOC5569787	AAEL023098	Down	-0.16799	0.0689924	0.0109978
LOC5572521	AAEL009836	Down	-0.168192	0.03707	0.000361622
LOC5569310	AAEL007549	Down	-0.168514	0.0313588	0.00110208
LOC5576045	AAEL012272	Down	-0.169142	0.071333	0.0153969
LOC5567700	AAEL006274	Down	-0.169145	0.0534232	0.00295351
LOC5569745	AAEL007883	Down	-0.169797	0.036262	0.00021186
LOC5568654	AAEL007024	Down	-0.170727	0.0630135	0.00679864
LOC5572735	AAEL010012	Down	-0.170762	0.0398112	0.000474271
LOC5579795	AAEL003957	Down	-0.171312	0.0288107	0.000199999
LOC5578900	AAEL013904	Down	-0.171458	0.0570104	0.00259948
LOC5574626	AAEL011264	Down	-0.171753	0.0496235	0.00156735
LOC5564225	AAEL023037	Down	-0.172047	0.0857233	0.0407918
LOC5563966	AAEL004025	Down	-0.172374	0.0345552	0.000284938
LOC5566119	AAEL022497	Down	-0.173581	0.0707865	0.014797
LOC5576734	AAEL020340	Down	-0.173915	0.0462001	0.00299629
LOC5577910	AAEL003352	Down	-0.174107	0.0768969	0.020196
LOC5563960	AAEL004010	Down	-0.175491	0.0541848	0.00295031
LOC5577499	AAEL003193	Down	-0.175531	0.0578704	0.00239952
LOC5578974	AAEL019746	Down	-0.175649	0.0620064	0.0029994
LOC5574382	AAEL011099	Down	-0.176225	0.0618361	0.00539892
LOC5578922	AAEL003764	Down	-0.176272	0.0319757	0.000283493
LOC5575696	AAEL012010	Down	-0.176289	0.0450707	0.000585766
LOC110676221	AAEL026834	Down	-0.176716	0.0615872	0.00310407
LOC5573998	AAEL010834	Down	-0.176722	0.0929167	0.0477904
LOC5564767	AAEL004448	Down	-0.177144	0.0619914	0.00439912
LOC5575338	AAEL002615	Down	-0.177191	0.059581	0.00397941
LOC5572627	AAEL009946	Down	-0.177322	0.0637926	0.00639872
LOC5575777	AAEL002701	Down	-0.178092	0.0848136	0.0303939
LOC5579458	AAEL015404	Down	-0.17823	0.0916198	0.0369926
LOC5567124	AAEL023543	Down	-0.178495	0.0918637	0.0481904
LOC5567081	AAEL005808	Down	-0.178545	0.0774863	0.0169966
LOC5579263	AAEL011873	Down	-0.179247	0.0544219	0.00217073
LOC5566687	AAEL005558	Down	-0.179399	0.0381178	0.000377214
LOC5571609	AAEL009201	Down	-0.179517	0.0244441	0.000114776
LOC5568814	AAEL001194	Down	-0.179927	0.0846497	0.0281944
LOC5577630	AAEL003234	Down	-0.181076	0.0248756	3.05155e-05
LOC5567222	AAEL019724	Down	-0.182707	0.0896412	0.0319936
LOC5572937		Down	-0.182817	0.0913031	0.0457908
LOC5574978	AAEL002510	Down	-0.182907	0.0894113	0.0345931
LOC5579027	AAEL013966	Down	-0.183192	0.0572226	0.00210031
LOC5573757	AAEL000278	Down	-0.183235	0.0976991	0.0487902
LOC5579955	AAEL007592	Down	-0.183834	0.0932738	0.0443911
LOC5576841	AAEL012827	Down	-0.184337	0.0684551	0.00659868
LOC5568502	AAEL019567	Down	-0.184731	0.075861	0.0119976
LOC5579901	AAEL001052	Down	-0.185458	0.0693161	0.00419916
LOC5575843	AAEL012122	Down	-0.185533	0.085928	0.0291942
LOC5578806	AAEL013845	Down	-0.185828	0.083319	0.0239952
LOC110679171	AAEL009684	Down	-0.186173	0.0808825	0.014997
LOC5569700	AAEL007845	Down	-0.186584	0.0396726	0.000362457
LOC5578265	AAEL003493	Down	-0.18709	0.0894126	0.0359928
LOC5568726	AAEL007078	Down	-0.187189	0.0971992	0.0487902
LOC5575688	AAEL012007	Down	-0.188217	0.0746157	0.010198
LOC5568081	AAEL006516	Down	-0.188711	0.0688243	0.00419916
LOC5574929	AAEL011527	Down	-0.189011	0.0451003	0.000442837
LOC5565770	AAEL004986	Down	-0.189473	0.0789235	0.014997
LOC5573844	AAEL010778	Down	-0.189501	0.0595488	0.00249565
LOC5564726	AAEL004406	Down	-0.190423	0.085512	0.0227954
LOC5574484	AAEL002401	Down	-0.190612	0.0560288	0.00134646
LOC5580010	AAEL009637	Down	-0.19079	0.0327555	8.67633e-05
LOC5567167	AAEL005897	Down	-0.191485	0.0731489	0.00739852
LOC5568194	AAEL006611	Down	-0.192335	0.0912901	0.0335933
LOC5567961	AAEL006420	Down	-0.19236	0.0691691	0.00359928
LOC5569895	AAEL008006	Down	-0.192785	0.0315636	0.000242749
LOC5569629	AAEL007787	Down	-0.192945	0.0594933	0.00265414
LOC5574133	AAEL010951	Down	-0.193008	0.0857934	0.0223955
LOC5578960	AAEL013939	Down	-0.193223	0.067783	0.00359928
LOC5577270	AAEL019537	Down	-0.193604	0.0747573	0.0079984
LOC110676736	AAEL028202	Down	-0.19431	0.0496834	0.000339002
LOC5576220	AAEL002834	Down	-0.194599	0.0770746	0.00979804
LOC5578271	AAEL003491	Down	-0.194656	0.0861032	0.0245951
LOC5579854	AAEL005856	Down	-0.19511	0.0908563	0.0223955
LOC5564249	AAEL004195	Down	-0.195428	0.0456726	0.000662765
LOC5563589	AAEL000090	Down	-0.19564	0.0607836	0.00229217
LOC5573191	AAEL001968	Down	-0.195871	0.0975143	0.039992
LOC5570208	AAEL008169	Down	-0.195871	0.0826717	0.0175965
LOC5571500	AAEL001623	Down	-0.196623	0.0484782	0.000928434
LOC5576501	AAEL012552	Down	-0.197089	0.0906422	0.0229954
LOC5574345	AAEL002324	Down	-0.197206	0.0954577	0.0323935
LOC5573879	AAEL010801	Down	-0.197459	0.0309514	0.000139188
LOC5564255	AAEL004193	Down	-0.197613	0.0910715	0.0283943
LOC5564056	AAEL004059	Down	-0.198117	0.0515682	0.0007822
LOC5570809	AAEL008582	Down	-0.198143	0.10279	0.0463907
LOC5578941	AAEL003769	Down	-0.198507	0.0942705	0.0361928
LOC5574834	AAEL011433	Down	-0.198794	0.0925357	0.0255949
LOC5564976	AAEL004532	Down	-0.198949	0.0444129	0.000301662
LOC5576029	AAEL012262	Down	-0.199365	0.0488029	0.000418626
LOC5565108	AAEL004586	Down	-0.199461	0.0744458	0.0059988
LOC5573964	AAEL010819	Down	-0.199587	0.0287757	0.000120168
LOC5572903	AAEL010116	Down	-0.199588	0.099022	0.0495901
LOC5569122	AAEL007383	Down	-0.19967	0.0252326	4.90645e-05
LOC5569984	AAEL008073	Down	-0.199929	0.0429025	0.000863708
LOC5570989	AAEL008719	Down	-0.200192	0.0689834	0.0029994
LOC5578830	AAEL013872	Down	-0.200346	0.100835	0.0407918
LOC5579819	AAEL005520	Down	-0.201064	0.0812905	0.0113977
LOC5575152	AAEL029004	Down	-0.202183	0.0952472	0.0283943
LOC5569050	AAEL007349	Down	-0.202807	0.025561	8.26776e-05
LOC5564130	AAEL004102	Down	-0.203656	0.0653105	0.0029091
LOC23687735	AAEL017315	Down	-0.204297	0.059595	0.00144627
LOC5578582	AAEL013768	Down	-0.204518	0.0764845	0.00619876
LOC5566977	AAEL005739	Down	-0.204694	0.061863	0.00204321
LOC5578459	AAEL000486	Down	-0.204881	0.065825	0.00370494
LOC5577094	AAEL012996	Down	-0.20501	0.0575539	0.00142674
LOC5574912	AAEL002748	Down	-0.205269	0.0880376	0.019796
LOC5571304	AAEL008953	Down	-0.205367	0.0395321	0.000298647
LOC5573419	AAEL008406	Down	-0.205443	0.0928579	0.0205959
LOC5567861	AAEL006317	Down	-0.205448	0.109207	0.0487902
LOC5567531	AAEL027977	Down	-0.206412	0.0922292	0.0257948
LOC5572129	AAEL026603	Down	-0.206508	0.0926547	0.0225955
LOC5569674	AAEL007820	Down	-0.207209	0.0866526	0.0141972
LOC5571262	AAEL001569	Down	-0.207342	0.0580814	0.00126293
LOC5579514	AAEL015100	Down	-0.207853	0.0766012	0.00579884
LOC5576995	AAEL003066	Down	-0.208333	0.0779276	0.00639872
LOC5571745	AAEL009275	Down	-0.208656	0.0435983	0.000282762
LOC5565821	AAEL014989	Down	-0.209172	0.0607175	0.00215881
LOC5576650	AAEL012684	Down	-0.209197	0.0364479	4.7696e-05
LOC5578445	AAEL000478	Down	-0.209531	0.0999301	0.0343931
LOC5569632	AAEL007777	Down	-0.209884	0.0453359	0.000313081
LOC5573116	AAEL002031	Down	-0.210816	0.0472494	0.000555867
LOC5572463	AAEL001798	Down	-0.210902	0.0574737	0.00117303
LOC5565765	AAEL004973	Down	-0.21095	0.0585246	0.001153
LOC5568127	AAEL006550	Down	-0.210961	0.078831	0.0079984
LOC5576069	AAEL026118	Down	-0.211373	0.0368853	0.000344883
LOC5567883	AAEL006353	Down	-0.211517	0.0854734	0.0135973
LOC5564962	AAEL014889	Down	-0.213312	0.0549497	0.000926231
LOC5576673	AAEL026023	Down	-0.213354	0.0802119	0.00539892
LOC5575211	AAEL011677	Down	-0.213722	0.0914319	0.0141972
LOC5576221	AAEL002833	Down	-0.214059	0.0424522	0.00170186
LOC5572023	AAEL000219	Down	-0.214065	0.0388849	0.000139453
LOC5567383	AAEL006061	Down	-0.214831	0.0489153	0.000733372
LOC5571712	AAEL009244	Down	-0.214973	0.0275485	5.99868e-05
LOC5576765	AAEL012746	Down	-0.21563	0.0629002	0.00161123
LOC5576745	AAEL012731	Down	-0.216341	0.0653229	0.0020605
LOC5577439	AAEL019824	Down	-0.216537	0.110463	0.039992
LOC5577035	AAEL012943	Down	-0.216728	0.0815964	0.00559888
LOC5565148	AAEL004620	Down	-0.216859	0.0705724	0.0029994
LOC110676690	AAEL009150	Down	-0.217031	0.0569732	0.00117814
LOC5578893	AAEL013898	Down	-0.217196	0.0996988	0.0213957
LOC5568807	AAEL001177	Down	-0.21746	0.0857987	0.010198
LOC5577736	AAEL013369	Down	-0.217745	0.111269	0.0421916
LOC5576102	AAEL002779	Down	-0.218391	0.0743148	0.00279944
LOC5564878	AAEL004457	Down	-0.218792	0.0279375	2.05194e-05
LOC5570396	AAEL008291	Down	-0.219885	0.0778485	0.00359928
LOC5565330	AAEL014821	Down	-0.220013	0.0689417	0.00284774
LOC5574783	AAEL011414	Down	-0.220025	0.0341104	0.000875867
LOC5574421	AAEL011136	Down	-0.220313	0.0916302	0.0115977
LOC5574633	AAEL011276	Down	-0.220426	0.0827824	0.00779844
LOC5576039	AAEL012280	Down	-0.220496	0.0954856	0.0177964
LOC5580031	AAEL009647	Down	-0.221527	0.110556	0.0375925
LOC5571689	AAEL028066	Down	-0.221568	0.0420512	0.00173087
LOC5574597	AAEL002418	Down	-0.221731	0.0923368	0.015197
LOC5577327	AAEL000410	Down	-0.222137	0.0496531	0.000706776
LOC5570105	AAEL008078	Down	-0.222143	0.109484	0.0359928
LOC5575432	AAEL011830	Down	-0.222198	0.0773466	0.00479904
LOC5573437	AAEL010479	Down	-0.223044	0.0327748	0.000603995
LOC5564923	AAEL004496	Down	-0.223094	0.0765334	0.00319936
LOC5566166	AAEL005221	Down	-0.223121	0.0462636	0.000333283
LOC5574270	AAEL011038	Down	-0.223175	0.0938106	0.0145971
LOC5569998	AAEL000164	Down	-0.223205	0.102173	0.0265947
LOC5568054	AAEL006480	Down	-0.223222	0.0438458	0.000223203
LOC5569672	AAEL007822	Down	-0.224248	0.0871748	0.0109978
LOC5576866	AAEL019514	Down	-0.224647	0.056357	0.00101351
LOC5576010	AAEL012238	Down	-0.225629	0.0472085	0.000340398
LOC5577433	AAEL019845	Down	-0.225663	0.0491214	0.000507353
LOC5575668	AAEL002687	Down	-0.225867	0.0666554	0.00194136
LOC110678029	AAEL021557	Down	-0.226049	0.0538662	0.000291386
LOC5578622	AAEL003606	Down	-0.226136	0.106397	0.0379924
LOC5568098	AAEL006560	Down	-0.226151	0.0952271	0.014797
LOC5570019	AAEL000180	Down	-0.226839	0.116215	0.0425915
LOC5575980	AAEL012227	Down	-0.226865	0.0884536	0.0089982
LOC5570879	AAEL008651	Down	-0.227044	0.0654221	0.00150031
LOC5578388	AAEL013675	Down	-0.227224	0.0602496	0.000855023
LOC5573894	AAEL002184	Down	-0.22726	0.076808	0.0039992
LOC110674119	AAEL026582	Down	-0.227366	0.0971603	0.014797
LOC5578058	AAEL013494	Down	-0.227413	0.0801307	0.00519896
LOC5573615	AAEL010611	Down	-0.22862	0.0413799	0.00034794
LOC5573238	AAEL010330	Down	-0.228989	0.0628066	0.00107661
LOC5569269	AAEL007518	Down	-0.229881	0.100496	0.0213957
LOC5565619	AAEL014899	Down	-0.229921	0.0902588	0.00859828
LOC5564618	AAEL014541	Down	-0.230788	0.078461	0.00259948
LOC5573574	AAEL002118	Down	-0.231233	0.0623106	0.00103633
LOC5565652	AAEL004902	Down	-0.231285	0.0580115	0.000709857
LOC5564769	AAEL004438	Down	-0.231312	0.0903166	0.00979804
LOC5571567	AAEL009154	Down	-0.231811	0.0786646	0.00279944
LOC5578855	AAEL003709	Down	-0.231977	0.0847185	0.00579884
LOC5567698	AAEL006264	Down	-0.231995	0.0980531	0.0159968
LOC5564718		Down	-0.232092	0.0670028	0.00198886
LOC5566520	AAEL005457	Down	-0.23341	0.0573761	0.00300278
LOC5578104	AAEL003428	Down	-0.233704	0.0536111	0.000487903
LOC5572478	AAEL009808	Down	-0.233769	0.0538899	0.00262626
LOC5567448	AAEL006091	Down	-0.233815	0.0915925	0.00859828
LOC5578432	AAEL024475	Down	-0.233897	0.0968581	0.0129974
LOC5567637	AAEL006224	Down	-0.234514	0.0646822	0.0014353
LOC5569595	AAEL001245	Down	-0.234702	0.106368	0.0289942
LOC5580243	AAEL012327	Down	-0.234708	0.0941654	0.0133973
LOC5565180	AAEL004603	Down	-0.235178	0.0522525	0.000332021
LOC5577510	AAEL003180	Down	-0.2355	0.0808989	0.00239952
LOC5569575	AAEL007765	Down	-0.236456	0.0437398	0.000260817
LOC5568521	AAEL006928	Down	-0.237127	0.0641299	0.00146609
LOC5571409	AAEL009051	Down	-0.237605	0.0733782	0.00148387
LOC5579467	AAEL023603	Down	-0.237768	0.07473	0.00266786
LOC5564782	AAEL004427	Down	-0.237895	0.0726757	0.00141599
LOC5580280	AAEL003006	Down	-0.237956	0.0593991	0.000941454
LOC5574775	AAEL019795	Down	-0.2387	0.0970377	0.0127974
LOC5566059	AAEL005143	Down	-0.238712	0.0335911	0.000239251
LOC5570461	AAEL008356	Down	-0.23873	0.0819558	0.00359928
LOC5572672	AAEL001852	Down	-0.238894	0.063898	0.000863753
LOC5566973	AAEL005728	Down	-0.240696	0.114993	0.0329934
LOC5579902	AAEL001044	Down	-0.240758	0.100139	0.0139972
LOC5571502	AAEL001601	Down	-0.240937	0.116127	0.0325935
LOC5576631	AAEL019597	Down	-0.241201	0.0669247	0.00374088
LOC5572010	AAEL009476	Down	-0.241673	0.0448962	0.000358165
LOC5578139	AAEL013525	Down	-0.24185	0.0751639	0.0027181
LOC5567854	AAEL026069	Down	-0.241868	0.116813	0.0333933
LOC5564161	AAEL004148	Down	-0.242063	0.054915	0.000236642
LOC5577626	AAEL003210	Down	-0.243005	0.0386992	0.000254985
LOC5577489	AAEL013229	Down	-0.24395	0.0630014	0.000777949
LOC5567465	AAEL000942	Down	-0.244104	0.0634733	0.000716889
LOC5566799	AAEL005662	Down	-0.244666	0.0580445	0.000998416
LOC5577555	AAEL013267	Down	-0.245284	0.0414655	0.000213123
LOC5573533	AAEL010590	Down	-0.245386	0.0715128	0.00156555
LOC5576420	AAEL012507	Down	-0.245485	0.0766806	0.00217184
LOC5563837	AAEL027044	Down	-0.246286	0.091278	0.00719856
LOC5566677	AAEL022387	Down	-0.246387	0.0361748	0.000668439
LOC5572547	AAEL009872	Down	-0.246823	0.0902587	0.00519896
LOC5578096	AAEL003424	Down	-0.246954	0.0995453	0.00879824
LOC5577582	AAEL013287	Down	-0.247835	0.0550376	0.000341217
LOC5568112	AAEL006566	Down	-0.24786	0.0959653	0.009998
LOC23687552	AAEL017132	Down	-0.248276	0.123058	0.0439912
LOC5570063	AAEL001354	Down	-0.248287	0.072928	0.00209618
LOC23687660	AAEL021255	Down	-0.248428	0.113439	0.0231954
LOC5570947	AAEL008679	Down	-0.248585	0.0919409	0.00559888
LOC5571449	AAEL009085	Down	-0.248875	0.0826464	0.00279944
LOC5577985	AAEL013461	Down	-0.248917	0.0919508	0.004999
LOC5576310	AAEL012457	Down	-0.249113	0.0655007	0.000391044
LOC5569188	AAEL019609	Down	-0.249675	0.109365	0.0245951
LOC5577251	AAEL013109	Down	-0.249801	0.0484827	0.000178561
LOC5570631	AAEL022727	Down	-0.249856	0.0598933	0.000641224
LOC5563644	AAEL000077	Down	-0.250797	0.106528	0.0189962
LOC5572631	AAEL001840	Down	-0.25124	0.101853	0.0113977
LOC5574862	AAEL011468	Down	-0.251576	0.0305975	2.98389e-05
LOC5578594	AAEL013771	Down	-0.251729	0.104371	0.0137972
LOC5564033	AAEL004074	Down	-0.252327	0.112034	0.0215957
LOC5570223	AAEL008157	Down	-0.252502	0.110328	0.0223955
LOC5565702	AAEL014943	Down	-0.252803	0.0461522	0.000241576
LOC5578684	AAEL003645	Down	-0.25299	0.031592	0.000512496
LOC5576950	AAEL012904	Down	-0.253547	0.0558179	0.000188951
LOC110676030	AAEL024500	Down	-0.253993	0.0735012	0.00181995
LOC5571596	AAEL009185	Down	-0.254498	0.0344896	6.06819e-05
LOC5567928	AAEL006364	Down	-0.254502	0.0987327	0.0079984
LOC5574383	AAEL011102	Down	-0.254954	0.0467318	0.00027017
LOC5576472	AAEL002886	Down	-0.25557	0.0378318	0.00066596
LOC5567581	AAEL006174	Down	-0.255836	0.057711	0.000410064
LOC5567091	AAEL012313	Down	-0.25587	0.0510274	0.00149013
LOC5563763	AAEL014252	Down	-0.25639	0.116994	0.0267946
LOC5572525	AAEL009844	Down	-0.256958	0.0581369	0.000504088
LOC110675493	AAEL028043	Down	-0.258012	0.0160084	0.000251729
LOC5570821	AAEL008594	Down	-0.258202	0.0793528	0.00277927
LOC5580239	AAEL012326	Down	-0.258402	0.0254176	2.74981e-05
LOC5565629	AAEL014913	Down	-0.258627	0.0456099	0.000129422
LOC5566473	AAEL005414	Down	-0.259023	0.0594912	0.000320905
LOC5565931	AAEL025321	Down	-0.259043	0.0378715	0.000133782
LOC5574816	AAEL002464	Down	-0.259185	0.0355923	0.000589928
LOC5574385	AAEL011090	Down	-0.259433	0.0849921	0.00348759
LOC5577591	AAEL020476	Down	-0.259857	0.0643689	0.000603855
LOC5574550		Down	-0.259946	0.0693942	0.000801667
LOC5573678	AAEL010661	Down	-0.261621	0.0470983	0.000169047
LOC5572224	AAEL009658	Down	-0.262032	0.0598383	0.000225009
LOC110676327	AAEL027034	Down	-0.262508	0.1057	0.0121976
LOC110675667	AAEL024853	Down	-0.262536	0.0829631	0.00233873
LOC5565783	AAEL004985	Down	-0.262589	0.09108	0.0039992
LOC5569782	AAEL007920	Down	-0.262794	0.0717582	0.000723392
LOC5577139	AAEL003125	Down	-0.263115	0.0718033	0.00127145
LOC5573015	AAEL001916	Down	-0.263557	0.0673521	0.001057
LOC5576217	AAEL029007	Down	-0.263949	0.0803015	0.0027043
LOC5578837	AAEL013877	Down	-0.264296	0.106736	0.0105979
LOC5580034	AAEL010227	Down	-0.264379	0.073597	0.0014358
LOC5572581	AAEL009914	Down	-0.264585	0.110935	0.0207958
LOC5571226	AAEL008921	Down	-0.265263	0.0374194	7.04309e-05
LOC5564185	AAEL014335	Down	-0.265959	0.0775163	0.00171545
LOC5568648	AAEL007015	Down	-0.266126	0.0836229	0.00245277
LOC5567494	AAEL000941	Down	-0.266264	0.0422795	8.88194e-05
LOC5572732	AAEL009995	Down	-0.266554	0.106551	0.00859828
LOC5569427	AAEL007624	Down	-0.266874	0.102902	0.0069986
LOC5578667	AAEL003641	Down	-0.267173	0.0848981	0.00283809
LOC5577945	AAEL019754	Down	-0.268144	0.0820283	0.00177598
LOC5565337	AAEL014831	Down	-0.26832	0.0927902	0.00319936
LOC5579290	AAEL001544	Down	-0.268382	0.0906962	0.00239952
LOC5576042	AAEL012279	Down	-0.268686	0.0760812	0.00179119
LOC5570984	AAEL020513	Down	-0.268941	0.0489411	0.000120628
LOC5564166	AAEL004126	Down	-0.269743	0.0923832	0.00279944
LOC5575898	AAEL002737	Down	-0.271012	0.0243951	1.15418e-05
LOC5570433	AAEL019748	Down	-0.271397	0.0538103	0.00022653
LOC5575428	AAEL011832	Down	-0.271432	0.0715919	0.000857342
LOC5578758	AAEL003695	Down	-0.271652	0.107745	0.00919816
LOC5569604	AAEL001275	Down	-0.271884	0.0437966	0.000269685
LOC5565409	AAEL014847	Down	-0.272098	0.0636993	0.000552432
LOC5564065	AAEL004081	Down	-0.272697	0.077927	0.00107001
LOC5569237	AAEL026565	Down	-0.272933	0.024788	1.0217e-05
LOC5566137	AAEL005190	Down	-0.273677	0.0625297	0.000226988
LOC5572115	AAEL009530	Down	-0.273907	0.0745128	0.00112691
LOC5576263	AAEL019444	Down	-0.27397	0.10959	0.0123975
LOC5573804	AAEL010727	Down	-0.274672	0.0970813	0.00479904
LOC5565227	AAEL004662	Down	-0.275587	0.106417	0.0111978
LOC5575526	AAEL011900	Down	-0.27607	0.0899909	0.00282936
LOC5574975	AAEL002526	Down	-0.276646	0.0440618	0.000128005
LOC5575684	AAEL011995	Down	-0.277646	0.0670635	0.0010567
LOC5571916	AAEL021302	Down	-0.278462	0.108963	0.0111978
LOC5577719	AAEL013353	Down	-0.279123	0.0306777	5.58412e-05
LOC5578431	AAEL000516	Down	-0.27978	0.045453	0.000141698
LOC110678610	AAEL020450	Down	-0.280226	0.0971766	0.00379924
LOC5577458	AAEL013207	Down	-0.281278	0.0594327	0.000655876
LOC5573051	AAEL010220	Down	-0.28132	0.121045	0.0165967
LOC5569083	AAEL001209	Down	-0.281963	0.0334205	8.57715e-05
LOC110676279	AAEL021140	Down	-0.281975	0.0262407	0.000382609
LOC5567575	AAEL006171	Down	-0.282123	0.0480112	0.000412968
LOC5570848	AAEL008624	Down	-0.282265	0.0782438	0.00119112
LOC5567161	AAEL005900	Down	-0.282683	0.0708646	0.000548997
LOC5568998	AAEL025594	Down	-0.282705	0.069227	0.000831592
LOC5577675	AAEL013309	Down	-0.283151	0.091284	0.00343373
LOC5572561	AAEL009894	Down	-0.283612	0.112838	0.0139972
LOC5574109	AAEL002263	Down	-0.283679	0.0300039	0.00031984
LOC5570951	AAEL008674	Down	-0.283863	0.0664182	0.000664647
LOC5571557	AAEL009142	Down	-0.284517	0.0816126	0.00133744
LOC5570336	AAEL001382	Down	-0.284641	0.111902	0.0131974
LOC5566751	AAEL015238	Down	-0.28516	0.0535463	0.000340031
LOC5578269	AAEL003497	Down	-0.28573	0.0961944	0.0029994
LOC5575702	AAEL012016	Down	-0.286533	0.080113	0.00132994
LOC5578210	AAEL003483	Down	-0.28664	0.107309	0.00619876
LOC5575525	AAEL021608	Down	-0.287545	0.0830747	0.00186818
LOC5571537	AAEL009128	Down	-0.288084	0.0930498	0.00239952
LOC5572929	AAEL010148	Down	-0.2887	0.0635653	0.000733064
LOC5569042	AAEL007332	Down	-0.288799	0.0926052	0.00298658
LOC5568093	AAEL006507	Down	-0.290168	0.107052	0.00679864
LOC110678484	AAEL025246	Down	-0.290797	0.0826669	0.00146917
LOC5571397	AAEL009029	Down	-0.290844	0.0652084	0.000447513
LOC5573885	AAEL010798	Down	-0.29088	0.0609492	0.000284626
LOC5577537	AAEL013252	Down	-0.29144	0.115823	0.00979804
LOC5563706	AAEL003921	Down	-0.293483	0.093395	0.00292235
LOC5577364	AAEL000407	Down	-0.293645	0.089322	0.00158265
LOC5569119	AAEL007382	Down	-0.29406	0.0937713	0.0034398
LOC5569899	AAEL007990	Down	-0.294485	0.0672833	0.000117938
LOC5568633	AAEL007023	Down	-0.295023	0.0323394	9.71456e-06
LOC5570994	AAEL008740	Down	-0.295379	0.0652414	0.000373896
LOC5563849	AAEL014177	Down	-0.295431	0.0995875	0.00369773
LOC5576028	AAEL012266	Down	-0.295652	0.11697	0.0107978
LOC5577021	AAEL012940	Down	-0.29602	0.0456414	6.22358e-05
LOC5576963	AAEL003084	Down	-0.297168	0.106184	0.00439912
LOC5573210	AAEL010300	Down	-0.29738	0.113749	0.009998
LOC5564140	AAEL004083	Down	-0.297471	0.0800876	0.00148368
LOC5567885	AAEL006359	Down	-0.297507	0.0912872	0.00309958
LOC5566143	AAEL005213	Down	-0.297531	0.0622675	8.85348e-05
LOC5579924	AAEL006794	Down	-0.298183	0.0710054	0.00050409
LOC5577481	AAEL013220	Down	-0.298186	0.105892	0.00519896
LOC5580278	AAEL003011	Down	-0.298695	0.0470397	0.000220445
LOC5571930	AAEL009389	Down	-0.299238	0.0613154	0.000275055
LOC5569471	AAEL007660	Down	-0.299289	0.109345	0.00519896
LOC5578089	AAEL003434	Down	-0.299719	0.0535312	0.000143471
LOC5572640	AAEL001838	Down	-0.299958	0.0777963	0.00103239
LOC5570017	AAEL000208	Down	-0.30006	0.0481266	0.000208426
LOC5576837	AAEL012816	Down	-0.300107	0.0785464	0.00121481
LOC5571153	AAEL008849	Down	-0.301437	0.101938	0.00319936
LOC5568266	AAEL006688	Down	-0.302057	0.0812621	0.00101029
LOC5568408	AAEL006829	Down	-0.302218	0.037853	2.93108e-05
LOC5564793	AAEL004436	Down	-0.303748	0.0859065	0.00103994
LOC23687717	AAEL017297	Down	-0.304086	0.0881797	0.00186363
LOC5564118	AAEL004118	Down	-0.304381	0.0368461	3.92923e-05
LOC5564545	AAEL004308	Down	-0.304417	0.0654737	0.000402446
LOC23687965	AAEL017545	Down	-0.305139	0.0605882	0.000426336
LOC5569767	AAEL007893	Down	-0.305151	0.0728806	0.000479835
LOC5565095	AAEL004589	Down	-0.305239	0.0423692	0.0010157
LOC110678790	AAEL020582	Down	-0.305321	0.116699	0.00839832
LOC5570214	AAEL008154	Down	-0.305565	0.0619623	0.0003723
LOC5574120	AAEL022600	Down	-0.305752	0.104055	0.00439912
LOC110680525	AAEL011755	Down	-0.306281	0.0976769	0.00346493
LOC5574502	AAEL002375	Down	-0.308238	0.103214	0.0029994
LOC5572971	AAEL027157	Down	-0.309495	0.0851911	0.000910896
LOC5571889	AAEL009379	Down	-0.309793	0.077554	0.00084449
LOC5576078	AAEL012310	Down	-0.310264	0.0774812	0.000486128
LOC5566888	AAEL000807	Down	-0.310267	0.0757355	0.000986381
LOC5565372	AAEL004755	Down	-0.310274	0.0906619	0.000836768
LOC5566532	AAEL015202	Down	-0.310529	0.0671974	0.000290783
LOC110676274	AAEL021171	Down	-0.311022	0.103769	0.00359928
LOC5577267	AAEL013119	Down	-0.311202	0.0751887	0.000717404
LOC5578146	AAEL013527	Down	-0.311521	0.062025	0.000166224
LOC5566074	AAEL015061	Down	-0.312124	0.0764882	0.00034648
LOC5566122	AAEL005177	Down	-0.312671	0.071343	0.000624385
LOC5576100	AAEL002789	Down	-0.312882	0.0694758	0.000249351
LOC5571540	AAEL009127	Down	-0.312955	0.106814	0.00359928
LOC5571461	AAEL009092	Down	-0.31308	0.0848529	0.00147931
LOC5566855	AAEL000820	Down	-0.313265	0.0879506	0.00140931
LOC5563585	AAEL011221	Down	-0.313536	0.0965623	0.00186038
LOC5569049	AAEL007342	Down	-0.313808	0.0239115	2.43102e-05
LOC110676417	AAEL023209	Down	-0.314069	0.0763235	0.00072064
LOC5574333	AAEL002337	Down	-0.314083	0.0735877	0.000649732
LOC5579807	AAEL003954	Down	-0.314367	0.0552415	9.212e-05
LOC5568659	AAEL007019	Down	-0.314951	0.0562339	0.000556835
LOC5573863	AAEL010765	Down	-0.314993	0.0376647	2.20649e-05
LOC5568292	AAEL006721	Down	-0.315088	0.0862763	0.00113295
LOC5567857	AAEL006315	Down	-0.315189	0.0695372	0.000229527
LOC5567559	AAEL006158	Down	-0.315533	0.0330272	1.04723e-05
LOC5567259	AAEL005931	Down	-0.315607	0.0494813	0.000145622
LOC5570509	AAEL001432	Down	-0.315707	0.0515306	0.000170393
LOC5571418	AAEL009059	Down	-0.31618	0.0555655	6.83029e-05
LOC5574682	AAEL011314	Down	-0.316967	0.0763095	0.000378339
LOC110679834	AAEL008159	Down	-0.317062	0.0399675	4.9947e-05
LOC5578686	AAEL003634	Down	-0.317252	0.0803448	0.00114828
LOC5572256	AAEL020559	Down	-0.318154	0.0963937	0.0049165
LOC5571080	AAEL008787	Down	-0.318496	0.0462878	8.73549e-05
LOC5572512	AAEL009842	Down	-0.318578	0.0479548	0.000830224
LOC5565389	AAEL004777	Down	-0.318769	0.0512569	0.000225103
LOC5569124	AAEL007385	Down	-0.319087	0.0252458	1.01603e-05
LOC5570501	AAEL001394	Down	-0.319339	0.0955939	0.00238389
LOC5568019	AAEL006458	Down	-0.320164	0.0707566	0.000487854
LOC5567506	AAEL006113	Down	-0.320369	0.0941331	0.00149452
LOC5566723	AAEL015236	Down	-0.320522	0.0702063	0.00201018
LOC5575475	AAEL021703	Down	-0.320764	0.0692257	0.00208659
LOC5571789	AAEL009317	Down	-0.321536	0.050421	0.000135402
LOC5573866	AAEL010784	Down	-0.321721	0.117403	0.00379924
LOC5564078	AAEL014296	Down	-0.32245	0.0659407	0.000462993
LOC5567191	AAEL000915	Down	-0.323632	0.0563219	0.000158415
LOC5574368	AAEL011088	Down	-0.324347	0.0500403	0.000115081
LOC5573538	AAEL010582	Down	-0.324571	0.0597158	0.000148421
LOC5572173	AAEL009590	Down	-0.325427	0.0550642	0.000179525
LOC5577244	AAEL003142	Down	-0.325448	0.0959388	0.00219581
LOC5574995	AAEL002523	Down	-0.325929	0.075773	0.000460356
LOC5578151	AAEL013537	Down	-0.325945	0.117614	0.00579884
LOC5572982	AAEL001930	Down	-0.326715	0.0617738	0.000177228
LOC5571825	AAEL001698	Down	-0.327394	0.05591	0.000148712
LOC5573878	AAEL010799	Down	-0.328061	0.0367514	5.57464e-06
LOC5579259	AAEL015653	Down	-0.328617	0.102166	0.00234169
LOC5566608	AAEL000791	Down	-0.32964	0.071622	0.000485123
LOC5571983	AAEL025906	Down	-0.329666	0.0847194	0.000895317
LOC5567705	AAEL006279	Down	-0.329714	0.103629	0.00204432
LOC5564775	AAEL004425	Down	-0.329994	0.0952023	0.00199891
LOC5565878	AAEL000679	Down	-0.330093	0.0519825	6.18666e-05
LOC5576972	AAEL003076	Down	-0.330592	0.0541356	0.00011566
LOC5579484	AAEL015298	Down	-0.330994	0.0803006	0.000761573
LOC5571150	AAEL008848	Down	-0.331039	0.0453079	4.00855e-05
LOC5572156	AAEL009561	Down	-0.331239	0.0345719	2.94569e-05
LOC5564541	AAEL004307	Down	-0.331834	0.0668233	0.000188134
LOC110675810	AAEL009183	Down	-0.332455	0.0734802	0.00235457
LOC5568503	AAEL006922	Down	-0.333536	0.0393357	0.000106822
LOC5576054	AAEL013952	Down	-0.33365	0.0631731	9.78814e-05
LOC5573938	AAEL002198	Down	-0.334169	0.0756013	0.000626956
LOC5574592	AAEL002411	Down	-0.335445	0.0382089	0.000462895
LOC5569141	AAEL007390	Down	-0.335897	0.0587509	8.68615e-05
LOC5575813	AAEL012069	Down	-0.33662	0.034844	4.33509e-06
LOC5578843	AAEL003731	Down	-0.337821	0.113464	0.00380602
LOC5566864	AAEL000847	Down	-0.338214	0.0657139	0.00167121
LOC5564858	AAEL004467	Down	-0.338687	0.0794814	0.000419847
LOC5568014	AAEL006460	Down	-0.339026	0.106376	0.00228459
LOC5565782	AAEL004977	Down	-0.339096	0.108339	0.0027035
LOC110679374	AAEL026843	Down	-0.339645	0.0315161	5.95191e-05
LOC5567839	AAEL001005	Down	-0.339656	0.0378995	1.81425e-05
LOC5575983	AAEL012233	Down	-0.340451	0.0616408	0.000273169
LOC5567433	AAEL006098	Down	-0.341616	0.0702969	0.000268432
LOC5565270	AAEL004691	Down	-0.341942	0.0433145	3.94142e-05
LOC5570276	AAEL008216	Down	-0.342196	0.0965429	0.0012862
LOC23687516	AAEL017096	Down	-0.342778	0.0144741	0.000134956
LOC5566725	AAEL005617	Down	-0.343216	0.0802909	0.000210574
LOC5578605	AAEL003589	Down	-0.343533	0.0481311	2.85941e-05
LOC5565253	AAEL004688	Down	-0.344488	0.0497147	0.000221471
LOC5575781	AAEL002703	Down	-0.344643	0.0659967	0.000181757
LOC5572949	AAEL010171	Down	-0.345294	0.0428835	8.34822e-06
LOC5573821	AAEL010743	Down	-0.345584	0.0948523	0.00119924
LOC5576594	AAEL002924	Down	-0.345636	0.0964849	0.00152076
LOC5574640	AAEL011274	Down	-0.346764	0.0506694	5.51918e-05
LOC5563673	AAEL000541	Down	-0.346916	0.0549241	0.000295445
LOC5572522	AAEL009837	Down	-0.347411	0.0369922	1.03163e-05
LOC5576419	AAEL012513	Down	-0.347514	0.0992336	0.00175423
LOC5572666	AAEL001845	Down	-0.347736	0.107185	0.00283748
LOC5571293	AAEL001593	Down	-0.347753	0.0608545	0.000102483
LOC5568801	AAEL001190	Down	-0.348059	0.0831784	0.000517208
LOC5566875	AAEL000840	Down	-0.34948	0.0906781	0.000735839
LOC5571047	AAEL008768	Down	-0.349564	0.045121	0.000103152
LOC5566986	AAEL005734	Down	-0.351024	0.0814476	0.000297027
LOC5570423	AAEL008330	Down	-0.351653	0.0540102	8.20626e-05
LOC5575395	AAEL011803	Down	-0.351833	0.048238	3.83856e-05
LOC5574348	AAEL002350	Down	-0.35222	0.0652851	0.000262443
LOC5573956	AAEL002207	Down	-0.353319	0.111627	0.00330068
LOC5564594	AAEL023107	Down	-0.353662	0.0987067	0.00113924
LOC5572093	AAEL009507	Down	-0.353809	0.114384	0.00308204
LOC5570055	AAEL000159	Down	-0.353941	0.0730687	0.000440809
LOC5571607	AAEL009198	Down	-0.354043	0.104161	0.00203108
LOC23687553	AAEL017133	Down	-0.354278	0.0895792	0.000593674
LOC5570877	AAEL008656	Down	-0.356387	0.0858811	0.00042067
LOC5569670	AAEL007824	Down	-0.356829	0.0146223	0.000109872
LOC5568981	AAEL007271	Down	-0.358121	0.100288	0.0010584
LOC5570312	AAEL008249	Down	-0.358146	0.0615597	2.54572e-05
LOC5579926	AAEL006795	Down	-0.358626	0.0647743	0.000229964
LOC110678856	AAEL027968	Down	-0.358695	0.0964248	0.00110403
LOC5566416	AAEL025718	Down	-0.358749	0.103455	0.00121693
LOC5573292	AAEL010371	Down	-0.358912	0.0873423	0.000711777
LOC5565060	AAEL025769	Down	-0.359098	0.045646	5.06494e-05
LOC5579214	AAEL014055	Down	-0.359361	0.105709	0.00270672
LOC5576104	AAEL002777	Down	-0.359437	0.0849882	0.000662315
LOC5569267	AAEL007509	Down	-0.359624	0.0940005	0.00106034
LOC5573712	AAEL010697	Down	-0.360563	0.0925097	0.00109213
LOC5574902	AAEL011500	Down	-0.360682	0.053935	0.000212927
LOC5565670	AAEL014931	Down	-0.361865	0.0957979	0.001068
LOC5569590	AAEL001247	Down	-0.363136	0.0432615	0.000143209
LOC5571735	AAEL009257	Down	-0.363439	0.0243177	3.67279e-05
LOC5579021	AAEL013960	Down	-0.363645	0.0483629	0.000118033
LOC5564259	AAEL022285	Down	-0.363779	0.0480799	0.000119372
LOC5567118	AAEL015304	Down	-0.367714	0.03733	6.95569e-06
LOC5565896	AAEL000687	Down	-0.367743	0.0629863	5.07556e-05
LOC5569798	AAEL001314	Down	-0.369722	0.0683182	0.000179666
LOC5571433	AAEL009055	Down	-0.370346	0.0940556	0.000939336
LOC5566936	AAEL005699	Down	-0.370438	0.0695503	0.000107404
LOC5565030	AAEL026380	Down	-0.370663	0.115804	0.00206026
LOC5564231	AAEL004176	Down	-0.37072	0.113934	0.00177469
LOC5570175	AAEL014154	Down	-0.371821	0.0958941	0.00104897
LOC5563882	AAEL014204	Down	-0.372304	0.0554411	5.67839e-05
LOC5566223	AAEL029010	Down	-0.372345	0.0987252	0.000968639
LOC5578382	AAEL013661	Down	-0.372753	0.0328121	2.15857e-05
LOC5569016	AAEL007286	Down	-0.372788	0.0575278	0.000132924
LOC5567722	AAEL021386	Down	-0.373564	0.0748197	0.000476002
LOC5565608	AAEL004879	Down	-0.373635	0.0789145	0.000595113
LOC5565323	AAEL004709	Down	-0.374986	0.0808354	0.0025255
LOC5570309	AAEL008255	Down	-0.375151	0.105301	0.00113909
LOC5570324	AAEL001385	Down	-0.375292	0.0785349	0.000235173
LOC5579855	AAEL018354	Down	-0.375504	0.111046	0.00138658
LOC5576934	AAEL012875	Down	-0.375594	0.0793372	0.000281071
LOC5566736	AAEL019920	Down	-0.375828	0.0679546	0.000163614
LOC5579108	AAEL003844	Down	-0.377343	0.0348468	0.000277435
LOC5574138	AAEL010945	Down	-0.378171	0.106438	0.00164713
LOC5577893	AAEL013407	Down	-0.378215	0.0309031	1.33653e-05
LOC5576440	AAEL005536	Down	-0.378309	0.0233798	1.70071e-05
LOC5566009	AAEL005106	Down	-0.378825	0.0753167	7.49122e-05
LOC5571453	AAEL009074	Down	-0.379054	0.0370351	1.82573e-06
LOC5579199	AAEL014039	Down	-0.379272	0.0273306	1.5754e-05
LOC5569859	AAEL007947	Down	-0.380558	0.0700159	0.00153752
LOC110681196	AAEL017135	Down	-0.380714	0.0989558	0.000786447
LOC5575848	AAEL012113	Down	-0.38102	0.0429775	2.14837e-05
LOC5573117	AAEL001960	Down	-0.382231	0.0705388	0.000163867
LOC5565450	AAEL000651	Down	-0.38244	0.0453065	0.000745464
LOC5568284	AAEL006711	Down	-0.383165	0.0629053	0.000199918
LOC5577355	AAEL000458	Down	-0.383558	0.04092	6.31126e-05
LOC5564047	AAEL004071	Down	-0.383853	0.0310417	0.000209801
LOC5564517	AAEL004291	Down	-0.383914	0.0996193	0.000976971
LOC5564874	AAEL004460	Down	-0.384029	0.0360443	0.000322188
LOC5564516	AAEL004284	Down	-0.384112	0.0327876	3.04647e-05
LOC5574636	AAEL011273	Down	-0.385109	0.103952	0.00165024
LOC5563701	AAEL019406	Down	-0.385218	0.111492	0.00184575
LOC5568114	AAEL006551	Down	-0.385808	0.0986869	0.000892197
LOC5577104	AAEL013004	Down	-0.386312	0.0723066	0.00169947
LOC5577519	AAEL021813	Down	-0.388473	0.0795393	0.000323199
LOC5565032	AAEL004553	Down	-0.388685	0.0883605	0.000489803
LOC5573994	AAEL010843	Down	-0.389552	0.0325657	1.19178e-05
LOC5575085	AAEL011641	Down	-0.390754	0.0337916	2.20961e-06
LOC5570147	AAEL008128	Down	-0.391299	0.0577625	0.000110501
LOC5571414	AAEL009041	Down	-0.393677	0.0728452	0.000403867
LOC5573948	AAEL002183	Down	-0.393762	0.0435953	0.000729289
LOC5569988	AAEL008064	Down	-0.393932	0.0622824	4.10354e-05
LOC5564053	AAEL004060	Down	-0.395336	0.0342297	0.000212429
LOC5578303	AAEL013613	Down	-0.396063	0.0758813	0.00190919
LOC5579045	AAEL013980	Down	-0.396247	0.0454125	3.06712e-05
LOC5575135	AAEL000330	Down	-0.396758	0.0907603	0.00046528
LOC5579104	AAEL003858	Down	-0.397157	0.113256	0.00180023
LOC5574590	AAEL002416	Down	-0.397861	0.0967964	0.000744811
LOC5577984	AAEL013458	Down	-0.397953	0.0464139	9.33311e-06
LOC5575278	AAEL011741	Down	-0.398901	0.0259745	1.37989e-05
LOC5577380	AAEL000415	Down	-0.399013	0.0874068	0.000803571
LOC5568211	AAEL006642	Down	-0.399899	0.033803	1.78188e-05
LOC5579150	AAEL014024	Down	-0.400629	0.0859449	0.00017375
LOC5573523	AAEL024184	Down	-0.40117	0.0845674	0.00208569
LOC5577568	AAEL013279	Down	-0.401246	0.0365455	4.02242e-05
LOC5567129	AAEL005884	Down	-0.402037	0.0966673	0.000944135
LOC5572538	AAEL009862	Down	-0.402277	0.0653602	0.000179154
LOC5572308	AAEL009700	Down	-0.402712	0.0506764	6.45472e-06
LOC5566370	AAEL005354	Down	-0.402795	0.0665919	0.000165655
LOC5572285	AAEL001779	Down	-0.403779	0.046002	0.000563746
LOC5567193	AAEL000861	Down	-0.40406	0.0544542	0.00083662
LOC5569118	AAEL007375	Down	-0.404377	0.0831027	0.000264076
LOC5565550	AAEL004854	Down	-0.404804	0.0968591	0.000584447
LOC5570136	AAEL008105	Down	-0.405348	0.0595775	0.000175438
LOC5568876	AAEL023521	Down	-0.405622	0.0701884	8.16961e-05
LOC5574429	AAEL011157	Down	-0.406034	0.0540916	0.00018786
LOC5577456	AAEL013199	Down	-0.406196	0.0977057	0.000763206
LOC5571685	AAEL009214	Down	-0.406384	0.0257047	5.1037e-06
LOC5578117	AAEL003417	Down	-0.406765	0.0815316	0.0003532
LOC5564942	AAEL004507	Down	-0.407061	0.107395	0.00089919
LOC5579183	AAEL003901	Down	-0.407596	0.10378	0.000608894
LOC5568246	AAEL006685	Down	-0.407662	0.0468449	9.56021e-06
LOC110676812	AAEL025344	Down	-0.408044	0.0907411	0.000471862
LOC110676886	AAEL026085	Down	-0.40815	0.132079	0.00259948
LOC5570014	AAEL000179	Down	-0.409401	0.0800422	0.000150717
LOC5579929	AAEL006805	Down	-0.409685	0.0767888	0.00166921
LOC5567220	AAEL000898	Down	-0.409819	0.0612625	0.000393835
LOC5568342	AAEL001065	Down	-0.409898	0.104425	0.000901304
LOC5578267	AAEL003492	Down	-0.410017	0.0311476	1.26654e-05
LOC5572696	AAEL009964	Down	-0.410425	0.0312915	4.72927e-06
LOC5574335	AAEL002349	Down	-0.411883	0.0990502	0.000525522
LOC5568945	AAEL007229	Down	-0.412223	0.0900967	0.002858
LOC5567367	AAEL006025	Down	-0.413452	0.111864	0.00165783
LOC5571854	AAEL009345	Down	-0.415399	0.0549875	0.00011323
LOC5570114	AAEL008079	Down	-0.416255	0.0335019	1.9352e-05
LOC5574240	AAEL011007	Down	-0.416288	0.0516278	6.77814e-06
LOC110674049	AAEL027326	Down	-0.416827	0.0621108	0.000129091
LOC5574555	AAEL011233	Down	-0.419048	0.0952639	0.00231557
LOC5570643	AAEL008454	Down	-0.419377	0.0737432	6.46316e-05
LOC5563664	AAEL000084	Down	-0.419586	0.0851451	0.000473454
LOC5573557	AAEL022931	Down	-0.419777	0.0800615	0.000288939
LOC5567100	AAEL005830	Down	-0.420946	0.0684383	0.00037553
LOC5577550	AAEL013263	Down	-0.421907	0.120833	0.00152504
LOC5579933	AAEL028635	Down	-0.421924	0.0937893	0.000728566
LOC5569858	AAEL007946	Down	-0.421955	0.0740276	0.00024069
LOC5568072	AAEL006514	Down	-0.423208	0.0918318	0.000361473
LOC5564133	AAEL004088	Down	-0.423264	0.0331779	1.59678e-05
LOC5570797	AAEL008588	Down	-0.423817	0.0433468	8.97851e-06
LOC5575238	AAEL011708	Down	-0.424651	0.050434	0.000104795
LOC5568680	AAEL007029	Down	-0.425246	0.0470445	6.9802e-06
LOC5575032	AAEL011584	Down	-0.427146	0.0956224	0.000638249
LOC5570020	AAEL000182	Down	-0.427505	0.0358757	2.33919e-05
LOC5573744	AAEL019937	Down	-0.429703	0.0277584	1.37451e-05
LOC5575264	AAEL011718	Down	-0.430287	0.0829483	0.000184945
LOC5564278	AAEL014379	Down	-0.431135	0.0422718	1.67318e-05
LOC5577316	AAEL013163	Down	-0.431142	0.039009	1.86382e-06
LOC5568843	AAEL007162	Down	-0.432019	0.0305156	1.35346e-06
LOC5573776	AAEL000271	Down	-0.432157	0.0802552	0.000204251
LOC5564931	AAEL004503	Down	-0.432507	0.0188568	2.1471e-07
LOC5564055	AAEL004052	Down	-0.433075	0.0952249	0.00022607
LOC5569166	AAEL007431	Down	-0.433884	0.063896	4.22587e-05
LOC5569520	AAEL007707	Down	-0.43658	0.0359932	7.49081e-05
LOC5568323	AAEL006731	Down	-0.437145	0.105091	0.00078838
LOC5576587	AAEL002933	Down	-0.438246	0.0662034	8.36615e-05
LOC5566110	AAEL005179	Down	-0.438297	0.0577509	7.49397e-05
LOC5563894		Down	-0.438709	0.0892734	0.000333701
LOC5571037	AAEL008767	Down	-0.439597	0.0923206	0.000255929
LOC5570080	AAEL001336	Down	-0.440642	0.0510399	2.76496e-05
LOC5572043	AAEL000234	Down	-0.441525	0.0626935	8.79345e-05
LOC5566028	AAEL005127	Down	-0.441646	0.0946332	0.000345863
LOC5565202	AAEL014760	Down	-0.44508	0.110049	0.00054163
LOC5566651	AAEL005500	Down	-0.448286	0.0809673	0.00026652
LOC5567565	AAEL006169	Down	-0.448595	0.0422326	6.52007e-05
LOC5564296	AAEL014393	Down	-0.449097	0.0485908	5.12684e-05
LOC5574943	AAEL010453	Down	-0.449382	0.0912552	0.00035669
LOC5579046	AAEL013979	Down	-0.452392	0.100348	0.000562233
LOC5566551	AAEL005471	Down	-0.453024	0.0330304	0.000235768
LOC5565869	AAEL015007	Down	-0.453126	0.0760046	8.75561e-05
LOC5569181	AAEL007441	Down	-0.453236	0.0449899	1.44308e-05
LOC5572427	AAEL001816	Down	-0.45348	0.0474308	3.47644e-05
LOC5571542	AAEL009130	Down	-0.453561	0.100067	0.000600127
LOC5564124	AAEL004086	Down	-0.454083	0.0676678	7.89277e-05
LOC5570068	AAEL001331	Down	-0.454462	0.0820011	0.000134288
LOC5576914	AAEL012865	Down	-0.454881	0.0713264	8.06675e-05
LOC5575179	AAEL000304	Down	-0.456377	0.0979852	0.000804982
LOC5572923	AAEL010146	Down	-0.457951	0.103799	0.000522635
LOC5570022	AAEL000206	Down	-0.459388	0.0383277	9.28463e-06
LOC5579951	AAEL006786	Down	-0.459398	0.0475173	0.000419174
LOC5576918	AAEL012863	Down	-0.462549	0.0802942	9.77992e-05
LOC5573265	AAEL010360	Down	-0.462827	0.0913203	0.00025779
LOC110674390	AAEL026769	Down	-0.464167	0.104579	0.000485063
LOC5565237	AAEL014762	Down	-0.464575	0.0959764	0.000397628
LOC5564754	AAEL026665	Down	-0.465179	0.049857	1.10649e-05
LOC5570571	AAEL008379	Down	-0.465557	0.0828028	0.000327372
LOC5579822	AAEL005521	Down	-0.465861	0.105539	0.000623598
LOC5569143	AAEL007403	Down	-0.465977	0.0870354	0.000281875
LOC5576612	AAEL012636	Down	-0.466475	0.103304	0.00101452
LOC5567260	AAEL005928	Down	-0.46666	0.0811125	0.000294352
LOC5573813	AAEL010731	Down	-0.466717	0.0734996	0.000194054
LOC5564751	AAEL014617	Down	-0.466882	0.129427	0.00141735
LOC5563904	AAEL003993	Down	-0.468463	0.0580713	3.21775e-05
LOC5577423	AAEL003160	Down	-0.46947	0.0209085	4.64708e-05
LOC5567341	AAEL006011	Down	-0.470413	0.0196289	0.000171581
LOC23687739	AAEL017319	Down	-0.471186	0.0797456	0.0013718
LOC5570054	AAEL000186	Down	-0.471242	0.0941562	0.000309537
LOC5573312	AAEL010416	Down	-0.473	0.0446237	1.74976e-06
LOC110681483	AAEL026895	Down	-0.473716	0.10371	0.000320563
LOC5565961	AAEL005048	Down	-0.473802	0.0568867	5.11573e-05
LOC5565891	AAEL000706	Down	-0.473969	0.0636607	1.53117e-05
LOC5576124	AAEL002811	Down	-0.474201	0.0417594	4.15952e-06
LOC5573249	AAEL010340	Down	-0.475054	0.0634895	5.6661e-05
LOC5569968	AAEL020092	Down	-0.477579	0.0323611	3.0519e-06
LOC5575301	AAEL023523	Down	-0.477856	0.07172	9.28097e-05
LOC5567068	AAEL005798	Down	-0.478139	0.0719419	0.00108823
LOC5571059	AAEL008793	Down	-0.478594	0.0853282	0.00182356
LOC5577272	AAEL013121	Down	-0.479773	0.0979846	0.000174353
LOC5569864	AAEL007944	Down	-0.480142	0.0648554	0.000118396
LOC110676001	AAEL020729	Down	-0.480758	0.0427568	1.47856e-05
LOC5574197	AAEL002296	Down	-0.481584	0.0870146	0.000231892
LOC5578266	AAEL003505	Down	-0.484021	0.0425031	2.79289e-05
LOC5579041	AAEL013989	Down	-0.485258	0.046304	5.11039e-05
LOC5571308	AAEL008962	Down	-0.486677	0.105483	0.000462912
LOC5564072	AAEL004067	Down	-0.486872	0.0477591	4.9335e-06
LOC5570619	AAEL008425	Down	-0.49004	0.0682194	1.10142e-05
LOC110678423	AAEL020371	Down	-0.491002	0.0943167	0.000430753
LOC110679616	AAEL027646	Down	-0.491533	0.092666	0.000163255
LOC5576007	AAEL021113	Down	-0.492649	0.0732646	0.000784371
LOC5580019	AAEL009645	Down	-0.492688	0.0387531	5.66237e-07
LOC5577687	AAEL013320	Down	-0.492881	0.0692966	0.000176136
LOC5572988	AAEL001938	Down	-0.492908	0.0932399	0.000146278
LOC5564530	AAEL013092	Down	-0.492995	0.100738	9.12056e-05
LOC5566724	AAEL005605	Down	-0.493063	0.0588773	4.70431e-05
LOC5571506	AAEL019988	Down	-0.493228	0.0711346	0.000995625
LOC5569183	AAEL007439	Down	-0.49557	0.0386637	1.00684e-05
LOC5574239	AAEL011009	Down	-0.496354	0.0919138	0.000144563
LOC5577017	AAEL012941	Down	-0.497949	0.0898199	8.44253e-05
LOC5571011	AAEL008736	Down	-0.498431	0.0762443	0.000159344
LOC5567858	AAEL006321	Down	-0.498617	0.0933177	0.000231884
LOC5567037	AAEL005790	Down	-0.49975	0.0689124	0.000112211
LOC5580166	AAEL002542	Down	-0.501151	0.0671073	0.000252351
LOC5573868	AAEL010794	Down	-0.501257	0.0957617	7.70622e-05
LOC5577095	AAEL012994	Down	-0.501616	0.0714786	5.57622e-05
LOC5579374	AAEL023497	Down	-0.503069	0.1025	0.000432652
LOC5571093	AAEL008801	Down	-0.50526	0.0334715	1.86261e-06
LOC5564041	AAEL004042	Down	-0.505829	0.0463222	0.000369629
LOC5569553	AAEL007758	Down	-0.506028	0.0817247	0.000160344
LOC5568486	AAEL006908	Down	-0.506133	0.0980007	7.78722e-05
LOC5574092	AAEL002267	Down	-0.507377	0.0498874	1.34354e-05
LOC5576849	AAEL012832	Down	-0.510302	0.0874766	0.000308983
LOC5575321	AAEL002597	Down	-0.51185	0.053125	1.17482e-05
LOC5570794	AAEL008569	Down	-0.512135	0.060563	2.08392e-05
LOC5567162	AAEL005914	Down	-0.512656	0.10258	0.000282219
LOC5568255	AAEL006704	Down	-0.513955	0.0404214	7.03567e-06
LOC5573851	AAEL010777	Down	-0.515289	0.029875	5.61599e-06
LOC23687815	AAEL017395	Down	-0.516318	0.0624673	9.82266e-05
LOC5578497	AAEL013702	Down	-0.517544	0.051518	7.50847e-06
LOC5574244	-	Down	-0.520397	0.0726289	7.53529e-05
LOC5576835	AAEL012819	Down	-0.522031	0.0419557	0.000309429
LOC5574667	AAEL011302	Down	-0.526539	0.0432497	4.78824e-05
LOC5574452	AAEL011168	Down	-0.528079	0.105336	0.000183416
LOC5571267	AAEL001573	Down	-0.528805	0.113363	0.000355929
LOC5566024	AAEL023844	Down	-0.530927	0.111474	0.000383809
LOC5570554	AAEL008367	Down	-0.531346	0.103916	0.000106492
LOC5576488	AAEL002900	Down	-0.531552	0.0580138	2.41406e-05
LOC5570230	AAEL008152	Down	-0.532118	0.0432695	3.08149e-05
LOC5578434	AAEL000505	Down	-0.535957	0.103534	0.00029852
LOC5565453	AAEL000667	Down	-0.536294	0.0326308	0.000149116
LOC5566824	AAEL022609	Down	-0.536333	0.0519897	0.000497064
LOC5578621	AAEL003599	Down	-0.536485	0.0676309	0.000109098
LOC5571543	AAEL009131	Down	-0.539085	0.053711	0.000640933
LOC5572994	AAEL001937	Down	-0.539401	0.095572	0.00013395
LOC5566877	AAEL000811	Down	-0.540375	0.0940276	6.93644e-05
LOC5575323	AAEL026160	Down	-0.540862	0.098601	7.15608e-05
LOC110675318	-	Down	-0.541686	0.0719117	1.49154e-05
LOC5565836	AAEL005017	Down	-0.541909	0.0984127	0.000298995
LOC5574055	AAEL010895	Down	-0.544868	0.0986262	0.000240166
LOC5564768	AAEL004434	Down	-0.545657	0.0462476	1.01284e-05
CFI06_mgp11	-	Down	-0.545993	0.0208656	1.1414e-06
LOC23687462	AAEL017042	Down	-0.546482	0.0541807	1.84663e-06
LOC5574250	AAEL011017	Down	-0.547596	0.0822841	6.7734e-05
LOC110678991	AAEL027217	Down	-0.547632	0.082113	3.14439e-05
LOC5579815	AAEL023500	Down	-0.54892	0.0521863	4.1821e-05
LOC5571641	AAEL001667	Down	-0.54971	0.129804	0.000670121
LOC5570784	AAEL022646	Down	-0.551384	0.0714023	7.00615e-05
LOC5571752	AAEL009274	Down	-0.551576	0.0625783	0.00012079
LOC5571276	AAEL001561	Down	-0.551794	0.0860154	0.000117505
LOC5564061	AAEL004043	Down	-0.552132	0.0882081	8.09602e-05
LOC5571045	AAEL008770	Down	-0.553342	0.0576275	2.60127e-05
LOC5569539	AAEL007713	Down	-0.554938	0.0815088	0.000112415
LOC5579505	AAEL015136	Down	-0.556306	0.0446691	0.000350599
LOC5571289	AAEL019546	Down	-0.563295	0.0419154	1.08951e-05
LOC5572049	AAEL000245	Down	-0.564027	0.0574532	9.76097e-06
LOC5577070	AAEL029008	Down	-0.566164	0.0740548	6.60732e-06
LOC5575833	AAEL026799	Down	-0.566472	0.107756	7.19572e-05
LOC23687505	AAEL017085	Down	-0.566502	0.0767974	3.92812e-05
LOC5575108	AAEL011665	Down	-0.56729	0.0655927	4.39432e-05
LOC5574634	AAEL020739	Down	-0.56747	0.0445301	4.30292e-05
LOC5574180	AAEL002304	Down	-0.568086	0.0637039	4.25677e-05
LOC5571275	AAEL001577	Down	-0.568274	0.0291332	4.01158e-06
LOC5566470	AAEL005408	Down	-0.568579	0.0912242	0.000323799
LOC5564477	AAEL014484	Down	-0.573489	0.0450368	4.36805e-05
LOC5579885	AAEL001030	Down	-0.57564	0.0928784	2.2914e-05
LOC5564381	AAEL014412	Down	-0.576104	0.0816559	6.59501e-05
LOC5565520	AAEL014871	Down	-0.576808	0.104657	0.000157372
LOC5571664	AAEL024228	Down	-0.577599	0.0803312	1.70164e-05
LOC5570932	AAEL008671	Down	-0.57773	0.0600139	2.18116e-05
LOC5578506	AAEL023729	Down	-0.58004	0.159093	0.00109766
LOC5567684	AAEL006251	Down	-0.58283	0.0611934	2.09862e-06
LOC5571141	AAEL019603	Down	-0.58552	0.0482642	0.000370689
LOC5568253	AAEL006699	Down	-0.586757	0.0279953	9.00491e-06
LOC110677685	AAEL023769	Down	-0.586771	0.063528	8.03112e-05
LOC5574677	AAEL011319	Down	-0.587344	0.0684401	0.000105755
LOC110677933	AAEL027357	Down	-0.587907	0.0568806	2.90511e-05
LOC110678573	AAEL025686	Down	-0.588509	0.140391	0.000407263
LOC5578162		Down	-0.589365	0.107771	0.000230487
LOC5578499	AAEL013709	Down	-0.589763	0.0680539	5.7074e-05
LOC5574363	AAEL011081	Down	-0.589936	0.102836	0.000122247
LOC5578823	AAEL025277	Down	-0.591115	0.107526	6.34332e-05
LOC110676370	AAEL021600	Down	-0.591873	0.0602928	3.56143e-05
LOC5579871	AAEL005985	Down	-0.592102	0.0558266	1.97225e-05
LOC5577284	AAEL013138	Down	-0.59309	0.0867635	0.000144124
LOC5563971	AAEL004023	Down	-0.59322	0.0585673	1.11827e-05
LOC5565225	AAEL004657	Down	-0.595773	0.100165	6.77079e-05
LOC5563577	AAEL000044	Down	-0.596023	0.0757537	1.82057e-05
LOC5566800	AAEL005651	Down	-0.600029	0.0530177	7.49795e-06
LOC5564821	AAEL000626	Down	-0.600822	0.046659	0.000304837
LOC5570924	AAEL026751	Down	-0.601478	0.0577507	7.81909e-06
LOC5566233	AAEL005258	Down	-0.602201	0.0802241	7.88776e-05
CFI06_mgp02	-	Down	-0.602312	0.0242928	5.52021e-06
LOC5576468	AAEL002903	Down	-0.603237	0.0685716	2.77993e-05
LOC5579101	AAEL003842	Down	-0.606258	0.0812866	0.00011304
LOC5571869	-	Down	-0.606449	0.0835619	0.000188499
LOC23687710	AAEL017290	Down	-0.606497	0.0467696	0.000273383
LOC5569123	AAEL007387	Down	-0.60867	0.066711	5.1694e-06
LOC5573328	AAEL010411	Down	-0.60915	0.0500529	1.30885e-05
CFI06_mgp12	-	Down	-0.610042	0.0205473	4.15132e-07
LOC5569333	AAEL007555	Down	-0.610426	0.111849	9.94822e-05
LOC5566079	AAEL015064	Down	-0.610927	0.0391735	0.00033823
LOC110677676		Down	-0.611385	0.0610852	3.26857e-05
LOC5568636	AAEL006990	Down	-0.611812	0.0555738	9.16687e-05
LOC5568550	-	Down	-0.612282	0.166898	0.0010904
LOC110675403	AAEL026415	Down	-0.612311	0.0721657	7.37608e-05
LOC5574731	AAEL011371	Down	-0.613511	0.0439047	0.000412608
LOC5564242	AAEL004188	Down	-0.613629	0.0578338	9.12096e-05
LOC5568498	AAEL006912	Down	-0.616507	0.0935685	7.0082e-05
LOC5577180	AAEL013052	Down	-0.617938	0.0677122	6.89448e-06
LOC5579903	AAEL001022	Down	-0.621333	0.0413845	2.26573e-05
LOC5565220	AAEL004676	Down	-0.622834	0.0443426	2.10508e-05
LOC5567466	AAEL000958	Down	-0.623281	0.0587237	1.86178e-05
LOC5572980	AAEL024063	Down	-0.625388	0.0684138	0.000467501
LOC5575858	AAEL019972	Down	-0.628359	0.0975082	0.000267518
LOC5569684	AAEL007830	Down	-0.628714	0.117851	0.000270833
LOC5565405	AAEL014843	Down	-0.629564	0.0335968	0.000121077
LOC5567160	AAEL005910	Down	-0.632657	0.0782617	0.00015535
LOC5571755	AAEL009278	Down	-0.637594	0.0444183	0.0003029
LOC5580112	AAEL010938	Down	-0.639168	0.0973299	0.000115477
LOC110678443	AAEL027700	Down	-0.641129	0.0401273	9.47734e-06
LOC23687599	AAEL017179	Down	-0.64164	0.0830434	4.08868e-05
LOC5565904	AAEL018117	Down	-0.64212	0.0950748	5.62124e-05
LOC5577552	AAEL013262	Down	-0.642814	0.0977748	5.34056e-05
LOC5575645	AAEL011979	Down	-0.643414	0.0514797	1.30771e-05
LOC110678695	AAEL028145	Down	-0.64504	0.0356475	1.06028e-05
LOC5566701	AAEL005593	Down	-0.646584	0.101778	5.60855e-05
LOC5573295	AAEL010382	Down	-0.649008	0.0353257	5.48359e-06
LOC5579978	AAEL007731	Down	-0.653973	0.104582	5.58149e-05
LOC5572209	AAEL009601	Down	-0.655647	0.032183	5.88534e-07
LOC5580058	AAEL002155	Down	-0.65667	0.0772698	1.1895e-05
LOC5567242	AAEL000883	Down	-0.657584	0.0964606	4.44144e-05
LOC5571828	AAEL001690	Down	-0.657897	0.0755512	8.36212e-05
LOC5569598	AAEL021578	Down	-0.658989	0.0560124	2.62368e-05
LOC5577023	AAEL012939	Down	-0.662167	0.0442307	0.000176246
LOC5575250		Down	-0.663015	0.157912	0.000692346
LOC110679583	AAEL023591	Down	-0.664106	0.0575291	0.000442068
LOC5578156	AAEL013536	Down	-0.666982	0.0541676	7.4118e-06
LOC5574657	AAEL021072	Down	-0.673112	0.0494385	1.17132e-05
CFI06_mgp07	-	Down	-0.675163	0.0344945	2.68818e-06
LOC5568743	AAEL007092	Down	-0.679117	0.0774732	6.29151e-05
LOC5568333	AAEL021491	Down	-0.684459	0.103306	5.14801e-05
LOC5573442	AAEL010478	Down	-0.684515	0.0737472	2.63193e-05
LOC5569026	AAEL007322	Down	-0.684912	0.0463027	6.60987e-06
CFI06_mgp08	-	Down	-0.685657	0.021277	2.46265e-06
LOC5566301	AAEL005293	Down	-0.686443	0.0488341	4.30502e-06
LOC5575706	AAEL012014	Down	-0.689953	0.0829955	0.000700326
LOC5569911	AAEL008007	Down	-0.691996	0.102433	8.61338e-05
LOC5569518	AAEL007704	Down	-0.692467	0.0646858	4.96325e-05
LOC5567342	AAEL006006	Down	-0.693594	0.0982784	2.70343e-05
LOC5567769	AAEL000102	Down	-0.693631	0.0680038	1.82387e-05
LOC5578871	AAEL003728	Down	-0.695042	0.102573	1.79801e-05
LOC23687501	AAEL017081	Down	-0.699788	0.0519976	1.64971e-06
LOC5569816	AAEL001307	Down	-0.700658	0.0822724	1.72624e-05
LOC5574496	AAEL002399	Down	-0.700673	0.0632346	2.29355e-05
LOC5573858	AAEL010782	Down	-0.70593	0.0558369	2.84049e-05
LOC5568325	AAEL006718	Down	-0.707005	0.0762067	1.44306e-05
LOC5577227	AAEL003130	Down	-0.707347	0.0463877	0.000201584
LOC5577544	AAEL013256	Down	-0.709919	0.0923051	2.80433e-05
LOC5567311	AAEL005965	Down	-0.712839	0.0828005	4.17291e-05
LOC5578160	AAEL005113	Down	-0.717207	0.104471	1.65299e-05
LOC110680940	AAEL025213	Down	-0.720701	0.0659297	1.65847e-05
LOC5576170	AAEL012359	Down	-0.721155	0.0321022	5.84504e-07
LOC5567743	AAEL021429	Down	-0.723409	0.10706	5.99063e-05
LOC5565839	AAEL005027	Down	-0.723547	0.0787144	6.05182e-05
LOC5571529	AAEL009124	Down	-0.724456	0.106275	5.88794e-05
LOC110675944	AAEL006953	Down	-0.729233	0.217703	0.00172496
LOC5572890	AAEL010095	Down	-0.731597	0.0485467	2.28693e-06
LOC5565442	AAEL000634	Down	-0.736927	0.1015	5.25809e-05
LOC5572255	AAEL009681	Down	-0.738235	0.0930413	3.26152e-05
LOC5570366	AAEL008274	Down	-0.744072	0.0564552	3.21983e-06
CFI06_mgp01	-	Down	-0.746525	0.0381521	9.12686e-07
LOC5566585	AAEL000759	Down	-0.758643	0.0680785	1.029e-05
LOC5572372	AAEL009760	Down	-0.760315	0.0316432	4.96306e-05
LOC110679164	AAEL022280	Down	-0.761019	0.0683969	0.000419107
LOC5570667	AAEL008486	Down	-0.765323	0.0823517	5.25325e-05
LOC5568202	AAEL006634	Down	-0.769252	0.0797636	3.37196e-06
LOC5576932	AAEL020654	Down	-0.771259	0.0891361	0.000670155
LOC5568938	AAEL007246	Down	-0.790951	0.0989594	0.000674926
LOC5578619	AAEL003590	Down	-0.79623	0.0299698	2.96295e-06
LOC5575615	AAEL019860	Down	-0.801875	0.0561578	1.01057e-06
LOC5577615	AAEL028088	Down	-0.805866	0.11151	0.000159027
CFI06_mgp09	-	Down	-0.808186	0.0271236	3.30281e-07
LOC5570654	AAEL008458	Down	-0.810928	0.0832819	8.72468e-06
LOC5566344	AAEL020936	Down	-0.818649	0.0708158	3.64803e-06
LOC5572257	AAEL009680	Down	-0.819646	0.0289106	4.74516e-09
LOC23687722	AAEL017302	Down	-0.823267	0.085287	2.01728e-05
LOC5573667	AAEL010673	Down	-0.82374	0.059625	1.23664e-05
LOC5577637	AAEL003237	Down	-0.829444	0.0734947	3.16829e-05
LOC5568166	AAEL006609	Down	-0.830802	0.0654006	2.48611e-05
LOC5568254	AAEL006702	Down	-0.832659	0.0311205	2.86314e-06
LOC5564337		Down	-0.837365	0.0365276	3.45226e-07
LOC5568346	AAEL001054	Down	-0.839004	0.0909917	0.000636891
LOC5564019	AAEL019487	Down	-0.840584	0.0614235	1.60223e-06
LOC23687740	AAEL017320	Down	-0.840848	0.0860556	7.9618e-05
LOC110677143	AAEL020793	Down	-0.844776	0.114027	0.000125777
LOC5574655	AAEL022570	Down	-0.846386	0.0305871	4.997e-06
LOC5571038	AAEL008782	Down	-0.848171	0.0849443	1.89494e-05
LOC110680755	AAEL011758	Down	-0.85991	0.0729678	1.65404e-05
LOC5569832	AAEL007942	Down	-0.860801	0.0456106	2.55686e-06
LOC5568256	AAEL006691	Down	-0.861733	0.0346776	5.24792e-06
LOC5573256	AAEL010338	Down	-0.86593	0.0576808	3.96439e-06
LOC5563618	AAEL000049	Down	-0.889784	0.0964982	2.32391e-05
LOC5571127	AAEL019751	Down	-0.901971	0.0553799	1.39115e-06
LOC5570622	AAEL008428	Down	-0.918849	0.0358731	2.6338e-06
LOC5569048	AAEL007344	Down	-0.924637	0.0513014	2.80887e-05
LOC5566457	AAEL005428	Down	-0.927693	0.040644	0.000136411
LOC5574196	AAEL002293	Down	-0.929043	0.0995496	3.12205e-05
LOC5574523	AAEL011203	Down	-0.931567	0.116656	6.7335e-05
LOC5578507	AAEL013715	Down	-0.933079	0.197764	0.000412312
LOC5579964	AAEL007595	Down	-0.939606	0.0767877	3.26722e-06
CFI06_mgp03	-	Down	-0.945744	0.0397429	9.86088e-06
LOC5573209	AAEL022977	Down	-0.947974	0.0518253	2.32431e-07
LOC5572154	AAEL029014	Down	-0.949613	0.0942581	2.35475e-05
LOC5565203	AAEL004665	Down	-0.95916	0.092851	1.32325e-05
LOC5567218	AAEL000905	Down	-0.963475	0.0557851	1.4472e-06
LOC5564549	AAEL004317	Down	-0.964558	0.0915207	2.40368e-05
LOC5568045	AAEL026555	Down	-0.971918	0.0646456	3.53421e-06
LOC5566613	AAEL000757	Down	-0.973883	0.0416436	7.5187e-07
LOC5576348	AAEL002861	Down	-0.977327	0.0851583	2.40703e-05
LOC110678855	AAEL025367	Down	-0.979366	0.0390907	2.16333e-07
LOC5579391	AAEL015493	Down	-0.983149	0.0945813	1.33046e-05
LOC5564117	AAEL019408	Down	-0.988635	0.063291	5.3725e-06
LOC5580053	AAEL002175	Down	-0.989163	0.0780946	0.000371078
LOC5573583	AAEL002130	Down	-1.00166	0.0491529	9.60922e-07
LOC5568476	AAEL006886	Down	-1.01261	0.0503609	1.02826e-05
LOC5571097	AAEL001511	Down	-1.04022	0.104528	2.65704e-05
LOC110675610	AAEL026008	Down	-1.04269	0.0283525	7.63542e-07
LOC5579100	AAEL026896	Down	-1.06479	0.0592188	1.82652e-05
LOC5570663	AAEL008489	Down	-1.06536	0.101581	7.89e-05
LOC5580073	AAEL002158	Down	-1.06586	0.0546201	3.63743e-06
LOC5574193	AAEL002309	Down	-1.08501	0.0544363	8.93593e-06
CFI06_mgp13	-	Down	-1.0879	0.0402006	6.31982e-07
LOC5568218	AAEL006653	Down	-1.1019	0.104845	1.06344e-05
LOC5570219	AAEL024456	Down	-1.11341	0.0455816	4.29388e-06
LOC5568939	AAEL007238	Down	-1.11815	0.0798942	9.68159e-07
CFI06_mgr02	-	Down	-1.1391	0.0159236	1.95277e-05
LOC5573215	AAEL019561	Down	-1.14022	0.0770814	9.02503e-06
LOC5567887	AAEL006327	Down	-1.14723	0.0968375	1.67937e-05
LOC5576330	AAEL019728	Down	-1.16706	0.0822513	2.45808e-06
LOC5568403	AAEL006820	Down	-1.17032	0.0406843	3.77581e-06
LOC5570591	AAEL008408	Down	-1.18196	0.097334	1.90552e-05
CFI06_mgr01	-	Down	-1.20909	0.0409729	0.000106418
LOC5569168	AAEL007432	Down	-1.21259	0.251493	0.000108957
LOC110675611	AAEL026833	Down	-1.22911	0.0391187	3.90069e-07
LOC5572513	AAEL009850	Down	-1.27315	0.0631578	8.62583e-06
CFI06_mgp06	-	Down	-1.27462	0.03766	2.60044e-07
LOC5564196	AAEL014348	Down	-1.32941	0.0687908	1.1333e-06
LOC5570960	AAEL008692	Down	-1.33908	0.0587374	1.51239e-05
LOC5577480	AAEL024613	Down	-1.34424	0.0920199	5.62036e-06
LOC23687934	AAEL017514	Down	-1.41165	0.0687434	0.000185542
LOC110677665	AAEL010932	Down	-1.41278	0.0981349	3.05511e-06
LOC110675609	AAEL021795	Down	-1.42825	0.0376724	5.14868e-05
LOC5564609	AAEL014531	Down	-1.45366	0.105738	3.87594e-07
LOC5570678	AAEL008473	Down	-1.46399	0.0939304	2.50896e-05
LOC5576246	AAEL002853	Down	-1.49234	0.0707919	0.000208053
CFI06_mgp05	-	Down	-1.4935	0.038257	2.4823e-08
LOC5572674	AAEL009951	Down	-1.68109	0.0665541	1.68729e-07
LOC5566558	AAEL005482	Down	-1.75282	0.159995	3.95017e-05
LOC110675128	AAEL026302	Down	-1.75745	0.030057	2.01836e-05
LOC5577135	AAEL003123	Down	-1.78132	0.0978784	1.73913e-06
LOC5574618	AAEL011254	Down	-1.84034	0.0862462	5.14429e-07
LOC5566497		Down	-1.88492	0.0380013	1.2748e-06
LOC110674148		Down	-2.17443	0.0786042	3.93358e-07
LOC110674150		Down	-2.21523	0.0856417	1.09953e-06
LOC5577707		Down	-3.23704	0.0930007	3.03273e-12

## Sheet: EC
gene	VectorBase_ID	Regulation	de_coef	de_se	de_pval
LOC5574916	AAEL011519	Up	1.04154	0.0656356	5.55319e-06
LOC5578455	AAEL000500	Up	1.03286	0.0384257	1.0605e-07
LOC5568667		Up	0.929568	0.120683	3.64541e-05
LOC5570414	AAEL021996	Up	0.922981	0.0678156	2.3488e-06
LOC5570985	AAEL010926	Up	0.908918	0.053653	3.00121e-05
LOC5564993	AAEL004522	Up	0.877738	0.0662267	4.9137e-07
LOC110676297	AAEL027453	Up	0.874722	0.0366258	2.69665e-06
LOC5570465	AAEL026904	Up	0.859446	0.00764924	1.44131e-09
LOC5570210	AAEL008163	Up	0.808852	0.0788525	1.5118e-05
LOC5568656	-	Up	0.798331	0.0323362	1.40783e-06
LOC5578604	AAEL021931	Up	0.766897	0.0627574	2.34858e-05
LOC5565437	AAEL000661	Up	0.749934	0.051549	3.22591e-06
LOC5576518	AAEL012578	Up	0.749189	0.0317108	2.95431e-06
LOC5571144	AAEL008841	Up	0.729885	0.0692312	1.82927e-05
LOC5577771	AAEL003318	Up	0.726418	0.0386589	3.49113e-06
LOC5571799	AAEL009323	Up	0.694836	0.0311474	9.42078e-07
LOC5574993	AAEL002534	Up	0.682882	0.00846835	2.82835e-05
LOC5565900	AAEL000716	Up	0.657508	0.052959	3.52328e-05
LOC5578307	AAEL013628	Up	0.653137	0.0112295	6.6749e-09
LOC5576800	AAEL012783	Up	0.647409	0.0278376	2.7033e-08
LOC5566780	AAEL015247	Up	0.639623	0.0332309	5.3587e-10
LOC5571667	AAEL001641	Up	0.63387	0.06583	3.1563e-05
LOC110680765	AAEL023816	Up	0.633112	0.0612102	1.09199e-05
LOC5573431	AAEL026825	Up	0.612326	0.0404518	3.09217e-05
LOC5568550	-	Up	0.604583	0.209805	0.00239952
LOC5578920	AAEL003748	Up	0.588841	0.0425215	1.13694e-06
LOC5567820	AAEL001000	Up	0.577515	0.0767487	0.00017673
LOC5577078	AAEL012975	Up	0.573959	0.0287807	4.52876e-05
LOC5565970	AAEL015018	Up	0.572071	0.0799419	4.16715e-05
LOC5571463	AAEL009105	Up	0.566301	0.0794645	0.000287852
LOC5567470	AAEL000947	Up	0.56606	0.0310257	6.38937e-06
LOC5574917	AAEL011522	Up	0.565317	0.0664757	2.91463e-05
LOC5572750	AAEL010037	Up	0.562284	0.0732612	8.01395e-05
LOC5566327	AAEL005313	Up	0.552858	0.0598225	8.45381e-06
LOC5578605	AAEL003589	Up	0.548207	0.105044	0.000162833
LOC5571922	AAEL009406	Up	0.544359	0.0393273	2.9929e-06
LOC23687740	AAEL017320	Up	0.542356	0.0317571	5.13862e-08
LOC5578010	AAEL003365	Up	0.536067	0.0467101	0.000370185
LOC5564226	-	Up	0.528722	0.00666849	3.03285e-05
LOC5573011	AAEL001940	Up	0.528482	0.072109	0.000138989
LOC5575741	AAEL012051	Up	0.525181	0.0650499	3.73886e-06
LOC110676831	-	Up	0.523758	0.0335943	1.12144e-05
LOC5575269	AAEL011739	Up	0.522378	0.0419434	4.15585e-05
LOC5569771	AAEL007891	Up	0.515423	0.0495142	7.22179e-06
LOC5579851	AAEL005861	Up	0.510526	0.0413266	2.76023e-06
LOC110677076	AAEL023112	Up	0.509961	0.0788215	3.39469e-05
LOC110675944	AAEL006953	Up	0.5082	0.142749	0.00101192
LOC5567084	AAEL005821	Up	0.507039	0.0831027	0.000115829
LOC5565635	AAEL028015	Up	0.499145	0.0557253	6.20829e-05
LOC5571788	AAEL027166	Up	0.498782	0.0481702	1.83332e-05
LOC5577025	AAEL012932	Up	0.493944	0.0587165	7.7617e-05
LOC5573540	AAEL010591	Up	0.49303	0.0496787	3.34471e-05
LOC5568663	AAEL007011	Up	0.492428	0.0328003	5.65464e-06
LOC5564994	AAEL004527	Up	0.490957	0.041932	0.000274962
LOC5570804	AAEL008577	Up	0.487565	0.0723989	0.000930938
LOC5578998	AAEL021175	Up	0.484745	0.057691	1.55767e-05
LOC5575147	AAEL000332	Up	0.483809	0.0766777	5.06398e-05
LOC5574353	AAEL002347	Up	0.478291	0.0494896	3.79672e-05
LOC110676293	AAEL003723	Up	0.473613	0.0850045	5.61636e-05
LOC110676001	AAEL020729	Up	0.473613	0.0877488	0.00017334
LOC5571787	AAEL023559	Up	0.472623	0.0687308	4.55088e-05
LOC5567547	AAEL006135	Up	0.47182	0.0688577	6.5745e-05
LOC5565804	AAEL005008	Up	0.47182	0.0273564	1.26003e-06
LOC5575824	AAEL012100	Up	0.47138	0.0548655	9.22795e-06
LOC5575488	AAEL011857	Up	0.47135	0.0793085	3.45878e-05
LOC5571578	AAEL019446	Up	0.467487	0.0835106	0.000168872
LOC110673978	AAEL006000	Up	0.465776	0.0384852	2.00054e-05
LOC110679185	AAEL023306	Up	0.465161	0.0761713	0.000122315
LOC5571215	AAEL007191	Up	0.459041	0.0525092	6.00995e-05
LOC5569755	AAEL007892	Up	0.452379	0.0386023	7.22385e-05
LOC5578372	AAEL003524	Up	0.448671	0.0546169	3.01185e-05
LOC5572631	AAEL001840	Up	0.447102	0.0431315	2.05411e-05
LOC5569135	AAEL007397	Up	0.445174	0.0554621	1.86305e-05
LOC5574499	AAEL002390	Up	0.445098	0.0487549	5.41055e-05
LOC5575384	AAEL011790	Up	0.445029	0.0634709	3.25623e-05
LOC5564935	AAEL004489	Up	0.43975	0.0740951	0.000323615
LOC5569850	AAEL007959	Up	0.437438	0.043277	1.7703e-05
LOC5566121	AAEL005185	Up	0.43627	0.0600741	7.42712e-05
LOC5578754	AAEL003654	Up	0.434929	0.080287	0.000223879
LOC5580072	AAEL002139	Up	0.430714	0.0733631	0.000359752
LOC5578050	AAEL013484	Up	0.429939	0.0470387	2.92072e-05
LOC5572966	AAEL010181	Up	0.428347	0.0412321	5.95632e-06
LOC5573776	AAEL000271	Up	0.427278	0.0398238	3.40325e-05
LOC5570515	AAEL001423	Up	0.426974	0.0475363	0.000634001
LOC5577019	AAEL012931	Up	0.425387	0.0484096	8.16215e-06
LOC5567061	AAEL005802	Up	0.423213	0.0517523	4.28459e-05
LOC5573855	AAEL010776	Up	0.422065	0.0216636	2.69514e-07
LOC5570686	AAEL008500	Up	0.421987	0.0286404	3.10428e-06
LOC5580128	AAEL002435	Up	0.420998	0.0540946	6.95163e-05
LOC5567028	AAEL005762	Up	0.41652	0.0447935	5.05144e-05
LOC5575423	AAEL011827	Up	0.415971	0.0686681	0.000201535
LOC5572635	AAEL001839	Up	0.415383	0.0760234	0.000215992
LOC110676091	AAEL020757	Up	0.413703	0.0477941	7.45752e-06
LOC110676307	AAEL025437	Up	0.413129	0.0611189	8.38903e-05
LOC5573200	AAEL001998	Up	0.412667	0.0159708	6.70972e-05
LOC5564567	AAEL014516	Up	0.412456	0.0175472	2.49155e-07
LOC5565265	AAEL004697	Up	0.410284	0.0500669	0.000157076
LOC5576923	AAEL012864	Up	0.408181	0.0761129	9.52551e-05
LOC5571317	AAEL008942	Up	0.404441	0.0511972	3.28113e-05
LOC5569945	AAEL008041	Up	0.403251	0.0426798	0.000110643
LOC5577403	AAEL003165	Up	0.402087	0.0838928	0.000415312
LOC5566484	AAEL005401	Up	0.399063	0.0101922	1.3895e-07
LOC5571838	AAEL001693	Up	0.397394	0.0519542	0.000100882
LOC5568799	AAEL001159	Up	0.396278	0.0372142	0.000327058
LOC5572000	AAEL009486	Up	0.395649	0.0594728	0.000210124
LOC5567922	AAEL006376	Up	0.394986	0.080489	0.000451537
LOC5574881	AAEL011496	Up	0.394239	0.0779018	0.000284881
LOC5577721	AAEL013356	Up	0.392665	0.0474688	0.000655379
LOC110677853	AAEL023382	Up	0.389056	0.0322926	5.44156e-06
LOC5564995	AAEL004526	Up	0.388263	0.113382	0.00178689
LOC5571452	AAEL009084	Up	0.387258	0.0610369	0.000219748
LOC5567927	AAEL006372	Up	0.386959	0.0192961	0.000178151
LOC5564459	AAEL004247	Up	0.386558	0.0299245	1.46803e-05
LOC5572942	AAEL010154	Up	0.386415	0.0735699	0.00175166
LOC5572611	AAEL009922	Up	0.385451	0.0765263	0.000221789
LOC5566341	AAEL005329	Up	0.385428	0.0363378	0.000353963
LOC5572460	AAEL001812	Up	0.384984	0.0490197	0.00012004
LOC5579955	AAEL007592	Up	0.384672	0.0525214	0.000138181
LOC5567616	AAEL006196	Up	0.384293	0.0378325	2.22971e-05
LOC5576327	AAEL000406	Up	0.382944	0.0239775	8.99443e-06
LOC5578825	AAEL026922	Up	0.382478	0.0248895	1.29965e-06
LOC5569091	AAEL007355	Up	0.381395	0.0402835	4.44494e-05
LOC5579337	AAEL019957	Up	0.381116	0.0735755	0.00196651
LOC5572624	AAEL009944	Up	0.380588	0.0659672	0.000156607
LOC5569240	AAEL024535	Up	0.379251	0.0356715	5.86364e-05
LOC5568916	AAEL019536	Up	0.378727	0.0208456	2.25433e-06
LOC5569704	AAEL007865	Up	0.377854	0.0792444	0.000324483
LOC5571227	AAEL008928	Up	0.377313	0.037289	0.000358581
LOC5571940	AAEL009423	Up	0.377285	0.0859344	0.00267121
LOC5574368	AAEL011088	Up	0.376731	0.0375113	3.43277e-05
LOC5563910	AAEL003986	Up	0.375848	0.0226702	3.07369e-08
LOC5576159	AAEL012351	Up	0.375563	0.0641063	0.000172524
LOC5570810	AAEL008574	Up	0.37504	0.0223032	8.93744e-06
LOC110676548	AAEL022995	Up	0.374574	0.0226008	1.34513e-06
LOC5571137	AAEL020307	Up	0.370929	0.0442558	4.91018e-05
LOC5572507	AAEL009843	Up	0.370338	0.0307088	8.114e-06
LOC5577518	AAEL003190	Up	0.370023	0.0690958	0.000251738
LOC5574516	AAEL011184	Up	0.369535	0.073688	0.000210863
LOC5569090	AAEL007351	Up	0.368477	0.0670269	0.00056869
LOC5575628	AAEL011958	Up	0.36791	0.0604993	0.00124479
LOC5564391	AAEL004228	Up	0.367888	0.0549765	0.000148425
LOC5570812	AAEL008584	Up	0.367108	0.0598045	0.00128001
LOC5569932	AAEL008028	Up	0.364523	0.0420834	5.49671e-05
LOC5570807	AAEL026522	Up	0.364242	0.0727741	0.00191119
LOC5573490	AAEL010540	Up	0.364117	0.138764	0.0079984
LOC5563647	AAEL000046	Up	0.363894	0.0557797	0.000185424
LOC5566845	AAEL022540	Up	0.362852	0.0846853	0.000836385
LOC110679043	AAEL007871	Up	0.362673	0.0703958	0.000272708
LOC5579660	AAEL003959	Up	0.362144	0.0416849	0.000105761
LOC5578392	AAEL013684	Up	0.361879	0.073478	0.000389535
LOC5569925	AAEL027654	Up	0.361173	0.0126091	8.94094e-05
LOC5565453	AAEL000667	Up	0.358105	0.0731721	0.00038839
LOC5573549	AAEL025979	Up	0.358096	0.0470071	0.000123437
LOC5578054	AAEL013491	Up	0.356199	0.0454814	0.000856067
LOC5568232	AAEL006672	Up	0.355279	0.0742097	0.000206519
LOC110677960	AAEL023193	Up	0.354589	0.0556236	0.000117456
LOC5570958	AAEL008687	Up	0.353135	0.0435327	2.74892e-05
LOC5575687	AAEL013713	Up	0.352836	0.0188685	8.14213e-07
LOC5570108	AAEL020238	Up	0.352243	0.00680459	3.45061e-05
LOC5565801	AAEL005001	Up	0.350554	0.020194	2.55001e-05
LOC5572149	AAEL009567	Up	0.350017	0.0792668	0.000562244
LOC5579214	AAEL014055	Up	0.349615	0.0387466	7.01831e-05
LOC23687432	AAEL017012	Up	0.34954	0.0712507	0.000137027
LOC5569671	AAEL007825	Up	0.349411	0.0728913	0.000399819
LOC5565540	AAEL004860	Up	0.347795	0.0333454	0.000283324
LOC5571386	AAEL009017	Up	0.347651	0.0333003	1.90196e-05
LOC5576023	AAEL012260	Up	0.347568	0.0741206	0.000262773
LOC5577193	AAEL013075	Up	0.3465	0.0313256	4.69569e-06
LOC5565657	AAEL004914	Up	0.346086	0.0259208	3.1138e-05
LOC5569994	AAEL008071	Up	0.345481	0.0781334	0.000840173
LOC5574394	AAEL011114	Up	0.343144	0.0666164	0.000239983
LOC110679481	AAEL022123	Up	0.342937	0.0567717	0.000244634
LOC5576176	AAEL012378	Up	0.342316	0.0803575	0.00110292
LOC5565741	AAEL004967	Up	0.341596	0.0635905	0.000155252
LOC5564724	AAEL004404	Up	0.339647	0.0305037	7.61991e-06
LOC5567426	AAEL006067	Up	0.339165	0.0813816	0.000768894
LOC5569531	AAEL007715	Up	0.339127	0.0061772	3.78095e-05
LOC5569708	AAEL007863	Up	0.338506	0.0820017	0.000422166
LOC110676700	AAEL020569	Up	0.338145	0.125382	0.00639872
LOC5578857	AAEL027402	Up	0.337932	0.0143131	0.000128265
LOC5568617	AAEL006966	Up	0.335491	0.0417981	5.63944e-05
LOC5572031	AAEL000223	Up	0.333668	0.0492046	0.00104904
LOC5569203	AAEL007469	Up	0.333327	0.0673118	0.000196218
LOC5574799	AAEL002487	Up	0.332438	0.0332296	3.32234e-05
LOC5568178	AAEL019914	Up	0.331759	0.0378446	1.2745e-05
LOC5574752	AAEL011390	Up	0.331553	0.047559	0.000302048
LOC5576400	AAEL018056	Up	0.33149	0.0731449	0.000663211
LOC5566548	AAEL005466	Up	0.33052	0.0674391	0.000497985
LOC5568577	AAEL022849	Up	0.330487	0.0313032	9.3317e-06
LOC5573048	AAEL010223	Up	0.330457	0.0637426	0.000566708
LOC5571189	AAEL008878	Up	0.330254	0.0375974	0.000382433
LOC5573478	AAEL010520	Up	0.328742	0.0613035	0.00017724
LOC5567898	AAEL006342	Up	0.327705	0.0232076	3.85474e-05
LOC5570852	AAEL008632	Up	0.326774	0.0484833	5.90668e-05
LOC5572340	AAEL009734	Up	0.32631	0.0550867	0.000578749
LOC5566555	AAEL019521	Up	0.325789	0.0598623	6.71601e-05
LOC5577322	AAEL000444	Up	0.324791	0.0617823	0.000147644
LOC5567213	AAEL026995	Up	0.324716	0.0809644	0.00102524
LOC5566514	AAEL005460	Up	0.324396	0.0409797	2.97841e-05
LOC5571894	AAEL009382	Up	0.323938	0.073787	0.00048824
LOC5572968	AAEL010168	Up	0.323248	0.00733426	1.11869e-08
LOC5564891	AAEL004482	Up	0.322527	0.0815233	0.0011804
LOC5570423	AAEL008330	Up	0.322488	0.0273566	9.88596e-06
LOC5567700	AAEL006274	Up	0.321663	0.0525992	0.00031254
LOC5569739	AAEL007881	Up	0.318459	0.0378563	4.84381e-05
LOC110674569	AAEL020789	Up	0.318023	0.0340533	0.000328113
LOC5579819	AAEL005520	Up	0.31784	0.0592	0.000298213
LOC5565281	AAEL013640	Up	0.317714	0.0722026	0.000396455
LOC5571803	AAEL009330	Up	0.317523	0.010168	0.000114262
LOC5570432	AAEL008329	Up	0.316256	0.00659124	7.88591e-05
LOC5573536	AAEL010576	Up	0.316039	0.0344983	2.20382e-05
LOC5575113	AAEL011651	Up	0.315957	0.0680021	0.00225019
LOC5579458	AAEL015404	Up	0.315724	0.131548	0.015197
LOC5572744	AAEL021667	Up	0.315404	0.0328709	6.22481e-05
LOC5576203	AAEL012398	Up	0.314123	0.0268807	1.88717e-06
LOC5572956	AAEL010177	Up	0.312568	0.0771166	0.000790993
LOC5577287	AAEL019986	Up	0.312478	0.0688989	0.000367176
LOC5573287	AAEL010366	Up	0.310457	0.0309547	6.57752e-05
LOC5567851	AAEL006322	Up	0.310208	0.036083	0.000504178
LOC5576226	AAEL002836	Up	0.309246	0.0782516	0.000689916
LOC5570211	AAEL019828	Up	0.309057	0.0212251	6.42222e-05
LOC5564333	AAEL004209	Up	0.308378	0.0290002	1.75937e-07
LOC5564732	AAEL004407	Up	0.307291	0.0441944	1.96877e-05
LOC5563908	AAEL019886	Up	0.307111	0.0802071	0.00126841
LOC5577763	AAEL003317	Up	0.306012	0.0401092	0.000109227
LOC5577309	AAEL013158	Up	0.305437	0.014949	0.000164062
LOC5577246	AAEL006071	Up	0.30416	0.0557305	0.000229393
LOC5573533	AAEL010590	Up	0.303182	0.0562336	0.000237043
LOC5575753	AAEL002723	Up	0.302899	0.0260541	4.67151e-05
LOC5578270	AAEL008639	Up	0.302249	0.0421222	9.44668e-05
LOC5567527	AAEL006134	Up	0.300909	0.0724834	0.00100286
LOC5569822	AAEL001312	Up	0.300364	0.0580517	0.000249879
LOC5563691	AAEL000561	Up	0.299804	0.0788501	0.00116521
LOC5564750	AAEL014614	Up	0.299461	0.0395773	9.54142e-05
LOC5568237	AAEL006678	Up	0.298977	0.0780818	0.0013672
LOC5571381	AAEL025929	Up	0.298872	0.047436	8.35665e-05
LOC5572532	AAEL009863	Up	0.298239	0.0261174	2.66342e-06
LOC5579888	AAEL001046	Up	0.298187	0.0517781	7.61654e-05
LOC110676860	AAEL020769	Up	0.297655	0.0704384	0.000811653
LOC5578269	AAEL003497	Up	0.297184	0.0382437	8.22326e-05
LOC5570950	AAEL008676	Up	0.294634	0.0767004	0.00112538
LOC5578218	AAEL003454	Up	0.294628	0.0678938	0.00290819
LOC5564835	AAEL000622	Up	0.294037	0.0466965	0.000108806
LOC5573377	AAEL010465	Up	0.293692	0.0521218	7.20711e-05
LOC5578343	AAEL003514	Up	0.293589	0.027309	3.84821e-05
LOC110676901	AAEL024164	Up	0.293106	0.0598575	0.000242057
LOC5574522	AAEL011198	Up	0.29251	0.053366	0.000292067
LOC5575957	AAEL012195	Up	0.292402	0.0568918	0.00025655
LOC5564319	AAEL000574	Up	0.290822	0.0516382	0.000139083
LOC110677813	AAEL024098	Up	0.290631	0.0738873	0.000913956
LOC5567865	AAEL029115	Up	0.290187	0.0483211	0.00112767
LOC5563791	AAEL003944	Up	0.288925	0.0351589	0.000554257
LOC5564010	AAEL014273	Up	0.288622	0.0435989	5.22389e-05
LOC23687946	AAEL017526	Up	0.288065	0.0595712	0.00052853
LOC5569470	AAEL007651	Up	0.287926	0.0729524	0.00112384
LOC5572390	AAEL009779	Up	0.287424	0.0537534	0.000152834
LOC5567855	AAEL006309	Up	0.284772	0.0659977	0.000646833
LOC110677919	AAEL020749	Up	0.284348	0.00699814	7.31673e-05
LOC5568468	AAEL006887	Up	0.283112	0.0404098	9.82033e-05
LOC5571492	AAEL001615	Up	0.282672	0.0422074	0.00129382
LOC110678029	AAEL021557	Up	0.282613	0.0203025	6.27609e-06
LOC5567291	AAEL005944	Up	0.282438	0.0347985	7.34509e-05
LOC5565604	AAEL004884	Up	0.282358	0.0826881	0.00170218
LOC5576734	AAEL020340	Up	0.281974	0.0224962	1.99988e-05
LOC5578491	AAEL003555	Up	0.281974	0.0757022	0.00340929
LOC5580182	AAEL002560	Up	0.281212	0.0335915	0.000391977
LOC110676270	AAEL023490	Up	0.28099	0.107746	0.00679864
LOC5576219	AAEL002843	Up	0.280712	0.0787428	0.00103733
LOC5579111	AAEL003835	Up	0.280624	0.0288215	4.04542e-05
LOC5567791	AAEL018110	Up	0.280234	0.0252165	2.861e-05
LOC23687474	AAEL017054	Up	0.278862	0.065747	0.000781571
LOC5578532	AAEL013739	Up	0.277698	0.0240527	1.15671e-05
LOC5567852	AAEL006313	Up	0.277489	0.0764027	0.00134571
LOC23687857	AAEL017437	Up	0.276225	0.0216932	4.6769e-05
LOC5566155	AAEL027594	Up	0.276121	0.0402745	0.000166512
LOC23687616	AAEL020614	Up	0.276014	0.0700499	0.00121427
LOC5567718	AAEL006285	Up	0.274694	0.0525753	0.000183607
LOC5577930	AAEL025363	Up	0.273389	0.0270901	3.65047e-05
LOC5565400	AAEL004783	Up	0.273194	0.00999601	7.38831e-05
LOC5573005	AAEL001931	Up	0.272329	0.0783641	0.00203908
LOC5571990	AAEL009458	Up	0.271907	0.0383253	0.000113264
LOC5580065	AAEL002161	Up	0.271731	0.0340841	6.28834e-05
LOC5565138	AAEL004643	Up	0.270996	0.0568953	0.000340637
LOC5570915	AAEL001506	Up	0.270371	0.0587401	0.000229799
LOC5575203	AAEL011667	Up	0.269256	0.0790562	0.00441704
LOC5570528	AAEL001427	Up	0.268994	0.0543683	0.00027127
LOC5578158	AAEL013531	Up	0.268934	0.0811903	0.00259247
LOC5569529	AAEL007699	Up	0.268506	0.00600188	3.12393e-05
LOC5566760	AAEL005618	Up	0.268323	0.0348344	3.07204e-05
LOC5574815	AAEL002488	Up	0.267374	0.0805695	0.00195893
LOC5575804	AAEL012081	Up	0.266131	0.0848881	0.00315851
LOC110676249	AAEL024520	Up	0.265869	0.0287281	9.89494e-05
LOC5576901	AAEL014640	Up	0.265799	0.0231703	9.28337e-06
LOC5568912	AAEL007203	Up	0.26513	0.0784875	0.00192729
LOC5573002	AAEL001917	Up	0.264933	0.0381205	0.0001355
LOC5574023	AAEL010868	Up	0.264563	0.0596618	0.000608246
LOC5569463	AAEL022229	Up	0.264343	0.0546354	0.000169363
LOC5575985	AAEL021418	Up	0.262759	0.0523085	0.000248359
LOC5572725	AAEL009994	Up	0.262704	0.0069985	7.56979e-05
LOC5574605	AAEL002433	Up	0.262223	0.0523919	0.000306646
LOC5574188	AAEL002292	Up	0.26157	0.0453892	0.00148136
LOC5575752	AAEL002728	Up	0.26043	0.0489394	8.70231e-05
LOC5567109	AAEL005832	Up	0.259504	0.0213406	1.08958e-05
LOC5570824	AAEL008600	Up	0.25931	0.0224908	2.89723e-06
LOC5571008	AAEL008728	Up	0.259103	0.0555607	0.000278089
LOC110679379	AAEL022812	Up	0.258593	0.0824894	0.00320552
LOC5573577	AAEL002097	Up	0.258471	0.0758196	0.00141928
LOC5567595	AAEL006193	Up	0.25831	0.0834498	0.00239952
LOC5567828	AAEL021176	Up	0.257542	0.052005	0.000594339
LOC5564544	AAEL004319	Up	0.257175	0.0484295	0.000258803
LOC5578008	AAEL003377	Up	0.25445	0.0529475	0.000219386
LOC5568500	AAEL006910	Up	0.254332	0.0790236	0.00274108
LOC5567650	AAEL006238	Up	0.254057	0.0196173	2.52504e-05
LOC5571053	AAEL008769	Up	0.253541	0.0236659	2.6893e-06
LOC5579811	AAEL005527	Up	0.25339	0.0805837	0.00239952
LOC5573371	AAEL010468	Up	0.252943	0.0442489	0.000169097
LOC110675740	AAEL027914	Up	0.252501	0.0759042	0.00226202
LOC5566566	AAEL005481	Up	0.252135	0.0227609	5.78079e-06
LOC5568929	AAEL007245	Up	0.252045	0.064141	0.00099538
LOC5573581	AAEL002107	Up	0.251131	0.0226351	1.32071e-05
LOC5566141	AAEL005197	Up	0.250818	0.0586827	0.000657226
LOC5565063	AAEL004554	Up	0.250788	0.0697934	0.00143246
LOC110676505	AAEL020800	Up	0.250096	0.0384113	0.000183765
LOC5574619	AAEL008693	Up	0.248735	0.0571514	0.000786303
LOC5573004	AAEL001943	Up	0.248346	0.0491714	0.000327132
LOC5578525	AAEL013728	Up	0.246813	0.0713779	0.00266638
LOC5578854	AAEL003730	Up	0.246329	0.0580952	0.000389462
LOC5569643	AAEL007790	Up	0.246297	0.06116	0.00118533
LOC5577761	AAEL003298	Up	0.245745	0.0172081	1.55935e-06
LOC23687673	AAEL014271	Up	0.245443	0.0198981	0.000479691
LOC5580056	AAEL002174	Up	0.244778	0.0299645	1.22235e-05
LOC5575941	AAEL012185	Up	0.244642	0.0433665	0.00017742
LOC5566373	AAEL005353	Up	0.244397	0.0300995	2.52972e-05
LOC5573870	AAEL010791	Up	0.243933	0.066791	0.00185162
LOC5574043	AAEL010883	Up	0.243886	0.0330092	4.39095e-05
LOC5576906	AAEL012851	Up	0.243135	0.0502307	0.0003928
LOC5572991	AAEL022452	Up	0.242123	0.0509679	0.000589332
LOC5575729	AAEL012041	Up	0.241223	0.0500185	0.000483963
LOC110674007	AAEL007669	Up	0.241038	0.0494287	0.000670545
LOC5573228	AAEL010316	Up	0.240611	0.0587874	0.00104072
LOC5573395	AAEL002068	Up	0.240591	0.0365272	6.00253e-05
LOC23687406	AAEL016986	Up	0.240475	0.0673945	0.00175593
LOC5564532	AAEL014501	Up	0.240326	0.0377739	0.000129453
LOC110681523	AAEL024070	Up	0.240189	0.038856	5.893e-05
LOC5564062	AAEL004056	Up	0.240048	0.0558741	0.000496244
LOC5578096	AAEL003424	Up	0.239392	0.027518	3.41138e-05
LOC5563625	AAEL000022	Up	0.23826	0.0463899	0.00192004
LOC5573434	AAEL010476	Up	0.237631	0.0832751	0.00539892
LOC5565516	AAEL012284	Up	0.237085	0.0414862	0.00143622
LOC5577200	AAEL013083	Up	0.236966	0.0335459	0.000609893
LOC5565275	AAEL026452	Up	0.236866	0.0839397	0.00359928
LOC5575585	AAEL019950	Up	0.236741	0.0548964	0.000560571
LOC5569754	AAEL007914	Up	0.235486	0.0684929	0.00246683
LOC5567883	AAEL006353	Up	0.234687	0.057857	0.00117687
LOC5565340	AAEL014828	Up	0.234572	0.0583894	0.000657346
LOC5567950	AAEL006390	Up	0.234485	0.0198092	0.000228606
LOC5575611	AAEL027674	Up	0.234417	0.0192969	0.000199898
LOC5571886	AAEL019788	Up	0.234215	0.0380338	0.000110529
LOC5579836	AAEL005868	Up	0.234045	0.0147687	0.000232248
LOC5565774	AAEL004988	Up	0.233497	0.0335473	7.18656e-05
LOC5572288	AAEL001778	Up	0.233404	0.0786016	0.00319936
LOC5573614	AAEL010620	Up	0.232694	0.0611048	0.00100901
LOC5570154	AAEL008120	Up	0.232369	0.0747391	0.00334072
LOC5571563	AAEL004844	Up	0.232249	0.0769115	0.00329047
LOC5564088	AAEL007501	Up	0.231504	0.04451	0.000590692
LOC5572836	AAEL010065	Up	0.231318	0.0276938	5.44012e-05
LOC5577175	AAEL013045	Up	0.231235	0.0750501	0.00339932
LOC5568501	AAEL006917	Up	0.230228	0.0801177	0.00439912
LOC5570325	AAEL001379	Up	0.230083	0.0507078	0.000709112
LOC5566843	AAEL000823	Up	0.229151	0.00615216	7.92845e-05
LOC5575688	AAEL012007	Up	0.229111	0.0601491	0.00106124
LOC5571299	AAEL001541	Up	0.229088	0.0738019	0.00358321
LOC5565024	AAEL014704	Up	0.228846	0.0606559	0.00107488
LOC5577382	AAEL018314	Up	0.228352	0.069856	0.00227018
LOC5571775	AAEL009291	Up	0.227989	0.0809388	0.00439912
LOC5578401	AAEL013689	Up	0.227355	0.0152288	0.000246626
LOC5573000	AAEL026920	Up	0.227186	0.0750826	0.00339932
LOC5579196	AAEL014037	Up	0.226812	0.05199	0.000443176
LOC5571057	AAEL008811	Up	0.225966	0.0786749	0.004999
LOC5573219	AAEL010317	Up	0.22596	0.0565848	0.000791582
LOC5566015	AAEL005111	Up	0.22594	0.0323848	0.000431729
LOC5573578	AAEL002089	Up	0.22517	0.0396254	0.000278133
LOC5566746	AAEL005615	Up	0.224849	0.0560871	0.00232869
LOC110675634	AAEL021952	Up	0.224317	0.082827	0.00819836
LOC5573413	AAEL002047	Up	0.223504	0.00564277	9.23136e-05
LOC5567515	AAEL006139	Up	0.223438	0.0419497	0.000194241
LOC5572998	AAEL019851	Up	0.223438	0.0594317	0.000684998
LOC5571086	AAEL026403	Up	0.223227	0.0630858	0.00144579
LOC5566893	AAEL000851	Up	0.222908	0.0540491	0.000990914
LOC5571036	AAEL008763	Up	0.22162	0.0604861	0.00121733
LOC5574596	AAEL002426	Up	0.221374	0.0478381	0.000349704
LOC5579654	AAEL003970	Up	0.220182	0.0126698	0.000257418
LOC5580329	AAEL013069	Up	0.219875	0.00796223	9.14302e-08
LOC5576661	AAEL012687	Up	0.219269	0.0610403	0.00163018
LOC5573731	AAEL000301	Up	0.219056	0.0439892	0.000309352
LOC5563977	AAEL004017	Up	0.218998	0.0598024	0.00174726
LOC5568538	AAEL006956	Up	0.218983	0.0392214	0.00025226
LOC5569056	AAEL007343	Up	0.218714	0.0562959	0.000790673
LOC5575279	AAEL014896	Up	0.218656	0.0175775	8.10398e-06
LOC5579059	AAEL013999	Up	0.21811	0.0703412	0.00319936
LOC5578379	AAEL013662	Up	0.216076	0.0771995	0.00739852
LOC5576379	AAEL012476	Up	0.215466	0.0825237	0.0079984
LOC5575982	AAEL019430	Up	0.214677	0.0375454	0.00104206
LOC5565590	AAEL004889	Up	0.214365	0.0823265	0.0117976
LOC5563784	AAEL003938	Up	0.214182	0.0636566	0.00154084
LOC5574438	AAEL011158	Up	0.213413	0.0497875	0.000460269
LOC5569445	AAEL001235	Up	0.212889	0.0792915	0.0079984
LOC5568091	AAEL006522	Up	0.212442	0.0536553	0.000716198
LOC5569128	AAEL024053	Up	0.212069	0.057473	0.0016603
LOC5570164	AAEL014153	Up	0.211981	0.0677597	0.00279166
LOC5568139	AAEL020846	Up	0.211679	0.0306454	0.00021794
LOC23687936	AAEL017516	Up	0.210989	0.00605621	5.12966e-05
LOC5565637	AAEL014915	Up	0.210819	0.0472286	0.000300882
LOC5580030	AAEL009653	Up	0.210772	0.00631177	4.59147e-05
LOC5579167	AAEL021925	Up	0.2094	0.0269616	0.000737864
LOC110674016	AAEL022632	Up	0.209073	0.0236449	2.54675e-05
LOC5576729	AAEL002950	Up	0.208418	0.0403946	0.000439343
LOC5580119	AAEL023223	Up	0.207128	0.0273676	3.56896e-05
LOC5576852	AAEL012835	Up	0.207055	0.0425865	0.000179315
LOC5567163	AAEL005901	Up	0.207008	0.00771953	0.00010548
LOC5573067	AAEL010248	Up	0.206506	0.0490864	0.000897359
LOC5578344	AAEL003537	Up	0.20619	0.0803783	0.0113977
LOC5564308	AAEL000594	Up	0.206181	0.0727473	0.00479904
LOC5568516	AAEL006929	Up	0.20618	0.0656867	0.00286952
LOC5563945	AAEL014248	Up	0.2055	0.0635522	0.00219452
LOC110681498	AAEL023347	Up	0.205213	0.0272617	3.58849e-05
LOC110676223	AAEL027472	Up	0.20457	0.0818415	0.0143971
LOC5575797	AAEL012074	Up	0.204464	0.0491524	0.000374774
LOC5568602	AAEL001103	Up	0.204331	0.0266455	3.51453e-05
LOC5571934	AAEL018178	Up	0.204279	0.0612519	0.00208251
LOC5565118	AAEL014734	Up	0.204238	0.0309962	4.24545e-05
LOC5575015	AAEL011570	Up	0.20411	0.0825727	0.0141972
LOC5569780	AAEL007926	Up	0.203603	0.0161098	0.000317905
LOC110677764	AAEL024434	Up	0.203074	0.00603245	9.41385e-05
LOC5576478	AAEL002906	Up	0.203039	0.0695786	0.00279944
LOC5576407	AAEL012500	Up	0.202674	0.0813117	0.0135973
LOC5578313	AAEL013625	Up	0.20229	0.00703755	0.000144101
LOC5572192	AAEL009608	Up	0.20204	0.0413569	0.000475413
LOC5579923	AAEL006808	Up	0.201217	0.0766578	0.00839832
LOC23687643	AAEL028052	Up	0.201194	0.0572073	0.00149395
LOC5579939	AAEL019925	Up	0.200945	0.0657875	0.00259948
LOC5566525	AAEL005455	Up	0.200567	0.0209817	8.33658e-06
LOC5572269	AAEL001775	Up	0.200561	0.0706905	0.00439912
LOC5576538	AAEL020236	Up	0.200162	0.0798401	0.0141972
LOC5570206	AAEL008170	Up	0.200054	0.0744443	0.00719856
LOC5568522	AAEL006934	Up	0.199742	0.0494049	0.000451178
LOC5576302	AAEL012460	Up	0.199281	0.0654947	0.00359928
LOC5568230	AAEL006676	Up	0.199053	0.0640652	0.00239952
LOC5578608	AAEL027860	Up	0.199017	0.0543814	0.00136947
LOC5578839	AAEL019482	Up	0.198476	0.0179873	0.000389835
LOC5570983	AAEL008706	Up	0.198373	0.0598062	0.00248585
LOC5564784	AAEL004430	Up	0.198023	0.0534931	0.00130166
LOC5568185	AAEL027007	Up	0.197276	0.0508554	0.000749181
LOC5573966	AAEL010827	Up	0.196755	0.0731372	0.0069986
LOC5578080	AAEL003435	Up	0.196354	0.0813028	0.0157968
LOC5570148	AAEL008134	Up	0.196343	0.0327448	0.00111579
LOC5572017	AAEL000244	Up	0.196176	0.0410187	0.000285061
LOC5574569	AAEL011239	Up	0.196107	0.045398	0.0024131
LOC5564972	AAEL004523	Up	0.196085	0.0217305	1.34175e-05
LOC5571771	AAEL009288	Up	0.194984	0.0568507	0.0016816
LOC5571774	AAEL021394	Up	0.194219	0.0538123	0.00143498
LOC5563781	AAEL003945	Up	0.193831	0.0660983	0.00359928
LOC5572446	AAEL001805	Up	0.192935	0.0811793	0.0175965
LOC5564872	AAEL004455	Up	0.192903	0.0368195	0.000164665
LOC5578793	AAEL003676	Up	0.192545	0.0174865	1.73575e-06
LOC5577021	AAEL012940	Up	0.191847	0.0284371	2.96365e-05
LOC5568224	AAEL006654	Up	0.191842	0.0786927	0.0135973
LOC110679163	AAEL000427	Up	0.191812	0.0366408	0.00136838
LOC5572772	AAEL010042	Up	0.191292	0.0678653	0.00539892
LOC5565316	AAEL004726	Up	0.190982	0.0327423	0.000256674
LOC5569472	AAEL007656	Up	0.190847	0.0589764	0.00266006
LOC110676462	AAEL019778	Up	0.190313	0.049952	0.000576911
LOC5573470	AAEL010511	Up	0.189823	0.0798121	0.020196
LOC5576287	AAEL012439	Up	0.189771	0.036386	0.00129916
LOC5572751	AAEL010027	Up	0.189351	0.0693503	0.00679864
LOC5566235	AAEL005263	Up	0.18924	0.042809	0.00055889
LOC5568961	AAEL007247	Up	0.18904	0.063139	0.00239952
LOC5570675	AAEL008481	Up	0.189033	0.00604114	0.000101305
LOC5566771	AAEL005635	Up	0.188955	0.0519561	0.00149841
LOC5564926	AAEL004497	Up	0.187665	0.0491675	0.00147541
LOC5572316	AAEL009708	Up	0.187076	0.0323972	0.00044368
LOC5568605	AAEL006972	Up	0.186968	0.0660158	0.00459908
LOC5570605	AAEL027597	Up	0.186914	0.0587922	0.00218707
LOC5576530	AAEL024479	Up	0.185668	0.0527083	0.00163373
LOC5571005	AAEL008743	Up	0.18558	0.0774967	0.0165967
LOC5572053	AAEL001706	Up	0.185146	0.0524107	0.00167195
LOC5568678	AAEL007030	Up	0.184847	0.0529072	0.00187893
LOC5571509	AAEL001619	Up	0.184722	0.0499047	0.00286357
LOC5572046	AAEL000227	Up	0.184483	0.0593943	0.00236935
LOC5575632	AAEL011960	Up	0.184213	0.0792566	0.020196
LOC5577889	AAEL013402	Up	0.183862	0.0733041	0.0123975
LOC5571615	AAEL009202	Up	0.183764	0.0535417	0.00157782
LOC5578368	AAEL003530	Up	0.183487	0.00689408	0.000153369
LOC5574529	AAEL011206	Up	0.183294	0.0702525	0.00859828
LOC5570375	AAEL021941	Up	0.182923	0.051829	0.00199713
LOC5571082	AAEL018164	Up	0.182581	0.0526847	0.00122349
LOC5565685	AAEL004933	Up	0.18243	0.0529937	0.00211205
LOC5575759	AAEL019529	Up	0.182295	0.0694819	0.00939812
LOC5576426	AAEL012523	Up	0.181263	0.0606833	0.00359928
LOC5569339	AAEL007536	Up	0.181089	0.0617483	0.00439912
LOC5578027	AAEL003366	Up	0.180665	0.0582466	0.0033543
LOC5576569	AAEL012624	Up	0.180222	0.0653714	0.00519896
LOC5573190	AAEL001959	Up	0.180168	0.0315396	0.00108171
LOC110675803	AAEL023679	Up	0.17964	0.0687576	0.00979804
LOC5577356	AAEL000417	Up	0.179567	0.0232809	4.01193e-05
LOC5577616	AAEL003264	Up	0.1761	0.0822361	0.0383923
LOC5575933	AAEL012162	Up	0.175895	0.0478799	0.00333711
LOC5565455	AAEL000654	Up	0.175372	0.0366005	0.00146961
LOC5575846	AAEL012119	Up	0.175112	0.030096	6.98347e-05
LOC5574380	AAEL011097	Up	0.174893	0.0783749	0.0241952
LOC5567589	AAEL006175	Up	0.174275	0.0597421	0.00439912
LOC5564756	AAEL014605	Up	0.174245	0.0276504	0.000102208
LOC5577809	AAEL013389	Up	0.173776	0.0347517	0.000401892
LOC5563590	AAEL000032	Up	0.173246	0.00634977	0.000143436
LOC5572374	AAEL009764	Up	0.17288	0.0310362	0.000777732
LOC5579005	AAEL022914	Up	0.172236	0.0688577	0.0123975
LOC5575105	AAEL011656	Up	0.172071	0.00682792	0.000154198
LOC110678198		Up	0.17133	0.0253743	5.07469e-05
LOC5576033	AAEL012261	Up	0.171313	0.0734423	0.0215957
LOC5574509	AAEL015107	Up	0.170921	0.0842107	0.0433913
LOC5567996	AAEL006441	Up	0.170886	0.0317711	0.000244825
LOC5572599	AAEL009912	Up	0.170397	0.0495682	0.00163218
LOC5570339	AAEL019977	Up	0.170247	0.0242188	4.71291e-05
LOC5576758	AAEL025553	Up	0.170023	0.00613274	6.2366e-05
LOC5566861	AAEL000802	Up	0.169923	0.0719551	0.0171966
LOC5565948	AAEL005075	Up	0.169918	0.0832009	0.0455909
LOC5565500	AAEL021641	Up	0.169712	0.066655	0.009998
LOC5568355	AAEL001061	Up	0.169615	0.0503746	0.00427034
LOC5575852	AAEL012120	Up	0.169477	0.0369652	0.000320226
LOC5566097	AAEL005169	Up	0.169285	0.0786362	0.0317936
LOC5569584	AAEL001270	Up	0.168985	0.0809122	0.0365927
LOC5578856	AAEL003713	Up	0.168984	0.0419274	0.0026226
LOC5573850	AAEL010768	Up	0.168708	0.0844843	0.0473905
LOC5564228	AAEL004161	Up	0.167825	0.0486446	0.00110609
LOC5565651	AAEL004905	Up	0.167371	0.072944	0.0223955
LOC5573119	AAEL001997	Up	0.167365	0.0427192	0.000928409
LOC5574435	AAEL011161	Up	0.16729	0.0579235	0.00439912
LOC5578012	-	Up	0.166971	0.0779841	0.035193
LOC5564364	AAEL013783	Up	0.166952	0.0279144	0.000198841
LOC5570661	AAEL008478	Up	0.166262	0.0382777	0.000327521
LOC5575604	AAEL011934	Up	0.16592	0.0704281	0.0195961
LOC5577105	AAEL013005	Up	0.165823	0.0361503	0.000345719
LOC5568838	AAEL001169	Up	0.165261	0.0536867	0.00259948
LOC5572837	AAEL010061	Up	0.165018	0.0603331	0.00839832
LOC5564076	AAEL014295	Up	0.164467	0.0455338	0.000975131
LOC5564855	AAEL018348	Up	0.164158	0.080471	0.0409918
LOC5565190	AAEL014749	Up	0.163926	0.0608245	0.00759848
LOC5567772	AAEL000143	Up	0.16324	0.0557971	0.00279944
LOC5578715	AAEL013825	Up	0.163098	0.0792679	0.0467906
LOC5571204	AAEL026355	Up	0.162947	0.0730378	0.0289942
LOC5576801	AAEL012778	Up	0.162581	0.019715	0.00021838
LOC5568165	AAEL006628	Up	0.162477	0.0500177	0.00155527
LOC5571197	AAEL008886	Up	0.162468	0.0406328	0.00061911
LOC5568223	AAEL006646	Up	0.162425	0.0753094	0.0305939
LOC110679672	AAEL027916	Up	0.161929	0.0580607	0.00639872
LOC5574167	AAEL010977	Up	0.160709	0.0092265	3.18597e-06
LOC5568419	AAEL006845	Up	0.15981	0.0724948	0.0269946
LOC5568842	AAEL019565	Up	0.15909	0.0661453	0.014997
LOC23687442	AAEL017022	Up	0.158621	0.00907088	1.07414e-06
LOC5571265	AAEL001588	Up	0.158348	0.0275616	8.34704e-05
LOC5566092	AAEL005170	Up	0.157767	0.0101397	0.000264175
LOC5567997	AAEL006438	Up	0.157508	0.0596186	0.00839832
LOC5568201	AAEL006637	Up	0.156677	0.0776269	0.0463907
LOC5577011	AAEL012924	Up	0.156371	0.0408842	0.000712007
LOC5565919	AAEL000701	Up	0.156149	0.0446322	0.00124636
LOC5563639	AAEL000020	Up	0.156085	0.0561909	0.0069986
LOC5572032	AAEL000230	Up	0.154978	0.0621323	0.0139972
LOC5569309	AAEL007556	Up	0.15482	0.0318661	0.000179654
LOC5570370	AAEL008275	Up	0.154415	0.0307402	0.000562579
LOC5573790	AAEL010716	Up	0.154147	0.0223935	3.33389e-05
LOC5567075	AAEL005799	Up	0.154138	0.0498385	0.00379924
LOC5566612	AAEL000770	Up	0.153883	0.0433185	0.000948191
LOC5564865	AAEL018323	Up	0.153393	0.0318405	0.000477512
LOC5564775	AAEL004425	Up	0.152908	0.0558195	0.00539892
LOC5574673	AAEL011315	Up	0.151792	0.0510492	0.0029994
LOC5565892	AAEL000713	Up	0.151662	0.013597	0.000340829
LOC5569122	AAEL007383	Up	0.151505	0.00990712	8.52156e-06
LOC5578966	AAEL013950	Up	0.151087	0.0386898	0.000788014
LOC5574289	AAEL011050	Up	0.15107	0.0368906	0.00072011
LOC5571179	AAEL008857	Up	0.15069	0.0287335	7.9154e-05
LOC5576409	AAEL023114	Up	0.150673	0.0319914	0.000343202
LOC110675782	AAEL025123	Up	0.150342	0.0750548	0.0485903
LOC5575037	AAEL011587	Up	0.149796	0.00630912	0.00010029
LOC5576041	AAEL022891	Up	0.148926	0.0561007	0.00559888
LOC5569517	AAEL007697	Up	0.148912	0.0530096	0.004999
LOC5576963	AAEL003084	Up	0.148378	0.0534763	0.00679864
LOC5565181	AAEL004646	Up	0.148171	0.0347167	0.000904087
LOC5566236	AAEL005269	Up	0.147792	0.0110797	6.40728e-06
LOC5564255	AAEL004193	Up	0.147675	0.0437479	0.00200584
LOC5574844	AAEL011447	Up	0.147524	0.00595787	5.28315e-05
LOC5575494	AAEL020018	Up	0.146909	0.0405612	0.0010659
LOC5563743	AAEL014094	Up	0.146475	0.0574272	0.00979804
LOC5574409	AAEL011135	Up	0.146356	0.0622063	0.0185963
LOC5574612	AAEL011255	Up	0.146249	0.0212176	5.3082e-05
LOC5568395	AAEL006779	Up	0.146099	0.0645105	0.024795
LOC5574290	AAEL011051	Up	0.145654	0.0465494	0.00347886
LOC5576609	AAEL012635	Up	0.145359	0.0622005	0.0173965
LOC5577917	AAEL003326	Up	0.145358	0.0408125	0.00133137
LOC5577747	AAEL003293	Up	0.145339	0.0494768	0.00439912
LOC5575716	AAEL012034	Up	0.145181	0.063681	0.020196
LOC5568156	AAEL002345	Up	0.144689	0.0702733	0.0359928
LOC5568848	AAEL007158	Up	0.144535	0.0439949	0.00170367
LOC5570559	AAEL008366	Up	0.144148	0.0652542	0.029794
LOC5579447	AAEL015425	Up	0.144102	0.0711927	0.0393921
LOC5570277	AAEL008195	Up	0.143385	0.0299549	0.000413433
LOC23687841	AAEL017421	Up	0.142612	0.0268349	0.000152278
LOC5571753	AAEL009272	Up	0.141729	0.0640027	0.0277944
LOC5567848	AAEL000987	Up	0.140797	0.00602139	0.000116045
LOC5574388	AAEL011105	Up	0.140541	0.0317863	0.00020626
LOC5563588	AAEL000001	Up	0.140484	0.0480548	0.00439912
LOC5577256	AAEL013114	Up	0.139845	0.0604348	0.0189962
LOC5573532	AAEL010558	Up	0.139581	0.0369374	0.0028526
LOC5579906	AAEL001037	Up	0.139248	0.0526973	0.00739852
LOC5567634	AAEL006221	Up	0.138273	0.0637432	0.0313937
LOC5568406	AAEL006823	Up	0.137875	0.0607808	0.0189962
LOC5574387	AAEL019777	Up	0.137281	0.0540173	0.0107978
LOC5570741	AAEL008514	Up	0.137272	0.0558998	0.0129974
LOC5570243	AAEL008192	Up	0.137195	0.00686319	0.000171011
LOC5575410	AAEL011814	Up	0.13689	0.0476499	0.00239952
LOC5574872	AAEL011476	Up	0.136837	0.0469918	0.00339932
LOC5575790	AAEL012062	Up	0.136751	0.0118597	2.27239e-05
LOC5577377	AAEL000428	Up	0.136647	0.0152224	0.00043416
LOC5568103	AAEL006538	Up	0.135812	0.0214071	0.00021657
LOC5572777	AAEL010052	Up	0.135242	0.0652494	0.0321936
LOC5572600	AAEL009911	Up	0.135079	0.0453461	0.00359928
LOC5572386	-	Up	0.134942	0.058277	0.020196
LOC110676736	AAEL028202	Up	0.134875	0.0361238	0.00147853
LOC5580192	AAEL002551	Up	0.134551	0.0257947	0.000397989
LOC5575411	AAEL011817	Up	0.134396	0.0609017	0.030194
LOC5568059	AAEL006502	Up	0.134331	0.049846	0.00759848
LOC5577341	AAEL000408	Up	0.1341	0.0602655	0.0271946
LOC5573290	AAEL010368	Up	0.133798	0.0412623	0.00184417
LOC5564556	AAEL004325	Up	0.133758	0.00677337	6.0966e-07
LOC5572090	AAEL009496	Up	0.133679	0.00672039	2.32226e-06
LOC5568716	AAEL007049	Up	0.133287	0.0283192	0.000316044
LOC5579114	AAEL003831	Up	0.132962	0.0246896	0.000267183
LOC5575778	AAEL021746	Up	0.132881	0.0538827	0.0123975
LOC5577996	AAEL003396	Up	0.132613	0.00593567	0.000145515
LOC5573858	AAEL010782	Up	0.13229	0.0188465	7.16337e-05
LOC5573056	AAEL014262	Up	0.132167	0.0572279	0.0155969
LOC5578594	AAEL013771	Up	0.12982	0.0388085	0.00188239
LOC5576321	AAEL000394	Up	0.129713	0.0483973	0.00839832
LOC5572907	AAEL010118	Up	0.129308	0.062626	0.0411918
LOC5563671	AAEL000562	Up	0.128371	0.0574339	0.0265947
LOC5570455	AAEL008341	Up	0.128309	0.0244713	0.00102702
LOC5580259	AAEL012585	Up	0.12797	0.00615719	0.000236808
LOC5579938	AAEL019926	Up	0.127722	0.0341527	0.00276877
LOC5566981	AAEL019523	Up	0.127504	0.0331072	0.00236238
LOC5573939	AAEL019753	Up	0.127503	0.0457204	0.00559888
LOC110675288	AAEL023028	Up	0.127382	0.0401232	0.0027915
LOC5570990	AAEL008716	Up	0.127145	0.0606618	0.039792
LOC5570868	AAEL008636	Up	0.12678	0.0622714	0.0413917
LOC5566959	AAEL005722	Up	0.126615	0.00603451	8.36604e-05
LOC5574439	AAEL011156	Up	0.126224	0.0273277	0.000869437
LOC5576028	AAEL012266	Up	0.125412	0.0388587	0.00214667
LOC5568387	AAEL006771	Up	0.125108	0.0246011	0.000238095
LOC110678056	AAEL027336	Up	0.124962	0.0359515	0.00401413
LOC5565680	AAEL004936	Up	0.124681	0.0624833	0.0435913
LOC5576198	AAEL012390	Up	0.12445	0.0439876	0.00259948
LOC5569604	AAEL001275	Up	0.124198	0.0263328	0.000472457
LOC5578997	AAEL003776	Up	0.124035	0.0547202	0.0181964
LOC5572048	AAEL024346	Up	0.123898	0.0504152	0.0135973
LOC5573409	AAEL026571	Up	0.123504	0.046718	0.009998
LOC5570916	AAEL001501	Up	0.123479	0.0295324	0.000649107
LOC5565683	AAEL004920	Up	0.123234	0.0488776	0.0113977
LOC5579911	AAEL001047	Up	0.122215	0.0615659	0.0473905
LOC110678895	AAEL020363	Up	0.122089	0.0637608	0.0469906
LOC5573421	AAEL002049	Up	0.121783	0.0380167	0.00250674
LOC5565330	AAEL014821	Up	0.121398	0.0327389	0.00115776
LOC23687436	AAEL025841	Up	0.120822	0.0597659	0.034793
LOC5569576	AAEL007767	Up	0.120698	0.0508967	0.0165967
LOC5566483	AAEL005413	Up	0.119717	0.0567575	0.0357928
LOC5567505	AAEL006118	Up	0.118971	0.0361864	0.00425082
LOC110674163	AAEL022901	Up	0.118957	0.0297967	0.00155358
LOC5579328	AAEL023188	Up	0.11862	0.0366712	0.00181381
LOC5576021	AAEL019755	Up	0.118298	0.0482117	0.0157968
LOC5564786	AAEL004440	Up	0.117135	0.0453027	0.0105979
LOC5578654	AAEL024913	Up	0.117122	0.0566606	0.0377924
LOC5569713	AAEL007854	Up	0.117024	0.0601614	0.0467906
LOC5573751	AAEL000294	Up	0.116523	0.0119997	0.000341728
LOC5569483	AAEL007667	Up	0.116317	0.0516931	0.0263947
LOC5568451	AAEL006862	Up	0.11622	0.0504558	0.0205959
LOC5570727	AAEL018237	Up	0.115744	0.0553139	0.0305939
LOC5578103	AAEL003430	Up	0.115623	0.0525476	0.0245951
LOC5577326	AAEL000436	Up	0.11528	0.0390809	0.00479904
LOC5565832	AAEL005025	Up	0.115053	0.0519111	0.0267946
LOC5566372	AAEL005349	Up	0.114944	0.0313006	0.00112812
LOC5575450	AAEL002639	Up	0.114827	0.00661375	0.000152087
LOC5567454	AAEL000944	Up	0.114421	0.0194158	0.00128819
LOC5567331	AAEL015338	Up	0.11442	0.0521999	0.0279944
LOC5575718	AAEL012035	Up	0.114111	0.0127079	0.000634003
LOC5579658	AAEL003949	Up	0.113749	0.0582213	0.04999
LOC5566689	AAEL005579	Up	0.113379	0.0268687	0.000671658
LOC5573534	AAEL010584	Up	0.11301	0.0444038	0.0127974
LOC5570671	AAEL008469	Up	0.112798	0.0446571	0.0115977
LOC5571564	AAEL009151	Up	0.112404	0.00642202	7.74307e-05
LOC5568539	AAEL006951	Up	0.112347	0.0329167	0.00127761
LOC5570065	AAEL001339	Up	0.11187	0.0564122	0.0433913
LOC5565085	AAEL023069	Up	0.111338	0.038452	0.00479904
LOC5565979	AAEL005097	Up	0.111297	0.00682236	0.000203395
LOC5571230	AAEL019485	Up	0.11096	0.0305508	0.00208317
LOC5569924	AAEL008024	Up	0.110558	0.0509931	0.0311938
LOC5565923	AAEL000708	Up	0.110417	0.0513443	0.0309938
LOC5564796	AAEL004437	Up	0.109656	0.0527964	0.0395921
LOC5566987	AAEL005742	Up	0.109156	0.0294088	0.0011144
LOC5578206	AAEL003477	Up	0.109046	0.0561893	0.0473905
LOC5564012	AAEL014275	Up	0.108978	0.0244384	0.000493062
LOC5567476	AAEL000948	Up	0.108576	0.0172069	0.000153166
LOC5572732	AAEL009995	Up	0.108439	0.0407026	0.00779844
LOC5573217	AAEL010299	Up	0.107787	0.00636976	0.000269571
LOC5566398	AAEL005355	Up	0.107281	0.0436176	0.014797
LOC5577667	AAEL017244	Up	0.107155	0.0482545	0.0225955
LOC5578833	AAEL013876	Up	0.106806	0.0180361	0.000149706
LOC5571810	AAEL001705	Up	0.106238	0.04103	0.00979804
LOC5572534	AAEL009859	Up	0.106127	0.010253	9.0739e-06
LOC5572501	AAEL009829	Up	0.105872	0.0487561	0.0293941
LOC5576110	AAEL024908	Up	0.104433	0.0349647	0.00319936
LOC5567423	AAEL006070	Up	0.104208	0.0269175	0.0010809
LOC5576570	AAEL012621	Up	0.103907	0.0451155	0.0217956
LOC5565143	AAEL004607	Up	0.102303	0.0366806	0.00519896
LOC5572037	AAEL025431	Up	0.102115	0.0423176	0.0141972
LOC5579480	AAEL015314	Up	0.101864	0.0244342	0.000595165
LOC5568528	AAEL018126	Up	0.101807	0.0450973	0.0209958
LOC5568233	AAEL006667	Up	0.101494	0.0415942	0.0163967
LOC5567314	AAEL005968	Up	0.100326	0.0260232	0.000591112
LOC5571039	AAEL008784	Up	0.100023	0.0142631	0.000864477
LOC5574223	AAEL012382	Up	0.0999767	0.0169735	0.000757352
LOC5563630	AAEL000016	Up	0.0997566	0.04187	0.0169966
LOC5577034	AAEL012944	Up	0.0995971	0.00635807	0.000270952
LOC5569222	AAEL007494	Up	0.0990479	0.0118629	0.000576344
LOC5567256	AAEL029012	Up	0.0989795	0.043538	0.0215957
LOC5564882	AAEL004471	Up	0.0988998	0.0396125	0.0133973
LOC5569075	AAEL001215	Up	0.0978707	0.0393141	0.0137972
LOC5573370	AAEL010470	Up	0.0975648	0.028169	0.00213925
LOC5578101	AAEL003418	Up	0.0974548	0.0187702	0.000194864
LOC5566495	AAEL005429	Up	0.0964104	0.040234	0.0159968
LOC5570318	AAEL008257	Up	0.09586	0.0173834	0.000144444
LOC5578855	AAEL003709	Up	0.0956714	0.0421615	0.0215957
LOC5575640	AAEL011972	Up	0.0952749	0.0228656	0.00109226
LOC5566977	AAEL005739	Up	0.0952114	0.0387704	0.0127974
LOC5565624	AAEL014292	Up	0.095072	0.00610333	0.00016873
LOC23687624	AAEL017204	Up	0.0940367	0.0358765	0.00859828
LOC5579060	AAEL013992	Up	0.0935002	0.0231165	0.00100479
LOC5564520	AAEL014489	Up	0.093191	0.0461608	0.034993
LOC5570922	AAEL001503	Up	0.092065	0.0222823	0.0006492
LOC5577354	AAEL000424	Up	0.0920074	0.0196645	0.0002212
LOC5566220	AAEL005270	Up	0.0913543	0.00995767	0.000655929
LOC5576767	AAEL012751	Up	0.091269	0.0423816	0.0327934
LOC5574328	AAEL019424	Up	0.0911027	0.0374521	0.0129974
LOC5569675	AAEL019596	Up	0.0905668	0.0347332	0.00939812
LOC5567368	AAEL024841	Up	0.0904452	0.0413975	0.0273945
LOC5578184	AAEL003469	Up	0.0902137	0.0230625	0.000958774
LOC5578178	AAEL013790	Up	0.0898446	0.0412901	0.0277944
LOC5577483	AAEL013236	Up	0.0890795	0.0313807	0.00339932
LOC5574525	AAEL011202	Up	0.0882023	0.0420098	0.0305939
LOC5563786	AAEL003942	Up	0.0881106	0.00647288	0.000241757
LOC5575822	AAEL012092	Up	0.086868	0.0209707	0.000893395
LOC110674796	AAEL022712	Up	0.0868369	0.0359872	0.00979804
LOC5570827	AAEL008601	Up	0.0868295	0.0370421	0.0203959
LOC5570169	AAEL008141	Up	0.0857933	0.0375233	0.0193961
LOC5569120	AAEL007366	Up	0.0847427	0.0336861	0.0111978
LOC5568247	AAEL006663	Up	0.0846787	0.041938	0.0439912
LOC5576972	AAEL003076	Up	0.0841112	0.0404366	0.0385923
LOC5576653	AAEL012686	Up	0.0827224	0.00622388	0.000259301
LOC23687671	AAEL017251	Up	0.0826659	0.0375269	0.019996
LOC5569547	AAEL007718	Up	0.0825902	0.0194874	0.000340288
LOC5579024	AAEL013964	Up	0.0825167	0.0321271	0.00879824
LOC5565221	AAEL004682	Up	0.0820761	0.0386147	0.0355929
LOC5563966	AAEL004025	Up	0.0800062	0.0315436	0.0111978
LOC5569582	AAEL007771	Up	0.0800035	0.00642236	0.00021365
LOC110676224	AAEL020597	Up	0.0794887	0.0382827	0.0325935
LOC5577385	AAEL000467	Up	0.0794754	0.0335735	0.020196
LOC5569540	AAEL007717	Up	0.0794111	0.0332567	0.0143971
LOC5565051	AAEL004563	Up	0.0792788	0.0342149	0.0193961
LOC5567497	AAEL000953	Up	0.0792242	0.0350998	0.0211958
LOC5567070	AAEL005817	Up	0.0783136	0.0065331	0.000374726
LOC5566871	AAEL000845	Up	0.078294	0.0391779	0.0441912
LOC5579172	AAEL003888	Up	0.0778038	0.0140192	0.00014635
LOC5564542	AAEL004313	Up	0.0777796	0.0356244	0.0233953
LOC5572967	AAEL010159	Up	0.0776688	0.0239032	0.0023594
LOC5571846	AAEL023681	Up	0.0766181	0.00599275	0.000367908
LOC5566219	AAEL005255	Up	0.076217	0.0279998	0.00679864
LOC5571429	AAEL009066	Up	0.0756934	0.0167376	0.00180899
LOC5567031	AAEL005766	Up	0.0756631	0.0122801	0.000541962
LOC5566773	AAEL005628	Up	0.0752173	0.0365635	0.0375925
LOC5572365	AAEL009747	Up	0.074921	0.00658437	0.000509318
LOC5566633	AAEL000752	Up	0.0734501	0.0325115	0.0213957
LOC5573538	AAEL010582	Up	0.073055	0.0251477	0.00359928
LOC5566976	AAEL005744	Up	0.0723492	0.0207917	0.00135063
LOC5568828	AAEL001164	Up	0.0722071	0.0162222	0.00242892
LOC5568574	AAEL026410	Up	0.0694994	0.0237822	0.00319936
LOC5570139	AAEL008103	Up	0.069289	0.00591384	0.000505412
LOC5577555	AAEL013267	Up	0.0677956	0.0280619	0.0143971
LOC5573778	AAEL000293	Up	0.0674501	0.0272679	0.014797
LOC5576408	AAEL012502	Up	0.066697	0.0250525	0.00739852
LOC5567501	AAEL006115	Up	0.0653183	0.0150406	0.00224164
LOC5569015	AAEL007293	Up	0.0640332	0.0258998	0.0107978
LOC5567839	AAEL001005	Up	0.063977	0.0161251	0.00139512
LOC5573494	AAEL027554	Up	0.0639386	0.0272027	0.0181964
LOC5573827	AAEL010756	Up	0.0603504	0.00586072	0.000390046
LOC5574866	AAEL011471	Up	0.0589493	0.00566078	0.000489924
LOC23687618	AAEL017198	Up	0.0569933	0.00558635	0.000455773
LOC5574484	AAEL002401	Up	0.0567936	0.0270417	0.0311938
LOC5573492	AAEL010538	Up	0.056218	0.0267711	0.0319936
LOC5568583	AAEL001113	Up	0.0549256	0.0274265	0.0403919
LOC5578155	AAEL013533	Up	0.054096	0.0094828	0.000219644
LOC5570017	AAEL000208	Up	0.0540092	0.0219484	0.0115977
LOC5577626	AAEL003210	Up	0.0520333	0.0179859	0.00379924
LOC5570825	AAEL008599	Up	0.0520193	0.024802	0.0343931
LOC5564492	AAEL004294	Up	0.0511027	0.0245219	0.029794
LOC5572759	AAEL010017	Up	0.0507873	0.0134942	0.00169357
LOC110676232	AAEL023983	Up	0.0504952	0.00605978	0.000334562
LOC5576103	AAEL002797	Up	0.046226	0.0206965	0.0235953
LOC5570007	AAEL000175	Up	0.0459508	0.0198388	0.0189962
LOC5575041	AAEL011588	Up	0.0457323	0.0170959	0.00739852
LOC5572857	AAEL010070	Up	0.0437294	0.0205141	0.0295941
LOC5565553	AAEL022140	Up	0.043155	0.00727625	0.00103176
LOC5572748	AAEL010032	Up	0.0414692	0.0171598	0.0105979
LOC5578360	AAEL024675	Up	0.0403016	0.0155692	0.00919816
LOC5577178	AAEL013047	Up	0.0392124	0.0204738	0.044791
LOC5578505	AAEL013703	Up	0.0377202	0.00747831	0.000133863
LOC110676045	AAEL022286	Up	0.0325546	0.0068362	0.000237739
LOC5579525	AAEL014562	Up	0.0270942	0.00565895	0.00162065
LOC5574485	AAEL002372	Up	0.0261138	0.00643944	0.00281228
LOC23687404	AAEL016984	Up	0.0229029	0.0118979	0.0443911
LOC5571844	AAEL001703	Up	0.0211011	0.00742003	0.00279944
LOC5579186	AAEL003872	Up	0.0156947	0.00736327	0.0239952
LOC5568090	AAEL006511	Up	0.0154722	0.0061498	0.00759848
LOC5570244	AAEL008188	Up	0.0153455	0.00571735	0.00559888
LOC5578625	AAEL003582	Up	0.01506	0.00682815	0.0195961
LOC5565544	AAEL004855	Up	0.0149058	0.00624879	0.0141972
LOC5566522	AAEL005451	Down	-0.0167405	0.00585876	0.00739852
LOC5572634	AAEL001863	Down	-0.0243147	0.0115302	0.040192
LOC5568260	AAEL006698	Down	-0.0287899	0.00619188	0.00108165
LOC5564212	AAEL004151	Down	-0.0323592	0.00667102	0.00128253
LOC5564921	AAEL004500	Down	-0.0324136	0.00833739	0.00293906
LOC5579820	AAEL005524	Down	-0.0335222	0.0104902	0.00519116
LOC5576215	AAEL002832	Down	-0.0339488	0.00538321	0.000895936
LOC5566772	AAEL005629	Down	-0.0378423	0.00589626	0.000674149
LOC5573974	AAEL010821	Down	-0.039204	0.00714281	0.000143586
LOC5574665	AAEL011309	Down	-0.0409528	0.0202692	0.04999
LOC5564798	AAEL004423	Down	-0.0422926	0.0102735	0.000396095
LOC5567793	AAEL000138	Down	-0.042349	0.0173448	0.0159968
LOC5571937	AAEL009422	Down	-0.0466142	0.0171652	0.00939812
LOC5578734	AAEL003661	Down	-0.046659	0.0210728	0.0287942
LOC5572478	AAEL009808	Down	-0.0468568	0.0197431	0.0211958
LOC5570616	AAEL008434	Down	-0.0514846	0.0204638	0.014797
LOC5578801	AAEL003646	Down	-0.0523356	0.020048	0.0109978
LOC5575642	AAEL011985	Down	-0.0526953	0.0195136	0.00919816
LOC5578243	AAEL015006	Down	-0.0532281	0.0061688	0.000870118
LOC5571186	AAEL029013	Down	-0.0546451	0.00941942	0.000254754
LOC5580330	AAEL013071	Down	-0.057917	0.026769	0.0305939
LOC5569566	AAEL007752	Down	-0.0604178	0.00992648	0.00120591
LOC5570575	AAEL008394	Down	-0.061263	0.0217176	0.00539892
LOC5571450	AAEL009078	Down	-0.0618761	0.0178872	0.00445837
LOC5568542	AAEL020205	Down	-0.0619189	0.0296158	0.0363927
LOC5566723	AAEL015236	Down	-0.0622207	0.0273367	0.0239952
LOC5577080	AAEL012980	Down	-0.0624726	0.0285882	0.0279944
LOC5569074	AAEL001210	Down	-0.0630894	0.0184497	0.00408981
LOC23687788	AAEL017368	Down	-0.0642868	0.0313264	0.0417916
LOC5564525	AAEL014492	Down	-0.0655029	0.0276584	0.019796
LOC5567928	AAEL006364	Down	-0.0658494	0.0310475	0.0365927
LOC23687965	AAEL017545	Down	-0.0660514	0.0307881	0.0325935
LOC5566775	AAEL005638	Down	-0.066186	0.0177185	0.00359106
LOC5572848	AAEL010068	Down	-0.0668194	0.0296683	0.0233953
LOC5576672	AAEL012702	Down	-0.0674446	0.0190209	0.00120277
LOC5576414	AAEL012511	Down	-0.0677977	0.0241827	0.004999
LOC5573763	AAEL000269	Down	-0.0687354	0.00841018	1.1924e-05
LOC5578575	AAEL013760	Down	-0.0690513	0.0274104	0.0119976
LOC5578117	AAEL003417	Down	-0.0695155	0.0327748	0.0339932
LOC5572655	AAEL001837	Down	-0.069595	0.0256469	0.00839832
LOC5566009	AAEL005106	Down	-0.0696464	0.0304324	0.0237952
LOC5566298	AAEL000746	Down	-0.0697563	0.029316	0.0181964
LOC5575986	AAEL002764	Down	-0.0697806	0.0185267	0.000938284
LOC23687737	AAEL017317	Down	-0.0701467	0.0325126	0.0319936
LOC5572215	AAEL009630	Down	-0.0706712	0.0315403	0.0293941
LOC5567286	AAEL005946	Down	-0.0715927	0.0172503	0.0023917
LOC5569076	AAEL001216	Down	-0.0717445	0.0225925	0.00314793
LOC110674166	AAEL020485	Down	-0.0718908	0.0237904	0.00319936
LOC5576082	AAEL012312	Down	-0.0719475	0.0250465	0.00639872
LOC5571484	AAEL001605	Down	-0.07315	0.0322462	0.0273945
LOC5572640	AAEL001838	Down	-0.0738174	0.0320194	0.0185963
LOC5566228	AAEL005266	Down	-0.0751513	0.00622376	0.000401813
LOC5570887	AAEL018161	Down	-0.0753012	0.0226536	0.00193978
LOC5576237	AAEL018288	Down	-0.0759143	0.0304309	0.0131974
LOC5578058	AAEL013494	Down	-0.076237	0.0348255	0.0295941
LOC5563646	AAEL021083	Down	-0.0763479	0.00576563	0.000157054
LOC5564011	AAEL014272	Down	-0.0764958	0.0208137	0.0015676
LOC5577582	AAEL013287	Down	-0.0766331	0.0312743	0.0193961
LOC5580074	AAEL002178	Down	-0.0768294	0.0273133	0.00619876
LOC5572650	AAEL001865	Down	-0.0771335	0.0161208	0.00173514
LOC5576353	AAEL002881	Down	-0.0775049	0.00914162	2.63126e-05
LOC5574995	AAEL002523	Down	-0.0777974	0.0270626	0.00579884
LOC5578053	AAEL013490	Down	-0.0778027	0.0299306	0.010198
LOC5564860	AAEL004472	Down	-0.0790631	0.0249484	0.00299307
LOC5579800	AAEL003953	Down	-0.0793932	0.0319901	0.0113977
LOC5572193	AAEL009604	Down	-0.079717	0.0165468	0.001254
LOC5573963	AAEL010826	Down	-0.0814266	0.0169317	0.00177567
LOC5566610	AAEL027504	Down	-0.081713	0.0297055	0.00739852
LOC5577997	AAEL003385	Down	-0.0818641	0.0332781	0.014797
LOC5565754	AAEL014965	Down	-0.0820964	0.0272592	0.00355949
LOC5567581	AAEL006174	Down	-0.08243	0.0271562	0.00319936
LOC5572949	AAEL010171	Down	-0.0824922	0.0333269	0.0133973
LOC5570063	AAEL001354	Down	-0.0826796	0.0297918	0.00579884
LOC5564713	AAEL014583	Down	-0.0828556	0.00625787	0.000364847
LOC5568319	AAEL006727	Down	-0.0828799	0.0293238	0.00559888
LOC5573604	AAEL002108	Down	-0.0837427	0.0417265	0.0433913
LOC5568717	AAEL007043	Down	-0.0845197	0.0288387	0.00379924
LOC110678949	AAEL022104	Down	-0.0846573	0.0187977	0.000283397
LOC5568141	AAEL006582	Down	-0.0847887	0.0290838	0.00539892
LOC5570797	AAEL008588	Down	-0.0848369	0.0203321	0.000515181
LOC5575668	AAEL002687	Down	-0.0849971	0.0261664	0.00356281
LOC5567587	AAEL006186	Down	-0.0854398	0.0269297	0.00239952
LOC5565159	AAEL004613	Down	-0.0856518	0.0326528	0.00819836
LOC5567528	AAEL006129	Down	-0.0867292	0.0231361	0.00136114
LOC5573302	AAEL022867	Down	-0.0872798	0.0372053	0.0175965
LOC5573121	AAEL001974	Down	-0.0876965	0.0264598	0.00157953
LOC5567367	AAEL006025	Down	-0.0877253	0.0432472	0.0419916
LOC5576349	AAEL002867	Down	-0.0878043	0.0288414	0.00259948
LOC5567277	AAEL020992	Down	-0.0878052	0.0390386	0.0289942
LOC5574706	AAEL011347	Down	-0.0882011	0.0262645	0.00152456
LOC5575428	AAEL011832	Down	-0.0884486	0.0246434	0.00163627
LOC5566289	AAEL018120	Down	-0.08856	0.01884	0.000294716
LOC5573976	AAEL010814	Down	-0.0888114	0.0272664	0.00283297
LOC5565180	AAEL004603	Down	-0.0888367	0.0207016	0.000347419
LOC5564957	AAEL021728	Down	-0.0889034	0.0295008	0.00335011
LOC5564118	AAEL004118	Down	-0.0890295	0.0211243	0.000735797
LOC5574385	AAEL011090	Down	-0.0891852	0.0242272	0.000989698
LOC5572242	AAEL009671	Down	-0.0892793	0.044065	0.0457908
LOC5568078	AAEL006509	Down	-0.0898599	0.00972279	0.000645865
LOC5574929	AAEL011527	Down	-0.0901887	0.015797	0.00137567
LOC5567383	AAEL006061	Down	-0.0902297	0.0247551	0.0016764
LOC5570505	AAEL001411	Down	-0.0904945	0.0247468	0.0011208
LOC5578301	AAEL013620	Down	-0.0906598	0.0330372	0.0069986
LOC5579027	AAEL013966	Down	-0.0910465	0.023326	0.00112288
LOC5576010	AAEL012238	Down	-0.0911396	0.0198366	0.000207136
LOC5570989	AAEL008719	Down	-0.0912799	0.0273991	0.00274879
LOC5577765	AAEL003309	Down	-0.0915034	0.0171226	0.00168323
LOC5577406	AAEL003179	Down	-0.0915236	0.0370811	0.0171966
LOC5571188	AAEL008879	Down	-0.0919517	0.0195642	0.000595545
LOC5568807	AAEL001177	Down	-0.0931071	0.0305514	0.0029994
LOC5569632	AAEL007777	Down	-0.0935859	0.0153416	0.00128336
LOC5576121	AAEL002804	Down	-0.0938811	0.0418943	0.0265947
LOC5567424	AAEL006065	Down	-0.0939012	0.045388	0.0453909
LOC5579190	AAEL003899	Down	-0.0941584	0.018765	0.000131161
LOC5566868	AAEL000800	Down	-0.0942568	0.0327259	0.00379924
LOC5569644	AAEL007792	Down	-0.0944087	0.0398442	0.0215957
LOC5569014	AAEL007288	Down	-0.094435	0.0452075	0.0363927
LOC5579853	AAEL005845	Down	-0.09474	0.0246089	0.00125444
LOC5563827	AAEL014161	Down	-0.0956144	0.041999	0.0225955
LOC5569035	AAEL026700	Down	-0.095681	0.0367153	0.0111978
LOC5568076	AAEL006520	Down	-0.0958979	0.0241467	0.000980281
LOC5565261	AAEL020830	Down	-0.0960932	0.0478051	0.0421916
LOC5572116	AAEL009531	Down	-0.0963905	0.0447911	0.0315937
LOC5578794	AAEL003664	Down	-0.0964141	0.0298837	0.00253076
LOC23687484	AAEL017064	Down	-0.096508	0.0358316	0.00639872
LOC110680223	-	Down	-0.096514	0.0310045	0.00319936
LOC5578796	AAEL003675	Down	-0.0966875	0.0104765	6.81808e-05
LOC5571132	AAEL008832	Down	-0.0969154	0.0465594	0.0383923
LOC5565828	AAEL014999	Down	-0.097253	0.0477391	0.0477904
LOC5564916	AAEL014657	Down	-0.0973486	0.0308346	0.00259933
LOC5566238	AAEL005261	Down	-0.0974651	0.0478227	0.0415917
LOC5574683	AAEL011323	Down	-0.0978714	0.0277121	0.00516161
LOC5570546	AAEL008369	Down	-0.0978806	0.0456415	0.0367926
LOC5574870	AAEL011478	Down	-0.0980259	0.0170086	9.41805e-05
LOC5568087	AAEL006521	Down	-0.0987539	0.0434706	0.0229954
LOC5578234	AAEL013571	Down	-0.098811	0.015805	0.00101899
LOC5576673	AAEL026023	Down	-0.0990319	0.0279027	0.00175505
LOC5565097	AAEL004583	Down	-0.0996004	0.0448805	0.0263947
LOC5571797	AAEL020535	Down	-0.0996969	0.0486148	0.0445911
LOC5577364	AAEL000407	Down	-0.099915	0.0358409	0.0059988
LOC5574978	AAEL002510	Down	-0.100156	0.0285204	0.0023882
LOC5580268	AAEL027783	Down	-0.100242	0.0215365	0.000336901
LOC5563641	AAEL000050	Down	-0.100623	0.0500025	0.0433913
LOC5568471	AAEL006885	Down	-0.100819	0.00864704	0.000401131
LOC5573433	AAEL010486	Down	-0.100977	0.0317344	0.00317651
LOC5569124	AAEL007385	Down	-0.101376	0.00908233	5.47811e-06
LOC5575416	AAEL011813	Down	-0.101558	0.0427605	0.0177964
LOC5571140	AAEL008854	Down	-0.101649	0.0320732	0.00258149
LOC5565083	AAEL014717	Down	-0.10174	0.0315486	0.00223353
LOC5578361	AAEL003550	Down	-0.101809	0.0291999	0.00113188
LOC5573501	AAEL022033	Down	-0.102144	0.0264235	0.000488338
LOC5575432	AAEL011830	Down	-0.102626	0.0246596	0.000756246
LOC5566473	AAEL005414	Down	-0.102673	0.0238116	0.000610215
LOC5569497	AAEL007681	Down	-0.103155	0.0214874	0.000275592
LOC5577649	AAEL003267	Down	-0.103278	0.0434015	0.0189962
LOC5567073	AAEL005796	Down	-0.103367	0.0369568	0.0059988
LOC5568586	AAEL001101	Down	-0.104396	0.0270214	0.000358574
LOC5566353	AAEL005336	Down	-0.104454	0.0304088	0.00197123
LOC5565883	AAEL019474	Down	-0.104669	0.0388496	0.00719856
LOC5570245	AAEL023182	Down	-0.104861	0.0391834	0.00959808
LOC5564809	AAEL014630	Down	-0.104965	0.0247441	0.000977715
LOC5563717	AAEL003903	Down	-0.105034	0.0521257	0.0445911
LOC5564925	AAEL019568	Down	-0.105392	0.0108386	5.69342e-05
LOC5571015	AAEL008742	Down	-0.105734	0.0469581	0.0293941
LOC5568854	AAEL007151	Down	-0.105768	0.0342525	0.0029994
LOC5572427	AAEL001816	Down	-0.105852	0.0315337	0.00140332
LOC5578031	AAEL013466	Down	-0.106676	0.0354604	0.00359928
LOC5566316	AAEL005305	Down	-0.106909	0.0188483	0.000109458
LOC5578562	AAEL019589	Down	-0.107161	0.0435423	0.0165967
LOC5566232	AAEL005262	Down	-0.107211	0.034575	0.0029994
LOC5570159	AAEL008131	Down	-0.107305	0.0228316	0.000278999
LOC5571305	AAEL008958	Down	-0.107534	0.0385107	0.00619876
LOC5573437	AAEL010479	Down	-0.107653	0.0272051	0.000912783
LOC5568418	AAEL006847	Down	-0.107847	0.0467487	0.0237952
LOC5567118	AAEL015304	Down	-0.108154	0.0308113	0.00287267
LOC5573469	AAEL010513	Down	-0.109058	0.0395354	0.00619876
LOC5575829	AAEL012105	Down	-0.109655	0.0483747	0.0239952
LOC5570822	AAEL008610	Down	-0.109969	0.0214095	6.91263e-05
LOC5575647	AAEL011980	Down	-0.110127	0.0177976	0.00116205
LOC5575809	AAEL012083	Down	-0.110217	0.0531992	0.0431914
LOC5575971	AAEL012218	Down	-0.110277	0.0345201	0.00228853
LOC5570914	AAEL001479	Down	-0.110358	0.025289	0.000457878
LOC110677182	-	Down	-0.110615	0.00728476	5.10212e-06
LOC5566064	AAEL005149	Down	-0.110711	0.0391893	0.00459908
LOC5567651	AAEL006235	Down	-0.110794	0.0498561	0.0313937
LOC5565700	AAEL004930	Down	-0.110975	0.00968597	0.000407508
LOC5570826	AAEL008609	Down	-0.111083	0.0239091	0.000426858
LOC5571397	AAEL009029	Down	-0.111317	0.0353767	0.00266716
LOC5574741	AAEL011379	Down	-0.111814	0.0282068	0.000666486
LOC5576214	AAEL002827	Down	-0.112007	0.0144398	0.000716084
LOC5576483	AAEL002898	Down	-0.112053	0.0553946	0.0421916
LOC5569738	AAEL007868	Down	-0.112087	0.0128848	0.000751027
LOC5575082	AAEL011627	Down	-0.112127	0.0378998	0.00359928
LOC5568553	AAEL001109	Down	-0.112553	0.0308836	0.00181529
LOC5563984	AAEL004034	Down	-0.113027	0.0384223	0.00479904
LOC5574374	AAEL011106	Down	-0.11309	0.0518674	0.0293941
LOC5570204	AAEL008164	Down	-0.113436	0.0515623	0.024795
LOC5569863	AAEL007945	Down	-0.113514	0.0127127	0.000697069
LOC5574597	AAEL002418	Down	-0.113542	0.03601	0.00300934
LOC5578974	AAEL019746	Down	-0.11371	0.0433254	0.0111978
LOC5568648	AAEL007015	Down	-0.113953	0.040171	0.00359928
LOC5576003	AAEL025078	Down	-0.114052	0.0366043	0.00319936
LOC5568127	AAEL006550	Down	-0.114653	0.0360539	0.00298638
LOC5568481	AAEL006879	Down	-0.114947	0.017251	9.17525e-05
LOC5569674	AAEL007820	Down	-0.115114	0.0341745	0.00171363
LOC5577777	AAEL003285	Down	-0.115183	0.0142899	0.000330277
LOC110679302	AAEL027514	Down	-0.116044	0.0428035	0.00879824
LOC5573075	AAEL006299	Down	-0.116315	0.0549403	0.0393921
LOC5571237	AAEL008924	Down	-0.116352	0.0372878	0.0022707
LOC5567783	AAEL000115	Down	-0.116495	0.0590735	0.0479904
LOC5570913	AAEL001484	Down	-0.116547	0.0377944	0.0029994
LOC5577061	AAEL003103	Down	-0.116616	0.0164052	9.70253e-05
LOC5565441	AAEL000641	Down	-0.116809	0.0150073	0.000845376
LOC5567972	AAEL006415	Down	-0.116936	0.0517537	0.0245951
LOC5564545	AAEL004308	Down	-0.117338	0.0323535	0.00183764
LOC5575696	AAEL012010	Down	-0.117384	0.0156278	0.000792752
LOC5564975	AAEL004511	Down	-0.117487	0.0513873	0.0207958
LOC5573260	AAEL010359	Down	-0.11773	0.029089	0.00105289
LOC5576631	AAEL019597	Down	-0.117981	0.039813	0.00279944
LOC5575681	AAEL011992	Down	-0.118084	0.0143255	0.000758476
LOC5571703	AAEL009217	Down	-0.118491	0.0530233	0.0235953
LOC5577389	AAEL000468	Down	-0.118561	0.0475683	0.0135973
LOC5569804	AAEL024618	Down	-0.119136	0.041928	0.004999
LOC5565682	AAEL004938	Down	-0.119416	0.0446869	0.00959808
LOC5570205	AAEL008167	Down	-0.119492	0.0277567	0.000880507
LOC5577291	AAEL013144	Down	-0.119566	0.0159811	0.000876564
LOC5580325	AAEL013068	Down	-0.119642	0.0203764	0.000128988
LOC5567861	AAEL006317	Down	-0.119935	0.0460254	0.0117976
LOC5567167	AAEL005897	Down	-0.119956	0.0272216	0.000458899
LOC5577026	AAEL012950	Down	-0.119985	0.0225929	0.000245682
LOC110678610	AAEL020450	Down	-0.120699	0.0405965	0.00379924
LOC5564483	AAEL004277	Down	-0.12093	0.0577015	0.0335933
LOC23687632	AAEL017212	Down	-0.121282	0.0165029	0.000948555
LOC5572563	AAEL009879	Down	-0.121434	0.0599887	0.0425915
LOC5567647	AAEL027611	Down	-0.121802	0.0294193	0.00101479
LOC5567100	AAEL005830	Down	-0.121957	0.0369091	0.00468182
LOC5568205	AAEL006652	Down	-0.122171	0.0426337	0.0029994
LOC5572296	AAEL001767	Down	-0.122492	0.0137973	0.000468448
LOC5573313	AAEL010419	Down	-0.122853	0.049155	0.0141972
LOC5571447	AAEL009088	Down	-0.122893	0.0272046	0.000815383
LOC5572504	AAEL009833	Down	-0.122978	0.0504982	0.0165967
LOC5566521	AAEL005458	Down	-0.123663	0.0576754	0.0313937
LOC5575405	AAEL011810	Down	-0.123708	0.0380388	0.00189704
LOC5577486	AAEL013230	Down	-0.124183	0.0619695	0.0413917
LOC5570719	AAEL027494	Down	-0.124409	0.0433913	0.00619876
LOC5567339	AAEL006012	Down	-0.124803	0.0480896	0.0107978
LOC5578540	AAEL013746	Down	-0.124949	0.0647788	0.0493901
LOC5564726	AAEL004406	Down	-0.125219	0.0375588	0.00268873
LOC5569950	AAEL008039	Down	-0.125326	0.0112506	0.000489064
LOC5571298	AAEL001548	Down	-0.125651	0.0346659	0.00342154
LOC5573964	AAEL010819	Down	-0.126068	0.0115804	0.000474179
LOC5573712	AAEL010697	Down	-0.126079	0.0359065	0.00148209
LOC5567962	AAEL019461	Down	-0.126196	0.0345487	0.00134334
LOC5570792	AAEL008562	Down	-0.126478	0.0506337	0.0127974
LOC5568261	AAEL006693	Down	-0.126605	0.0361073	0.00144384
LOC5580262	AAEL018244	Down	-0.126893	0.0617445	0.0455909
LOC5565701	AAEL014944	Down	-0.126913	0.00829083	0.000272908
LOC5580111	AAEL010931	Down	-0.127007	0.0589807	0.0315937
LOC5577327	AAEL000410	Down	-0.12714	0.0209421	6.82501e-05
LOC5571409	AAEL009051	Down	-0.128806	0.0536311	0.0221956
LOC5567461	AAEL000970	Down	-0.129695	0.0538131	0.0163967
LOC5576862	AAEL012841	Down	-0.130105	0.065564	0.0479904
LOC5563849	AAEL014177	Down	-0.13012	0.0459922	0.00479904
LOC5579904	AAEL001020	Down	-0.130424	0.0505446	0.0107978
LOC5575338	AAEL002615	Down	-0.130715	0.0215884	0.000110096
LOC5568303	AAEL006751	Down	-0.131543	0.0299698	0.000643522
LOC23687536	AAEL017116	Down	-0.131576	0.0185278	0.000490595
LOC5572228	AAEL025268	Down	-0.131632	0.0420611	0.00306167
LOC5572519	AAEL009847	Down	-0.132004	0.0203749	0.000174688
LOC5580277	AAEL002983	Down	-0.132154	0.0645258	0.0409918
LOC5566654	AAEL005508	Down	-0.132572	0.0245356	0.000378075
LOC5576650	AAEL012684	Down	-0.133008	0.0121858	0.000489318
LOC5573938	AAEL002198	Down	-0.133099	0.0344519	0.000816728
LOC5575721	AAEL012029	Down	-0.133235	0.0343249	0.00130397
LOC5573231	AAEL010312	Down	-0.133376	0.0553748	0.014997
LOC5571162	AAEL008874	Down	-0.133872	0.0505743	0.00879824
LOC5577433	AAEL019845	Down	-0.134061	0.015639	0.000717601
LOC5569119	AAEL007382	Down	-0.134111	0.0375792	0.00121838
LOC5570597	AAEL008412	Down	-0.134175	0.0648059	0.039792
LOC5571525	AAEL019495	Down	-0.134248	0.0484835	0.00759848
LOC5576142	AAEL012337	Down	-0.134468	0.0330801	0.00190658
LOC5574404	AAEL011116	Down	-0.134519	0.0147093	0.000220086
LOC5571200	AAEL008899	Down	-0.134673	0.0524141	0.0119976
LOC5567945	AAEL006386	Down	-0.134748	0.048078	0.00539892
LOC5568927	AAEL007234	Down	-0.134971	0.063947	0.0413917
LOC110676996	AAEL025355	Down	-0.134975	0.0556078	0.0141972
LOC5566304	AAEL022240	Down	-0.135026	0.0653147	0.0407918
LOC5565841	AAEL005043	Down	-0.135107	0.0507639	0.0069986
LOC5578123	AAEL003427	Down	-0.13539	0.00560813	0.000108081
LOC5568472	AAEL006895	Down	-0.135512	0.0367347	0.00275174
LOC5572207	AAEL022010	Down	-0.136571	0.040141	0.0022497
LOC23687393	AAEL016973	Down	-0.137239	0.0413905	0.00600458
LOC5569767	AAEL007893	Down	-0.137605	0.0320751	0.000640501
LOC5570314	AAEL008250	Down	-0.137625	0.0532817	0.00959808
LOC5576001	AAEL012243	Down	-0.137662	0.0384346	0.00335291
LOC5572782	AAEL010047	Down	-0.138125	0.0415417	0.00280803
LOC5576594	AAEL002924	Down	-0.13813	0.0492117	0.00379924
LOC5564249	AAEL004195	Down	-0.138357	0.0268957	0.000214844
LOC5575533	AAEL011912	Down	-0.138363	0.0472957	0.00579884
LOC5570114	AAEL008079	Down	-0.138487	0.0127201	0.0003862
LOC5573557	AAEL022931	Down	-0.138686	0.0432078	0.00315718
LOC5577630	AAEL003234	Down	-0.138694	0.00940296	0.000321329
LOC5578387	AAEL011728	Down	-0.138861	0.0616094	0.029794
LOC5576745	AAEL012731	Down	-0.139142	0.0204158	0.000163861
LOC5568570	AAEL001141	Down	-0.139319	0.0499683	0.00759848
LOC5565121	AAEL014732	Down	-0.139844	0.045085	0.00279944
LOC5572730	AAEL010004	Down	-0.140054	0.0350992	0.000595399
LOC5568708	AAEL007054	Down	-0.140233	0.0147531	0.000580043
LOC5570016	AAEL000193	Down	-0.140303	0.0696672	0.040192
LOC5568174	AAEL006630	Down	-0.14044	0.0539268	0.009998
LOC5573464	AAEL010508	Down	-0.14114	0.0441949	0.00351708
LOC5573830	AAEL010754	Down	-0.141898	0.00865432	0.0002009
LOC5576612	AAEL012636	Down	-0.142021	0.0526037	0.00919816
LOC5573060	AAEL010244	Down	-0.142187	0.0268735	0.00186261
LOC5569515	AAEL007710	Down	-0.142365	0.0520592	0.00639872
LOC5572666	AAEL001845	Down	-0.142726	0.0480108	0.00239952
LOC5578753	AAEL003678	Down	-0.14279	0.0528882	0.00959808
LOC5568880	AAEL007184	Down	-0.142895	0.0267346	0.000287041
LOC5573394	AAEL028141	Down	-0.142941	0.0247626	0.000257334
LOC5563701	AAEL019406	Down	-0.142945	0.0455923	0.00291687
LOC5570147	AAEL008128	Down	-0.143012	0.0209021	0.000161826
LOC5564179	AAEL004141	Down	-0.14315	0.03296	0.00180598
LOC5569212	AAEL019885	Down	-0.143648	0.0443385	0.00394977
LOC5565230	AAEL004653	Down	-0.1437	0.0239018	3.63168e-05
LOC5565756	AAEL004997	Down	-0.14385	0.0350492	0.0018749
LOC5575675	AAEL011988	Down	-0.143898	0.0578249	0.0141972
LOC5579897	AAEL001048	Down	-0.144119	0.0625999	0.0261948
LOC5570313	AAEL008248	Down	-0.14423	0.0205042	0.00018474
LOC5569078	AAEL001206	Down	-0.144469	0.0274603	0.000514021
LOC5574089	AAEL002272	Down	-0.144549	0.0479338	0.00326759
LOC5580273	AAEL003009	Down	-0.144578	0.0375534	0.00122327
LOC5579887	AAEL001024	Down	-0.144621	0.0688999	0.035193
LOC5579146	AAEL014022	Down	-0.144638	0.0296244	0.000141283
LOC5570813		Down	-0.144644	0.0725147	0.0445911
LOC5573804	AAEL010727	Down	-0.144878	0.0379127	0.00105819
LOC5574816	AAEL002464	Down	-0.144978	0.0135187	0.000436677
LOC5566564	AAEL005492	Down	-0.145131	0.0589058	0.0119976
LOC5577113	AAEL008697	Down	-0.145304	0.00959689	4.00613e-07
LOC5577366	AAEL000418	Down	-0.145314	0.0515918	0.004999
LOC23687627	AAEL021288	Down	-0.145338	0.0456903	0.00270414
LOC5577910	AAEL003352	Down	-0.145628	0.022574	0.000108188
LOC5568845	AAEL007153	Down	-0.145754	0.0497262	0.0039992
LOC5566038	AAEL015052	Down	-0.145786	0.0705158	0.035193
LOC5577407	AAEL003161	Down	-0.145857	0.0222301	4.56561e-05
LOC5569502	AAEL007679	Down	-0.146655	0.0328107	0.000541547
LOC110677031	AAEL027249	Down	-0.146718	0.0460305	0.00262485
LOC110678856	AAEL027968	Down	-0.146788	0.0449014	0.00287637
LOC5570175	AAEL014154	Down	-0.146835	0.0515377	0.00439912
LOC5563713	AAEL003916	Down	-0.146879	0.0565428	0.0103979
LOC5566777	AAEL024210	Down	-0.14695	0.0570152	0.0127974
LOC5574668	AAEL023822	Down	-0.147059	0.0495523	0.00259948
LOC5573995	AAEL015118	Down	-0.147514	0.0596143	0.00979804
LOC5571173	AAEL008871	Down	-0.147541	0.0163342	0.00053771
LOC5577132	AAEL023019	Down	-0.148098	0.0395522	0.0014241
LOC5571415	AAEL009043	Down	-0.148212	0.0454476	0.00203681
LOC5573529	AAEL010565	Down	-0.148264	0.0555678	0.00619876
LOC5573732	AAEL000291	Down	-0.148407	0.0110765	0.000290923
LOC5571927	AAEL020290	Down	-0.14848	0.00718646	2.34243e-06
LOC5576266	AAEL012419	Down	-0.148725	0.0375438	0.000553225
LOC5577016	AAEL023242	Down	-0.148872	0.0481027	0.00309221
LOC5566589	AAEL019580	Down	-0.148912	0.0571715	0.00919816
LOC110678484	AAEL025246	Down	-0.148939	0.0417426	0.00142994
LOC5570733	AAEL008507	Down	-0.149037	0.0620433	0.0187962
LOC5576894	AAEL003046	Down	-0.149037	0.0197259	2.85685e-05
LOC5566925	AAEL005694	Down	-0.1492	0.051049	0.00279944
LOC5577458	AAEL013207	Down	-0.149207	0.0258654	0.000197942
LOC5578271	AAEL003491	Down	-0.149253	0.0396579	0.00291927
LOC5567835	AAEL000983	Down	-0.149331	0.0477773	0.00274725
LOC5570670	AAEL008490	Down	-0.149475	0.016386	0.000583148
LOC5566531	AAEL027240	Down	-0.149667	0.0679417	0.0279944
LOC5570952	AAEL008680	Down	-0.149762	0.0493977	0.00279944
LOC5564024	AAEL014282	Down	-0.14995	0.0668436	0.0231954
LOC5567698	AAEL006264	Down	-0.150109	0.032269	0.000337395
LOC5564584	AAEL004338	Down	-0.150584	0.0225107	0.000172862
LOC5569988	AAEL008064	Down	-0.150757	0.0268819	0.00020652
LOC23687935	AAEL017515	Down	-0.15081	0.0557781	0.00839832
LOC5563919	AAEL001277	Down	-0.150831	0.0415766	0.00122741
LOC5572011	AAEL021276	Down	-0.151062	0.0277424	0.000271432
LOC5564109	AAEL004096	Down	-0.151296	0.0554528	0.00759848
LOC5573556	AAEL027408	Down	-0.151315	0.0264656	0.000158206
LOC5572191	AAEL009607	Down	-0.151768	0.0305407	7.67854e-05
LOC5575280	AAEL011745	Down	-0.15194	0.0717002	0.0391922
LOC5568702	AAEL007055	Down	-0.152008	0.0275075	0.000277266
LOC5569073	AAEL001201	Down	-0.152082	0.0643082	0.019996
LOC5566935	AAEL005709	Down	-0.152762	0.0456778	0.0047938
LOC110678870	AAEL025813	Down	-0.152809	0.0609658	0.010198
LOC5572543	AAEL024410	Down	-0.152937	0.0658099	0.0209958
LOC5576107	AAEL002813	Down	-0.152947	0.0108621	0.000343603
LOC5573452	AAEL010496	Down	-0.153078	0.0493443	0.00239952
LOC5576100	AAEL002789	Down	-0.153124	0.0345502	0.000756248
LOC5568618	AAEL006977	Down	-0.153309	0.0268308	0.000224394
LOC5566074	AAEL015061	Down	-0.154218	0.0353953	0.000418716
LOC5572071	AAEL001715	Down	-0.154372	0.0215465	5.86086e-05
LOC5574747	AAEL019990	Down	-0.154376	0.0358604	0.00155874
LOC23687722	AAEL017302	Down	-0.154431	0.0317878	0.000203155
LOC5565534	AAEL019740	Down	-0.154481	0.0646608	0.0189962
LOC5569673	AAEL007821	Down	-0.154519	0.0393293	0.00122754
LOC5580260	AAEL012586	Down	-0.154805	0.0475953	0.0051291
LOC5578745	AAEL019555	Down	-0.154838	0.0538773	0.004999
LOC5577723	AAEL013359	Down	-0.154951	0.00782906	9.465e-07
LOC5573872	AAEL010787	Down	-0.155408	0.00897483	2.1253e-06
LOC5574282	AAEL011055	Down	-0.15569	0.0333322	0.000613639
LOC5567447	AAEL006095	Down	-0.155711	0.0251921	0.00087632
LOC5564225	AAEL023037	Down	-0.15572	0.0315711	0.000587376
LOC5568081	AAEL006516	Down	-0.156133	0.0251518	0.000142203
LOC5570127	AAEL008107	Down	-0.156141	0.0595718	0.0107978
LOC5568998	AAEL025594	Down	-0.156331	0.0355768	0.000335262
LOC5576996	AAEL003056	Down	-0.156755	0.016365	0.000414079
LOC5573443	AAEL010491	Down	-0.157013	0.0445863	0.00203695
LOC5565018	AAEL014697	Down	-0.15712	0.0663161	0.0187962
LOC5569392	AAEL020446	Down	-0.157271	0.0751195	0.0353929
LOC5569526	AAEL007696	Down	-0.157394	0.054184	0.00539892
LOC5567491	AAEL000951	Down	-0.15787	0.00773189	0.000111544
LOC5569750	AAEL007915	Down	-0.157995	0.0191477	1.98458e-05
LOC5570234	AAEL008179	Down	-0.158123	0.0404949	0.000895268
LOC5579206	AAEL019700	Down	-0.158478	0.0346282	0.00187907
LOC5574383	AAEL011102	Down	-0.15851	0.0195273	1.6901e-05
LOC5566691	AAEL027606	Down	-0.158601	0.0727176	0.0369926
LOC5565962	AAEL005220	Down	-0.158851	0.00699707	0.000130506
LOC5576935	AAEL019420	Down	-0.15909	0.069032	0.0227954
LOC5567614	AAEL006189	Down	-0.159201	0.063091	0.0107978
LOC5564767	AAEL004448	Down	-0.159385	0.0383404	0.000759146
LOC5572378	AAEL009766	Down	-0.159389	0.0679669	0.0219956
LOC5576268	AAEL012427	Down	-0.159427	0.0430914	0.00374917
LOC5578148	AAEL013541	Down	-0.159631	0.0569169	0.00759848
LOC5571466	AAEL009101	Down	-0.159716	0.014023	0.000347589
LOC5569180	AAEL007444	Down	-0.159836	0.00984135	0.000239466
LOC5572468	AAEL001833	Down	-0.159847	0.0681737	0.0223955
LOC5573116	AAEL002031	Down	-0.160025	0.0311974	0.00113536
LOC5569749	AAEL007874	Down	-0.160617	0.03596	0.00178963
LOC5580042	AAEL021307	Down	-0.160918	0.053169	0.0029994
LOC5570316	AAEL008253	Down	-0.161014	0.0621871	0.00919816
LOC5577439	AAEL019824	Down	-0.161171	0.0690869	0.0225955
LOC5565030	AAEL026380	Down	-0.161622	0.0507227	0.00272386
LOC5567207	AAEL000902	Down	-0.161956	0.0301042	0.000201164
LOC5576493	AAEL019843	Down	-0.162144	0.0363155	0.00197214
LOC5579219	AAEL014057	Down	-0.162401	0.0654609	0.0159968
LOC5565050	AAEL004546	Down	-0.16243	0.0355644	0.00173369
LOC5566087	AAEL005165	Down	-0.162902	0.0105862	1.38563e-05
LOC5578827	AAEL013869	Down	-0.162961	0.0526075	0.00315205
LOC5575777	AAEL002701	Down	-0.162986	0.0462	0.00163195
LOC5569279	AAEL007521	Down	-0.163573	0.0497978	0.00588356
LOC5565346	AAEL014836	Down	-0.163827	0.054539	0.00374201
LOC5565224	AAEL004668	Down	-0.163874	0.0364364	0.000300078
LOC5568808	AAEL001166	Down	-0.163991	0.0599031	0.00559888
LOC5566520	AAEL005457	Down	-0.165029	0.0231424	7.09181e-05
LOC5579514	AAEL015100	Down	-0.165074	0.0326414	0.000241238
LOC5578223	AAEL024700	Down	-0.165137	0.0540314	0.00319936
LOC5573623	AAEL010602	Down	-0.165202	0.0419056	0.000837188
LOC110676030	AAEL024500	Down	-0.165405	0.0325955	0.000272948
LOC5566724	AAEL005605	Down	-0.165625	0.0465391	0.00154612
LOC5570614	AAEL008431	Down	-0.165687	0.0415678	0.000834675
LOC5569672	AAEL007822	Down	-0.16569	0.0393513	0.000553428
LOC5576737	AAEL002978	Down	-0.165691	0.0275078	0.000115923
LOC5576325	AAEL027096	Down	-0.165768	0.0486397	0.00411324
LOC5576915	AAEL012866	Down	-0.165773	0.0379107	0.000582446
LOC5572038	AAEL000248	Down	-0.165958	0.0597696	0.00679864
LOC5568764	AAEL010704	Down	-0.16601	0.024778	1.40502e-05
LOC5579796	AAEL003976	Down	-0.166048	0.0331764	0.000487709
LOC5574140	AAEL010949	Down	-0.166184	0.0529809	0.00300771
LOC5578574	AAEL013761	Down	-0.166339	0.0500929	0.00238124
LOC5579012	AAEL003774	Down	-0.166411	0.0291676	0.000200317
LOC5574358	AAEL002358	Down	-0.166623	0.0509642	0.0024338
LOC5565399	AAEL004779	Down	-0.16673	0.073565	0.0281944
LOC5570019	AAEL000180	Down	-0.166878	0.0393849	0.000637797
LOC5573797	AAEL024508	Down	-0.167111	0.0604414	0.00539892
LOC5580055	AAEL022806	Down	-0.167196	0.0470486	0.00155299
LOC5568342	AAEL001065	Down	-0.167246	0.0440718	0.00106152
LOC5570089	AAEL001341	Down	-0.167424	0.0582356	0.00379924
LOC5576344	AAEL002859	Down	-0.1677	0.0247536	0.00012074
LOC110676550	AAEL027436	Down	-0.167851	0.0459011	0.0011641
LOC5567254	AAEL025460	Down	-0.167856	0.0690091	0.0179964
LOC5576486	AAEL002913	Down	-0.167858	0.0389801	0.000481404
LOC5570509	AAEL001432	Down	-0.168073	0.020349	8.77378e-05
LOC5564923	AAEL004496	Down	-0.16831	0.0394186	0.0005946
LOC5565279	AAEL014799	Down	-0.168443	0.0478311	0.00384538
LOC5578550	AAEL003573	Down	-0.168577	0.0666881	0.0121976
LOC110677774	AAEL024413	Down	-0.168596	0.0555033	0.0029994
LOC5579966	AAEL007586	Down	-0.168775	0.0554469	0.0029994
LOC5568465	AAEL006860	Down	-0.169027	0.00701545	8.30367e-07
LOC5571897	AAEL009373	Down	-0.169288	0.0516457	0.00547691
LOC5577545	AAEL013249	Down	-0.169387	0.0300566	0.000244309
LOC5574245	AAEL011019	Down	-0.169393	0.0404446	0.000826952
LOC5571884	AAEL009362	Down	-0.169416	0.0554243	0.00259948
LOC5566901	AAEL000854	Down	-0.169483	0.034266	0.000308152
LOC5573465	AAEL010504	Down	-0.169749	0.0686601	0.0139972
LOC5571387	AAEL009026	Down	-0.169795	0.0222917	5.13144e-05
LOC5572646	AAEL001847	Down	-0.169843	0.0406358	0.000438239
LOC5568690	AAEL007065	Down	-0.169917	0.0137686	0.000442369
LOC5569310	AAEL007549	Down	-0.170397	0.0132593	0.000268441
LOC5575522	AAEL011898	Down	-0.17042	0.0318471	0.000291392
LOC5571571	AAEL009160	Down	-0.170473	0.0157226	0.000269071
LOC5567874	AAEL006330	Down	-0.170719	0.0701745	0.0177964
LOC5571785	AAEL009313	Down	-0.170865	0.0111691	0.000255744
LOC5577919	AAEL003344	Down	-0.171063	0.0376054	0.00065236
LOC5565444	AAEL023786	Down	-0.171109	0.0774227	0.0263947
LOC5576294	AAEL012437	Down	-0.171331	0.0564329	0.00239952
LOC5575152	AAEL029004	Down	-0.171337	0.0290785	0.000200907
LOC5579878	AAEL001041	Down	-0.171379	0.0408676	0.000736332
LOC5577908	AAEL003347	Down	-0.171417	0.0625227	0.00739852
LOC5574834	AAEL011433	Down	-0.171669	0.0352206	0.00149628
LOC5578440	AAEL000510	Down	-0.171924	0.0591125	0.00421937
LOC5574704	AAEL011340	Down	-0.172004	0.0484363	0.00146673
LOC5572936	AAEL010151	Down	-0.172099	0.0443525	0.000722279
LOC5578310	AAEL013627	Down	-0.172123	0.0733351	0.0181964
LOC5579109	AAEL003829	Down	-0.172163	0.0429369	0.000597012
LOC5574000	AAEL010844	Down	-0.172227	0.0510308	0.0014897
LOC5579176	AAEL019783	Down	-0.172461	0.047201	0.00130189
LOC5567300	AAEL005955	Down	-0.172517	0.0594276	0.00459908
LOC5570581	AAEL008393	Down	-0.172687	0.0598368	0.00439912
LOC5569001	AAEL007284	Down	-0.172892	0.0705439	0.0157968
LOC5577687	AAEL013320	Down	-0.173024	0.0238531	7.9839e-05
LOC5571588	AAEL009178	Down	-0.173088	0.0584436	0.00259948
LOC5566444	AAEL019556	Down	-0.173485	0.0720399	0.0161968
LOC5569985	AAEL008058	Down	-0.17351	0.0502157	0.00147311
LOC5564363	AAEL021301	Down	-0.17355	0.053803	0.00300537
LOC5571696	AAEL009220	Down	-0.173723	0.0648483	0.0069986
LOC5566137	AAEL005190	Down	-0.174276	0.0236943	8.66683e-05
LOC5576477	AAEL002887	Down	-0.174308	0.0376968	0.000546541
LOC5572625	AAEL025223	Down	-0.17455	0.0729198	0.0217956
LOC5565307	AAEL004716	Down	-0.174795	0.0387081	0.000378101
LOC5577203	AAEL013102	Down	-0.174951	0.0401333	0.000271622
LOC5579990	AAEL001742	Down	-0.174979	0.0499007	0.00280634
LOC5567987	AAEL006450	Down	-0.175384	0.0525946	0.00209985
LOC5568047	AAEL006486	Down	-0.175746	0.0535053	0.00292249
LOC5572870	AAEL010090	Down	-0.176171	0.0520991	0.00182864
LOC23687928	AAEL017508	Down	-0.176347	0.0401928	0.000309838
LOC5573374	AAEL010464	Down	-0.176356	0.0141497	0.0004057
LOC5573069	AAEL010256	Down	-0.176376	0.0508088	0.00223612
LOC5575242	AAEL011711	Down	-0.17662	0.0130479	0.000175527
LOC5575243	AAEL011703	Down	-0.176803	0.0697142	0.0115977
LOC5567531	AAEL027977	Down	-0.176999	0.0304356	0.000146809
LOC5577035	AAEL012943	Down	-0.177287	0.0407527	0.000410607
LOC5571766	AAEL009285	Down	-0.177554	0.0607447	0.00379924
LOC5565474	AAEL002495	Down	-0.177557	0.0131408	0.000332767
LOC5563914	AAEL003995	Down	-0.177697	0.0549043	0.00285928
LOC5578089	AAEL003434	Down	-0.178126	0.0215249	0.000124279
LOC5570138	AAEL008100	Down	-0.178439	0.0704559	0.0111978
LOC5573818	AAEL010738	Down	-0.178513	0.0257886	9.05699e-05
LOC5578265	AAEL003493	Down	-0.178812	0.042056	0.000164535
LOC5567784	AAEL000149	Down	-0.178994	0.0714029	0.0135973
LOC5574590	AAEL002416	Down	-0.179064	0.0289993	4.21017e-05
LOC5575813	AAEL012069	Down	-0.179342	0.0199221	3.11993e-06
LOC5564976	AAEL004532	Down	-0.179404	0.0297878	0.000159091
LOC5578144	AAEL013521	Down	-0.179479	0.0369827	0.000409062
LOC5578822	AAEL013863	Down	-0.179521	0.06268	0.00459908
LOC5565195	AAEL024179	Down	-0.179619	0.0559	0.00310291
LOC5575702	AAEL012016	Down	-0.179648	0.0324102	0.000858024
LOC5580100	AAEL002140	Down	-0.179697	0.0219828	7.69396e-05
LOC5571939	AAEL009420	Down	-0.179807	0.0377587	0.000272571
LOC5578960	AAEL013939	Down	-0.180045	0.0416839	0.000517294
LOC5570233	AAEL008166	Down	-0.180267	0.013605	0.000198363
LOC5579456	AAEL019656	Down	-0.180424	0.0401594	0.000522175
LOC5570237	AAEL008171	Down	-0.180584	0.0380444	0.000283135
LOC5568817	AAEL001187	Down	-0.180661	0.0593285	0.00399333
LOC5576111	AAEL002784	Down	-0.180902	0.0558699	0.00344908
LOC5570798	AAEL019486	Down	-0.181018	0.0639566	0.004999
LOC5564379	AAEL014414	Down	-0.181073	0.0407034	0.00034313
LOC110679365	AAEL020525	Down	-0.18112	0.0352573	0.00034092
LOC5576217	AAEL029007	Down	-0.181538	0.0282771	4.77966e-05
LOC5573375	AAEL010473	Down	-0.181545	0.0555986	0.00256603
LOC5577073	AAEL019939	Down	-0.181836	0.0363345	0.000149186
LOC5564392	AAEL004234	Down	-0.181975	0.020209	6.42019e-05
LOC5563955	AAEL004040	Down	-0.181986	0.0544793	0.00204542
LOC5566532	AAEL015202	Down	-0.182147	0.0262964	0.00123644
LOC5575983	AAEL012233	Down	-0.182226	0.0195458	0.000304258
LOC5564581	AAEL004347	Down	-0.182526	0.0237342	2.0727e-05
LOC5572323	AAEL009706	Down	-0.182607	0.0334307	8.51228e-05
LOC5572484	AAEL019518	Down	-0.182745	0.05372	0.00235836
LOC5568072	AAEL006514	Down	-0.182767	0.03045	6.2214e-05
LOC110676785	AAEL020401	Down	-0.182816	0.0735225	0.0159968
LOC5570869	AAEL008645	Down	-0.183166	0.0472034	0.000536711
LOC5576360	AAEL002860	Down	-0.183175	0.0231718	0.000870082
LOC5567506	AAEL006113	Down	-0.183238	0.0576213	0.00239952
LOC5576045	AAEL012272	Down	-0.183861	0.0320341	0.000211733
LOC5574392	AAEL011101	Down	-0.183872	0.0671804	0.00539892
LOC5566585	AAEL000759	Down	-0.18407	0.0293267	7.74836e-05
LOC5566784	AAEL015255	Down	-0.184182	0.0646383	0.00339932
LOC5568150	AAEL006577	Down	-0.184327	0.0323413	0.000103798
LOC5575475	AAEL021703	Down	-0.184989	0.0275261	0.00011872
LOC5580010	AAEL009637	Down	-0.185113	0.0152499	0.000435638
LOC5569564	AAEL025134	Down	-0.185402	0.0245321	1.92228e-05
LOC5564636	AAEL004378	Down	-0.185452	0.0142892	0.000355775
LOC5579046	AAEL013979	Down	-0.185507	0.0578872	0.00361113
LOC5574178	AAEL019806	Down	-0.185712	0.0209688	6.67117e-05
LOC5579491	AAEL015275	Down	-0.185979	0.0644621	0.0039992
LOC5574420	AAEL019780	Down	-0.18601	0.040807	0.000575431
LOC5564151	AAEL024849	Down	-0.186028	0.0518503	0.00102751
LOC5572780	AAEL010051	Down	-0.186031	0.0499409	0.000958043
LOC5568696	AAEL007050	Down	-0.186108	0.0236915	0.000110488
LOC5571437	AAEL009070	Down	-0.186201	0.0360773	0.00127938
LOC5568784	AAEL007135	Down	-0.186318	0.0187467	2.02392e-05
LOC5565878	AAEL000679	Down	-0.186572	0.0200499	9.65969e-06
LOC5568890	AAEL007197	Down	-0.186699	0.0616646	0.00359928
LOC110674801	AAEL022060	Down	-0.187026	0.0657034	0.00559888
LOC5565783	AAEL004985	Down	-0.187107	0.038176	0.000278771
LOC5570118	AAEL008096	Down	-0.187502	0.040485	0.00199519
LOC5565389	AAEL004777	Down	-0.187619	0.0308876	0.000477987
LOC5579809	AAEL005528	Down	-0.187795	0.0564358	0.00179586
LOC5571584	AAEL009169	Down	-0.187995	0.0400524	0.000350353
LOC5577499	AAEL003193	Down	-0.188027	0.02235	1.8574e-05
LOC5576572	AAEL025570	Down	-0.188185	0.0224972	7.68939e-05
LOC5576054	AAEL013952	Down	-0.188185	0.0197118	7.80195e-06
LOC5575304	AAEL019566	Down	-0.188219	0.0611139	0.00319936
LOC5569093	AAEL007354	Down	-0.1884	0.0469882	0.00094681
LOC5568035	AAEL006476	Down	-0.188509	0.0479011	0.00102397
LOC5569161	AAEL020689	Down	-0.188513	0.0661794	0.00519896
LOC5575781	AAEL002703	Down	-0.188706	0.0320048	0.000156557
LOC5566385	AAEL019833	Down	-0.188991	0.0392858	0.000305026
LOC5580034	AAEL010227	Down	-0.189077	0.0362743	0.000130146
LOC5574515	AAEL019717	Down	-0.189228	0.00786615	1.44844e-07
LOC5576029	AAEL012262	Down	-0.189441	0.0243638	0.000766121
LOC5575103	AAEL011657	Down	-0.189794	0.025766	4.83856e-05
LOC5567161	AAEL005900	Down	-0.190058	0.0260655	9.19606e-05
LOC5567648	AAEL006231	Down	-0.190086	0.0674572	0.00379924
LOC5567067	AAEL005822	Down	-0.19035	0.0364929	0.000248566
LOC110676515	AAEL023511	Down	-0.190357	0.0537626	0.00200858
LOC5580117	AAEL022296	Down	-0.190497	0.0496908	0.00102285
LOC5566900	AAEL000824	Down	-0.190551	0.0628705	0.00239952
LOC5573343	AAEL010432	Down	-0.190902	0.0747811	0.00979804
LOC5576154	AAEL012347	Down	-0.191031	0.0710402	0.00959808
LOC5575182	AAEL019826	Down	-0.191659	0.0474921	0.000659597
LOC5580226	AAEL012212	Down	-0.191691	0.0665292	0.00379924
LOC5563911	AAEL003990	Down	-0.191735	0.0570172	0.00153383
LOC5574141	AAEL010955	Down	-0.192056	0.0434181	0.00079664
LOC5568748	AAEL007084	Down	-0.192212	0.0415034	0.000280259
LOC5576223	AAEL002825	Down	-0.19228	0.0161405	6.24554e-06
LOC5566793	AAEL026243	Down	-0.192283	0.032709	0.000116552
LOC5572082	AAEL009510	Down	-0.192458	0.0214347	4.97336e-05
LOC5575275	AAEL011737	Down	-0.19252	0.0724355	0.0079984
LOC5576046	AAEL014932	Down	-0.192901	0.00954984	1.83195e-06
LOC5574410	AAEL011113	Down	-0.192933	0.0507307	0.00130466
LOC110681159	AAEL021894	Down	-0.193344	0.0412517	0.000195882
LOC5565863	AAEL012914	Down	-0.193363	0.0648036	0.00359928
LOC5566185	AAEL007936	Down	-0.193443	0.0571074	0.00224118
LOC5568811	AAEL001152	Down	-0.193736	0.0708646	0.0059988
LOC5568056	AAEL018051	Down	-0.194058	0.0724633	0.00759848
LOC5568726	AAEL007078	Down	-0.194371	0.0358668	4.11131e-05
LOC5565408	AAEL014846	Down	-0.194595	0.0625413	0.00282533
LOC5572383	AAEL009772	Down	-0.194655	0.024599	0.000713006
LOC5564110	AAEL004107	Down	-0.194768	0.0554248	0.00213704
LOC5565765	AAEL004973	Down	-0.194846	0.024927	0.000159829
LOC5569016	AAEL007286	Down	-0.194861	0.0271953	5.63467e-05
LOC5575775	AAEL002700	Down	-0.194949	0.0461588	0.000714092
LOC5566678	AAEL005544	Down	-0.195366	0.040819	0.000410125
LOC5578022	AAEL003373	Down	-0.196016	0.0448138	0.000565434
LOC5574976	AAEL002501	Down	-0.196024	0.025797	0.000116581
LOC5576744	AAEL024536	Down	-0.196138	0.00585786	5.20305e-05
LOC5567494	AAEL000941	Down	-0.196493	0.0145913	0.000210354
LOC5567933	AAEL006373	Down	-0.196697	0.0672491	0.0029994
LOC5570082	AAEL008410	Down	-0.196709	0.066568	0.00319936
LOC5569143	AAEL007403	Down	-0.196897	0.0255519	0.000129456
LOC5574701	AAEL027910	Down	-0.196936	0.028423	0.000233132
LOC5572947	AAEL010170	Down	-0.197164	0.0356944	0.000172541
LOC5575800	AAEL012078	Down	-0.197205	0.0225399	2.19954e-05
LOC5567421	AAEL006087	Down	-0.197422	0.0616498	0.00250689
LOC110678734	AAEL019403	Down	-0.197894	0.00744948	1.56329e-07
LOC5569338	AAEL007546	Down	-0.197946	0.0206734	6.26319e-05
LOC5573044	AAEL010217	Down	-0.198018	0.0657753	0.00327728
LOC110678105	AAEL027735	Down	-0.198188	0.0779801	0.0111978
LOC5567537	AAEL006124	Down	-0.198188	0.0581106	0.00148602
LOC5569553	AAEL007758	Down	-0.198237	0.0249599	2.63868e-05
LOC5571228	AAEL008931	Down	-0.198449	0.0294767	3.8642e-05
LOC5569340	AAEL007548	Down	-0.198728	0.0404127	0.000372334
LOC5578893	AAEL013898	Down	-0.199125	0.045611	0.000909356
LOC5573392	AAEL002065	Down	-0.199177	0.0541949	0.00102053
LOC5571539	AAEL009125	Down	-0.199393	0.0434005	0.000331694
LOC110675810	AAEL009183	Down	-0.199443	0.0321731	6.12997e-05
LOC110679174	AAEL025704	Down	-0.199549	0.0504379	0.00310233
LOC5579020	AAEL013959	Down	-0.199594	0.0698252	0.00479904
LOC5566799	AAEL005662	Down	-0.199912	0.0347302	0.00105566
LOC5578082	AAEL003423	Down	-0.200026	0.0139228	0.000245384
LOC5577272	AAEL013121	Down	-0.200145	0.0393971	0.00057254
LOC5564065	AAEL004081	Down	-0.200206	0.0322875	9.27583e-05
LOC5570947	AAEL008679	Down	-0.200232	0.0352984	0.000192637
LOC5574100	AAEL002271	Down	-0.200343	0.0612658	0.00208084
LOC5566513	AAEL005446	Down	-0.20038	0.0699519	0.00379924
LOC5566638	AAEL005504	Down	-0.200471	0.0631372	0.00224838
LOC5568867	AAEL007187	Down	-0.200493	0.0616131	0.00213778
LOC5576864	AAEL012845	Down	-0.200537	0.0446321	0.000372313
LOC5574204	AAEL002295	Down	-0.200562	0.0140816	0.000323897
LOC5572308	AAEL009700	Down	-0.2008	0.0218599	6.40106e-06
LOC5566126	AAEL005201	Down	-0.200944	0.0657494	0.00359928
LOC5571444	AAEL009080	Down	-0.201083	0.0348807	0.00121143
LOC5575714	AAEL012023	Down	-0.201297	0.0538963	0.00310937
LOC5567125	AAEL005882	Down	-0.201471	0.053295	0.00102185
LOC5571075	AAEL008790	Down	-0.201691	0.0559921	0.00180463
LOC5578729	AAEL013844	Down	-0.20186	0.050726	0.00089883
LOC110679171	AAEL009684	Down	-0.202019	0.0294669	0.000238229
LOC5580186	AAEL002562	Down	-0.202111	0.0512227	0.00267487
LOC5572595	AAEL009913	Down	-0.202521	0.0540184	0.00159986
LOC5568212	AAEL006659	Down	-0.202598	0.0511798	0.000912709
LOC5577519	AAEL021813	Down	-0.202617	0.0342137	0.000174112
LOC5564681	AAEL008334	Down	-0.202873	0.0548514	0.000551875
LOC5568213	AAEL019739	Down	-0.202894	0.0551194	0.00140571
LOC5580315	AAEL012897	Down	-0.203271	0.0194431	0.000177228
LOC5574338	AAEL002334	Down	-0.204016	0.015435	0.000309404
LOC5567139	AAEL005890	Down	-0.204017	0.0425171	0.000300716
LOC5575837	AAEL012094	Down	-0.204327	0.0285645	4.33143e-05
LOC5576927	AAEL019449	Down	-0.20455	0.0479793	0.00219484
LOC5564604	AAEL014529	Down	-0.204844	0.0421572	0.00026389
LOC5569067	AAEL001218	Down	-0.204928	0.0340436	4.01867e-05
LOC5572538	AAEL009862	Down	-0.204943	0.0346374	0.00123288
LOC5567467	AAEL000967	Down	-0.204998	0.0585897	0.00212613
LOC5569629	AAEL007787	Down	-0.205425	0.0235735	3.72166e-05
LOC5568759	AAEL007120	Down	-0.206121	0.0664709	0.00241204
LOC5566869	AAEL000842	Down	-0.206336	0.0516764	0.000736034
LOC5565077	AAEL014709	Down	-0.206584	0.052818	0.000580865
LOC5576630	AAEL025049	Down	-0.206777	0.0616157	0.00258683
LOC5577369	AAEL000454	Down	-0.206814	0.0170354	1.09377e-06
LOC5569668	AAEL007811	Down	-0.206881	0.0538492	0.00114897
LOC5566936	AAEL005699	Down	-0.206999	0.0319046	0.000606098
LOC5572043	AAEL000234	Down	-0.207314	0.0367322	7.07058e-05
LOC5568843	AAEL007162	Down	-0.207341	0.0146127	0.000239013
LOC5576042	AAEL012279	Down	-0.207705	0.0304794	0.000122252
LOC5564922	AAEL004490	Down	-0.207712	0.0673214	0.00296643
LOC5567722	AAEL021386	Down	-0.208137	0.0309405	7.5944e-05
LOC5578843	AAEL003731	Down	-0.208296	0.0558098	0.00171618
LOC5576310	AAEL012457	Down	-0.208446	0.034842	0.000930278
LOC5579326	AAEL015575	Down	-0.208472	0.0298866	5.17065e-05
LOC5572347	AAEL009733	Down	-0.208725	0.020363	4.3009e-05
LOC5572023	AAEL000219	Down	-0.208919	0.02389	9.24672e-05
LOC5580194	AAEL002539	Down	-0.209004	0.0217345	2.33799e-05
LOC5571997	AAEL009487	Down	-0.209159	0.0295235	0.000256953
LOC5564296	AAEL014393	Down	-0.209274	0.0272415	3.58696e-05
LOC5574064	AAEL010900	Down	-0.209638	0.0429117	0.00209502
LOC5567155	AAEL005909	Down	-0.210389	0.049376	0.000741691
LOC5570773	AAEL008528	Down	-0.210559	0.0700114	0.00339932
LOC5579822	AAEL005521	Down	-0.211043	0.0743966	0.004999
LOC5566642	AAEL020002	Down	-0.211178	0.0486372	0.00056971
LOC5568435	AAEL006839	Down	-0.211362	0.0688903	0.00298286
LOC5575049	AAEL011594	Down	-0.211641	0.0619425	0.00238195
LOC5572548	AAEL009874	Down	-0.21166	0.0401159	0.000197238
LOC5567734	AAEL024283	Down	-0.212149	0.0419922	0.000464496
LOC5569787	AAEL023098	Down	-0.212185	0.022675	9.24446e-05
LOC5572925	AAEL010143	Down	-0.212538	0.0314688	3.43596e-05
LOC5578293	AAEL022819	Down	-0.212551	0.0247979	3.21899e-05
LOC5565689	AAEL014215	Down	-0.21295	0.0705939	0.00339932
LOC110675983	AAEL024191	Down	-0.213228	0.0512337	0.000552661
LOC5574782	AAEL011425	Down	-0.21347	0.0442978	0.00220815
LOC5569141	AAEL007390	Down	-0.213589	0.0340197	0.000207894
LOC5580190	AAEL002548	Down	-0.213598	0.0691243	0.00239952
LOC5580070	AAEL002160	Down	-0.213611	0.0186713	0.000338112
LOC5571609	AAEL009201	Down	-0.214024	0.00923249	6.98036e-05
LOC5564073	AAEL004057	Down	-0.214087	0.066439	0.00235066
LOC5573948	AAEL002183	Down	-0.214173	0.0182537	0.000323146
LOC5568194	AAEL006611	Down	-0.214209	0.0382164	0.000166527
LOC5570653	AAEL008461	Down	-0.214352	0.0169424	6.15693e-06
LOC5565699	AAEL004931	Down	-0.214509	0.0325674	5.51878e-05
LOC5567821	AAEL000986	Down	-0.215128	0.0151903	0.000209162
LOC5571685	AAEL009214	Down	-0.215444	0.01196	2.07898e-07
LOC5565000	AAEL004529	Down	-0.215642	0.054943	0.000435419
LOC5566986	AAEL005734	Down	-0.215939	0.0435838	0.000474994
LOC5566763	AAEL012410	Down	-0.215982	0.0414207	0.00153729
LOC5564842	AAEL018350	Down	-0.216215	0.0372134	0.000260162
LOC5567500	AAEL006117	Down	-0.216405	0.0290893	9.86255e-05
LOC5580095	AAEL002137	Down	-0.216493	0.0339051	0.0005669
LOC5573952	AAEL002225	Down	-0.216595	0.0470986	0.000439733
LOC5564593	AAEL004327	Down	-0.216995	0.0452221	0.000142973
LOC5571495	AAEL001607	Down	-0.217193	0.0616576	0.00165797
LOC5576362	AAEL002879	Down	-0.217223	0.018735	0.000396262
LOC5578517	AAEL013724	Down	-0.217878	0.0547236	0.000695566
LOC5567964	AAEL006425	Down	-0.21796	0.0142933	0.000357348
LOC5576975	AAEL003071	Down	-0.218101	0.0436061	0.000466664
LOC5574953	AAEL011551	Down	-0.218116	0.0180178	0.000384314
LOC5564938	AAEL004485	Down	-0.218571	0.0601595	0.000887757
LOC5572601	AAEL009932	Down	-0.218693	0.0266027	3.7837e-05
LOC5566596	AAEL000758	Down	-0.218727	0.0328616	0.000264157
LOC5575996	AAEL002758	Down	-0.218738	0.0561101	0.000764301
LOC5572903	AAEL010116	Down	-0.218764	0.0385309	6.08176e-05
LOC23687660	AAEL021255	Down	-0.219112	0.0477801	0.000223177
LOC5564673	AAEL014557	Down	-0.219112	0.0536358	0.000688342
LOC5576629	AAEL012658	Down	-0.219247	0.0256848	4.2276e-05
LOC5569984	AAEL008073	Down	-0.219365	0.0161142	0.000317201
LOC5567636	AAEL024235	Down	-0.219373	0.0411948	0.000304303
LOC5569816	AAEL001307	Down	-0.219651	0.0288709	0.000233556
LOC5568658	AAEL007001	Down	-0.2197	0.0284575	6.13336e-05
LOC5564131	AAEL004119	Down	-0.220539	0.0575967	0.000659301
LOC5573885	AAEL010798	Down	-0.220748	0.0205144	1.91852e-05
LOC5570821	AAEL008594	Down	-0.220991	0.0263166	7.08401e-05
LOC5565857	AAEL005046	Down	-0.221282	0.0440166	0.000273427
LOC5571084	AAEL008789	Down	-0.22135	0.0815617	0.00819836
LOC5577945	AAEL019754	Down	-0.221377	0.038483	0.000210297
LOC5569013	AAEL007298	Down	-0.221907	0.023272	0.000307521
LOC5572663	AAEL001853	Down	-0.222387	0.0565702	0.00076832
LOC5573878	AAEL010799	Down	-0.222436	0.0159565	0.000199547
LOC5568093	AAEL006507	Down	-0.222635	0.0483772	0.000448849
LOC5565652	AAEL004902	Down	-0.222677	0.0253549	9.81358e-05
LOC5570433	AAEL019748	Down	-0.222747	0.0247834	4.76838e-05
LOC5564510	AAEL004278	Down	-0.22275	0.0568361	0.000954209
LOC5574335	AAEL002349	Down	-0.22289	0.0414193	0.000194011
LOC5575665	AAEL002694	Down	-0.223189	0.0704704	0.0029994
LOC5574583	AAEL002428	Down	-0.223879	0.0653243	0.00239251
LOC5575372	AAEL011776	Down	-0.224112	0.0492059	0.000366889
LOC5565618	AAEL021782	Down	-0.224171	0.0248162	0.000104965
LOC5567679	AAEL006247	Down	-0.224207	0.0532183	0.000557537
LOC5569936	AAEL008025	Down	-0.224209	0.0332644	0.000115598
LOC5579502	AAEL019762	Down	-0.224289	0.0627416	0.00188763
LOC5571000	AAEL008733	Down	-0.224542	0.072271	0.0031367
LOC110675150	AAEL020753	Down	-0.224789	0.0408264	0.000232019
LOC5569042	AAEL007332	Down	-0.224969	0.0374737	0.000942856
LOC5580021	AAEL009646	Down	-0.22502	0.0246528	1.15865e-05
LOC5564039	AAEL004065	Down	-0.22506	0.0215874	9.84457e-06
LOC5579150	AAEL014024	Down	-0.225125	0.0391143	0.000354804
LOC5564020	AAEL014280	Down	-0.22531	0.0644815	0.00158863
LOC5575109	AAEL011650	Down	-0.225572	0.0674946	0.00175185
LOC5569288	AAEL007547	Down	-0.225649	0.039295	0.000380203
LOC5566081	AAEL005162	Down	-0.226028	0.0376912	0.000100192
LOC5563667	AAEL000550	Down	-0.22619	0.0707501	0.00325356
LOC5574526	AAEL011197	Down	-0.226277	0.00943429	0.000139739
LOC5576391	AAEL014891	Down	-0.226279	0.0499399	0.00061739
LOC5565589	AAEL004865	Down	-0.226613	0.0125745	4.30223e-09
LOC5571804	AAEL009324	Down	-0.226702	0.0361089	5.47065e-05
LOC5574565	AAEL027434	Down	-0.226707	0.0659064	0.0027755
LOC5565563	AAEL004832	Down	-0.227058	0.054805	0.000779371
LOC5575684	AAEL011995	Down	-0.227089	0.0341123	0.00064255
LOC5563706	AAEL003921	Down	-0.227172	0.0384394	0.000254627
LOC5568668	AAEL007022	Down	-0.227435	0.0367767	0.000139906
LOC5578928	AAEL003768	Down	-0.227509	0.0706241	0.00469144
LOC5574458	AAEL011180	Down	-0.227524	0.00866226	0.00011431
LOC5576099	AAEL002781	Down	-0.228048	0.0386634	0.000104871
LOC5569237	AAEL026565	Down	-0.22814	0.00876714	3.68507e-06
LOC110678647	AAEL026946	Down	-0.22816	0.0668333	0.00191517
LOC5570218	AAEL008153	Down	-0.228251	0.0371768	5.4163e-05
LOC5568367	AAEL001092	Down	-0.228716	0.0251865	4.9296e-06
LOC5571011	AAEL008736	Down	-0.228954	0.0343119	0.000169502
LOC5568344	AAEL019499	Down	-0.229134	0.0452191	0.00031084
LOC5575492	AAEL011871	Down	-0.229392	0.0132855	0.000182546
LOC5573061	AAEL010245	Down	-0.229425	0.0513791	0.000530816
LOC5578104	AAEL003428	Down	-0.229736	0.0225313	3.00902e-05
LOC5576957	AAEL012918	Down	-0.229814	0.0574182	0.00102624
LOC5573615	AAEL010611	Down	-0.229882	0.0138539	5.47894e-06
LOC5570053	AAEL000204	Down	-0.230182	0.0208553	3.8475e-05
LOC5575273	AAEL011742	Down	-0.230288	0.0189965	0.000386494
LOC5574214	AAEL024525	Down	-0.230405	0.0440846	0.000258847
LOC5568996	AAEL007290	Down	-0.230771	0.0367355	8.46003e-05
LOC5568239	AAEL006684	Down	-0.230854	0.0603125	0.00121713
LOC110673981	AAEL010650	Down	-0.231027	0.0469087	0.000359957
LOC5564487	AAEL004288	Down	-0.231216	0.0272791	2.13128e-05
LOC5577060	AAEL003109	Down	-0.231233	0.0427745	0.000229294
LOC5564232	AAEL022725	Down	-0.231356	0.0442135	0.00165893
LOC23687495	AAEL017075	Down	-0.231395	0.0134521	0.000173343
LOC23687502	AAEL017082	Down	-0.231516	0.0404643	0.000132165
LOC5574382	AAEL011099	Down	-0.231764	0.0210115	3.05893e-05
LOC5574814	AAEL002469	Down	-0.231877	0.0615523	0.000995086
LOC5574971	AAEL019422	Down	-0.231961	0.0487926	0.000316376
LOC5566529	AAEL015199	Down	-0.231994	0.0671785	0.00180744
LOC5578758	AAEL003695	Down	-0.23237	0.0503072	0.00059852
LOC5570839	AAEL008613	Down	-0.232378	0.0625446	0.000654362
LOC5565278	AAEL023512	Down	-0.232933	0.0372939	6.32537e-05
LOC5579840	AAEL005843	Down	-0.233111	0.0340973	0.000722408
LOC5564055	AAEL004052	Down	-0.233164	0.0535936	0.000665372
LOC5569448	AAEL001244	Down	-0.23321	0.0746656	0.00297753
LOC5575141	AAEL000372	Down	-0.233333	0.05241	0.00092207
LOC5567465	AAEL000942	Down	-0.233607	0.0270374	0.000129569
LOC5564902	AAEL014644	Down	-0.233864	0.0504577	0.000167573
LOC5576943	AAEL018699	Down	-0.233885	0.0342078	9.30877e-05
LOC5576069	AAEL026118	Down	-0.233935	0.0188985	0.000267446
LOC5569505	AAEL007685	Down	-0.233935	0.0585404	0.00306031
LOC5580280	AAEL003006	Down	-0.234003	0.0248319	2.6271e-05
LOC5567623	AAEL006226	Down	-0.23413	0.0468679	0.000204975
LOC5563812	AAEL014142	Down	-0.234191	0.0419205	0.000160688
LOC5564769	AAEL004438	Down	-0.234783	0.0268116	2.38774e-05
LOC5579263	AAEL011873	Down	-0.234806	0.02405	1.65446e-05
LOC5569868	AAEL007979	Down	-0.235006	0.0624069	0.00151996
LOC5572284	AAEL001759	Down	-0.235103	0.00609919	4.95973e-05
LOC5571789	AAEL009317	Down	-0.235165	0.0215913	1.38185e-05
LOC5564793	AAEL004436	Down	-0.235179	0.0293633	3.75613e-05
LOC5577888	AAEL013404	Down	-0.235491	0.0647919	0.00143878
LOC5571047	AAEL008768	Down	-0.235647	0.0170107	0.000308949
LOC5564078	AAEL014296	Down	-0.235721	0.0346869	0.00010143
LOC5575223	AAEL010608	Down	-0.236247	0.0252933	8.20221e-05
LOC5579632	AAEL014130	Down	-0.2363	0.057134	0.000748828
LOC5570322	AAEL001372	Down	-0.236397	0.0719981	0.00226488
LOC5571932	AAEL009387	Down	-0.236833	0.0225302	9.71826e-06
LOC5578996	AAEL003777	Down	-0.237142	0.047366	3.36234e-05
LOC5566119	AAEL022497	Down	-0.237144	0.0240747	3.46017e-06
LOC5580278	AAEL003011	Down	-0.237299	0.0175362	0.000280526
LOC5571908	AAEL020123	Down	-0.237986	0.0632364	0.00163052
LOC5578150	AAEL013538	Down	-0.238089	0.0487933	0.00185056
LOC5572799	AAEL001904	Down	-0.238128	0.0278009	2.25048e-05
LOC5572265	AAEL001769	Down	-0.23817	0.0361894	0.000840965
LOC5572735	AAEL010012	Down	-0.238259	0.0164805	0.000316155
LOC5564858	AAEL004467	Down	-0.2386	0.0307013	0.000834054
LOC5571502	AAEL001601	Down	-0.238662	0.0507577	0.000216526
LOC5573139	AAEL002009	Down	-0.238681	0.0662036	0.00121944
LOC5574864	AAEL011465	Down	-0.239411	0.0604665	0.00103106
LOC5577089	AAEL012993	Down	-0.239423	0.0639719	0.00101769
LOC5574862	AAEL011468	Down	-0.239684	0.0135649	0.000206304
LOC5565040	AAEL004574	Down	-0.239863	0.0691659	0.00172453
LOC5568083		Down	-0.239997	0.0484049	0.00168598
LOC5578146	AAEL013527	Down	-0.240069	0.0245773	3.91783e-05
LOC110680553	AAEL022056	Down	-0.2401	0.0721007	0.00250522
LOC5580279	AAEL002986	Down	-0.240138	0.0563427	0.000478773
LOC23687700	AAEL017280	Down	-0.240579	0.0457421	0.000288932
LOC5566059	AAEL005143	Down	-0.240661	0.0110583	0.000153767
LOC5567364	AAEL006035	Down	-0.240673	0.0429205	0.000156839
LOC5565981	AAEL005092	Down	-0.240842	0.0467784	0.000241894
LOC5563793	AAEL003923	Down	-0.240862	0.0556352	0.000982558
LOC5563880	AAEL014198	Down	-0.240891	0.0283239	1.48495e-05
LOC5573381	AAEL028161	Down	-0.241269	0.0637643	0.00109648
LOC5568274	AAEL022413	Down	-0.241383	0.0509641	0.000179522
LOC5578306	AAEL013623	Down	-0.2415	0.0108394	8.54912e-05
LOC5574943	AAEL010453	Down	-0.241508	0.0336453	5.82774e-05
LOC5579798	AAEL003973	Down	-0.24163	0.0590804	0.000614415
LOC5564565	AAEL019830	Down	-0.241845	0.0675869	0.00158468
LOC5567419	AAEL006066	Down	-0.241933	0.0347626	9.37958e-05
LOC5569333	AAEL007555	Down	-0.24206	0.038967	6.9746e-05
LOC5571308	AAEL008962	Down	-0.242209	0.0532075	0.000504426
LOC5579490	AAEL015283	Down	-0.242329	0.0627605	0.0009776
LOC5572195	AAEL014715	Down	-0.24247	0.0202948	6.46728e-06
LOC5568780	AAEL007136	Down	-0.24273	0.0730129	0.00242773
LOC5574958	AAEL011560	Down	-0.243544	0.047363	0.00170003
LOC5571262	AAEL001569	Down	-0.244083	0.0282603	6.17907e-05
LOC5570941	AAEL008683	Down	-0.244093	0.0722965	0.00190703
LOC5576917	AAEL012860	Down	-0.244586	0.0173785	0.000107597
LOC110677933	AAEL027357	Down	-0.244667	0.0213133	1.2547e-05
LOC23687805	AAEL017385	Down	-0.244756	0.0365253	0.000881695
LOC5578941	AAEL003769	Down	-0.244771	0.0338549	6.32256e-05
LOC5572671	AAEL001869	Down	-0.245198	0.0480909	0.00029529
LOC5569188	AAEL019609	Down	-0.245214	0.0417857	0.000302376
LOC5574975	AAEL002526	Down	-0.24525	0.0151905	0.00030973
LOC5571755	AAEL009278	Down	-0.245873	0.0242396	3.74728e-05
LOC5569898	AAEL008002	Down	-0.246826	0.0173687	0.000322111
LOC5578267	AAEL003492	Down	-0.246908	0.0122247	4.26397e-06
LOC5570478	AAEL019542	Down	-0.247094	0.0647208	0.000899677
LOC5579933	AAEL028635	Down	-0.247399	0.0407503	0.000160991
LOC5569343	AAEL007554	Down	-0.247639	0.0712165	0.00171664
LOC5579028	AAEL013963	Down	-0.247937	0.0754828	0.00144087
LOC5566684	AAEL005567	Down	-0.248099	0.0214083	2.1067e-05
LOC5569012	AAEL007292	Down	-0.248129	0.0617105	0.000658044
LOC5577183	AAEL013061	Down	-0.24825	0.0620115	0.00101974
LOC5579810	AAEL005515	Down	-0.248344	0.0121597	2.14244e-07
LOC5570115	AAEL008080	Down	-0.24855	0.0255809	6.41796e-05
LOC5573407	AAEL002077	Down	-0.248796	0.0384379	2.84104e-05
LOC5565260	AAEL025650	Down	-0.248845	0.049837	0.00162889
LOC5573678	AAEL010661	Down	-0.248862	0.0190403	4.28328e-06
LOC5574790	AAEL002463	Down	-0.248989	0.042161	6.31482e-05
LOC5566526	AAEL005454	Down	-0.249148	0.0383533	0.0001028
LOC5576587	AAEL002933	Down	-0.249202	0.0272312	7.53729e-05
LOC5569745	AAEL007883	Down	-0.249277	0.0144717	0.000196645
LOC5571284	AAEL001540	Down	-0.249345	0.0623669	0.00100955
LOC5565805	AAEL019932	Down	-0.249384	0.0522419	0.000461661
LOC5566123	AAEL005187	Down	-0.249528	0.0679467	0.0010489
LOC5577991	AAEL003383	Down	-0.249638	0.0527864	0.000839755
LOC5564924	AAEL023756	Down	-0.250144	0.0293285	9.20946e-05
LOC5566703	AAEL005583	Down	-0.250256	0.0614485	0.000616356
LOC5579903	AAEL001022	Down	-0.250366	0.0372548	0.00010745
LOC5574564	AAEL011240	Down	-0.2504	0.0539123	0.000344145
LOC5580025	AAEL026253	Down	-0.250495	0.0659014	0.000478171
LOC5578151	AAEL013537	Down	-0.250978	0.0405036	0.000127711
LOC5565621	AAEL020696	Down	-0.251002	0.0428301	1.35934e-05
LOC23687802	AAEL018254	Down	-0.251072	0.0667749	0.00201153
LOC5576764	AAEL012750	Down	-0.251752	0.0398539	0.000451996
LOC5572184	AAEL019431	Down	-0.251811	0.0704282	0.00172312
LOC5565229	AAEL004675	Down	-0.252188	0.0624526	0.0011568
LOC5578261	AAEL003494	Down	-0.252285	0.0642827	0.0008232
LOC5566143	AAEL005213	Down	-0.25234	0.0199893	9.52588e-06
LOC5571900	AAEL009377	Down	-0.252636	0.0385088	0.000230423
LOC5571294	AAEL001582	Down	-0.252763	0.067917	0.000788256
LOC5573489	AAEL014505	Down	-0.252772	0.0201588	1.57301e-06
LOC5566371	AAEL005364	Down	-0.252941	0.0436071	0.000141475
LOC23687462	AAEL017042	Down	-0.253001	0.0253979	4.44159e-06
LOC5577042	AAEL012964	Down	-0.253439	0.0167244	0.000213509
LOC5568502	AAEL019567	Down	-0.253481	0.0331664	3.9297e-05
LOC5574197	AAEL002296	Down	-0.253487	0.0310552	7.93794e-05
LOC5573372	AAEL010467	Down	-0.254177	0.0245943	4.13714e-05
LOC23687644	AAEL017224	Down	-0.254399	0.0588759	0.000839216
LOC5572040	AAEL000226	Down	-0.254528	0.0661947	0.000823344
LOC5571419	AAEL009068	Down	-0.254803	0.0676952	0.00324544
LOC5569798	AAEL001314	Down	-0.254972	0.0275543	4.13036e-05
LOC5571558	AAEL009148	Down	-0.255573	0.0450664	0.000278867
LOC5574354	AAEL002362	Down	-0.255633	0.0719694	0.00150158
LOC5568951	AAEL007261	Down	-0.255762	0.0546965	0.00035856
LOC5567129	AAEL005884	Down	-0.255859	0.0356301	0.000113039
LOC5563971	AAEL004023	Down	-0.255926	0.035835	0.000835733
LOC5574237	AAEL011006	Down	-0.256156	0.05426	0.000188978
LOC5566309	AAEL005308	Down	-0.256494	0.0324742	3.91985e-05
LOC5567819	AAEL018151	Down	-0.256495	0.0621319	0.000734237
LOC5574655	AAEL022570	Down	-0.256559	0.011091	1.37915e-06
LOC5568450	AAEL006863	Down	-0.256712	0.0265022	4.05953e-05
LOC23687431	AAEL023560	Down	-0.257027	0.0737605	0.00129485
LOC5575526	AAEL011900	Down	-0.257108	0.05873	0.000420429
LOC5571277	AAEL019617	Down	-0.257121	0.0509031	0.000242662
LOC5579259	AAEL015653	Down	-0.257177	0.0420322	0.000109349
LOC5571735	AAEL009257	Down	-0.257212	0.0100862	0.000116587
LOC5564725	AAEL019855	Down	-0.257299	0.0334189	5.35007e-05
LOC5579901	AAEL001052	Down	-0.257393	0.0199053	0.000187569
LOC5576427	AAEL012519	Down	-0.257459	0.0707307	0.00408856
LOC5571418	AAEL009059	Down	-0.257563	0.0275204	4.53145e-05
LOC5565961	AAEL005048	Down	-0.25773	0.0342286	0.000527586
LOC5576995	AAEL003066	Down	-0.257777	0.0187158	0.000243986
LOC110678790	AAEL020582	Down	-0.258041	0.0495444	0.000291615
LOC5578696	AAEL025569	Down	-0.258067	0.0558603	0.000451341
LOC5575301	AAEL023523	Down	-0.258717	0.0300643	0.000146248
LOC5578926	AAEL003746	Down	-0.259083	0.0340509	3.33235e-05
LOC5577718	AAEL019528	Down	-0.259141	0.0386765	6.56936e-05
LOC5567660	AAEL012740	Down	-0.259336	0.00651425	2.96839e-05
LOC5566377	AAEL005358	Down	-0.259674	0.0572796	0.000493362
LOC5569927	AAEL008015	Down	-0.259874	0.0606288	0.000863551
LOC5568193	AAEL021979	Down	-0.260391	0.0592552	0.000575027
LOC5570335	AAEL019669	Down	-0.260417	0.0138804	0.000159515
LOC5567260	AAEL005928	Down	-0.261191	0.0341923	0.000452745
LOC5574555	AAEL011233	Down	-0.261383	0.0386117	0.000613594
LOC5566551	AAEL005471	Down	-0.261639	0.012162	0.000180289
LOC5576036	AAEL019440	Down	-0.261713	0.0663157	0.000710457
LOC23687408	AAEL019737	Down	-0.261732	0.0574367	0.000434396
LOC5564400	AAEL004235	Down	-0.261877	0.0534515	0.000382512
LOC5566140	AAEL005171	Down	-0.261945	0.0659334	0.00143069
LOC5577739	AAEL019455	Down	-0.262082	0.0578882	0.000319069
LOC5569725	AAEL007885	Down	-0.262103	0.0546812	0.000256736
LOC5570784	AAEL022646	Down	-0.262251	0.0161119	0.000255606
LOC5565536	AAEL004852	Down	-0.262429	0.0702156	0.000864047
LOC5571763	AAEL009287	Down	-0.262512	0.0164983	0.000249336
LOC5573821	AAEL010743	Down	-0.262567	0.0409702	0.000160516
LOC5573265	AAEL010360	Down	-0.262845	0.0470968	0.000125374
LOC5572840	AAEL010063	Down	-0.262919	0.02506	0.000353566
LOC5563960	AAEL004010	Down	-0.263255	0.0213765	1.31551e-05
LOC5575898	AAEL002737	Down	-0.263676	0.0102215	7.53312e-05
LOC5566366	AAEL020311	Down	-0.263995	0.044137	0.000189887
LOC5572552	AAEL009883	Down	-0.264081	0.0501799	0.000420568
LOC110674160	AAEL022282	Down	-0.264154	0.0337327	0.000534506
LOC5568611	AAEL006976	Down	-0.264556	0.0376075	8.31617e-05
LOC5572372	AAEL009760	Down	-0.265172	0.0127788	2.61551e-06
LOC5568266	AAEL006688	Down	-0.265886	0.0355388	4.2676e-05
LOC5573117	AAEL001960	Down	-0.265931	0.033587	0.000146027
LOC5577999	AAEL003393	Down	-0.26594	0.0111057	1.30434e-06
LOC5570111	AAEL008097	Down	-0.266122	0.0246274	1.173e-05
LOC5578522	AAEL013731	Down	-0.266218	0.0578833	0.000586065
LOC5567857	AAEL006315	Down	-0.266554	0.0360489	0.000599402
LOC5566651	AAEL005500	Down	-0.266762	0.0338731	8.4758e-05
LOC5577510	AAEL003180	Down	-0.266804	0.0320688	3.37023e-05
LOC5570230	AAEL008152	Down	-0.267206	0.0284245	1.34737e-05
LOC5575435	AAEL002644	Down	-0.267662	0.0483869	0.000430353
LOC5575496	AAEL027465	Down	-0.267697	0.0707953	0.00134823
LOC5570550	AAEL008363	Down	-0.267852	0.0433104	8.10931e-05
LOC110678983	AAEL025807	Down	-0.267972	0.0180605	0.000300683
LOC5573046	AAEL010224	Down	-0.268141	0.0489701	0.000212562
LOC110675403	AAEL026415	Down	-0.268553	0.032783	5.08444e-05
LOC5580023	AAEL009649	Down	-0.268961	0.0662615	0.00123211
LOC5570984	AAEL020513	Down	-0.269205	0.022301	4.14662e-06
LOC23687783	AAEL017363	Down	-0.269248	0.0448906	0.00012774
LOC110676240	AAEL025610	Down	-0.269716	0.0448619	0.000272918
LOC5568149	AAEL006587	Down	-0.26989	0.0479937	0.000250201
LOC5574966	AAEL002527	Down	-0.270019	0.0249842	1.76407e-05
LOC5567538	AAEL006144	Down	-0.270104	0.06333	0.000896188
LOC5566686	AAEL005573	Down	-0.270372	0.0611748	0.000556711
LOC5564874	AAEL004460	Down	-0.270382	0.0136192	0.000141588
LOC5573710	AAEL019460	Down	-0.270579	0.0418416	6.51273e-05
LOC5579094	AAEL003832	Down	-0.270598	0.128898	0.0375925
LOC5568599	AAEL019594	Down	-0.270818	0.0575605	0.0003352
LOC5563554	AAEL000081	Down	-0.270827	0.061663	0.000793904
LOC5576869	AAEL019619	Down	-0.270986	0.0398022	0.000160837
LOC5568096	AAEL006510	Down	-0.270991	0.0451735	0.000139933
LOC5567072	AAEL005816	Down	-0.271165	0.0491829	0.000198387
LOC5569897	AAEL008000	Down	-0.271175	0.0674371	0.000697867
LOC5571500	AAEL001623	Down	-0.271519	0.0154089	0.000226501
LOC5572314	AAEL022930	Down	-0.273353	0.0499394	0.00124216
LOC5574577	AAEL021839	Down	-0.27359	0.0679322	0.000835837
LOC5569556	AAEL007760	Down	-0.273992	0.0481089	0.000290422
LOC5571296	AAEL001549	Down	-0.274118	0.0380506	3.81055e-05
LOC5564061	AAEL004043	Down	-0.275076	0.0483053	0.000305424
LOC5569700	AAEL007845	Down	-0.275311	0.0195651	0.000255583
LOC5572533	AAEL009861	Down	-0.275487	0.0719453	0.00203612
LOC110679868	AAEL027050	Down	-0.275667	0.0271365	6.53726e-06
LOC5573058	AAEL010247	Down	-0.275907	0.0619435	0.000357419
LOC23687388	AAEL027199	Down	-0.276424	0.0408807	1.57168e-05
LOC5574184	AAEL002286	Down	-0.276669	0.0735303	0.00108701
LOC23687759	AAEL022698	Down	-0.276868	0.0621729	0.000309479
LOC5579519	AAEL018280	Down	-0.276983	0.0599988	0.000248959
LOC5568046	AAEL006483	Down	-0.277027	0.0132854	0.000127575
LOC5572627	AAEL009946	Down	-0.277198	0.0266447	3.04792e-06
LOC5570666	AAEL008491	Down	-0.277262	0.069575	0.000799596
LOC5565728	AAEL004941	Down	-0.277873	0.0538797	0.000116935
LOC5571557	AAEL009142	Down	-0.278053	0.0429042	8.28034e-05
LOC5570276	AAEL008216	Down	-0.278057	0.0396246	8.83608e-05
LOC110674164	AAEL011982	Down	-0.278225	0.0494601	0.000317379
LOC5578219	AAEL003466	Down	-0.278521	0.069462	0.000682223
LOC5564962	AAEL014889	Down	-0.278566	0.0186868	2.49338e-07
LOC5569504	AAEL018144	Down	-0.278663	0.0372832	0.000614516
LOC5571944	AAEL009432	Down	-0.278906	0.032414	5.32676e-05
LOC5576104	AAEL002777	Down	-0.279028	0.0435598	5.74446e-05
LOC5567081	AAEL005808	Down	-0.279034	0.0404709	8.32086e-05
LOC5579831	AAEL005863	Down	-0.279039	0.0668607	0.000748673
LOC5573495	AAEL010543	Down	-0.279071	0.0696655	0.000593134
LOC5571745	AAEL009275	Down	-0.279697	0.0190551	0.000190302
LOC5574345	AAEL002324	Down	-0.279821	0.0480204	0.00117325
LOC5568120	AAEL018119	Down	-0.280402	0.0701304	0.000500008
LOC5569466	AAEL007662	Down	-0.280427	0.0276621	5.29585e-06
LOC5564787	AAEL004435	Down	-0.28045	0.0284318	7.94339e-06
LOC5565270	AAEL004691	Down	-0.28079	0.018213	6.36419e-06
LOC5566110	AAEL005179	Down	-0.280839	0.0152019	0.000186497
LOC5580068	AAEL002163	Down	-0.280941	0.0395428	8.39445e-06
LOC5571505	AAEL001622	Down	-0.280967	0.0594787	0.000231966
LOC5571136	AAEL008828	Down	-0.280974	0.0291795	1.42246e-05
LOC5564469	AAEL014452	Down	-0.281722	0.0267643	1.83148e-06
LOC5576840	AAEL012825	Down	-0.281919	0.0641046	0.000568134
LOC5574348	AAEL002350	Down	-0.282523	0.0272687	3.7976e-05
LOC5568941	AAEL007235	Down	-0.282867	0.0692059	0.00038659
LOC5574333	AAEL002337	Down	-0.282939	0.0321881	5.02122e-05
LOC5568520	AAEL027905	Down	-0.283021	0.0394939	4.88421e-05
LOC5569049	AAEL007342	Down	-0.283446	0.00927994	8.50967e-05
LOC5569181	AAEL007441	Down	-0.283655	0.0145567	0.000152609
LOC5573863	AAEL010765	Down	-0.283716	0.01401	0.00016859
LOC5571930	AAEL009389	Down	-0.283781	0.0259709	0.000315051
LOC23687901	AAEL017481	Down	-0.284278	0.0161118	0.000136706
LOC5569219	AAEL007484	Down	-0.284938	0.0462033	0.000227108
LOC5567448	AAEL006091	Down	-0.284943	0.0404512	3.26918e-05
LOC5563644	AAEL000077	Down	-0.284974	0.0364348	0.000532774
LOC5570078	AAEL018214	Down	-0.285015	0.0468229	0.000235574
LOC5574982	AAEL021554	Down	-0.285148	0.0610502	0.000484844
LOC110680330	AAEL026634	Down	-0.28531	0.0685527	0.000448418
LOC5572448	AAEL001800	Down	-0.285483	0.0460881	0.000130303
LOC5566804	AAEL005663	Down	-0.286011	0.0566247	0.000236134
LOC5577808	AAEL013394	Down	-0.286387	0.0509895	0.000161458
LOC110681483	AAEL026895	Down	-0.286828	0.0390252	2.58912e-05
LOC5573319	AAEL010403	Down	-0.287339	0.0305486	4.04538e-05
LOC5564047	AAEL004071	Down	-0.287646	0.0140685	0.000152066
LOC5571107	AAEL001526	Down	-0.287895	0.0390651	3.2546e-05
LOC5579157	AAEL014031	Down	-0.287932	0.0504028	0.00017886
LOC110674034	AAEL025611	Down	-0.287945	0.0644079	0.000671967
LOC5564645	AAEL004351	Down	-0.287969	0.0476823	0.00017525
LOC5570554	AAEL008367	Down	-0.288389	0.0375501	6.59084e-05
LOC5567351	AAEL021071	Down	-0.288623	0.0596413	0.000183765
LOC5566166	AAEL005221	Down	-0.288675	0.0174855	0.000205906
LOC5573548	AAEL010589	Down	-0.288819	0.065347	0.000538624
LOC5577286	AAEL025228	Down	-0.289069	0.0545629	0.000269065
LOC5567433	AAEL006098	Down	-0.289181	0.0386609	5.22081e-05
LOC110678456	AAEL021859	Down	-0.289992	0.0629835	0.000326141
LOC5576345	AAEL002866	Down	-0.290321	0.0369153	2.39728e-05
LOC5567360	AAEL020113	Down	-0.290363	0.0555787	0.000208626
LOC5569287	AAEL007539	Down	-0.291015	0.0640279	0.00059034
LOC5567921	AAEL006382	Down	-0.291477	0.047173	5.37164e-05
LOC5569772	AAEL007895	Down	-0.291795	0.051696	0.000281765
LOC5565702	AAEL014943	Down	-0.291964	0.0170771	0.000231975
LOC5571573	AAEL009156	Down	-0.292053	0.0639345	0.000810614
LOC5567637	AAEL006224	Down	-0.292205	0.0265864	2.49622e-05
LOC5574528	AAEL011200	Down	-0.292339	0.0566033	0.000200075
LOC5578431	AAEL000516	Down	-0.292378	0.0275097	9.62991e-06
LOC5568801	AAEL001190	Down	-0.292591	0.0319914	2.70715e-05
LOC5566142	AAEL005175	Down	-0.292643	0.0411253	0.000130309
LOC5569655	AAEL007805	Down	-0.293215	0.0574985	0.000288206
LOC5579816	AAEL018059	Down	-0.293299	0.0681343	0.000925943
LOC5569157	AAEL022180	Down	-0.293695	0.0473896	0.000107349
LOC5569864	AAEL007944	Down	-0.293931	0.0294042	3.28985e-05
LOC5569590	AAEL001247	Down	-0.2942	0.0168604	0.000156553
LOC5574915	AAEL011520	Down	-0.294857	0.0507435	0.000262341
LOC5564934	AAEL022219	Down	-0.295216	0.037708	5.91398e-05
LOC5570511	AAEL001412	Down	-0.295236	0.0499383	0.000178138
LOC5573440	AAEL010477	Down	-0.295751	0.0638679	0.000476279
LOC5577083	AAEL012973	Down	-0.296518	0.0673312	0.00043099
LOC5576139	AAEL022535	Down	-0.297199	0.0367661	3.07086e-05
LOC5568526	AAEL006946	Down	-0.297218	0.0249577	8.54173e-06
LOC5565954	AAEL005084	Down	-0.297268	0.0647835	0.00032429
LOC5565690	AAEL004918	Down	-0.297585	0.0581239	0.000498815
LOC5573704	AAEL010698	Down	-0.297647	0.0455881	6.60268e-05
LOC5578311	AAEL008084	Down	-0.297679	0.0282214	4.6121e-06
LOC5570809	AAEL008582	Down	-0.298807	0.0403691	8.18533e-05
LOC5570801	AAEL008575	Down	-0.298936	0.0705935	0.000476228
LOC5568788	AAEL007132	Down	-0.299463	0.0639089	0.000288931
LOC5564087	AAEL019595	Down	-0.300217	0.0503372	0.00127562
LOC5580237	AAEL012323	Down	-0.300544	0.0472365	2.06277e-05
LOC5574239	AAEL011009	Down	-0.300646	0.0328502	3.21561e-05
LOC5575848	AAEL012113	Down	-0.300918	0.0149548	0.000164954
LOC5574633	AAEL011276	Down	-0.301616	0.0250906	4.3172e-06
LOC5576867	AAEL019672	Down	-0.301628	0.0432289	7.17913e-05
LOC5572931	AAEL010145	Down	-0.301731	0.0101052	5.02918e-08
LOC5565409	AAEL014847	Down	-0.30182	0.023741	3.82043e-06
[truncated: 975 more rows]

## Sheet: EC-like-1
gene	VectorBase_ID	Regulation	de_coef	de_se	de_pval
LOC5570985	AAEL010926	Up	0.86698	0.0892611	1.0786e-06
LOC5578455	AAEL000500	Up	0.838971	0.0541332	3.29897e-06
LOC5570465	AAEL026904	Up	0.77756	0.0121689	3.82338e-08
LOC110676297	AAEL027453	Up	0.768779	0.0649522	1.31856e-05
LOC5576518	AAEL012578	Up	0.752383	0.0526137	5.70055e-06
LOC5574993	AAEL002534	Up	0.610697	0.0140452	3.44472e-05
LOC5567470	AAEL000947	Up	0.596892	0.0610074	5.60371e-06
LOC5570169	AAEL008141	Up	0.57245	0.0919357	0.000197323
LOC5568667		Up	0.561524	0.158291	0.00148276
LOC5568178	AAEL019914	Up	0.539654	0.0758709	0.000164493
LOC5577771	AAEL003318	Up	0.536836	0.0729586	6.72213e-05
LOC5565635	AAEL028015	Up	0.525231	0.102816	0.000846468
LOC5563695	AAEL000549	Up	0.510877	0.134239	0.0010854
LOC23687740	AAEL017320	Up	0.498869	0.0499391	1.04196e-05
LOC5571667	AAEL001641	Up	0.483741	0.0982296	0.000249119
LOC5578998	AAEL021175	Up	0.473461	0.107921	0.000782953
LOC5573776	AAEL000271	Up	0.469465	0.0759493	0.000186424
LOC5577078	AAEL012975	Up	0.467121	0.0562034	3.33017e-05
LOC5575687	AAEL013713	Up	0.463554	0.0367134	1.29002e-05
LOC5565900	AAEL000716	Up	0.456485	0.101979	0.000261844
LOC5579851	AAEL005861	Up	0.450327	0.0747981	0.000298301
LOC5574799	AAEL002487	Up	0.448943	0.0629609	0.00012764
LOC5578307	AAEL013628	Up	0.445409	0.0177941	2.80153e-07
LOC5578010	AAEL003365	Up	0.442872	0.0883366	0.000332527
LOC5578920	AAEL003748	Up	0.442082	0.0744871	0.000353929
LOC5578604	AAEL021931	Up	0.441518	0.0654842	9.30338e-05
LOC5564993	AAEL004522	Up	0.427911	0.0611024	7.12382e-05
LOC110673978	AAEL006000	Up	0.425816	0.0561141	4.86788e-05
LOC5564226	-	Up	0.415615	0.0106115	6.4875e-05
LOC5574619	AAEL008693	Up	0.415349	0.115459	0.00158645
LOC5576327	AAEL000406	Up	0.413662	0.056911	0.000165394
LOC110676831	-	Up	0.41132	0.0482093	3.13657e-05
LOC5574499	AAEL002390	Up	0.403569	0.104733	0.00112441
LOC5578624	AAEL003597	Up	0.401424	0.100189	0.00105864
LOC5568656	-	Up	0.398324	0.0523686	7.08401e-05
LOC5578050	AAEL013484	Up	0.394745	0.0843616	0.000496913
LOC5570515	AAEL001423	Up	0.391555	0.0910367	0.00067104
LOC5572460	AAEL001812	Up	0.390679	0.0930435	0.000976838
LOC5576800	AAEL012783	Up	0.380636	0.0487144	9.3855e-05
LOC5571838	AAEL001693	Up	0.377447	0.0829391	0.000530652
LOC5571215	AAEL007191	Up	0.377203	0.100657	0.00101802
LOC5579310	AAEL015593	Up	0.375901	0.0911809	0.000953906
LOC5579955	AAEL007592	Up	0.375434	0.0846227	0.000509292
LOC5573096	AAEL019690	Up	0.372448	0.109805	0.00260397
LOC5573855	AAEL010776	Up	0.371908	0.0319116	1.56668e-05
LOC5565328	AAEL004727	Up	0.368938	0.0728627	0.000863126
LOC110677076	AAEL023112	Up	0.364969	0.12285	0.00539892
LOC5565437	AAEL000661	Up	0.363213	0.0846345	0.000570553
LOC5572390	AAEL009779	Up	0.353102	0.102038	0.000887348
LOC5564088	AAEL007501	Up	0.34988	0.0907219	0.000511695
LOC5564986	AAEL004520	Up	0.343347	0.0774388	0.000233981
LOC5568663	AAEL007011	Up	0.342977	0.0655714	0.000269464
LOC5579954	AAEL007591	Up	0.340471	0.108295	0.00327926
LOC5566484	AAEL005401	Up	0.337562	0.0158547	1.1576e-07
LOC5576287	AAEL012439	Up	0.335984	0.0806834	0.000668548
LOC5570605	AAEL027597	Up	0.33522	0.107181	0.0029994
LOC5563910	AAEL003986	Up	0.329648	0.0430916	0.000940833
LOC5571799	AAEL009323	Up	0.327378	0.0494581	7.86838e-05
LOC5564567	AAEL014516	Up	0.324116	0.0232857	4.42047e-07
LOC5564544	AAEL004319	Up	0.323543	0.0972004	0.0023875
LOC110674569	AAEL020789	Up	0.323071	0.0638987	0.000136344
LOC110674007	AAEL007669	Up	0.322576	0.0936725	0.00162383
LOC5564010	AAEL014273	Up	0.32107	0.0918488	0.00218388
LOC5569675	AAEL019596	Up	0.31685	0.0733158	0.000438403
LOC5577019	AAEL012931	Up	0.311831	0.0812506	0.0011422
LOC5568091	AAEL006522	Up	0.311768	0.104396	0.00339932
LOC5569755	AAEL007892	Up	0.308453	0.0670123	0.000240351
LOC5571086	AAEL026403	Up	0.308306	0.110761	0.00539892
LOC5579888	AAEL001046	Up	0.303623	0.109714	0.00459908
LOC5576963	AAEL003084	Up	0.30101	0.104125	0.0039992
LOC5579172	AAEL003888	Up	0.298019	0.032383	1.9765e-05
LOC5568617	AAEL006966	Up	0.293038	0.0787957	0.00114942
LOC5566612	AAEL000770	Up	0.292952	0.0814889	0.00177045
LOC5563771	AAEL019480	Up	0.292728	0.0867041	0.0021377
LOC5574903	AAEL019681	Up	0.291809	0.103355	0.00419916
LOC5569531	AAEL007715	Up	0.291451	0.00952791	8.22263e-05
LOC5571788	AAEL027166	Up	0.290783	0.0776457	0.000970819
LOC110673981	AAEL010650	Up	0.288628	0.116352	0.0157968
LOC5578825	AAEL026922	Up	0.287432	0.0439676	0.000168996
LOC5576734	AAEL020340	Up	0.286825	0.0333761	6.64859e-06
LOC110675257	AAEL025410	Up	0.283751	0.11107	0.00739852
LOC5571137	AAEL020307	Up	0.281264	0.0822239	0.00474203
LOC5576321	AAEL000394	Up	0.278089	0.0982249	0.00579884
LOC5568550	-	Up	0.276457	0.136202	0.0375925
LOC5572966	AAEL010181	Up	0.273015	0.0727125	0.00121358
LOC5574043	AAEL010883	Up	0.271716	0.0661622	0.000923779
LOC5570741	AAEL008514	Up	0.271155	0.113025	0.0161968
LOC5571386	AAEL009017	Up	0.269831	0.0625587	0.00073843
LOC5572968	AAEL010168	Up	0.266401	0.0104952	6.63922e-07
LOC5573942	AAEL019793	Up	0.266095	0.078202	0.00166168
LOC110678029	AAEL021557	Up	0.265881	0.0452693	0.001249
LOC5577433	AAEL019845	Up	0.264539	0.0419081	0.00016155
LOC5568916	AAEL019536	Up	0.263191	0.0355996	0.000589045
LOC5573939	AAEL019753	Up	0.26319	0.0971084	0.0079984
LOC5566015	AAEL005111	Up	0.261407	0.0651862	0.00163042
LOC110679302	AAEL027514	Up	0.259025	0.0893325	0.00339932
LOC5573578	AAEL002089	Up	0.254329	0.0725961	0.00224891
LOC110676901	AAEL024164	Up	0.254149	0.112474	0.0225955
LOC5571227	AAEL008928	Up	0.253717	0.0708265	0.00142697
LOC5567028	AAEL005762	Up	0.253124	0.0814978	0.00279944
LOC5565540	AAEL004860	Up	0.251495	0.0612173	0.000723357
LOC5572998	AAEL019851	Up	0.250916	0.116583	0.0275945
LOC5570916	AAEL001501	Up	0.250888	0.0636932	0.000940313
LOC5573540	AAEL010591	Up	0.25077	0.0835804	0.00339932
LOC5566341	AAEL005329	Up	0.250315	0.0739704	0.00446714
LOC5563639	AAEL000020	Up	0.249806	0.111252	0.0213957
LOC5565025	AAEL014702	Up	0.248893	0.0709403	0.00418988
LOC5570108	AAEL020238	Up	0.248114	0.0109312	0.000121395
LOC5566141	AAEL005197	Up	0.246384	0.110628	0.0245951
LOC5570065	AAEL001339	Up	0.246041	0.109896	0.0243951
LOC5565389	AAEL004777	Up	0.245901	0.083426	0.00479904
LOC5571946	AAEL009430	Up	0.243651	0.0798981	0.00267899
LOC5563791	AAEL003944	Up	0.243402	0.0648838	0.00160178
LOC5570432	AAEL008329	Up	0.243167	0.0101677	2.01031e-05
LOC5575269	AAEL011739	Up	0.242986	0.0761054	0.00239952
LOC5573377	AAEL010465	Up	0.242671	0.0922443	0.0079984
LOC5571381	AAEL025929	Up	0.241685	0.0869331	0.00639872
LOC5574289	AAEL011050	Up	0.240671	0.0695545	0.00126313
LOC5569739	AAEL007881	Up	0.240295	0.0768595	0.00239952
LOC5573469	AAEL010513	Up	0.240113	0.0858613	0.00679864
LOC5563647	AAEL000046	Up	0.239725	0.0963004	0.0125975
LOC5572116	AAEL009531	Up	0.238985	0.102308	0.0213957
LOC5573409	AAEL026571	Up	0.235288	0.100212	0.0205959
LOC5578008	AAEL003377	Up	0.233971	0.0991896	0.0163967
LOC5576244	AAEL002851	Up	0.232231	0.0320749	4.72272e-05
LOC5566780	AAEL015247	Up	0.230412	0.0570734	0.000700961
LOC110677960	AAEL023193	Up	0.228625	0.10521	0.0333933
LOC5580056	AAEL002174	Up	0.226616	0.0553731	0.000818985
LOC5572031	AAEL000223	Up	0.22487	0.0877129	0.0135973
LOC5566483	AAEL005413	Up	0.221662	0.104482	0.0303939
LOC5567410	AAEL006069	Up	0.215577	0.0833752	0.0117976
LOC5564255	AAEL004193	Up	0.213703	0.0837954	0.0109978
LOC5575611	AAEL027674	Up	0.212629	0.0401295	0.000114201
LOC5574752	AAEL011390	Up	0.212503	0.0913433	0.0243951
LOC5570958	AAEL008687	Up	0.211968	0.0785772	0.00879824
LOC5567616	AAEL006196	Up	0.211471	0.0720563	0.00379924
LOC5573431	AAEL026825	Up	0.211241	0.063815	0.0018974
LOC5578839	AAEL019482	Up	0.210661	0.0346001	0.00093014
LOC110677919	AAEL020749	Up	0.209398	0.0104573	6.29304e-06
LOC5564228	AAEL004161	Up	0.206031	0.094469	0.0281944
LOC5575820	AAEL012093	Up	0.205616	0.0643763	0.00286061
LOC5573395	AAEL002068	Up	0.205398	0.0704947	0.004999
LOC5565400	AAEL004783	Up	0.202488	0.0181222	0.000262203
LOC5564724	AAEL004404	Up	0.200288	0.0541194	0.0010635
LOC5574612	AAEL011255	Up	0.199977	0.039306	0.000466354
LOC5580119	AAEL023223	Up	0.199386	0.0455993	0.00116005
LOC5574522	AAEL011198	Up	0.199015	0.0946671	0.0367926
LOC5566991	AAEL018351	Up	0.198767	0.0884133	0.0227954
LOC5575846	AAEL012119	Up	0.198233	0.0566003	0.00150779
LOC5574368	AAEL011088	Up	0.19691	0.0686194	0.0059988
LOC5571124	AAEL021581	Up	0.196508	0.088233	0.0241952
LOC5567175	AAEL000903	Up	0.196433	0.0961226	0.044991
LOC5571803	AAEL009330	Up	0.195465	0.0157656	0.000391416
LOC5567898	AAEL006342	Up	0.195244	0.0401763	0.000461439
LOC5573536	AAEL010576	Up	0.19524	0.0683958	0.00459908
LOC5564994	AAEL004527	Up	0.194847	0.0743632	0.0111978
LOC5571886	AAEL019788	Up	0.194584	0.0731149	0.00759848
LOC5564459	AAEL004247	Up	0.193785	0.0517851	0.000971122
LOC5568355	AAEL001061	Up	0.193449	0.0931589	0.0437912
LOC5578793	AAEL003676	Up	0.190817	0.031007	0.00017882
LOC5569850	AAEL007959	Up	0.190458	0.0728125	0.0119976
LOC5565516	AAEL012284	Up	0.189588	0.0751725	0.0135973
LOC5567927	AAEL006372	Up	0.18933	0.0329473	0.000138103
LOC5577645	AAEL019685	Up	0.189046	0.0976432	0.0483903
LOC5567865	AAEL029115	Up	0.18768	0.083131	0.029794
LOC5568869	AAEL007185	Up	0.187265	0.0734237	0.0113977
LOC5572725	AAEL009994	Up	0.187076	0.0112754	2.11479e-06
LOC5572374	AAEL009764	Up	0.18683	0.0627753	0.00559888
LOC5564835	AAEL000622	Up	0.185297	0.0945152	0.0495901
LOC5565804	AAEL005008	Up	0.184367	0.0399186	0.000175351
LOC5578532	AAEL013739	Up	0.18378	0.0445878	0.00129658
LOC5566525	AAEL005455	Up	0.18373	0.0385547	0.00025161
LOC5579214	AAEL014055	Up	0.181729	0.0667279	0.00579884
LOC5568468	AAEL006887	Up	0.18029	0.0718251	0.0135973
LOC5580030	AAEL009653	Up	0.178327	0.00949708	0.0002699
LOC5569932	AAEL008028	Up	0.178204	0.0812183	0.0241952
LOC5566155	AAEL027594	Up	0.178078	0.0785645	0.0231954
LOC5576852	AAEL012835	Up	0.177038	0.0790457	0.025195
LOC5565774	AAEL004988	Up	0.174336	0.0632681	0.00579884
LOC110676249	AAEL024520	Up	0.171898	0.050936	0.00271463
LOC5573290	AAEL010368	Up	0.171678	0.0831318	0.0365927
LOC5571188	AAEL008879	Up	0.171677	0.0422843	0.000785871
LOC5565801	AAEL005001	Up	0.169512	0.033675	0.000282946
LOC5567950	AAEL006390	Up	0.16803	0.0361554	0.00158015
LOC5570148	AAEL008134	Up	0.167755	0.065823	0.0111978
LOC5575982	AAEL019430	Up	0.165059	0.0707129	0.0163967
LOC5570810	AAEL008574	Up	0.164052	0.0407615	0.000616041
LOC5571189	AAEL008878	Up	0.163299	0.066964	0.0157968
LOC5568538	AAEL006956	Up	0.162797	0.0716819	0.0273945
LOC5576203	AAEL012398	Up	0.161425	0.0473469	0.00269028
LOC5569945	AAEL008041	Up	0.160903	0.07492	0.0361928
LOC5572836	AAEL010065	Up	0.159337	0.0540916	0.00359928
LOC5566514	AAEL005460	Up	0.158874	0.0782189	0.0379924
LOC5569529	AAEL007699	Up	0.158023	0.00961116	0.000157266
LOC23687673	AAEL014271	Up	0.154555	0.0367763	0.000616661
LOC5576110	AAEL024908	Up	0.152964	0.0657554	0.0209958
LOC5570686	AAEL008500	Up	0.152651	0.0507074	0.00259948
LOC23687857	AAEL017437	Up	0.145054	0.0387188	0.000793309
LOC5571053	AAEL008769	Up	0.144337	0.0342272	0.00180341
LOC5567423	AAEL006070	Up	0.141255	0.0490838	0.004999
LOC5578966	AAEL013950	Up	0.141039	0.0712554	0.0483903
LOC23687936	AAEL017516	Up	0.141004	0.00950286	3.97552e-06
LOC5577356	AAEL000417	Up	0.14098	0.044547	0.00391588
LOC5572215	AAEL009630	Up	0.140252	0.0658785	0.030194
LOC5564333	AAEL004209	Up	0.139738	0.0525383	0.00819836
LOC5566760	AAEL005618	Up	0.139349	0.0611252	0.0211958
LOC5580329	AAEL013069	Up	0.139059	0.0115473	1.29983e-07
LOC5579167	AAEL021925	Up	0.138755	0.0517855	0.0089982
LOC5576417	AAEL018241	Up	0.137431	0.0498727	0.00679864
LOC5572507	AAEL009843	Up	0.135664	0.0487064	0.00559888
LOC110677764	AAEL024434	Up	0.134346	0.0093934	1.40689e-05
LOC5578096	AAEL003424	Up	0.131803	0.0523455	0.009998
LOC5574167	AAEL010977	Up	0.129578	0.0165644	0.000840083
LOC5565657	AAEL004914	Up	0.128463	0.0455919	0.0059988
LOC5572534	AAEL009859	Up	0.127206	0.0180852	0.000873185
LOC5567163	AAEL005901	Up	0.126903	0.0120448	0.000338604
LOC5569925	AAEL027654	Up	0.124693	0.0204273	0.000211107
LOC5568716	AAEL007049	Up	0.120071	0.055263	0.0327934
LOC5570824	AAEL008600	Up	0.119947	0.0389609	0.00259948
LOC5570455	AAEL008341	Up	0.118759	0.0465546	0.0111978
LOC5571265	AAEL001588	Up	0.114932	0.0519578	0.030194
LOC5576672	AAEL012702	Up	0.113833	0.0439004	0.0109978
LOC5578368	AAEL003530	Up	0.11156	0.00984106	0.000327505
LOC5573413	AAEL002047	Up	0.110743	0.00912381	0.00034937
LOC5566843	AAEL000823	Up	0.10811	0.00950845	3.66381e-06
LOC5577377	AAEL000428	Up	0.107959	0.028937	0.00121627
LOC5570211	AAEL019828	Up	0.106475	0.0380754	0.00679864
LOC5576758	AAEL025553	Up	0.106116	0.00971434	0.000448776
LOC5566236	AAEL005269	Up	0.105323	0.0203585	0.000335793
LOC5573200	AAEL001998	Up	0.104637	0.027881	0.00124585
LOC5575640	AAEL011972	Up	0.103596	0.0439105	0.0183963
LOC5578857	AAEL027402	Up	0.0998783	0.0254852	0.000786277
LOC5578313	AAEL013625	Up	0.0986543	0.0103565	1.88958e-05
LOC5569780	AAEL007926	Up	0.0970419	0.0283881	0.00154746
LOC5564556	AAEL004325	Up	0.096876	0.010994	3.62864e-06
LOC5577761	AAEL003298	Up	0.0949892	0.0281394	0.00321488
LOC5575105	AAEL011656	Up	0.0932353	0.010458	0.000453462
LOC5574844	AAEL011447	Up	0.082263	0.0088694	0.000485768
LOC5575279	AAEL014896	Up	0.0792611	0.031619	0.0107978
LOC5570675	AAEL008481	Up	0.0789882	0.00939828	0.000678005
LOC5578401	AAEL013689	Up	0.07805	0.0255387	0.00250376
LOC5577524	AAEL003203	Up	0.0762314	0.0295558	0.00859828
LOC5575037	AAEL011587	Up	0.0634536	0.00963831	0.000768678
LOC5563590	AAEL000032	Up	0.062744	0.0102621	0.00100104
LOC5580259	AAEL012585	Up	0.0551226	0.00989079	0.00153071
LOC5577996	AAEL003396	Up	0.0506297	0.00902973	0.000292208
LOC5577309	AAEL013158	Up	0.0501819	0.0210449	0.0181964
LOC5570243	AAEL008192	Up	0.0478499	0.0106277	0.00168399
LOC5567848	AAEL000987	Up	0.0444576	0.00928746	0.00165009
LOC5563786	AAEL003942	Up	0.033695	0.00932787	0.00350715
LOC5573217	AAEL010299	Up	0.0334148	0.00942063	0.00175489
LOC5566959	AAEL005722	Up	0.0322476	0.00972478	0.00527928
LOC5577034	AAEL012944	Up	0.0318047	0.0099842	0.00224881
LOC5572090	AAEL009496	Up	0.0303741	0.010385	0.00359928
LOC5565979	AAEL005097	Up	0.0214929	0.0102962	0.0345931
LOC5571564	AAEL009151	Down	-0.0242123	0.0101062	0.0155969
LOC5576653	AAEL012686	Down	-0.0286985	0.00966867	0.00359928
LOC5574866	AAEL011471	Down	-0.0309187	0.00857752	0.00128586
LOC5565553	AAEL022140	Down	-0.0364719	0.00980449	0.000760461
LOC5573827	AAEL010756	Down	-0.0374242	0.00882441	0.0025328
LOC110676045	AAEL022286	Down	-0.043215	0.0102048	0.00243097
LOC5567396	AAEL006053	Down	-0.04909	0.0196832	0.014797
LOC5567031	AAEL005766	Down	-0.054491	0.0220592	0.0131974
LOC5578625	AAEL003582	Down	-0.058893	0.0102636	2.59554e-05
LOC5580036	AAEL010230	Down	-0.0590802	0.028962	0.0437912
LOC5572634	AAEL001863	Down	-0.0610017	0.0166421	0.00364121
LOC5579186	AAEL003872	Down	-0.0629293	0.0119147	0.00174081
LOC110676232	AAEL023983	Down	-0.0639331	0.00972671	0.00094709
LOC5568436	AAEL012661	Down	-0.065118	0.0237172	0.00659868
LOC5574485	AAEL002372	Down	-0.0667108	0.00960368	0.00117413
LOC5566493	AAEL005432	Down	-0.0670997	0.0322089	0.0463907
LOC5573968	AAEL010823	Down	-0.0672305	0.0197133	0.00187621
LOC5568090	AAEL006511	Down	-0.0686553	0.00967668	4.28666e-05
LOC5568481	AAEL006879	Down	-0.0735601	0.0345731	0.0327934
LOC5564921	AAEL004500	Down	-0.0740118	0.0138539	0.00113788
LOC5565156	AAEL004616	Down	-0.0747896	0.0226119	0.00216353
LOC5574648	AAEL011288	Down	-0.0757154	0.0153693	0.000947088
LOC5579525	AAEL014562	Down	-0.0772082	0.00940163	2.26363e-05
LOC5574953	AAEL011551	Down	-0.0775101	0.0361485	0.0341932
LOC5570244	AAEL008188	Down	-0.0778787	0.00900519	5.2943e-06
LOC5573963	AAEL010826	Down	-0.0780933	0.0326629	0.019796
LOC5574626	AAEL011264	Down	-0.0791153	0.0367271	0.0305939
LOC5567793	AAEL000138	Down	-0.0812799	0.0325161	0.0115977
LOC5578505	AAEL013703	Down	-0.0856902	0.0120934	7.83315e-05
LOC5577178	AAEL013047	Down	-0.086523	0.0410886	0.0335933
LOC5577354	AAEL000424	Down	-0.0902963	0.0325603	0.0059988
LOC110674237	AAEL026466	Down	-0.0905192	0.0212943	0.000909866
LOC5578360	AAEL024675	Down	-0.0913336	0.0275312	0.00190854
LOC5577478	AAEL013221	Down	-0.0914107	0.00921901	4.23401e-05
LOC5568260	AAEL006698	Down	-0.0935359	0.00923071	0.000527229
LOC5571186	AAEL029013	Down	-0.094474	0.0162397	0.00122708
LOC23687442	AAEL017022	Down	-0.095411	0.0131242	0.00102041
LOC5565544	AAEL004855	Down	-0.0958468	0.0099605	0.000666688
LOC5563592	AAEL000010	Down	-0.0961626	0.0103406	4.1896e-05
LOC5564058	AAEL004069	Down	-0.0987668	0.0453744	0.0283943
LOC5580268	AAEL027783	Down	-0.0996492	0.041617	0.0203959
LOC23687932	AAEL017512	Down	-0.100282	0.0463415	0.0275945
LOC5568659	AAEL007019	Down	-0.102147	0.0464309	0.0241952
LOC5570363	AAEL008278	Down	-0.102267	0.0404144	0.0109978
LOC5573974	AAEL010821	Down	-0.104267	0.0112057	0.00067398
LOC5569497	AAEL007681	Down	-0.104703	0.0420379	0.0139972
LOC5567839	AAEL001005	Down	-0.104919	0.0278537	0.000718904
LOC5577566	AAEL013272	Down	-0.105156	0.0100367	0.000395585
LOC5569074	AAEL001210	Down	-0.106895	0.0348188	0.00319936
LOC5566800	AAEL005651	Down	-0.107439	0.0476878	0.0255949
LOC5566522	AAEL005451	Down	-0.10933	0.00880274	0.000360004
LOC5566772	AAEL005629	Down	-0.110085	0.00870614	2.03787e-06
LOC5576572	AAEL025570	Down	-0.110629	0.0456639	0.0163967
LOC5564957	AAEL021728	Down	-0.110781	0.0549526	0.0407918
LOC5569566	AAEL007752	Down	-0.111522	0.0165601	0.00107118
LOC23687841	AAEL017421	Down	-0.111552	0.0490884	0.0215957
LOC5572748	AAEL010032	Down	-0.111749	0.0296101	0.000669153
LOC5564212	AAEL004151	Down	-0.113916	0.0100554	1.39958e-05
LOC5578243	AAEL015006	Down	-0.11423	0.00940923	3.63053e-05
LOC5570779	AAEL008553	Down	-0.114567	0.0490343	0.0185963
LOC5577407	AAEL003161	Down	-0.114578	0.0450113	0.00879824
LOC5566298	AAEL000746	Down	-0.115261	0.0530922	0.0283943
LOC5577591	AAEL020476	Down	-0.115845	0.0582811	0.0469906
LOC5566723	AAEL015236	Down	-0.116228	0.0502778	0.0205959
LOC5564012	AAEL014275	Down	-0.116249	0.0471647	0.0117976
LOC5566087	AAEL005165	Down	-0.11682	0.0209367	0.000430906
LOC5568807	AAEL001177	Down	-0.117262	0.0584998	0.039992
LOC5566220	AAEL005270	Down	-0.117504	0.0153291	0.00059296
LOC5575428	AAEL011832	Down	-0.119604	0.0478932	0.0135973
LOC5569143	AAEL007403	Down	-0.119811	0.0574456	0.0425915
LOC5578276	AAEL003503	Down	-0.119928	0.0488915	0.0157968
LOC5575683	AAEL011989	Down	-0.120597	0.0364351	0.00224322
LOC5574665	AAEL011309	Down	-0.120657	0.0389069	0.00259948
LOC5578293	AAEL022819	Down	-0.120723	0.0501422	0.0193961
LOC5576658	AAEL012681	Down	-0.122732	0.0183089	0.000556555
LOC5569950	AAEL008039	Down	-0.122769	0.0198661	8.47764e-05
LOC5573790	AAEL010716	Down	-0.124288	0.0433657	0.00639872
LOC5571450	AAEL009078	Down	-0.125276	0.033256	0.00270589
LOC5570822	AAEL008610	Down	-0.126118	0.0424817	0.00439912
LOC5576103	AAEL002797	Down	-0.126727	0.0390267	0.00246559
LOC110676736	AAEL028202	Down	-0.127568	0.0644775	0.0459908
LOC5564798	AAEL004423	Down	-0.127987	0.0196183	0.000405082
LOC5571544	AAEL009129	Down	-0.131093	0.0298713	0.000344618
LOC5576745	AAEL012731	Down	-0.131611	0.0403169	0.00492459
LOC5580243	AAEL012327	Down	-0.132025	0.0640809	0.0455909
LOC5570090	AAEL001356	Down	-0.13265	0.0455398	0.00379924
LOC5572640	AAEL001838	Down	-0.13268	0.059255	0.0233953
LOC5567962	AAEL019461	Down	-0.13294	0.0650337	0.04979
LOC5564895	AAEL014642	Down	-0.133203	0.0503935	0.0079984
LOC5570159	AAEL008131	Down	-0.13357	0.0427473	0.00219008
LOC5575681	AAEL011992	Down	-0.134224	0.025213	0.00117841
LOC5566289	AAEL018120	Down	-0.134581	0.0366699	0.00136702
LOC5565180	AAEL004603	Down	-0.135673	0.0373154	0.00150088
LOC5570989	AAEL008719	Down	-0.135994	0.053579	0.0089982
LOC5566055	AAEL005150	Down	-0.135999	0.0593727	0.0279944
LOC5569120	AAEL007366	Down	-0.136055	0.0639206	0.0335933
LOC5578575	AAEL013760	Down	-0.136158	0.0508856	0.00879824
LOC5569005	AAEL007282	Down	-0.136218	0.0673239	0.039992
LOC5565930	AAEL005054	Down	-0.136353	0.0608481	0.0259948
LOC5571173	AAEL008871	Down	-0.136724	0.030815	0.000533111
LOC5576349	AAEL002867	Down	-0.137269	0.054798	0.0135973
LOC5575721	AAEL012029	Down	-0.139351	0.0694763	0.044791
LOC5565589	AAEL004865	Down	-0.140023	0.0238836	6.59582e-05
LOC5571444	AAEL009080	Down	-0.140668	0.0698601	0.0475905
LOC5564627	AAEL025567	Down	-0.142426	0.0434942	0.00244977
LOC5573976	AAEL010814	Down	-0.142746	0.0556307	0.00939812
LOC5578301	AAEL013620	Down	-0.143233	0.0641205	0.0239952
LOC5568558	AAEL001134	Down	-0.143437	0.0557252	0.0111978
LOC5575822	AAEL012092	Down	-0.143478	0.0373708	0.000727342
LOC5565282	AAEL014797	Down	-0.144253	0.052256	0.00759848
LOC5575647	AAEL011980	Down	-0.144469	0.0341737	0.0014808
LOC5565608	AAEL004879	Down	-0.144484	0.0736793	0.0491902
LOC5566316	AAEL005305	Down	-0.145052	0.0378753	0.000710444
LOC5568633	AAEL007023	Down	-0.145469	0.0262321	0.000488132
LOC5572193	AAEL009604	Down	-0.145493	0.0334504	0.00186661
LOC5568726	AAEL007078	Down	-0.145667	0.068515	0.0381924
LOC5569067	AAEL001218	Down	-0.145952	0.0618783	0.0193961
LOC5566910	AAEL021232	Down	-0.146043	0.0707574	0.0371926
LOC5564860	AAEL004472	Down	-0.146161	0.0466663	0.00345298
LOC5572650	AAEL001865	Down	-0.146317	0.0295223	0.00027268
LOC110678734	AAEL019403	Down	-0.146409	0.011815	0.000218443
LOC5568150	AAEL006577	Down	-0.147792	0.0620946	0.0181964
LOC5565513	AAEL014863	Down	-0.148844	0.0622563	0.0169966
LOC5571937	AAEL009422	Down	-0.149048	0.0327193	0.000174942
LOC5570505	AAEL001411	Down	-0.149294	0.0477454	0.00578904
LOC5568076	AAEL006520	Down	-0.149659	0.0484146	0.0029994
LOC5571484	AAEL001605	Down	-0.15036	0.0659437	0.0191962
LOC5573038	AAEL025993	Down	-0.150796	0.0743116	0.0483903
LOC5574597	AAEL002418	Down	-0.151085	0.068413	0.0323935
LOC5568471	AAEL006885	Down	-0.151087	0.0161539	0.000592154
LOC5563966	AAEL004025	Down	-0.151109	0.0547028	0.004999
LOC5577499	AAEL003193	Down	-0.152679	0.0472727	0.00551413
LOC5567464	AAEL000930	Down	-0.153022	0.0596002	0.0113977
LOC5580161	AAEL011391	Down	-0.153137	0.0788329	0.0425915
LOC5569069	AAEL001204	Down	-0.153154	0.0703638	0.0367926
LOC5574526	AAEL011197	Down	-0.153158	0.0172726	1.45852e-05
LOC5580057	AAEL002170	Down	-0.153438	0.0658016	0.0217956
LOC5576215	AAEL002832	Down	-0.154329	0.00924401	0.000177588
LOC5564925	AAEL019568	Down	-0.155257	0.0187419	0.000727118
LOC5576353	AAEL002881	Down	-0.156481	0.0156483	3.06153e-06
LOC5576008	AAEL012237	Down	-0.156716	0.0733843	0.034993
LOC5568291	AAEL006748	Down	-0.157466	0.0706452	0.0269946
LOC5567109	AAEL005832	Down	-0.15843	0.0378519	0.000802385
LOC5576107	AAEL002813	Down	-0.158684	0.0193354	0.000460513
LOC5577042	AAEL012964	Down	-0.158769	0.0340323	0.00205822
LOC5564787	AAEL004435	Down	-0.158933	0.055323	0.00379924
LOC5578794	AAEL003664	Down	-0.159076	0.0595724	0.00819836
LOC5577626	AAEL003210	Down	-0.159446	0.0330902	0.000292651
LOC5578796	AAEL003675	Down	-0.159557	0.0199801	0.000124705
LOC5578178	AAEL013790	Down	-0.159953	0.0813922	0.044991
LOC5571571	AAEL009160	Down	-0.160022	0.0316538	0.000150596
LOC5575152	AAEL029004	Down	-0.160032	0.0582838	0.00459908
LOC5568078	AAEL006509	Down	-0.160134	0.0168108	4.67087e-05
LOC5566137	AAEL005190	Down	-0.160489	0.0434723	0.00166187
LOC5568690	AAEL007065	Down	-0.16079	0.0270073	6.96408e-05
LOC5564296	AAEL014393	Down	-0.160931	0.0573891	0.00539892
LOC5578734	AAEL003661	Down	-0.161834	0.0393386	0.000518841
LOC5564392	AAEL004234	Down	-0.163395	0.0410549	0.000678163
LOC5570245	AAEL023182	Down	-0.163609	0.0798755	0.0435913
LOC5568261	AAEL006693	Down	-0.164641	0.0745547	0.0235953
LOC5572732	AAEL009995	Down	-0.165115	0.0782999	0.0337932
LOC5575432	AAEL011830	Down	-0.165695	0.0477892	0.00092237
LOC5571763	AAEL009287	Down	-0.167509	0.0342458	0.00159186
LOC5574369	AAEL011087	Down	-0.167611	0.0578342	0.0039992
LOC5573065	AAEL014511	Down	-0.167789	0.0494562	0.00210571
LOC5578271	AAEL003491	Down	-0.167888	0.0796434	0.0315937
LOC5565701	AAEL014944	Down	-0.16831	0.0142837	0.000173815
LOC5569672	AAEL007822	Down	-0.168893	0.0755421	0.0223955
LOC5567383	AAEL006061	Down	-0.16897	0.0457506	0.0012362
LOC5576217	AAEL029007	Down	-0.169288	0.0551723	0.00308209
LOC5578031	AAEL013466	Down	-0.169859	0.0732965	0.0217956
LOC5568880	AAEL007184	Down	-0.169879	0.0485218	0.00384381
LOC5579854	AAEL005856	Down	-0.170012	0.0686868	0.0105979
LOC5564078	AAEL014296	Down	-0.170393	0.0664582	0.0113977
LOC5569738	AAEL007868	Down	-0.171127	0.0224229	4.33194e-05
LOC110678949	AAEL022104	Down	-0.171255	0.0343595	0.0014369
LOC5565441	AAEL000641	Down	-0.171418	0.0273483	0.00114531
LOC5576214	AAEL002827	Down	-0.171448	0.0258854	0.00015253
LOC5574458	AAEL011180	Down	-0.17174	0.0149885	0.000416404
LOC5564809	AAEL014630	Down	-0.171864	0.046295	0.00112018
LOC5577021	AAEL012940	Down	-0.171882	0.0463808	0.00344728
LOC5564525	AAEL014492	Down	-0.172159	0.0530538	0.00200306
LOC5567097	AAEL005839	Down	-0.172288	0.0864854	0.0481904
LOC5565447	AAEL000677	Down	-0.172499	0.0748404	0.0153969
LOC5573433	AAEL010486	Down	-0.172555	0.0646286	0.00779844
LOC5576442	AAEL012528	Down	-0.1736	0.0849312	0.034793
LOC5569288	AAEL007547	Down	-0.174239	0.0850838	0.0477904
LOC5566228	AAEL005266	Down	-0.174513	0.00962484	0.000147642
LOC5575085	AAEL011641	Down	-0.174587	0.0314293	0.00040533
LOC5577470	AAEL027580	Down	-0.174779	0.0597148	0.00339932
LOC5578596	AAEL013778	Down	-0.17482	0.0902174	0.04999
LOC5570575	AAEL008394	Down	-0.175409	0.0416871	0.000625547
LOC5578234	AAEL013571	Down	-0.175453	0.0300493	0.000107888
LOC5564713	AAEL014583	Down	-0.176655	0.00900081	2.45053e-06
LOC5576139	AAEL022535	Down	-0.176689	0.0692741	0.0113977
LOC5565048	AAEL004567	Down	-0.176797	0.0545803	0.00227506
LOC5565432	AAEL021450	Down	-0.176858	0.0683606	0.0107978
LOC5566095	AAEL005163	Down	-0.176862	0.0672148	0.009998
LOC5566654	AAEL005508	Down	-0.176918	0.0479682	0.00143515
LOC5567447	AAEL006095	Down	-0.177173	0.0466491	0.00104852
LOC5578831	AAEL013875	Down	-0.178786	0.0261305	0.00112703
LOC5570022	AAEL000206	Down	-0.179426	0.0409181	0.000469879
LOC5572655	AAEL001837	Down	-0.179794	0.041291	0.000705056
LOC5573265	AAEL010360	Down	-0.180143	0.0929079	0.0481904
LOC5564379	AAEL014414	Down	-0.180407	0.0810928	0.0277944
LOC5578265	AAEL003493	Down	-0.181615	0.0909845	0.04999
LOC5579840	AAEL005843	Down	-0.181864	0.0717436	0.0131974
LOC5567581	AAEL006174	Down	-0.182147	0.0525477	0.0014842
LOC5565497	AAEL004818	Down	-0.182319	0.0859929	0.034793
LOC5569514	AAEL007702	Down	-0.182425	0.0423028	0.000198846
LOC5573443	AAEL010491	Down	-0.182557	0.0851118	0.0335933
LOC5573872	AAEL010787	Down	-0.182806	0.0146659	0.000176185
LOC5572478	AAEL009808	Down	-0.183078	0.0362275	0.000125371
LOC5565278	AAEL023512	Down	-0.18383	0.0746564	0.0129974
LOC5571844	AAEL001703	Down	-0.184005	0.0107084	0.00019767
LOC5569014	AAEL007288	Down	-0.184114	0.0918789	0.0443911
LOC5568862	AAEL007160	Down	-0.184114	0.0722092	0.0107978
LOC5566353	AAEL005336	Down	-0.184201	0.0569678	0.00259948
LOC5574741	AAEL011379	Down	-0.184229	0.0537631	0.0013863
LOC5567167	AAEL005897	Down	-0.184234	0.0531209	0.00158868
LOC5570237	AAEL008171	Down	-0.184281	0.078169	0.0187962
LOC5573763	AAEL000269	Down	-0.184366	0.013747	0.00029446
LOC5568266	AAEL006688	Down	-0.184811	0.0710742	0.0109978
LOC5563880	AAEL014198	Down	-0.185017	0.0558364	0.00304768
LOC5563646	AAEL021083	Down	-0.185236	0.00889499	0.000105537
LOC5563763	AAEL014252	Down	-0.185445	0.0644958	0.00339932
LOC5569077	AAEL001205	Down	-0.185501	0.0910592	0.0421916
LOC5569540	AAEL007717	Down	-0.185562	0.0625252	0.0029994
LOC5580034	AAEL010227	Down	-0.185752	0.0683159	0.00479904
LOC5575242	AAEL011711	Down	-0.186269	0.0239881	4.82876e-05
LOC5567286	AAEL005946	Down	-0.186309	0.0320781	0.000146603
LOC5568450	AAEL006863	Down	-0.186557	0.0542373	0.0013706
LOC5566986	AAEL005734	Down	-0.186792	0.0941604	0.04979
LOC5575922	AAEL012172	Down	-0.187576	0.0759069	0.0155969
LOC5573374	AAEL010464	Down	-0.188112	0.0230168	3.07385e-05
LOC110677182	-	Down	-0.188332	0.0115507	0.000257359
LOC5565230	AAEL004653	Down	-0.188395	0.0476922	0.000944174
LOC5576927	AAEL019449	Down	-0.18853	0.0961323	0.0471906
LOC5579109	AAEL003829	Down	-0.189159	0.0843838	0.0237952
LOC5570517	AAEL001439	Down	-0.189339	0.0824768	0.0229954
LOC5563708	AAEL003912	Down	-0.189358	0.0846173	0.0269946
LOC5569632	AAEL007777	Down	-0.190521	0.0286546	0.000109117
LOC5574929	AAEL011527	Down	-0.190645	0.0313027	0.000128323
LOC5573418	AAEL002083	Down	-0.190651	0.0271681	4.78665e-05
LOC5566251	AAEL015110	Down	-0.19072	0.0290732	6.11841e-05
LOC5575696	AAEL012010	Down	-0.190896	0.0295414	0.000144687
LOC5572191	AAEL009607	Down	-0.191047	0.0594994	0.00239952
LOC5569863	AAEL007945	Down	-0.19123	0.0228218	9.01062e-05
LOC5577406	AAEL003179	Down	-0.191463	0.0754328	0.00959808
LOC5564725	AAEL019855	Down	-0.19214	0.06933	0.00579884
LOC5573067	AAEL010248	Down	-0.192422	0.0871645	0.024795
LOC23687783	AAEL017363	Down	-0.192785	0.0888571	0.0283943
LOC5572646	AAEL001847	Down	-0.193135	0.0746398	0.010198
LOC5571039	AAEL008784	Down	-0.193285	0.020099	5.95972e-05
LOC5576894	AAEL003046	Down	-0.193461	0.0386961	6.44078e-05
LOC5569042	AAEL007332	Down	-0.193885	0.0823207	0.0187962
LOC5576673	AAEL026023	Down	-0.194768	0.0406092	0.000378147
LOC5570258	AAEL008220	Down	-0.194902	0.0776707	0.0165967
LOC5572296	AAEL001767	Down	-0.19555	0.0222509	0.000446361
LOC5568681	AAEL007033	Down	-0.196	0.0865263	0.0209958
LOC23687700	AAEL017280	Down	-0.196245	0.0886139	0.0313937
LOC5573191	AAEL001968	Down	-0.196949	0.0780232	0.0105979
LOC5572840	AAEL010063	Down	-0.197244	0.0543057	0.00157746
LOC5566009	AAEL005106	Down	-0.197386	0.0623812	0.00299685
LOC5567339	AAEL006012	Down	-0.197535	0.0935373	0.0343931
LOC5565279	AAEL014799	Down	-0.197621	0.0931152	0.0287942
LOC5572119	AAEL009539	Down	-0.197938	0.0461393	0.000438362
LOC5580330	AAEL013071	Down	-0.198203	0.0491618	0.000426067
LOC5572730	AAEL010004	Down	-0.198382	0.0660278	0.00339932
LOC5566520	AAEL005457	Down	-0.198586	0.0439386	0.000394901
LOC5574683	AAEL011323	Down	-0.198605	0.0514034	0.00141945
LOC23687811	AAEL017391	Down	-0.198957	0.0745163	0.00839832
LOC5572201	AAEL009603	Down	-0.199171	0.072038	0.00559888
LOC5567587	AAEL006186	Down	-0.199938	0.0521925	0.00100129
LOC5574704	AAEL011340	Down	-0.199982	0.0948482	0.0433913
LOC5571882	AAEL012134	Down	-0.200251	0.0875625	0.0265947
LOC5572581	AAEL009914	Down	-0.200318	0.078552	0.0109978
LOC5570792	AAEL008562	Down	-0.200819	0.0993012	0.0469906
LOC5574702	AAEL011343	Down	-0.200884	0.0607394	0.00253454
LOC23687393	AAEL016973	Down	-0.201227	0.079491	0.0139972
LOC5575512	AAEL011881	Down	-0.20168	0.0537697	0.000920818
LOC5580237	AAEL012323	Down	-0.201713	0.0965445	0.0337932
LOC5576493	AAEL019843	Down	-0.201871	0.0715961	0.00379924
LOC5573319	AAEL010403	Down	-0.20195	0.0636123	0.00271571
LOC5573964	AAEL010819	Down	-0.202658	0.0204546	4.72135e-05
LOC5564047	AAEL004071	Down	-0.202924	0.0263927	0.000972237
LOC5563919	AAEL001277	Down	-0.203207	0.0822573	0.0131974
LOC5574385	AAEL011090	Down	-0.203452	0.0457323	0.000921966
LOC5577291	AAEL013144	Down	-0.203646	0.0308664	0.000134386
LOC5574204	AAEL002295	Down	-0.203676	0.0279827	0.000103515
LOC5578595	AAEL013782	Down	-0.203807	0.0823288	0.0175965
LOC5567141	AAEL019742	Down	-0.204639	0.0849544	0.0161968
LOC5569083	AAEL001209	Down	-0.204881	0.0543023	0.00105578
LOC5565683	AAEL004920	Down	-0.20556	0.0960742	0.0253949
LOC5566074	AAEL015061	Down	-0.205786	0.0665835	0.00259948
LOC5578053	AAEL013490	Down	-0.205901	0.0549697	0.00119875
LOC5564545	AAEL004308	Down	-0.206128	0.061507	0.00232762
LOC5571677	AAEL001656	Down	-0.206224	0.071745	0.00379924
LOC5569078	AAEL001206	Down	-0.206328	0.0514986	0.000689509
LOC5573103	AAEL010284	Down	-0.206531	0.0762679	0.00559888
LOC5569750	AAEL007915	Down	-0.206632	0.0348916	0.000949046
LOC5576223	AAEL002825	Down	-0.206746	0.0291371	8.82454e-05
LOC5578117	AAEL003417	Down	-0.206901	0.0532035	0.000743357
LOC5574870	AAEL011478	Down	-0.207504	0.0314822	0.000941933
LOC5571898	AAEL009381	Down	-0.207601	0.099453	0.0391922
LOC5566596	AAEL000758	Down	-0.207909	0.063424	0.00199734
LOC5563787	AAEL003924	Down	-0.208016	0.0770251	0.00519896
LOC5571927	AAEL020290	Down	-0.208219	0.010023	1.70728e-06
LOC5576082	AAEL012312	Down	-0.20857	0.0478556	0.000644672
LOC5573121	AAEL001974	Down	-0.208718	0.0478249	0.000687489
LOC5577630	AAEL003234	Down	-0.20879	0.0162851	1.24192e-06
LOC5566421	AAEL019640	Down	-0.209027	0.0925564	0.0241952
LOC5571900	AAEL009377	Down	-0.20908	0.0810673	0.010198
LOC110675150	AAEL020753	Down	-0.209259	0.0833395	0.0123975
LOC5574420	AAEL019780	Down	-0.209692	0.0819563	0.010198
LOC5573732	AAEL000291	Down	-0.209799	0.0194253	6.74979e-06
LOC5577061	AAEL003103	Down	-0.210191	0.0329252	0.000891066
LOC5571453	AAEL009074	Down	-0.210303	0.0318947	0.000580477
LOC5564769	AAEL004438	Down	-0.210459	0.0552934	0.000979341
LOC5567918	AAEL006381	Down	-0.210551	0.0813744	0.0111978
LOC5576915	AAEL012866	Down	-0.210984	0.0568559	0.00141464
LOC5569076	AAEL001216	Down	-0.211286	0.0435966	0.000270938
LOC5577974	AAEL011554	Down	-0.211792	0.0852728	0.0131974
LOC5568296	AAEL006728	Down	-0.211824	0.10258	0.039992
LOC5566237	AAEL005276	Down	-0.212651	0.0887316	0.0193961
LOC23687646	AAEL017226	Down	-0.21274	0.0465104	0.000214941
LOC5579101	AAEL003842	Down	-0.212786	0.0901693	0.0155969
LOC5579820	AAEL005524	Down	-0.212848	0.0186096	1.76789e-05
LOC5566677	AAEL022387	Down	-0.212948	0.0555488	0.000847427
LOC5569988	AAEL008064	Down	-0.21392	0.0507261	0.00238693
LOC5568127	AAEL006550	Down	-0.214283	0.0661179	0.00246734
LOC5567605	AAEL021812	Down	-0.21463	0.0955862	0.0269946
LOC5570048	AAEL000191	Down	-0.214709	0.0601079	0.00136563
LOC5578832	AAEL013871	Down	-0.214789	0.0901973	0.0165967
LOC5566238	AAEL005261	Down	-0.21515	0.0961727	0.0281944
LOC5577026	AAEL012950	Down	-0.215177	0.0430194	0.000153855
LOC5570053	AAEL000204	Down	-0.215236	0.0403005	0.000307852
LOC5571558	AAEL009148	Down	-0.215565	0.0957133	0.0267946
LOC5574816	AAEL002464	Down	-0.215899	0.0242643	6.27926e-05
LOC5574515	AAEL019717	Down	-0.21595	0.0137688	0.000265277
LOC5576266	AAEL012419	Down	-0.216103	0.0701337	0.00328968
LOC5567853	AAEL006308	Down	-0.21613	0.0948792	0.025195
LOC5566799	AAEL005662	Down	-0.216374	0.0738351	0.00339932
LOC5572584	AAEL009909	Down	-0.216661	0.0704671	0.00349803
LOC5568205	AAEL006652	Down	-0.216695	0.0791062	0.00539892
LOC5570670	AAEL008490	Down	-0.216724	0.0303853	1.91266e-05
LOC5577613	AAEL003246	Down	-0.216896	0.0666858	0.00256228
LOC5576104	AAEL002777	Down	-0.217468	0.0886684	0.0145971
LOC5577113	AAEL008697	Down	-0.217788	0.0172193	0.000204299
LOC5571140	AAEL008854	Down	-0.217891	0.0616135	0.00137924
LOC5579012	AAEL003774	Down	-0.218174	0.0569901	0.00169881
LOC5573844	AAEL010778	Down	-0.218446	0.0611362	0.00129066
LOC5571067	AAEL008786	Down	-0.218511	0.0585414	0.00104946
LOC5564604	AAEL014529	Down	-0.218695	0.0829509	0.00639872
LOC5579484	AAEL015298	Down	-0.218715	0.083984	0.0129974
LOC5569281	AAEL007526	Down	-0.218932	0.0742008	0.00439912
LOC5565834	AAEL005032	Down	-0.219028	0.0931328	0.0189962
LOC5570509	AAEL001432	Down	-0.219464	0.0392852	8.32317e-05
LOC5570914	AAEL001479	Down	-0.219774	0.0485194	0.000199768
LOC5573437	AAEL010479	Down	-0.220191	0.0496201	0.000519339
LOC5576221	AAEL002833	Down	-0.220836	0.0418138	0.000117023
LOC5571580	AAEL009167	Down	-0.220905	0.0924552	0.0183963
LOC5570825	AAEL008599	Down	-0.221033	0.0383735	0.00104323
LOC5574282	AAEL011055	Down	-0.221948	0.0646694	0.00200382
LOC5575471	AAEL011848	Down	-0.222097	0.0653739	0.00236679
LOC5574555	AAEL011233	Down	-0.222165	0.0763597	0.0039992
LOC5567565	AAEL006169	Down	-0.222216	0.0403338	0.000270435
LOC5574978	AAEL002510	Down	-0.222579	0.0549516	0.000892833
LOC5574976	AAEL002501	Down	-0.223011	0.0501566	0.000511063
LOC5571703	AAEL009217	Down	-0.223029	0.095504	0.0219956
LOC5575971	AAEL012218	Down	-0.22351	0.066701	0.00159854
LOC5577919	AAEL003344	Down	-0.223517	0.0698856	0.00219648
LOC5565955	AAEL005052	Down	-0.22364	0.05388	0.000824097
LOC5574500	AAEL023902	Down	-0.223775	0.0729105	0.00339932
LOC5574353	AAEL002347	Down	-0.22384	0.0829874	0.00759848
LOC5568081	AAEL006516	Down	-0.223958	0.0464199	0.000229281
LOC5569124	AAEL007385	Down	-0.224003	0.0164818	2.33115e-05
LOC5573046	AAEL010224	Down	-0.224043	0.0943444	0.0213957
LOC5576587	AAEL002933	Down	-0.224053	0.0544275	0.000893282
LOC5572256	AAEL020559	Down	-0.224331	0.0830165	0.00779844
LOC5565266	AAEL004699	Down	-0.224389	0.0517619	0.000730796
LOC5580315	AAEL012897	Down	-0.224918	0.0364256	0.000870263
LOC5576975	AAEL003071	Down	-0.22572	0.0834329	0.00779844
LOC5564581	AAEL004347	Down	-0.225759	0.0460885	0.000335434
LOC5571415	AAEL009043	Down	-0.226037	0.084876	0.00779844
LOC5566793	AAEL026243	Down	-0.226174	0.0685107	0.00296893
LOC5570786	AAEL008565	Down	-0.226389	0.100487	0.0273945
LOC5576142	AAEL012337	Down	-0.226403	0.0630866	0.00159302
LOC5571387	AAEL009026	Down	-0.226443	0.0439435	0.000263004
LOC5573394	AAEL028141	Down	-0.227048	0.0459277	0.000198381
LOC5580074	AAEL002178	Down	-0.227135	0.0533982	0.000358721
LOC5574404	AAEL011116	Down	-0.227328	0.0288753	1.15681e-05
LOC5566081	AAEL005162	Down	-0.227823	0.0720441	0.00233919
LOC5567277	AAEL020992	Down	-0.228387	0.0740967	0.00259948
LOC5576054	AAEL013952	Down	-0.228484	0.0396352	0.000248537
LOC5565921	AAEL000703	Down	-0.228898	0.0943282	0.0157968
LOC5570913	AAEL001484	Down	-0.229284	0.0724699	0.0031712
LOC5569188	AAEL019609	Down	-0.229442	0.0898619	0.0103979
LOC5568708	AAEL007054	Down	-0.229559	0.027552	3.91184e-05
LOC23687579	AAEL019825	Down	-0.22964	0.085153	0.004999
LOC5572011	AAEL021276	Down	-0.22989	0.0543582	0.000666057
LOC5573710	AAEL019460	Down	-0.230563	0.0850676	0.00679864
LOC5570295	AAEL008232	Down	-0.230576	0.0434504	0.000404775
LOC5568194	AAEL006611	Down	-0.230623	0.0810862	0.00479904
LOC5572949	AAEL010171	Down	-0.230768	0.0566363	0.00242023
LOC5578146	AAEL013527	Down	-0.230832	0.0470735	0.000340646
LOC5575800	AAEL012078	Down	-0.23117	0.0428055	8.58475e-05
LOC5569502	AAEL007679	Down	-0.231968	0.0623089	0.00129838
LOC5575495	AAEL011870	Down	-0.232246	0.093437	0.0133973
LOC5565699	AAEL004931	Down	-0.232327	0.0561114	0.00100461
LOC5579043	AAEL013987	Down	-0.232493	0.0480499	0.000402582
LOC5573863	AAEL010765	Down	-0.232881	0.0285574	2.20003e-05
LOC5576362	AAEL002879	Down	-0.232964	0.0358718	6.0435e-05
LOC5571466	AAEL009101	Down	-0.233077	0.0257888	0.000736179
LOC5564487	AAEL004288	Down	-0.233322	0.0512144	0.000458682
LOC5566775	AAEL005638	Down	-0.233629	0.0315552	2.04341e-05
LOC5570788	AAEL008556	Down	-0.233783	0.0960359	0.0141972
LOC5574376	AAEL018211	Down	-0.234022	0.0811974	0.00559888
LOC5567494	AAEL000941	Down	-0.234161	0.0272177	6.82483e-05
LOC5572870	AAEL010090	Down	-0.235109	0.102418	0.0229954
LOC5564011	AAEL014272	Down	-0.235217	0.0410292	0.000118856
LOC5566610	AAEL027504	Down	-0.235407	0.0677364	0.00272111
LOC110679171	AAEL009684	Down	-0.235606	0.0613393	0.000943089
LOC5565883	AAEL019474	Down	-0.235987	0.0750546	0.00267433
LOC5575668	AAEL002687	Down	-0.236129	0.0507134	0.000337706
LOC5566678	AAEL005544	Down	-0.236345	0.0810481	0.00479904
LOC5575103	AAEL011657	Down	-0.236697	0.051443	0.000653376
LOC5570546	AAEL008369	Down	-0.237088	0.0871818	0.00759848
LOC5572548	AAEL009874	Down	-0.237536	0.0830959	0.00439912
LOC5564673	AAEL014557	Down	-0.23769	0.102015	0.0261948
LOC5571447	AAEL009088	Down	-0.237906	0.0526519	0.000526104
LOC5570461	AAEL008356	Down	-0.238146	0.078938	0.00339932
LOC5580010	AAEL009637	Down	-0.238239	0.0282494	0.000858593
LOC5567162	AAEL005914	Down	-0.238933	0.0734884	0.00272553
LOC5569212	AAEL019885	Down	-0.238995	0.0935122	0.0109978
LOC5565878	AAEL000679	Down	-0.23917	0.0370591	0.000144643
LOC5573818	AAEL010738	Down	-0.239206	0.0477623	0.00014778
LOC5569310	AAEL007549	Down	-0.239385	0.0233325	0.000110171
LOC5574834	AAEL011433	Down	-0.239465	0.0668007	0.00152568
LOC5564767	AAEL004448	Down	-0.239685	0.0774628	0.00299884
LOC5571878	AAEL009367	Down	-0.239966	0.0907687	0.00779844
LOC5567861	AAEL006317	Down	-0.24	0.0957261	0.0129974
LOC5568393	AAEL006762	Down	-0.240052	0.078836	0.00359928
LOC5577205	AAEL027164	Down	-0.240309	0.0759245	0.00239952
LOC5569782	AAEL007920	Down	-0.240593	0.0611583	0.00105409
LOC110679353	AAEL025697	Down	-0.240744	0.0409657	0.00015098
LOC5566901	AAEL000854	Down	-0.240989	0.0681033	0.00146615
LOC5573830	AAEL010754	Down	-0.241045	0.0147528	0.000255581
LOC5571889	AAEL009379	Down	-0.241245	0.0579679	0.000491158
LOC5568542	AAEL020205	Down	-0.242291	0.0558732	0.000729286
LOC5570233	AAEL008166	Down	-0.24258	0.0265805	7.56491e-06
LOC5571609	AAEL009201	Down	-0.242642	0.0159657	3.62229e-06
LOC5569504	AAEL018144	Down	-0.242681	0.0766618	0.00259948
LOC5572947	AAEL010170	Down	-0.24273	0.0709783	0.0040259
LOC5569016	AAEL007286	Down	-0.242791	0.0525736	0.00218917
LOC5574590	AAEL002416	Down	-0.242972	0.0705054	0.00130107
LOC5577777	AAEL003285	Down	-0.243535	0.0254726	8.30972e-05
LOC5577035	AAEL012943	Down	-0.243715	0.0779737	0.00314159
LOC5564272	AAEL014368	Down	-0.243754	0.0944235	0.0089982
LOC5565108	AAEL004586	Down	-0.244098	0.0550775	0.000438865
LOC5577025	AAEL012932	Down	-0.244392	0.0957267	0.00979804
LOC5572224	AAEL009658	Down	-0.245203	0.0666846	0.00108349
LOC5576263	AAEL019444	Down	-0.245752	0.0888626	0.0089982
LOC5573712	AAEL010697	Down	-0.245768	0.077645	0.00300564
LOC5572782	AAEL010047	Down	-0.245843	0.0838926	0.00359928
LOC5567139	AAEL005890	Down	-0.245854	0.0819085	0.0029994
LOC5569035	AAEL026700	Down	-0.245916	0.0682695	0.002217
LOC5564975	AAEL004511	Down	-0.246001	0.0992445	0.014997
LOC5571237	AAEL008924	Down	-0.246263	0.0739929	0.00207952
LOC5572651	AAEL001864	Down	-0.246325	0.0821762	0.00359928
LOC5572501	AAEL009829	Down	-0.246602	0.0905877	0.00559888
LOC5576121	AAEL002804	Down	-0.247084	0.0796662	0.00314369
LOC5571983	AAEL025906	Down	-0.247225	0.0862377	0.00459908
LOC5578123	AAEL003427	Down	-0.247317	0.00879337	1.2454e-08
LOC23687722	AAEL017302	Down	-0.247916	0.0489339	0.00165299
LOC5571141	AAEL019603	Down	-0.247974	0.050306	0.000253951
LOC110674749	AAEL027190	Down	-0.248399	0.0876501	0.00379924
LOC23687735	AAEL017315	Down	-0.248496	0.0439163	0.00146202
LOC5577966	AAEL013441	Down	-0.249157	0.0929071	0.00959808
LOC5570947	AAEL008679	Down	-0.249345	0.0713639	0.00472737
LOC110678610	AAEL020450	Down	-0.249613	0.077325	0.00368433
LOC5575162	AAEL000328	Down	-0.250172	0.0466807	0.000279888
LOC5573753	AAEL000270	Down	-0.25034	0.0860866	0.00379924
LOC5573117	AAEL001960	Down	-0.25059	0.0680501	0.00129148
LOC5564593	AAEL004327	Down	-0.250717	0.0926946	0.00679864
LOC5564732	AAEL004407	Down	-0.251031	0.0765073	0.0025128
LOC5577723	AAEL013359	Down	-0.251043	0.0132204	0.000158872
LOC5573755	AAEL000276	Down	-0.251051	0.0925819	0.00479904
LOC5575983	AAEL012233	Down	-0.251257	0.0371242	0.000139213
LOC5577364	AAEL000407	Down	-0.251617	0.0674955	0.00134856
LOC5569180	AAEL007444	Down	-0.252075	0.0159448	1.70585e-06
LOC5571785	AAEL009313	Down	-0.252094	0.0193755	0.000293786
LOC5563706	AAEL003921	Down	-0.252162	0.0741139	0.00165843
LOC5577327	AAEL000410	Down	-0.252856	0.0397822	0.00013227
LOC5577985	AAEL013461	Down	-0.252913	0.0981317	0.0111978
LOC23687495	AAEL017075	Down	-0.253029	0.0239468	2.68322e-05
LOC5573615	AAEL010611	Down	-0.253037	0.0265887	3.69058e-05
LOC5579456	AAEL019656	Down	-0.253062	0.0803639	0.00293595
LOC110676623	AAEL023684	Down	-0.253817	0.0897277	0.00519896
LOC5573994	AAEL010843	Down	-0.25393	0.0240943	5.36272e-05
LOC23687581	AAEL017161	Down	-0.254055	0.0917059	0.00759848
LOC5564130	AAEL004102	Down	-0.254149	0.0833384	0.00359928
LOC5576001	AAEL012243	Down	-0.254187	0.0718639	0.00193179
LOC5570078	AAEL018214	Down	-0.254201	0.0996138	0.0125975
LOC5572347	AAEL009733	Down	-0.254226	0.0422223	9.45218e-05
LOC110679174	AAEL025704	Down	-0.254632	0.094844	0.00679864
LOC5579150	AAEL014024	Down	-0.254634	0.073506	0.00522128
LOC5567722	AAEL021386	Down	-0.254764	0.0619516	0.000985399
LOC5565962	AAEL005220	Down	-0.254825	0.0101953	2.02649e-07
LOC5571418	AAEL009059	Down	-0.254934	0.0570736	0.000839781
LOC5576042	AAEL012279	Down	-0.255521	0.0604068	0.000637905
LOC5579901	AAEL001052	Down	-0.255787	0.0425764	6.69336e-05
LOC5570114	AAEL008079	Down	-0.256431	0.0205149	5.44032e-06
LOC5575492	AAEL011871	Down	-0.256821	0.0241527	1.69841e-05
LOC5577191	AAEL013076	Down	-0.256912	0.0848286	0.00249445
LOC5572925	AAEL010143	Down	-0.257125	0.0607988	0.000502171
LOC5567491	AAEL000951	Down	-0.257176	0.0131342	0.000178058
LOC5572627	AAEL009946	Down	-0.257864	0.0541147	0.000258334
LOC5573756	AAEL000297	Down	-0.258114	0.0715366	0.00147638
LOC5564337		Down	-0.258253	0.0640902	0.000998316
LOC5568764	AAEL010704	Down	-0.258505	0.0497594	0.00159511
LOC5573260	AAEL010359	Down	-0.258542	0.0544509	0.000173677
LOC5568854	AAEL007151	Down	-0.258593	0.0694495	0.00115979
LOC5568845	AAEL007153	Down	-0.258696	0.101026	0.0119976
LOC5575323	AAEL026160	Down	-0.258918	0.0896616	0.00339932
LOC5574790	AAEL002463	Down	-0.259087	0.0877483	0.00319936
LOC5569338	AAEL007546	Down	-0.259746	0.0407604	0.00110191
LOC23687484	AAEL017064	Down	-0.259824	0.0698187	0.00119835
LOC5574943	AAEL010453	Down	-0.259912	0.0687863	0.00101307
LOC23687536	AAEL017116	Down	-0.259942	0.0363173	0.000750905
LOC5574862	AAEL011468	Down	-0.260772	0.0242201	1.97062e-05
LOC5568998	AAEL025594	Down	-0.261133	0.0694443	0.00112094
LOC5576802	AAEL018249	Down	-0.261354	0.0721163	0.00099569
LOC5570234	AAEL008179	Down	-0.261615	0.0831505	0.0031311
LOC5568714	AAEL007042	Down	-0.261745	0.0472886	0.00023682
LOC5568801	AAEL001190	Down	-0.261864	0.0811848	0.00224208
LOC5564916	AAEL014657	Down	-0.261977	0.0613008	0.000531721
LOC5571015	AAEL008742	Down	-0.262348	0.0923343	0.00639872
LOC5579902	AAEL001044	Down	-0.262836	0.0571001	0.000301834
LOC5580194	AAEL002539	Down	-0.263003	0.0436296	0.00010129
LOC5572195	AAEL014715	Down	-0.263386	0.0390579	8.56391e-05
LOC5580021	AAEL009646	Down	-0.263429	0.0489925	0.000142578
LOC5566935	AAEL005709	Down	-0.263561	0.0923698	0.00439912
LOC5571783	AAEL009320	Down	-0.263648	0.0574767	0.000425821
LOC5565253	AAEL004688	Down	-0.263966	0.0622725	0.000711482
LOC5576629	AAEL012658	Down	-0.264776	0.0506888	0.000116456
LOC5570147	AAEL008128	Down	-0.264997	0.0386004	0.000148129
LOC5566763	AAEL012410	Down	-0.265075	0.082824	0.00259948
LOC5570809	AAEL008582	Down	-0.265141	0.077549	0.00139432
LOC5572903	AAEL010116	Down	-0.265675	0.0784794	0.00220032
LOC5566651	AAEL005500	Down	-0.265881	0.0693022	0.000748826
LOC5571645	AAEL001636	Down	-0.265902	0.0735847	0.00146632
LOC5575372	AAEL011776	Down	-0.265969	0.093386	0.004999
LOC5579796	AAEL003976	Down	-0.266168	0.0639471	0.000654193
LOC5576650	AAEL012684	Down	-0.266334	0.0232425	5.29907e-05
LOC5575273	AAEL011742	Down	-0.266702	0.0338121	1.26764e-05
LOC5565520	AAEL014871	Down	-0.266771	0.0960196	0.00559888
LOC5568465	AAEL006860	Down	-0.267	0.0104425	0.000136045
LOC5571930	AAEL009389	Down	-0.267014	0.0510349	0.000431685
LOC5567100	AAEL005830	Down	-0.267412	0.0695581	0.00084852
LOC5565756	AAEL004997	Down	-0.267529	0.0674109	0.000721292
LOC5567495	AAEL000934	Down	-0.267707	0.0521266	0.000282463
LOC5565652	AAEL004902	Down	-0.267819	0.0505772	0.00152757
LOC5572845	AAEL010057	Down	-0.268585	0.0943289	0.00419916
LOC5571262	AAEL001569	Down	-0.26898	0.0587482	0.000375597
LOC5578082	AAEL003423	Down	-0.269133	0.0256316	1.21076e-06
LOC5564061	AAEL004043	Down	-0.269394	0.0979149	0.00719856
LOC5577765	AAEL003309	Down	-0.270367	0.027992	1.51142e-05
LOC5568096	AAEL006510	Down	-0.271025	0.0905372	0.00339932
LOC5565474	AAEL002495	Down	-0.271041	0.0197834	0.000142298
LOC5569936	AAEL008025	Down	-0.271559	0.0608365	0.000623084
LOC5576612	AAEL012636	Down	-0.271661	0.0972815	0.00459908
LOC110676550	AAEL027436	Down	-0.271671	0.0911173	0.00279944
LOC5568012	AAEL006464	Down	-0.271821	0.0977978	0.00659868
LOC5571932	AAEL009387	Down	-0.271833	0.0418301	0.000215292
LOC23687965	AAEL017545	Down	-0.27184	0.0585206	0.000277191
LOC5566973	AAEL005728	Down	-0.271871	0.0910069	0.00319936
LOC5578748	AAEL003670	Down	-0.272202	0.0834386	0.00272909
LOC5567419	AAEL006066	Down	-0.272295	0.0658946	0.00102007
LOC5580095	AAEL002137	Down	-0.272567	0.0692501	0.000822785
LOC5570614	AAEL008431	Down	-0.272727	0.0807568	0.00282139
LOC5572504	AAEL009833	Down	-0.273573	0.0952696	0.00279944
LOC5580070	AAEL002160	Down	-0.273774	0.0367173	0.00015222
LOC5571789	AAEL009317	Down	-0.273967	0.0460841	0.000125038
LOC5573948	AAEL002183	Down	-0.274055	0.0332634	0.000115842
LOC5579176	AAEL019783	Down	-0.274587	0.0905006	0.0029994
LOC5573998	AAEL010834	Down	-0.274872	0.0675173	0.000712626
LOC5574000	AAEL010844	Down	-0.275336	0.0972693	0.00539892
LOC5569564	AAEL025134	Down	-0.275363	0.0476288	0.000112816
LOC5574338	AAEL002334	Down	-0.27561	0.0282005	2.83175e-05
LOC5580260	AAEL012586	Down	-0.275922	0.0876801	0.00275572
LOC5566877	AAEL000811	Down	-0.276301	0.0880162	0.00239952
LOC5574055	AAEL010895	Down	-0.276759	0.0770415	0.000762126
LOC5578311	AAEL008084	Down	-0.276831	0.0511241	0.000275979
LOC5572519	AAEL009847	Down	-0.277144	0.0339463	0.0005183
LOC5573804	AAEL010727	Down	-0.2773	0.0749187	0.00120918
LOC5568748	AAEL007084	Down	-0.278161	0.0788553	0.00133671
LOC5575813	AAEL012069	Down	-0.278175	0.0396114	5.01875e-05
LOC5574975	AAEL002526	Down	-0.278302	0.0274275	2.79086e-05
LOC5577366	AAEL000418	Down	-0.278432	0.0964276	0.004999
LOC5568367	AAEL001092	Down	-0.27855	0.0480009	0.00100745
LOC5567414	AAEL025199	Down	-0.279212	0.0883841	0.00314201
LOC5567110	AAEL027459	Down	-0.280883	0.0877659	0.00359928
LOC5567126	AAEL005879	Down	-0.28097	0.0732526	0.000939082
LOC5566214	AAEL005277	Down	-0.28099	0.0879005	0.00235434
LOC5571584	AAEL009169	Down	-0.281334	0.0709836	0.000705297
LOC5565121	AAEL014732	Down	-0.281394	0.091832	0.00279944
LOC5576472	AAEL002886	Down	-0.281707	0.0297468	2.75251e-05
LOC5565700	AAEL004930	Down	-0.282352	0.0158353	0.000239954
LOC5572805	AAEL001900	Down	-0.282692	0.071503	0.000906062
LOC5575781	AAEL002703	Down	-0.282742	0.0633432	0.000628127
LOC5574958	AAEL011560	Down	-0.283459	0.0964378	0.00319936
LOC5574178	AAEL019806	Down	-0.283608	0.04282	3.44785e-05
LOC5577450	AAEL013197	Down	-0.283927	0.0443099	3.80814e-05
LOC5568784	AAEL007135	Down	-0.284134	0.036107	0.000521411
LOC5570396	AAEL008291	Down	-0.284574	0.0686245	0.000582877
LOC5570462	AAEL022661	Down	-0.284767	0.0613103	0.000597711
LOC5577369	AAEL000454	Down	-0.284833	0.0336543	4.11071e-05
LOC5574382	AAEL011099	Down	-0.285544	0.0403289	0.000105452
LOC5566028	AAEL005127	Down	-0.285789	0.0839502	0.00135947
LOC5573328	AAEL010411	Down	-0.285873	0.0536006	0.00026017
LOC5564065	AAEL004081	Down	-0.286117	0.0630209	0.000375306
LOC110678983	AAEL025807	Down	-0.286182	0.0329432	0.000448716
LOC5573489	AAEL014505	Down	-0.286268	0.0375083	2.24401e-05
LOC5566526	AAEL005454	Down	-0.286314	0.0824418	0.00251675
LOC5576029	AAEL012262	Down	-0.28643	0.0468486	3.45447e-05
LOC5564793	AAEL004436	Down	-0.286784	0.0567473	0.000322841
LOC5567091	AAEL012313	Down	-0.286926	0.0567564	0.000251301
LOC5577095	AAEL012994	Down	-0.287351	0.056931	0.000213916
LOC5572383	AAEL009772	Down	-0.288177	0.0490956	0.000114396
LOC5567500	AAEL006117	Down	-0.288301	0.0542637	0.000166742
LOC5577910	AAEL003352	Down	-0.288306	0.0378078	0.000732627
LOC5564027	AAEL014281	Down	-0.288338	0.0957598	0.00259948
LOC5569119	AAEL007382	Down	-0.289039	0.0742969	0.00126464
LOC5574279	AAEL011048	Down	-0.28928	0.0937487	0.00395482
LOC5564577	AAEL004335	Down	-0.289923	0.0854309	0.00147863
LOC5572601	AAEL009932	Down	-0.290656	0.0552663	0.00016734
LOC5570930	AAEL008672	Down	-0.291098	0.0639861	0.00059662
LOC5578565	AAEL013752	Down	-0.292416	0.0862415	0.00198605
LOC5566687	AAEL005558	Down	-0.292923	0.0303698	6.47853e-05
LOC5579514	AAEL015100	Down	-0.292972	0.0628019	0.000305809
LOC5573116	AAEL002031	Down	-0.293147	0.0615897	0.000303662
LOC5579263	AAEL011873	Down	-0.293208	0.0477156	8.04766e-05
LOC110676690	AAEL009150	Down	-0.293499	0.0745117	0.000923048
LOC5566532	AAEL015202	Down	-0.2941	0.0513811	5.87141e-05
LOC5565841	AAEL005043	Down	-0.294321	0.093438	0.00259948
LOC5568418	AAEL006847	Down	-0.294395	0.0909075	0.00199583
LOC5572308	AAEL009700	Down	-0.294442	0.0391938	0.000103061
LOC5576010	AAEL012238	Down	-0.294671	0.0359819	0.000577768
LOC5569700	AAEL007845	Down	-0.294685	0.0397323	0.000128091
LOC5580068	AAEL002163	Down	-0.29473	0.0815687	0.00123209
LOC5564636	AAEL004378	Down	-0.294737	0.0262634	2.00393e-05
LOC5565106	AAEL028047	Down	-0.294857	0.0938315	0.0029994
LOC110681159	AAEL021894	Down	-0.295001	0.08736	0.0018788
LOC23687805	AAEL017385	Down	-0.295674	0.0759936	0.000886863
LOC5568843	AAEL007162	Down	-0.295712	0.0266605	1.93851e-06
LOC5567698	AAEL006264	Down	-0.296407	0.0643454	0.00043892
LOC5577289	AAEL013139	Down	-0.296646	0.0249909	1.00288e-05
LOC5576996	AAEL003056	Down	-0.296912	0.0294118	2.01515e-05
LOC5578443	AAEL000485	Down	-0.297079	0.0828729	0.00168699
LOC5570826	AAEL008609	Down	-0.297941	0.0406468	0.000222049
LOC5578893	AAEL013898	Down	-0.298141	0.0897786	0.00224655
LOC23687737	AAEL017317	Down	-0.298278	0.0615326	0.00022535
LOC5575641	AAEL011974	Down	-0.298551	0.0691257	0.00274511
LOC5569237	AAEL026565	Down	-0.298898	0.0149987	0.000183718
LOC5568491	AAEL006904	Down	-0.29914	0.0592401	0.00049868
LOC5579106	AAEL003847	Down	-0.299814	0.078364	0.00184317
LOC110675810	AAEL009183	Down	-0.299833	0.0663292	0.000194127
LOC5576046	AAEL014932	Down	-0.299855	0.0168883	0.000188738
LOC5577945	AAEL019754	Down	-0.300757	0.0735351	0.000973616
LOC5565783	AAEL004985	Down	-0.301795	0.0736181	0.000969581
LOC5568658	AAEL007001	Down	-0.301859	0.0560738	8.16224e-05
LOC5578267	AAEL003492	Down	-0.301923	0.0221451	4.1743e-06
LOC5563575	AAEL000080	Down	-0.301927	0.0838581	0.00115683
LOC23687505	AAEL017085	Down	-0.302009	0.0906247	0.00218575
LOC5565066	AAEL004580	Down	-0.302506	0.0898165	0.00223896
LOC5570335	AAEL019669	Down	-0.302633	0.0246632	4.73817e-05
LOC5579472	AAEL007650	Down	-0.303037	0.0534261	9.68079e-05
LOC5564584	AAEL004338	Down	-0.30305	0.046435	4.79331e-05
LOC5577545	AAEL013249	Down	-0.303429	0.0626702	0.000182587
LOC5569141	AAEL007390	Down	-0.303456	0.0668401	0.000251639
LOC5567821	AAEL000986	Down	-0.303726	0.0297714	4.05176e-05
LOC5567637	AAEL006224	Down	-0.303762	0.0515141	0.000517007
LOC5575684	AAEL011995	Down	-0.304432	0.065657	0.000339025
LOC5567161	AAEL005900	Down	-0.304469	0.0483941	0.00129468
LOC5569539	AAEL007713	Down	-0.304629	0.0754071	0.00088289
LOC5576744	AAEL024536	Down	-0.304945	0.00934604	3.43213e-07
LOC5571047	AAEL008768	Down	-0.305774	0.0331041	1.45894e-05
LOC5568636	AAEL006990	Down	-0.305782	0.0695639	0.000758542
LOC5570616	AAEL008434	Down	-0.305841	0.0377685	5.22628e-05
LOC5578431	AAEL000516	Down	-0.306809	0.0535312	0.000159919
LOC5567305	AAEL005956	Down	-0.307104	0.0877775	0.00155137
LOC5568553	AAEL001109	Down	-0.307378	0.0584795	0.000154293
LOC5568618	AAEL006977	Down	-0.307768	0.0551892	0.000270761
LOC5568098	AAEL006560	Down	-0.307931	0.080594	0.00085938
LOC5564923	AAEL004496	Down	-0.308016	0.073724	0.000470565
LOC5568743	AAEL007092	Down	-0.308238	0.0811601	0.000959616
LOC5573583	AAEL002130	Down	-0.308498	0.0432473	2.67021e-05
LOC5567921	AAEL006382	Down	-0.308608	0.0931437	0.00521562
LOC5571107	AAEL001526	Down	-0.3094	0.0801149	0.00124103
LOC5564225	AAEL023037	Down	-0.309476	0.0595728	0.000239313
LOC5564039	AAEL004065	Down	-0.309546	0.0430254	3.39363e-05
LOC5572115	AAEL009530	Down	-0.309652	0.0879109	0.00111531
LOC5570014	AAEL000179	Down	-0.309893	0.073297	0.000619344
LOC5570821	AAEL008594	Down	-0.310498	0.0508232	2.52421e-05
LOC5570780	AAEL008543	Down	-0.310636	0.044896	0.000112406
LOC5579190	AAEL003899	Down	-0.310825	0.0339778	1.58973e-05
LOC5580100	AAEL002140	Down	-0.311044	0.0430388	5.97942e-05
LOC5576864	AAEL012845	Down	-0.31106	0.0846625	0.00171494
LOC5564399	AAEL004227	Down	-0.311454	0.0340614	0.000430806
LOC5569214	AAEL007473	Down	-0.311665	0.0703721	0.00065644
LOC5573623	AAEL010602	Down	-0.312165	0.0817814	0.000808162
LOC5577267	AAEL013119	Down	-0.312371	0.0761465	0.000833089
LOC5577268	AAEL013128	Down	-0.312637	0.069796	0.00158262
LOC5572538	AAEL009862	Down	-0.31372	0.068346	7.78675e-05
LOC5574609	AAEL008686	Down	-0.314139	0.0850358	0.00173034
LOC5576737	AAEL002978	Down	-0.314385	0.0519025	0.000169502
LOC5576391	AAEL014891	Down	-0.314406	0.0981569	0.00271055
LOC5569749	AAEL007874	Down	-0.314498	0.0746992	0.000676538
LOC5578582	AAEL013768	Down	-0.314887	0.0696273	0.00052762
LOC5566059	AAEL005143	Down	-0.315008	0.0203068	1.08183e-05
LOC5571296	AAEL001549	Down	-0.315147	0.0769103	0.000679991
LOC5579903	AAEL001022	Down	-0.315186	0.0666953	0.000637064
LOC5572427	AAEL001816	Down	-0.315198	0.055641	0.000273871
LOC5568502	AAEL019567	Down	-0.315248	0.0704372	0.000537934
LOC5575223	AAEL010608	Down	-0.315355	0.050074	3.23458e-05
LOC5567928	AAEL006364	Down	-0.315507	0.0592949	7.60722e-05
LOC5575475	AAEL021703	Down	-0.315916	0.0520018	0.000135026
LOC5579927	AAEL006815	Down	-0.316171	0.0786874	0.000992051
LOC5575898	AAEL002737	Down	-0.316173	0.016347	0.000197006
LOC5564185	AAEL014335	Down	-0.316278	0.0734076	0.000382818
LOC5569682	AAEL007826	Down	-0.316438	0.0742205	0.000684557
LOC5575522	AAEL011898	Down	-0.316855	0.0614201	0.00152498
LOC5573501	AAEL022033	Down	-0.316866	0.0383691	0.000120652
LOC5567118	AAEL015304	Down	-0.317846	0.0572719	0.000105485
LOC5580031	AAEL009647	Down	-0.317928	0.0861578	0.00166982
LOC5575837	AAEL012094	Down	-0.318039	0.0568604	0.000168072
LOC5575702	AAEL012016	Down	-0.318077	0.0655506	0.000238745
LOC5569168	AAEL007432	Down	-0.31821	0.125621	0.0123975
LOC23687632	AAEL017212	Down	-0.318688	0.0273821	1.88365e-05
LOC5579996	AAEL025915	Down	-0.319405	0.0482034	0.000173294
LOC5569121	AAEL021748	Down	-0.319762	0.0989604	0.00259079
LOC5577023	AAEL012939	Down	-0.319775	0.0344053	0.000315314
LOC5571596	AAEL009185	Down	-0.31996	0.0206642	6.98024e-06
LOC5571500	AAEL001623	Down	-0.321	0.0275544	9.36288e-07
LOC5564589	AAEL004345	Down	-0.321051	0.0858067	0.00130837
LOC5578303	AAEL013613	Down	-0.321271	0.0715536	0.000668796
LOC5580117	AAEL022296	Down	-0.321865	0.0917152	0.00133917
LOC110677933	AAEL027357	Down	-0.322214	0.0391258	4.32955e-05
LOC5570534	AAEL001421	Down	-0.322496	0.0572607	0.00021941
LOC5573878	AAEL010799	Down	-0.322919	0.0275649	1.27661e-05
LOC5569575	AAEL007765	Down	-0.32293	0.0336563	0.000121183
LOC5568499	AAEL006915	Down	-0.323103	0.0890153	0.00121269
LOC5570218	AAEL008153	Down	-0.323563	0.078157	0.00053437
LOC5571685	AAEL009214	Down	-0.323587	0.020089	2.6882e-06
LOC5572799	AAEL001904	Down	-0.32438	0.0572209	9.74672e-05
LOC5571011	AAEL008736	Down	-0.324806	0.0621907	0.000352118
LOC5569333	AAEL007555	Down	-0.325144	0.0782239	0.0003544
LOC5569466	AAEL007662	Down	-0.325181	0.0549782	7.21546e-05
LOC5571745	AAEL009275	Down	-0.32541	0.0366084	5.23241e-05
LOC5565647	AAEL004913	Down	-0.325587	0.0829774	0.000568662
LOC5578104	AAEL003428	Down	-0.325722	0.0441191	0.000115337
LOC5573336	AAEL010405	Down	-0.325868	0.0849579	0.0011531
LOC5572372	AAEL009760	Down	-0.327009	0.0179899	0.00021068
LOC5576007	AAEL021113	Down	-0.327184	0.0860669	0.000495521
LOC5575715	AAEL012026	Down	-0.327224	0.02701	4.02323e-06
LOC5565981	AAEL005092	Down	-0.327869	0.096579	0.00407241
LOC5566942	AAEL005535	Down	-0.328439	0.0830452	0.00125392
LOC5578144	AAEL013521	Down	-0.328473	0.0722784	0.000735068
LOC23687928	AAEL017508	Down	-0.328503	0.0783704	0.000151289
LOC5571304	AAEL008953	Down	-0.328727	0.0404862	8.56413e-05
LOC5577999	AAEL003393	Down	-0.329513	0.0201683	1.43745e-06
LOC5568717	AAEL007043	Down	-0.329978	0.0500228	0.00013898
LOC5564249	AAEL004195	Down	-0.330411	0.0520447	9.96678e-05
LOC5576099	AAEL002781	Down	-0.330733	0.0689801	0.000124382
LOC5574542	AAEL011216	Down	-0.331089	0.0701124	0.000342399
LOC5577355	AAEL000458	Down	-0.331586	0.0277653	6.68902e-06
LOC5568342	AAEL001065	Down	-0.331733	0.0836256	0.00115995
LOC5573704	AAEL010698	Down	-0.332076	0.0864257	0.000928303
LOC5572156	AAEL009561	Down	-0.332542	0.0452671	3.77824e-05
LOC5574383	AAEL011102	Down	-0.333241	0.0352463	5.70648e-06
LOC5565848	AAEL005038	Down	-0.333405	0.0586925	0.000235274
LOC5569745	AAEL007883	Down	-0.333555	0.0278647	7.6484e-06
LOC5570312	AAEL008249	Down	-0.333938	0.040231	4.72141e-06
LOC5575848	AAEL012113	Down	-0.334489	0.0282537	5.21298e-06
LOC5576360	AAEL002860	Down	-0.334531	0.044426	3.68899e-05
LOC5572753	AAEL010018	Down	-0.335017	0.0362508	0.000375331
LOC5567222	AAEL019724	Down	-0.335195	0.0881724	0.00115453
LOC5570553	AAEL008374	Down	-0.335419	0.0894707	0.00105889
LOC5578686	AAEL003634	Down	-0.335438	0.0612015	0.000282434
LOC5571735	AAEL009257	Down	-0.33552	0.0166126	0.000191873
LOC5565148	AAEL004620	Down	-0.335771	0.0742658	0.000666282
LOC5576917	AAEL012860	Down	-0.336155	0.0295108	2.29152e-05
LOC5570653	AAEL008461	Down	-0.336202	0.0328808	0.000302783
LOC5564962	AAEL014889	Down	-0.336614	0.0364932	0.000384785
LOC5572735	AAEL010012	Down	-0.33664	0.0327516	4.05574e-05
LOC5573061	AAEL010245	Down	-0.337228	0.0944372	0.00160203
LOC5571939	AAEL009420	Down	-0.337357	0.070664	0.000160709
LOC5574180	AAEL002304	Down	-0.337738	0.0739593	0.000464814
LOC5573523	AAEL024184	Down	-0.337895	0.080953	0.000498008
LOC5570063	AAEL001354	Down	-0.338101	0.0560983	0.000125052
LOC5572923	AAEL010146	Down	-0.338324	0.0982508	0.00270083
LOC5566551	AAEL005471	Down	-0.338452	0.0207442	1.23875e-06
LOC5568149	AAEL006587	Down	-0.338513	0.0914387	0.00163631
LOC5563644	AAEL000077	Down	-0.3387	0.0692708	0.000185893
LOC5576069	AAEL026118	Down	-0.338843	0.0348731	0.000303872
LOC5579951	AAEL006786	Down	-0.339043	0.0428422	0.000665041
LOC5570433	AAEL019748	Down	-0.339575	0.0481116	0.000846518
LOC5575082	AAEL011627	Down	-0.339709	0.0753665	0.000415406
LOC5578960	AAEL013939	Down	-0.340114	0.0795206	0.000493938
LOC5576950	AAEL012904	Down	-0.340589	0.052725	9.14545e-05
LOC5563589	AAEL000090	Down	-0.341541	0.0563538	8.58612e-05
LOC5577272	AAEL013121	Down	-0.341553	0.0818123	0.000410683
LOC5572023	AAEL000219	Down	-0.341643	0.0407253	7.57486e-05
LOC5572004	AAEL009477	Down	-0.341651	0.0675644	0.00109462
LOC5579187	AAEL003873	Down	-0.342136	0.0640328	0.000198141
LOC110676327	AAEL027034	Down	-0.342344	0.0770951	0.000207106
LOC5576934	AAEL012875	Down	-0.342999	0.0609701	0.00012278
LOC5566110	AAEL005179	Down	-0.343194	0.0267376	2.51556e-05
LOC5572284	AAEL001759	Down	-0.343381	0.00959735	8.00056e-05
LOC5567705	AAEL006279	Down	-0.344274	0.0849265	0.000598876
LOC5573372	AAEL010467	Down	-0.344816	0.0494696	6.67944e-05
LOC5567259	AAEL005931	Down	-0.345694	0.0803177	0.000528046
LOC5579505	AAEL015136	Down	-0.345975	0.0682475	0.000330876
LOC5566724	AAEL005605	Down	-0.346454	0.0970977	0.00133714
LOC5571228	AAEL008931	Down	-0.347387	0.0602752	0.000132915
LOC5568668	AAEL007022	Down	-0.34739	0.0781912	0.000668925
LOC5573885	AAEL010798	Down	-0.347434	0.0415099	4.17879e-05
LOC5567531	AAEL027977	Down	-0.347497	0.0559728	0.000100046
LOC5569898	AAEL008002	Down	-0.34825	0.0330324	4.5054e-05
LOC5568526	AAEL006946	Down	-0.348257	0.052498	4.62372e-05
LOC5577094	AAEL012996	Down	-0.349045	0.0518786	0.00105451
LOC5572043	AAEL000234	Down	-0.349172	0.0711182	0.00207238
LOC5565718	AAEL014959	Down	-0.349457	0.073431	0.000157281
LOC5568696	AAEL007050	Down	-0.349752	0.0423792	3.58415e-05
LOC5577316	AAEL013163	Down	-0.349783	0.0410968	3.47252e-05
LOC5573060	AAEL010244	Down	-0.350533	0.0529403	0.000148726
LOC5580278	AAEL003011	Down	-0.351286	0.0331199	3.87421e-05
LOC5564753	AAEL006811	Down	-0.351347	0.0959704	0.00107376
LOC5573407	AAEL002077	Down	-0.351557	0.0803331	0.000782024
LOC5569798	AAEL001314	Down	-0.351791	0.0544487	9.43106e-05
LOC5565857	AAEL005046	Down	-0.352325	0.0873687	0.000977586
LOC5574333	AAEL002337	Down	-0.353205	0.0574794	0.000266542
LOC5577559	AAEL020960	Down	-0.353515	0.0984446	0.00136588
LOC5578089	AAEL003434	Down	-0.353688	0.0404065	3.23838e-05
LOC5570115	AAEL008080	Down	-0.353881	0.0446628	9.19718e-05
LOC5571825	AAEL001698	Down	-0.354006	0.0578083	7.54967e-05
LOC5573696	AAEL010684	Down	-0.354311	0.0913116	0.00125919
LOC5568211	AAEL006642	Down	-0.354618	0.028329	3.9909e-05
LOC5569674	AAEL007820	Down	-0.354629	0.067699	0.000182831
LOC5567660	AAEL012740	Down	-0.355353	0.011303	1.68309e-07
LOC5575135	AAEL000330	Down	-0.355814	0.0605994	0.000171682
LOC5573556	AAEL027408	Down	-0.3562	0.0478134	0.000843009
LOC5571755	AAEL009278	Down	-0.356275	0.0483061	6.94994e-05
LOC110680525	AAEL011755	Down	-0.356416	0.0845254	0.000708783
LOC5577389	AAEL000468	Down	-0.35697	0.0928039	0.000993356
LOC5569767	AAEL007893	Down	-0.35732	0.0588272	0.000223129
LOC5575914	AAEL012175	Down	-0.357617	0.01841	0.000207269
LOC5571502	AAEL001601	Down	-0.357815	0.0991491	0.000694674
LOC5574141	AAEL010955	Down	-0.358049	0.0849974	0.000289141
LOC5570951	AAEL008674	Down	-0.358107	0.0563374	6.9907e-05
LOC5571226	AAEL008921	Down	-0.358207	0.0364918	0.000123352
LOC5570276	AAEL008216	Down	-0.358284	0.0755652	0.00047437
LOC5577227	AAEL003130	Down	-0.358617	0.0478164	2.82518e-05
LOC5571397	AAEL009029	Down	-0.358677	0.0690878	0.000224574
LOC5572982	AAEL001930	Down	-0.358679	0.0579949	0.00030692
LOC5568054	AAEL006480	Down	-0.358941	0.0576439	8.61127e-05
LOC5575108	AAEL011665	Down	-0.35896	0.0530826	0.000109856
LOC5565050	AAEL004546	Down	-0.358975	0.0721768	0.000306841
LOC5564744	AAEL024186	Down	-0.359006	0.0832184	0.000700512
LOC5565922	AAEL000709	Down	-0.359464	0.0720743	0.000237326
LOC5566751	AAEL015238	Down	-0.359757	0.0450587	1.5709e-05
LOC5569013	AAEL007298	Down	-0.360395	0.0432488	7.37827e-05
LOC5567367	AAEL006025	Down	-0.360642	0.0790013	0.00187867
LOC5565270	AAEL004691	Down	-0.360872	0.0350991	0.000382526
LOC5566119	AAEL022497	Down	-0.361211	0.0458874	2.26891e-05
LOC5569049	AAEL007342	Down	-0.361692	0.0185519	0.000155466
LOC5565618	AAEL021782	Down	-0.361778	0.0447169	2.82396e-05
LOC5564874	AAEL004460	Down	-0.362074	0.0240063	4.28215e-05
LOC5570797	AAEL008588	Down	-0.362124	0.0363789	0.000339451
LOC5567961	AAEL006420	Down	-0.362612	0.068159	0.00055307
LOC5566371	AAEL005364	Down	-0.362752	0.0856142	0.000413887
LOC5564976	AAEL004532	Down	-0.362798	0.0547128	0.000105426
LOC5578009	AAEL003384	Down	-0.362829	0.0873664	0.000725699
LOC5572463	AAEL001798	Down	-0.362843	0.0486504	0.000109374
LOC5566265	AAEL023348	Down	-0.362854	0.0745363	0.000311652
LOC5569522	AAEL007705	Down	-0.363355	0.0803795	0.000303294
LOC110674038		Down	-0.363523	0.0948382	0.00132556
LOC5574348	AAEL002350	Down	-0.363675	0.0515659	0.000113588
LOC5567964	AAEL006425	Down	-0.3639	0.019175	9.39124e-05
LOC5579807	AAEL003954	Down	-0.364124	0.0348312	3.41491e-05
LOC5571997	AAEL009487	Down	-0.364159	0.0543568	2.50587e-05
LOC5572448	AAEL001800	Down	-0.364344	0.0849779	0.000414192
LOC5564161	AAEL004148	Down	-0.364395	0.0443485	0.000103272
LOC5572242	AAEL009671	Down	-0.364515	0.0847549	0.000474946
LOC5579795	AAEL003957	Down	-0.365282	0.0242199	2.58881e-06
LOC5573868	AAEL010794	Down	-0.365476	0.0881041	0.000924864
LOC5568093	AAEL006507	Down	-0.365635	0.0977527	0.00108183
LOC5567068	AAEL005798	Down	-0.366537	0.0514576	2.12652e-05
LOC5567290	AAEL005947	Down	-0.366685	0.0870255	0.000800466
LOC5578830	AAEL013872	Down	-0.366858	0.0866489	0.00063791
LOC5568035	AAEL006476	Down	-0.367927	0.0822225	0.00244732
LOC5566166	AAEL005221	Down	-0.367995	0.0329893	1.1968e-05
LOC5564726	AAEL004406	Down	-0.368434	0.0758183	0.00045964
LOC5576765	AAEL012746	Down	-0.368644	0.0476447	8.60336e-05
LOC5563849	AAEL014177	Down	-0.368687	0.0957691	0.00109263
LOC23687533	AAEL017113	Down	-0.368697	0.0660438	0.000182719
LOC5576440	AAEL005536	Down	-0.368712	0.0163478	3.98644e-05
LOC5563812	AAEL014142	Down	-0.368896	0.0801451	0.000459142
LOC5564469	AAEL014452	Down	-0.369259	0.0528722	0.000188091
LOC5572430	AAEL001830	Down	-0.369856	0.0919974	0.00069297
LOC5569590	AAEL001247	Down	-0.370211	0.0317779	1.42152e-05
LOC5567129	AAEL005884	Down	-0.37024	0.067513	0.000323196
LOC5579041	AAEL013989	Down	-0.370266	0.0268108	7.2281e-06
LOC5564041	AAEL004042	Down	-0.370555	0.0305048	6.94301e-05
LOC5567465	AAEL000942	Down	-0.370699	0.0516464	4.57716e-05
LOC5567344	AAEL019477	Down	-0.370823	0.0482476	9.06702e-05
LOC5579259	AAEL015653	Down	-0.371445	0.0861804	0.000501951
LOC5570550	AAEL008363	Down	-0.371471	0.0904421	0.000780815
LOC5573015	AAEL001916	Down	-0.37185	0.054035	3.84388e-05
LOC5565702	AAEL014943	Down	-0.372196	0.0330147	2.9254e-05
LOC5574429	AAEL011157	Down	-0.37292	0.0364574	9.54253e-05
LOC5579871	AAEL005985	Down	-0.373016	0.0425128	4.48202e-05
LOC5575535	AAEL011905	Down	-0.373985	0.0234364	3.80907e-06
LOC5574335	AAEL002349	Down	-0.374405	0.0792449	0.000392811
LOC5574739	AAEL011369	Down	-0.374614	0.0848681	0.000775267
LOC110675403	AAEL026415	Down	-0.37496	0.0609915	0.000155925
LOC23687901	AAEL017481	Down	-0.375179	0.0298	7.21628e-06
LOC5570214	AAEL008154	Down	-0.375264	0.0407303	6.43911e-05
LOC5564878	AAEL004457	Down	-0.375366	0.0159377	0.000137842
LOC5575032	AAEL011584	Down	-0.375544	0.0533545	2.19433e-05
LOC5579199	AAEL014039	Down	-0.375623	0.017714	9.21426e-05
LOC5575995	AAEL002761	Down	-0.375839	0.0475241	9.40412e-06
LOC5571045	AAEL008770	Down	-0.375852	0.0550127	1.78699e-05
LOC5577244	AAEL003142	Down	-0.376015	0.0613234	0.000240201
LOC110679374	AAEL026843	Down	-0.376609	0.022176	7.46713e-06
LOC5576220	AAEL002834	Down	-0.376816	0.113287	0.00239952
LOC5578306	AAEL013623	Down	-0.377139	0.0172164	9.11829e-05
LOC5574502	AAEL002375	Down	-0.377381	0.0840515	0.000419705
LOC5579810	AAEL005515	Down	-0.378296	0.0218011	2.45455e-06
LOC5576345	AAEL002866	Down	-0.378342	0.0706934	8.9857e-05
LOC5564686	AAEL004397	Down	-0.37934	0.0898686	0.000842456
LOC5573879	AAEL010801	Down	-0.380537	0.0191689	0.000179091
LOC5566309	AAEL005308	Down	-0.380623	0.0634282	0.000183569
LOC5578926	AAEL003746	Down	-0.38101	0.0708411	0.000190854
LOC5576932	AAEL020654	Down	-0.381194	0.0737982	0.00043546
LOC5579924	AAEL006794	Down	-0.382102	0.0816696	0.000299795
LOC5564821	AAEL000626	Down	-0.382157	0.0505133	3.17185e-05
LOC110679868	AAEL027050	Down	-0.382866	0.0507602	0.000127024
LOC110677877	AAEL028239	Down	-0.383631	0.096576	0.000585778
LOC5575264	AAEL011718	Down	-0.384097	0.0596519	6.78753e-05
LOC5568702	AAEL007055	Down	-0.384501	0.0461385	4.72753e-05
LOC5572129	AAEL026603	Down	-0.384647	0.0791135	0.000198562
LOC5576419	AAEL012513	Down	-0.384713	0.0806479	0.000528325
LOC5574403	AAEL011129	Down	-0.384809	0.0709327	0.000149972
LOC5568430	AAEL006833	Down	-0.385264	0.0380134	1.28249e-05
LOC110681483	AAEL026895	Down	-0.385382	0.0734086	0.00051297
LOC5576102	AAEL002779	Down	-0.385561	0.0679969	0.000170312
LOC5568099	AAEL006552	Down	-0.385816	0.0923039	0.000378014
LOC5578941	AAEL003769	Down	-0.386262	0.0670882	0.000214161
LOC5578388	AAEL013675	Down	-0.387168	0.0418486	4.94601e-05
LOC5570333	AAEL001360	Down	-0.387283	0.0876299	0.000564902
LOC5564232	AAEL022725	Down	-0.387894	0.0882063	0.000597971
LOC5565782	AAEL004977	Down	-0.388269	0.0948068	0.0013375
LOC5578622	AAEL003606	Down	-0.388747	0.0594878	6.50112e-05
LOC5578382	AAEL013661	Down	-0.389347	0.0291157	2.01009e-06
LOC5564118	AAEL004118	Down	-0.389411	0.0347248	0.000233874
LOC5573678	AAEL010661	Down	-0.390111	0.0366281	0.000281665
LOC5573894	AAEL002184	Down	-0.390844	0.0816449	0.000392258
LOC5575182	AAEL019826	Down	-0.391698	0.0905865	0.000530253
LOC110679365	AAEL020525	Down	-0.391744	0.0757931	9.22109e-05
LOC5576841	AAEL012827	Down	-0.391979	0.0751048	9.87649e-05
LOC5566684	AAEL005567	Down	-0.392366	0.0427171	3.01851e-05
LOC5573256	AAEL010338	Down	-0.392911	0.0337924	3.2293e-06
LOC5580331	AAEL013074	Down	-0.394541	0.0487839	3.2094e-05
LOC5572992	AAEL001952	Down	-0.395687	0.0898908	0.000270903
LOC23687388	AAEL027199	Down	-0.395747	0.0828343	0.000171227
LOC5579467	AAEL023603	Down	-0.397742	0.0596201	7.86989e-05
LOC5576477	AAEL002887	Down	-0.398086	0.0734837	0.000209778
LOC5565030	AAEL026380	Down	-0.398299	0.0945041	0.000878133
LOC110676417	AAEL023209	Down	-0.398936	0.0545395	8.43611e-05
LOC5568996	AAEL007290	Down	-0.399472	0.0767987	0.000283238
LOC5563960	AAEL004010	Down	-0.39953	0.0392776	0.000300277
LOC5571437	AAEL009070	Down	-0.400206	0.0742629	0.000195563
LOC5577270	AAEL019537	Down	-0.400272	0.0480965	2.0515e-05
LOC5577489	AAEL013229	Down	-0.400466	0.0732198	8.22434e-05
LOC5565869	AAEL015007	Down	-0.400471	0.078667	0.000269319
LOC5572082	AAEL009510	Down	-0.400655	0.0410237	1.66154e-05
LOC5573210	AAEL010300	Down	-0.400701	0.0877525	0.00031054
LOC5564924	AAEL023756	Down	-0.401647	0.0593525	0.000126197
LOC5577510	AAEL003180	Down	-0.401733	0.0601661	7.25578e-05
LOC5568611	AAEL006976	Down	-0.401738	0.0708045	4.177e-05
LOC23687839	AAEL017419	Down	-0.401971	0.0232776	1.97365e-05
LOC5571461	AAEL009092	Down	-0.402456	0.0740843	0.000243823
LOC5565765	AAEL004973	Down	-0.403827	0.0473715	4.19299e-05
LOC5577550	AAEL013263	Down	-0.404265	0.0896724	0.000433557
LOC5571944	AAEL009432	Down	-0.404824	0.0580242	0.00104773
LOC5569144	AAEL007392	Down	-0.40547	0.0353594	2.78327e-05
LOC5567769	AAEL000102	Down	-0.406292	0.0465691	0.000668747
LOC5572295	AAEL007800	Down	-0.406647	0.0625796	0.00022376
LOC5564858	AAEL004467	Down	-0.407525	0.0591663	8.93811e-05
LOC5574190	AAEL002308	Down	-0.407784	0.0568838	0.00026974
LOC5579326	AAEL015575	Down	-0.408143	0.0582455	8.99338e-05
LOC5576078	AAEL012310	Down	-0.40893	0.084678	0.000387943
LOC5571080	AAEL008787	Down	-0.409591	0.0300302	1.94296e-05
LOC5564056	AAEL004059	Down	-0.409951	0.0446551	5.58087e-05
LOC5564781	AAEL004419	Down	-0.409983	0.0668265	0.000374091
LOC5576468	AAEL002903	Down	-0.410839	0.0753583	0.000172426
LOC5564956	AAEL024396	Down	-0.412688	0.0439742	1.76359e-05
LOC5566143	AAEL005213	Down	-0.413011	0.0370955	8.80915e-06
LOC5567313	AAEL005958	Down	-0.413715	0.097257	0.000356521
LOC5566167	AAEL005238	Down	-0.413978	0.0948543	0.000493889
LOC5573292	AAEL010371	Down	-0.415111	0.0852994	0.000279751
LOC5569670	AAEL007824	Down	-0.415291	0.00952939	6.88959e-05
LOC5566936	AAEL005699	Down	-0.41606	0.0623366	0.000138905
LOC5566450	AAEL005391	Down	-0.416155	0.0877739	0.000301605
LOC5564509	AAEL004297	Down	-0.416213	0.0774511	0.000519574
LOC5574352	AAEL002360	Down	-0.417079	0.132012	0.00287446
LOC5567364	AAEL006035	Down	-0.417396	0.080964	0.000349478
LOC110674119	AAEL026582	Down	-0.418178	0.0478141	0.000453041
LOC5574746	AAEL011381	Down	-0.418934	0.0419	1.11982e-05
LOC5569050	AAEL007349	Down	-0.419574	0.0236699	5.78804e-06
LOC5569438	AAEL001236	Down	-0.420109	0.0844272	0.000492022
LOC5571854	AAEL009345	Down	-0.420858	0.0381529	1.45883e-05
LOC5576420	AAEL012507	Down	-0.421876	0.0578584	7.0744e-05
LOC5569471	AAEL007660	Down	-0.422006	0.0926912	0.000608801
LOC5574239	AAEL011009	Down	-0.422333	0.063334	0.000165726
LOC110676240	AAEL025610	Down	-0.422379	0.0889333	0.000367065
LOC5569864	AAEL007944	Down	-0.427869	0.0560481	1.79789e-05
LOC110677665	AAEL010932	Down	-0.428072	0.0879176	0.000286174
LOC5571976	AAEL009467	Down	-0.428269	0.0296235	9.18219e-06
LOC5564549	AAEL004317	Down	-0.428868	0.0681471	0.000237525
LOC5577719	AAEL013353	Down	-0.430523	0.0241192	7.83086e-06
LOC5576045	AAEL012272	Down	-0.431857	0.0617071	0.000208543
LOC110680940	AAEL025213	Down	-0.432119	0.0803369	0.00147393
LOC5570554	AAEL008367	Down	-0.432185	0.0688831	9.11184e-05
LOC5574592	AAEL002411	Down	-0.432269	0.0258781	9.11418e-07
LOC5571557	AAEL009142	Down	-0.4323	0.0827836	0.000225501
LOC5565931	AAEL025321	Down	-0.433586	0.0272241	9.1297e-06
LOC5576268	AAEL012427	Down	-0.433592	0.0852422	0.000251677
LOC5570136	AAEL008105	Down	-0.434328	0.0671117	8.68223e-05
LOC5573821	AAEL010743	Down	-0.434585	0.0835886	0.000115282
LOC5563664	AAEL000084	Down	-0.435117	0.0667622	9.82286e-05
LOC5578927	AAEL003750	Down	-0.435714	0.0193871	1.92061e-06
LOC5571449	AAEL009085	Down	-0.435983	0.0730048	0.000109481
LOC5577017	AAEL012941	Down	-0.4361	0.0968886	0.00239421
LOC5579815	AAEL023500	Down	-0.436226	0.0439052	6.17356e-05
LOC5570694	AAEL008497	Down	-0.436307	0.0941106	0.000461866
LOC5571539	AAEL009125	Down	-0.436708	0.0831053	0.0018355
LOC5570667	AAEL008486	Down	-0.436793	0.065577	0.000156352
LOC5574634	AAEL020739	Down	-0.437544	0.0453394	4.8239e-06
LOC5573238	AAEL010330	Down	-0.43791	0.0367908	0.000256499
LOC23687710	AAEL017290	Down	-0.437912	0.0352879	5.73286e-05
LOC23687462	AAEL017042	Down	-0.437983	0.0466666	1.46425e-05
LOC5575301	AAEL023523	Down	-0.438724	0.0594883	0.000103618
LOC5572285	AAEL001779	Down	-0.440691	0.0408083	4.1174e-05
LOC5563971	AAEL004023	Down	-0.441304	0.0667254	0.000202525
LOC5571588	AAEL009178	Down	-0.441312	0.0905896	0.000283272
LOC5579021	AAEL013960	Down	-0.441909	0.0322775	0.000131171
LOC5572547	AAEL009872	Down	-0.44194	0.0681451	4.31249e-05
LOC5572041	AAEL000235	Down	-0.442324	0.0917258	0.000139643
LOC5580239	AAEL012326	Down	-0.44247	0.0186	9.46372e-05
LOC5569181	AAEL007441	Down	-0.443344	0.0260103	1.54876e-06
LOC5567858	AAEL006321	Down	-0.443751	0.090133	0.000149023
LOC5567341	AAEL006011	Down	-0.443859	0.012787	1.12732e-06
LOC5566868	AAEL000800	Down	-0.44422	0.059282	0.000100867
LOC110675493	AAEL028043	Down	-0.444248	0.00980183	1.11585e-07
LOC5567260	AAEL005928	Down	-0.444564	0.0658483	0.000145134
LOC5564516	AAEL004284	Down	-0.445545	0.0199017	6.65902e-06
LOC5568520	AAEL027905	Down	-0.445601	0.0780715	0.000105599
LOC5567559	AAEL006158	Down	-0.445924	0.0250963	0.000131408
LOC5564541	AAEL004307	Down	-0.447386	0.0480289	6.83972e-06
LOC5577568	AAEL013279	Down	-0.449581	0.0311999	5.40053e-05
LOC5578900	AAEL013904	Down	-0.450201	0.05895	6.41038e-05
LOC5571582	AAEL009171	Down	-0.450922	0.0883958	0.000312608
LOC5570877	AAEL008656	Down	-0.451199	0.0651979	7.61634e-05
LOC5564477	AAEL014484	Down	-0.451605	0.0431643	0.000522247
LOC5579108	AAEL003844	Down	-0.452133	0.0279457	5.85021e-06
LOC5574902	AAEL011500	Down	-0.452873	0.0455371	1.88167e-05
LOC5568046	AAEL006483	Down	-0.453501	0.0187579	0.000148827
LOC5569520	AAEL007707	Down	-0.453725	0.0240712	1.97261e-06
LOC5573401	AAEL022051	Down	-0.454071	0.0557373	1.13451e-05
LOC5565409	AAEL014847	Down	-0.454482	0.0457691	1.98149e-08
LOC5568302	AAEL006741	Down	-0.454562	0.0538117	6.25547e-05
LOC110674160	AAEL022282	Down	-0.454806	0.0673123	8.68387e-06
LOC5566613	AAEL000757	Down	-0.456152	0.0727579	0.000228893
LOC5567160	AAEL005910	Down	-0.456557	0.0844207	0.000173261
LOC5568521	AAEL006928	Down	-0.457307	0.0439539	2.49263e-05
LOC5576914	AAEL012865	Down	-0.457879	0.0705608	9.19805e-05
LOC5570619	AAEL008425	Down	-0.458047	0.0629896	3.88542e-05
LOC5576039	AAEL012280	Down	-0.45829	0.0903059	0.000267082
LOC5570230	AAEL008152	Down	-0.458648	0.0511193	5.53257e-05
LOC5565629	AAEL014913	Down	-0.458732	0.0393051	7.90191e-06
LOC5571414	AAEL009041	Down	-0.459371	0.0818109	9.20172e-05
LOC5571136	AAEL008828	Down	-0.460169	0.0541364	1.07208e-05
LOC5569166	AAEL007431	Down	-0.460759	0.0333492	4.40715e-06
LOC5577678	AAEL013314	Down	-0.460791	0.0769956	0.000135336
LOC5565220	AAEL004676	Down	-0.462672	0.059845	2.88465e-06
LOC5564278	AAEL014379	Down	-0.463259	0.037853	3.28129e-05
LOC5574244	-	Down	-0.46381	0.0553033	5.1633e-05
LOC5577552	AAEL013262	Down	-0.464233	0.0931844	0.00017242
LOC5566864	AAEL000847	Down	-0.464411	0.0452207	7.33608e-05
LOC5569899	AAEL007990	Down	-0.465165	0.0425152	3.07074e-05
LOC5565228	AAEL018326	Down	-0.465905	0.0949425	0.000299986
LOC5574633	AAEL011276	Down	-0.466012	0.0484966	5.25158e-06
LOC5574363	AAEL011081	Down	-0.467929	0.0855946	0.000453961
LOC5565215	AAEL004661	Down	-0.467964	0.0550969	0.000122802
LOC5576837	AAEL012816	Down	-0.468206	0.0881545	0.000124625
LOC5574667	AAEL011302	Down	-0.469285	0.040193	1.52452e-05
LOC5570054	AAEL000186	Down	-0.469656	0.0720147	2.01944e-05
LOC5570068	AAEL001331	Down	-0.471169	0.0831702	0.000118783
LOC110678015	AAEL023988	Down	-0.472211	0.098703	0.00029995
LOC5577060	AAEL003109	Down	-0.472827	0.0840302	0.000164398
LOC5569681	AAEL007818	Down	-0.476252	0.0110876	4.00323e-05
LOC5572931	AAEL010145	Down	-0.477324	0.016616	0.000120656
LOC5572671	AAEL001869	Down	-0.477379	0.0916938	0.000437983
LOC5570932	AAEL008671	Down	-0.478675	0.0690743	8.32087e-05
LOC5564053	AAEL004060	Down	-0.479062	0.0218689	7.15451e-07
LOC5572265	AAEL001769	Down	-0.480693	0.0704886	2.18434e-05
LOC5572209	AAEL009601	Down	-0.480948	0.0536384	5.51968e-05
LOC5567684	AAEL006251	Down	-0.48132	0.0394473	2.60747e-05
LOC23687827	AAEL025574	Down	-0.48146	0.0351121	4.48513e-06
LOC5567242	AAEL000883	Down	-0.48224	0.0909945	0.000257526
LOC5579926	AAEL006795	Down	-0.482271	0.0612766	1.93421e-06
LOC5569556	AAEL007760	Down	-0.484564	0.0930682	0.000255058
LOC5573312	AAEL010416	Down	-0.484846	0.0352572	2.89648e-06
LOC5578266	AAEL003505	Down	-0.485552	0.0380674	4.81006e-05
LOC5577687	AAEL013320	Down	-0.487742	0.0449256	1.44585e-05
LOC5578684	AAEL003645	Down	-0.488924	0.0335612	1.73298e-06
LOC5568246	AAEL006685	Down	-0.489215	0.0509154	7.41411e-05
LOC5564117	AAEL019408	Down	-0.490499	0.0388939	3.95597e-06
LOC5577519	AAEL021813	Down	-0.490712	0.060439	4.75581e-05
LOC5569984	AAEL008073	Down	-0.491821	0.0295761	1.89473e-05
LOC5576995	AAEL003066	Down	-0.49319	0.0282062	1.12387e-06
LOC5575238	AAEL011708	Down	-0.49338	0.0353928	2.16749e-05
LOC5571869	-	Down	-0.494007	0.0516649	3.90872e-05
LOC5566301	AAEL005293	Down	-0.494241	0.0321683	3.00619e-06
LOC5564409	AAEL020477	Down	-0.495196	0.085266	0.000111157
LOC5570924	AAEL026751	Down	-0.495205	0.0507721	0.000468694
LOC110674390	AAEL026769	Down	-0.496006	0.0808992	0.000242
LOC5572173	AAEL009590	Down	-0.496383	0.0364645	1.31911e-05
LOC5570080	AAEL001336	Down	-0.49656	0.0614575	5.98256e-05
LOC5577139	AAEL003125	Down	-0.496633	0.0589145	0.000118774
LOC110676370	AAEL021600	Down	-0.497061	0.0469775	3.72849e-05
LOC5577180	AAEL013052	Down	-0.500315	0.0737731	6.40197e-06
LOC5565060	AAEL025769	Down	-0.500332	0.0408534	2.46505e-05
LOC5579045	AAEL013980	Down	-0.500585	0.0362066	0.000222499
LOC5570020	AAEL000182	Down	-0.501577	0.0246274	7.23802e-06
LOC5570571	AAEL008379	Down	-0.501832	0.0945347	0.000316769
LOC5574731	AAEL011371	Down	-0.502287	0.045917	3.75514e-05
LOC5571689	AAEL028066	Down	-0.503365	0.0286515	1.67354e-06
LOC5566122	AAEL005177	Down	-0.50376	0.0701248	5.55428e-05
LOC5572696	AAEL009964	Down	-0.504026	0.0196289	8.77839e-05
LOC5565961	AAEL005048	Down	-0.505557	0.0659579	0.000101032
LOC5565032	AAEL004553	Down	-0.505608	0.0766402	0.000167704
LOC5574640	AAEL011274	Down	-0.505741	0.0596664	6.52423e-05
LOC5572793	AAEL001906	Down	-0.50619	0.074512	5.9322e-05
LOC5573951	AAEL002190	Down	-0.506794	0.0931401	0.000213963
LOC5579374	AAEL023497	Down	-0.508647	0.0883019	0.000135307
LOC5576966	AAEL003060	Down	-0.510252	0.0127207	2.07023e-05
LOC5571289	AAEL019546	Down	-0.511648	0.0433012	7.80478e-05
LOC5566824	AAEL022609	Down	-0.511794	0.0508373	2.93706e-05
LOC5569847	AAEL007962	Down	-0.511867	0.0555972	4.19337e-05
LOC110678855	AAEL025367	Down	-0.512049	0.0302224	1.09982e-05
LOC5574806	AAEL002467	Down	-0.51367	0.0469449	2.42126e-05
LOC110681196	AAEL017135	Down	-0.513729	0.0896688	0.000101618
LOC23687739	AAEL017319	Down	-0.514369	0.0613563	2.51527e-05
LOC5576986	AAEL003055	Down	-0.514902	0.0864443	0.000230714
LOC5576501	AAEL012552	Down	-0.515971	0.0603232	5.24216e-05
LOC5564124	AAEL004086	Down	-0.51907	0.0902176	6.48602e-05
LOC5567358	AAEL006023	Down	-0.519791	0.0687303	3.20762e-05
LOC5573952	AAEL002225	Down	-0.520307	0.0943866	0.00013431
LOC5574120	AAEL022600	Down	-0.520951	0.0404262	1.52476e-06
LOC5567081	AAEL005808	Down	-0.521111	0.0729856	5.37629e-05
LOC5569048	AAEL007344	Down	-0.521542	0.0486541	4.35176e-05
LOC5572049	AAEL000245	Down	-0.521622	0.0489132	4.73646e-07
LOC5571127	AAEL019751	Down	-0.522991	0.0494939	5.45337e-06
LOC5578603	AAEL023219	Down	-0.523417	0.0598394	2.23812e-05
LOC5566370	AAEL005354	Down	-0.525014	0.0608718	1.9776e-05
LOC5573851	AAEL010777	Down	-0.525903	0.027413	4.1962e-06
LOC5575278	AAEL011741	Down	-0.525971	0.020426	1.40635e-05
LOC5563618	AAEL000049	Down	-0.526018	0.0899907	0.000115552
LOC110676996	AAEL025355	Down	-0.526299	0.0808161	5.22461e-05
LOC5568325	AAEL006718	Down	-0.528952	0.0560931	3.49912e-05
LOC5568019	AAEL006458	Down	-0.53089	0.070839	0.000125912
LOC5565452	AAEL000663	Down	-0.531038	0.0936299	0.000188334
LOC23687516	AAEL017096	Down	-0.531155	0.0101077	2.68785e-07
LOC5564019	AAEL019487	Down	-0.533883	0.0577468	2.83649e-05
LOC5565619	AAEL014899	Down	-0.535283	0.0526083	3.07047e-05
LOC5577423	AAEL003160	Down	-0.536303	0.0136138	5.19267e-05
LOC110676812	AAEL025344	Down	-0.537194	0.0675197	1.02557e-05
LOC5570784	AAEL022646	Down	-0.537217	0.0232065	6.49699e-08
LOC5576532	AAEL012579	Down	-0.537502	0.0940347	5.58236e-05
LOC5571506	AAEL019988	Down	-0.537928	0.0878054	0.000133056
LOC5573744	AAEL019937	Down	-0.538812	0.023792	5.63914e-08
LOC110679616	AAEL027646	Down	-0.538986	0.0635803	0.000105005
LOC5573574	AAEL002118	Down	-0.539264	0.0548604	6.25596e-05
LOC5570643	AAEL008454	Down	-0.540683	0.0656754	4.10902e-05
LOC5575980	AAEL012227	Down	-0.540889	0.0585951	4.71949e-05
LOC5563882	AAEL014204	Down	-0.540908	0.0657526	2.87738e-05
LOC5570324	AAEL001385	Down	-0.541885	0.0898666	0.00155608
LOC5575321	AAEL002597	Down	-0.542321	0.0502423	1.27574e-05
LOC23687501	AAEL017081	Down	-0.543204	0.035134	9.21013e-06
LOC5566847	AAEL000795	Down	-0.543783	0.0177816	9.77742e-05
LOC5574657	AAEL021072	Down	-0.545163	0.0574594	4.37202e-05
LOC5569577	AAEL007773	Down	-0.546376	0.0819678	8.34628e-05
LOC5572891	AAEL010099	Down	-0.546773	0.045757	1.75397e-05
LOC5578361	AAEL003550	Down	-0.546791	0.0516476	1.33877e-05
LOC5577544	AAEL013256	Down	-0.547662	0.0715545	3.39717e-05
LOC110676279	AAEL021140	Down	-0.548032	0.0188828	1.2303e-07
LOC5574783	AAEL011414	Down	-0.5481	0.0285876	4.96953e-06
LOC5571907	AAEL009414	Down	-0.548285	0.0414126	3.05587e-05
LOC5576835	AAEL012819	Down	-0.549345	0.028258	3.98343e-06
LOC5571828	AAEL001690	Down	-0.54995	0.0446191	7.5473e-05
LOC5578354	AAEL003508	Down	-0.550222	0.0421993	1.76611e-05
LOC5574636	AAEL011273	Down	-0.551068	0.0725694	7.98703e-05
LOC5573673	AAEL019604	Down	-0.551512	0.0947703	0.00143865
LOC5568503	AAEL006922	Down	-0.552435	0.0393099	0.000227951
LOC110678796	AAEL023967	Down	-0.552502	0.0558556	4.69487e-05
LOC23687815	AAEL017395	Down	-0.552622	0.0616377	1.07052e-06
LOC5569183	AAEL007439	Down	-0.553128	0.0356561	5.57712e-06
LOC5576170	AAEL012359	Down	-0.553725	0.0219791	2.73668e-06
LOC110678856	AAEL027968	Down	-0.554224	0.0538962	3.97631e-05
LOC5577284	AAEL013138	Down	-0.554918	0.066164	3.95362e-05
LOC5578882	AAEL013885	Down	-0.555433	0.0299176	3.94748e-05
LOC5564231	AAEL004176	Down	-0.557078	0.0802769	0.000151888
LOC5565405	AAEL014843	Down	-0.557325	0.0283883	2.18506e-07
LOC5576124	AAEL002811	Down	-0.5584	0.0253484	6.7077e-07
LOC5573295	AAEL010382	Down	-0.559403	0.0586962	0.000612434
LOC5574496	AAEL002399	Down	-0.559678	0.0450342	3.42441e-05
LOC5572521	AAEL009836	Down	-0.560697	0.0659454	0.000704461
LOC5567857	AAEL006315	Down	-0.564915	0.0692416	2.01288e-05
LOC5576488	AAEL002900	Down	-0.565376	0.0542442	6.0068e-05
LOC5564768	AAEL004434	Down	-0.565573	0.034999	4.11691e-06
LOC5570828	AAEL008605	Down	-0.566612	0.0796162	8.26867e-05
LOC5579885	AAEL001030	Down	-0.567092	0.0904833	0.000146317
LOC110675318	-	Down	-0.570233	0.0510359	1.41324e-05
LOC5571150	AAEL008848	Down	-0.570621	0.0253475	3.47668e-07
LOC5571093	AAEL008801	Down	-0.571356	0.0232219	1.00179e-07
[truncated: 163 more rows]

## Sheet: EC-like-2
gene	VectorBase_ID	Regulation	de_coef	de_se	de_pval
[truncated: 547 more rows]

[truncated: 9 more sheets: EC-like-3, EE-1, EE-2, EE-3, EE-4, SV2_UNC-93, VM, HC, FBC]
