# Supplementary material for: Midgut cell atlas and virome of four important mosquito species and immune landscapes of dengue virus infection
Source: Research Square preprint supplement (doi:10.21203/rs.3.rs-7214530/v1), 2025-08-11
Supplement: Supplementary file 7 [file f4c63a6354de2b56f1746919.xlsx]

## Sheet: aaebl_vs_aae(ctrl)
cluster	gene	VectorBase_ID	Regulation	de_coef	de_se	de_pval
ISC/EB-1	LOC5574806	AAEL002467	Up	1.11335	0.176745	6.56e-05
ISC/EB-1	LOC5574806	AAEL002467	Up	1.11335	0.176745	6.55741e-05
ISC/EB-1	LOC5567964	AAEL006425	Up	1.10367	0.0574729	1.04613e-05
ISC/EB-1	LOC5567964	AAEL006425	Up	1.10367	0.0574729	1.05e-05
ISC/EB-1	LOC5565454	AAEL000647	Up	1.06719	0.143841	9.61935e-05
ISC/EB-1	LOC5565454	AAEL000647	Up	1.06719	0.143841	9.62e-05
ISC/EB-1	LOC5570784	AAEL022646	Up	1.03687	0.118599	2.41e-05
ISC/EB-1	LOC5570784	AAEL022646	Up	1.03687	0.118599	2.4075e-05
ISC/EB-1	LOC110676705	AAEL022822	Up	0.914105	0.166863	0.000169331
ISC/EB-1	LOC110676705	AAEL022822	Up	0.914105	0.166863	0.000169331
ISC/EB-1	LOC5571127	AAEL019751	Up	0.851653	0.0938795	6.86711e-05
ISC/EB-1	LOC5571127	AAEL019751	Up	0.851653	0.0938795	6.87e-05
ISC/EB-1	LOC5577355	AAEL000458	Up	0.800379	0.132282	7.49e-05
ISC/EB-1	LOC5577355	AAEL000458	Up	0.800379	0.132282	7.48857e-05
ISC/EB-1	CFI06_mgp05	-	Up	0.774049	0.0603149	3.86e-06
ISC/EB-1	CFI06_mgp05	-	Up	0.774049	0.0603149	3.85823e-06
ISC/EB-1	CFI06_mgp07	-	Up	0.763418	0.0693055	0.000426994
ISC/EB-1	CFI06_mgp07	-	Up	0.763418	0.0693055	0.000426994
ISC/EB-1	LOC110678855	AAEL025367	Up	0.743082	0.0844738	6.37e-05
ISC/EB-1	LOC110678855	AAEL025367	Up	0.743082	0.0844738	6.37249e-05
ISC/EB-1	LOC5571689	AAEL028066	Up	0.739791	0.127985	0.000305587
ISC/EB-1	LOC5571689	AAEL028066	Up	0.739791	0.127985	0.000305587
ISC/EB-1	LOC5570219	AAEL024456	Up	0.726698	0.0959187	8.88e-05
ISC/EB-1	LOC5570219	AAEL024456	Up	0.726698	0.0959187	8.87604e-05
ISC/EB-1	LOC5575550	AAEL002661	Up	0.71089	0.0665972	5.55e-05
ISC/EB-1	LOC5575550	AAEL002661	Up	0.71089	0.0665972	5.54871e-05
ISC/EB-1	LOC5568487	AAEL006902	Up	0.704636	0.137285	0.000626442
ISC/EB-1	LOC5568487	AAEL006902	Up	0.704636	0.137285	0.000626442
ISC/EB-1	LOC5566457	AAEL005428	Up	0.699847	0.0888129	0.000165777
ISC/EB-1	LOC5566457	AAEL005428	Up	0.699847	0.0888129	0.000165777
ISC/EB-1	LOC5575535	AAEL011905	Up	0.667017	0.127638	0.000354102
ISC/EB-1	LOC5575535	AAEL011905	Up	0.667017	0.127638	0.000354102
ISC/EB-1	LOC5569083	AAEL001209	Up	0.645568	0.136762	0.000272003
ISC/EB-1	LOC5569083	AAEL001209	Up	0.645568	0.136762	0.000272003
ISC/EB-1	LOC5567691	AAEL006283	Up	0.622982	0.165369	0.00120316
ISC/EB-1	LOC5567691	AAEL006283	Up	0.622982	0.165369	0.00120316
ISC/EB-1	LOC5574677	AAEL011319	Up	0.616124	0.134028	0.000287722
ISC/EB-1	LOC5574677	AAEL011319	Up	0.616124	0.134028	0.000287722
ISC/EB-1	LOC5568253	AAEL006699	Up	0.615667	0.131632	0.000461845
ISC/EB-1	LOC5568253	AAEL006699	Up	0.615667	0.131632	0.000461845
ISC/EB-1	LOC5568255	AAEL006704	Up	0.588518	0.101117	0.000469268
ISC/EB-1	LOC5568255	AAEL006704	Up	0.588518	0.101117	0.000469268
ISC/EB-1	LOC5564053	AAEL004060	Up	0.586727	0.0741446	1.09137e-05
ISC/EB-1	LOC5564053	AAEL004060	Up	0.586727	0.0741446	1.09e-05
ISC/EB-1	LOC5574193	AAEL002309	Up	0.571054	0.178275	0.00288433
ISC/EB-1	LOC5574193	AAEL002309	Up	0.571054	0.178275	0.00288433
ISC/EB-1	LOC23687827	AAEL025574	Up	0.570049	0.128321	0.000561866
ISC/EB-1	LOC23687827	AAEL025574	Up	0.570049	0.128321	0.000561866
ISC/EB-1	LOC5563966	AAEL004025	Up	0.539165	0.14134	0.000867185
ISC/EB-1	LOC5563966	AAEL004025	Up	0.539165	0.14134	0.000867185
ISC/EB-1	LOC5572173	AAEL009590	Up	0.530821	0.111883	0.000151298
ISC/EB-1	LOC5572173	AAEL009590	Up	0.530821	0.111883	0.000151298
ISC/EB-1	LOC5572208	AAEL009606	Up	0.503576	0.153198	0.00263904
ISC/EB-1	LOC5572208	AAEL009606	Up	0.503576	0.153198	0.00263904
ISC/EB-1	LOC5564121	AAEL004090	Up	0.495847	0.123409	0.000546071
ISC/EB-1	LOC5564121	AAEL004090	Up	0.495847	0.123409	0.000546071
ISC/EB-1	LOC5569925	AAEL027654	Up	0.492166	0.142914	0.00155393
ISC/EB-1	LOC5569925	AAEL027654	Up	0.492166	0.142914	0.00155393
ISC/EB-1	CFI06_mgp03	-	Up	0.491305	0.0622055	3.23e-06
ISC/EB-1	CFI06_mgp03	-	Up	0.491305	0.0622055	3.22838e-06
ISC/EB-1	LOC5572372	AAEL009760	Up	0.489866	0.0591804	3.34e-05
ISC/EB-1	LOC5572372	AAEL009760	Up	0.489866	0.0591804	3.34188e-05
ISC/EB-1	LOC5579043	AAEL013987	Up	0.489656	0.0661763	4.00971e-05
ISC/EB-1	LOC5579043	AAEL013987	Up	0.489656	0.0661763	4.01e-05
ISC/EB-1	LOC5571039	AAEL008784	Up	0.48398	0.0837773	3.95229e-05
ISC/EB-1	LOC5571039	AAEL008784	Up	0.48398	0.0837773	3.95e-05
ISC/EB-1	LOC5568254	AAEL006702	Up	0.465614	0.119208	0.000711777
ISC/EB-1	LOC5568254	AAEL006702	Up	0.465614	0.119208	0.000711777
ISC/EB-1	LOC5570114	AAEL008079	Up	0.461409	0.0961707	0.00220932
ISC/EB-1	LOC5570114	AAEL008079	Up	0.461409	0.0961707	0.00220932
ISC/EB-1	LOC5570312	AAEL008249	Up	0.4584	0.147806	0.00279944
ISC/EB-1	LOC5570312	AAEL008249	Up	0.4584	0.147806	0.00279944
ISC/EB-1	CFI06_mgp01	-	Up	0.458123	0.0725437	0.000235354
ISC/EB-1	CFI06_mgp01	-	Up	0.458123	0.0725437	0.000235354
ISC/EB-1	LOC5568717	AAEL007043	Up	0.45642	0.13337	0.00182149
ISC/EB-1	LOC5568717	AAEL007043	Up	0.45642	0.13337	0.00182149
ISC/EB-1	LOC5573667	AAEL010673	Up	0.451439	0.140213	0.00294435
ISC/EB-1	LOC5573667	AAEL010673	Up	0.451439	0.140213	0.00294435
ISC/EB-1	LOC5571955	AAEL026633	Up	0.443987	0.104697	0.000621428
ISC/EB-1	LOC5571955	AAEL026633	Up	0.443987	0.104697	0.000621428
ISC/EB-1	LOC5571712	AAEL009244	Up	0.439155	0.0926727	0.000389426
ISC/EB-1	LOC5571712	AAEL009244	Up	0.439155	0.0926727	0.000389426
ISC/EB-1	LOC110675610	AAEL026008	Up	0.437796	0.0306074	1.69293e-05
ISC/EB-1	LOC110675610	AAEL026008	Up	0.437796	0.0306074	1.69e-05
ISC/EB-1	LOC5578505	AAEL013703	Up	0.437497	0.0635138	0.000129485
ISC/EB-1	LOC5578505	AAEL013703	Up	0.437497	0.0635138	0.000129485
ISC/EB-1	CFI06_mgp06	-	Up	0.434617	0.0616262	7.13571e-05
ISC/EB-1	CFI06_mgp06	-	Up	0.434617	0.0616262	7.14e-05
ISC/EB-1	LOC5565156	AAEL004616	Up	0.420797	0.134172	0.00312076
ISC/EB-1	LOC5565156	AAEL004616	Up	0.420797	0.134172	0.00312076
ISC/EB-1	LOC5578605	AAEL003589	Up	0.419288	0.1731	0.0161968
ISC/EB-1	LOC5578605	AAEL003589	Up	0.419288	0.1731	0.0161968
ISC/EB-1	LOC23687442	AAEL017022	Up	0.418871	0.0518559	3.2e-05
ISC/EB-1	LOC23687442	AAEL017022	Up	0.418871	0.0518559	3.19995e-05
ISC/EB-1	LOC23687632	AAEL017212	Up	0.415361	0.0702465	0.000127128
ISC/EB-1	LOC23687632	AAEL017212	Up	0.415361	0.0702465	0.000127128
ISC/EB-1	LOC5578306	AAEL013623	Up	0.40229	0.0638767	7.12e-05
ISC/EB-1	LOC5578306	AAEL013623	Up	0.40229	0.0638767	7.11802e-05
ISC/EB-1	LOC5578590	AAEL013774	Up	0.398933	0.0921118	0.000524647
ISC/EB-1	LOC5578590	AAEL013774	Up	0.398933	0.0921118	0.000524647
ISC/EB-1	LOC5576124	AAEL002811	Up	0.398315	0.09938	0.000463181
ISC/EB-1	LOC5576124	AAEL002811	Up	0.398315	0.09938	0.000463181
ISC/EB-1	LOC110677182	-	Up	0.397627	0.0261582	8.67337e-06
ISC/EB-1	LOC110677182	-	Up	0.397627	0.0261582	8.67e-06
ISC/EB-1	LOC5575264	AAEL011718	Up	0.394483	0.14373	0.00459908
ISC/EB-1	LOC5575264	AAEL011718	Up	0.394483	0.14373	0.00459908
ISC/EB-1	LOC5575982	AAEL019430	Up	0.387377	0.123794	0.0024948
ISC/EB-1	LOC5575982	AAEL019430	Up	0.387377	0.123794	0.0024948
ISC/EB-1	LOC5570020	AAEL000182	Up	0.386793	0.0898005	0.000609118
ISC/EB-1	LOC5570020	AAEL000182	Up	0.386793	0.0898005	0.000609118
ISC/EB-1	LOC110678443	AAEL027700	Up	0.373818	0.115883	0.00342245
ISC/EB-1	LOC110678443	AAEL027700	Up	0.373818	0.115883	0.00342245
ISC/EB-1	LOC5569670	AAEL007824	Up	0.366049	0.0162804	1.18e-06
ISC/EB-1	LOC5569670	AAEL007824	Up	0.366049	0.0162804	1.17701e-06
ISC/EB-1	LOC5570205	AAEL008167	Up	0.33691	0.15963	0.0339932
ISC/EB-1	LOC5570205	AAEL008167	Up	0.33691	0.15963	0.0339932
ISC/EB-1	LOC5565700	AAEL004930	Up	0.328048	0.0858173	0.00101439
ISC/EB-1	LOC5565700	AAEL004930	Up	0.328048	0.0858173	0.00101439
ISC/EB-1	LOC5564874	AAEL004460	Up	0.323623	0.0747844	0.00055546
ISC/EB-1	LOC5564874	AAEL004460	Up	0.323623	0.0747844	0.00055546
ISC/EB-1	LOC5576995	AAEL003066	Up	0.323054	0.113236	0.00479904
ISC/EB-1	LOC5576995	AAEL003066	Up	0.323054	0.113236	0.00479904
ISC/EB-1	LOC23687857	AAEL017437	Up	0.318191	0.10923	0.00419916
ISC/EB-1	LOC23687857	AAEL017437	Up	0.318191	0.10923	0.00419916
ISC/EB-1	LOC5569166	AAEL007431	Up	0.318137	0.108792	0.0039992
ISC/EB-1	LOC5569166	AAEL007431	Up	0.318137	0.108792	0.0039992
ISC/EB-1	LOC5571898	AAEL009381	Up	0.313285	0.15433	0.0413917
ISC/EB-1	LOC5571898	AAEL009381	Up	0.313285	0.15433	0.0413917
ISC/EB-1	LOC110676001	AAEL020729	Up	0.303182	0.157726	0.0489902
ISC/EB-1	LOC110676001	AAEL020729	Up	0.303182	0.157726	0.0489902
ISC/EB-1	LOC5576440	AAEL005536	Up	0.300937	0.0822348	0.00117593
ISC/EB-1	LOC5576440	AAEL005536	Up	0.300937	0.0822348	0.00117593
ISC/EB-1	LOC5574783	AAEL011414	Up	0.300565	0.0624864	0.000190712
ISC/EB-1	LOC5574783	AAEL011414	Up	0.300565	0.0624864	0.000190712
ISC/EB-1	CFI06_mgp13	-	Up	0.297096	0.0599136	0.000176738
ISC/EB-1	CFI06_mgp13	-	Up	0.297096	0.0599136	0.000176738
ISC/EB-1	LOC110676886	AAEL026085	Up	0.296622	0.133276	0.0259948
ISC/EB-1	LOC110676886	AAEL026085	Up	0.296622	0.133276	0.0259948
ISC/EB-1	LOC5577278	AAEL027786	Up	0.294354	0.110304	0.0079984
ISC/EB-1	LOC5577278	AAEL027786	Up	0.294354	0.110304	0.0079984
ISC/EB-1	LOC5573473	AAEL010514	Up	0.293982	0.140487	0.0361928
ISC/EB-1	LOC5573473	AAEL010514	Up	0.293982	0.140487	0.0361928
ISC/EB-1	LOC5578082	AAEL003423	Up	0.29051	0.0950972	0.00319936
ISC/EB-1	LOC5578082	AAEL003423	Up	0.29051	0.0950972	0.00319936
ISC/EB-1	LOC5564118	AAEL004118	Up	0.288259	0.134156	0.0355929
ISC/EB-1	LOC5564118	AAEL004118	Up	0.288259	0.134156	0.0355929
ISC/EB-1	CFI06_mgp09	-	Up	0.287022	0.0327206	6.50308e-05
ISC/EB-1	CFI06_mgp09	-	Up	0.287022	0.0327206	6.5e-05
ISC/EB-1	LOC110678629	AAEL028247	Up	0.2849	0.0635586	0.000919493
ISC/EB-1	LOC110678629	AAEL028247	Up	0.2849	0.0635586	0.000919493
ISC/EB-1	LOC5571803	AAEL009330	Up	0.283683	0.0878412	0.00185792
ISC/EB-1	LOC5571803	AAEL009330	Up	0.283683	0.0878412	0.00185792
ISC/EB-1	LOC23687450	AAEL017030	Up	0.282355	0.0781742	0.00134706
ISC/EB-1	LOC23687450	AAEL017030	Up	0.282355	0.0781742	0.00134706
ISC/EB-1	LOC5578604	AAEL021931	Up	0.276122	0.113048	0.015197
ISC/EB-1	LOC5578604	AAEL021931	Up	0.276122	0.113048	0.015197
ISC/EB-1	LOC5574109	AAEL002263	Up	0.265399	0.0823095	0.0028292
ISC/EB-1	LOC5574109	AAEL002263	Up	0.265399	0.0823095	0.0028292
ISC/EB-1	LOC5568046	AAEL006483	Up	0.261921	0.0797397	0.00270199
ISC/EB-1	LOC5568046	AAEL006483	Up	0.261921	0.0797397	0.00270199
ISC/EB-1	LOC5570622	AAEL008428	Up	0.261441	0.0603649	0.000594499
ISC/EB-1	LOC5570622	AAEL008428	Up	0.261441	0.0603649	0.000594499
ISC/EB-1	LOC5574655	AAEL022570	Up	0.259875	0.0573344	0.000364293
ISC/EB-1	LOC5574655	AAEL022570	Up	0.259875	0.0573344	0.000364293
ISC/EB-1	LOC110679018	AAEL020147	Up	0.257814	0.128832	0.0473905
ISC/EB-1	LOC110679018	AAEL020147	Up	0.257814	0.128832	0.0473905
ISC/EB-1	LOC5578882	AAEL013885	Up	0.251476	0.0797832	0.0036023
ISC/EB-1	LOC5578882	AAEL013885	Up	0.251476	0.0797832	0.0036023
ISC/EB-1	LOC5569222	AAEL007494	Up	0.243912	0.111315	0.0263947
ISC/EB-1	LOC5569222	AAEL007494	Up	0.243912	0.111315	0.0263947
ISC/EB-1	LOC5567396	AAEL006053	Up	0.235595	0.0808055	0.00519896
ISC/EB-1	LOC5567396	AAEL006053	Up	0.235595	0.0808055	0.00519896
ISC/EB-1	LOC5574190	AAEL002308	Up	0.229482	0.0667874	0.00243744
ISC/EB-1	LOC5574190	AAEL002308	Up	0.229482	0.0667874	0.00243744
ISC/EB-1	LOC110677685	AAEL023769	Up	0.228768	0.0855213	0.0079984
ISC/EB-1	LOC110677685	AAEL023769	Up	0.228768	0.0855213	0.0079984
ISC/EB-1	LOC5572257	AAEL009680	Up	0.223621	0.106088	0.0365927
ISC/EB-1	LOC5572257	AAEL009680	Up	0.223621	0.106088	0.0365927
ISC/EB-1	CFI06_mgp11	-	Up	0.216416	0.0250008	2.98e-05
ISC/EB-1	CFI06_mgp11	-	Up	0.216416	0.0250008	2.98356e-05
ISC/EB-1	LOC5576330	AAEL019728	Up	0.212661	0.0655746	0.00312807
ISC/EB-1	LOC5576330	AAEL019728	Up	0.212661	0.0655746	0.00312807
ISC/EB-1	LOC5576468	AAEL002903	Up	0.189767	0.0882572	0.0307938
ISC/EB-1	LOC5576468	AAEL002903	Up	0.189767	0.0882572	0.0307938
ISC/EB-1	LOC5569681	AAEL007818	Up	0.177932	0.0381378	0.00022963
ISC/EB-1	LOC5569681	AAEL007818	Up	0.177932	0.0381378	0.00022963
ISC/EB-1	LOC5564259	AAEL022285	Up	0.173154	0.0462618	0.00167123
ISC/EB-1	LOC5564259	AAEL022285	Up	0.173154	0.0462618	0.00167123
ISC/EB-1	LOC5563695	AAEL000549	Up	0.17092	0.0333668	0.000193178
ISC/EB-1	LOC5563695	AAEL000549	Up	0.17092	0.0333668	0.000193178
ISC/EB-1	LOC5571186	AAEL029013	Up	0.165047	0.0620705	0.00819836
ISC/EB-1	LOC5571186	AAEL029013	Up	0.165047	0.0620705	0.00819836
ISC/EB-1	LOC5566497		Up	0.162957	0.0357588	0.000453301
ISC/EB-1	LOC5566497		Up	0.162957	0.0357588	0.000453301
ISC/EB-1	LOC5566236	AAEL005269	Up	0.162684	0.0683274	0.0155969
ISC/EB-1	LOC5566236	AAEL005269	Up	0.162684	0.0683274	0.0155969
ISC/EB-1	LOC5571609	AAEL009201	Up	0.161296	0.0548297	0.00279944
ISC/EB-1	LOC5571609	AAEL009201	Up	0.161296	0.0548297	0.00279944
ISC/EB-1	LOC5568078	AAEL006509	Up	0.160028	0.0616838	0.00939812
ISC/EB-1	LOC5568078	AAEL006509	Up	0.160028	0.0616838	0.00939812
ISC/EB-1	CFI06_mgr02	-	Up	0.157291	0.0176902	3.79006e-06
ISC/EB-1	CFI06_mgr02	-	Up	0.157291	0.0176902	3.79e-06
ISC/EB-1	LOC5575790	AAEL012062	Up	0.147149	0.0590258	0.0141972
ISC/EB-1	LOC5575790	AAEL012062	Up	0.147149	0.0590258	0.0141972
ISC/EB-1	LOC5564931	AAEL004503	Up	0.146569	0.0227755	0.000108967
ISC/EB-1	LOC5564931	AAEL004503	Up	0.146569	0.0227755	0.000108967
ISC/EB-1	LOC5567214	AAEL028205	Up	0.145605	0.0689263	0.0329934
ISC/EB-1	LOC5567214	AAEL028205	Up	0.145605	0.0689263	0.0329934
ISC/EB-1	LOC5571735	AAEL009257	Up	0.136195	0.0594023	0.0229954
ISC/EB-1	LOC5571735	AAEL009257	Up	0.136195	0.0594023	0.0229954
ISC/EB-1	LOC110675128	AAEL026302	Up	0.115969	0.0335698	0.00188235
ISC/EB-1	LOC110675128	AAEL026302	Up	0.115969	0.0335698	0.00188235
ISC/EB-1	LOC5576966	AAEL003060	Up	0.111977	0.037757	0.00359928
ISC/EB-1	LOC5576966	AAEL003060	Up	0.111977	0.037757	0.00359928
ISC/EB-1	LOC5575450	AAEL002639	Up	0.107739	0.0185701	9.46932e-05
ISC/EB-1	LOC5575450	AAEL002639	Up	0.107739	0.0185701	9.47e-05
ISC/EB-1	CFI06_mgp08	-	Up	0.0939509	0.0222597	0.000717904
ISC/EB-1	CFI06_mgp08	-	Up	0.0939509	0.0222597	0.000717904
ISC/EB-1	CFI06_mgp02	-	Up	0.0833695	0.0268078	0.00370307
ISC/EB-1	CFI06_mgp02	-	Up	0.0833695	0.0268078	0.00370307
ISC/EB-1	LOC5571927	AAEL020290	Up	0.0778037	0.0154768	0.000909506
ISC/EB-1	LOC5571927	AAEL020290	Up	0.0778037	0.0154768	0.000909506
ISC/EB-1	LOC5565553	AAEL022140	Up	0.0565106	0.0122289	0.00172013
ISC/EB-1	LOC5565553	AAEL022140	Up	0.0565106	0.0122289	0.00172012
ISC/EB-1	LOC5568465	AAEL006860	Up	0.0560493	0.0186444	0.00319936
ISC/EB-1	LOC5568465	AAEL006860	Up	0.0560493	0.0186444	0.00319936
ISC/EB-1	LOC23687618	AAEL017198	Up	0.0414939	0.013358	0.00463703
ISC/EB-1	LOC23687618	AAEL017198	Up	0.0414939	0.013358	0.00463703
ISC/EB-1	LOC5564713	AAEL014583	Down	-0.0279179	0.0134029	0.0463907
ISC/EB-1	LOC5564713	AAEL014583	Down	-0.0279179	0.0134029	0.0463907
ISC/EB-1	LOC5563786	AAEL003942	Down	-0.041259	0.0157219	0.0121976
ISC/EB-1	LOC5563786	AAEL003942	Down	-0.041259	0.0157219	0.0121976
ISC/EB-1	LOC5564226	-	Down	-0.0501223	0.0203409	0.0183963
ISC/EB-1	LOC5564226	-	Down	-0.0501223	0.0203409	0.0183963
ISC/EB-1	LOC5569582	AAEL007771	Down	-0.0578622	0.0159847	0.0033264
ISC/EB-1	LOC5569582	AAEL007771	Down	-0.0578622	0.0159847	0.0033264
ISC/EB-1	LOC5576653	AAEL012686	Down	-0.0711322	0.015666	0.00185563
ISC/EB-1	LOC5576653	AAEL012686	Down	-0.0711322	0.015666	0.00185563
ISC/EB-1	LOC5567491	AAEL000951	Down	-0.0865113	0.0277581	0.00239952
ISC/EB-1	LOC5567491	AAEL000951	Down	-0.0865113	0.0277581	0.00239952
ISC/EB-1	LOC5574648	AAEL011288	Down	-0.0870231	0.0325696	0.004999
ISC/EB-1	LOC5574648	AAEL011288	Down	-0.0870231	0.0325696	0.004999
ISC/EB-1	LOC5574485	AAEL002372	Down	-0.0909223	0.0165261	0.00136955
ISC/EB-1	LOC5574485	AAEL002372	Down	-0.0909223	0.0165261	0.00136955
ISC/EB-1	LOC5580239	AAEL012326	Down	-0.0950699	0.0444691	0.0341932
ISC/EB-1	LOC5580239	AAEL012326	Down	-0.0950699	0.0444691	0.0341932
ISC/EB-1	LOC5578368	AAEL003530	Down	-0.104524	0.0138372	0.000737233
ISC/EB-1	LOC5578368	AAEL003530	Down	-0.104524	0.0138372	0.000737233
ISC/EB-1	LOC5567660	AAEL012740	Down	-0.112867	0.0253077	0.00196498
ISC/EB-1	LOC5567660	AAEL012740	Down	-0.112867	0.0253077	0.00196498
ISC/EB-1	LOC5576658	AAEL012681	Down	-0.114347	0.0428434	0.010198
ISC/EB-1	LOC5576658	AAEL012681	Down	-0.114347	0.0428434	0.010198
ISC/EB-1	LOC5580259	AAEL012585	Down	-0.116828	0.0173351	0.000989067
ISC/EB-1	LOC5580259	AAEL012585	Down	-0.116828	0.0173351	0.000989067
ISC/EB-1	LOC5565095	AAEL004589	Down	-0.117031	0.0439351	0.00859828
ISC/EB-1	LOC5565095	AAEL004589	Down	-0.117031	0.0439351	0.00859828
ISC/EB-1	LOC5571846	AAEL023681	Down	-0.121873	0.0159212	0.000570606
ISC/EB-1	LOC5571846	AAEL023681	Down	-0.121873	0.0159212	0.000570606
ISC/EB-1	LOC5574866	AAEL011471	Down	-0.124628	0.0138561	0.00039649
ISC/EB-1	LOC5574866	AAEL011471	Down	-0.124628	0.0138561	0.00039649
ISC/EB-1	LOC5570675	AAEL008481	Down	-0.129276	0.0152189	0.00074418
ISC/EB-1	LOC5570675	AAEL008481	Down	-0.129276	0.0152189	0.00074418
ISC/EB-1	LOC110677764	AAEL024434	Down	-0.129421	0.0152488	0.000524442
ISC/EB-1	LOC110677764	AAEL024434	Down	-0.129421	0.0152488	0.000524442
ISC/EB-1	LOC5574526	AAEL011197	Down	-0.133437	0.023981	0.00010621
ISC/EB-1	LOC5574526	AAEL011197	Down	-0.133437	0.023981	0.00010621
ISC/EB-1	LOC5575037	AAEL011587	Down	-0.137345	0.0157551	0.000664954
ISC/EB-1	LOC5575037	AAEL011587	Down	-0.137345	0.0157551	0.000664954
ISC/EB-1	LOC5568260	AAEL006698	Down	-0.137374	0.0152377	0.000188317
ISC/EB-1	LOC5568260	AAEL006698	Down	-0.137374	0.0152377	0.000188317
ISC/EB-1	LOC5563590	AAEL000032	Down	-0.138301	0.0200569	0.000120716
ISC/EB-1	LOC5563590	AAEL000032	Down	-0.138301	0.0200569	0.000120716
ISC/EB-1	LOC5578155	AAEL013533	Down	-0.138528	0.0316794	0.000515907
ISC/EB-1	LOC5578155	AAEL013533	Down	-0.138528	0.0316794	0.000515907
ISC/EB-1	LOC5565624	AAEL014292	Down	-0.138857	0.0176471	0.000543635
ISC/EB-1	LOC5565624	AAEL014292	Down	-0.138857	0.0176471	0.000543635
ISC/EB-1	LOC5570432	AAEL008329	Down	-0.138899	0.0169379	0.000646029
ISC/EB-1	LOC5570432	AAEL008329	Down	-0.138899	0.0169379	0.000646029
ISC/EB-1	LOC5580030	AAEL009653	Down	-0.139004	0.0164072	1.13031e-05
ISC/EB-1	LOC5580030	AAEL009653	Down	-0.139004	0.0164072	1.13e-05
ISC/EB-1	LOC23687839	AAEL017419	Down	-0.140622	0.0452165	0.00279944
ISC/EB-1	LOC23687839	AAEL017419	Down	-0.140622	0.0452165	0.00279944
ISC/EB-1	LOC5577113	AAEL008697	Down	-0.141562	0.0546085	0.0105979
ISC/EB-1	LOC5577113	AAEL008697	Down	-0.141562	0.0546085	0.0105979
ISC/EB-1	LOC5569750	AAEL007915	Down	-0.14278	0.0597444	0.0179964
ISC/EB-1	LOC5569750	AAEL007915	Down	-0.14278	0.0597444	0.0179964
ISC/EB-1	LOC5565541	AAEL004829	Down	-0.14331	0.0692197	0.0375925
ISC/EB-1	LOC5565541	AAEL004829	Down	-0.14331	0.0692197	0.0375925
ISC/EB-1	LOC5575273	AAEL011742	Down	-0.145631	0.0576439	0.0137972
ISC/EB-1	LOC5575273	AAEL011742	Down	-0.145631	0.0576439	0.0137972
ISC/EB-1	LOC5577566	AAEL013272	Down	-0.147057	0.0169206	1.87e-05
ISC/EB-1	LOC5577566	AAEL013272	Down	-0.147057	0.0169206	1.86804e-05
ISC/EB-1	LOC5573827	AAEL010756	Down	-0.14756	0.0150137	0.000166353
ISC/EB-1	LOC5573827	AAEL010756	Down	-0.14756	0.0150137	0.000166353
ISC/EB-1	LOC5564636	AAEL004378	Down	-0.148521	0.0545566	0.00739852
ISC/EB-1	LOC5564636	AAEL004378	Down	-0.148521	0.0545566	0.00739852
ISC/EB-1	LOC5579871	AAEL005985	Down	-0.148528	0.0754618	0.0479904
ISC/EB-1	LOC5579871	AAEL005985	Down	-0.148528	0.0754618	0.0479904
ISC/EB-1	LOC5569529	AAEL007699	Down	-0.152778	0.0149499	0.000431182
ISC/EB-1	LOC5569529	AAEL007699	Down	-0.152778	0.0149499	0.000431182
ISC/EB-1	LOC23687936	AAEL017516	Down	-0.155334	0.0166563	0.00039708
ISC/EB-1	LOC23687936	AAEL017516	Down	-0.155334	0.0166563	0.00039708
ISC/EB-1	LOC5578123	AAEL003427	Down	-0.1558	0.0123327	0.000235546
ISC/EB-1	LOC5578123	AAEL003427	Down	-0.1558	0.0123327	0.000235546
ISC/EB-1	LOC5571596	AAEL009185	Down	-0.157004	0.0746341	0.0417916
ISC/EB-1	LOC5571596	AAEL009185	Down	-0.157004	0.0746341	0.0417916
ISC/EB-1	LOC5577524	AAEL003203	Down	-0.162162	0.0661668	0.0175965
ISC/EB-1	LOC5577524	AAEL003203	Down	-0.162162	0.0661668	0.0175965
ISC/EB-1	LOC5570243	AAEL008192	Down	-0.163279	0.0197224	2.41e-05
ISC/EB-1	LOC5570243	AAEL008192	Down	-0.163279	0.0197224	2.40712e-05
ISC/EB-1	LOC5566959	AAEL005722	Down	-0.164122	0.0160192	0.000333353
ISC/EB-1	LOC5566959	AAEL005722	Down	-0.164122	0.0160192	0.000333353
ISC/EB-1	LOC5574612	AAEL011255	Down	-0.164161	0.0783025	0.0321936
ISC/EB-1	LOC5574612	AAEL011255	Down	-0.164161	0.0783025	0.0321936
ISC/EB-1	LOC5566843	AAEL000823	Down	-0.166194	0.0152177	0.000241546
ISC/EB-1	LOC5566843	AAEL000823	Down	-0.166194	0.0152177	0.000241546
ISC/EB-1	LOC5567848	AAEL000987	Down	-0.166217	0.0144316	0.00047525
ISC/EB-1	LOC5567848	AAEL000987	Down	-0.166217	0.0144316	0.00047525
ISC/EB-1	LOC5572513	AAEL009850	Down	-0.167304	0.0633247	0.00979804
ISC/EB-1	LOC5572513	AAEL009850	Down	-0.167304	0.0633247	0.00979804
ISC/EB-1	LOC5573744	AAEL019937	Down	-0.169771	0.0745402	0.0243951
ISC/EB-1	LOC5573744	AAEL019937	Down	-0.169771	0.0745402	0.0243951
ISC/EB-1	LOC5580070	AAEL002160	Down	-0.170699	0.0751773	0.0267946
ISC/EB-1	LOC5580070	AAEL002160	Down	-0.170699	0.0751773	0.0267946
ISC/EB-1	LOC5565544	AAEL004855	Down	-0.17095	0.018129	0.000542966
ISC/EB-1	LOC5565544	AAEL004855	Down	-0.17095	0.018129	0.000542966
ISC/EB-1	LOC5579525	AAEL014562	Down	-0.171175	0.0156716	0.000417635
ISC/EB-1	LOC5579525	AAEL014562	Down	-0.171175	0.0156716	0.000417635
ISC/EB-1	LOC5578796	AAEL003675	Down	-0.1713	0.0618349	0.00619876
ISC/EB-1	LOC5578796	AAEL003675	Down	-0.1713	0.0618349	0.00619876
ISC/EB-1	LOC5569124	AAEL007385	Down	-0.173081	0.0489736	0.00385987
ISC/EB-1	LOC5569124	AAEL007385	Down	-0.173081	0.0489736	0.00385987
ISC/EB-1	LOC5572968	AAEL010168	Down	-0.173317	0.01874	1.34e-05
ISC/EB-1	LOC5572968	AAEL010168	Down	-0.173317	0.01874	1.33505e-05
ISC/EB-1	LOC5569745	AAEL007883	Down	-0.175377	0.05952	0.0029994
ISC/EB-1	LOC5569745	AAEL007883	Down	-0.175377	0.05952	0.0029994
ISC/EB-1	LOC5573751	AAEL000294	Down	-0.175719	0.0761668	0.0223955
ISC/EB-1	LOC5573751	AAEL000294	Down	-0.175719	0.0761668	0.0223955
ISC/EB-1	LOC5568436	AAEL012661	Down	-0.177021	0.0481303	0.00101143
ISC/EB-1	LOC5568436	AAEL012661	Down	-0.177021	0.0481303	0.00101142
ISC/EB-1	LOC5576896	AAEL003039	Down	-0.177527	0.0544374	0.00187851
ISC/EB-1	LOC5576896	AAEL003039	Down	-0.177527	0.0544374	0.00187852
ISC/EB-1	LOC5570139	AAEL008103	Down	-0.177711	0.0152423	0.000538677
ISC/EB-1	LOC5570139	AAEL008103	Down	-0.177711	0.0152423	0.000538677
ISC/EB-1	LOC5570465	AAEL026904	Down	-0.179062	0.0284083	3.58012e-05
ISC/EB-1	LOC5570465	AAEL026904	Down	-0.179062	0.0284083	3.58e-05
ISC/EB-1	LOC5565266	AAEL004699	Down	-0.179145	0.0759852	0.0205959
ISC/EB-1	LOC5565266	AAEL004699	Down	-0.179145	0.0759852	0.0205959
ISC/EB-1	LOC5576214	AAEL002827	Down	-0.179375	0.0710524	0.010198
ISC/EB-1	LOC5576214	AAEL002827	Down	-0.179375	0.0710524	0.010198
ISC/EB-1	LOC5570244	AAEL008188	Down	-0.1852	0.0138818	0.000208025
ISC/EB-1	LOC5570244	AAEL008188	Down	-0.1852	0.0138818	0.000208025
ISC/EB-1	LOC5567341	AAEL006011	Down	-0.186342	0.0398412	0.000260034
ISC/EB-1	LOC5567341	AAEL006011	Down	-0.186342	0.0398412	0.000260034
ISC/EB-1	LOC5573968	AAEL010823	Down	-0.188581	0.0738821	0.0135973
ISC/EB-1	LOC5573968	AAEL010823	Down	-0.188581	0.0738821	0.0135973
ISC/EB-1	LOC5573413	AAEL002047	Down	-0.189111	0.0164912	0.000369153
ISC/EB-1	LOC5573413	AAEL002047	Down	-0.189111	0.0164912	0.000369153
ISC/EB-1	LOC5569514	AAEL007702	Down	-0.189992	0.0693831	0.00719856
ISC/EB-1	LOC5569514	AAEL007702	Down	-0.189992	0.0693831	0.00719856
ISC/EB-1	LOC5565701	AAEL014944	Down	-0.190429	0.049711	0.00287754
ISC/EB-1	LOC5565701	AAEL014944	Down	-0.190429	0.049711	0.00287754
ISC/EB-1	LOC5580325	AAEL013068	Down	-0.190469	0.0705197	0.0069986
ISC/EB-1	LOC5580325	AAEL013068	Down	-0.190469	0.0705197	0.0069986
ISC/EB-1	LOC5577042	AAEL012964	Down	-0.190916	0.0406244	0.000321747
ISC/EB-1	LOC5577042	AAEL012964	Down	-0.190916	0.0406244	0.000321747
ISC/EB-1	LOC5577478	AAEL013221	Down	-0.191249	0.0139304	0.000250159
ISC/EB-1	LOC5577478	AAEL013221	Down	-0.191249	0.0139304	0.000250159
ISC/EB-1	LOC5578313	AAEL013625	Down	-0.191614	0.0178637	0.000458369
ISC/EB-1	LOC5578313	AAEL013625	Down	-0.191614	0.0178637	0.000458369
ISC/EB-1	LOC23687432	AAEL017012	Down	-0.194163	0.0921608	0.0385923
ISC/EB-1	LOC23687432	AAEL017012	Down	-0.194163	0.0921608	0.0385923
ISC/EB-1	LOC5571093	AAEL008801	Down	-0.194412	0.0621993	0.00288405
ISC/EB-1	LOC5571093	AAEL008801	Down	-0.194412	0.0621993	0.00288405
ISC/EB-1	LOC5574844	AAEL011447	Down	-0.197366	0.0142381	0.00029403
ISC/EB-1	LOC5574844	AAEL011447	Down	-0.197366	0.0142381	0.00029403
ISC/EB-1	LOC5573211	AAEL010318	Down	-0.199365	0.0264767	9.28078e-05
ISC/EB-1	LOC5573211	AAEL010318	Down	-0.199365	0.0264767	9.28e-05
ISC/EB-1	LOC5578401	AAEL013689	Down	-0.20033	0.0858247	0.0181964
ISC/EB-1	LOC5578401	AAEL013689	Down	-0.20033	0.0858247	0.0181964
ISC/EB-1	LOC5569310	AAEL007549	Down	-0.200383	0.073609	0.0089982
ISC/EB-1	LOC5569310	AAEL007549	Down	-0.200383	0.073609	0.0089982
ISC/EB-1	LOC5566772	AAEL005629	Down	-0.2005	0.0133797	0.000229504
ISC/EB-1	LOC5566772	AAEL005629	Down	-0.2005	0.0133797	0.000229504
ISC/EB-1	LOC5571084	AAEL008789	Down	-0.201578	0.0602485	0.00247547
ISC/EB-1	LOC5571084	AAEL008789	Down	-0.201578	0.0602485	0.00247546
ISC/EB-1	LOC5566484	AAEL005401	Down	-0.203222	0.076854	0.0105979
ISC/EB-1	LOC5566484	AAEL005401	Down	-0.203222	0.076854	0.0105979
ISC/EB-1	LOC5575696	AAEL012010	Down	-0.203254	0.0965811	0.0377924
ISC/EB-1	LOC5575696	AAEL012010	Down	-0.203254	0.0965811	0.0377924
ISC/EB-1	LOC5568076	AAEL006520	Down	-0.203675	0.0883057	0.0215957
ISC/EB-1	LOC5568076	AAEL006520	Down	-0.203675	0.0883057	0.0215957
ISC/EB-1	LOC5576046	AAEL014932	Down	-0.203752	0.0323106	0.000151418
ISC/EB-1	LOC5576046	AAEL014932	Down	-0.203752	0.0323106	0.000151418
ISC/EB-1	LOC5570233	AAEL008166	Down	-0.203988	0.0768513	0.00859828
ISC/EB-1	LOC5570233	AAEL008166	Down	-0.203988	0.0768513	0.00859828
ISC/EB-1	LOC5572365	AAEL009747	Down	-0.204011	0.0178195	0.000269164
ISC/EB-1	LOC5572365	AAEL009747	Down	-0.204011	0.0178195	0.000269164
ISC/EB-1	LOC5573328	AAEL010411	Down	-0.204895	0.0650126	0.00284761
ISC/EB-1	LOC5573328	AAEL010411	Down	-0.204895	0.0650126	0.00284761
ISC/EB-1	LOC5577458	AAEL013207	Down	-0.204924	0.0923677	0.0289942
ISC/EB-1	LOC5577458	AAEL013207	Down	-0.204924	0.0923677	0.0289942
ISC/EB-1	LOC5572759	AAEL010017	Down	-0.207204	0.0709638	0.00339932
ISC/EB-1	LOC5572759	AAEL010017	Down	-0.207204	0.0709638	0.00339932
ISC/EB-1	LOC5567070	AAEL005817	Down	-0.207397	0.0153952	0.000239625
ISC/EB-1	LOC5567070	AAEL005817	Down	-0.207397	0.0153952	0.000239625
ISC/EB-1	LOC5577034	AAEL012944	Down	-0.210343	0.0158716	0.000301622
ISC/EB-1	LOC5577034	AAEL012944	Down	-0.210343	0.0158716	0.000301622
ISC/EB-1	LOC5573217	AAEL010299	Down	-0.212719	0.0155284	0.000308883
ISC/EB-1	LOC5573217	AAEL010299	Down	-0.212719	0.0155284	0.000308883
ISC/EB-1	LOC5572090	AAEL009496	Down	-0.21274	0.0184125	0.000261624
ISC/EB-1	LOC5572090	AAEL009496	Down	-0.21274	0.0184125	0.000261624
ISC/EB-1	LOC5564567	AAEL014516	Down	-0.214544	0.0564012	0.00115653
ISC/EB-1	LOC5564567	AAEL014516	Down	-0.214544	0.0564012	0.00115653
ISC/EB-1	LOC5576215	AAEL002832	Down	-0.2153	0.0114848	0.000164312
ISC/EB-1	LOC5576215	AAEL002832	Down	-0.2153	0.0114848	0.000164312
ISC/EB-1	LOC5563646	AAEL021083	Down	-0.216014	0.0136933	0.000237675
ISC/EB-1	LOC5563646	AAEL021083	Down	-0.216014	0.0136933	0.000237675
ISC/EB-1	LOC5576758	AAEL025553	Down	-0.216682	0.0166346	0.00037364
ISC/EB-1	LOC5576758	AAEL025553	Down	-0.216682	0.0166346	0.00037364
ISC/EB-1	LOC5573249	AAEL010340	Down	-0.217495	0.10871	0.0475905
ISC/EB-1	LOC5573249	AAEL010340	Down	-0.217495	0.10871	0.0475905
ISC/EB-1	LOC5574515	AAEL019717	Down	-0.218477	0.0342387	8.17908e-05
ISC/EB-1	LOC5574515	AAEL019717	Down	-0.218477	0.0342387	8.18e-05
ISC/EB-1	LOC5570313	AAEL008248	Down	-0.218656	0.090864	0.0193961
ISC/EB-1	LOC5570313	AAEL008248	Down	-0.218656	0.090864	0.0193961
ISC/EB-1	LOC5564047	AAEL004071	Down	-0.219185	0.0872143	0.0163967
ISC/EB-1	LOC5564047	AAEL004071	Down	-0.219185	0.0872143	0.0163967
ISC/EB-1	LOC5572725	AAEL009994	Down	-0.219228	0.0233591	8.29383e-05
ISC/EB-1	LOC5572725	AAEL009994	Down	-0.219228	0.0233591	8.29e-05
ISC/EB-1	LOC5569212	AAEL019885	Down	-0.21999	0.102169	0.0355929
ISC/EB-1	LOC5569212	AAEL019885	Down	-0.21999	0.102169	0.0355929
ISC/EB-1	LOC5573763	AAEL000269	Down	-0.220029	0.0294698	0.000112173
ISC/EB-1	LOC5573763	AAEL000269	Down	-0.220029	0.0294698	0.000112173
ISC/EB-1	LOC5565979	AAEL005097	Down	-0.220098	0.0180937	0.000162934
ISC/EB-1	LOC5565979	AAEL005097	Down	-0.220098	0.0180937	0.000162934
ISC/EB-1	LOC110675611	AAEL026833	Down	-0.223209	0.0598904	0.00125082
ISC/EB-1	LOC110675611	AAEL026833	Down	-0.223209	0.0598904	0.00125082
ISC/EB-1	LOC5565629	AAEL014913	Down	-0.223596	0.0805419	0.00659868
ISC/EB-1	LOC5565629	AAEL014913	Down	-0.223596	0.0805419	0.00659868
ISC/EB-1	LOC5576744	AAEL024536	Down	-0.224037	0.0151216	0.000364108
ISC/EB-1	LOC5576744	AAEL024536	Down	-0.224037	0.0151216	0.000364108
ISC/EB-1	LOC5569338	AAEL007546	Down	-0.22412	0.0672325	0.0026139
ISC/EB-1	LOC5569338	AAEL007546	Down	-0.22412	0.0672325	0.0026139
ISC/EB-1	LOC5578243	AAEL015006	Down	-0.224694	0.0140122	0.000206127
ISC/EB-1	LOC5578243	AAEL015006	Down	-0.224694	0.0140122	0.000206127
ISC/EB-1	LOC5580010	AAEL009637	Down	-0.224719	0.0812544	0.0069986
ISC/EB-1	LOC5580010	AAEL009637	Down	-0.224719	0.0812544	0.0069986
ISC/EB-1	LOC110675493	AAEL028043	Down	-0.225169	0.0160431	0.00020611
ISC/EB-1	LOC110675493	AAEL028043	Down	-0.225169	0.0160431	0.00020611
ISC/EB-1	LOC5567163	AAEL005901	Down	-0.225734	0.0202506	0.000416431
ISC/EB-1	LOC5567163	AAEL005901	Down	-0.225734	0.0202506	0.000416431
ISC/EB-1	LOC5572284	AAEL001759	Down	-0.225903	0.0150429	0.000163824
ISC/EB-1	LOC5572284	AAEL001759	Down	-0.225903	0.0150429	0.000163824
ISC/EB-1	LOC5576170	AAEL012359	Down	-0.226346	0.0494869	0.000607328
ISC/EB-1	LOC5576170	AAEL012359	Down	-0.226346	0.0494869	0.000607328
ISC/EB-1	LOC5568784	AAEL007135	Down	-0.227007	0.0731202	0.00343042
ISC/EB-1	LOC5568784	AAEL007135	Down	-0.227007	0.0731202	0.00343042
ISC/EB-1	LOC5565892	AAEL000713	Down	-0.22718	0.0853515	0.00839832
ISC/EB-1	LOC5565892	AAEL000713	Down	-0.22718	0.0853515	0.00839832
ISC/EB-1	LOC5564781	AAEL004419	Down	-0.227205	0.107274	0.0359928
ISC/EB-1	LOC5564781	AAEL004419	Down	-0.227205	0.107274	0.0359928
ISC/EB-1	LOC5578507	AAEL013715	Down	-0.228205	0.10341	0.0313937
ISC/EB-1	LOC5578507	AAEL013715	Down	-0.228205	0.10341	0.0313937
ISC/EB-1	LOC5566847	AAEL000795	Down	-0.228905	0.030639	0.000128943
ISC/EB-1	LOC5566847	AAEL000795	Down	-0.228905	0.030639	0.000128943
ISC/EB-1	LOC5569531	AAEL007715	Down	-0.230515	0.0167829	0.000209917
ISC/EB-1	LOC5569531	AAEL007715	Down	-0.230515	0.0167829	0.000209917
ISC/EB-1	LOC5578625	AAEL003582	Down	-0.231369	0.016924	2.6537e-06
ISC/EB-1	LOC5578625	AAEL003582	Down	-0.231369	0.016924	2.65e-06
ISC/EB-1	LOC5574978	AAEL002510	Down	-0.231545	0.108436	0.0381924
ISC/EB-1	LOC5574978	AAEL002510	Down	-0.231545	0.108436	0.0381924
ISC/EB-1	LOC5574167	AAEL010977	Down	-0.232587	0.0343349	2.52463e-05
ISC/EB-1	LOC5574167	AAEL010977	Down	-0.232587	0.0343349	2.52e-05
ISC/EB-1	LOC110676232	AAEL023983	Down	-0.233152	0.0168767	0.000286664
ISC/EB-1	LOC110676232	AAEL023983	Down	-0.233152	0.0168767	0.000286664
ISC/EB-1	LOC5578388	AAEL013675	Down	-0.233365	0.0942915	0.0123975
ISC/EB-1	LOC5578388	AAEL013675	Down	-0.233365	0.0942915	0.0123975
ISC/EB-1	LOC5569604	AAEL001275	Down	-0.233426	0.115119	0.0437912
ISC/EB-1	LOC5569604	AAEL001275	Down	-0.233426	0.115119	0.0437912
ISC/EB-1	LOC5575105	AAEL011656	Down	-0.233721	0.016893	0.000329619
ISC/EB-1	LOC5575105	AAEL011656	Down	-0.233721	0.016893	0.000329619
ISC/EB-1	LOC5576650	AAEL012684	Down	-0.233971	0.0812803	0.004999
ISC/EB-1	LOC5576650	AAEL012684	Down	-0.233971	0.0812803	0.004999
ISC/EB-1	LOC5564921	AAEL004500	Down	-0.234431	0.0249458	5.49406e-05
ISC/EB-1	LOC5564921	AAEL004500	Down	-0.234431	0.0249458	5.49e-05
ISC/EB-1	LOC5577723	AAEL013359	Down	-0.235147	0.0222392	3.52e-05
ISC/EB-1	LOC5577723	AAEL013359	Down	-0.235147	0.0222392	3.52212e-05
ISC/EB-1	LOC5577289	AAEL013139	Down	-0.235282	0.0574362	0.000965385
ISC/EB-1	LOC5577289	AAEL013139	Down	-0.235282	0.0574362	0.000965385
ISC/EB-1	LOC110677665	AAEL010932	Down	-0.235609	0.0705431	0.00282877
ISC/EB-1	LOC110677665	AAEL010932	Down	-0.235609	0.0705431	0.00282877
ISC/EB-1	LOC23687516	AAEL017096	Down	-0.236733	0.0140475	0.000194746
ISC/EB-1	LOC23687516	AAEL017096	Down	-0.236733	0.0140475	0.000194746
ISC/EB-1	LOC5571564	AAEL009151	Down	-0.237327	0.0150968	0.000247507
ISC/EB-1	LOC5571564	AAEL009151	Down	-0.237327	0.0150968	0.000247507
ISC/EB-1	LOC5565270	AAEL004691	Down	-0.237362	0.082184	0.00439912
ISC/EB-1	LOC5565270	AAEL004691	Down	-0.237362	0.082184	0.00439912
ISC/EB-1	LOC5569968	AAEL020092	Down	-0.239574	0.0483891	0.000206577
ISC/EB-1	LOC5569968	AAEL020092	Down	-0.239574	0.0483891	0.000206577
ISC/EB-1	LOC5571745	AAEL009275	Down	-0.23982	0.0809564	0.00419916
ISC/EB-1	LOC5571745	AAEL009275	Down	-0.23982	0.0809564	0.00419916
ISC/EB-1	LOC5566977	AAEL005739	Down	-0.240114	0.0883135	0.0089982
ISC/EB-1	LOC5566977	AAEL005739	Down	-0.240114	0.0883135	0.0089982
ISC/EB-1	LOC5565927	AAEL005069	Down	-0.240541	0.0976663	0.0143971
ISC/EB-1	LOC5565927	AAEL005069	Down	-0.240541	0.0976663	0.0143971
ISC/EB-1	LOC5573678	AAEL010661	Down	-0.240903	0.106862	0.024995
ISC/EB-1	LOC5573678	AAEL010661	Down	-0.240903	0.106862	0.024995
ISC/EB-1	LOC5569863	AAEL007945	Down	-0.241818	0.044183	0.000224283
ISC/EB-1	LOC5569863	AAEL007945	Down	-0.241818	0.044183	0.000224283
ISC/EB-1	LOC5565962	AAEL005220	Down	-0.243823	0.0168496	0.000274931
ISC/EB-1	LOC5565962	AAEL005220	Down	-0.243823	0.0168496	0.000274931
ISC/EB-1	LOC5563592	AAEL000010	Down	-0.244294	0.0179848	4.16718e-07
ISC/EB-1	LOC5563592	AAEL000010	Down	-0.244294	0.0179848	4.17e-07
ISC/EB-1	LOC5578857	AAEL027402	Down	-0.244918	0.0710841	0.0015533
ISC/EB-1	LOC5578857	AAEL027402	Down	-0.244918	0.0710841	0.0015533
ISC/EB-1	LOC5577996	AAEL003396	Down	-0.245223	0.0136292	0.000182271
ISC/EB-1	LOC5577996	AAEL003396	Down	-0.245223	0.0136292	0.000182271
ISC/EB-1	LOC5564041	AAEL004042	Down	-0.246139	0.107004	0.0245951
ISC/EB-1	LOC5564041	AAEL004042	Down	-0.246139	0.107004	0.0245951
ISC/EB-1	LOC5567141	AAEL019742	Down	-0.246324	0.115306	0.0359928
ISC/EB-1	LOC5567141	AAEL019742	Down	-0.246324	0.115306	0.0359928
ISC/EB-1	LOC5565839	AAEL005027	Down	-0.247832	0.0770133	0.00259948
ISC/EB-1	LOC5565839	AAEL005027	Down	-0.247832	0.0770133	0.00259948
ISC/EB-1	LOC5566596	AAEL000758	Down	-0.248228	0.107031	0.0209958
ISC/EB-1	LOC5566596	AAEL000758	Down	-0.248228	0.107031	0.0209958
ISC/EB-1	LOC5572696	AAEL009964	Down	-0.250459	0.0601517	0.000838795
ISC/EB-1	LOC5572696	AAEL009964	Down	-0.250459	0.0601517	0.000838795
ISC/EB-1	LOC5568600	AAEL001102	Down	-0.252178	0.10378	0.020196
ISC/EB-1	LOC5568600	AAEL001102	Down	-0.252178	0.10378	0.020196
ISC/EB-1	LOC5573948	AAEL002183	Down	-0.252424	0.0950943	0.009998
ISC/EB-1	LOC5573948	AAEL002183	Down	-0.252424	0.0950943	0.009998
ISC/EB-1	LOC5576488	AAEL002900	Down	-0.252469	0.0916974	0.00679864
ISC/EB-1	LOC5576488	AAEL002900	Down	-0.252469	0.0916974	0.00679864
ISC/EB-1	LOC5571466	AAEL009101	Down	-0.252503	0.0574779	0.000191909
ISC/EB-1	LOC5571466	AAEL009101	Down	-0.252503	0.0574779	0.000191909
ISC/EB-1	LOC5566751	AAEL015238	Down	-0.252858	0.104231	0.0205959
ISC/EB-1	LOC5566751	AAEL015238	Down	-0.252858	0.104231	0.0205959
ISC/EB-1	LOC5565891	AAEL000706	Down	-0.254842	0.0812377	0.00262554
ISC/EB-1	LOC5565891	AAEL000706	Down	-0.254842	0.0812377	0.00262554
ISC/EB-1	LOC5567222	AAEL019724	Down	-0.256148	0.1157	0.0329934
ISC/EB-1	LOC5567222	AAEL019724	Down	-0.256148	0.1157	0.0329934
ISC/EB-1	LOC5565878	AAEL000679	Down	-0.257013	0.0862035	0.00519896
ISC/EB-1	LOC5565878	AAEL000679	Down	-0.257013	0.0862035	0.00519896
ISC/EB-1	LOC5570534	AAEL001421	Down	-0.259736	0.114559	0.025195
ISC/EB-1	LOC5570534	AAEL001421	Down	-0.259736	0.114559	0.025195
ISC/EB-1	LOC5570335	AAEL019669	Down	-0.260179	0.0415729	0.000140771
ISC/EB-1	LOC5570335	AAEL019669	Down	-0.260179	0.0415729	0.000140771
ISC/EB-1	LOC5566800	AAEL005651	Down	-0.260202	0.0685491	0.000988456
ISC/EB-1	LOC5566800	AAEL005651	Down	-0.260202	0.0685491	0.000988456
ISC/EB-1	LOC5573830	AAEL010754	Down	-0.260724	0.0408692	0.000935344
ISC/EB-1	LOC5573830	AAEL010754	Down	-0.260724	0.0408692	0.000935344
ISC/EB-1	LOC5572672	AAEL001852	Down	-0.26176	0.0660377	0.000445974
ISC/EB-1	LOC5572672	AAEL001852	Down	-0.26176	0.0660377	0.000445974
ISC/EB-1	LOC5565405	AAEL014843	Down	-0.262114	0.0551727	0.000547622
ISC/EB-1	LOC5565405	AAEL014843	Down	-0.262114	0.0551727	0.000547622
ISC/EB-1	LOC5566228	AAEL005266	Down	-0.263797	0.0148767	0.000170112
ISC/EB-1	LOC5566228	AAEL005266	Down	-0.263797	0.0148767	0.000170112
ISC/EB-1	LOC5573574	AAEL002118	Down	-0.264169	0.105697	0.0161968
ISC/EB-1	LOC5573574	AAEL002118	Down	-0.264169	0.105697	0.0161968
ISC/EB-1	LOC5570318	AAEL008257	Down	-0.265114	0.0718426	0.00118298
ISC/EB-1	LOC5570318	AAEL008257	Down	-0.265114	0.0718426	0.00118298
ISC/EB-1	LOC5574550		Down	-0.26632	0.100569	0.00919816
ISC/EB-1	LOC5574550		Down	-0.26632	0.100569	0.00919816
ISC/EB-1	LOC5580329	AAEL013069	Down	-0.266448	0.0232013	1.50247e-05
ISC/EB-1	LOC5580329	AAEL013069	Down	-0.266448	0.0232013	1.5e-05
ISC/EB-1	LOC5569518	AAEL007704	Down	-0.266639	0.119695	0.0279944
ISC/EB-1	LOC5569518	AAEL007704	Down	-0.266639	0.119695	0.0279944
ISC/EB-1	LOC110680755	AAEL011758	Down	-0.268753	0.115959	0.0233953
ISC/EB-1	LOC110680755	AAEL011758	Down	-0.268753	0.115959	0.0233953
ISC/EB-1	LOC5579045	AAEL013980	Down	-0.270043	0.0974335	0.00519896
ISC/EB-1	LOC5579045	AAEL013980	Down	-0.270043	0.0974335	0.00519896
ISC/EB-1	LOC5566092	AAEL005170	Down	-0.270347	0.0633577	0.000582102
ISC/EB-1	LOC5566092	AAEL005170	Down	-0.270347	0.0633577	0.000582102
ISC/EB-1	LOC5566289	AAEL018120	Down	-0.270449	0.0947585	0.004999
ISC/EB-1	LOC5566289	AAEL018120	Down	-0.270449	0.0947585	0.004999
ISC/EB-1	LOC5574649	AAEL011293	Down	-0.270525	0.105714	0.0109978
ISC/EB-1	LOC5574649	AAEL011293	Down	-0.270525	0.105714	0.0109978
ISC/EB-1	LOC5576244	AAEL002851	Down	-0.272049	0.0434183	0.000156528
ISC/EB-1	LOC5576244	AAEL002851	Down	-0.272049	0.0434183	0.000156528
ISC/EB-1	LOC5570913	AAEL001484	Down	-0.272094	0.0929649	0.00439912
ISC/EB-1	LOC5570913	AAEL001484	Down	-0.272094	0.0929649	0.00439912
ISC/EB-1	LOC5569180	AAEL007444	Down	-0.272733	0.0272581	1.07e-05
ISC/EB-1	LOC5569180	AAEL007444	Down	-0.272733	0.0272581	1.07042e-05
ISC/EB-1	LOC5573016	AAEL001946	Down	-0.272855	0.1209	0.0235953
ISC/EB-1	LOC5573016	AAEL001946	Down	-0.272855	0.1209	0.0235953
ISC/EB-1	LOC5564878	AAEL004457	Down	-0.273416	0.0505067	0.000121388
ISC/EB-1	LOC5564878	AAEL004457	Down	-0.273416	0.0505067	0.000121388
ISC/EB-1	LOC110676310	AAEL022493	Down	-0.273604	0.0861858	0.00239952
ISC/EB-1	LOC110676310	AAEL022493	Down	-0.273604	0.0861858	0.00239952
ISC/EB-1	LOC5574816	AAEL002464	Down	-0.273751	0.0988575	0.00819836
ISC/EB-1	LOC5574816	AAEL002464	Down	-0.273751	0.0988575	0.00819836
ISC/EB-1	LOC110677919	AAEL020749	Down	-0.274038	0.0165497	0.000222166
ISC/EB-1	LOC110677919	AAEL020749	Down	-0.274038	0.0165497	0.000222166
ISC/EB-1	LOC5572848	AAEL010068	Down	-0.275479	0.100066	0.00539892
ISC/EB-1	LOC5572848	AAEL010068	Down	-0.275479	0.100066	0.00539892
ISC/EB-1	LOC5572383	AAEL009772	Down	-0.275481	0.108857	0.0109978
ISC/EB-1	LOC5572383	AAEL009772	Down	-0.275481	0.108857	0.0109978
ISC/EB-1	LOC5564392	AAEL004234	Down	-0.276082	0.0796913	0.00238003
ISC/EB-1	LOC5564392	AAEL004234	Down	-0.276082	0.0796913	0.00238003
ISC/EB-1	LOC5566520	AAEL005457	Down	-0.276099	0.133181	0.0443911
ISC/EB-1	LOC5566520	AAEL005457	Down	-0.276099	0.133181	0.0443911
ISC/EB-1	LOC5577291	AAEL013144	Down	-0.276351	0.0675433	0.000776238
ISC/EB-1	LOC5577291	AAEL013144	Down	-0.276351	0.0675433	0.000776238
ISC/EB-1	LOC5567637	AAEL006224	Down	-0.277429	0.133607	0.039792
ISC/EB-1	LOC5567637	AAEL006224	Down	-0.277429	0.133607	0.039792
ISC/EB-1	LOC5564962	AAEL014889	Down	-0.278056	0.126774	0.0313937
ISC/EB-1	LOC5564962	AAEL014889	Down	-0.278056	0.126774	0.0313937
ISC/EB-1	LOC5568481	AAEL006879	Down	-0.27837	0.11379	0.0181964
ISC/EB-1	LOC5568481	AAEL006879	Down	-0.27837	0.11379	0.0181964
ISC/EB-1	LOC5573974	AAEL010821	Down	-0.278788	0.0175767	0.00027089
ISC/EB-1	LOC5573974	AAEL010821	Down	-0.278788	0.0175767	0.00027089
ISC/EB-1	LOC5573885	AAEL010798	Down	-0.278921	0.0994943	0.00639872
ISC/EB-1	LOC5573885	AAEL010798	Down	-0.278921	0.0994943	0.00639872
ISC/EB-1	LOC5573038	AAEL025993	Down	-0.279161	0.138123	0.04979
ISC/EB-1	LOC5573038	AAEL025993	Down	-0.279161	0.138123	0.04979
ISC/EB-1	LOC5572463	AAEL001798	Down	-0.279943	0.103496	0.00859828
ISC/EB-1	LOC5572463	AAEL001798	Down	-0.279943	0.103496	0.00859828
ISC/EB-1	LOC5564924	AAEL023756	Down	-0.281135	0.12912	0.0313937
ISC/EB-1	LOC5564924	AAEL023756	Down	-0.281135	0.12912	0.0313937
ISC/EB-1	LOC5568302	AAEL006741	Down	-0.282563	0.0648486	0.000593894
ISC/EB-1	LOC5568302	AAEL006741	Down	-0.282563	0.0648486	0.000593894
ISC/EB-1	LOC5574976	AAEL002501	Down	-0.28345	0.106044	0.00679864
ISC/EB-1	LOC5574976	AAEL002501	Down	-0.28345	0.106044	0.00679864
ISC/EB-1	LOC5569288	AAEL007547	Down	-0.283537	0.102068	0.00439912
ISC/EB-1	LOC5569288	AAEL007547	Down	-0.283537	0.102068	0.00439912
ISC/EB-1	LOC5570746	AAEL008542	Down	-0.283908	0.125345	0.0283943
ISC/EB-1	LOC5570746	AAEL008542	Down	-0.283908	0.125345	0.0283943
ISC/EB-1	LOC5564860	AAEL004472	Down	-0.284278	0.105941	0.0123975
ISC/EB-1	LOC5564860	AAEL004472	Down	-0.284278	0.105941	0.0123975
ISC/EB-1	LOC5574592	AAEL002411	Down	-0.284961	0.0750374	0.000774077
ISC/EB-1	LOC5574592	AAEL002411	Down	-0.284961	0.0750374	0.000774077
ISC/EB-1	LOC5569076	AAEL001216	Down	-0.285247	0.0978809	0.00419916
ISC/EB-1	LOC5569076	AAEL001216	Down	-0.285247	0.0978809	0.00419916
ISC/EB-1	LOC5571304	AAEL008953	Down	-0.285427	0.0532786	0.000212906
ISC/EB-1	LOC5571304	AAEL008953	Down	-0.285427	0.0532786	0.000212906
ISC/EB-1	LOC5578686	AAEL003634	Down	-0.285449	0.121706	0.0205959
ISC/EB-1	LOC5578686	AAEL003634	Down	-0.285449	0.121706	0.0205959
ISC/EB-1	LOC5576345	AAEL002866	Down	-0.287706	0.117036	0.0127974
ISC/EB-1	LOC5576345	AAEL002866	Down	-0.287706	0.117036	0.0127974
ISC/EB-1	LOC110678734	AAEL019403	Down	-0.288266	0.0181112	0.000125344
ISC/EB-1	LOC110678734	AAEL019403	Down	-0.288266	0.0181112	0.000125344
ISC/EB-1	LOC5571173	AAEL008871	Down	-0.288352	0.121216	0.0215957
ISC/EB-1	LOC5571173	AAEL008871	Down	-0.288352	0.121216	0.0215957
ISC/EB-1	LOC5573372	AAEL010467	Down	-0.288916	0.0940678	0.00239952
ISC/EB-1	LOC5573372	AAEL010467	Down	-0.288916	0.0940678	0.00239952
ISC/EB-1	LOC5570509	AAEL001432	Down	-0.289261	0.0870846	0.00375308
ISC/EB-1	LOC5570509	AAEL001432	Down	-0.289261	0.0870846	0.00375308
ISC/EB-1	LOC5578207	AAEL003462	Down	-0.289324	0.0872701	0.0029994
ISC/EB-1	LOC5578207	AAEL003462	Down	-0.289324	0.0872701	0.0029994
ISC/EB-1	LOC5576740	AAEL025250	Down	-0.289897	0.131904	0.0295941
ISC/EB-1	LOC5576740	AAEL025250	Down	-0.289897	0.131904	0.0295941
ISC/EB-1	LOC5575278	AAEL011741	Down	-0.292913	0.0555849	0.000357039
ISC/EB-1	LOC5575278	AAEL011741	Down	-0.292913	0.0555849	0.000357039
ISC/EB-1	LOC5577287	AAEL019986	Down	-0.294436	0.119503	0.0163967
ISC/EB-1	LOC5577287	AAEL019986	Down	-0.294436	0.119503	0.0163967
ISC/EB-1	LOC5568090	AAEL006511	Down	-0.29486	0.0150374	0.000173155
ISC/EB-1	LOC5568090	AAEL006511	Down	-0.29486	0.0150374	0.000173155
ISC/EB-1	LOC5572193	AAEL009604	Down	-0.294968	0.127333	0.0215957
ISC/EB-1	LOC5572193	AAEL009604	Down	-0.294968	0.127333	0.0215957
ISC/EB-1	LOC5568355	AAEL001061	Down	-0.295292	0.0537851	0.00029788
ISC/EB-1	LOC5568355	AAEL001061	Down	-0.295292	0.0537851	0.00029788
ISC/EB-1	LOC5573872	AAEL010787	Down	-0.297196	0.0285645	2.64057e-05
ISC/EB-1	LOC5573872	AAEL010787	Down	-0.297196	0.0285645	2.64e-05
ISC/EB-1	LOC5574701	AAEL027910	Down	-0.297493	0.0957547	0.00382725
ISC/EB-1	LOC5574701	AAEL027910	Down	-0.297493	0.0957547	0.00382725
ISC/EB-1	LOC110675667	AAEL024853	Down	-0.298553	0.143159	0.0385923
ISC/EB-1	LOC110675667	AAEL024853	Down	-0.298553	0.143159	0.0385923
ISC/EB-1	LOC5565854	AAEL005037	Down	-0.299041	0.146825	0.0441912
ISC/EB-1	LOC5565854	AAEL005037	Down	-0.299041	0.146825	0.0441912
ISC/EB-1	LOC5569700	AAEL007845	Down	-0.300309	0.090025	0.00233234
ISC/EB-1	LOC5569700	AAEL007845	Down	-0.300309	0.090025	0.00233235
ISC/EB-1	LOC5578497	AAEL013702	Down	-0.300643	0.0901584	0.00250558
ISC/EB-1	LOC5578497	AAEL013702	Down	-0.300643	0.0901584	0.00250558
ISC/EB-1	LOC5570989	AAEL008719	Down	-0.30176	0.14616	0.0435913
ISC/EB-1	LOC5570989	AAEL008719	Down	-0.30176	0.14616	0.0435913
ISC/EB-1	LOC5565441	AAEL000641	Down	-0.304327	0.0717126	0.000467867
ISC/EB-1	LOC5565441	AAEL000641	Down	-0.304327	0.0717126	0.000467867
ISC/EB-1	LOC5568714	AAEL007042	Down	-0.304777	0.0831303	0.00131676
ISC/EB-1	LOC5568714	AAEL007042	Down	-0.304777	0.0831303	0.00131676
ISC/EB-1	LOC5574139	AAEL010954	Down	-0.304976	0.15198	0.0487902
ISC/EB-1	LOC5574139	AAEL010954	Down	-0.304976	0.15198	0.0487902
ISC/EB-1	LOC5572195	AAEL014715	Down	-0.306074	0.0681576	0.000836697
ISC/EB-1	LOC5572195	AAEL014715	Down	-0.306074	0.0681576	0.000836697
ISC/EB-1	LOC5572071	AAEL001715	Down	-0.306079	0.0704948	0.000296042
ISC/EB-1	LOC5572071	AAEL001715	Down	-0.306079	0.0704948	0.000296042
ISC/EB-1	LOC5577997	AAEL003385	Down	-0.306667	0.119197	0.0155969
ISC/EB-1	LOC5577997	AAEL003385	Down	-0.306667	0.119197	0.0155969
ISC/EB-1	LOC5576572	AAEL025570	Down	-0.307086	0.125325	0.0163967
ISC/EB-1	LOC5576572	AAEL025570	Down	-0.307086	0.125325	0.0163967
ISC/EB-1	LOC5565702	AAEL014943	Down	-0.311992	0.065565	0.000415493
ISC/EB-1	LOC5565702	AAEL014943	Down	-0.311992	0.065565	0.000415493
ISC/EB-1	LOC5569309	AAEL007556	Down	-0.313178	0.139643	0.0311938
ISC/EB-1	LOC5569309	AAEL007556	Down	-0.313178	0.139643	0.0311938
ISC/EB-1	LOC5569016	AAEL007286	Down	-0.313506	0.138393	0.0317936
ISC/EB-1	LOC5569016	AAEL007286	Down	-0.313506	0.138393	0.0317936
ISC/EB-1	LOC5568261	AAEL006693	Down	-0.314895	0.14825	0.0339932
ISC/EB-1	LOC5568261	AAEL006693	Down	-0.314895	0.14825	0.0339932
ISC/EB-1	LOC5578459	AAEL000486	Down	-0.315227	0.0682457	0.000394814
ISC/EB-1	LOC5578459	AAEL000486	Down	-0.315227	0.0682457	0.000394814
ISC/EB-1	LOC5564185	AAEL014335	Down	-0.315501	0.116026	0.00679864
ISC/EB-1	LOC5564185	AAEL014335	Down	-0.315501	0.116026	0.00679864
ISC/EB-1	LOC5578582	AAEL013768	Down	-0.316447	0.150857	0.0445911
ISC/EB-1	LOC5578582	AAEL013768	Down	-0.316447	0.150857	0.0445911
ISC/EB-1	LOC5578301	AAEL013620	Down	-0.317156	0.135219	0.0177964
ISC/EB-1	LOC5578301	AAEL013620	Down	-0.317156	0.135219	0.0177964
ISC/EB-1	LOC5575800	AAEL012078	Down	-0.318991	0.0844284	0.00102618
ISC/EB-1	LOC5575800	AAEL012078	Down	-0.318991	0.0844284	0.00102618
ISC/EB-1	LOC5573855	AAEL010776	Down	-0.320206	0.146575	0.0343931
ISC/EB-1	LOC5573855	AAEL010776	Down	-0.320206	0.146575	0.0343931
ISC/EB-1	LOC5576217	AAEL029007	Down	-0.321487	0.129447	0.0141972
ISC/EB-1	LOC5576217	AAEL029007	Down	-0.321487	0.129447	0.0141972
ISC/EB-1	LOC5571289	AAEL019546	Down	-0.321595	0.140935	0.0263947
ISC/EB-1	LOC5571289	AAEL019546	Down	-0.321595	0.140935	0.0263947
ISC/EB-1	LOC5571869	-	Down	-0.322097	0.135389	0.0191962
ISC/EB-1	LOC5571869	-	Down	-0.322097	0.135389	0.0191962
ISC/EB-1	LOC5573963	AAEL010826	Down	-0.32329	0.0572375	0.000117675
ISC/EB-1	LOC5573963	AAEL010826	Down	-0.32329	0.0572375	0.000117675
ISC/EB-1	LOC5569497	AAEL007681	Down	-0.32468	0.15011	0.0381924
ISC/EB-1	LOC5569497	AAEL007681	Down	-0.32468	0.15011	0.0381924
ISC/EB-1	LOC5572335	AAEL009719	Down	-0.325038	0.134847	0.0175965
ISC/EB-1	LOC5572335	AAEL009719	Down	-0.325038	0.134847	0.0175965
ISC/EB-1	LOC5567311	AAEL005965	Down	-0.325225	0.140361	0.0203959
ISC/EB-1	LOC5567311	AAEL005965	Down	-0.325225	0.140361	0.0203959
ISC/EB-1	LOC5571789	AAEL009317	Down	-0.327353	0.1006	0.00324709
ISC/EB-1	LOC5571789	AAEL009317	Down	-0.327353	0.1006	0.00324709
ISC/EB-1	LOC5579795	AAEL003957	Down	-0.328933	0.0409303	8.16706e-05
ISC/EB-1	LOC5579795	AAEL003957	Down	-0.328933	0.0409303	8.17e-05
ISC/EB-1	LOC5568526	AAEL006946	Down	-0.332094	0.0835167	0.000849683
ISC/EB-1	LOC5568526	AAEL006946	Down	-0.332094	0.0835167	0.000849683
ISC/EB-1	LOC5570461	AAEL008356	Down	-0.332122	0.0778592	0.000597186
ISC/EB-1	LOC5570461	AAEL008356	Down	-0.332122	0.0778592	0.000597186
ISC/EB-1	LOC5572296	AAEL001767	Down	-0.332246	0.0981908	0.00150626
ISC/EB-1	LOC5572296	AAEL001767	Down	-0.332246	0.0981908	0.00150626
ISC/EB-1	LOC5574385	AAEL011090	Down	-0.332412	0.161023	0.0395921
ISC/EB-1	LOC5574385	AAEL011090	Down	-0.332412	0.161023	0.0395921
ISC/EB-1	LOC5579494	AAEL015271	Down	-0.332722	0.145216	0.0245951
ISC/EB-1	LOC5579494	AAEL015271	Down	-0.332722	0.145216	0.0245951
ISC/EB-1	LOC5571932	AAEL009387	Down	-0.333024	0.101146	0.00195663
ISC/EB-1	LOC5571932	AAEL009387	Down	-0.333024	0.101146	0.00195663
ISC/EB-1	LOC5566316	AAEL005305	Down	-0.333911	0.0858598	0.00108555
ISC/EB-1	LOC5566316	AAEL005305	Down	-0.333911	0.0858598	0.00108555
ISC/EB-1	LOC5572534	AAEL009859	Down	-0.334008	0.0352004	4.61711e-05
ISC/EB-1	LOC5572534	AAEL009859	Down	-0.334008	0.0352004	4.62e-05
ISC/EB-1	LOC5568583	AAEL001113	Down	-0.335232	0.113342	0.00339932
ISC/EB-1	LOC5568583	AAEL001113	Down	-0.335232	0.113342	0.00339932
ISC/EB-1	LOC110676045	AAEL022286	Down	-0.336258	0.0145368	8.23e-05
ISC/EB-1	LOC110676045	AAEL022286	Down	-0.336258	0.0145368	8.23157e-05
ISC/EB-1	LOC5569547	AAEL007718	Down	-0.337271	0.0702558	0.000218949
ISC/EB-1	LOC5569547	AAEL007718	Down	-0.337271	0.0702558	0.000218949
ISC/EB-1	LOC5575837	AAEL012094	Down	-0.337466	0.143193	0.0215957
ISC/EB-1	LOC5575837	AAEL012094	Down	-0.337466	0.143193	0.0215957
ISC/EB-1	LOC5567097	AAEL005839	Down	-0.337768	0.0927213	0.00138422
ISC/EB-1	LOC5567097	AAEL005839	Down	-0.337768	0.0927213	0.00138422
ISC/EB-1	LOC5574862	AAEL011468	Down	-0.338157	0.0813651	0.000602236
ISC/EB-1	LOC5574862	AAEL011468	Down	-0.338157	0.0813651	0.000602236
ISC/EB-1	LOC5565230	AAEL004653	Down	-0.338203	0.135686	0.0169966
ISC/EB-1	LOC5565230	AAEL004653	Down	-0.338203	0.135686	0.0169966
ISC/EB-1	LOC5575242	AAEL011711	Down	-0.338457	0.0467576	9.38e-05
ISC/EB-1	LOC5575242	AAEL011711	Down	-0.338457	0.0467576	9.38256e-05
ISC/EB-1	LOC110674166	AAEL020485	Down	-0.340211	0.13776	0.0169966
ISC/EB-1	LOC110674166	AAEL020485	Down	-0.340211	0.13776	0.0169966
ISC/EB-1	LOC5569048	AAEL007344	Down	-0.341506	0.104304	0.00266362
ISC/EB-1	LOC5569048	AAEL007344	Down	-0.341506	0.104304	0.00266362
ISC/EB-1	LOC5574993	AAEL002534	Down	-0.342745	0.0323404	7.64e-07
ISC/EB-1	LOC5574993	AAEL002534	Down	-0.342745	0.0323404	7.6357e-07
ISC/EB-1	LOC5577499	AAEL003193	Down	-0.343579	0.095321	0.00129971
ISC/EB-1	LOC5577499	AAEL003193	Down	-0.343579	0.095321	0.00129971
ISC/EB-1	LOC5573732	AAEL000291	Down	-0.344221	0.0557853	0.000154041
ISC/EB-1	LOC5573732	AAEL000291	Down	-0.344221	0.0557853	0.000154041
ISC/EB-1	LOC5566763	AAEL012410	Down	-0.344624	0.154388	0.0291942
ISC/EB-1	LOC5566763	AAEL012410	Down	-0.344624	0.154388	0.0291942
ISC/EB-1	LOC5580095	AAEL002137	Down	-0.345365	0.148223	0.0245951
ISC/EB-1	LOC5580095	AAEL002137	Down	-0.345365	0.148223	0.0245951
ISC/EB-1	LOC5566824	AAEL022609	Down	-0.345546	0.0654005	0.000405835
ISC/EB-1	LOC5566824	AAEL022609	Down	-0.345546	0.0654005	0.000405835
ISC/EB-1	LOC5572432	AAEL001810	Down	-0.345911	0.153495	0.0309938
ISC/EB-1	LOC5572432	AAEL001810	Down	-0.345911	0.153495	0.0309938
ISC/EB-1	LOC5577697	AAEL013334	Down	-0.346894	0.150713	0.0239952
ISC/EB-1	LOC5577697	AAEL013334	Down	-0.346894	0.150713	0.0239952
ISC/EB-1	LOC5568939	AAEL007238	Down	-0.346968	0.117733	0.00479904
ISC/EB-1	LOC5568939	AAEL007238	Down	-0.346968	0.117733	0.00479904
ISC/EB-1	LOC5570591	AAEL008408	Down	-0.348027	0.0903611	0.00112687
ISC/EB-1	LOC5570591	AAEL008408	Down	-0.348027	0.0903611	0.00112687
ISC/EB-1	LOC5567286	AAEL005946	Down	-0.350377	0.11902	0.00519896
ISC/EB-1	LOC5567286	AAEL005946	Down	-0.350377	0.11902	0.00519896
ISC/EB-1	LOC5576764	AAEL012750	Down	-0.350421	0.107792	0.00259484
ISC/EB-1	LOC5576764	AAEL012750	Down	-0.350421	0.107792	0.00259484
ISC/EB-1	LOC5573879	AAEL010801	Down	-0.350676	0.0627794	0.000263569
ISC/EB-1	LOC5573879	AAEL010801	Down	-0.350676	0.0627794	0.000263569
ISC/EB-1	LOC5576029	AAEL012262	Down	-0.352517	0.130588	0.00819836
ISC/EB-1	LOC5576029	AAEL012262	Down	-0.352517	0.130588	0.00819836
ISC/EB-1	LOC5579186	AAEL003872	Down	-0.352949	0.0204926	2.98535e-05
ISC/EB-1	LOC5579186	AAEL003872	Down	-0.352949	0.0204926	2.99e-05
ISC/EB-1	LOC5569762	AAEL025391	Down	-0.353169	0.102035	0.00268216
ISC/EB-1	LOC5569762	AAEL025391	Down	-0.353169	0.102035	0.00268216
ISC/EB-1	LOC110679492	AAEL023003	Down	-0.354397	0.0654808	0.000229782
ISC/EB-1	LOC110679492	AAEL023003	Down	-0.354397	0.0654808	0.000229782
ISC/EB-1	LOC5564556	AAEL004325	Down	-0.354654	0.0201528	0.000115782
ISC/EB-1	LOC5564556	AAEL004325	Down	-0.354654	0.0201528	0.000115782
ISC/EB-1	LOC5567647	AAEL027611	Down	-0.358312	0.133516	0.00939812
ISC/EB-1	LOC5567647	AAEL027611	Down	-0.358312	0.133516	0.00939812
ISC/EB-1	LOC5572119	AAEL009539	Down	-0.358617	0.131389	0.00839832
ISC/EB-1	LOC5572119	AAEL009539	Down	-0.358617	0.131389	0.00839832
ISC/EB-1	LOC5574458	AAEL011180	Down	-0.360943	0.0370153	0.000438908
ISC/EB-1	LOC5574458	AAEL011180	Down	-0.360943	0.0370153	0.000438908
ISC/EB-1	LOC5565754	AAEL014965	Down	-0.360983	0.153014	0.0227954
ISC/EB-1	LOC5565754	AAEL014965	Down	-0.360983	0.153014	0.0227954
ISC/EB-1	LOC5566087	AAEL005165	Down	-0.361008	0.0435879	1.88664e-05
ISC/EB-1	LOC5566087	AAEL005165	Down	-0.361008	0.0435879	1.89e-05
ISC/EB-1	LOC5563777	AAEL019599	Down	-0.361388	0.107323	0.00154222
ISC/EB-1	LOC5563777	AAEL019599	Down	-0.361388	0.107323	0.00154222
ISC/EB-1	LOC5571930	AAEL009389	Down	-0.365709	0.0792913	0.000391887
ISC/EB-1	LOC5571930	AAEL009389	Down	-0.365709	0.0792913	0.000391887
ISC/EB-1	LOC5575011	AAEL011564	Down	-0.366299	0.0918039	0.00051168
ISC/EB-1	LOC5575011	AAEL011564	Down	-0.366299	0.0918039	0.00051168
ISC/EB-1	LOC23687501	AAEL017081	Down	-0.367262	0.089038	0.000494928
ISC/EB-1	LOC23687501	AAEL017081	Down	-0.367262	0.089038	0.000494928
ISC/EB-1	LOC5578520	AAEL013723	Down	-0.368184	0.134418	0.00719856
ISC/EB-1	LOC5578520	AAEL013723	Down	-0.368184	0.134418	0.00719856
ISC/EB-1	LOC110679353	AAEL025697	Down	-0.368672	0.0788622	0.000756836
ISC/EB-1	LOC110679353	AAEL025697	Down	-0.368672	0.0788622	0.000756836
ISC/EB-1	LOC5564768	AAEL004434	Down	-0.369813	0.0544357	8.24e-05
ISC/EB-1	LOC5564768	AAEL004434	Down	-0.369813	0.0544357	8.23787e-05
ISC/EB-1	LOC5574739	AAEL011369	Down	-0.369881	0.136031	0.00839832
ISC/EB-1	LOC5574739	AAEL011369	Down	-0.369881	0.136031	0.00839832
ISC/EB-1	LOC5574614	AAEL011248	Down	-0.370257	0.102251	0.00173723
ISC/EB-1	LOC5574614	AAEL011248	Down	-0.370257	0.102251	0.00173723
ISC/EB-1	LOC5570136	AAEL008105	Down	-0.371371	0.137578	0.00739852
ISC/EB-1	LOC5570136	AAEL008105	Down	-0.371371	0.137578	0.00739852
ISC/EB-1	LOC5572982	AAEL001930	Down	-0.373072	0.131823	0.0059988
ISC/EB-1	LOC5572982	AAEL001930	Down	-0.373072	0.131823	0.0059988
ISC/EB-1	LOC5576765	AAEL012746	Down	-0.373342	0.0755449	0.00029513
ISC/EB-1	LOC5576765	AAEL012746	Down	-0.373342	0.0755449	0.00029513
ISC/EB-1	LOC5571453	AAEL009074	Down	-0.373512	0.0806381	0.000590931
ISC/EB-1	LOC5571453	AAEL009074	Down	-0.373512	0.0806381	0.000590931
ISC/EB-1	LOC5567702	AAEL006275	Down	-0.373912	0.126882	0.00419916
ISC/EB-1	LOC5567702	AAEL006275	Down	-0.373912	0.126882	0.00419916
ISC/EB-1	LOC5570214	AAEL008154	Down	-0.374445	0.121557	0.0029994
ISC/EB-1	LOC5570214	AAEL008154	Down	-0.374445	0.121557	0.0029994
ISC/EB-1	LOC5578831	AAEL013875	Down	-0.375285	0.0388556	0.000342478
ISC/EB-1	LOC5578831	AAEL013875	Down	-0.375285	0.0388556	0.000342478
ISC/EB-1	LOC5578267	AAEL003492	Down	-0.376284	0.0643803	7.31507e-05
ISC/EB-1	LOC5578267	AAEL003492	Down	-0.376284	0.0643803	7.32e-05
ISC/EB-1	LOC5578621	AAEL003599	Down	-0.380183	0.160113	0.0187962
ISC/EB-1	LOC5578621	AAEL003599	Down	-0.380183	0.160113	0.0187962
ISC/EB-1	LOC5573319	AAEL010403	Down	-0.380255	0.124436	0.00379924
ISC/EB-1	LOC5573319	AAEL010403	Down	-0.380255	0.124436	0.00379924
ISC/EB-1	LOC5564972	AAEL004523	Down	-0.380834	0.149676	0.0131974
ISC/EB-1	LOC5564972	AAEL004523	Down	-0.380834	0.149676	0.0131974
ISC/EB-1	LOC5566864	AAEL000847	Down	-0.38096	0.116267	0.00239952
ISC/EB-1	LOC5566864	AAEL000847	Down	-0.38096	0.116267	0.00239952
ISC/EB-1	LOC5570678	AAEL008473	Down	-0.383342	0.0901083	0.000689453
ISC/EB-1	LOC5570678	AAEL008473	Down	-0.383342	0.0901083	0.000689453
ISC/EB-1	LOC5575085	AAEL011641	Down	-0.386683	0.0535164	0.000109575
ISC/EB-1	LOC5575085	AAEL011641	Down	-0.386683	0.0535164	0.000109575
ISC/EB-1	LOC5566551	AAEL005471	Down	-0.387559	0.0729659	0.00042949
ISC/EB-1	LOC5566551	AAEL005471	Down	-0.387559	0.0729659	0.00042949
ISC/EB-1	LOC5566233	AAEL005258	Down	-0.387868	0.132194	0.00459908
ISC/EB-1	LOC5566233	AAEL005258	Down	-0.387868	0.132194	0.00459908
ISC/EB-1	LOC5575305	AAEL002578	Down	-0.39004	0.0982882	0.000635814
ISC/EB-1	LOC5575305	AAEL002578	Down	-0.39004	0.0982882	0.000635814
ISC/EB-1	LOC5579467	AAEL023603	Down	-0.391981	0.0989637	0.000514638
ISC/EB-1	LOC5579467	AAEL023603	Down	-0.391981	0.0989637	0.000514638
ISC/EB-1	LOC110674836	AAEL020033	Down	-0.39241	0.155864	0.0135973
ISC/EB-1	LOC110674836	AAEL020033	Down	-0.39241	0.155864	0.0135973
ISC/EB-1	LOC5575108	AAEL011665	Down	-0.395168	0.128418	0.00519896
ISC/EB-1	LOC5575108	AAEL011665	Down	-0.395168	0.128418	0.00519896
ISC/EB-1	LOC5575321	AAEL002597	Down	-0.395614	0.107541	0.000878069
ISC/EB-1	LOC5575321	AAEL002597	Down	-0.395614	0.107541	0.000878069
ISC/EB-1	LOC5578684	AAEL003645	Down	-0.397035	0.055283	2.66e-05
ISC/EB-1	LOC5578684	AAEL003645	Down	-0.397035	0.055283	2.65893e-05
ISC/EB-1	LOC5567684	AAEL006251	Down	-0.397229	0.14349	0.0069986
ISC/EB-1	LOC5567684	AAEL006251	Down	-0.397229	0.14349	0.0069986
ISC/EB-1	LOC5578156	AAEL013536	Down	-0.397248	0.0632838	0.000159929
ISC/EB-1	LOC5578156	AAEL013536	Down	-0.397248	0.0632838	0.000159929
ISC/EB-1	LOC5577268	AAEL013128	Down	-0.397738	0.109845	0.00156188
ISC/EB-1	LOC5577268	AAEL013128	Down	-0.397738	0.109845	0.00156188
ISC/EB-1	LOC5578293	AAEL022819	Down	-0.397872	0.107742	0.000858676
ISC/EB-1	LOC5578293	AAEL022819	Down	-0.397872	0.107742	0.000858676
ISC/EB-1	LOC5575338	AAEL002615	Down	-0.399021	0.0962552	0.000641271
ISC/EB-1	LOC5575338	AAEL002615	Down	-0.399021	0.0962552	0.000641271
ISC/EB-1	LOC5579108	AAEL003844	Down	-0.400387	0.0803206	0.000344819
ISC/EB-1	LOC5579108	AAEL003844	Down	-0.400387	0.0803206	0.000344819
ISC/EB-1	LOC5577061	AAEL003103	Down	-0.40087	0.0714588	4.02e-05
ISC/EB-1	LOC5577061	AAEL003103	Down	-0.40087	0.0714588	4.01752e-05
ISC/EB-1	LOC5576477	AAEL002887	Down	-0.403718	0.146157	0.00819836
ISC/EB-1	LOC5576477	AAEL002887	Down	-0.403718	0.146157	0.00819836
ISC/EB-1	LOC5565848	AAEL005038	Down	-0.406683	0.137227	0.00359928
ISC/EB-1	LOC5565848	AAEL005038	Down	-0.406683	0.137227	0.00359928
ISC/EB-1	LOC5567126	AAEL005879	Down	-0.407288	0.142315	0.0059988
ISC/EB-1	LOC5567126	AAEL005879	Down	-0.407288	0.142315	0.0059988
ISC/EB-1	LOC5571645	AAEL001636	Down	-0.408558	0.124445	0.0022537
ISC/EB-1	LOC5571645	AAEL001636	Down	-0.408558	0.124445	0.0022537
ISC/EB-1	LOC5567839	AAEL001005	Down	-0.410063	0.0650307	6.59768e-05
ISC/EB-1	LOC5567839	AAEL001005	Down	-0.410063	0.0650307	6.6e-05
ISC/EB-1	LOC5574069		Down	-0.411369	0.144729	0.00639872
ISC/EB-1	LOC5574069		Down	-0.411369	0.144729	0.00639872
ISC/EB-1	LOC5572843	AAEL010059	Down	-0.414284	0.0699565	0.000132042
ISC/EB-1	LOC5572843	AAEL010059	Down	-0.414284	0.0699565	0.000132042
ISC/EB-1	LOC5567528	AAEL006129	Down	-0.415273	0.126194	0.00247188
ISC/EB-1	LOC5567528	AAEL006129	Down	-0.415273	0.126194	0.00247188
ISC/EB-1	LOC5577568	AAEL013279	Down	-0.416988	0.0698727	5.37728e-05
ISC/EB-1	LOC5577568	AAEL013279	Down	-0.416988	0.0698727	5.38e-05
ISC/EB-1	LOC5570930	AAEL008672	Down	-0.417462	0.122186	0.00194891
ISC/EB-1	LOC5570930	AAEL008672	Down	-0.417462	0.122186	0.00194892
ISC/EB-1	LOC5568403	AAEL006820	Down	-0.418577	0.0488929	2.77422e-05
ISC/EB-1	LOC5568403	AAEL006820	Down	-0.418577	0.0488929	2.77e-05
ISC/EB-1	LOC5578378	AAEL013653	Down	-0.421775	0.127293	0.00353066
ISC/EB-1	LOC5578378	AAEL013653	Down	-0.421775	0.127293	0.00353066
ISC/EB-1	LOC5569067	AAEL001218	Down	-0.423458	0.127522	0.00281801
ISC/EB-1	LOC5569067	AAEL001218	Down	-0.423458	0.127522	0.00281801
ISC/EB-1	LOC5579041	AAEL013989	Down	-0.424508	0.0925002	0.000480391
ISC/EB-1	LOC5579041	AAEL013989	Down	-0.424508	0.0925002	0.000480391
ISC/EB-1	LOC5571783	AAEL009320	Down	-0.424606	0.0874868	0.000502624
ISC/EB-1	LOC5571783	AAEL009320	Down	-0.424606	0.0874868	0.000502624
ISC/EB-1	LOC5577719	AAEL013353	Down	-0.425549	0.0428816	4.3077e-05
ISC/EB-1	LOC5577719	AAEL013353	Down	-0.425549	0.0428816	4.31e-05
ISC/EB-1	LOC5575301	AAEL023523	Down	-0.426113	0.10354	0.00031699
ISC/EB-1	LOC5575301	AAEL023523	Down	-0.426113	0.10354	0.00031699
ISC/EB-1	LOC5566079	AAEL015064	Down	-0.426656	0.0637341	5.08122e-05
ISC/EB-1	LOC5566079	AAEL015064	Down	-0.426656	0.0637341	5.08e-05
ISC/EB-1	LOC5572836	AAEL010065	Down	-0.427437	0.130285	0.00285368
ISC/EB-1	LOC5572836	AAEL010065	Down	-0.427437	0.130285	0.00285368
ISC/EB-1	LOC5567821	AAEL000986	Down	-0.428234	0.0999687	0.0003723
ISC/EB-1	LOC5567821	AAEL000986	Down	-0.428234	0.0999687	0.0003723
ISC/EB-1	LOC5567220	AAEL000898	Down	-0.430116	0.130813	0.00208223
ISC/EB-1	LOC5567220	AAEL000898	Down	-0.430116	0.130813	0.00208223
ISC/EB-1	LOC5569438	AAEL001236	Down	-0.43028	0.138828	0.0029994
ISC/EB-1	LOC5569438	AAEL001236	Down	-0.43028	0.138828	0.0029994
ISC/EB-1	LOC5568430	AAEL006833	Down	-0.430663	0.0847883	0.000186066
ISC/EB-1	LOC5568430	AAEL006833	Down	-0.430663	0.0847883	0.000186066
ISC/EB-1	LOC5573292	AAEL010371	Down	-0.43091	0.136233	0.00343585
ISC/EB-1	LOC5573292	AAEL010371	Down	-0.43091	0.136233	0.00343585
ISC/EB-1	LOC5564552	AAEL004311	Down	-0.430949	0.134787	0.00239952
ISC/EB-1	LOC5564552	AAEL004311	Down	-0.430949	0.134787	0.00239952
ISC/EB-1	LOC5567031	AAEL005766	Down	-0.434558	0.064317	0.000144159
ISC/EB-1	LOC5567031	AAEL005766	Down	-0.434558	0.064317	0.000144159
ISC/EB-1	LOC5564296	AAEL014393	Down	-0.435652	0.144247	0.00379924
ISC/EB-1	LOC5564296	AAEL014393	Down	-0.435652	0.144247	0.00379924
ISC/EB-1	LOC5565730	AAEL025911	Down	-0.436348	0.127722	0.00133068
ISC/EB-1	LOC5565730	AAEL025911	Down	-0.436348	0.127722	0.00133068
ISC/EB-1	LOC5571227	AAEL008928	Down	-0.445946	0.155753	0.0059988
ISC/EB-1	LOC5571227	AAEL008928	Down	-0.445946	0.155753	0.0059988
ISC/EB-1	LOC5578918	AAEL003758	Down	-0.448411	0.151807	0.00459908
ISC/EB-1	LOC5578918	AAEL003758	Down	-0.448411	0.151807	0.00459908
ISC/EB-1	LOC5579472	AAEL007650	Down	-0.44972	0.0890725	0.000212039
ISC/EB-1	LOC5579472	AAEL007650	Down	-0.44972	0.0890725	0.000212039
ISC/EB-1	LOC5563673	AAEL000541	Down	-0.450419	0.082288	0.00017352
ISC/EB-1	LOC5563673	AAEL000541	Down	-0.450419	0.082288	0.00017352
ISC/EB-1	LOC5575715	AAEL012026	Down	-0.45062	0.0528475	7.22869e-06
ISC/EB-1	LOC5575715	AAEL012026	Down	-0.45062	0.0528475	7.23e-06
ISC/EB-1	LOC110679507	AAEL025552	Down	-0.4512	0.145275	0.00319936
ISC/EB-1	LOC110679507	AAEL025552	Down	-0.4512	0.145275	0.00319936
ISC/EB-1	LOC5579853	AAEL005845	Down	-0.45271	0.10758	0.000435317
ISC/EB-1	LOC5579853	AAEL005845	Down	-0.45271	0.10758	0.000435317
ISC/EB-1	LOC5576894	AAEL003046	Down	-0.455208	0.0799988	0.000163482
ISC/EB-1	LOC5576894	AAEL003046	Down	-0.455208	0.0799988	0.000163482
ISC/EB-1	LOC5573750	AAEL000275	Down	-0.45654	0.143878	0.00359928
ISC/EB-1	LOC5573750	AAEL000275	Down	-0.45654	0.143878	0.00359928
ISC/EB-1	LOC5571825	AAEL001698	Down	-0.457223	0.0863846	0.000151468
ISC/EB-1	LOC5571825	AAEL001698	Down	-0.457223	0.0863846	0.000151468
ISC/EB-1	LOC5577073	AAEL019939	Down	-0.458794	0.103426	0.000517279
ISC/EB-1	LOC5577073	AAEL019939	Down	-0.458794	0.103426	0.000517279
ISC/EB-1	LOC5573523	AAEL024184	Down	-0.459226	0.131371	0.00268811
ISC/EB-1	LOC5573523	AAEL024184	Down	-0.459226	0.131371	0.00268811
ISC/EB-1	LOC5566110	AAEL005179	Down	-0.461111	0.13972	0.00272684
ISC/EB-1	LOC5566110	AAEL005179	Down	-0.461111	0.13972	0.00272684
ISC/EB-1	LOC5569637	AAEL007778	Down	-0.462531	0.0960791	8.265e-05
ISC/EB-1	LOC5569637	AAEL007778	Down	-0.462531	0.0960791	8.26e-05
ISC/EB-1	LOC5565589	AAEL004865	Down	-0.464761	0.0438576	2.26992e-05
ISC/EB-1	LOC5565589	AAEL004865	Down	-0.464761	0.0438576	2.27e-05
ISC/EB-1	LOC5568843	AAEL007162	Down	-0.465189	0.0638695	2.81006e-05
ISC/EB-1	LOC5568843	AAEL007162	Down	-0.465189	0.0638695	2.81e-05
ISC/EB-1	LOC110676279	AAEL021140	Down	-0.466515	0.0430769	7.92e-07
ISC/EB-1	LOC110676279	AAEL021140	Down	-0.466515	0.0430769	7.9223e-07
ISC/EB-1	LOC5571141	AAEL019603	Down	-0.471556	0.144783	0.0036669
ISC/EB-1	LOC5571141	AAEL019603	Down	-0.471556	0.144783	0.0036669
ISC/EB-1	LOC110680939	AAEL004175	Down	-0.473907	0.0849315	0.000140779
ISC/EB-1	LOC110680939	AAEL004175	Down	-0.473907	0.0849315	0.000140779
ISC/EB-1	LOC5569564	AAEL025134	Down	-0.475984	0.107381	0.000603904
ISC/EB-1	LOC5569564	AAEL025134	Down	-0.475984	0.107381	0.000603904
ISC/EB-1	LOC5571763	AAEL009287	Down	-0.476564	0.0781575	0.000969268
ISC/EB-1	LOC5571763	AAEL009287	Down	-0.476564	0.0781575	0.000969268
ISC/EB-1	LOC5579929	AAEL006805	Down	-0.477269	0.141941	0.00212157
ISC/EB-1	LOC5579929	AAEL006805	Down	-0.477269	0.141941	0.00212157
ISC/EB-1	LOC5566137	AAEL005190	Down	-0.47817	0.149571	0.0029994
ISC/EB-1	LOC5566137	AAEL005190	Down	-0.47817	0.149571	0.0029994
ISC/EB-1	LOC5574404	AAEL011116	Down	-0.478484	0.0560182	0.000154924
ISC/EB-1	LOC5574404	AAEL011116	Down	-0.478484	0.0560182	0.000154924
ISC/EB-1	LOC5575238	AAEL011708	Down	-0.478548	0.0604254	2.87e-05
ISC/EB-1	LOC5575238	AAEL011708	Down	-0.478548	0.0604254	2.87122e-05
ISC/EB-1	LOC5579815	AAEL023500	Down	-0.478839	0.115029	0.000632513
ISC/EB-1	LOC5579815	AAEL023500	Down	-0.478839	0.115029	0.000632513
ISC/EB-1	LOC5578801	AAEL003646	Down	-0.478923	0.123388	0.00104486
ISC/EB-1	LOC5578801	AAEL003646	Down	-0.478923	0.123388	0.00104486
ISC/EB-1	LOC110675612	AAEL022334	Down	-0.480376	0.064415	0.000114087
ISC/EB-1	LOC110675612	AAEL022334	Down	-0.480376	0.064415	0.000114087
ISC/EB-1	LOC5570080	AAEL001336	Down	-0.480442	0.105285	0.000571208
ISC/EB-1	LOC5570080	AAEL001336	Down	-0.480442	0.105285	0.000571208
ISC/EB-1	LOC5571461	AAEL009092	Down	-0.481789	0.0868009	0.000201783
ISC/EB-1	LOC5571461	AAEL009092	Down	-0.481789	0.0868009	0.000201783
ISC/EB-1	LOC5564477	AAEL014484	Down	-0.484036	0.0875648	0.00012052
ISC/EB-1	LOC5564477	AAEL014484	Down	-0.484036	0.0875648	0.00012052
ISC/EB-1	LOC5570147	AAEL008128	Down	-0.484548	0.128448	0.0013424
ISC/EB-1	LOC5570147	AAEL008128	Down	-0.484548	0.128448	0.0013424
ISC/EB-1	LOC5569598	AAEL021578	Down	-0.486158	0.116038	0.000636809
ISC/EB-1	LOC5569598	AAEL021578	Down	-0.486158	0.116038	0.000636809
ISC/EB-1	LOC5565836	AAEL005017	Down	-0.486265	0.107884	0.000410517
ISC/EB-1	LOC5565836	AAEL005017	Down	-0.486265	0.107884	0.000410517
ISC/EB-1	LOC5576642	AAEL012671	Down	-0.486735	0.0689354	0.000103268
ISC/EB-1	LOC5576642	AAEL012671	Down	-0.486735	0.0689354	0.000103268
ISC/EB-1	LOC5569078	AAEL001206	Down	-0.486983	0.134248	0.00148973
ISC/EB-1	LOC5569078	AAEL001206	Down	-0.486983	0.134248	0.00148973
ISC/EB-1	LOC5568054	AAEL006480	Down	-0.48883	0.13001	0.00122717
ISC/EB-1	LOC5568054	AAEL006480	Down	-0.48883	0.13001	0.00122717
ISC/EB-1	LOC5576414	AAEL012511	Down	-0.494182	0.121985	0.000803887
ISC/EB-1	LOC5576414	AAEL012511	Down	-0.494182	0.121985	0.000803887
ISC/EB-1	LOC5573065	AAEL014511	Down	-0.494455	0.0933126	0.000296412
ISC/EB-1	LOC5573065	AAEL014511	Down	-0.494455	0.0933126	0.000296412
ISC/EB-1	LOC5570916	AAEL001501	Down	-0.495289	0.136895	0.00139551
ISC/EB-1	LOC5570916	AAEL001501	Down	-0.495289	0.136895	0.00139551
ISC/EB-1	LOC5567383	AAEL006061	Down	-0.500285	0.137786	0.00187017
ISC/EB-1	LOC5567383	AAEL006061	Down	-0.500285	0.137786	0.00187017
ISC/EB-1	LOC5573418	AAEL002083	Down	-0.500421	0.0435864	0.000311495
ISC/EB-1	LOC5573418	AAEL002083	Down	-0.500421	0.0435864	0.000311495
ISC/EB-1	LOC5571262	AAEL001569	Down	-0.501226	0.107204	0.000140923
ISC/EB-1	LOC5571262	AAEL001569	Down	-0.501226	0.107204	0.000140923
ISC/EB-1	LOC5570780	AAEL008543	Down	-0.501928	0.0930313	5.55371e-05
ISC/EB-1	LOC5570780	AAEL008543	Down	-0.501928	0.0930313	5.55e-05
ISC/EB-1	LOC5567559	AAEL006158	Down	-0.502801	0.0534295	2.25223e-06
ISC/EB-1	LOC5567559	AAEL006158	Down	-0.502801	0.0534295	2.25e-06
ISC/EB-1	LOC5568504	AAEL006921	Down	-0.505149	0.0908278	7.65e-05
ISC/EB-1	LOC5568504	AAEL006921	Down	-0.505149	0.0908278	7.65434e-05
ISC/EB-1	LOC5573238	AAEL010330	Down	-0.507493	0.137881	0.00137386
ISC/EB-1	LOC5573238	AAEL010330	Down	-0.507493	0.137881	0.00137386
ISC/EB-1	LOC5568633	AAEL007023	Down	-0.508901	0.0950105	0.000112679
ISC/EB-1	LOC5568633	AAEL007023	Down	-0.508901	0.0950105	0.000112679
ISC/EB-1	LOC5568166	AAEL006609	Down	-0.509291	0.11751	0.00035207
ISC/EB-1	LOC5568166	AAEL006609	Down	-0.509291	0.11751	0.00035207
ISC/EB-1	LOC5569427	AAEL007624	Down	-0.510227	0.116395	0.000606073
ISC/EB-1	LOC5569427	AAEL007624	Down	-0.510227	0.116395	0.000606073
ISC/EB-1	LOC5575831	AAEL012099	Down	-0.510331	0.0691401	8.7224e-05
ISC/EB-1	LOC5575831	AAEL012099	Down	-0.510331	0.0691401	8.72e-05
ISC/EB-1	LOC5568659	AAEL007019	Down	-0.512961	0.08119	0.000127713
ISC/EB-1	LOC5568659	AAEL007019	Down	-0.512961	0.08119	0.000127713
ISC/EB-1	LOC23687867	AAEL017447	Down	-0.514011	0.0973869	8.42132e-05
ISC/EB-1	LOC23687867	AAEL017447	Down	-0.514011	0.0973869	8.42e-05
ISC/EB-1	LOC5572983	AAEL001919	Down	-0.517073	0.122291	0.00102578
ISC/EB-1	LOC5572983	AAEL001919	Down	-0.517073	0.122291	0.00102578
ISC/EB-1	LOC23687815	AAEL017395	Down	-0.518199	0.105577	0.000231282
ISC/EB-1	LOC23687815	AAEL017395	Down	-0.518199	0.105577	0.000231282
ISC/EB-1	LOC5573015	AAEL001916	Down	-0.521393	0.120255	0.000152233
ISC/EB-1	LOC5573015	AAEL001916	Down	-0.521393	0.120255	0.000152233
ISC/EB-1	LOC5578101	AAEL003418	Down	-0.524886	0.113695	7.78e-05
ISC/EB-1	LOC5578101	AAEL003418	Down	-0.524886	0.113695	7.78212e-05
ISC/EB-1	LOC5571571	AAEL009160	Down	-0.525375	0.0683721	5.99247e-05
ISC/EB-1	LOC5571571	AAEL009160	Down	-0.525375	0.0683721	5.99e-05
ISC/EB-1	LOC5579187	AAEL003873	Down	-0.526858	0.1292	0.000852951
ISC/EB-1	LOC5579187	AAEL003873	Down	-0.526858	0.1292	0.000852951
ISC/EB-1	LOC5578382	AAEL013661	Down	-0.527143	0.0400368	7.81217e-06
ISC/EB-1	LOC5578382	AAEL013661	Down	-0.527143	0.0400368	7.81e-06
ISC/EB-1	LOC5569049	AAEL007342	Down	-0.531959	0.0607389	3.24394e-05
ISC/EB-1	LOC5569049	AAEL007342	Down	-0.531959	0.0607389	3.24e-05
ISC/EB-1	LOC5568938	AAEL007246	Down	-0.533093	0.120001	0.000587324
ISC/EB-1	LOC5568938	AAEL007246	Down	-0.533093	0.120001	0.000587324
ISC/EB-1	LOC5578266	AAEL003505	Down	-0.533318	0.038594	1.74e-05
ISC/EB-1	LOC5578266	AAEL003505	Down	-0.533318	0.038594	1.74141e-05
ISC/EB-1	LOC5579102	AAEL003824	Down	-0.534398	0.115546	0.00052718
ISC/EB-1	LOC5579102	AAEL003824	Down	-0.534398	0.115546	0.00052718
ISC/EB-1	LOC5580073	AAEL002158	Down	-0.535819	0.120636	0.000366266
ISC/EB-1	LOC5580073	AAEL002158	Down	-0.535819	0.120636	0.000366266
ISC/EB-1	LOC5569787	AAEL023098	Down	-0.536706	0.102152	0.00020265
ISC/EB-1	LOC5569787	AAEL023098	Down	-0.536706	0.102152	0.00020265
ISC/EB-1	LOC5576069	AAEL026118	Down	-0.536911	0.13311	0.000811063
ISC/EB-1	LOC5576069	AAEL026118	Down	-0.536911	0.13311	0.000811063
ISC/EB-1	LOC5568764	AAEL010704	Down	-0.538434	0.110806	7.75e-05
ISC/EB-1	LOC5568764	AAEL010704	Down	-0.538434	0.110806	7.74596e-05
ISC/EB-1	LOC5577649	AAEL003267	Down	-0.541969	0.130892	0.000366881
ISC/EB-1	LOC5577649	AAEL003267	Down	-0.541969	0.130892	0.000366881
ISC/EB-1	LOC5572857	AAEL010070	Down	-0.542487	0.111779	0.000359369
ISC/EB-1	LOC5572857	AAEL010070	Down	-0.542487	0.111779	0.000359369
ISC/EB-1	LOC5576472	AAEL002886	Down	-0.54274	0.0615022	4.19e-05
ISC/EB-1	LOC5576472	AAEL002886	Down	-0.54274	0.0615022	4.18809e-05
ISC/EB-1	LOC5565647	AAEL004913	Down	-0.544489	0.149569	0.00102721
ISC/EB-1	LOC5565647	AAEL004913	Down	-0.544489	0.149569	0.00102721
ISC/EB-1	LOC5574494	AAEL002377	Down	-0.546141	0.148051	0.00131027
ISC/EB-1	LOC5574494	AAEL002377	Down	-0.546141	0.148051	0.00131027
ISC/EB-1	LOC5571226	AAEL008921	Down	-0.546909	0.0527474	2.39568e-05
ISC/EB-1	LOC5571226	AAEL008921	Down	-0.546909	0.0527474	2.4e-05
ISC/EB-1	LOC5567410	AAEL006069	Down	-0.546972	0.147951	0.0017709
ISC/EB-1	LOC5567410	AAEL006069	Down	-0.546972	0.147951	0.0017709
ISC/EB-1	LOC5571664	AAEL024228	Down	-0.54806	0.130452	0.000223045
ISC/EB-1	LOC5571664	AAEL024228	Down	-0.54806	0.130452	0.000223045
ISC/EB-1	LOC5567124	AAEL023543	Down	-0.552662	0.124942	0.000493541
ISC/EB-1	LOC5567124	AAEL023543	Down	-0.552662	0.124942	0.000493541
ISC/EB-1	LOC5568195	AAEL006619	Down	-0.552879	0.160303	0.00237753
ISC/EB-1	LOC5568195	AAEL006619	Down	-0.552879	0.160303	0.00237754
ISC/EB-1	LOC5574667	AAEL011302	Down	-0.554896	0.0499771	9.22676e-07
ISC/EB-1	LOC5574667	AAEL011302	Down	-0.554896	0.0499771	9.23e-07
ISC/EB-1	LOC5565253	AAEL004688	Down	-0.555093	0.133608	0.000429237
ISC/EB-1	LOC5565253	AAEL004688	Down	-0.555093	0.133608	0.000429237
ISC/EB-1	LOC5566687	AAEL005558	Down	-0.558521	0.060385	4.84e-05
ISC/EB-1	LOC5566687	AAEL005558	Down	-0.558521	0.060385	4.84017e-05
ISC/EB-1	LOC5570501	AAEL001394	Down	-0.561074	0.147658	0.00146662
ISC/EB-1	LOC5570501	AAEL001394	Down	-0.561074	0.147658	0.00146662
ISC/EB-1	LOC5572840	AAEL010063	Down	-0.561599	0.0934685	6.03597e-05
ISC/EB-1	LOC5572840	AAEL010063	Down	-0.561599	0.0934685	6.04e-05
ISC/EB-1	LOC5577480	AAEL024613	Down	-0.563049	0.0748399	2.3e-05
ISC/EB-1	LOC5577480	AAEL024613	Down	-0.563049	0.0748399	2.29774e-05
ISC/EB-1	LOC110675609	AAEL021795	Down	-0.563056	0.0386684	8.07651e-06
ISC/EB-1	LOC110675609	AAEL021795	Down	-0.563056	0.0386684	8.08e-06
ISC/EB-1	LOC5573894	AAEL002184	Down	-0.56427	0.146596	0.000769604
ISC/EB-1	LOC5573894	AAEL002184	Down	-0.56427	0.146596	0.000769604
ISC/EB-1	LOC5579183	AAEL003901	Down	-0.568247	0.119443	0.000218592
ISC/EB-1	LOC5579183	AAEL003901	Down	-0.568247	0.119443	0.000218592
ISC/EB-1	LOC5572255	AAEL009681	Down	-0.568415	0.111936	0.00038242
ISC/EB-1	LOC5572255	AAEL009681	Down	-0.568415	0.111936	0.00038242
ISC/EB-1	LOC5580058	AAEL002155	Down	-0.569414	0.153542	0.00183958
ISC/EB-1	LOC5580058	AAEL002155	Down	-0.569414	0.153542	0.00183958
ISC/EB-1	LOC5570960	AAEL008692	Down	-0.571598	0.123824	0.000205833
ISC/EB-1	LOC5570960	AAEL008692	Down	-0.571598	0.123824	0.000205833
ISC/EB-1	LOC5577510	AAEL003180	Down	-0.579032	0.147979	0.00101744
ISC/EB-1	LOC5577510	AAEL003180	Down	-0.579032	0.147979	0.00101743
ISC/EB-1	LOC5576078	AAEL012310	Down	-0.579265	0.126209	0.000457232
ISC/EB-1	LOC5576078	AAEL012310	Down	-0.579265	0.126209	0.000457232
ISC/EB-1	LOC5577227	AAEL003130	Down	-0.582743	0.0938686	0.000162407
ISC/EB-1	LOC5577227	AAEL003130	Down	-0.582743	0.0938686	0.000162407
ISC/EB-1	LOC23687965	AAEL017545	Down	-0.584211	0.147509	0.000792309
ISC/EB-1	LOC23687965	AAEL017545	Down	-0.584211	0.147509	0.000792309
ISC/EB-1	LOC5580057	AAEL002170	Down	-0.584255	0.146229	0.000632665
ISC/EB-1	LOC5580057	AAEL002170	Down	-0.584255	0.146229	0.000632665
ISC/EB-1	LOC5575137	AAEL000378	Down	-0.590435	0.138982	0.000271876
ISC/EB-1	LOC5575137	AAEL000378	Down	-0.590435	0.138982	0.000271876
ISC/EB-1	LOC5566470	AAEL005408	Down	-0.591858	0.125222	0.000642213
ISC/EB-1	LOC5566470	AAEL005408	Down	-0.591858	0.125222	0.000642213
ISC/EB-1	LOC5565217	AAEL004669	Down	-0.598218	0.11795	0.000428346
ISC/EB-1	LOC5565217	AAEL004669	Down	-0.598218	0.11795	0.000428346
ISC/EB-1	LOC5574609	AAEL008686	Down	-0.599254	0.129089	0.000286286
ISC/EB-1	LOC5574609	AAEL008686	Down	-0.599254	0.129089	0.000286286
ISC/EB-1	LOC5570396	AAEL008291	Down	-0.60097	0.15735	0.00091725
ISC/EB-1	LOC5570396	AAEL008291	Down	-0.60097	0.15735	0.00091725
ISC/EB-1	LOC110679374	AAEL026843	Down	-0.602352	0.0736427	5.67683e-05
ISC/EB-1	LOC110679374	AAEL026843	Down	-0.602352	0.0736427	5.68e-05
ISC/EB-1	LOC5578839	AAEL019482	Down	-0.602379	0.100733	7.83e-06
ISC/EB-1	LOC5578839	AAEL019482	Down	-0.602379	0.100733	7.83121e-06
ISC/EB-1	LOC5572156	AAEL009561	Down	-0.60356	0.106409	0.000131069
ISC/EB-1	LOC5572156	AAEL009561	Down	-0.60356	0.106409	0.000131069
ISC/EB-1	LOC5572008	AAEL009483	Down	-0.610535	0.109954	0.000143932
ISC/EB-1	LOC5572008	AAEL009483	Down	-0.610535	0.109954	0.000143932
ISC/EB-1	LOC5576270	AAEL012421	Down	-0.61116	0.104865	9.72e-05
ISC/EB-1	LOC5576270	AAEL012421	Down	-0.61116	0.104865	9.72383e-05
ISC/EB-1	LOC5569822	AAEL001312	Down	-0.611559	0.145156	0.000536937
ISC/EB-1	LOC5569822	AAEL001312	Down	-0.611559	0.145156	0.000536937
ISC/EB-1	LOC5563589	AAEL000090	Down	-0.61342	0.115803	0.00014681
ISC/EB-1	LOC5563589	AAEL000090	Down	-0.61342	0.115803	0.00014681
ISC/EB-1	LOC5566877	AAEL000811	Down	-0.614533	0.142049	0.000366071
ISC/EB-1	LOC5566877	AAEL000811	Down	-0.614533	0.142049	0.000366071
ISC/EB-1	LOC5565460	AAEL026741	Down	-0.61813	0.0985778	0.000132145
ISC/EB-1	LOC5565460	AAEL026741	Down	-0.61813	0.0985778	0.000132145
ISC/EB-1	LOC5569183	AAEL007439	Down	-0.621373	0.0602482	9.23e-07
ISC/EB-1	LOC5569183	AAEL007439	Down	-0.621373	0.0602482	9.22841e-07
ISC/EB-1	LOC5567037	AAEL005790	Down	-0.627443	0.130206	0.000244971
ISC/EB-1	LOC5567037	AAEL005790	Down	-0.627443	0.130206	0.000244971
ISC/EB-1	LOC23687735	AAEL017315	Down	-0.629005	0.0830952	5.85e-05
ISC/EB-1	LOC23687735	AAEL017315	Down	-0.629005	0.0830952	5.85304e-05
ISC/EB-1	LOC5577537	AAEL013252	Down	-0.629041	0.14718	0.000387323
ISC/EB-1	LOC5577537	AAEL013252	Down	-0.629041	0.14718	0.000387323
ISC/EB-1	LOC5566143	AAEL005213	Down	-0.629097	0.0665619	7.1546e-05
ISC/EB-1	LOC5566143	AAEL005213	Down	-0.629097	0.0665619	7.15e-05
ISC/EB-1	LOC5568477	AAEL006883	Down	-0.635382	0.142802	0.000184289
ISC/EB-1	LOC5568477	AAEL006883	Down	-0.635382	0.142802	0.000184289
ISC/EB-1	LOC5571828	AAEL001690	Down	-0.638606	0.0943176	0.000105553
ISC/EB-1	LOC5571828	AAEL001690	Down	-0.638606	0.0943176	0.000105553
ISC/EB-1	LOC5579964	AAEL007595	Down	-0.642078	0.119766	0.000211294
ISC/EB-1	LOC5579964	AAEL007595	Down	-0.642078	0.119766	0.000211294
ISC/EB-1	LOC5580194	AAEL002539	Down	-0.644245	0.111407	0.000140598
ISC/EB-1	LOC5580194	AAEL002539	Down	-0.644245	0.111407	0.000140598
ISC/EB-1	LOC5566370	AAEL005354	Down	-0.646625	0.141448	0.000293564
ISC/EB-1	LOC5566370	AAEL005354	Down	-0.646625	0.141448	0.000293564
ISC/EB-1	LOC5571047	AAEL008768	Down	-0.646732	0.0941726	5.66699e-06
ISC/EB-1	LOC5571047	AAEL008768	Down	-0.646732	0.0941726	5.67e-06
ISC/EB-1	LOC5569950	AAEL008039	Down	-0.653806	0.053821	4.48e-06
ISC/EB-1	LOC5569950	AAEL008039	Down	-0.653806	0.053821	4.48164e-06
ISC/EB-1	LOC5570050	AAEL000185	Down	-0.654331	0.0760143	5.37e-05
ISC/EB-1	LOC5570050	AAEL000185	Down	-0.654331	0.0760143	5.37172e-05
ISC/EB-1	LOC5574180	AAEL002304	Down	-0.654653	0.123587	0.000355264
ISC/EB-1	LOC5574180	AAEL002304	Down	-0.654653	0.123587	0.000355264
ISC/EB-1	LOC5567495	AAEL000934	Down	-0.65587	0.11475	0.000132642
ISC/EB-1	LOC5567495	AAEL000934	Down	-0.65587	0.11475	0.000132642
ISC/EB-1	LOC5568408	AAEL006829	Down	-0.656574	0.104607	0.000367537
ISC/EB-1	LOC5568408	AAEL006829	Down	-0.656574	0.104607	0.000367537
ISC/EB-1	LOC5572561	AAEL009894	Down	-0.660237	0.125981	7e-05
ISC/EB-1	LOC5572561	AAEL009894	Down	-0.660237	0.125981	7.00236e-05
ISC/EB-1	LOC5575995	AAEL002761	Down	-0.663318	0.0903491	9.03208e-05
ISC/EB-1	LOC5575995	AAEL002761	Down	-0.663318	0.0903491	9.03e-05
ISC/EB-1	LOC5570324	AAEL001385	Down	-0.665826	0.128773	0.000252989
ISC/EB-1	LOC5570324	AAEL001385	Down	-0.665826	0.128773	0.000252989
ISC/EB-1	LOC5578090	AAEL003415	Down	-0.668579	0.0991694	0.000105371
ISC/EB-1	LOC5578090	AAEL003415	Down	-0.668579	0.0991694	0.000105371
ISC/EB-1	LOC5574929	AAEL011527	Down	-0.669052	0.0960047	2.66512e-05
ISC/EB-1	LOC5574929	AAEL011527	Down	-0.669052	0.0960047	2.67e-05
ISC/EB-1	LOC5574542	AAEL011216	Down	-0.673762	0.127522	0.000258599
ISC/EB-1	LOC5574542	AAEL011216	Down	-0.673762	0.127522	0.000258599
ISC/EB-1	LOC5573312	AAEL010416	Down	-0.677102	0.117438	0.000108505
ISC/EB-1	LOC5573312	AAEL010416	Down	-0.677102	0.117438	0.000108505
ISC/EB-1	LOC5567091	AAEL012313	Down	-0.681237	0.0985864	3.35e-05
ISC/EB-1	LOC5567091	AAEL012313	Down	-0.681237	0.0985864	3.34739e-05
ISC/EB-1	LOC5580331	AAEL013074	Down	-0.681673	0.0983255	9.12932e-06
ISC/EB-1	LOC5580331	AAEL013074	Down	-0.681673	0.0983255	9.13e-06
ISC/EB-1	LOC5569575	AAEL007765	Down	-0.682168	0.0622252	1.30981e-05
ISC/EB-1	LOC5569575	AAEL007765	Down	-0.682168	0.0622252	1.31e-05
ISC/EB-1	LOC5579505	AAEL015136	Down	-0.683309	0.125503	0.000287648
ISC/EB-1	LOC5579505	AAEL015136	Down	-0.683309	0.125503	0.000287648
ISC/EB-1	LOC5565060	AAEL025769	Down	-0.684459	0.0981382	1.94737e-05
ISC/EB-1	LOC5565060	AAEL025769	Down	-0.684459	0.0981382	1.95e-05
ISC/EB-1	LOC5573994	AAEL010843	Down	-0.685654	0.0463241	6.18e-06
ISC/EB-1	LOC5573994	AAEL010843	Down	-0.685654	0.0463241	6.17693e-06
ISC/EB-1	LOC5572627	AAEL009946	Down	-0.687711	0.140979	0.000506257
ISC/EB-1	LOC5572627	AAEL009946	Down	-0.687711	0.140979	0.000506257
ISC/EB-1	LOC5579227	AAEL014064	Down	-0.688032	0.0689807	1.07988e-05
ISC/EB-1	LOC5579227	AAEL014064	Down	-0.688032	0.0689807	1.08e-05
ISC/EB-1	LOC5576934	AAEL012875	Down	-0.690967	0.145448	0.000148195
ISC/EB-1	LOC5576934	AAEL012875	Down	-0.690967	0.145448	0.000148195
ISC/EB-1	LOC5579172	AAEL003888	Down	-0.692003	0.0841616	6.4e-05
ISC/EB-1	LOC5579172	AAEL003888	Down	-0.692003	0.0841616	6.40114e-05
ISC/EB-1	LOC5568292	AAEL006721	Down	-0.692398	0.0936167	7.93e-05
ISC/EB-1	LOC5568292	AAEL006721	Down	-0.692398	0.0936167	7.93373e-05
ISC/EB-1	LOC5565652	AAEL004902	Down	-0.694287	0.127922	0.000170041
ISC/EB-1	LOC5565652	AAEL004902	Down	-0.694287	0.127922	0.000170041
ISC/EB-1	LOC5577178	AAEL013047	Down	-0.696606	0.115529	0.000197853
ISC/EB-1	LOC5577178	AAEL013047	Down	-0.696606	0.115529	0.000197853
ISC/EB-1	LOC5574634	AAEL020739	Down	-0.697482	0.0883811	5.12e-05
ISC/EB-1	LOC5574634	AAEL020739	Down	-0.697482	0.0883811	5.1216e-05
ISC/EB-1	LOC5578389	AAEL013679	Down	-0.69989	0.127115	0.000381088
ISC/EB-1	LOC5578389	AAEL013679	Down	-0.69989	0.127115	0.000381088
ISC/EB-1	LOC5564821	AAEL000626	Down	-0.704641	0.0959994	0.000212298
ISC/EB-1	LOC5564821	AAEL000626	Down	-0.704641	0.0959994	0.000212298
ISC/EB-1	LOC23687404	AAEL016984	Down	-0.718558	0.0470748	1.47752e-05
ISC/EB-1	LOC23687404	AAEL016984	Down	-0.718558	0.0470748	1.48e-05
ISC/EB-1	LOC5572347	AAEL009733	Down	-0.722338	0.0886636	1.27015e-05
ISC/EB-1	LOC5572347	AAEL009733	Down	-0.722338	0.0886636	1.27e-05
ISC/EB-1	LOC5573433	AAEL010486	Down	-0.729733	0.127791	5.81e-05
ISC/EB-1	LOC5573433	AAEL010486	Down	-0.729733	0.127791	5.8072e-05
ISC/EB-1	LOC5573583	AAEL002130	Down	-0.729905	0.0645299	1.99162e-05
ISC/EB-1	LOC5573583	AAEL002130	Down	-0.729905	0.0645299	1.99e-05
ISC/EB-1	LOC5578596	AAEL013778	Down	-0.735954	0.122247	0.000256307
ISC/EB-1	LOC5578596	AAEL013778	Down	-0.735954	0.122247	0.000256307
ISC/EB-1	LOC5568503	AAEL006922	Down	-0.736319	0.0904008	0.000106358
ISC/EB-1	LOC5568503	AAEL006922	Down	-0.736319	0.0904008	0.000106358
ISC/EB-1	LOC5574197	AAEL002296	Down	-0.744877	0.138336	0.000157567
ISC/EB-1	LOC5574197	AAEL002296	Down	-0.744877	0.138336	0.000157567
ISC/EB-1	LOC110678949	AAEL022104	Down	-0.74989	0.081807	1.12e-05
ISC/EB-1	LOC110678949	AAEL022104	Down	-0.74989	0.081807	1.11756e-05
ISC/EB-1	LOC5575813	AAEL012069	Down	-0.752269	0.0899429	2.10851e-05
ISC/EB-1	LOC5575813	AAEL012069	Down	-0.752269	0.0899429	2.11e-05
ISC/EB-1	LOC5572224	AAEL009658	Down	-0.753533	0.1419	0.000130883
ISC/EB-1	LOC5572224	AAEL009658	Down	-0.753533	0.1419	0.000130883
ISC/EB-1	LOC5580214	AAEL011918	Down	-0.756282	0.121468	0.000165008
ISC/EB-1	LOC5580214	AAEL011918	Down	-0.756282	0.121468	0.000165008
ISC/EB-1	LOC5567961	AAEL006420	Down	-0.762506	0.141261	9.42e-05
ISC/EB-1	LOC5567961	AAEL006420	Down	-0.762506	0.141261	9.42446e-05
ISC/EB-1	LOC5576246	AAEL002853	Down	-0.763759	0.122599	0.000121402
ISC/EB-1	LOC5576246	AAEL002853	Down	-0.763759	0.122599	0.000121402
ISC/EB-1	LOC5569005	AAEL007282	Down	-0.76888	0.132968	0.000313685
ISC/EB-1	LOC5569005	AAEL007282	Down	-0.76888	0.132968	0.000313685
ISC/EB-1	LOC5576054	AAEL013952	Down	-0.770617	0.12556	6.24e-05
ISC/EB-1	LOC5576054	AAEL013952	Down	-0.770617	0.12556	6.23709e-05
ISC/EB-1	LOC5575032	AAEL011584	Down	-0.77645	0.152339	6.80915e-05
ISC/EB-1	LOC5575032	AAEL011584	Down	-0.77645	0.152339	6.81e-05
ISC/EB-1	LOC23687505	AAEL017085	Down	-0.777045	0.131741	0.000114418
ISC/EB-1	LOC23687505	AAEL017085	Down	-0.777045	0.131741	0.000114418
ISC/EB-1	LOC5565670	AAEL014931	Down	-0.778822	0.12855	0.000247598
ISC/EB-1	LOC5565670	AAEL014931	Down	-0.778822	0.12855	0.000247598
ISC/EB-1	LOC5578506	AAEL023729	Down	-0.785637	0.0914594	4.49627e-05
ISC/EB-1	LOC5578506	AAEL023729	Down	-0.785637	0.0914594	4.5e-05
ISC/EB-1	LOC5565409	AAEL014847	Down	-0.787976	0.108325	2.21747e-05
ISC/EB-1	LOC5565409	AAEL014847	Down	-0.787976	0.108325	2.22e-05
ISC/EB-1	LOC5575990	AAEL002757	Down	-0.794312	0.15453	0.000224982
ISC/EB-1	LOC5575990	AAEL002757	Down	-0.794312	0.15453	0.000224982
ISC/EB-1	LOC5569443	AAEL001232	Down	-0.798807	0.121063	5.581e-05
ISC/EB-1	LOC5569443	AAEL001232	Down	-0.798807	0.121063	5.58e-05
ISC/EB-1	LOC5566301	AAEL005293	Down	-0.799009	0.094402	2.1805e-05
ISC/EB-1	LOC5566301	AAEL005293	Down	-0.799009	0.094402	2.18e-05
ISC/EB-1	LOC5579851	AAEL005861	Down	-0.80458	0.142159	0.00013699
ISC/EB-1	LOC5579851	AAEL005861	Down	-0.80458	0.142159	0.00013699
ISC/EB-1	LOC5564278	AAEL014379	Down	-0.806108	0.119935	0.000166641
ISC/EB-1	LOC5564278	AAEL014379	Down	-0.806108	0.119935	0.000166641
ISC/EB-1	LOC5571506	AAEL019988	Down	-0.811867	0.111092	5.51e-05
ISC/EB-1	LOC5571506	AAEL019988	Down	-0.811867	0.111092	5.51027e-05
ISC/EB-1	LOC5580019	AAEL009645	Down	-0.815799	0.0479399	1.52e-05
ISC/EB-1	LOC5580019	AAEL009645	Down	-0.815799	0.0479399	1.518e-05
ISC/EB-1	LOC5579951	AAEL006786	Down	-0.822325	0.0837181	3e-05
ISC/EB-1	LOC5579951	AAEL006786	Down	-0.822325	0.0837181	2.99768e-05
ISC/EB-1	LOC5564769	AAEL004438	Down	-0.830128	0.133587	0.000240301
ISC/EB-1	LOC5564769	AAEL004438	Down	-0.830128	0.133587	0.000240301
ISC/EB-1	LOC5574376	AAEL018211	Down	-0.836966	0.0816169	2.00878e-07
ISC/EB-1	LOC5574376	AAEL018211	Down	-0.836966	0.0816169	2.01e-07
ISC/EB-1	LOC5564072	AAEL004067	Down	-0.837261	0.102158	0.000113142
ISC/EB-1	LOC5564072	AAEL004067	Down	-0.837261	0.102158	0.000113142
ISC/EB-1	LOC5575274	AAEL011746	Down	-0.843355	0.109437	7.26325e-05
ISC/EB-1	LOC5575274	AAEL011746	Down	-0.843355	0.109437	7.26e-05
ISC/EB-1	LOC5573215	AAEL019561	Down	-0.846297	0.138724	0.000178574
ISC/EB-1	LOC5573215	AAEL019561	Down	-0.846297	0.138724	0.000178574
ISC/EB-1	LOC5574220	AAEL010991	Down	-0.847293	0.13798	0.000115374
ISC/EB-1	LOC5574220	AAEL010991	Down	-0.847293	0.13798	0.000115374
ISC/EB-1	LOC5569782	AAEL007920	Down	-0.850565	0.123039	3.08e-05
ISC/EB-1	LOC5569782	AAEL007920	Down	-0.850565	0.123039	3.07893e-05
ISC/EB-1	LOC5569050	AAEL007349	Down	-0.866124	0.0606548	2.7e-06
ISC/EB-1	LOC5569050	AAEL007349	Down	-0.866124	0.0606548	2.69839e-06
ISC/EB-1	LOC5573851	AAEL010777	Down	-0.882146	0.0523626	2.77017e-06
ISC/EB-1	LOC5573851	AAEL010777	Down	-0.882146	0.0523626	2.77e-06
ISC/EB-1	LOC5569026	AAEL007322	Down	-0.882706	0.118305	5.99e-05
ISC/EB-1	LOC5569026	AAEL007322	Down	-0.882706	0.118305	5.98722e-05
ISC/EB-1	LOC5570932	AAEL008671	Down	-0.891426	0.113343	6.81e-05
ISC/EB-1	LOC5570932	AAEL008671	Down	-0.891426	0.113343	6.80759e-05
ISC/EB-1	LOC5577316	AAEL013163	Down	-0.891979	0.0784828	2.18e-07
ISC/EB-1	LOC5577316	AAEL013163	Down	-0.891979	0.0784828	2.18173e-07
ISC/EB-1	LOC5571997	AAEL009487	Down	-0.892534	0.110244	1.51838e-05
ISC/EB-1	LOC5571997	AAEL009487	Down	-0.892534	0.110244	1.52e-05
ISC/EB-1	CFI06_mgr01	-	Down	-0.897842	0.0615911	5.22558e-06
ISC/EB-1	CFI06_mgr01	-	Down	-0.897842	0.0615911	5.23e-06
ISC/EB-1	LOC5568586	AAEL001101	Down	-0.906338	0.118406	2.55e-05
ISC/EB-1	LOC5568586	AAEL001101	Down	-0.906338	0.118406	2.54874e-05
ISC/EB-1	LOC5579926	AAEL006795	Down	-0.909539	0.120492	5.82e-05
ISC/EB-1	LOC5579926	AAEL006795	Down	-0.909539	0.120492	5.82051e-05
ISC/EB-1	LOC5565148	AAEL004620	Down	-0.911008	0.115696	8.42e-06
ISC/EB-1	LOC5565148	AAEL004620	Down	-0.911008	0.115696	8.42465e-06
ISC/EB-1	LOC5579901	AAEL001052	Down	-0.914174	0.105092	7.33e-05
ISC/EB-1	LOC5579901	AAEL001052	Down	-0.914174	0.105092	7.32894e-05
ISC/EB-1	LOC5570996	AAEL008723	Down	-0.942853	0.0942774	1.86832e-06
ISC/EB-1	LOC5570996	AAEL008723	Down	-0.942853	0.0942774	1.87e-06
ISC/EB-1	LOC5580280	AAEL003006	Down	-0.948271	0.10354	2.3048e-05
ISC/EB-1	LOC5580280	AAEL003006	Down	-0.948271	0.10354	2.3e-05
ISC/EB-1	LOC5570505	AAEL001411	Down	-0.951526	0.0790738	1.05e-06
ISC/EB-1	LOC5570505	AAEL001411	Down	-0.951526	0.0790738	1.04642e-06
ISC/EB-1	LOC5565303	AAEL004710	Down	-0.964096	0.144392	6.92107e-05
ISC/EB-1	LOC5565303	AAEL004710	Down	-0.964096	0.144392	6.92e-05
ISC/EB-1	LOC5571854	AAEL009345	Down	-0.96644	0.111503	8.6e-06
ISC/EB-1	LOC5571854	AAEL009345	Down	-0.96644	0.111503	8.60375e-06
ISC/EB-1	LOC5571153	AAEL008849	Down	-0.966852	0.13534	0.000137517
ISC/EB-1	LOC5571153	AAEL008849	Down	-0.966852	0.13534	0.000137517
ISC/EB-1	LOC5568890	AAEL007197	Down	-0.968236	0.119904	5.79469e-05
ISC/EB-1	LOC5568890	AAEL007197	Down	-0.968236	0.119904	5.79e-05
ISC/EB-1	LOC5566468	AAEL005426	Down	-0.970109	0.127503	2.67e-05
ISC/EB-1	LOC5566468	AAEL005426	Down	-0.970109	0.127503	2.67158e-05
ISC/EB-1	LOC110674148		Down	-1.02032	0.0855714	1.44568e-05
ISC/EB-1	LOC110674148		Down	-1.02032	0.0855714	1.45e-05
ISC/EB-1	LOC5567769	AAEL000102	Down	-1.04092	0.0818296	9.86026e-06
ISC/EB-1	LOC5567769	AAEL000102	Down	-1.04092	0.0818296	9.86e-06
ISC/EB-1	LOC5565048	AAEL004567	Down	-1.05702	0.0821002	2.94e-06
ISC/EB-1	LOC5565048	AAEL004567	Down	-1.05702	0.0821002	2.93909e-06
ISC/EB-1	LOC5565307	AAEL004716	Down	-1.06203	0.128824	1.89965e-07
ISC/EB-1	LOC5565307	AAEL004716	Down	-1.06203	0.128824	1.9e-07
ISC/EB-1	LOC5565108	AAEL004586	Down	-1.07381	0.0948858	7.13029e-06
ISC/EB-1	LOC5565108	AAEL004586	Down	-1.07381	0.0948858	7.13e-06
ISC/EB-1	LOC5572285	AAEL001779	Down	-1.07845	0.106165	4.39e-06
ISC/EB-1	LOC5572285	AAEL001779	Down	-1.07845	0.106165	4.3896e-06
ISC/EB-1	LOC5567342	AAEL006006	Down	-1.08299	0.0927646	4.58848e-06
ISC/EB-1	LOC5567342	AAEL006006	Down	-1.08299	0.0927646	4.59e-06
ISC/EB-1	LOC5570924	AAEL026751	Down	-1.11484	0.113573	3.26768e-05
ISC/EB-1	LOC5570924	AAEL026751	Down	-1.11484	0.113573	3.27e-05
ISC/EB-1	LOC5564469	AAEL014452	Down	-1.12311	0.145908	3.51e-05
ISC/EB-1	LOC5564469	AAEL014452	Down	-1.12311	0.145908	3.50999e-05
ISC/EB-1	LOC5571053	AAEL008769	Down	-1.12373	0.119555	4.23e-05
ISC/EB-1	LOC5571053	AAEL008769	Down	-1.12373	0.119555	4.23227e-05
ISC/EB-1	LOC5566471	AAEL005407	Down	-1.15731	0.135366	3.04e-05
ISC/EB-1	LOC5566471	AAEL005407	Down	-1.15731	0.135366	3.04424e-05
ISC/EB-1	LOC5564161	AAEL004148	Down	-1.16466	0.105948	1.16e-05
ISC/EB-1	LOC5564161	AAEL004148	Down	-1.16466	0.105948	1.15641e-05
ISC/EB-1	LOC5574590	AAEL002416	Down	-1.1952	0.134723	3.12424e-05
ISC/EB-1	LOC5574590	AAEL002416	Down	-1.1952	0.134723	3.12e-05
ISC/EB-1	LOC5568476	AAEL006886	Down	-1.20946	0.136915	5.55948e-05
ISC/EB-1	LOC5568476	AAEL006886	Down	-1.20946	0.136915	5.56e-05
ISC/EB-1	LOC5568331	AAEL001094	Down	-1.21445	0.126074	2.21456e-05
ISC/EB-1	LOC5568331	AAEL001094	Down	-1.21445	0.126074	2.21e-05
ISC/EB-1	LOC5577023	AAEL012939	Down	-1.22396	0.0992394	7.83e-06
ISC/EB-1	LOC5577023	AAEL012939	Down	-1.22396	0.0992394	7.82714e-06
ISC/EB-1	LOC5564117	AAEL019408	Down	-1.24578	0.0804874	1.03261e-05
ISC/EB-1	LOC5564117	AAEL019408	Down	-1.24578	0.0804874	1.03e-05
ISC/EB-1	LOC5565770	AAEL004986	Down	-1.25653	0.128897	3.78847e-06
ISC/EB-1	LOC5565770	AAEL004986	Down	-1.25653	0.128897	3.79e-06
ISC/EB-1	LOC5568069		Down	-1.26569	0.116781	9.2e-06
ISC/EB-1	LOC5568069		Down	-1.26569	0.116781	9.19642e-06
ISC/EB-1	LOC5576348	AAEL002861	Down	-1.28415	0.0937788	5.50829e-06
ISC/EB-1	LOC5576348	AAEL002861	Down	-1.28415	0.0937788	5.51e-06
ISC/EB-1	LOC5573673	AAEL019604	Down	-1.29265	0.107197	1.5276e-05
ISC/EB-1	LOC5573673	AAEL019604	Down	-1.29265	0.107197	1.53e-05
ISC/EB-1	LOC5579924	AAEL006794	Down	-1.31606	0.123951	4.57246e-06
ISC/EB-1	LOC5579924	AAEL006794	Down	-1.31606	0.123951	4.57e-06
ISC/EB-1	LOC5571900	AAEL009377	Down	-1.3536	0.141871	5.04294e-06
ISC/EB-1	LOC5571900	AAEL009377	Down	-1.3536	0.141871	5.04e-06
ISC/EB-1	LOC5566467	AAEL005417	Down	-1.3918	0.121041	2.18998e-05
ISC/EB-1	LOC5566467	AAEL005417	Down	-1.3918	0.121041	2.19e-05
ISC/EB-1	LOC110674150		Down	-1.41287	0.103679	3.87889e-05
ISC/EB-1	LOC110674150		Down	-1.41287	0.103679	3.88e-05
ISC/EB-1	LOC5570648	AAEL008468	Down	-1.47434	0.133147	6.52e-06
ISC/EB-1	LOC5570648	AAEL008468	Down	-1.47434	0.133147	6.51784e-06
ISC/EB-1	LOC5576841	AAEL012827	Down	-1.57409	0.101345	1.04475e-06
ISC/EB-1	LOC5576841	AAEL012827	Down	-1.57409	0.101345	1.04e-06
ISC/EB-1	LOC5575706	AAEL012014	Down	-1.61917	0.115471	9.03001e-06
ISC/EB-1	LOC5575706	AAEL012014	Down	-1.61917	0.115471	9.03e-06
ISC/EB-1	LOC5564019	AAEL019487	Down	-1.70177	0.108838	1.29281e-05
ISC/EB-1	LOC5564019	AAEL019487	Down	-1.70177	0.108838	1.29e-05
ISC/EB-1	LOC110674151		Down	-1.73345	0.117952	1.23082e-05
ISC/EB-1	LOC110674151		Down	-1.73345	0.117952	1.23e-05
ISC/EB-1	LOC5564609	AAEL014531	Down	-1.82018	0.125021	9.67e-08
ISC/EB-1	LOC5564609	AAEL014531	Down	-1.82018	0.125021	9.67395e-08
ISC/EB-1	LOC110674152		Down	-1.87814	0.143966	2.42977e-05
ISC/EB-1	LOC110674152		Down	-1.87814	0.143966	2.43e-05
ISC/EB-1	LOC5577707		Down	-2.17904	0.0844248	1.68e-07
ISC/EB-1	LOC5577707		Down	-2.17904	0.0844248	1.68154e-07
ISC/EB-1	LOC5577712		Down	-2.81608	0.126309	1.22893e-06
ISC/EB-1	LOC5577712		Down	-2.81608	0.126309	1.23e-06
ISC/EB-1	LOC5573688		Down	-3.04644	0.154579	5.22e-06
ISC/EB-1	LOC5573688		Down	-3.04644	0.154579	5.22114e-06
ISC/EB-prol	LOC5570784	AAEL022646	Up	1.36948	0.0964062	6.68393e-06
ISC/EB-prol	LOC5570784	AAEL022646	Up	1.36948	0.0964062	6.68e-06
ISC/EB-prol	LOC5571275	AAEL001577	Up	1.18795	0.131711	6.11e-05
ISC/EB-prol	LOC5571275	AAEL001577	Up	1.18795	0.131711	6.11188e-05
ISC/EB-prol	LOC5567964	AAEL006425	Up	1.17638	0.0559267	4.97e-06
ISC/EB-prol	LOC5567964	AAEL006425	Up	1.17638	0.0559267	4.96613e-06
ISC/EB-prol	LOC5577433	AAEL019845	Up	1.14452	0.136866	2.4718e-05
ISC/EB-prol	LOC5577433	AAEL019845	Up	1.14452	0.136866	2.47e-05
ISC/EB-prol	LOC5574806	AAEL002467	Up	1.12441	0.10631	3.21e-05
ISC/EB-prol	LOC5574806	AAEL002467	Up	1.12441	0.10631	3.21173e-05
ISC/EB-prol	LOC5565454	AAEL000647	Up	0.926646	0.101678	1.39378e-05
ISC/EB-prol	LOC5565454	AAEL000647	Up	0.926646	0.101678	1.39e-05
ISC/EB-prol	LOC5564828	AAEL025975	Up	0.850624	0.152385	0.000130146
ISC/EB-prol	LOC5564828	AAEL025975	Up	0.850624	0.152385	0.000130146
ISC/EB-prol	LOC5576612	AAEL012636	Up	0.830766	0.148882	0.000205537
ISC/EB-prol	LOC5576612	AAEL012636	Up	0.830766	0.148882	0.000205537
ISC/EB-prol	LOC5565453	AAEL000667	Up	0.804416	0.141885	4.61e-05
ISC/EB-prol	LOC5565453	AAEL000667	Up	0.804416	0.141885	4.61452e-05
ISC/EB-prol	LOC110676705	AAEL022822	Up	0.795582	0.105255	0.000172051
ISC/EB-prol	LOC110676705	AAEL022822	Up	0.795582	0.105255	0.000172051
ISC/EB-prol	LOC5575535	AAEL011905	Up	0.762376	0.0848913	2.92e-05
ISC/EB-prol	LOC5575535	AAEL011905	Up	0.762376	0.0848913	2.92377e-05
ISC/EB-prol	LOC5569925	AAEL027654	Up	0.707338	0.102776	0.000122774
ISC/EB-prol	LOC5569925	AAEL027654	Up	0.707338	0.102776	0.000122774
ISC/EB-prol	LOC5573437	AAEL010479	Up	0.683981	0.126263	0.000153522
ISC/EB-prol	LOC5573437	AAEL010479	Up	0.683981	0.126263	0.000153522
ISC/EB-prol	LOC5568255	AAEL006704	Up	0.675793	0.232611	0.0032677
ISC/EB-prol	LOC5568255	AAEL006704	Up	0.675793	0.232611	0.0032677
ISC/EB-prol	LOC5565507	AAEL004809	Up	0.665414	0.148557	0.000119435
ISC/EB-prol	LOC5565507	AAEL004809	Up	0.665414	0.148557	0.000119435
ISC/EB-prol	LOC5566251	AAEL015110	Up	0.660912	0.138442	0.000455157
ISC/EB-prol	LOC5566251	AAEL015110	Up	0.660912	0.138442	0.000455157
ISC/EB-prol	LOC110678855	AAEL025367	Up	0.656538	0.0784455	7.7396e-05
ISC/EB-prol	LOC110678855	AAEL025367	Up	0.656538	0.0784455	7.74e-05
ISC/EB-prol	LOC5576996	AAEL003056	Up	0.637119	0.146191	0.000730177
ISC/EB-prol	LOC5576996	AAEL003056	Up	0.637119	0.146191	0.000730177
ISC/EB-prol	LOC5570219	AAEL024456	Up	0.605406	0.0773147	0.000859088
ISC/EB-prol	LOC5570219	AAEL024456	Up	0.605406	0.0773147	0.000859088
ISC/EB-prol	LOC5578306	AAEL013623	Up	0.603697	0.0596865	8.63054e-06
ISC/EB-prol	LOC5578306	AAEL013623	Up	0.603697	0.0596865	8.63e-06
ISC/EB-prol	CFI06_mgp07	-	Up	0.592353	0.0490296	0.000442912
ISC/EB-prol	CFI06_mgp07	-	Up	0.592353	0.0490296	0.000442912
ISC/EB-prol	LOC5578505	AAEL013703	Up	0.575129	0.0556579	7.21818e-05
ISC/EB-prol	LOC5578505	AAEL013703	Up	0.575129	0.0556579	7.22e-05
ISC/EB-prol	LOC5573132	AAEL002023	Up	0.574015	0.227512	0.00759848
ISC/EB-prol	LOC5573132	AAEL002023	Up	0.574015	0.227512	0.00759848
ISC/EB-prol	LOC5575550	AAEL002661	Up	0.572075	0.0462391	1.9e-06
ISC/EB-prol	LOC5575550	AAEL002661	Up	0.572075	0.0462391	1.89953e-06
ISC/EB-prol	LOC5579996	AAEL025915	Up	0.571162	0.124044	0.000359214
ISC/EB-prol	LOC5579996	AAEL025915	Up	0.571162	0.124044	0.000359214
ISC/EB-prol	LOC5566457	AAEL005428	Up	0.569087	0.0791511	6.77e-05
ISC/EB-prol	LOC5566457	AAEL005428	Up	0.569087	0.0791511	6.77409e-05
ISC/EB-prol	LOC5574092	AAEL002267	Up	0.567877	0.155905	0.000756641
ISC/EB-prol	LOC5574092	AAEL002267	Up	0.567877	0.155905	0.000756641
ISC/EB-prol	LOC5571127	AAEL019751	Up	0.554218	0.0655979	5.54e-05
ISC/EB-prol	LOC5571127	AAEL019751	Up	0.554218	0.0655979	5.54486e-05
ISC/EB-prol	LOC5570423	AAEL008330	Up	0.553174	0.15238	0.00053574
ISC/EB-prol	LOC5570423	AAEL008330	Up	0.553174	0.15238	0.00053574
ISC/EB-prol	LOC5569832	AAEL007942	Up	0.546156	0.176488	0.00342661
ISC/EB-prol	LOC5569832	AAEL007942	Up	0.546156	0.176488	0.00342661
ISC/EB-prol	LOC5563966	AAEL004025	Up	0.533772	0.0962159	0.00159849
ISC/EB-prol	LOC5563966	AAEL004025	Up	0.533772	0.0962159	0.00159849
ISC/EB-prol	LOC5579043	AAEL013987	Up	0.530836	0.0465173	1.17e-05
ISC/EB-prol	LOC5579043	AAEL013987	Up	0.530836	0.0465173	1.16955e-05
ISC/EB-prol	LOC5570114	AAEL008079	Up	0.516545	0.0833541	1.85299e-05
ISC/EB-prol	LOC5570114	AAEL008079	Up	0.516545	0.0833541	1.85e-05
ISC/EB-prol	LOC5577326	AAEL000436	Up	0.514469	0.146343	0.00168264
ISC/EB-prol	LOC5577326	AAEL000436	Up	0.514469	0.146343	0.00168264
ISC/EB-prol	LOC5568656	-	Up	0.514028	0.15498	0.00220162
ISC/EB-prol	LOC5568656	-	Up	0.514028	0.15498	0.00220162
ISC/EB-prol	LOC5578823	AAEL025277	Up	0.511253	0.172059	0.00239952
ISC/EB-prol	LOC5578823	AAEL025277	Up	0.511253	0.172059	0.00239952
ISC/EB-prol	LOC5568256	AAEL006691	Up	0.506282	0.110689	0.000429559
ISC/EB-prol	LOC5568256	AAEL006691	Up	0.506282	0.110689	0.000429559
ISC/EB-prol	LOC5569083	AAEL001209	Up	0.504876	0.116254	0.000359668
ISC/EB-prol	LOC5569083	AAEL001209	Up	0.504876	0.116254	0.000359668
ISC/EB-prol	LOC5572949	AAEL010171	Up	0.500424	0.153035	0.00268315
ISC/EB-prol	LOC5572949	AAEL010171	Up	0.500424	0.153035	0.00268315
ISC/EB-prol	LOC5572009	AAEL009480	Up	0.496985	0.177463	0.00339932
ISC/EB-prol	LOC5572009	AAEL009480	Up	0.496985	0.177463	0.00339932
ISC/EB-prol	LOC5571819	AAEL001687	Up	0.490749	0.151803	0.00316552
ISC/EB-prol	LOC5571819	AAEL001687	Up	0.490749	0.151803	0.00316552
ISC/EB-prol	CFI06_mgp05	-	Up	0.489277	0.0410161	1.14623e-05
ISC/EB-prol	CFI06_mgp05	-	Up	0.489277	0.0410161	1.15e-05
ISC/EB-prol	LOC5569895	AAEL008006	Up	0.488098	0.124417	0.000755417
ISC/EB-prol	LOC5569895	AAEL008006	Up	0.488098	0.124417	0.000755417
ISC/EB-prol	LOC5569248	AAEL007502	Up	0.487122	0.17271	0.00459908
ISC/EB-prol	LOC5569248	AAEL007502	Up	0.487122	0.17271	0.00459908
ISC/EB-prol	LOC5570115	AAEL008080	Up	0.485111	0.173424	0.00719856
ISC/EB-prol	LOC5570115	AAEL008080	Up	0.485111	0.173424	0.00719856
ISC/EB-prol	LOC5565156	AAEL004616	Up	0.483016	0.101503	0.000202866
ISC/EB-prol	LOC5565156	AAEL004616	Up	0.483016	0.101503	0.000202866
ISC/EB-prol	LOC5573200	AAEL001998	Up	0.482318	0.144097	0.0014313
ISC/EB-prol	LOC5573200	AAEL001998	Up	0.482318	0.144097	0.0014313
ISC/EB-prol	LOC5579094	AAEL003832	Up	0.475047	0.147877	0.00197385
ISC/EB-prol	LOC5579094	AAEL003832	Up	0.475047	0.147877	0.00197385
ISC/EB-prol	LOC5571039	AAEL008784	Up	0.470383	0.071224	5.53e-05
ISC/EB-prol	LOC5571039	AAEL008784	Up	0.470383	0.071224	5.52743e-05
ISC/EB-prol	LOC5572173	AAEL009590	Up	0.469484	0.0802538	0.000102661
ISC/EB-prol	LOC5572173	AAEL009590	Up	0.469484	0.0802538	0.000102661
ISC/EB-prol	LOC5575209	AAEL019722	Up	0.46776	0.164862	0.00459908
ISC/EB-prol	LOC5575209	AAEL019722	Up	0.46776	0.164862	0.00459908
ISC/EB-prol	LOC5571689	AAEL028066	Up	0.465321	0.13984	0.00174021
ISC/EB-prol	LOC5571689	AAEL028066	Up	0.465321	0.13984	0.00174022
ISC/EB-prol	LOC5574677	AAEL011319	Up	0.455387	0.101362	0.000302609
ISC/EB-prol	LOC5574677	AAEL011319	Up	0.455387	0.101362	0.000302609
ISC/EB-prol	LOC5577355	AAEL000458	Up	0.45057	0.0873502	0.00013594
ISC/EB-prol	LOC5577355	AAEL000458	Up	0.45057	0.0873502	0.00013594
ISC/EB-prol	LOC23687442	AAEL017022	Up	0.448911	0.051573	7.99e-06
ISC/EB-prol	LOC23687442	AAEL017022	Up	0.448911	0.051573	7.98858e-06
ISC/EB-prol	LOC5578590	AAEL013774	Up	0.442296	0.0726649	0.00021998
ISC/EB-prol	LOC5578590	AAEL013774	Up	0.442296	0.0726649	0.00021998
ISC/EB-prol	LOC5566677	AAEL022387	Up	0.437096	0.140692	0.00279944
ISC/EB-prol	LOC5566677	AAEL022387	Up	0.437096	0.140692	0.00279944
ISC/EB-prol	LOC5577761	AAEL003298	Up	0.436133	0.132289	0.00188568
ISC/EB-prol	LOC5577761	AAEL003298	Up	0.436133	0.132289	0.00188567
ISC/EB-prol	LOC5572372	AAEL009760	Up	0.427768	0.0521718	9.71e-06
ISC/EB-prol	LOC5572372	AAEL009760	Up	0.427768	0.0521718	9.70752e-06
ISC/EB-prol	LOC5568876	AAEL023521	Up	0.426283	0.114429	0.00117896
ISC/EB-prol	LOC5568876	AAEL023521	Up	0.426283	0.114429	0.00117896
ISC/EB-prol	LOC5572804	AAEL001898	Up	0.41891	0.137969	0.00379549
ISC/EB-prol	LOC5572804	AAEL001898	Up	0.41891	0.137969	0.00379549
ISC/EB-prol	LOC5564201	AAEL014349	Up	0.415777	0.14379	0.0039992
ISC/EB-prol	LOC5564201	AAEL014349	Up	0.415777	0.14379	0.0039992
ISC/EB-prol	LOC110676886	AAEL026085	Up	0.41224	0.0928072	0.000492968
ISC/EB-prol	LOC110676886	AAEL026085	Up	0.41224	0.0928072	0.000492968
ISC/EB-prol	LOC5570111	AAEL008097	Up	0.411643	0.138024	0.00279944
ISC/EB-prol	LOC5570111	AAEL008097	Up	0.411643	0.138024	0.00279944
ISC/EB-prol	LOC5564121	AAEL004090	Up	0.402334	0.0896569	0.000444983
ISC/EB-prol	LOC5564121	AAEL004090	Up	0.402334	0.0896569	0.000444983
ISC/EB-prol	LOC5565834	AAEL005032	Up	0.399638	0.150346	0.00559888
ISC/EB-prol	LOC5565834	AAEL005032	Up	0.399638	0.150346	0.00559888
ISC/EB-prol	LOC5576133	AAEL002812	Up	0.398573	0.165555	0.014997
ISC/EB-prol	LOC5576133	AAEL002812	Up	0.398573	0.165555	0.014997
ISC/EB-prol	LOC5566566	AAEL005481	Up	0.396512	0.143976	0.00459908
ISC/EB-prol	LOC5566566	AAEL005481	Up	0.396512	0.143976	0.00459908
ISC/EB-prol	LOC23687722	AAEL017302	Up	0.396222	0.195206	0.0303939
ISC/EB-prol	LOC23687722	AAEL017302	Up	0.396222	0.195206	0.0303939
ISC/EB-prol	LOC23687827	AAEL025574	Up	0.391739	0.0935032	0.000476669
ISC/EB-prol	LOC23687827	AAEL025574	Up	0.391739	0.0935032	0.000476669
ISC/EB-prol	LOC5572793	AAEL001906	Up	0.390508	0.0850854	0.000447676
ISC/EB-prol	LOC5572793	AAEL001906	Up	0.390508	0.0850854	0.000447676
ISC/EB-prol	LOC5570020	AAEL000182	Up	0.389214	0.0666422	0.000105328
ISC/EB-prol	LOC5570020	AAEL000182	Up	0.389214	0.0666422	0.000105328
ISC/EB-prol	LOC5566322	AAEL005289	Up	0.384681	0.133041	0.00339932
ISC/EB-prol	LOC5566322	AAEL005289	Up	0.384681	0.133041	0.00339932
ISC/EB-prol	LOC5573204	AAEL001965	Up	0.384402	0.152279	0.0089982
ISC/EB-prol	LOC5573204	AAEL001965	Up	0.384402	0.152279	0.0089982
ISC/EB-prol	LOC5567109	AAEL005832	Up	0.381986	0.093052	0.000471394
ISC/EB-prol	LOC5567109	AAEL005832	Up	0.381986	0.093052	0.000471394
ISC/EB-prol	LOC5571319	AAEL008961	Up	0.380828	0.0833754	0.000181109
ISC/EB-prol	LOC5571319	AAEL008961	Up	0.380828	0.0833754	0.000181109
ISC/EB-prol	LOC5571803	AAEL009330	Up	0.380194	0.0779191	0.000229187
ISC/EB-prol	LOC5571803	AAEL009330	Up	0.380194	0.0779191	0.000229187
ISC/EB-prol	LOC23687632	AAEL017212	Up	0.377364	0.0628754	0.000186262
ISC/EB-prol	LOC23687632	AAEL017212	Up	0.377364	0.0628754	0.000186262
ISC/EB-prol	LOC5576917	AAEL012860	Up	0.373808	0.123669	0.00319936
ISC/EB-prol	LOC5576917	AAEL012860	Up	0.373808	0.123669	0.00319936
ISC/EB-prol	LOC5572046	AAEL000227	Up	0.36663	0.17413	0.0273945
ISC/EB-prol	LOC5572046	AAEL000227	Up	0.36663	0.17413	0.0273945
ISC/EB-prol	LOC5578307	AAEL013628	Up	0.362953	0.0754527	0.000100029
ISC/EB-prol	LOC5578307	AAEL013628	Up	0.362953	0.0754527	0.000100029
ISC/EB-prol	LOC5570922	AAEL001503	Up	0.360342	0.175518	0.0343931
ISC/EB-prol	LOC5570922	AAEL001503	Up	0.360342	0.175518	0.0343931
ISC/EB-prol	LOC5565700	AAEL004930	Up	0.359758	0.0710806	0.000550687
ISC/EB-prol	LOC5565700	AAEL004930	Up	0.359758	0.0710806	0.000550687
ISC/EB-prol	LOC5578360	AAEL024675	Up	0.358773	0.12363	0.00339932
ISC/EB-prol	LOC5578360	AAEL024675	Up	0.358773	0.12363	0.00339932
ISC/EB-prol	LOC5575395	AAEL011803	Up	0.352491	0.129902	0.00659868
ISC/EB-prol	LOC5575395	AAEL011803	Up	0.352491	0.129902	0.00659868
ISC/EB-prol	LOC5564118	AAEL004118	Up	0.348989	0.101844	0.00174805
ISC/EB-prol	LOC5564118	AAEL004118	Up	0.348989	0.101844	0.00174805
ISC/EB-prol	LOC5564053	AAEL004060	Up	0.34443	0.0548485	7.32545e-05
ISC/EB-prol	LOC5564053	AAEL004060	Up	0.34443	0.0548485	7.33e-05
ISC/EB-prol	CFI06_mgp03	-	Up	0.343062	0.0471416	4.42e-05
ISC/EB-prol	CFI06_mgp03	-	Up	0.343062	0.0471416	4.42339e-05
ISC/EB-prol	LOC5572646	AAEL001847	Up	0.341348	0.131133	0.00919816
ISC/EB-prol	LOC5572646	AAEL001847	Up	0.341348	0.131133	0.00919816
ISC/EB-prol	LOC5565951	AAEL024837	Up	0.339048	0.161213	0.0303939
ISC/EB-prol	LOC5565951	AAEL024837	Up	0.339048	0.161213	0.0303939
ISC/EB-prol	LOC5576124	AAEL002811	Up	0.335044	0.0917556	0.000834576
ISC/EB-prol	LOC5576124	AAEL002811	Up	0.335044	0.0917556	0.000834576
ISC/EB-prol	LOC5577919	AAEL003344	Up	0.324568	0.156062	0.0377924
ISC/EB-prol	LOC5577919	AAEL003344	Up	0.324568	0.156062	0.0377924
ISC/EB-prol	LOC5568046	AAEL006483	Up	0.322817	0.0665541	9.86369e-05
ISC/EB-prol	LOC5568046	AAEL006483	Up	0.322817	0.0665541	9.86e-05
ISC/EB-prol	LOC5570558	AAEL008364	Up	0.321859	0.116623	0.00339932
ISC/EB-prol	LOC5570558	AAEL008364	Up	0.321859	0.116623	0.00339932
ISC/EB-prol	LOC5573295	AAEL010382	Up	0.316942	0.14019	0.0211958
ISC/EB-prol	LOC5573295	AAEL010382	Up	0.316942	0.14019	0.0211958
ISC/EB-prol	LOC5571086	AAEL026403	Up	0.313574	0.125533	0.0069986
ISC/EB-prol	LOC5571086	AAEL026403	Up	0.313574	0.125533	0.0069986
ISC/EB-prol	LOC110676375		Up	0.311449	0.120123	0.00739852
ISC/EB-prol	LOC110676375		Up	0.311449	0.120123	0.00739852
ISC/EB-prol	LOC5568253	AAEL006699	Up	0.310487	0.106226	0.0029994
ISC/EB-prol	LOC5568253	AAEL006699	Up	0.310487	0.106226	0.0029994
ISC/EB-prol	LOC5569681	AAEL007818	Up	0.308683	0.0398257	7.25181e-05
ISC/EB-prol	LOC5569681	AAEL007818	Up	0.308683	0.0398257	7.25e-05
ISC/EB-prol	LOC5568487	AAEL006902	Up	0.308106	0.126936	0.0143971
ISC/EB-prol	LOC5568487	AAEL006902	Up	0.308106	0.126936	0.0143971
ISC/EB-prol	LOC5567691	AAEL006283	Up	0.302141	0.126718	0.0143971
ISC/EB-prol	LOC5567691	AAEL006283	Up	0.302141	0.126718	0.0143971
ISC/EB-prol	LOC5568570	AAEL001141	Up	0.29895	0.10615	0.00459908
ISC/EB-prol	LOC5568570	AAEL001141	Up	0.29895	0.10615	0.00459908
ISC/EB-prol	LOC5575663	AAEL002690	Up	0.296342	0.132635	0.0255949
ISC/EB-prol	LOC5575663	AAEL002690	Up	0.296342	0.132635	0.0255949
ISC/EB-prol	LOC5572524	AAEL023271	Up	0.294778	0.155054	0.0491902
ISC/EB-prol	LOC5572524	AAEL023271	Up	0.294778	0.155054	0.0491902
ISC/EB-prol	LOC110678695	AAEL028145	Up	0.29254	0.145391	0.034993
ISC/EB-prol	LOC110678695	AAEL028145	Up	0.29254	0.145391	0.034993
ISC/EB-prol	CFI06_mgp06	-	Up	0.292408	0.0463856	4.24e-05
ISC/EB-prol	CFI06_mgp06	-	Up	0.292408	0.0463856	4.24237e-05
ISC/EB-prol	LOC5576040	AAEL012276	Up	0.287425	0.152159	0.0463907
ISC/EB-prol	LOC5576040	AAEL012276	Up	0.287425	0.152159	0.0463907
ISC/EB-prol	LOC5579338	AAEL025607	Up	0.285811	0.147366	0.0439912
ISC/EB-prol	LOC5579338	AAEL025607	Up	0.285811	0.147366	0.0439912
ISC/EB-prol	LOC5577377	AAEL000428	Up	0.284945	0.146729	0.0427914
ISC/EB-prol	LOC5577377	AAEL000428	Up	0.284945	0.146729	0.0427914
ISC/EB-prol	LOC5570312	AAEL008249	Up	0.278994	0.116082	0.0139972
ISC/EB-prol	LOC5570312	AAEL008249	Up	0.278994	0.116082	0.0139972
ISC/EB-prol	LOC5569166	AAEL007431	Up	0.276254	0.0821019	0.00185013
ISC/EB-prol	LOC5569166	AAEL007431	Up	0.276254	0.0821019	0.00185013
ISC/EB-prol	LOC5563670	AAEL000543	Up	0.270574	0.138174	0.0377924
ISC/EB-prol	LOC5563670	AAEL000543	Up	0.270574	0.138174	0.0377924
ISC/EB-prol	LOC110678983	AAEL025807	Up	0.269342	0.0988336	0.00479904
ISC/EB-prol	LOC110678983	AAEL025807	Up	0.269342	0.0988336	0.00479904
ISC/EB-prol	LOC5568717	AAEL007043	Up	0.267667	0.103892	0.00879824
ISC/EB-prol	LOC5568717	AAEL007043	Up	0.267667	0.103892	0.00879824
ISC/EB-prol	LOC5575041	AAEL011588	Up	0.26553	0.130956	0.0395921
ISC/EB-prol	LOC5575041	AAEL011588	Up	0.26553	0.130956	0.0395921
ISC/EB-prol	LOC5575982	AAEL019430	Up	0.260112	0.0911795	0.00259948
ISC/EB-prol	LOC5575982	AAEL019430	Up	0.260112	0.0911795	0.00259948
ISC/EB-prol	LOC110675610	AAEL026008	Up	0.25905	0.0233328	7.99e-06
ISC/EB-prol	LOC110675610	AAEL026008	Up	0.25905	0.0233328	7.99378e-06
ISC/EB-prol	LOC110678629	AAEL028247	Up	0.254007	0.0423169	2.51e-05
ISC/EB-prol	LOC110678629	AAEL028247	Up	0.254007	0.0423169	2.50763e-05
ISC/EB-prol	LOC5564809	AAEL014630	Up	0.251825	0.12356	0.0315937
ISC/EB-prol	LOC5564809	AAEL014630	Up	0.251825	0.12356	0.0315937
ISC/EB-prol	LOC5576995	AAEL003066	Up	0.238784	0.0998451	0.014797
ISC/EB-prol	LOC5576995	AAEL003066	Up	0.238784	0.0998451	0.014797
ISC/EB-prol	LOC5571712	AAEL009244	Up	0.238258	0.0752371	0.00218269
ISC/EB-prol	LOC5571712	AAEL009244	Up	0.238258	0.0752371	0.00218269
ISC/EB-prol	LOC5566497		Up	0.235505	0.0365275	6.93e-05
ISC/EB-prol	LOC5566497		Up	0.235505	0.0365275	6.93186e-05
ISC/EB-prol	LOC5566166	AAEL005221	Up	0.235375	0.108922	0.029994
ISC/EB-prol	LOC5566166	AAEL005221	Up	0.235375	0.108922	0.029994
ISC/EB-prol	LOC5574975	AAEL002526	Up	0.229071	0.0774846	0.00279944
ISC/EB-prol	LOC5574975	AAEL002526	Up	0.229071	0.0774846	0.00279944
ISC/EB-prol	LOC5568254	AAEL006702	Up	0.228876	0.0944058	0.0115977
ISC/EB-prol	LOC5568254	AAEL006702	Up	0.228876	0.0944058	0.0115977
ISC/EB-prol	LOC5567214	AAEL028205	Up	0.225103	0.0522192	0.000293504
ISC/EB-prol	LOC5567214	AAEL028205	Up	0.225103	0.0522192	0.000293504
ISC/EB-prol	LOC5579654	AAEL003970	Up	0.223308	0.089868	0.00859828
ISC/EB-prol	LOC5579654	AAEL003970	Up	0.223308	0.089868	0.00859828
ISC/EB-prol	LOC5571955	AAEL026633	Up	0.216886	0.0772876	0.00539892
ISC/EB-prol	LOC5571955	AAEL026633	Up	0.216886	0.0772876	0.00539892
ISC/EB-prol	LOC5576966	AAEL003060	Up	0.213831	0.038754	0.000125354
ISC/EB-prol	LOC5576966	AAEL003060	Up	0.213831	0.038754	0.000125354
ISC/EB-prol	LOC5570339	AAEL019977	Up	0.21244	0.0925486	0.0183963
ISC/EB-prol	LOC5570339	AAEL019977	Up	0.21244	0.0925486	0.0183963
ISC/EB-prol	LOC5564874	AAEL004460	Up	0.206873	0.055234	0.000796503
ISC/EB-prol	LOC5564874	AAEL004460	Up	0.206873	0.055234	0.000796503
ISC/EB-prol	LOC5567207	AAEL000902	Up	0.204175	0.102618	0.0409918
ISC/EB-prol	LOC5567207	AAEL000902	Up	0.204175	0.102618	0.0409918
ISC/EB-prol	LOC5576468	AAEL002903	Up	0.203251	0.0618561	0.00176392
ISC/EB-prol	LOC5576468	AAEL002903	Up	0.203251	0.0618561	0.00176392
ISC/EB-prol	LOC110677182	-	Up	0.202174	0.0213168	0.000601934
ISC/EB-prol	LOC110677182	-	Up	0.202174	0.0213168	0.000601934
ISC/EB-prol	CFI06_mgp01	-	Up	0.195138	0.0532126	0.00121461
ISC/EB-prol	CFI06_mgp01	-	Up	0.195138	0.0532126	0.00121461
ISC/EB-prol	LOC5564584	AAEL004338	Up	0.193215	0.100983	0.044791
ISC/EB-prol	LOC5564584	AAEL004338	Up	0.193215	0.100983	0.044791
ISC/EB-prol	LOC5569670	AAEL007824	Up	0.172744	0.0136043	3.96088e-06
ISC/EB-prol	LOC5569670	AAEL007824	Up	0.172744	0.0136043	3.96e-06
ISC/EB-prol	LOC5574109	AAEL002263	Up	0.172152	0.0787836	0.019796
ISC/EB-prol	LOC5574109	AAEL002263	Up	0.172152	0.0787836	0.019796
ISC/EB-prol	LOC5570622	AAEL008428	Up	0.153445	0.0635217	0.0131974
ISC/EB-prol	LOC5570622	AAEL008428	Up	0.153445	0.0635217	0.0131974
ISC/EB-prol	LOC5570871	AAEL019868	Up	0.131923	0.0586732	0.0177964
ISC/EB-prol	LOC5570871	AAEL019868	Up	0.131923	0.0586732	0.0177964
ISC/EB-prol	LOC23687450	AAEL017030	Up	0.111366	0.0574992	0.0409918
ISC/EB-prol	LOC23687450	AAEL017030	Up	0.111366	0.0574992	0.0409918
ISC/EB-prol	LOC5563695	AAEL000549	Up	0.1054	0.0265313	0.000781604
ISC/EB-prol	LOC5563695	AAEL000549	Up	0.1054	0.0265313	0.000781604
ISC/EB-prol	CFI06_mgp09	-	Up	0.0952683	0.0280079	0.00109247
ISC/EB-prol	CFI06_mgp09	-	Up	0.0952683	0.0280079	0.00109247
ISC/EB-prol	LOC5571844	AAEL001703	Up	0.0940914	0.04032	0.0113977
ISC/EB-prol	LOC5571844	AAEL001703	Up	0.0940914	0.04032	0.0113977
ISC/EB-prol	LOC5564259	AAEL022285	Up	0.0744184	0.0387322	0.0355929
ISC/EB-prol	LOC5564259	AAEL022285	Up	0.0744184	0.0387322	0.0355929
ISC/EB-prol	CFI06_mgp11	-	Up	0.0608191	0.0240232	0.00579884
ISC/EB-prol	CFI06_mgp11	-	Up	0.0608191	0.0240232	0.00579884
ISC/EB-prol	CFI06_mgr02	-	Down	-0.0604777	0.0160178	0.00451044
ISC/EB-prol	CFI06_mgr02	-	Down	-0.0604777	0.0160178	0.00451044
ISC/EB-prol	CFI06_mgp02	-	Down	-0.0703578	0.0262816	0.0245951
ISC/EB-prol	CFI06_mgp02	-	Down	-0.0703578	0.0262816	0.0245951
ISC/EB-prol	LOC5568211	AAEL006642	Down	-0.10114	0.0286665	0.00487479
ISC/EB-prol	LOC5568211	AAEL006642	Down	-0.10114	0.0286665	0.00487479
ISC/EB-prol	LOC5571735	AAEL009257	Down	-0.103714	0.0460397	0.0431914
ISC/EB-prol	LOC5571735	AAEL009257	Down	-0.103714	0.0460397	0.0431914
ISC/EB-prol	LOC5571927	AAEL020290	Down	-0.105239	0.0136849	1.78487e-05
ISC/EB-prol	LOC5571927	AAEL020290	Down	-0.105239	0.0136849	1.78e-05
ISC/EB-prol	LOC5567341	AAEL006011	Down	-0.106681	0.0398252	0.014997
ISC/EB-prol	LOC5567341	AAEL006011	Down	-0.106681	0.0398252	0.014997
ISC/EB-prol	LOC5568303	AAEL006751	Down	-0.109369	0.0468743	0.034793
ISC/EB-prol	LOC5568303	AAEL006751	Down	-0.109369	0.0468743	0.034793
ISC/EB-prol	LOC5572931	AAEL010145	Down	-0.115279	0.0526069	0.0453909
ISC/EB-prol	LOC5572931	AAEL010145	Down	-0.115279	0.0526069	0.0453909
ISC/EB-prol	LOC5577999	AAEL003393	Down	-0.115398	0.052243	0.0369926
ISC/EB-prol	LOC5577999	AAEL003393	Down	-0.115398	0.052243	0.0369926
ISC/EB-prol	LOC5568465	AAEL006860	Down	-0.116097	0.0159416	0.000458529
ISC/EB-prol	LOC5568465	AAEL006860	Down	-0.116097	0.0159416	0.000458529
ISC/EB-prol	LOC5565553	AAEL022140	Down	-0.116365	0.0117155	0.000605608
ISC/EB-prol	LOC5565553	AAEL022140	Down	-0.116365	0.0117155	0.000605608
ISC/EB-prol	LOC23687618	AAEL017198	Down	-0.117719	0.0120237	0.00052104
ISC/EB-prol	LOC23687618	AAEL017198	Down	-0.117719	0.0120237	0.00052104
ISC/EB-prol	LOC5576107	AAEL002813	Down	-0.119643	0.0529966	0.0339932
ISC/EB-prol	LOC5576107	AAEL002813	Down	-0.119643	0.0529966	0.0339932
ISC/EB-prol	LOC5573964	AAEL010819	Down	-0.128841	0.0530019	0.0237952
ISC/EB-prol	LOC5573964	AAEL010819	Down	-0.128841	0.0530019	0.0237952
ISC/EB-prol	LOC5569738	AAEL007868	Down	-0.12916	0.0556629	0.0411918
ISC/EB-prol	LOC5569738	AAEL007868	Down	-0.12916	0.0556629	0.0411918
ISC/EB-prol	CFI06_mgp12	-	Down	-0.130911	0.0188999	0.000110285
ISC/EB-prol	CFI06_mgp12	-	Down	-0.130911	0.0188999	0.000110285
ISC/EB-prol	LOC5575898	AAEL002737	Down	-0.133068	0.0395469	0.00326599
ISC/EB-prol	LOC5575898	AAEL002737	Down	-0.133068	0.0395469	0.00326599
ISC/EB-prol	LOC23687432	AAEL017012	Down	-0.133195	0.059604	0.0391922
ISC/EB-prol	LOC23687432	AAEL017012	Down	-0.133195	0.059604	0.0391922
ISC/EB-prol	LOC5576353	AAEL002881	Down	-0.133211	0.0431748	0.00379924
ISC/EB-prol	LOC5576353	AAEL002881	Down	-0.133211	0.0431748	0.00379924
ISC/EB-prol	LOC5564133	AAEL004088	Down	-0.133876	0.0462509	0.00959808
ISC/EB-prol	LOC5564133	AAEL004088	Down	-0.133876	0.0462509	0.00959808
ISC/EB-prol	LOC5566976	AAEL005744	Down	-0.134069	0.0564453	0.0279944
ISC/EB-prol	LOC5566976	AAEL005744	Down	-0.134069	0.0564453	0.0279944
ISC/EB-prol	LOC5575394	AAEL019974	Down	-0.135524	0.0626418	0.0455909
ISC/EB-prol	LOC5575394	AAEL019974	Down	-0.135524	0.0626418	0.0455909
ISC/EB-prol	LOC5565405	AAEL014843	Down	-0.136572	0.0507684	0.0187962
ISC/EB-prol	LOC5565405	AAEL014843	Down	-0.136572	0.0507684	0.0187962
ISC/EB-prol	LOC5575450	AAEL002639	Down	-0.139198	0.0157656	0.000700286
ISC/EB-prol	LOC5575450	AAEL002639	Down	-0.139198	0.0157656	0.000700286
ISC/EB-prol	LOC5575642	AAEL011985	Down	-0.145914	0.0628608	0.0355929
ISC/EB-prol	LOC5575642	AAEL011985	Down	-0.145914	0.0628608	0.0355929
ISC/EB-prol	LOC5569984	AAEL008073	Down	-0.146135	0.0570424	0.019996
ISC/EB-prol	LOC5569984	AAEL008073	Down	-0.146135	0.0570424	0.019996
ISC/EB-prol	LOC5564516	AAEL004284	Down	-0.147051	0.062186	0.0253949
ISC/EB-prol	LOC5564516	AAEL004284	Down	-0.147051	0.062186	0.0253949
ISC/EB-prol	LOC5576362	AAEL002879	Down	-0.148746	0.0483019	0.00339932
ISC/EB-prol	LOC5576362	AAEL002879	Down	-0.148746	0.0483019	0.00339932
ISC/EB-prol	LOC5575492	AAEL011871	Down	-0.148772	0.0561898	0.014797
ISC/EB-prol	LOC5575492	AAEL011871	Down	-0.148772	0.0561898	0.014797
ISC/EB-prol	LOC5578900	AAEL013904	Down	-0.151436	0.0702078	0.0385923
ISC/EB-prol	LOC5578900	AAEL013904	Down	-0.151436	0.0702078	0.0385923
ISC/EB-prol	LOC23687495	AAEL017075	Down	-0.152363	0.0322245	0.00072699
ISC/EB-prol	LOC23687495	AAEL017075	Down	-0.152363	0.0322245	0.00072699
ISC/EB-prol	LOC5566484	AAEL005401	Down	-0.152844	0.0642573	0.029794
ISC/EB-prol	LOC5566484	AAEL005401	Down	-0.152844	0.0642573	0.029794
ISC/EB-prol	LOC5571006	AAEL008738	Down	-0.153458	0.0565587	0.014997
ISC/EB-prol	LOC5571006	AAEL008738	Down	-0.153458	0.0565587	0.014997
ISC/EB-prol	LOC5571544	AAEL009129	Down	-0.157031	0.0561461	0.00879824
ISC/EB-prol	LOC5571544	AAEL009129	Down	-0.157031	0.0561461	0.00879824
ISC/EB-prol	LOC5571084	AAEL008789	Down	-0.158342	0.0528971	0.00619876
ISC/EB-prol	LOC5571084	AAEL008789	Down	-0.158342	0.0528971	0.00619876
ISC/EB-prol	LOC5571937	AAEL009422	Down	-0.169064	0.0571331	0.00419916
ISC/EB-prol	LOC5571937	AAEL009422	Down	-0.169064	0.0571331	0.00419916
ISC/EB-prol	LOC5564011	AAEL014272	Down	-0.174121	0.0749435	0.0277944
ISC/EB-prol	LOC5564011	AAEL014272	Down	-0.174121	0.0749435	0.0277944
ISC/EB-prol	LOC5564212	AAEL004151	Down	-0.175303	0.0148684	5.35e-06
ISC/EB-prol	LOC5564212	AAEL004151	Down	-0.175303	0.0148684	5.34762e-06
ISC/EB-prol	LOC5578927	AAEL003750	Down	-0.175444	0.0270159	0.000192033
ISC/EB-prol	LOC5578927	AAEL003750	Down	-0.175444	0.0270159	0.000192033
ISC/EB-prol	LOC5565389	AAEL004777	Down	-0.178274	0.0797959	0.0357928
ISC/EB-prol	LOC5565389	AAEL004777	Down	-0.178274	0.0797959	0.0357928
ISC/EB-prol	LOC5572891	AAEL010099	Down	-0.178374	0.078178	0.0417916
ISC/EB-prol	LOC5572891	AAEL010099	Down	-0.178374	0.078178	0.0417916
ISC/EB-prol	LOC5570108	AAEL020238	Down	-0.178522	0.017072	0.000445531
ISC/EB-prol	LOC5570108	AAEL020238	Down	-0.178522	0.017072	0.000445531
ISC/EB-prol	LOC5577489	AAEL013229	Down	-0.178627	0.0415781	0.00215929
ISC/EB-prol	LOC5577489	AAEL013229	Down	-0.178627	0.0415781	0.00215929
ISC/EB-prol	LOC5569632	AAEL007777	Down	-0.18085	0.0756688	0.0239952
ISC/EB-prol	LOC5569632	AAEL007777	Down	-0.18085	0.0756688	0.0239952
ISC/EB-prol	LOC5577910	AAEL003352	Down	-0.181547	0.0599723	0.00479904
ISC/EB-prol	LOC5577910	AAEL003352	Down	-0.181547	0.0599723	0.00479904
ISC/EB-prol	LOC5570887	AAEL018161	Down	-0.181768	0.0635867	0.00519896
ISC/EB-prol	LOC5570887	AAEL018161	Down	-0.181768	0.0635867	0.00519896
ISC/EB-prol	LOC5566522	AAEL005451	Down	-0.182546	0.0128581	4.27698e-06
ISC/EB-prol	LOC5566522	AAEL005451	Down	-0.182546	0.0128581	4.28e-06
ISC/EB-prol	LOC5564925	AAEL019568	Down	-0.184435	0.0244999	3e-05
ISC/EB-prol	LOC5564925	AAEL019568	Down	-0.184435	0.0244999	3.00281e-05
ISC/EB-prol	LOC5571685	AAEL009214	Down	-0.185399	0.0703513	0.0141972
ISC/EB-prol	LOC5571685	AAEL009214	Down	-0.185399	0.0703513	0.0141972
ISC/EB-prol	LOC5574429	AAEL011157	Down	-0.187422	0.0839933	0.0427914
ISC/EB-prol	LOC5574429	AAEL011157	Down	-0.187422	0.0839933	0.0427914
ISC/EB-prol	LOC5565931	AAEL025321	Down	-0.188135	0.0628411	0.00359928
ISC/EB-prol	LOC5565931	AAEL025321	Down	-0.188135	0.0628411	0.00359928
ISC/EB-prol	LOC5573863	AAEL010765	Down	-0.189066	0.0427577	0.000572382
ISC/EB-prol	LOC5573863	AAEL010765	Down	-0.189066	0.0427577	0.000572382
ISC/EB-prol	LOC5579199	AAEL014039	Down	-0.192447	0.0414562	9.04e-05
ISC/EB-prol	LOC5579199	AAEL014039	Down	-0.192447	0.0414562	9.03991e-05
ISC/EB-prol	LOC5564091	AAEL028021	Down	-0.195495	0.062123	0.00239952
ISC/EB-prol	LOC5564091	AAEL028021	Down	-0.195495	0.062123	0.00239952
ISC/EB-prol	LOC5564196	AAEL014348	Down	-0.196303	0.0472245	0.000998574
ISC/EB-prol	LOC5564196	AAEL014348	Down	-0.196303	0.0472245	0.000998574
ISC/EB-prol	LOC5577327	AAEL000410	Down	-0.197323	0.0873023	0.029794
ISC/EB-prol	LOC5577327	AAEL000410	Down	-0.197323	0.0873023	0.029794
ISC/EB-prol	LOC5564713	AAEL014583	Down	-0.200767	0.0120482	1.76e-06
ISC/EB-prol	LOC5564713	AAEL014583	Down	-0.200767	0.0120482	1.75787e-06
ISC/EB-prol	LOC5579871	AAEL005985	Down	-0.204565	0.0516602	0.000300427
ISC/EB-prol	LOC5579871	AAEL005985	Down	-0.204565	0.0516602	0.000300427
ISC/EB-prol	LOC5564962	AAEL014889	Down	-0.204874	0.0863522	0.0207958
ISC/EB-prol	LOC5564962	AAEL014889	Down	-0.204874	0.0863522	0.0207958
ISC/EB-prol	LOC23687901	AAEL017481	Down	-0.205515	0.0376534	0.00081466
ISC/EB-prol	LOC23687901	AAEL017481	Down	-0.205515	0.0376534	0.00081466
ISC/EB-prol	LOC5574966	AAEL002527	Down	-0.206049	0.0481042	0.000501514
ISC/EB-prol	LOC5574966	AAEL002527	Down	-0.206049	0.0481042	0.000501514
ISC/EB-prol	LOC5576079	AAEL012317	Down	-0.206173	0.0842509	0.0191962
ISC/EB-prol	LOC5576079	AAEL012317	Down	-0.206173	0.0842509	0.0191962
ISC/EB-prol	LOC5574496	AAEL002399	Down	-0.208677	0.0849722	0.0179964
ISC/EB-prol	LOC5574496	AAEL002399	Down	-0.208677	0.0849722	0.0179964
ISC/EB-prol	LOC5576223	AAEL002825	Down	-0.210552	0.0837704	0.0187962
ISC/EB-prol	LOC5576223	AAEL002825	Down	-0.210552	0.0837704	0.0187962
ISC/EB-prol	LOC5563786	AAEL003942	Down	-0.212039	0.0132905	0.000276786
ISC/EB-prol	LOC5563786	AAEL003942	Down	-0.212039	0.0132905	0.000276786
ISC/EB-prol	LOC5578745	AAEL019555	Down	-0.212267	0.0915432	0.0239952
ISC/EB-prol	LOC5578745	AAEL019555	Down	-0.212267	0.0915432	0.0239952
ISC/EB-prol	LOC5575848	AAEL012113	Down	-0.212672	0.0620013	0.00256553
ISC/EB-prol	LOC5575848	AAEL012113	Down	-0.212672	0.0620013	0.00256553
ISC/EB-prol	LOC5574333	AAEL002337	Down	-0.215049	0.0911699	0.0229954
ISC/EB-prol	LOC5574333	AAEL002337	Down	-0.215049	0.0911699	0.0229954
ISC/EB-prol	LOC5574383	AAEL011102	Down	-0.216081	0.0754728	0.0089982
ISC/EB-prol	LOC5574383	AAEL011102	Down	-0.216081	0.0754728	0.0089982
ISC/EB-prol	LOC5574072	AAEL010909	Down	-0.217382	0.10756	0.0491902
ISC/EB-prol	LOC5574072	AAEL010909	Down	-0.217382	0.10756	0.0491902
ISC/EB-prol	LOC5564226	-	Down	-0.223752	0.0174644	0.000349463
ISC/EB-prol	LOC5564226	-	Down	-0.223752	0.0174644	0.000349463
ISC/EB-prol	LOC5569122	AAEL007383	Down	-0.227706	0.0490307	0.000338143
ISC/EB-prol	LOC5569122	AAEL007383	Down	-0.227706	0.0490307	0.000338143
ISC/EB-prol	LOC5571429	AAEL009066	Down	-0.22832	0.0874098	0.0143971
ISC/EB-prol	LOC5571429	AAEL009066	Down	-0.22832	0.0874098	0.0143971
ISC/EB-prol	LOC5568708	AAEL007054	Down	-0.230691	0.0730446	0.00359928
ISC/EB-prol	LOC5568708	AAEL007054	Down	-0.230691	0.0730446	0.00359928
ISC/EB-prol	LOC5564581	AAEL004347	Down	-0.231688	0.0798411	0.00659868
ISC/EB-prol	LOC5564581	AAEL004347	Down	-0.231688	0.0798411	0.00659868
ISC/EB-prol	LOC5567383	AAEL006061	Down	-0.231933	0.0955719	0.0231954
ISC/EB-prol	LOC5567383	AAEL006061	Down	-0.231933	0.0955719	0.0231954
ISC/EB-prol	LOC5565159	AAEL004613	Down	-0.233007	0.115126	0.0487902
ISC/EB-prol	LOC5565159	AAEL004613	Down	-0.233007	0.115126	0.0487902
ISC/EB-prol	LOC5571785	AAEL009313	Down	-0.234011	0.0314603	8.82e-06
ISC/EB-prol	LOC5571785	AAEL009313	Down	-0.234011	0.0314603	8.82375e-06
ISC/EB-prol	LOC5576653	AAEL012686	Down	-0.234281	0.0137937	1.75042e-06
ISC/EB-prol	LOC5576653	AAEL012686	Down	-0.234281	0.0137937	1.75e-06
ISC/EB-prol	LOC5566525	AAEL005455	Down	-0.235548	0.115211	0.0481904
ISC/EB-prol	LOC5566525	AAEL005455	Down	-0.235548	0.115211	0.0481904
ISC/EB-prol	LOC5577284	AAEL013138	Down	-0.236066	0.105098	0.0307938
ISC/EB-prol	LOC5577284	AAEL013138	Down	-0.236066	0.105098	0.0307938
ISC/EB-prol	LOC5572968	AAEL010168	Down	-0.236539	0.0163689	0.00019472
ISC/EB-prol	LOC5572968	AAEL010168	Down	-0.236539	0.0163689	0.00019472
ISC/EB-prol	LOC5565328	AAEL004727	Down	-0.237305	0.10071	0.0229954
ISC/EB-prol	LOC5565328	AAEL004727	Down	-0.237305	0.10071	0.0229954
ISC/EB-prol	LOC5564781	AAEL004419	Down	-0.23759	0.0788436	0.00339932
ISC/EB-prol	LOC5564781	AAEL004419	Down	-0.23759	0.0788436	0.00339932
ISC/EB-prol	LOC5569520	AAEL007707	Down	-0.237917	0.0522972	0.000490267
ISC/EB-prol	LOC5569520	AAEL007707	Down	-0.237917	0.0522972	0.000490267
ISC/EB-prol	LOC5570883	AAEL008658	Down	-0.23884	0.0917448	0.0135973
ISC/EB-prol	LOC5570883	AAEL008658	Down	-0.23884	0.0917448	0.0135973
ISC/EB-prol	LOC5567491	AAEL000951	Down	-0.239076	0.021891	0.000507207
ISC/EB-prol	LOC5567491	AAEL000951	Down	-0.239076	0.021891	0.000507207
ISC/EB-prol	LOC5565400	AAEL004783	Down	-0.239111	0.0461111	0.000186498
ISC/EB-prol	LOC5565400	AAEL004783	Down	-0.239111	0.0461111	0.000186498
ISC/EB-prol	LOC5576901	AAEL014640	Down	-0.240036	0.0904696	0.0107978
ISC/EB-prol	LOC5576901	AAEL014640	Down	-0.240036	0.0904695	0.0107978
ISC/EB-prol	LOC5568219	AAEL006661	Down	-0.241535	0.107292	0.034993
ISC/EB-prol	LOC5568219	AAEL006661	Down	-0.241535	0.107293	0.034993
ISC/EB-prol	LOC5570007	AAEL000175	Down	-0.24155	0.0546528	0.000514631
ISC/EB-prol	LOC5570007	AAEL000175	Down	-0.24155	0.0546528	0.000514631
ISC/EB-prol	LOC5580074	AAEL002178	Down	-0.242696	0.0915063	0.0155969
ISC/EB-prol	LOC5580074	AAEL002178	Down	-0.242696	0.0915063	0.0155969
ISC/EB-prol	LOC5577930	AAEL025363	Down	-0.242885	0.111963	0.0413917
ISC/EB-prol	LOC5577930	AAEL025363	Down	-0.242885	0.111963	0.0413917
ISC/EB-prol	LOC5566385	AAEL019833	Down	-0.243015	0.0832777	0.00759848
ISC/EB-prol	LOC5566385	AAEL019833	Down	-0.243015	0.0832777	0.00759848
ISC/EB-prol	LOC5568367	AAEL001092	Down	-0.243796	0.099213	0.0169966
ISC/EB-prol	LOC5568367	AAEL001092	Down	-0.243796	0.099213	0.0169966
ISC/EB-prol	LOC5567259	AAEL005931	Down	-0.244518	0.0946649	0.0123975
ISC/EB-prol	LOC5567259	AAEL005931	Down	-0.244518	0.0946649	0.0123975
ISC/EB-prol	LOC5571907	AAEL009414	Down	-0.245366	0.0881197	0.00879824
ISC/EB-prol	LOC5571907	AAEL009414	Down	-0.245366	0.0881197	0.00879824
ISC/EB-prol	LOC5566474	AAEL005400	Down	-0.247231	0.08254	0.00519896
ISC/EB-prol	LOC5566474	AAEL005400	Down	-0.247231	0.08254	0.00519896
ISC/EB-prol	LOC5580315	AAEL012897	Down	-0.247364	0.0974229	0.0103979
ISC/EB-prol	LOC5580315	AAEL012897	Down	-0.247364	0.0974229	0.0103979
ISC/EB-prol	LOC5572256	AAEL020559	Down	-0.247417	0.110551	0.0325935
ISC/EB-prol	LOC5572256	AAEL020559	Down	-0.247417	0.110551	0.0325935
ISC/EB-prol	LOC5574382	AAEL011099	Down	-0.247854	0.0618028	0.00128443
ISC/EB-prol	LOC5574382	AAEL011099	Down	-0.247854	0.0618028	0.00128443
ISC/EB-prol	LOC5568611	AAEL006976	Down	-0.248757	0.0794535	0.00279944
ISC/EB-prol	LOC5568611	AAEL006976	Down	-0.248757	0.0794535	0.00279944
ISC/EB-prol	LOC5577777	AAEL003285	Down	-0.249141	0.0733388	0.00257376
ISC/EB-prol	LOC5577777	AAEL003285	Down	-0.249141	0.0733388	0.00257376
ISC/EB-prol	LOC5569143	AAEL007403	Down	-0.250361	0.0717744	0.00177002
ISC/EB-prol	LOC5569143	AAEL007403	Down	-0.250361	0.0717744	0.00177002
ISC/EB-prol	LOC5565050	AAEL004546	Down	-0.250508	0.120257	0.0455909
ISC/EB-prol	LOC5565050	AAEL004546	Down	-0.250508	0.120257	0.0455909
ISC/EB-prol	LOC5577369	AAEL000454	Down	-0.250568	0.0674782	0.00187193
ISC/EB-prol	LOC5577369	AAEL000454	Down	-0.250568	0.0674782	0.00187193
ISC/EB-prol	LOC5574502	AAEL002375	Down	-0.251539	0.105553	0.0269946
ISC/EB-prol	LOC5574502	AAEL002375	Down	-0.251539	0.105553	0.0269946
ISC/EB-prol	LOC5565541	AAEL004829	Down	-0.252371	0.0576525	0.00062616
ISC/EB-prol	LOC5565541	AAEL004829	Down	-0.252371	0.0576525	0.00062616
ISC/EB-prol	LOC5567454	AAEL000944	Down	-0.252997	0.0892629	0.0109978
ISC/EB-prol	LOC5567454	AAEL000944	Down	-0.252997	0.0892629	0.0109978
ISC/EB-prol	LOC5576914	AAEL012865	Down	-0.253661	0.0954198	0.0109978
ISC/EB-prol	LOC5576914	AAEL012865	Down	-0.253661	0.0954198	0.0109978
ISC/EB-prol	LOC5570654	AAEL008458	Down	-0.254179	0.123537	0.0487902
ISC/EB-prol	LOC5570654	AAEL008458	Down	-0.254179	0.123537	0.0487902
ISC/EB-prol	LOC5569181	AAEL007441	Down	-0.254337	0.0661354	0.00117877
ISC/EB-prol	LOC5569181	AAEL007441	Down	-0.254337	0.0661354	0.00117877
ISC/EB-prol	LOC5568583	AAEL001113	Down	-0.254738	0.0941398	0.009998
ISC/EB-prol	LOC5568583	AAEL001113	Down	-0.254738	0.0941398	0.009998
ISC/EB-prol	LOC5573744	AAEL019937	Down	-0.255026	0.0535528	0.000237776
ISC/EB-prol	LOC5573744	AAEL019937	Down	-0.255026	0.0535528	0.000237776
ISC/EB-prol	LOC5568089	AAEL006519	Down	-0.257005	0.114665	0.0361928
ISC/EB-prol	LOC5568089	AAEL006519	Down	-0.257005	0.114665	0.0361928
ISC/EB-prol	LOC5579810	AAEL005515	Down	-0.257326	0.0292499	2.48333e-05
ISC/EB-prol	LOC5579810	AAEL005515	Down	-0.257326	0.0292499	2.48e-05
ISC/EB-prol	LOC5578562	AAEL019589	Down	-0.257639	0.118292	0.0383923
ISC/EB-prol	LOC5578562	AAEL019589	Down	-0.257639	0.118292	0.0383923
ISC/EB-prol	LOC5580010	AAEL009637	Down	-0.257931	0.0577088	0.000700631
ISC/EB-prol	LOC5580010	AAEL009637	Down	-0.257931	0.0577088	0.000700631
ISC/EB-prol	LOC5564916	AAEL014657	Down	-0.260262	0.0879644	0.00619876
ISC/EB-prol	LOC5564916	AAEL014657	Down	-0.260262	0.0879644	0.00619876
ISC/EB-prol	LOC5571449	AAEL009085	Down	-0.261083	0.095196	0.00939812
ISC/EB-prol	LOC5571449	AAEL009085	Down	-0.261083	0.095196	0.00939812
ISC/EB-prol	LOC5578796	AAEL003675	Down	-0.261784	0.0451612	2.45e-05
ISC/EB-prol	LOC5578796	AAEL003675	Down	-0.261784	0.0451612	2.45061e-05
ISC/EB-prol	LOC5566651	AAEL005500	Down	-0.261913	0.124105	0.0477904
ISC/EB-prol	LOC5566651	AAEL005500	Down	-0.261913	0.124105	0.0477904
ISC/EB-prol	LOC23687839	AAEL017419	Down	-0.262377	0.0338892	5.58e-05
ISC/EB-prol	LOC23687839	AAEL017419	Down	-0.262377	0.0338892	5.58172e-05
ISC/EB-prol	LOC110679507	AAEL025552	Down	-0.262696	0.0970633	0.0111978
ISC/EB-prol	LOC110679507	AAEL025552	Down	-0.262696	0.0970633	0.0111978
ISC/EB-prol	LOC5563644	AAEL000077	Down	-0.262705	0.118414	0.0289942
ISC/EB-prol	LOC5563644	AAEL000077	Down	-0.262705	0.118414	0.0289942
ISC/EB-prol	LOC5576327	AAEL000406	Down	-0.26316	0.121735	0.0331934
ISC/EB-prol	LOC5576327	AAEL000406	Down	-0.26316	0.121735	0.0331934
ISC/EB-prol	LOC5574240	AAEL011007	Down	-0.263261	0.0645514	0.00128842
ISC/EB-prol	LOC5574240	AAEL011007	Down	-0.263261	0.0645514	0.00128842
ISC/EB-prol	LOC5569496	AAEL007682	Down	-0.264771	0.105889	0.0143971
ISC/EB-prol	LOC5569496	AAEL007682	Down	-0.264771	0.105889	0.0143971
ISC/EB-prol	LOC5577407	AAEL003161	Down	-0.265625	0.0655205	0.0012084
ISC/EB-prol	LOC5577407	AAEL003161	Down	-0.265625	0.0655205	0.00120839
ISC/EB-prol	LOC5572650	AAEL001865	Down	-0.265627	0.0813852	0.00239952
ISC/EB-prol	LOC5572650	AAEL001865	Down	-0.265627	0.0813852	0.00239952
ISC/EB-prol	LOC23687536	AAEL017116	Down	-0.266112	0.0459402	0.000237118
ISC/EB-prol	LOC23687536	AAEL017116	Down	-0.266112	0.0459402	0.000237118
ISC/EB-prol	LOC5579840	AAEL005843	Down	-0.266205	0.0805277	0.00364053
ISC/EB-prol	LOC5579840	AAEL005843	Down	-0.266205	0.0805277	0.00364053
ISC/EB-prol	LOC5579075	AAEL019426	Down	-0.266708	0.112781	0.0243951
ISC/EB-prol	LOC5579075	AAEL019426	Down	-0.266708	0.112781	0.0243951
ISC/EB-prol	LOC5573238	AAEL010330	Down	-0.267312	0.104431	0.0123975
ISC/EB-prol	LOC5573238	AAEL010330	Down	-0.267312	0.104431	0.0123975
ISC/EB-prol	LOC5576069	AAEL026118	Down	-0.267357	0.0915371	0.0059988
ISC/EB-prol	LOC5576069	AAEL026118	Down	-0.267357	0.0915371	0.0059988
ISC/EB-prol	LOC5579113	AAEL003817	Down	-0.268467	0.0946225	0.010198
ISC/EB-prol	LOC5579113	AAEL003817	Down	-0.268467	0.0946225	0.010198
ISC/EB-prol	LOC5573942	AAEL019793	Down	-0.2689	0.101796	0.0129974
ISC/EB-prol	LOC5573942	AAEL019793	Down	-0.2689	0.101796	0.0129974
ISC/EB-prol	LOC5578311	AAEL008084	Down	-0.271986	0.086242	0.0029994
ISC/EB-prol	LOC5578311	AAEL008084	Down	-0.271986	0.086242	0.0029994
ISC/EB-prol	LOC5574816	AAEL002464	Down	-0.272939	0.0689422	0.000680304
ISC/EB-prol	LOC5574816	AAEL002464	Down	-0.272939	0.0689422	0.000680304
ISC/EB-prol	LOC5578301	AAEL013620	Down	-0.273811	0.0880366	0.00279944
ISC/EB-prol	LOC5578301	AAEL013620	Down	-0.273811	0.0880366	0.00279944
ISC/EB-prol	LOC110679868	AAEL027050	Down	-0.274509	0.0700824	0.00100959
ISC/EB-prol	LOC110679868	AAEL027050	Down	-0.274509	0.0700824	0.00100959
ISC/EB-prol	LOC5572791	AAEL001896	Down	-0.275067	0.068071	0.000777833
ISC/EB-prol	LOC5572791	AAEL001896	Down	-0.275067	0.068071	0.000777833
ISC/EB-prol	LOC23687857	AAEL017437	Down	-0.275838	0.0839046	0.00279944
ISC/EB-prol	LOC23687857	AAEL017437	Down	-0.275838	0.0839046	0.00279944
ISC/EB-prol	LOC5578368	AAEL003530	Down	-0.277432	0.012719	3.23057e-07
ISC/EB-prol	LOC5578368	AAEL003530	Down	-0.277432	0.012719	3.23e-07
ISC/EB-prol	LOC5579101	AAEL003842	Down	-0.277525	0.0783838	0.00182902
ISC/EB-prol	LOC5579101	AAEL003842	Down	-0.277525	0.0783838	0.00182903
ISC/EB-prol	LOC5574244	-	Down	-0.277601	0.102644	0.0089982
[truncated: 21,179 more rows]

## Sheet: cxtribl_vs_cxtri(ctrl)
cluster	gene	NCBI/VectorBase ID of Ae. aegypti orthologs	Regulation	de_coef	de_se	de_pval
ISC/EB-1	Ctri02427	LOC110674148|-	Up	1.51528	0.0673463	3.71869e-06
ISC/EB-1	Ctri02427	LOC110674148|-	Up	1.51528	0.0673463	3.71869e-06
ISC/EB-1	Ctri02429		Up	1.38221	0.066275	8.96756e-06
ISC/EB-1	Ctri02429		Up	1.38221	0.066275	8.96756e-06
ISC/EB-1	Ctri09598		Up	1.37242	0.0515371	3.96426e-06
ISC/EB-1	Ctri09598		Up	1.37242	0.0515371	3.96426e-06
ISC/EB-1	Ctri09605		Up	1.27487	0.110059	1.98234e-06
ISC/EB-1	Ctri09605		Up	1.27487	0.110059	1.98234e-06
ISC/EB-1	Ctri05970	LOC5580247|AAEL012545	Up	1.26429	0.164775	0.000200367
ISC/EB-1	Ctri05970	LOC5580247|AAEL012545	Up	1.26429	0.164775	0.000200367
ISC/EB-1	Ctri08949	LOC5566344|AAEL020936	Up	1.24525	0.168434	0.000103667
ISC/EB-1	Ctri08949	LOC5566344|AAEL020936	Up	1.24525	0.168434	0.000103667
ISC/EB-1	Ctri09596		Up	1.07906	0.0497654	0.000131681
ISC/EB-1	Ctri09596		Up	1.07906	0.0497654	0.000131681
ISC/EB-1	Ctri09597		Up	1.06431	0.0463035	2.03881e-07
ISC/EB-1	Ctri09597		Up	1.06431	0.0463035	2.03881e-07
ISC/EB-1	Ctri09601		Up	1.01567	0.0534534	1.70055e-06
ISC/EB-1	Ctri09601		Up	1.01567	0.0534534	1.70055e-06
ISC/EB-1	Ctri11814	LOC5567383|AAEL006061	Up	1.01393	0.0924656	6.60313e-05
ISC/EB-1	Ctri11814	LOC5567383|AAEL006061	Up	1.01393	0.0924656	6.60313e-05
ISC/EB-1	Ctri04506		Up	1.0098	0.176655	0.000206262
ISC/EB-1	Ctri04506		Up	1.0098	0.176655	0.000206262
ISC/EB-1	Ctri12122	LOC5575395|AAEL011803	Up	1.0074	0.0952631	4.5471e-05
ISC/EB-1	Ctri12122	LOC5575395|AAEL011803	Up	1.0074	0.0952631	4.5471e-05
ISC/EB-1	Ctri08284	LOC5563689|AAEL000551	Up	1.00235	0.139334	0.000138076
ISC/EB-1	Ctri08284	LOC5563689|AAEL000551	Up	1.00235	0.139334	0.000138076
ISC/EB-1	Ctri05230	LOC110676888|-	Up	0.967719	0.134818	0.000140176
ISC/EB-1	Ctri05230	LOC110676888|-	Up	0.967719	0.134818	0.000140176
ISC/EB-1	Ctri09543		Up	0.964291	0.181826	0.000201038
ISC/EB-1	Ctri09543		Up	0.964291	0.181826	0.000201038
ISC/EB-1	Ctri06889	LOC5576221|AAEL002833	Up	0.959382	0.0564524	1.29233e-05
ISC/EB-1	Ctri06889	LOC5576221|AAEL002833	Up	0.959382	0.0564524	1.29233e-05
ISC/EB-1	Ctri06608	LOC5571011|AAEL008736	Up	0.941055	0.0863712	1.78481e-05
ISC/EB-1	Ctri06608	LOC5571011|AAEL008736	Up	0.941055	0.0863712	1.78481e-05
ISC/EB-1	Ctri11515	LOC5569091|AAEL007355	Up	0.93153	0.135926	0.000218898
ISC/EB-1	Ctri11515	LOC5569091|AAEL007355	Up	0.93153	0.135926	0.000218898
ISC/EB-1	Ctri10202	LOC5570871|AAEL019868	Up	0.921155	0.116593	5.65616e-05
ISC/EB-1	Ctri10202	LOC5570871|AAEL019868	Up	0.921155	0.116593	5.65616e-05
ISC/EB-1	Ctri05590		Up	0.920074	0.130552	0.000108482
ISC/EB-1	Ctri05590		Up	0.920074	0.130552	0.000108482
ISC/EB-1	Ctri11457		Up	0.902656	0.148539	0.000119694
ISC/EB-1	Ctri11457		Up	0.902656	0.148539	0.000119694
ISC/EB-1	Ctri08956	LOC5564627|AAEL025567	Up	0.896697	0.0889626	2.96018e-05
ISC/EB-1	Ctri08956	LOC5564627|AAEL025567	Up	0.896697	0.0889626	2.96018e-05
ISC/EB-1	Ctri09603	LOC5577712|-	Up	0.894659	0.0416535	2.09528e-06
ISC/EB-1	Ctri09603	LOC5577712|-	Up	0.894659	0.0416535	2.09528e-06
ISC/EB-1	Ctri09520		Up	0.881232	0.0466296	5.65873e-07
ISC/EB-1	Ctri09520		Up	0.881232	0.0466296	5.65873e-07
ISC/EB-1	Ctri09604		Up	0.877956	0.0532677	5.21735e-06
ISC/EB-1	Ctri09604		Up	0.877956	0.0532677	5.21735e-06
ISC/EB-1	Ctri11557	LOC110681134|-	Up	0.870749	0.105494	0.00015222
ISC/EB-1	Ctri11557	LOC110681134|-	Up	0.870749	0.105494	0.00015222
ISC/EB-1	Ctri10803	LOC5571397|AAEL009029	Up	0.86595	0.136104	0.000323517
ISC/EB-1	Ctri10803	LOC5571397|AAEL009029	Up	0.86595	0.136104	0.000323517
ISC/EB-1	Ctri09600		Up	0.857184	0.0414032	1.96378e-07
ISC/EB-1	Ctri09600		Up	0.857184	0.0414032	1.96378e-07
ISC/EB-1	Ctri00166	LOC5571386|AAEL009017	Up	0.846685	0.122951	0.000221837
ISC/EB-1	Ctri00166	LOC5571386|AAEL009017	Up	0.846685	0.122951	0.000221837
ISC/EB-1	Ctri03701	LOC5564525|AAEL014492	Up	0.845263	0.14267	0.000458004
ISC/EB-1	Ctri03701	LOC5564525|AAEL014492	Up	0.845263	0.14267	0.000458004
ISC/EB-1	Ctri10274	LOC110675796|-	Up	0.829898	0.138161	0.000308752
ISC/EB-1	Ctri10274	LOC110675796|-	Up	0.829898	0.138161	0.000308752
ISC/EB-1	Ctri04803	LOC5570821|AAEL008594	Up	0.808924	0.140172	0.000208697
ISC/EB-1	Ctri04803	LOC5570821|AAEL008594	Up	0.808924	0.140172	0.000208697
ISC/EB-1	Ctri09946	LOC5577893|AAEL013407	Up	0.805665	0.0718684	0.000508196
ISC/EB-1	Ctri09946	LOC5577893|AAEL013407	Up	0.805665	0.0718684	0.000508196
ISC/EB-1	Ctri07610	LOC5568716|AAEL007049	Up	0.802841	0.132438	0.000112774
ISC/EB-1	Ctri07610	LOC5568716|AAEL007049	Up	0.802841	0.132438	0.000112774
ISC/EB-1	Ctri01628	LOC5578147|AAEL013528	Up	0.801753	0.116185	0.000108244
ISC/EB-1	Ctri01628	LOC5578147|AAEL013528	Up	0.801753	0.116185	0.000108244
ISC/EB-1	Ctri06009		Up	0.792871	0.133862	0.00043006
ISC/EB-1	Ctri06009		Up	0.792871	0.133862	0.00043006
ISC/EB-1	Ctri06076	LOC5571755|AAEL009278	Up	0.790182	0.146689	0.000365107
ISC/EB-1	Ctri06076	LOC5571755|AAEL009278	Up	0.790182	0.146689	0.000365107
ISC/EB-1	Ctri10603	LOC5567118|AAEL015304	Up	0.784435	0.125477	0.000173351
ISC/EB-1	Ctri10603	LOC5567118|AAEL015304	Up	0.784435	0.125477	0.000173351
ISC/EB-1	Ctri12743	LOC5568553|AAEL001109	Up	0.784255	0.128278	0.000222276
ISC/EB-1	Ctri12743	LOC5568553|AAEL001109	Up	0.784255	0.128278	0.000222276
ISC/EB-1	Ctri05712	LOC5564545|AAEL004308	Up	0.783106	0.105095	0.000127898
ISC/EB-1	Ctri05712	LOC5564545|AAEL004308	Up	0.783106	0.105095	0.000127898
ISC/EB-1	Ctri04097		Up	0.783049	0.057652	1.97472e-05
ISC/EB-1	Ctri04097		Up	0.783049	0.057652	1.97472e-05
ISC/EB-1	Ctri06740	LOC5568387|AAEL006771	Up	0.782761	0.1068	5.20783e-05
ISC/EB-1	Ctri06740	LOC5568387|AAEL006771	Up	0.782761	0.1068	5.20783e-05
ISC/EB-1	Ctri08331	LOC5564133|AAEL004088	Up	0.782321	0.051616	7.61892e-08
ISC/EB-1	Ctri08331	LOC5564133|AAEL004088	Up	0.782321	0.051616	7.61892e-08
ISC/EB-1	Ctri04785	LOC5580320|AAEL019791	Up	0.77984	0.134633	0.000313244
ISC/EB-1	Ctri04785	LOC5580320|AAEL019791	Up	0.77984	0.134633	0.000313244
ISC/EB-1	Ctri07185		Up	0.7711	0.187077	0.000461008
ISC/EB-1	Ctri07185		Up	0.7711	0.187077	0.000461008
ISC/EB-1	Ctri05992		Up	0.763124	0.14251	9.37825e-05
ISC/EB-1	Ctri05992		Up	0.763124	0.14251	9.37825e-05
ISC/EB-1	Ctri05065	LOC5574484|AAEL002401	Up	0.762563	0.0689065	4.66673e-05
ISC/EB-1	Ctri05065	LOC5574484|AAEL002401	Up	0.762563	0.0689065	4.66673e-05
ISC/EB-1	Ctri06719	LOC23687932|AAEL017512	Up	0.760245	0.101318	5.77177e-05
ISC/EB-1	Ctri06719	LOC23687932|AAEL017512	Up	0.760245	0.101318	5.77177e-05
ISC/EB-1	Ctri00837	LOC5576685|AAEL012710	Up	0.759066	0.120383	9.87833e-05
ISC/EB-1	Ctri00837	LOC5576685|AAEL012710	Up	0.759066	0.120383	9.87833e-05
ISC/EB-1	Ctri10688	LOC5572867|AAEL010087	Up	0.748359	0.0887963	5.081e-05
ISC/EB-1	Ctri10688	LOC5572867|AAEL010087	Up	0.748359	0.0887963	5.081e-05
ISC/EB-1	Ctri11561		Up	0.747092	0.10539	0.000148262
ISC/EB-1	Ctri11561		Up	0.747092	0.10539	0.000148262
ISC/EB-1	Ctri10613	LOC5566028|AAEL005127	Up	0.744798	0.190693	0.0014105
ISC/EB-1	Ctri10613	LOC5566028|AAEL005127	Up	0.744798	0.190693	0.0014105
ISC/EB-1	Ctri06123	LOC5572853|AAEL010071	Up	0.743097	0.123997	0.00016578
ISC/EB-1	Ctri06123	LOC5572853|AAEL010071	Up	0.743097	0.123997	0.00016578
ISC/EB-1	Ctri00344	LOC5574522|AAEL011198	Up	0.738076	0.142535	0.000454127
ISC/EB-1	Ctri00344	LOC5574522|AAEL011198	Up	0.738076	0.142535	0.000454127
ISC/EB-1	Ctri09599	LOC5577713|-	Up	0.733582	0.0358002	0.000120531
ISC/EB-1	Ctri09599	LOC5577713|-	Up	0.733582	0.0358002	0.000120531
ISC/EB-1	Ctri00519	LOC5574995|AAEL002523	Up	0.729043	0.0873682	5.0792e-05
ISC/EB-1	Ctri00519	LOC5574995|AAEL002523	Up	0.729043	0.0873682	5.0792e-05
ISC/EB-1	Ctri03777	LOC110677006|AAEL020192	Up	0.72561	0.175008	0.000832039
ISC/EB-1	Ctri03777	LOC110677006|AAEL020192	Up	0.72561	0.175008	0.000832039
ISC/EB-1	Ctri01355	LOC110681364|AAEL026177	Up	0.725556	0.122823	0.000151048
ISC/EB-1	Ctri01355	LOC110681364|AAEL026177	Up	0.725556	0.122823	0.000151048
ISC/EB-1	Ctri06077	LOC5564782|AAEL004427	Up	0.725294	0.109886	0.000320813
ISC/EB-1	Ctri06077	LOC5564782|AAEL004427	Up	0.725294	0.109886	0.000320813
ISC/EB-1	Ctri05472	LOC5580326|AAEL013072	Up	0.724921	0.265753	0.0069986
ISC/EB-1	Ctri05472	LOC5580326|AAEL013072	Up	0.724921	0.265753	0.0069986
ISC/EB-1	Ctri05623	LOC5569310|AAEL007549	Up	0.720222	0.0629538	2.72471e-05
ISC/EB-1	Ctri05623	LOC5569310|AAEL007549	Up	0.720222	0.0629538	2.72471e-05
ISC/EB-1	Ctri07890	LOC5567465|AAEL000942	Up	0.718608	0.144912	0.00019315
ISC/EB-1	Ctri07890	LOC5567465|AAEL000942	Up	0.718608	0.144912	0.00019315
ISC/EB-1	Ctri06876	LOC5563904|AAEL003993	Up	0.715911	0.0700583	6.41195e-06
ISC/EB-1	Ctri06876	LOC5563904|AAEL003993	Up	0.715911	0.0700583	6.41195e-06
ISC/EB-1	Ctri02349	LOC5567075|AAEL005799	Up	0.712442	0.136408	0.000296692
ISC/EB-1	Ctri02349	LOC5567075|AAEL005799	Up	0.712442	0.136408	0.000296692
ISC/EB-1	Ctri04488	LOC5573098|AAEL023632	Up	0.704948	0.102259	0.000139652
ISC/EB-1	Ctri04488	LOC5573098|AAEL023632	Up	0.704948	0.102259	0.000139652
ISC/EB-1	Ctri02999	LOC110674163|AAEL022901	Up	0.697158	0.100769	0.000218271
ISC/EB-1	Ctri02999	LOC110674163|AAEL022901	Up	0.697158	0.100769	0.000218271
ISC/EB-1	Ctri03007	LOC110681130|AAEL020987	Up	0.696531	0.0993735	0.000187844
ISC/EB-1	Ctri03007	LOC110681130|AAEL020987	Up	0.696531	0.0993735	0.000187844
ISC/EB-1	Ctri10795		Up	0.690283	0.128336	0.000437656
ISC/EB-1	Ctri10795		Up	0.690283	0.128336	0.000437656
ISC/EB-1	Ctri09881	LOC5574862|AAEL011468	Up	0.686621	0.0596102	1.43054e-05
ISC/EB-1	Ctri09881	LOC5574862|AAEL011468	Up	0.686621	0.0596102	1.43054e-05
ISC/EB-1	Ctri05181	LOC5564672|AAEL014556	Up	0.681431	0.0801275	9.48224e-05
ISC/EB-1	Ctri05181	LOC5564672|AAEL014556	Up	0.681431	0.0801275	9.48224e-05
ISC/EB-1	Ctri09159	LOC110681189|-	Up	0.67798	0.101294	0.000232233
ISC/EB-1	Ctri09159	LOC110681189|-	Up	0.67798	0.101294	0.000232233
ISC/EB-1	Ctri11471	LOC5576100|AAEL002789	Up	0.674509	0.131677	0.000213317
ISC/EB-1	Ctri11471	LOC5576100|AAEL002789	Up	0.674509	0.131677	0.000213317
ISC/EB-1	Ctri03543	LOC5568087|AAEL006521	Up	0.672922	0.107402	0.000244365
ISC/EB-1	Ctri03543	LOC5568087|AAEL006521	Up	0.672922	0.107402	0.000244365
ISC/EB-1	Ctri01506	LOC5566751|AAEL015238	Up	0.671681	0.114245	0.000203648
ISC/EB-1	Ctri01506	LOC5566751|AAEL015238	Up	0.671681	0.114245	0.000203648
ISC/EB-1	Ctri04385	LOC5572372|AAEL009760	Up	0.669229	0.0898571	0.000184057
ISC/EB-1	Ctri04385	LOC5572372|AAEL009760	Up	0.669229	0.0898571	0.000184057
ISC/EB-1	Ctri10269	LOC5571045|AAEL008770	Up	0.664894	0.0883953	0.000115355
ISC/EB-1	Ctri10269	LOC5571045|AAEL008770	Up	0.664894	0.0883953	0.000115355
ISC/EB-1	Ctri01128	LOC5564392|AAEL004234	Up	0.661804	0.0795682	6.62585e-05
ISC/EB-1	Ctri01128	LOC5564392|AAEL004234	Up	0.661804	0.0795682	6.62585e-05
ISC/EB-1	Ctri06216	LOC5579833|AAEL005866	Up	0.661277	0.11142	0.000296159
ISC/EB-1	Ctri06216	LOC5579833|AAEL005866	Up	0.661277	0.11142	0.000296159
ISC/EB-1	Ctri07479	LOC5575696|AAEL012010	Up	0.660765	0.120106	0.000267385
ISC/EB-1	Ctri07479	LOC5575696|AAEL012010	Up	0.660765	0.120106	0.000267385
ISC/EB-1	Ctri00810		Up	0.654785	0.155268	0.000886566
ISC/EB-1	Ctri00810		Up	0.654785	0.155268	0.000886566
ISC/EB-1	Ctri05302	LOC5572929|AAEL010148	Up	0.654092	0.115041	0.000240061
ISC/EB-1	Ctri05302	LOC5572929|AAEL010148	Up	0.654092	0.115041	0.000240061
ISC/EB-1	Ctri02103	LOC5578941|AAEL003769	Up	0.652543	0.126132	0.000715354
ISC/EB-1	Ctri02103	LOC5578941|AAEL003769	Up	0.652543	0.126132	0.000715354
ISC/EB-1	Ctri11704	LOC110678485|-	Up	0.652191	0.136581	0.000521826
ISC/EB-1	Ctri11704	LOC110678485|-	Up	0.652191	0.136581	0.000521826
ISC/EB-1	Ctri05831	LOC5564976|AAEL004532	Up	0.647752	0.0912182	0.000111999
ISC/EB-1	Ctri05831	LOC5564976|AAEL004532	Up	0.647752	0.0912182	0.000111999
ISC/EB-1	Ctri06877	LOC110681033|-	Up	0.632882	0.0802505	0.000904509
ISC/EB-1	Ctri06877	LOC110681033|-	Up	0.632882	0.0802505	0.000904509
ISC/EB-1	Ctri10571	LOC5574159|AAEL010966	Up	0.631287	0.139528	0.000605117
ISC/EB-1	Ctri10571	LOC5574159|AAEL010966	Up	0.631287	0.139528	0.000605117
ISC/EB-1	Ctri06179	LOC5570052|AAEL000210	Up	0.630675	0.132886	0.000670897
ISC/EB-1	Ctri06179	LOC5570052|AAEL000210	Up	0.630675	0.132886	0.000670897
ISC/EB-1	Ctri09757	LOC5565405|AAEL014843	Up	0.629044	0.0412364	2.9986e-06
ISC/EB-1	Ctri09757	LOC5565405|AAEL014843	Up	0.629044	0.0412364	2.9986e-06
ISC/EB-1	Ctri09218		Up	0.627691	0.127779	0.000381818
ISC/EB-1	Ctri09218		Up	0.627691	0.127779	0.000381818
ISC/EB-1	Ctri01623	LOC5564058|AAEL004069	Up	0.627333	0.100888	0.000144153
ISC/EB-1	Ctri01623	LOC5564058|AAEL004069	Up	0.627333	0.100888	0.000144153
ISC/EB-1	Ctri07557	LOC5574468|-	Up	0.623716	0.0581519	4.92757e-05
ISC/EB-1	Ctri07557	LOC5574468|-	Up	0.623716	0.0581519	4.92757e-05
ISC/EB-1	Ctri09576	LOC5572748|AAEL010032	Up	0.623028	0.0695633	5.56905e-05
ISC/EB-1	Ctri09576	LOC5572748|AAEL010032	Up	0.623028	0.0695633	5.56905e-05
ISC/EB-1	Ctri11330	LOC5572966|AAEL010181	Up	0.619978	0.157147	0.0011974
ISC/EB-1	Ctri11330	LOC5572966|AAEL010181	Up	0.619978	0.157147	0.0011974
ISC/EB-1	Ctri07188		Up	0.618398	0.148733	0.00131956
ISC/EB-1	Ctri07188		Up	0.618398	0.148733	0.00131956
ISC/EB-1	Ctri07026	LOC5575082|AAEL011627	Up	0.618367	0.13932	0.000545958
ISC/EB-1	Ctri07026	LOC5575082|AAEL011627	Up	0.618367	0.13932	0.000545958
ISC/EB-1	Ctri02257	LOC5580100|AAEL002140	Up	0.617419	0.102833	0.000100379
ISC/EB-1	Ctri02257	LOC5580100|AAEL002140	Up	0.617419	0.102833	0.000100379
ISC/EB-1	Ctri09412	LOC5564517|AAEL004291	Up	0.617186	0.132725	0.000377421
ISC/EB-1	Ctri09412	LOC5564517|AAEL004291	Up	0.617186	0.132725	0.000377421
ISC/EB-1	Ctri04645		Up	0.61632	0.145901	0.000592696
ISC/EB-1	Ctri04645		Up	0.61632	0.145901	0.000592696
ISC/EB-1	Ctri09271	LOC23687581|AAEL017161	Up	0.613719	0.100863	0.000185384
ISC/EB-1	Ctri09271	LOC23687581|AAEL017161	Up	0.613719	0.100863	0.000185384
ISC/EB-1	Ctri06640	LOC5573061|AAEL010245	Up	0.613443	0.136376	0.000701156
ISC/EB-1	Ctri06640	LOC5573061|AAEL010245	Up	0.613443	0.136376	0.000701156
ISC/EB-1	Ctri00067	LOC5574746|AAEL011381	Up	0.612569	0.0971846	0.000121213
ISC/EB-1	Ctri00067	LOC5574746|AAEL011381	Up	0.612569	0.0971846	0.000121213
ISC/EB-1	Ctri01325	LOC5570587|AAEL008397	Up	0.608814	0.120695	0.000351477
ISC/EB-1	Ctri01325	LOC5570587|AAEL008397	Up	0.608814	0.120695	0.000351477
ISC/EB-1	Ctri04136	LOC5570443|AAEL008336	Up	0.608781	0.0719772	4.46164e-05
ISC/EB-1	Ctri04136	LOC5570443|AAEL008336	Up	0.608781	0.0719772	4.46164e-05
ISC/EB-1	Ctri05781	LOC5574494|AAEL002377	Up	0.607582	0.0985948	0.000160827
ISC/EB-1	Ctri05781	LOC5574494|AAEL002377	Up	0.607582	0.0985948	0.000160827
ISC/EB-1	Ctri04461	LOC5573510|AAEL010546	Up	0.60758	0.0989246	0.000185009
ISC/EB-1	Ctri04461	LOC5573510|AAEL010546	Up	0.60758	0.0989246	0.000185009
ISC/EB-1	Ctri08090	LOC5566055|AAEL005150	Up	0.605221	0.141404	0.00052004
ISC/EB-1	Ctri08090	LOC5566055|AAEL005150	Up	0.605221	0.141404	0.00052004
ISC/EB-1	Ctri05468	LOC23687502|AAEL017082	Up	0.602601	0.0753885	0.00016297
ISC/EB-1	Ctri05468	LOC23687502|AAEL017082	Up	0.602601	0.0753885	0.00016297
ISC/EB-1	Ctri08969		Up	0.60222	0.125378	0.000400713
ISC/EB-1	Ctri08969		Up	0.60222	0.125378	0.000400713
ISC/EB-1	Ctri11521	LOC5569088|AAEL007363	Up	0.60056	0.140042	0.000642137
ISC/EB-1	Ctri11521	LOC5569088|AAEL007363	Up	0.60056	0.140042	0.000642137
ISC/EB-1	Ctri01218	LOC5570455|AAEL008341	Up	0.600209	0.0527563	4.43435e-05
ISC/EB-1	Ctri01218	LOC5570455|AAEL008341	Up	0.600209	0.0527563	4.43435e-05
ISC/EB-1	Ctri06628	LOC5577483|AAEL013236	Up	0.599296	0.0973299	0.000281474
ISC/EB-1	Ctri06628	LOC5577483|AAEL013236	Up	0.599296	0.0973299	0.000281474
ISC/EB-1	Ctri09114	LOC5574519|AAEL011192	Up	0.598608	0.130726	0.00040299
ISC/EB-1	Ctri09114	LOC5574519|AAEL011192	Up	0.598608	0.130726	0.00040299
ISC/EB-1	Ctri07883	LOC110681389|-	Up	0.594668	0.0670744	0.000124773
ISC/EB-1	Ctri07883	LOC110681389|-	Up	0.594668	0.0670744	0.000124773
ISC/EB-1	Ctri12101	LOC5577687|AAEL013320	Up	0.594395	0.0721086	1.81936e-05
ISC/EB-1	Ctri12101	LOC5577687|AAEL013320	Up	0.594395	0.0721086	1.81936e-05
ISC/EB-1	Ctri08191	LOC5574180|AAEL002304	Up	0.591222	0.101662	0.000110304
ISC/EB-1	Ctri08191	LOC5574180|AAEL002304	Up	0.591222	0.101662	0.000110304
ISC/EB-1	Ctri00887	LOC5569556|AAEL007760	Up	0.589238	0.117704	0.000429644
ISC/EB-1	Ctri00887	LOC5569556|AAEL007760	Up	0.589238	0.117704	0.000429644
ISC/EB-1	Ctri10406	LOC5569898|AAEL008002	Up	0.588905	0.0711032	0.000150214
ISC/EB-1	Ctri10406	LOC5569898|AAEL008002	Up	0.588905	0.0711032	0.000150214
ISC/EB-1	Ctri04159	LOC5567996|AAEL006441	Up	0.58885	0.0819619	5.54172e-05
ISC/EB-1	Ctri04159	LOC5567996|AAEL006441	Up	0.58885	0.0819619	5.54172e-05
ISC/EB-1	Ctri05456	LOC5569181|AAEL007441	Up	0.588019	0.139585	0.000799914
ISC/EB-1	Ctri05456	LOC5569181|AAEL007441	Up	0.588019	0.139585	0.000799914
ISC/EB-1	Ctri05380	LOC5566513|AAEL005446	Up	0.584969	0.153072	0.00145914
ISC/EB-1	Ctri05380	LOC5566513|AAEL005446	Up	0.584969	0.153072	0.00145914
ISC/EB-1	Ctri02218	LOC5572600|AAEL009911	Up	0.582156	0.142761	0.000914983
ISC/EB-1	Ctri02218	LOC5572600|AAEL009911	Up	0.582156	0.142761	0.000914983
ISC/EB-1	Ctri01202		Up	0.582005	0.168216	0.00223402
ISC/EB-1	Ctri01202		Up	0.582005	0.168216	0.00223402
ISC/EB-1	Ctri01690	LOC5571500|AAEL001623	Up	0.581166	0.0623597	1.64638e-05
ISC/EB-1	Ctri01690	LOC5571500|AAEL001623	Up	0.581166	0.0623597	1.64638e-05
ISC/EB-1	Ctri07427	LOC5565805|AAEL019932	Up	0.580532	0.129422	0.000861412
ISC/EB-1	Ctri07427	LOC5565805|AAEL019932	Up	0.580532	0.129422	0.000861412
ISC/EB-1	Ctri04443	LOC110680580|-	Up	0.579429	0.109114	0.000332419
ISC/EB-1	Ctri04443	LOC110680580|-	Up	0.579429	0.109114	0.000332419
ISC/EB-1	Ctri05266	LOC5567314|AAEL005968	Up	0.572503	0.147971	0.000772043
ISC/EB-1	Ctri05266	LOC5567314|AAEL005968	Up	0.572503	0.147971	0.000772043
ISC/EB-1	Ctri00271	LOC5579822|AAEL005521	Up	0.572121	0.0853874	4.30126e-05
ISC/EB-1	Ctri00271	LOC5579822|AAEL005521	Up	0.572121	0.0853874	4.30126e-05
ISC/EB-1	Ctri02384	LOC5575640|AAEL011972	Up	0.570365	0.0867532	0.000172459
ISC/EB-1	Ctri02384	LOC5575640|AAEL011972	Up	0.570365	0.0867532	0.000172459
ISC/EB-1	Ctri11304	LOC5568219|AAEL006661	Up	0.566466	0.125365	0.000679583
ISC/EB-1	Ctri11304	LOC5568219|AAEL006661	Up	0.566466	0.125365	0.000679583
ISC/EB-1	Ctri03878	LOC5565851|AAEL005022	Up	0.564942	0.115722	0.000348033
ISC/EB-1	Ctri03878	LOC5565851|AAEL005022	Up	0.564942	0.115722	0.000348033
ISC/EB-1	Ctri11818	LOC5567396|AAEL006053	Up	0.563572	0.113353	0.000529619
ISC/EB-1	Ctri11818	LOC5567396|AAEL006053	Up	0.563572	0.113353	0.000529619
ISC/EB-1	Ctri08600	LOC5568112|AAEL006566	Up	0.561901	0.141951	0.00112798
ISC/EB-1	Ctri08600	LOC5568112|AAEL006566	Up	0.561901	0.141951	0.00112798
ISC/EB-1	Ctri11506	LOC5575781|AAEL002703	Up	0.56176	0.120615	0.000358706
ISC/EB-1	Ctri11506	LOC5575781|AAEL002703	Up	0.56176	0.120615	0.000358706
ISC/EB-1	mt_ND2		Up	0.561514	0.0477581	1.66923e-05
ISC/EB-1	mt_ND2		Up	0.561514	0.0477581	1.66923e-05
ISC/EB-1	Ctri02548	LOC5571785|AAEL009313	Up	0.559632	0.0618283	1.03625e-05
ISC/EB-1	Ctri02548	LOC5571785|AAEL009313	Up	0.559632	0.0618283	1.03625e-05
ISC/EB-1	Ctri03445	LOC23687632|AAEL017212	Up	0.559482	0.0640807	3.95961e-05
ISC/EB-1	Ctri03445	LOC23687632|AAEL017212	Up	0.559482	0.0640807	3.95961e-05
ISC/EB-1	Ctri08597	LOC5568113|AAEL006557	Up	0.558324	0.108979	0.000158625
ISC/EB-1	Ctri08597	LOC5568113|AAEL006557	Up	0.558324	0.108979	0.000158625
ISC/EB-1	Ctri09602	LOC5573687|-	Up	0.557029	0.0338504	0.00013142
ISC/EB-1	Ctri09602	LOC5573687|-	Up	0.557029	0.0338504	0.00013142
ISC/EB-1	Ctri10244	LOC5564225|AAEL023037	Up	0.556744	0.0787272	0.000151237
ISC/EB-1	Ctri10244	LOC5564225|AAEL023037	Up	0.556744	0.0787272	0.000151237
ISC/EB-1	Ctri04990	LOC5569864|AAEL007944	Up	0.55456	0.0871765	0.000104266
ISC/EB-1	Ctri04990	LOC5569864|AAEL007944	Up	0.55456	0.0871765	0.000104266
ISC/EB-1	Ctri00417	LOC5565679|AAEL021676	Up	0.551216	0.146026	0.00125825
ISC/EB-1	Ctri00417	LOC5565679|AAEL021676	Up	0.551216	0.146026	0.00125825
ISC/EB-1	Ctri07140	LOC5568428|AAEL006836	Up	0.550422	0.115316	0.000468817
ISC/EB-1	Ctri07140	LOC5568428|AAEL006836	Up	0.550422	0.115316	0.000468817
ISC/EB-1	Ctri02723	LOC5577591|AAEL020476	Up	0.549087	0.1199	0.000726793
ISC/EB-1	Ctri02723	LOC5577591|AAEL020476	Up	0.549087	0.1199	0.000726793
ISC/EB-1	Ctri05571	LOC5572644|-	Up	0.548164	0.0389283	1.03979e-05
ISC/EB-1	Ctri05571	LOC5572644|-	Up	0.548164	0.0389283	1.03979e-05
ISC/EB-1	Ctri12291	LOC110678469|AAEL027771	Up	0.546575	0.0879541	5.81704e-05
ISC/EB-1	Ctri12291	LOC110678469|AAEL027771	Up	0.546575	0.0879541	5.81704e-05
ISC/EB-1	Ctri05213	LOC5571429|AAEL009066	Up	0.546445	0.0628672	2.44597e-05
ISC/EB-1	Ctri05213	LOC5571429|AAEL009066	Up	0.546445	0.0628672	2.44597e-05
ISC/EB-1	Ctri11401	LOC5569432|AAEL007634	Up	0.545398	0.134989	0.00110128
ISC/EB-1	Ctri11401	LOC5569432|AAEL007634	Up	0.545398	0.134989	0.00110128
ISC/EB-1	Ctri01917	LOC5572725|AAEL009994	Up	0.544646	0.0235826	1.16578e-06
ISC/EB-1	Ctri01917	LOC5572725|AAEL009994	Up	0.544646	0.0235826	1.16578e-06
ISC/EB-1	Ctri11960	LOC5570554|AAEL008367	Up	0.54435	0.136372	0.00149129
ISC/EB-1	Ctri11960	LOC5570554|AAEL008367	Up	0.54435	0.136372	0.00149129
ISC/EB-1	Ctri04463	LOC5577626|AAEL003210	Up	0.54253	0.0876699	9.52689e-05
ISC/EB-1	Ctri04463	LOC5577626|AAEL003210	Up	0.54253	0.0876699	9.52689e-05
ISC/EB-1	Ctri01746		Up	0.540375	0.138651	0.00145695
ISC/EB-1	Ctri01746		Up	0.540375	0.138651	0.00145695
ISC/EB-1	Ctri06184	LOC5568016|AAEL006473	Up	0.540217	0.113733	0.000479493
ISC/EB-1	Ctri06184	LOC5568016|AAEL006473	Up	0.540217	0.113733	0.000479493
ISC/EB-1	Ctri07748		Up	0.537094	0.143928	0.00120141
ISC/EB-1	Ctri07748		Up	0.537094	0.143928	0.00120141
ISC/EB-1	Ctri05733	LOC5569832|AAEL007942	Up	0.5362	0.116777	0.000408901
ISC/EB-1	Ctri05733	LOC5569832|AAEL007942	Up	0.5362	0.116777	0.000408901
ISC/EB-1	Ctri07387	LOC5573473|AAEL010514	Up	0.536021	0.115514	0.000179225
ISC/EB-1	Ctri07387	LOC5573473|AAEL010514	Up	0.536021	0.115514	0.000179225
ISC/EB-1	Ctri12107	LOC5566372|AAEL005349	Up	0.534395	0.163591	0.00338772
ISC/EB-1	Ctri12107	LOC5566372|AAEL005349	Up	0.534395	0.163591	0.00338772
ISC/EB-1	Ctri06900	LOC5577095|AAEL012994	Up	0.533928	0.145366	0.00170704
ISC/EB-1	Ctri06900	LOC5577095|AAEL012994	Up	0.533928	0.145366	0.00170704
ISC/EB-1	Ctri04540	LOC5573541|-	Up	0.533768	0.103857	0.000183648
ISC/EB-1	Ctri04540	LOC5573541|-	Up	0.533768	0.103857	0.000183648
ISC/EB-1	Ctri11016	LOC5575971|AAEL012218	Up	0.527517	0.145643	0.00124216
ISC/EB-1	Ctri11016	LOC5575971|AAEL012218	Up	0.527517	0.145643	0.00124216
ISC/EB-1	Ctri01391	LOC5564724|AAEL004404	Up	0.526341	0.0791776	7.27521e-05
ISC/EB-1	Ctri01391	LOC5564724|AAEL004404	Up	0.526341	0.0791776	7.27521e-05
ISC/EB-1	Ctri12311	LOC5565979|AAEL005097	Up	0.52618	0.0172227	2.6155e-07
ISC/EB-1	Ctri12311	LOC5565979|AAEL005097	Up	0.52618	0.0172227	2.6155e-07
ISC/EB-1	Ctri07490	LOC5566318|-	Up	0.525528	0.111035	0.000707708
ISC/EB-1	Ctri07490	LOC5566318|-	Up	0.525528	0.111035	0.000707708
ISC/EB-1	Ctri07873	LOC5567494|AAEL000941	Up	0.525189	0.127622	0.000747623
ISC/EB-1	Ctri07873	LOC5567494|AAEL000941	Up	0.525189	0.127622	0.000747623
ISC/EB-1	Ctri02088	LOC5576737|AAEL002978	Up	0.524607	0.116515	0.000496847
ISC/EB-1	Ctri02088	LOC5576737|AAEL002978	Up	0.524607	0.116515	0.000496847
ISC/EB-1	Ctri02292		Up	0.524428	0.0907653	0.000212166
ISC/EB-1	Ctri02292		Up	0.524428	0.0907653	0.000212166
ISC/EB-1	Ctri02402		Up	0.523252	0.15669	0.00235472
ISC/EB-1	Ctri02402		Up	0.523252	0.15669	0.00235472
ISC/EB-1	Ctri11198	LOC5567260|AAEL005928	Up	0.521895	0.129407	0.000679556
ISC/EB-1	Ctri11198	LOC5567260|AAEL005928	Up	0.521895	0.129407	0.000679556
ISC/EB-1	Ctri10198	LOC5574213|AAEL021016	Up	0.521891	0.136265	0.000983644
ISC/EB-1	Ctri10198	LOC5574213|AAEL021016	Up	0.521891	0.136265	0.000983644
ISC/EB-1	Ctri06987	LOC5572365|AAEL009747	Up	0.521707	0.017623	7.0249e-05
ISC/EB-1	Ctri06987	LOC5572365|AAEL009747	Up	0.521707	0.017623	7.0249e-05
ISC/EB-1	Ctri03652	LOC5564925|AAEL019568	Up	0.520197	0.0395335	3.15288e-05
ISC/EB-1	Ctri03652	LOC5564925|AAEL019568	Up	0.520197	0.0395335	3.15288e-05
ISC/EB-1	Ctri08953		Up	0.519129	0.0242868	4.24083e-07
ISC/EB-1	Ctri08953		Up	0.519129	0.0242868	4.24083e-07
ISC/EB-1	Ctri05179	LOC5566511|AAEL012522	Up	0.51901	0.151082	0.0018404
ISC/EB-1	Ctri05179	LOC5566511|AAEL012522	Up	0.51901	0.151082	0.0018404
ISC/EB-1	Ctri11699	LOC5570055|AAEL000159	Up	0.518603	0.12631	0.00104926
ISC/EB-1	Ctri11699	LOC5570055|AAEL000159	Up	0.518603	0.12631	0.00104926
ISC/EB-1	Ctri10800		Up	0.518507	0.0779715	0.000120127
ISC/EB-1	Ctri10800		Up	0.518507	0.0779715	0.000120127
ISC/EB-1	Ctri05546	LOC5571642|AAEL001649	Up	0.515238	0.147722	0.00128731
ISC/EB-1	Ctri05546	LOC5571642|AAEL001649	Up	0.515238	0.147722	0.00128731
ISC/EB-1	Ctri08560	LOC5576635|AAEL012656	Up	0.512837	0.15676	0.00228014
ISC/EB-1	Ctri08560	LOC5576635|AAEL012656	Up	0.512837	0.15676	0.00228014
ISC/EB-1	Ctri12694	LOC5570208|AAEL008169	Up	0.512245	0.0913608	0.000132942
ISC/EB-1	Ctri12694	LOC5570208|AAEL008169	Up	0.512245	0.0913608	0.000132942
ISC/EB-1	Ctri10057	LOC5573705|AAEL010691	Up	0.508986	0.176044	0.00379924
ISC/EB-1	Ctri10057	LOC5573705|AAEL010691	Up	0.508986	0.176044	0.00379924
ISC/EB-1	Ctri09523		Up	0.508446	0.184913	0.00619876
ISC/EB-1	Ctri09523		Up	0.508446	0.184913	0.00619876
ISC/EB-1	Ctri09886	LOC5576039|AAEL012280	Up	0.507913	0.101458	0.00026481
ISC/EB-1	Ctri09886	LOC5576039|AAEL012280	Up	0.507913	0.101458	0.00026481
ISC/EB-1	Ctri02159	LOC23687901|AAEL017481	Up	0.50769	0.0466936	0.000585337
ISC/EB-1	Ctri02159	LOC23687901|AAEL017481	Up	0.50769	0.0466936	0.000585337
ISC/EB-1	Ctri06572	LOC110681315|AAEL004823	Up	0.506719	0.0578624	1.08607e-05
ISC/EB-1	Ctri06572	LOC110681315|AAEL004823	Up	0.506719	0.0578624	1.08607e-05
ISC/EB-1	Ctri11473	LOC5576103|AAEL002797	Up	0.505405	0.0889779	0.000130968
ISC/EB-1	Ctri11473	LOC5576103|AAEL002797	Up	0.505405	0.0889779	0.000130968
ISC/EB-1	Ctri07849	LOC5571907|AAEL009414	Up	0.504824	0.121003	0.000776871
ISC/EB-1	Ctri07849	LOC5571907|AAEL009414	Up	0.504824	0.121003	0.000776871
ISC/EB-1	Ctri08336	LOC5564118|AAEL004118	Up	0.503934	0.0853985	9.08712e-05
ISC/EB-1	Ctri08336	LOC5564118|AAEL004118	Up	0.503934	0.0853985	9.08712e-05
ISC/EB-1	Ctri09712		Up	0.501682	0.0371254	2.85324e-05
ISC/EB-1	Ctri09712		Up	0.501682	0.0371254	2.85324e-05
ISC/EB-1	Ctri01802	LOC5566651|AAEL005500	Up	0.501065	0.15038	0.00212384
ISC/EB-1	Ctri01802	LOC5566651|AAEL005500	Up	0.501065	0.15038	0.00212384
ISC/EB-1	Ctri02251	LOC110674049|AAEL027326	Up	0.500281	0.0980304	0.000171305
ISC/EB-1	Ctri02251	LOC110674049|AAEL027326	Up	0.500281	0.0980304	0.000171305
ISC/EB-1	Ctri06143	LOC5564874|AAEL004460	Up	0.500044	0.108351	0.000376365
ISC/EB-1	Ctri06143	LOC5564874|AAEL004460	Up	0.500044	0.108351	0.000376365
ISC/EB-1	Ctri08239	LOC5568998|AAEL025594	Up	0.499356	0.137488	0.00214068
ISC/EB-1	Ctri08239	LOC5568998|AAEL025594	Up	0.499356	0.137488	0.00214068
ISC/EB-1	Ctri03228		Up	0.499296	0.0948568	0.00019847
ISC/EB-1	Ctri03228		Up	0.499296	0.0948568	0.00019847
ISC/EB-1	Ctri08899	LOC5568308|AAEL019410	Up	0.499295	0.123289	0.00121766
ISC/EB-1	Ctri08899	LOC5568308|AAEL019410	Up	0.499295	0.123289	0.00121766
ISC/EB-1	Ctri03190	LOC5574597|AAEL002418	Up	0.498744	0.112575	0.000414037
ISC/EB-1	Ctri03190	LOC5574597|AAEL002418	Up	0.498744	0.112575	0.000414037
ISC/EB-1	Ctri08320	LOC5576341|AAEL000385	Up	0.496096	0.0856362	0.000313717
ISC/EB-1	Ctri08320	LOC5576341|AAEL000385	Up	0.496096	0.0856362	0.000313717
ISC/EB-1	Ctri03334	LOC5565931|AAEL025321	Up	0.495071	0.0823497	0.000403165
ISC/EB-1	Ctri03334	LOC5565931|AAEL025321	Up	0.495071	0.0823497	0.000403165
ISC/EB-1	Ctri12492		Up	0.494386	0.14039	0.00192732
ISC/EB-1	Ctri12492		Up	0.494386	0.14039	0.00192732
ISC/EB-1	Ctri01742	LOC5578082|AAEL003423	Up	0.492711	0.0570192	3.12807e-06
ISC/EB-1	Ctri01742	LOC5578082|AAEL003423	Up	0.492711	0.0570192	3.12807e-06
ISC/EB-1	Ctri06227	LOC5578184|AAEL003469	Up	0.492379	0.0728009	4.01493e-05
ISC/EB-1	Ctri06227	LOC5578184|AAEL003469	Up	0.492379	0.0728009	4.01493e-05
ISC/EB-1	mt_ND5		Up	0.491383	0.0475755	5.66452e-05
ISC/EB-1	mt_ND5		Up	0.491383	0.0475755	5.66452e-05
ISC/EB-1	Ctri01808	LOC5566654|AAEL005508	Up	0.490238	0.0649417	0.000102459
ISC/EB-1	Ctri01808	LOC5566654|AAEL005508	Up	0.490238	0.0649417	0.000102459
ISC/EB-1	Ctri11109	LOC5575797|AAEL012074	Up	0.490227	0.145081	0.00267062
ISC/EB-1	Ctri11109	LOC5575797|AAEL012074	Up	0.490227	0.145081	0.00267062
ISC/EB-1	Ctri00808	LOC5579467|AAEL023603	Up	0.489563	0.0654149	6.50341e-05
ISC/EB-1	Ctri00808	LOC5579467|AAEL023603	Up	0.489563	0.0654149	6.50341e-05
ISC/EB-1	Ctri06472	LOC5567501|AAEL006115	Up	0.485861	0.0423907	3.2401e-05
ISC/EB-1	Ctri06472	LOC5567501|AAEL006115	Up	0.485861	0.0423907	3.2401e-05
ISC/EB-1	Ctri10491	LOC5578857|AAEL027402	Up	0.485357	0.0573167	7.72969e-05
ISC/EB-1	Ctri10491	LOC5578857|AAEL027402	Up	0.485357	0.0573167	7.72969e-05
ISC/EB-1	Ctri08972	LOC23687462|AAEL017042	Up	0.48499	0.100398	0.000458082
ISC/EB-1	Ctri08972	LOC23687462|AAEL017042	Up	0.48499	0.100398	0.000458082
ISC/EB-1	Ctri07139	LOC5566901|AAEL000854	Up	0.484026	0.105	0.000452694
ISC/EB-1	Ctri07139	LOC5566901|AAEL000854	Up	0.484026	0.105	0.000452694
ISC/EB-1	Ctri05088	LOC5568807|AAEL001177	Up	0.48339	0.133106	0.00206775
ISC/EB-1	Ctri05088	LOC5568807|AAEL001177	Up	0.48339	0.133106	0.00206775
ISC/EB-1	Ctri08630	LOC5575764|AAEL002720	Up	0.479886	0.0670303	0.000114792
ISC/EB-1	Ctri08630	LOC5575764|AAEL002720	Up	0.479886	0.0670303	0.000114792
ISC/EB-1	Ctri07845	LOC110677919|AAEL020749	Up	0.479598	0.0174577	7.94697e-07
ISC/EB-1	Ctri07845	LOC110677919|AAEL020749	Up	0.479598	0.0174577	7.94697e-07
ISC/EB-1	Ctri03079	LOC5574614|AAEL011248	Up	0.477591	0.0744313	4.95729e-05
ISC/EB-1	Ctri03079	LOC5574614|AAEL011248	Up	0.477591	0.0744313	4.95729e-05
ISC/EB-1	Ctri01744	LOC5566079|AAEL015064	Up	0.47704	0.0303667	1.21647e-05
ISC/EB-1	Ctri01744	LOC5566079|AAEL015064	Up	0.47704	0.0303667	1.21647e-05
ISC/EB-1	Ctri12182	LOC5573965|AAEL010809	Up	0.476866	0.113891	0.000428312
ISC/EB-1	Ctri12182	LOC5573965|AAEL010809	Up	0.476866	0.113891	0.000428312
ISC/EB-1	Ctri11419	LOC5577757|-	Up	0.475568	0.10967	0.000520346
ISC/EB-1	Ctri11419	LOC5577757|-	Up	0.475568	0.10967	0.000520346
ISC/EB-1	Ctri01722	LOC5564039|AAEL004065	Up	0.475171	0.062453	8.13108e-05
ISC/EB-1	Ctri01722	LOC5564039|AAEL004065	Up	0.475171	0.062453	8.13108e-05
ISC/EB-1	Ctri05013		Up	0.473459	0.144177	0.00318335
ISC/EB-1	Ctri05013		Up	0.473459	0.144177	0.00318335
ISC/EB-1	Ctri12108	LOC5566373|AAEL005353	Up	0.471919	0.0807194	0.000177039
ISC/EB-1	Ctri12108	LOC5566373|AAEL005353	Up	0.471919	0.0807194	0.000177039
ISC/EB-1	Ctri10160	LOC5574458|AAEL011180	Up	0.469366	0.0687447	0.000148539
ISC/EB-1	Ctri10160	LOC5574458|AAEL011180	Up	0.469366	0.0687447	0.000148539
ISC/EB-1	Ctri07824	LOC5564364|AAEL013783	Up	0.467759	0.13922	0.00249478
ISC/EB-1	Ctri07824	LOC5564364|AAEL013783	Up	0.467759	0.13922	0.00249478
ISC/EB-1	Ctri01727	LOC5575292|AAEL023977	Up	0.466689	0.153866	0.00339932
ISC/EB-1	Ctri01727	LOC5575292|AAEL023977	Up	0.466689	0.153866	0.00339932
ISC/EB-1	Ctri00162	LOC5565989|AAEL026142	Up	0.466108	0.0966411	0.000250344
ISC/EB-1	Ctri00162	LOC5565989|AAEL026142	Up	0.466108	0.0966411	0.000250344
ISC/EB-1	Ctri01498	LOC5576587|AAEL002933	Up	0.464707	0.130803	0.00183783
ISC/EB-1	Ctri01498	LOC5576587|AAEL002933	Up	0.464707	0.130803	0.00183783
ISC/EB-1	Ctri02813	LOC5573534|AAEL010584	Up	0.464417	0.131264	0.00124579
ISC/EB-1	Ctri02813	LOC5573534|AAEL010584	Up	0.464417	0.131264	0.00124579
ISC/EB-1	Ctri09888	LOC5569582|AAEL007771	Up	0.464399	0.0156216	0.000102195
ISC/EB-1	Ctri09888	LOC5569582|AAEL007771	Up	0.464399	0.0156216	0.000102195
ISC/EB-1	Ctri07621	LOC110674263|AAEL023991	Up	0.463358	0.158336	0.00439912
ISC/EB-1	Ctri07621	LOC110674263|AAEL023991	Up	0.463358	0.158336	0.00439912
ISC/EB-1	Ctri11760	LOC5563590|AAEL000032	Up	0.461796	0.0174573	0.000119065
ISC/EB-1	Ctri11760	LOC5563590|AAEL000032	Up	0.461796	0.0174573	0.000119065
ISC/EB-1	Ctri01743	LOC5575428|AAEL011832	Up	0.460785	0.0576073	2.11245e-05
ISC/EB-1	Ctri01743	LOC5575428|AAEL011832	Up	0.460785	0.0576073	2.11245e-05
ISC/EB-1	Ctri00930	LOC5567100|AAEL005830	Up	0.460647	0.089709	0.000253314
ISC/EB-1	Ctri00930	LOC5567100|AAEL005830	Up	0.460647	0.089709	0.000253314
ISC/EB-1	Ctri11671	LOC5570147|AAEL008128	Up	0.460637	0.087597	0.000439662
ISC/EB-1	Ctri11671	LOC5570147|AAEL008128	Up	0.460637	0.087597	0.000439662
ISC/EB-1	Ctri06777	LOC5571173|AAEL008871	Up	0.460164	0.104987	0.000582244
ISC/EB-1	Ctri06777	LOC5571173|AAEL008871	Up	0.460164	0.104987	0.000582244
ISC/EB-1	Ctri02104	LOC5578942|AAEL003752	Up	0.459392	0.080252	0.00039602
ISC/EB-1	Ctri02104	LOC5578942|AAEL003752	Up	0.459392	0.080252	0.00039602
ISC/EB-1	Ctri05713	LOC5564556|AAEL004325	Up	0.45919	0.0197818	5.43822e-05
ISC/EB-1	Ctri05713	LOC5564556|AAEL004325	Up	0.45919	0.0197818	5.43822e-05
ISC/EB-1	Ctri07097	LOC5564584|AAEL004338	Up	0.458086	0.0671785	0.000140019
ISC/EB-1	Ctri07097	LOC5564584|AAEL004338	Up	0.458086	0.0671785	0.000140019
ISC/EB-1	Ctri09031		Up	0.456714	0.0936622	0.000228119
ISC/EB-1	Ctri09031		Up	0.456714	0.0936622	0.000228119
ISC/EB-1	Ctri02277	LOC5566483|AAEL005413	Up	0.455884	0.0997477	0.000425172
ISC/EB-1	Ctri02277	LOC5566483|AAEL005413	Up	0.455884	0.0997477	0.000425172
ISC/EB-1	Ctri09546	LOC5577568|AAEL013279	Up	0.455852	0.0536644	3.86823e-05
ISC/EB-1	Ctri09546	LOC5577568|AAEL013279	Up	0.455852	0.0536644	3.86823e-05
ISC/EB-1	mt_ND4		Up	0.455175	0.0358451	0.000257828
ISC/EB-1	mt_ND4		Up	0.455175	0.0358451	0.000257828
ISC/EB-1	Ctri04681	LOC5575982|AAEL019430	Up	0.454131	0.0725869	7.42323e-05
ISC/EB-1	Ctri04681	LOC5575982|AAEL019430	Up	0.454131	0.0725869	7.42323e-05
ISC/EB-1	Ctri00926		Up	0.454091	0.0919931	0.00062657
ISC/EB-1	Ctri00926		Up	0.454091	0.0919931	0.00062657
ISC/EB-1	Ctri01732	LOC110680755|AAEL011758	Up	0.452416	0.0195366	2.27822e-06
ISC/EB-1	Ctri01732	LOC110680755|AAEL011758	Up	0.452416	0.0195366	2.27822e-06
ISC/EB-1	Ctri09249	LOC5572696|AAEL009964	Up	0.450489	0.0380803	1.7198e-05
ISC/EB-1	Ctri09249	LOC5572696|AAEL009964	Up	0.450489	0.0380803	1.7198e-05
ISC/EB-1	Ctri04446	LOC5572798|AAEL001913	Up	0.449207	0.0305997	7.67714e-06
ISC/EB-1	Ctri04446	LOC5572798|AAEL001913	Up	0.449207	0.0305997	7.67714e-06
ISC/EB-1	Ctri08314	LOC5576321|AAEL000394	Up	0.447913	0.125787	0.00188773
ISC/EB-1	Ctri08314	LOC5576321|AAEL000394	Up	0.447913	0.125787	0.00188773
ISC/EB-1	Ctri11783	LOC5568784|AAEL007135	Up	0.447758	0.0710416	0.000110972
ISC/EB-1	Ctri11783	LOC5568784|AAEL007135	Up	0.447758	0.0710416	0.000110972
ISC/EB-1	Ctri06151	LOC5570014|AAEL000179	Up	0.447317	0.0800453	9.84966e-05
ISC/EB-1	Ctri06151	LOC5570014|AAEL000179	Up	0.447317	0.0800453	9.84966e-05
ISC/EB-1	Ctri01402	LOC5564091|AAEL028021	Up	0.447108	0.0310164	5.71745e-06
ISC/EB-1	Ctri01402	LOC5564091|AAEL028021	Up	0.447108	0.0310164	5.71745e-06
ISC/EB-1	Ctri01591	LOC5576307|AAEL012456	Up	0.445643	0.146627	0.00319936
ISC/EB-1	Ctri01591	LOC5576307|AAEL012456	Up	0.445643	0.146627	0.00319936
ISC/EB-1	Ctri04033	LOC5573121|AAEL001974	Up	0.444487	0.113599	0.00128695
ISC/EB-1	Ctri04033	LOC5573121|AAEL001974	Up	0.444487	0.113599	0.00128695
ISC/EB-1	Ctri01850	LOC5565051|AAEL004563	Up	0.444334	0.12295	0.00123042
ISC/EB-1	Ctri01850	LOC5565051|AAEL004563	Up	0.444334	0.12295	0.00123042
ISC/EB-1	Ctri04873	LOC5577566|AAEL013272	Up	0.444274	0.0440313	2.02371e-05
ISC/EB-1	Ctri04873	LOC5577566|AAEL013272	Up	0.444274	0.0440313	2.02371e-05
ISC/EB-1	Ctri04914	LOC5565774|AAEL004988	Up	0.443254	0.103259	0.000696026
ISC/EB-1	Ctri04914	LOC5565774|AAEL004988	Up	0.443254	0.103259	0.000696026
ISC/EB-1	Ctri03292	LOC5572582|AAEL009898	Up	0.443174	0.111492	0.000986696
ISC/EB-1	Ctri03292	LOC5572582|AAEL009898	Up	0.443174	0.111492	0.000986696
ISC/EB-1	Ctri04869	LOC5565318|AAEL004733	Up	0.441968	0.109751	0.00100505
ISC/EB-1	Ctri04869	LOC5565318|AAEL004733	Up	0.441968	0.109751	0.00100505
ISC/EB-1	Ctri04592		Up	0.440555	0.104631	0.00293031
ISC/EB-1	Ctri04592		Up	0.440555	0.104631	0.00293031
ISC/EB-1	Ctri12064	LOC5579168|AAEL003871	Up	0.440525	0.0797195	0.000316511
ISC/EB-1	Ctri12064	LOC5579168|AAEL003871	Up	0.440525	0.0797195	0.000316511
ISC/EB-1	Ctri02510		Up	0.440366	0.14686	0.00379924
ISC/EB-1	Ctri02510		Up	0.440366	0.14686	0.00379924
ISC/EB-1	Ctri05292	LOC5574739|AAEL011369	Up	0.440178	0.0838462	0.000314435
ISC/EB-1	Ctri05292	LOC5574739|AAEL011369	Up	0.440178	0.0838462	0.000314435
ISC/EB-1	Ctri03153	LOC110674166|AAEL020485	Up	0.439862	0.0618167	0.000107265
ISC/EB-1	Ctri03153	LOC110674166|AAEL020485	Up	0.439862	0.0618167	0.000107265
ISC/EB-1	Ctri04240	LOC5577544|AAEL013256	Up	0.439509	0.141397	0.00459879
ISC/EB-1	Ctri04240	LOC5577544|AAEL013256	Up	0.439509	0.141397	0.00459879
ISC/EB-1	Ctri04165	LOC5566987|AAEL005742	Up	0.439103	0.119324	0.00170756
ISC/EB-1	Ctri04165	LOC5566987|AAEL005742	Up	0.439103	0.119324	0.00170756
ISC/EB-1	Ctri00249		Up	0.438877	0.140311	0.00279944
ISC/EB-1	Ctri00249		Up	0.438877	0.140311	0.00279944
ISC/EB-1	Ctri04551	LOC5568239|AAEL006684	Up	0.436751	0.139276	0.00284843
ISC/EB-1	Ctri04551	LOC5568239|AAEL006684	Up	0.436751	0.139276	0.00284843
ISC/EB-1	Ctri10475	LOC5574115|-	Up	0.435139	0.15369	0.00439912
ISC/EB-1	Ctri10475	LOC5574115|-	Up	0.435139	0.15369	0.00439912
ISC/EB-1	Ctri00360	LOC5566228|AAEL005266	Up	0.433208	0.0158564	0.000100385
ISC/EB-1	Ctri00360	LOC5566228|AAEL005266	Up	0.433208	0.0158564	0.000100385
ISC/EB-1	Ctri03035	LOC5567793|AAEL000138	Up	0.432029	0.0668531	0.000172068
ISC/EB-1	Ctri03035	LOC5567793|AAEL000138	Up	0.432029	0.0668531	0.000172068
ISC/EB-1	Ctri05261	LOC5578243|AAEL015006	Up	0.431784	0.0163174	8.26929e-07
ISC/EB-1	Ctri05261	LOC5578243|AAEL015006	Up	0.431784	0.0163174	8.26929e-07
ISC/EB-1	Ctri01348	LOC5570419|AAEL008306	Up	0.431134	0.153322	0.00659868
ISC/EB-1	Ctri01348	LOC5570419|AAEL008306	Up	0.431134	0.153322	0.00659868
ISC/EB-1	Ctri12547	LOC23687533|AAEL017113	Up	0.43097	0.141324	0.00239952
ISC/EB-1	Ctri12547	LOC23687533|AAEL017113	Up	0.43097	0.141324	0.00239952
ISC/EB-1	Ctri04493	LOC5568488|AAEL006899	Up	0.430748	0.0694542	0.00141183
ISC/EB-1	Ctri04493	LOC5568488|AAEL006899	Up	0.430748	0.0694542	0.00141183
ISC/EB-1	mt_CYTB		Up	0.430118	0.0267852	1.87498e-05
ISC/EB-1	mt_CYTB		Up	0.430118	0.0267852	1.87498e-05
ISC/EB-1	Ctri12557	LOC5575105|AAEL011656	Up	0.429758	0.0181165	0.000149478
ISC/EB-1	Ctri12557	LOC5575105|AAEL011656	Up	0.429758	0.0181165	0.000149478
ISC/EB-1	Ctri07448	LOC5573790|AAEL010716	Up	0.428385	0.0946089	0.000210431
ISC/EB-1	Ctri07448	LOC5573790|AAEL010716	Up	0.428385	0.0946089	0.000210431
ISC/EB-1	Ctri00654	LOC5567722|AAEL021386	Up	0.428165	0.10094	0.000550247
ISC/EB-1	Ctri00654	LOC5567722|AAEL021386	Up	0.428165	0.10094	0.000550247
ISC/EB-1	Ctri06840	LOC5568202|AAEL006634	Up	0.427156	0.116613	0.00153974
ISC/EB-1	Ctri06840	LOC5568202|AAEL006634	Up	0.427156	0.116613	0.00153974
ISC/EB-1	Ctri02888		Up	0.425424	0.107454	0.00127296
ISC/EB-1	Ctri02888		Up	0.425424	0.107454	0.00127296
ISC/EB-1	Ctri12707	LOC5570218|AAEL008153	Up	0.422839	0.132454	0.00254654
ISC/EB-1	Ctri12707	LOC5570218|AAEL008153	Up	0.422839	0.132454	0.00254654
ISC/EB-1	Ctri00512	LOC5571564|AAEL009151	Up	0.42237	0.01946	8.27361e-07
ISC/EB-1	Ctri00512	LOC5571564|AAEL009151	Up	0.42237	0.01946	8.27361e-07
ISC/EB-1	Ctri10127	LOC5577272|AAEL013121	Up	0.42224	0.10868	0.000598468
ISC/EB-1	Ctri10127	LOC5577272|AAEL013121	Up	0.42224	0.10868	0.000598468
ISC/EB-1	Ctri07574	LOC5573361|-	Up	0.42212	0.10123	0.00144058
ISC/EB-1	Ctri07574	LOC5573361|-	Up	0.42212	0.10123	0.00144058
ISC/EB-1	Ctri09594	LOC110676045|AAEL022286	Up	0.421542	0.0277447	7.24067e-06
ISC/EB-1	Ctri09594	LOC110676045|AAEL022286	Up	0.421542	0.0277447	7.24067e-06
ISC/EB-1	Ctri01954	LOC5578532|AAEL013739	Up	0.421288	0.0761468	0.000303428
ISC/EB-1	Ctri01954	LOC5578532|AAEL013739	Up	0.421288	0.0761468	0.000303428
ISC/EB-1	Ctri10881	LOC5577327|AAEL000410	Up	0.421272	0.0715815	0.00136108
ISC/EB-1	Ctri10881	LOC5577327|AAEL000410	Up	0.421272	0.0715815	0.00136108
ISC/EB-1	Ctri03647	LOC5564921|AAEL004500	Up	0.420821	0.0388498	3.49468e-05
ISC/EB-1	Ctri03647	LOC5564921|AAEL004500	Up	0.420821	0.0388498	3.49468e-05
ISC/EB-1	Ctri09843	LOC5573667|AAEL010673	Up	0.420748	0.0728266	0.000347803
ISC/EB-1	Ctri09843	LOC5573667|AAEL010673	Up	0.420748	0.0728266	0.000347803
ISC/EB-1	Ctri00541	LOC5578625|AAEL003582	Up	0.420582	0.01765	0.000106631
ISC/EB-1	Ctri00541	LOC5578625|AAEL003582	Up	0.420582	0.01765	0.000106631
ISC/EB-1	Ctri03458		Up	0.420402	0.0325166	1.70917e-05
ISC/EB-1	Ctri03458		Up	0.420402	0.0325166	1.70917e-05
ISC/EB-1	Ctri10814	LOC5566950|-	Up	0.419724	0.129697	0.00406472
ISC/EB-1	Ctri10814	LOC5566950|-	Up	0.419724	0.129697	0.00406472
ISC/EB-1	Ctri03149	LOC23687928|AAEL017508	Up	0.418878	0.121075	0.00143278
ISC/EB-1	Ctri03149	LOC23687928|AAEL017508	Up	0.418878	0.121075	0.00143278
ISC/EB-1	Ctri03508	LOC5569529|AAEL007699	Up	0.418658	0.0179389	9.3933e-05
ISC/EB-1	Ctri03508	LOC5569529|AAEL007699	Up	0.418658	0.0179389	9.3933e-05
ISC/EB-1	Ctri03175	LOC5576201|AAEL012394	Up	0.418344	0.124561	0.00243581
ISC/EB-1	Ctri03175	LOC5576201|AAEL012394	Up	0.418344	0.124561	0.00243581
ISC/EB-1	Ctri11909		Up	0.417951	0.0486153	0.000650897
ISC/EB-1	Ctri11909		Up	0.417951	0.0486153	0.000650897
ISC/EB-1	Ctri11233	LOC5567581|AAEL006174	Up	0.417414	0.0952058	0.000564449
ISC/EB-1	Ctri11233	LOC5567581|AAEL006174	Up	0.417414	0.0952058	0.000564449
ISC/EB-1	Ctri00014	LOC5569936|AAEL008025	Up	0.417354	0.136408	0.00279944
ISC/EB-1	Ctri00014	LOC5569936|AAEL008025	Up	0.417354	0.136408	0.00279944
ISC/EB-1	Ctri12050	LOC5579186|AAEL003872	Up	0.415388	0.0186213	9.29747e-08
ISC/EB-1	Ctri12050	LOC5579186|AAEL003872	Up	0.415388	0.0186213	9.29747e-08
ISC/EB-1	Ctri11410	LOC5571466|AAEL009101	Up	0.413686	0.0433025	5.61796e-06
ISC/EB-1	Ctri11410	LOC5571466|AAEL009101	Up	0.413686	0.0433025	5.61796e-06
ISC/EB-1	Ctri06434	LOC5569531|AAEL007715	Up	0.412488	0.0166889	4.20138e-07
ISC/EB-1	Ctri06434	LOC5569531|AAEL007715	Up	0.412488	0.0166889	4.20138e-07
ISC/EB-1	Ctri05098		Up	0.411844	0.176834	0.0243951
ISC/EB-1	Ctri05098		Up	0.411844	0.176834	0.0243951
ISC/EB-1	Ctri00725	LOC5565270|AAEL004691	Up	0.411759	0.0374411	0.000307099
ISC/EB-1	Ctri00725	LOC5565270|AAEL004691	Up	0.411759	0.0374411	0.000307099
ISC/EB-1	Ctri01928		Up	0.41166	0.112424	0.00178821
ISC/EB-1	Ctri01928		Up	0.41166	0.112424	0.00178821
ISC/EB-1	Ctri09323	LOC5565541|AAEL004829	Up	0.411655	0.0803083	0.00014669
ISC/EB-1	Ctri09323	LOC5565541|AAEL004829	Up	0.411655	0.0803083	0.00014669
ISC/EB-1	Ctri08409	LOC5573217|AAEL010299	Up	0.411404	0.0182558	7.52639e-07
ISC/EB-1	Ctri08409	LOC5573217|AAEL010299	Up	0.411404	0.0182558	7.52639e-07
ISC/EB-1	Ctri04757	LOC5569035|AAEL026700	Up	0.409798	0.109921	0.00101683
ISC/EB-1	Ctri04757	LOC5569035|AAEL026700	Up	0.409798	0.109921	0.00101683
ISC/EB-1	Ctri03755	LOC5577910|AAEL003352	Up	0.409151	0.0587391	4.86626e-05
ISC/EB-1	Ctri03755	LOC5577910|AAEL003352	Up	0.409151	0.0587391	4.86626e-05
ISC/EB-1	Ctri12791		Up	0.407815	0.0728548	0.00149179
ISC/EB-1	Ctri12791		Up	0.407815	0.0728548	0.00149179
ISC/EB-1	Ctri10209		Up	0.407778	0.0856824	0.000767673
ISC/EB-1	Ctri10209		Up	0.407778	0.0856824	0.000767673
ISC/EB-1	Ctri02142	LOC5573872|AAEL010787	Up	0.407442	0.097093	0.000916206
ISC/EB-1	Ctri02142	LOC5573872|AAEL010787	Up	0.407442	0.097093	0.000916206
ISC/EB-1	Ctri09190	LOC5563743|AAEL014094	Up	0.406952	0.125153	0.00276403
ISC/EB-1	Ctri09190	LOC5563743|AAEL014094	Up	0.406952	0.125153	0.00276403
ISC/EB-1	Ctri11160	LOC5572308|AAEL009700	Up	0.406875	0.0977491	0.000911663
ISC/EB-1	Ctri11160	LOC5572308|AAEL009700	Up	0.406875	0.0977491	0.000911663
ISC/EB-1	Ctri02383	LOC5576199|AAEL012387	Up	0.406622	0.145727	0.0069986
ISC/EB-1	Ctri02383	LOC5576199|AAEL012387	Up	0.406622	0.145727	0.0069986
ISC/EB-1	Ctri00458	LOC5580030|AAEL009653	Up	0.406201	0.0177499	0.000105275
ISC/EB-1	Ctri00458	LOC5580030|AAEL009653	Up	0.406201	0.0177499	0.000105275
ISC/EB-1	Ctri01262	LOC5565085|AAEL023069	Up	0.406122	0.0907994	0.000632889
ISC/EB-1	Ctri01262	LOC5565085|AAEL023069	Up	0.406122	0.0907994	0.000632889
ISC/EB-1	Ctri12061		Up	0.405612	0.0467452	7.45865e-06
ISC/EB-1	Ctri12061		Up	0.405612	0.0467452	7.45865e-06
ISC/EB-1	mt_COX1		Up	0.405473	0.0238062	6.60314e-07
ISC/EB-1	mt_COX1		Up	0.405473	0.0238062	6.60314e-07
ISC/EB-1	Ctri11142	LOC5573881|AAEL010797	Up	0.404759	0.139875	0.00379924
ISC/EB-1	Ctri11142	LOC5573881|AAEL010797	Up	0.404759	0.139875	0.00379924
ISC/EB-1	Ctri12696	LOC5570205|AAEL008167	Up	0.403971	0.0719837	0.000161793
ISC/EB-1	Ctri12696	LOC5570205|AAEL008167	Up	0.403971	0.0719837	0.000161793
ISC/EB-1	Ctri11892	LOC5567684|AAEL006251	Up	0.403256	0.0742396	0.000177969
ISC/EB-1	Ctri11892	LOC5567684|AAEL006251	Up	0.403256	0.0742396	0.000177969
ISC/EB-1	Ctri05492	LOC5569497|AAEL007681	Up	0.403056	0.0774488	0.000301381
ISC/EB-1	Ctri05492	LOC5569497|AAEL007681	Up	0.403056	0.0774488	0.000301381
ISC/EB-1	Ctri12780		Up	0.402041	0.0889892	0.000725475
ISC/EB-1	Ctri12780		Up	0.402041	0.0889892	0.000725475
ISC/EB-1	Ctri09858	LOC5575820|AAEL012093	Up	0.401225	0.115328	0.00177847
ISC/EB-1	Ctri09858	LOC5575820|AAEL012093	Up	0.401225	0.115328	0.00177847
ISC/EB-1	Ctri04611	LOC5577107|AAEL013002	Up	0.39836	0.130144	0.00279944
ISC/EB-1	Ctri04611	LOC5577107|AAEL013002	Up	0.39836	0.130144	0.00279944
ISC/EB-1	Ctri06734		Up	0.397112	0.132329	0.00379924
ISC/EB-1	Ctri06734		Up	0.397112	0.132329	0.00379924
ISC/EB-1	mt_ATP6		Up	0.39675	0.0351377	4.78835e-06
ISC/EB-1	mt_ATP6		Up	0.39675	0.0351377	4.78835e-06
ISC/EB-1	Ctri05175	LOC5566092|AAEL005170	Up	0.395896	0.0321974	3.70717e-05
ISC/EB-1	Ctri05175	LOC5566092|AAEL005170	Up	0.395896	0.0321974	3.70717e-05
ISC/EB-1	Ctri01488	LOC5576466|AAEL002888	Up	0.395451	0.153699	0.0125975
ISC/EB-1	Ctri01488	LOC5576466|AAEL002888	Up	0.395451	0.153699	0.0125975
ISC/EB-1	Ctri10485	LOC5578146|AAEL013527	Up	0.395204	0.116388	0.00231636
ISC/EB-1	Ctri10485	LOC5578146|AAEL013527	Up	0.395204	0.116388	0.00231636
ISC/EB-1	Ctri02016	LOC5564809|AAEL014630	Up	0.395086	0.159446	0.0161968
ISC/EB-1	Ctri02016	LOC5564809|AAEL014630	Up	0.395086	0.159446	0.0161968
ISC/EB-1	Ctri09753	LOC5564962|AAEL014889	Up	0.392622	0.0695696	0.00156418
ISC/EB-1	Ctri09753	LOC5564962|AAEL014889	Up	0.392622	0.0695696	0.00156418
ISC/EB-1	Ctri11247		Up	0.392235	0.0801788	0.000328829
ISC/EB-1	Ctri11247		Up	0.392235	0.0801788	0.000328829
ISC/EB-1	Ctri02924		Up	0.391652	0.0612364	0.00023972
ISC/EB-1	Ctri02924		Up	0.391652	0.0612364	0.00023972
ISC/EB-1	Ctri11946	LOC5564281|AAEL014375	Up	0.391587	0.120367	0.00244419
ISC/EB-1	Ctri11946	LOC5564281|AAEL014375	Up	0.391587	0.120367	0.00244419
ISC/EB-1	Ctri00877	LOC5569566|AAEL007752	Up	0.38939	0.0363409	3.35063e-05
ISC/EB-1	Ctri00877	LOC5569566|AAEL007752	Up	0.38939	0.0363409	3.35063e-05
ISC/EB-1	Ctri10005	LOC5569591|AAEL026497	Up	0.389088	0.142367	0.00739852
ISC/EB-1	Ctri10005	LOC5569591|AAEL026497	Up	0.389088	0.142367	0.00739852
ISC/EB-1	Ctri10361	LOC5573763|AAEL000269	Up	0.388336	0.0282939	6.60849e-06
ISC/EB-1	Ctri10361	LOC5573763|AAEL000269	Up	0.388336	0.0282939	6.60849e-06
ISC/EB-1	Ctri04229	LOC5575843|AAEL012122	Up	0.387632	0.134287	0.0059988
ISC/EB-1	Ctri04229	LOC5575843|AAEL012122	Up	0.387632	0.134287	0.0059988
ISC/EB-1	Ctri10832	LOC5570989|AAEL008719	Up	0.387359	0.063708	8.61977e-05
ISC/EB-1	Ctri10832	LOC5570989|AAEL008719	Up	0.387359	0.063708	8.61977e-05
ISC/EB-1	Ctri05898	LOC5566532|AAEL015202	Up	0.387314	0.12277	0.00279944
ISC/EB-1	Ctri05898	LOC5566532|AAEL015202	Up	0.387314	0.12277	0.00279944
ISC/EB-1	Ctri09214	LOC5578833|AAEL013876	Up	0.386987	0.0640047	0.000243421
ISC/EB-1	Ctri09214	LOC5578833|AAEL013876	Up	0.386987	0.0640047	0.000243421
ISC/EB-1	Ctri06080	LOC5577035|AAEL012943	Up	0.386516	0.121262	0.00259948
ISC/EB-1	Ctri06080	LOC5577035|AAEL012943	Up	0.386516	0.121262	0.00259948
ISC/EB-1	Ctri11423		Up	0.385087	0.109247	0.00172074
ISC/EB-1	Ctri11423		Up	0.385087	0.109247	0.00172074
ISC/EB-1	Ctri05628	LOC5579391|AAEL015493	Up	0.38481	0.0621151	0.000116585
ISC/EB-1	Ctri05628	LOC5579391|AAEL015493	Up	0.38481	0.0621151	0.000116585
ISC/EB-1	Ctri09904	LOC5572534|AAEL009859	Up	0.384263	0.035118	6.28975e-05
ISC/EB-1	Ctri09904	LOC5572534|AAEL009859	Up	0.384263	0.035118	6.28975e-05
ISC/EB-1	Ctri09827	LOC5565624|AAEL014292	Up	0.383712	0.0305852	2.06394e-05
ISC/EB-1	Ctri09827	LOC5565624|AAEL014292	Up	0.383712	0.0305852	2.06394e-05
ISC/EB-1	Ctri05373	LOC5566520|AAEL005457	Up	0.383425	0.0932018	0.0009714
ISC/EB-1	Ctri05373	LOC5566520|AAEL005457	Up	0.383425	0.0932018	0.0009714
ISC/EB-1	Ctri00751	LOC5567908|AAEL006363	Up	0.381185	0.130735	0.00359928
ISC/EB-1	Ctri00751	LOC5567908|AAEL006363	Up	0.381185	0.130735	0.00359928
ISC/EB-1	Ctri00378	LOC5573489|AAEL014505	Up	0.381011	0.101946	0.0013232
ISC/EB-1	Ctri00378	LOC5573489|AAEL014505	Up	0.381011	0.101946	0.0013232
ISC/EB-1	Ctri00936	LOC5567106|-	Up	0.380905	0.122581	0.00354096
ISC/EB-1	Ctri00936	LOC5567106|-	Up	0.380905	0.122581	0.00354096
ISC/EB-1	Ctri07709	LOC5573260|AAEL010359	Up	0.380785	0.100438	0.000707386
ISC/EB-1	Ctri07709	LOC5573260|AAEL010359	Up	0.380785	0.100438	0.000707386
ISC/EB-1	Ctri05990		Up	0.3802	0.139494	0.00659868
ISC/EB-1	Ctri05990		Up	0.3802	0.139494	0.00659868
ISC/EB-1	Ctri01388	LOC5580073|AAEL002158	Up	0.380158	0.0423211	1.49839e-05
ISC/EB-1	Ctri01388	LOC5580073|AAEL002158	Up	0.380158	0.0423211	1.49839e-05
ISC/EB-1	Ctri07695	LOC5577284|AAEL013138	Up	0.379767	0.143743	0.00979804
ISC/EB-1	Ctri07695	LOC5577284|AAEL013138	Up	0.379767	0.143743	0.00979804
ISC/EB-1	Ctri01715	LOC5564041|AAEL004042	Up	0.379032	0.107292	0.0018039
ISC/EB-1	Ctri01715	LOC5564041|AAEL004042	Up	0.379032	0.107292	0.0018039
ISC/EB-1	Ctri03708	LOC5568194|AAEL006611	Up	0.377626	0.152696	0.0167966
ISC/EB-1	Ctri03708	LOC5568194|AAEL006611	Up	0.377626	0.152696	0.0167966
ISC/EB-1	Ctri08379	LOC5568602|AAEL001103	Up	0.376494	0.117052	0.0034379
ISC/EB-1	Ctri08379	LOC5568602|AAEL001103	Up	0.376494	0.117052	0.0034379
ISC/EB-1	Ctri08050	LOC110680228|-	Up	0.374959	0.0210547	3.56254e-06
ISC/EB-1	Ctri08050	LOC110680228|-	Up	0.374959	0.0210547	3.56254e-06
ISC/EB-1	Ctri00455	LOC110676091|AAEL020757	Up	0.374818	0.114249	0.00288132
ISC/EB-1	Ctri00455	LOC110676091|AAEL020757	Up	0.374818	0.114249	0.00288132
ISC/EB-1	Ctri06203	LOC5579851|AAEL005861	Up	0.374467	0.105162	0.00143638
ISC/EB-1	Ctri06203	LOC5579851|AAEL005861	Up	0.374467	0.105162	0.00143638
ISC/EB-1	Ctri08808	LOC5579032|AAEL013969	Up	0.373602	0.0642057	2.12327e-05
ISC/EB-1	Ctri08808	LOC5579032|AAEL013969	Up	0.373602	0.0642057	2.12327e-05
ISC/EB-1	Ctri09441	LOC5576170|AAEL012359	Up	0.372988	0.0320909	2.4214e-05
ISC/EB-1	Ctri09441	LOC5576170|AAEL012359	Up	0.372988	0.0320909	2.4214e-05
ISC/EB-1	Ctri01296	LOC5576896|AAEL003039	Up	0.372612	0.0426367	3.03809e-05
ISC/EB-1	Ctri01296	LOC5576896|AAEL003039	Up	0.372612	0.0426367	3.03809e-05
ISC/EB-1	Ctri01232	LOC5576758|AAEL025553	Up	0.372091	0.0164867	5.85504e-07
ISC/EB-1	Ctri01232	LOC5576758|AAEL025553	Up	0.372091	0.0164867	5.85504e-07
ISC/EB-1	Ctri05314	LOC5570895|AAEL001496	Up	0.371927	0.132679	0.00619876
ISC/EB-1	Ctri05314	LOC5570895|AAEL001496	Up	0.371927	0.132679	0.00619876
ISC/EB-1	Ctri04084	LOC5580034|AAEL010227	Up	0.37171	0.160589	0.019796
ISC/EB-1	Ctri04084	LOC5580034|AAEL010227	Up	0.37171	0.160589	0.019796
ISC/EB-1	Ctri12527	LOC5576653|AAEL012686	Up	0.371092	0.0174602	6.20293e-06
ISC/EB-1	Ctri12527	LOC5576653|AAEL012686	Up	0.371092	0.0174602	6.20293e-06
ISC/EB-1	Ctri08987	LOC5570396|AAEL008291	Up	0.370915	0.106646	0.0016188
ISC/EB-1	Ctri08987	LOC5570396|AAEL008291	Up	0.370915	0.106646	0.0016188
ISC/EB-1	Ctri12709	LOC5570228|AAEL008185	Up	0.370757	0.153073	0.0181964
ISC/EB-1	Ctri12709	LOC5570228|AAEL008185	Up	0.370757	0.153073	0.0181964
ISC/EB-1	Ctri01571	LOC5574977|AAEL002504	Up	0.369991	0.0478248	0.000758342
ISC/EB-1	Ctri01571	LOC5574977|AAEL002504	Up	0.369991	0.0478248	0.000758342
ISC/EB-1	Ctri07116	LOC5566864|AAEL000847	Up	0.369447	0.146214	0.015197
ISC/EB-1	Ctri07116	LOC5566864|AAEL000847	Up	0.369447	0.146214	0.015197
ISC/EB-1	Ctri09319		Up	0.369363	0.109275	0.00277588
ISC/EB-1	Ctri09319		Up	0.369363	0.109275	0.00277588
ISC/EB-1	Ctri10380	LOC110675667|AAEL024853	Up	0.368853	0.0885442	0.00099341
ISC/EB-1	Ctri10380	LOC110675667|AAEL024853	Up	0.368853	0.0885442	0.00099341
ISC/EB-1	Ctri05060	LOC5577025|AAEL012932	Up	0.367844	0.141876	0.0115977
ISC/EB-1	Ctri05060	LOC5577025|AAEL012932	Up	0.367844	0.141876	0.0115977
ISC/EB-1	Ctri05809	LOC5568828|AAEL001164	Up	0.366641	0.0627766	0.000359922
ISC/EB-1	Ctri05809	LOC5568828|AAEL001164	Up	0.366641	0.0627766	0.000359922
ISC/EB-1	Ctri08554	LOC5571757|AAEL009302	Up	0.365948	0.147834	0.0121976
ISC/EB-1	Ctri08554	LOC5571757|AAEL009302	Up	0.365948	0.147834	0.0121976
ISC/EB-1	Ctri06382	LOC5573615|AAEL010611	Up	0.365783	0.0666641	0.000114007
ISC/EB-1	Ctri06382	LOC5573615|AAEL010611	Up	0.365783	0.0666641	0.000114007
ISC/EB-1	Ctri10951	LOC5567167|AAEL005897	Up	0.365416	0.106929	0.00219378
ISC/EB-1	Ctri10951	LOC5567167|AAEL005897	Up	0.365416	0.106929	0.00219378
ISC/EB-1	Ctri12406	LOC5567821|AAEL000986	Up	0.364854	0.0606427	0.00135946
ISC/EB-1	Ctri12406	LOC5567821|AAEL000986	Up	0.364854	0.0606427	0.00135946
ISC/EB-1	Ctri11717	LOC5564272|AAEL014368	Up	0.362863	0.155591	0.0193961
ISC/EB-1	Ctri11717	LOC5564272|AAEL014368	Up	0.362863	0.155591	0.0193961
ISC/EB-1	Ctri01728	LOC110680525|AAEL011755	Up	0.361044	0.0883992	0.000888507
ISC/EB-1	Ctri01728	LOC110680525|AAEL011755	Up	0.361044	0.0883992	0.000888507
ISC/EB-1	Ctri01177		Up	0.360578	0.141525	0.0119976
ISC/EB-1	Ctri01177		Up	0.360578	0.141525	0.0119976
ISC/EB-1	Ctri05078	LOC5570432|AAEL008329	Up	0.360455	0.0166153	0.000166986
ISC/EB-1	Ctri05078	LOC5570432|AAEL008329	Up	0.360455	0.0166153	0.000166986
ISC/EB-1	Ctri02293		Up	0.360314	0.103953	0.0018625
ISC/EB-1	Ctri02293		Up	0.360314	0.103953	0.0018625
ISC/EB-1	Ctri03065	LOC5576914|AAEL012865	Up	0.3603	0.0741266	0.000286077
ISC/EB-1	Ctri03065	LOC5576914|AAEL012865	Up	0.3603	0.0741266	0.000286077
ISC/EB-1	Ctri12183		Up	0.356924	0.0394533	1.95373e-05
ISC/EB-1	Ctri12183		Up	0.356924	0.0394533	1.95373e-05
ISC/EB-1	Ctri10848	LOC5577369|AAEL000454	Up	0.356612	0.0684615	0.000397577
ISC/EB-1	Ctri10848	LOC5577369|AAEL000454	Up	0.356612	0.0684615	0.000397577
ISC/EB-1	Ctri06945	LOC5564296|AAEL014393	Up	0.356561	0.0857837	0.00078713
ISC/EB-1	Ctri06945	LOC5564296|AAEL014393	Up	0.356561	0.0857837	0.00078713
ISC/EB-1	Ctri03521	LOC5568072|AAEL006514	Up	0.356307	0.134238	0.009998
ISC/EB-1	Ctri03521	LOC5568072|AAEL006514	Up	0.356307	0.134238	0.009998
ISC/EB-1	Ctri02718		Up	0.355385	0.0861341	0.00107004
ISC/EB-1	Ctri02718		Up	0.355385	0.0861341	0.00107004
ISC/EB-1	Ctri11831	LOC5576837|AAEL012816	Up	0.355261	0.105264	0.00252836
ISC/EB-1	Ctri11831	LOC5576837|AAEL012816	Up	0.355261	0.105264	0.00252836
ISC/EB-1	Ctri08925	LOC5570675|AAEL008481	Up	0.354977	0.0148034	9.81481e-05
ISC/EB-1	Ctri08925	LOC5570675|AAEL008481	Up	0.354977	0.0148034	9.81481e-05
ISC/EB-1	Ctri05182	LOC5564673|AAEL014557	Up	0.354177	0.119375	0.0039992
ISC/EB-1	Ctri05182	LOC5564673|AAEL014557	Up	0.354177	0.119375	0.0039992
ISC/EB-1	Ctri04816	LOC5567311|AAEL005965	Up	0.353743	0.100173	0.00198545
ISC/EB-1	Ctri04816	LOC5567311|AAEL005965	Up	0.353743	0.100173	0.00198545
ISC/EB-1	Ctri04130	LOC5575073|AAEL011633	Up	0.35249	0.140021	0.015197
ISC/EB-1	Ctri04130	LOC5575073|AAEL011633	Up	0.35249	0.140021	0.015197
ISC/EB-1	Ctri00457	LOC5574980|AAEL002508	Up	0.35015	0.130279	0.00819836
ISC/EB-1	Ctri00457	LOC5574980|AAEL002508	Up	0.35015	0.130279	0.00819836
ISC/EB-1	Ctri04768	LOC5577612|AAEL026088	Up	0.349851	0.151521	0.0229954
ISC/EB-1	Ctri04768	LOC5577612|AAEL026088	Up	0.349851	0.151521	0.0229954
ISC/EB-1	Ctri07324	LOC5567237|AAEL000874	Up	0.349358	0.123745	0.00539892
ISC/EB-1	Ctri07324	LOC5567237|AAEL000874	Up	0.349358	0.123745	0.00539892
ISC/EB-1	Ctri07085	LOC5577180|AAEL013052	Up	0.349261	0.0434818	7.84789e-05
ISC/EB-1	Ctri07085	LOC5577180|AAEL013052	Up	0.349261	0.0434818	7.84789e-05
ISC/EB-1	Ctri04414	LOC5570695|AAEL008492	Up	0.348894	0.0910646	0.00164494
ISC/EB-1	Ctri04414	LOC5570695|AAEL008492	Up	0.348894	0.0910646	0.00164494
ISC/EB-1	Ctri01572	LOC5574976|AAEL002501	Up	0.348302	0.0651701	0.00021664
ISC/EB-1	Ctri01572	LOC5574976|AAEL002501	Up	0.348302	0.0651701	0.00021664
ISC/EB-1	Ctri08478	LOC5571450|AAEL009078	Up	0.347934	0.06848	0.000370441
ISC/EB-1	Ctri08478	LOC5571450|AAEL009078	Up	0.347934	0.06848	0.000370441
ISC/EB-1	Ctri10222	LOC5568880|AAEL007184	Up	0.347895	0.0448137	9.11209e-05
ISC/EB-1	Ctri10222	LOC5568880|AAEL007184	Up	0.347895	0.0448137	9.11209e-05
ISC/EB-1	Ctri02879		Up	0.347471	0.0424051	3.01136e-05
ISC/EB-1	Ctri02879		Up	0.347471	0.0424051	3.01136e-05
ISC/EB-1	Ctri01828	LOC5576001|AAEL012243	Up	0.34745	0.0791318	0.000902528
ISC/EB-1	Ctri01828	LOC5576001|AAEL012243	Up	0.34745	0.0791318	0.000902528
ISC/EB-1	mt_COX3		Up	0.346258	0.0242394	7.70178e-06
ISC/EB-1	mt_COX3		Up	0.346258	0.0242394	7.70178e-06
ISC/EB-1	Ctri06653		Up	0.344972	0.12275	0.00519896
ISC/EB-1	Ctri06653		Up	0.344972	0.12275	0.00519896
ISC/EB-1	Ctri09296	LOC5571484|AAEL001605	Up	0.344856	0.0812615	0.000685486
ISC/EB-1	Ctri09296	LOC5571484|AAEL001605	Up	0.344856	0.0812615	0.000685486
ISC/EB-1	Ctri00405	LOC5566959|AAEL005722	Up	0.344484	0.0187863	5.35714e-06
ISC/EB-1	Ctri00405	LOC5566959|AAEL005722	Up	0.344484	0.0187863	5.35714e-06
ISC/EB-1	Ctri01457	LOC5579012|AAEL003774	Up	0.344098	0.134942	0.0113977
ISC/EB-1	Ctri01457	LOC5579012|AAEL003774	Up	0.344098	0.134942	0.0113977
ISC/EB-1	Ctri00381	LOC5564532|AAEL014501	Up	0.343569	0.106508	0.00229455
ISC/EB-1	Ctri00381	LOC5564532|AAEL014501	Up	0.343569	0.106508	0.00229455
ISC/EB-1	Ctri10821		Up	0.34299	0.0311769	3.46219e-05
ISC/EB-1	Ctri10821		Up	0.34299	0.0311769	3.46219e-05
ISC/EB-1	Ctri08063	LOC5572093|AAEL009507	Up	0.342773	0.119909	0.00739852
ISC/EB-1	Ctri08063	LOC5572093|AAEL009507	Up	0.342773	0.119909	0.00739852
ISC/EB-1	Ctri02706		Up	0.339356	0.143328	0.0163967
ISC/EB-1	Ctri02706		Up	0.339356	0.143328	0.0163967
ISC/EB-1	Ctri03201	LOC5578684|AAEL003645	Up	0.339056	0.0917417	0.0010804
ISC/EB-1	Ctri03201	LOC5578684|AAEL003645	Up	0.339056	0.0917417	0.0010804
ISC/EB-1	Ctri07378	LOC5575037|AAEL011587	Up	0.338844	0.0205158	1.76204e-05
ISC/EB-1	Ctri07378	LOC5575037|AAEL011587	Up	0.338844	0.0205158	1.76204e-05
ISC/EB-1	Ctri12660	LOC5572843|AAEL010059	Up	0.338302	0.0459512	7.28779e-05
ISC/EB-1	Ctri12660	LOC5572843|AAEL010059	Up	0.338302	0.0459512	7.28779e-05
ISC/EB-1	mt_COX2		Up	0.337962	0.0247773	3.47253e-05
ISC/EB-1	mt_COX2		Up	0.337962	0.0247773	3.47253e-05
ISC/EB-1	Ctri03505	LOC5569520|AAEL007707	Up	0.337618	0.0563502	0.000154044
ISC/EB-1	Ctri03505	LOC5569520|AAEL007707	Up	0.337618	0.0563502	0.000154044
ISC/EB-1	Ctri06098	LOC5565701|AAEL014944	Up	0.33731	0.0310596	4.01944e-05
ISC/EB-1	Ctri06098	LOC5565701|AAEL014944	Up	0.33731	0.0310596	4.01944e-05
ISC/EB-1	Ctri01711	LOC23687618|AAEL017198	Up	0.337108	0.0165998	0.000148768
ISC/EB-1	Ctri01711	LOC23687618|AAEL017198	Up	0.337108	0.0165998	0.000148768
ISC/EB-1	Ctri00646		Up	0.336828	0.119268	0.004999
ISC/EB-1	Ctri00646		Up	0.336828	0.119268	0.004999
ISC/EB-1	Ctri05055	LOC5575681|AAEL011992	Up	0.336792	0.0801444	0.000592708
ISC/EB-1	Ctri05055	LOC5575681|AAEL011992	Up	0.336792	0.0801444	0.000592708
ISC/EB-1	Ctri02587	LOC5577509|AAEL003206	Up	0.336229	0.124394	0.00639872
ISC/EB-1	Ctri02587	LOC5577509|AAEL003206	Up	0.336229	0.124394	0.00639872
ISC/EB-1	Ctri10155	LOC5574463|AAEL011178	Up	0.335988	0.134545	0.0141972
ISC/EB-1	Ctri10155	LOC5574463|AAEL011178	Up	0.335988	0.134545	0.0141972
ISC/EB-1	Ctri08224	LOC5569745|AAEL007883	Up	0.334566	0.0662841	0.000296112
ISC/EB-1	Ctri08224	LOC5569745|AAEL007883	Up	0.334566	0.0662841	0.000296112
ISC/EB-1	Ctri08568	LOC5570670|AAEL008490	Up	0.334111	0.0683123	0.000229817
ISC/EB-1	Ctri08568	LOC5570670|AAEL008490	Up	0.334111	0.0683123	0.000229817
ISC/EB-1	Ctri10334	LOC5568291|AAEL006748	Up	0.334082	0.118001	0.00559888
ISC/EB-1	Ctri10334	LOC5568291|AAEL006748	Up	0.334082	0.118001	0.00559888
ISC/EB-1	Ctri08211	LOC5567491|AAEL000951	Up	0.333842	0.0210692	7.26793e-07
ISC/EB-1	Ctri08211	LOC5567491|AAEL000951	Up	0.333842	0.0210692	7.26793e-07
ISC/EB-1	Ctri04656	LOC5570616|AAEL008434	Up	0.333337	0.072954	0.000521122
ISC/EB-1	Ctri04656	LOC5570616|AAEL008434	Up	0.333337	0.072954	0.000521122
ISC/EB-1	Ctri12746	LOC5568556|AAEL001126	Up	0.33277	0.113133	0.00239952
ISC/EB-1	Ctri12746	LOC5568556|AAEL001126	Up	0.33277	0.113133	0.00239952
ISC/EB-1	Ctri01569		Up	0.33196	0.0666537	0.000346145
ISC/EB-1	Ctri01569		Up	0.33196	0.0666537	0.000346145
ISC/EB-1	Ctri02329	LOC5578994|AAEL003801	Up	0.330186	0.119831	0.00639872
ISC/EB-1	Ctri02329	LOC5578994|AAEL003801	Up	0.330186	0.119831	0.00639872
ISC/EB-1	Ctri01682	LOC5571495|AAEL001607	Up	0.330129	0.105915	0.00259863
ISC/EB-1	Ctri01682	LOC5571495|AAEL001607	Up	0.330129	0.105915	0.00259863
ISC/EB-1	Ctri12448	LOC5579911|AAEL001047	Up	0.330005	0.133854	0.0145971
ISC/EB-1	Ctri12448	LOC5579911|AAEL001047	Up	0.330005	0.133854	0.0145971
ISC/EB-1	Ctri10122	LOC110676232|AAEL023983	Up	0.329563	0.0213929	5.34052e-06
ISC/EB-1	Ctri10122	LOC110676232|AAEL023983	Up	0.329563	0.0213929	5.34052e-06
ISC/EB-1	Ctri07063	LOC5568708|AAEL007054	Up	0.329486	0.0653242	0.000187114
ISC/EB-1	Ctri07063	LOC5568708|AAEL007054	Up	0.329486	0.0653242	0.000187114
ISC/EB-1	Ctri06027		Up	0.327992	0.0738767	0.000454311
ISC/EB-1	Ctri06027		Up	0.327992	0.0738767	0.000454311
ISC/EB-1	Ctri02930	LOC5565637|AAEL014915	Up	0.327794	0.113803	0.00479904
ISC/EB-1	Ctri02930	LOC5565637|AAEL014915	Up	0.327794	0.113803	0.00479904
ISC/EB-1	Ctri02516	LOC5580010|AAEL009637	Up	0.32692	0.0611548	0.000452212
ISC/EB-1	Ctri02516	LOC5580010|AAEL009637	Up	0.32692	0.0611548	0.000452212
ISC/EB-1	Ctri01932	LOC5567286|AAEL005946	Up	0.32671	0.0563343	0.000231408
ISC/EB-1	Ctri01932	LOC5567286|AAEL005946	Up	0.32671	0.0563343	0.000231408
ISC/EB-1	mt_ND3		Up	0.326149	0.0387816	1.2074e-05
ISC/EB-1	mt_ND3		Up	0.326149	0.0387816	1.2074e-05
ISC/EB-1	Ctri05488		Up	0.325834	0.156102	0.035193
ISC/EB-1	Ctri05488		Up	0.325834	0.156102	0.035193
ISC/EB-1	Ctri00517	LOC5574991|-	Up	0.324503	0.0164552	4.19492e-09
ISC/EB-1	Ctri00517	LOC5574991|-	Up	0.324503	0.0164552	4.19492e-09
ISC/EB-1	Ctri11221	LOC5567587|AAEL006186	Up	0.324048	0.106593	0.00279944
ISC/EB-1	Ctri11221	LOC5567587|AAEL006186	Up	0.324048	0.106593	0.00279944
ISC/EB-1	Ctri10286	LOC5572284|AAEL001759	Up	0.323809	0.0188469	1.61436e-08
ISC/EB-1	Ctri10286	LOC5572284|AAEL001759	Up	0.323809	0.0188469	1.61436e-08
ISC/EB-1	Ctri12106	LOC5566370|AAEL005354	Up	0.322954	0.0950378	0.00260067
ISC/EB-1	Ctri12106	LOC5566370|AAEL005354	Up	0.322954	0.0950378	0.00260067
ISC/EB-1	Ctri05389	LOC5574834|AAEL011433	Up	0.322159	0.103594	0.00239952
ISC/EB-1	Ctri05389	LOC5574834|AAEL011433	Up	0.322159	0.103594	0.00239952
ISC/EB-1	Ctri08020	LOC5577750|AAEL003310	Up	0.32162	0.120577	0.0079984
ISC/EB-1	Ctri08020	LOC5577750|AAEL003310	Up	0.32162	0.120577	0.0079984
ISC/EB-1	Ctri07503	LOC5566309|AAEL005308	Up	0.320834	0.100269	0.00246379
ISC/EB-1	Ctri07503	LOC5566309|AAEL005308	Up	0.320834	0.100269	0.00246379
ISC/EB-1	Ctri04527	LOC5565279|AAEL014799	Up	0.31999	0.0942096	0.00193732
ISC/EB-1	Ctri04527	LOC5565279|AAEL014799	Up	0.31999	0.0942096	0.00193732
ISC/EB-1	Ctri09820	LOC5575242|AAEL011711	Up	0.319648	0.0221057	2.93076e-06
ISC/EB-1	Ctri09820	LOC5575242|AAEL011711	Up	0.319648	0.0221057	2.93076e-06
ISC/EB-1	Ctri09806	LOC5579060|AAEL013992	Up	0.318968	0.0940842	0.00135542
ISC/EB-1	Ctri09806	LOC5579060|AAEL013992	Up	0.318968	0.0940842	0.00135542
ISC/EB-1	Ctri05208	LOC5564516|AAEL004284	Up	0.31858	0.0590627	0.000396392
ISC/EB-1	Ctri05208	LOC5564516|AAEL004284	Up	0.31858	0.0590627	0.000396392
ISC/EB-1	Ctri04083	LOC5580036|AAEL010230	Up	0.318493	0.0578658	0.000371165
ISC/EB-1	Ctri04083	LOC5580036|AAEL010230	Up	0.318493	0.0578658	0.000371165
ISC/EB-1	Ctri01922	LOC5578927|AAEL003750	Up	0.317304	0.0274197	2.08325e-05
ISC/EB-1	Ctri01922	LOC5578927|AAEL003750	Up	0.317304	0.0274197	2.08325e-05
ISC/EB-1	Ctri05075	LOC5566909|AAEL005538	Up	0.315977	0.05868	0.000275678
ISC/EB-1	Ctri05075	LOC5566909|AAEL005538	Up	0.315977	0.05868	0.000275678
ISC/EB-1	Ctri02558	LOC5567070|AAEL005817	Up	0.315897	0.0154354	0.000145624
ISC/EB-1	Ctri02558	LOC5567070|AAEL005817	Up	0.315897	0.0154354	0.000145624
ISC/EB-1	Ctri09758		Up	0.314882	0.029794	3.2757e-05
ISC/EB-1	Ctri09758		Up	0.314882	0.029794	3.2757e-05
ISC/EB-1	Ctri02734	LOC5567616|AAEL006196	Up	0.31482	0.111662	0.00459908
ISC/EB-1	Ctri02734	LOC5567616|AAEL006196	Up	0.31482	0.111662	0.00459908
ISC/EB-1	Ctri04252	LOC5564027|AAEL014281	Up	0.313544	0.13457	0.0223955
ISC/EB-1	Ctri04252	LOC5564027|AAEL014281	Up	0.313544	0.13457	0.0223955
ISC/EB-1	Ctri12002	LOC5565962|AAEL005220	Up	0.313525	0.0167143	0.000153481
ISC/EB-1	Ctri12002	LOC5565962|AAEL005220	Up	0.313525	0.0167143	0.000153481
ISC/EB-1	Ctri08542	LOC5567848|AAEL000987	Up	0.313509	0.0174934	0.000189801
ISC/EB-1	Ctri08542	LOC5567848|AAEL000987	Up	0.313509	0.0174934	0.000189801
ISC/EB-1	Ctri01999	LOC5580166|AAEL002542	Up	0.312844	0.0707996	0.00262774
ISC/EB-1	Ctri01999	LOC5580166|AAEL002542	Up	0.312844	0.0707996	0.00262774
ISC/EB-1	Ctri09686	LOC5573990|AAEL010840	Up	0.312751	0.0616461	0.00033777
ISC/EB-1	Ctri09686	LOC5573990|AAEL010840	Up	0.312751	0.0616461	0.00033777
ISC/EB-1	Ctri05067	LOC5565869|AAEL015007	Up	0.312427	0.0950035	0.00342124
ISC/EB-1	Ctri05067	LOC5565869|AAEL015007	Up	0.312427	0.0950035	0.00342124
ISC/EB-1	Ctri01829	LOC5576003|AAEL025078	Up	0.312313	0.128641	0.014997
ISC/EB-1	Ctri01829	LOC5576003|AAEL025078	Up	0.312313	0.128641	0.014997
ISC/EB-1	Ctri08601	LOC5568110|AAEL006564	Up	0.31169	0.112125	0.00519896
ISC/EB-1	Ctri08601	LOC5568110|AAEL006564	Up	0.31169	0.112125	0.00519896
ISC/EB-1	Ctri01618	LOC5573557|AAEL022931	Up	0.311673	0.122949	0.0107978
ISC/EB-1	Ctri01618	LOC5573557|AAEL022931	Up	0.311673	0.122949	0.0107978
ISC/EB-1	Ctri01258	LOC5563880|AAEL014198	Up	0.311671	0.102909	0.00259948
ISC/EB-1	Ctri01258	LOC5563880|AAEL014198	Up	0.311671	0.102909	0.00259948
ISC/EB-1	Ctri06746	LOC5572049|AAEL000245	Up	0.310428	0.104394	0.00319936
ISC/EB-1	Ctri06746	LOC5572049|AAEL000245	Up	0.310428	0.104394	0.00319936
ISC/EB-1	Ctri05979	LOC5574369|AAEL011087	Up	0.30805	0.116141	0.0115977
ISC/EB-1	Ctri05979	LOC5574369|AAEL011087	Up	0.30805	0.116141	0.0115977
ISC/EB-1	Ctri00471		Up	0.307927	0.107522	0.0059988
ISC/EB-1	Ctri00471		Up	0.307927	0.107522	0.0059988
ISC/EB-1	Ctri00026	LOC5568408|AAEL006829	Up	0.307513	0.061684	0.000458681
ISC/EB-1	Ctri00026	LOC5568408|AAEL006829	Up	0.307513	0.061684	0.000458681
ISC/EB-1	Ctri00077	LOC5579810|AAEL005515	Up	0.306952	0.0316886	2.04975e-05
ISC/EB-1	Ctri00077	LOC5579810|AAEL005515	Up	0.306952	0.0316886	2.04975e-05
ISC/EB-1	Ctri05350	LOC5571645|AAEL001636	Up	0.305822	0.106178	0.00559888
ISC/EB-1	Ctri05350	LOC5571645|AAEL001636	Up	0.305822	0.106178	0.00559888
ISC/EB-1	Ctri10477	LOC5574109|AAEL002263	Up	0.305655	0.149675	0.0385923
ISC/EB-1	Ctri10477	LOC5574109|AAEL002263	Up	0.305655	0.149675	0.0385923
ISC/EB-1	Ctri06565	LOC5573830|AAEL010754	Up	0.305644	0.0358867	1.89676e-05
ISC/EB-1	Ctri06565	LOC5573830|AAEL010754	Up	0.305644	0.0358867	1.89676e-05
ISC/EB-1	Ctri06157		Up	0.305573	0.14036	0.029794
ISC/EB-1	Ctri06157		Up	0.305573	0.14036	0.029794
ISC/EB-1	Ctri04891	LOC5571418|AAEL009059	Up	0.304514	0.0935693	0.00321998
ISC/EB-1	Ctri04891	LOC5571418|AAEL009059	Up	0.304514	0.0935693	0.00321998
ISC/EB-1	Ctri03805	LOC5569074|AAEL001210	Up	0.3043	0.0685227	0.000563387
ISC/EB-1	Ctri03805	LOC5569074|AAEL001210	Up	0.3043	0.0685227	0.000563387
ISC/EB-1	Ctri05073	LOC5576440|AAEL005536	Up	0.303732	0.0538567	0.000143642
ISC/EB-1	Ctri05073	LOC5576440|AAEL005536	Up	0.303732	0.0538567	0.000143642
ISC/EB-1	Ctri05943	LOC5571143|AAEL008853	Up	0.303608	0.0897765	0.00248755
ISC/EB-1	Ctri05943	LOC5571143|AAEL008853	Up	0.303608	0.0897765	0.00248755
ISC/EB-1	Ctri09554	LOC5578538|AAEL013744	Up	0.303451	0.0769192	0.000890478
ISC/EB-1	Ctri09554	LOC5578538|AAEL013744	Up	0.303451	0.0769192	0.000890478
ISC/EB-1	mt_ND1		Up	0.303188	0.0505789	0.000177936
ISC/EB-1	mt_ND1		Up	0.303188	0.0505789	0.000177936
ISC/EB-1	Ctri04168	LOC5566973|AAEL005728	Up	0.301643	0.124557	0.0175965
ISC/EB-1	Ctri04168	LOC5566973|AAEL005728	Up	0.301643	0.124557	0.0175965
ISC/EB-1	Ctri12439	LOC5570243|AAEL008192	Up	0.301538	0.0188285	1.62625e-05
ISC/EB-1	Ctri12439	LOC5570243|AAEL008192	Up	0.301538	0.0188285	1.62625e-05
ISC/EB-1	Ctri12647	LOC5564297|AAEL000590	Up	0.301168	0.0945135	0.00367839
ISC/EB-1	Ctri12647	LOC5564297|AAEL000590	Up	0.301168	0.0945135	0.00367839
ISC/EB-1	Ctri05630	LOC110677764|AAEL024434	Up	0.301007	0.0166366	0.00020698
ISC/EB-1	Ctri05630	LOC110677764|AAEL024434	Up	0.301007	0.0166366	0.00020698
ISC/EB-1	Ctri02368	LOC5577498|AAEL003194	Up	0.300298	0.0596396	0.000223878
ISC/EB-1	Ctri02368	LOC5577498|AAEL003194	Up	0.300298	0.0596396	0.000223878
ISC/EB-1	Ctri06884	LOC5578343|AAEL003514	Up	0.29882	0.0935746	0.00329747
ISC/EB-1	Ctri06884	LOC5578343|AAEL003514	Up	0.29882	0.0935746	0.00329747
ISC/EB-1	Ctri10522	LOC5574542|AAEL011216	Up	0.297364	0.114683	0.0109978
ISC/EB-1	Ctri10522	LOC5574542|AAEL011216	Up	0.297364	0.114683	0.0109978
ISC/EB-1	Ctri06153	LOC5570017|AAEL000208	Up	0.296894	0.0762853	0.000888676
ISC/EB-1	Ctri06153	LOC5570017|AAEL000208	Up	0.296894	0.0762853	0.000888676
ISC/EB-1	Ctri10728	LOC5570335|AAEL019669	Up	0.296008	0.027905	1.85013e-05
ISC/EB-1	Ctri10728	LOC5570335|AAEL019669	Up	0.296008	0.027905	1.85013e-05
ISC/EB-1	Ctri00612	LOC5573407|AAEL002077	Up	0.295419	0.107579	0.00839832
ISC/EB-1	Ctri00612	LOC5573407|AAEL002077	Up	0.295419	0.107579	0.00839832
ISC/EB-1	Ctri00232		Up	0.294236	0.0571089	0.000183302
ISC/EB-1	Ctri00232		Up	0.294236	0.0571089	0.000183302
ISC/EB-1	Ctri10888	LOC110678949|AAEL022104	Up	0.291874	0.0192356	7.32419e-06
ISC/EB-1	Ctri10888	LOC110678949|AAEL022104	Up	0.291874	0.0192356	7.32419e-06
ISC/EB-1	Ctri08220	LOC5569738|AAEL007868	Up	0.291695	0.039991	5.9141e-05
ISC/EB-1	Ctri08220	LOC5569738|AAEL007868	Up	0.291695	0.039991	5.9141e-05
ISC/EB-1	Ctri06684	LOC5573827|AAEL010756	Up	0.289978	0.0163795	0.000211613
ISC/EB-1	Ctri06684	LOC5573827|AAEL010756	Up	0.289978	0.0163795	0.000211613
ISC/EB-1	Ctri09793	LOC5576079|AAEL012317	Up	0.289109	0.0962268	0.00239952
ISC/EB-1	Ctri09793	LOC5576079|AAEL012317	Up	0.289109	0.0962268	0.00239952
ISC/EB-1	Ctri10388		Up	0.288985	0.0976466	0.00359928
ISC/EB-1	Ctri10388		Up	0.288985	0.0976466	0.00359928
ISC/EB-1	Ctri08065	LOC5572090|AAEL009496	Up	0.286294	0.0161548	4.02276e-07
ISC/EB-1	Ctri08065	LOC5572090|AAEL009496	Up	0.286294	0.0161548	4.02276e-07
ISC/EB-1	Ctri04539		Up	0.286283	0.114265	0.015197
ISC/EB-1	Ctri04539		Up	0.286283	0.114265	0.015197
ISC/EB-1	Ctri00556	LOC5570653|AAEL008461	Up	0.285987	0.0794941	0.00116104
ISC/EB-1	Ctri00556	LOC5570653|AAEL008461	Up	0.285987	0.0794941	0.00116104
ISC/EB-1	Ctri01245	LOC5576540|AAEL012595	Up	0.284539	0.102967	0.00619876
ISC/EB-1	Ctri01245	LOC5576540|AAEL012595	Up	0.284539	0.102967	0.00619876
ISC/EB-1	Ctri12216	LOC110679588|-	Up	0.28453	0.0320887	4.13196e-05
ISC/EB-1	Ctri12216	LOC110679588|-	Up	0.28453	0.0320887	4.13196e-05
ISC/EB-1	Ctri05599	LOC5564477|AAEL014484	Up	0.283499	0.0638846	0.000557973
ISC/EB-1	Ctri05599	LOC5564477|AAEL014484	Up	0.283499	0.0638846	0.000557973
ISC/EB-1	Ctri04921	LOC5565771|AAEL004983	Up	0.282604	0.114533	0.0137972
ISC/EB-1	Ctri04921	LOC5565771|AAEL004983	Up	0.282604	0.114533	0.0137972
ISC/EB-1	Ctri07251	LOC110674018|-	Up	0.28241	0.0146867	0.000198139
ISC/EB-1	Ctri07251	LOC110674018|-	Up	0.28241	0.0146867	0.000198139
ISC/EB-1	Ctri10216	LOC5563585|AAEL011221	Up	0.281674	0.0597155	0.000448641
ISC/EB-1	Ctri10216	LOC5563585|AAEL011221	Up	0.281674	0.0597155	0.000448641
ISC/EB-1	Ctri03547	LOC5568090|AAEL006511	Up	0.281456	0.0204711	3.66306e-06
ISC/EB-1	Ctri03547	LOC5568090|AAEL006511	Up	0.281456	0.0204711	3.66306e-06
ISC/EB-1	Ctri10879	LOC110678950|AAEL000459	Up	0.281011	0.109041	0.0111978
ISC/EB-1	Ctri10879	LOC110678950|AAEL000459	Up	0.281011	0.109041	0.0111978
ISC/EB-1	Ctri05424	LOC5565372|AAEL004755	Up	0.27978	0.112008	0.0157968
ISC/EB-1	Ctri05424	LOC5565372|AAEL004755	Up	0.27978	0.112008	0.0157968
ISC/EB-1	Ctri10050	LOC5574333|AAEL002337	Up	0.278995	0.10592	0.00839832
ISC/EB-1	Ctri10050	LOC5574333|AAEL002337	Up	0.278995	0.10592	0.00839832
ISC/EB-1	Ctri02310	LOC5573374|AAEL010464	Up	0.278964	0.139983	0.04979
ISC/EB-1	Ctri02310	LOC5573374|AAEL010464	Up	0.278964	0.139983	0.04979
ISC/EB-1	Ctri09137	LOC110675493|AAEL028043	Up	0.278881	0.0157352	1.86656e-06
ISC/EB-1	Ctri09137	LOC110675493|AAEL028043	Up	0.278881	0.0157352	1.86656e-06
ISC/EB-1	Ctri02586	LOC5568465|AAEL006860	Up	0.277695	0.0341138	1.78427e-05
ISC/EB-1	Ctri02586	LOC5568465|AAEL006860	Up	0.277695	0.0341138	1.78427e-05
ISC/EB-1	Ctri04755	LOC5569042|AAEL007332	Up	0.277317	0.0774375	0.00116182
ISC/EB-1	Ctri04755	LOC5569042|AAEL007332	Up	0.277317	0.0774375	0.00116182
ISC/EB-1	Ctri00960	LOC5571571|AAEL009160	Up	0.277154	0.100067	0.00619876
ISC/EB-1	Ctri00960	LOC5571571|AAEL009160	Up	0.277154	0.100067	0.00619876
ISC/EB-1	Ctri06645	LOC5573067|AAEL010248	Up	0.276648	0.0994887	0.00739852
ISC/EB-1	Ctri06645	LOC5573067|AAEL010248	Up	0.276648	0.0994887	0.00739852
ISC/EB-1	Ctri08052	LOC5579114|AAEL003831	Up	0.276595	0.120951	0.0231954
ISC/EB-1	Ctri08052	LOC5579114|AAEL003831	Up	0.276595	0.120951	0.0231954
ISC/EB-1	Ctri08721	LOC5569212|AAEL019885	Up	0.276594	0.116963	0.0165967
ISC/EB-1	Ctri08721	LOC5569212|AAEL019885	Up	0.276594	0.116963	0.0165967
ISC/EB-1	Ctri05930	LOC5571158|AAEL008842	Up	0.276371	0.115395	0.0127974
ISC/EB-1	Ctri05930	LOC5571158|AAEL008842	Up	0.276371	0.115395	0.0127974
ISC/EB-1	Ctri10509	LOC5572982|AAEL001930	Up	0.276182	0.0633998	0.000804688
ISC/EB-1	Ctri10509	LOC5572982|AAEL001930	Up	0.276182	0.0633998	0.000804688
ISC/EB-1	Ctri02221	LOC110681498|AAEL023347	Up	0.275221	0.047447	5.2291e-05
ISC/EB-1	Ctri02221	LOC110681498|AAEL023347	Up	0.275221	0.047447	5.2291e-05
ISC/EB-1	Ctri02658	LOC5565159|AAEL004613	Up	0.274526	0.104361	0.00819836
ISC/EB-1	Ctri02658	LOC5565159|AAEL004613	Up	0.274526	0.104361	0.00819836
ISC/EB-1	Ctri08040	LOC5579101|AAEL003842	Up	0.274059	0.0957851	0.00539892
ISC/EB-1	Ctri08040	LOC5579101|AAEL003842	Up	0.274059	0.0957851	0.00539892
ISC/EB-1	Ctri08866	LOC5576744|AAEL024536	Up	0.269312	0.0144503	4.5454e-05
ISC/EB-1	Ctri08866	LOC5576744|AAEL024536	Up	0.269312	0.0144503	4.5454e-05
ISC/EB-1	Ctri11810	LOC5567387|AAEL006062	Up	0.268583	0.101823	0.0103979
ISC/EB-1	Ctri11810	LOC5567387|AAEL006062	Up	0.268583	0.101823	0.0103979
ISC/EB-1	Ctri05509	LOC5566398|AAEL005355	Up	0.268337	0.126575	0.0359928
ISC/EB-1	Ctri05509	LOC5566398|AAEL005355	Up	0.268337	0.126575	0.0359928
ISC/EB-1	Ctri09559	LOC5575890|AAEL002753	Up	0.268269	0.0479418	0.000358144
ISC/EB-1	Ctri09559	LOC5575890|AAEL002753	Up	0.268269	0.0479418	0.000358144
ISC/EB-1	Ctri06363	LOC5575273|AAEL011742	Up	0.265893	0.0451072	0.000130877
ISC/EB-1	Ctri06363	LOC5575273|AAEL011742	Up	0.265893	0.0451072	0.000130877
ISC/EB-1	Ctri06620	LOC5570994|AAEL008740	Up	0.265568	0.112501	0.0209958
ISC/EB-1	Ctri06620	LOC5570994|AAEL008740	Up	0.265568	0.112501	0.0209958
ISC/EB-1	Ctri05938	LOC5571150|AAEL008848	Up	0.264948	0.0448261	0.000125167
ISC/EB-1	Ctri05938	LOC5571150|AAEL008848	Up	0.264948	0.0448261	0.000125167
ISC/EB-1	Ctri11448	LOC5571093|AAEL008801	Up	0.264753	0.0357958	0.000555026
ISC/EB-1	Ctri11448	LOC5571093|AAEL008801	Up	0.264753	0.0357958	0.000555026
ISC/EB-1	Ctri05785	LOC5574485|AAEL002372	Up	0.262973	0.0151294	0.000199713
ISC/EB-1	Ctri05785	LOC5574485|AAEL002372	Up	0.262973	0.0151294	0.000199713
ISC/EB-1	Ctri06117	LOC5577026|AAEL012950	Up	0.26232	0.0896422	0.00379924
ISC/EB-1	Ctri06117	LOC5577026|AAEL012950	Up	0.26232	0.0896422	0.00379924
ISC/EB-1	Ctri05615	LOC5580260|AAEL012586	Up	0.261583	0.101249	0.00779844
ISC/EB-1	Ctri05615	LOC5580260|AAEL012586	Up	0.261583	0.101249	0.00779844
ISC/EB-1	Ctri04538	LOC5579232|-	Up	0.26131	0.126758	0.0421916
ISC/EB-1	Ctri04538	LOC5579232|-	Up	0.26131	0.126758	0.0421916
ISC/EB-1	Ctri05185	LOC5572650|AAEL001865	Up	0.261013	0.0551727	0.000186522
ISC/EB-1	Ctri05185	LOC5572650|AAEL001865	Up	0.261013	0.0551727	0.000186522
ISC/EB-1	Ctri12432	LOC5576019|AAEL012250	Up	0.260284	0.0849353	0.00319171
ISC/EB-1	Ctri12432	LOC5576019|AAEL012250	Up	0.260284	0.0849353	0.00319171
ISC/EB-1	Ctri06722	LOC5566608|AAEL000791	Up	0.260276	0.0762414	0.00161947
ISC/EB-1	Ctri06722	LOC5566608|AAEL000791	Up	0.260276	0.0762414	0.00161947
ISC/EB-1	Ctri06101	LOC5564768|AAEL004434	Up	0.259986	0.0555275	0.000488832
ISC/EB-1	Ctri06101	LOC5564768|AAEL004434	Up	0.259986	0.0555275	0.000488832
ISC/EB-1	Ctri10197	LOC5574214|AAEL024525	Up	0.259868	0.102701	0.0123975
ISC/EB-1	Ctri10197	LOC5574214|AAEL024525	Up	0.259868	0.102701	0.0123975
ISC/EB-1	Ctri03649		Up	0.25889	0.0872168	0.00379924
ISC/EB-1	Ctri03649		Up	0.25889	0.0872168	0.00379924
ISC/EB-1	Ctri05779	LOC5574496|AAEL002399	Up	0.258832	0.0763559	0.00260087
ISC/EB-1	Ctri05779	LOC5574496|AAEL002399	Up	0.258832	0.0763559	0.00260087
ISC/EB-1	Ctri02578		Up	0.258099	0.0367372	0.000653037
ISC/EB-1	Ctri02578		Up	0.258099	0.0367372	0.000653037
ISC/EB-1	Ctri12722	LOC5579027|AAEL013966	Up	0.25807	0.102446	0.0119976
ISC/EB-1	Ctri12722	LOC5579027|AAEL013966	Up	0.25807	0.102446	0.0119976
ISC/EB-1	Ctri12332	LOC5571414|AAEL009041	Up	0.257442	0.120629	0.0353929
ISC/EB-1	Ctri12332	LOC5571414|AAEL009041	Up	0.257442	0.120629	0.0353929
ISC/EB-1	Ctri03645		Up	0.257256	0.0859741	0.00239952
ISC/EB-1	Ctri03645		Up	0.257256	0.0859741	0.00239952
ISC/EB-1	Ctri03531	LOC110680422|AAEL006518	Up	0.257166	0.110639	0.0223955
ISC/EB-1	Ctri03531	LOC110680422|AAEL006518	Up	0.257166	0.110639	0.0223955
ISC/EB-1	Ctri10860	LOC5577355|AAEL000458	Up	0.256903	0.0680487	0.00109688
ISC/EB-1	Ctri10860	LOC5577355|AAEL000458	Up	0.256903	0.0680487	0.00109688
ISC/EB-1	Ctri09091	LOC5574844|AAEL011447	Up	0.25642	0.0158576	0.000238993
ISC/EB-1	Ctri09091	LOC5574844|AAEL011447	Up	0.25642	0.0158576	0.000238993
ISC/EB-1	Ctri07148	LOC5568521|AAEL006928	Up	0.256093	0.0798907	0.00307539
ISC/EB-1	Ctri07148	LOC5568521|AAEL006928	Up	0.256093	0.0798907	0.00307539
ISC/EB-1	Ctri10717	LOC5575914|AAEL012175	Up	0.256042	0.0306079	8.65796e-05
ISC/EB-1	Ctri10717	LOC5575914|AAEL012175	Up	0.256042	0.0306079	8.65796e-05
ISC/EB-1	Ctri00076		Up	0.255357	0.0769934	0.00219269
ISC/EB-1	Ctri00076		Up	0.255357	0.0769934	0.00219269
ISC/EB-1	Ctri00029	LOC5570648|AAEL008468	Up	0.255087	0.120505	0.0361928
ISC/EB-1	Ctri00029	LOC5570648|AAEL008468	Up	0.255087	0.120505	0.0361928
ISC/EB-1	Ctri06081	LOC5577034|AAEL012944	Up	0.254715	0.0163728	0.000228165
ISC/EB-1	Ctri06081	LOC5577034|AAEL012944	Up	0.254715	0.0163728	0.000228165
ISC/EB-1	Ctri09257	LOC5574704|AAEL011340	Up	0.254124	0.126634	0.0473905
ISC/EB-1	Ctri09257	LOC5574704|AAEL011340	Up	0.254124	0.126634	0.0473905
ISC/EB-1	Ctri12143	LOC5574394|AAEL011114	Up	0.253688	0.11613	0.0309938
ISC/EB-1	Ctri12143	LOC5574394|AAEL011114	Up	0.253688	0.11613	0.0309938
ISC/EB-1	Ctri11166	LOC5567329|AAEL005997	Up	0.253673	0.0678912	0.00140523
ISC/EB-1	Ctri11166	LOC5567329|AAEL005997	Up	0.253673	0.0678912	0.00140523
ISC/EB-1	Ctri08561	LOC5568436|AAEL012661	Up	0.252877	0.0482354	0.00149853
ISC/EB-1	Ctri08561	LOC5568436|AAEL012661	Up	0.252877	0.0482354	0.00149853
ISC/EB-1	Ctri08492	LOC5570277|AAEL008195	Up	0.25283	0.0822423	0.0029994
ISC/EB-1	Ctri08492	LOC5570277|AAEL008195	Up	0.25283	0.0822423	0.0029994
ISC/EB-1	Ctri04353	LOC5573948|AAEL002183	Up	0.248381	0.076376	0.0029454
ISC/EB-1	Ctri04353	LOC5573948|AAEL002183	Up	0.248381	0.076376	0.0029454
ISC/EB-1	Ctri01235	LOC5567660|AAEL012740	Up	0.24782	0.0182456	0.000290046
ISC/EB-1	Ctri01235	LOC5567660|AAEL012740	Up	0.24782	0.0182456	0.000290046
ISC/EB-1	Ctri06115	LOC5564798|AAEL004423	Up	0.244934	0.0510782	0.000282365
ISC/EB-1	Ctri06115	LOC5564798|AAEL004423	Up	0.244934	0.0510782	0.000282365
ISC/EB-1	Ctri10964	LOC5567163|AAEL005901	Up	0.243787	0.015956	0.000188366
ISC/EB-1	Ctri10964	LOC5567163|AAEL005901	Up	0.243787	0.015956	0.000188366
ISC/EB-1	Ctri12426	LOC5573976|AAEL010814	Up	0.243483	0.100364	0.0157968
ISC/EB-1	Ctri12426	LOC5573976|AAEL010814	Up	0.243483	0.100364	0.0157968
ISC/EB-1	Ctri01867	LOC23687841|AAEL017421	Up	0.243415	0.0698369	0.00156419
ISC/EB-1	Ctri01867	LOC23687841|AAEL017421	Up	0.243415	0.0698369	0.00156419
ISC/EB-1	Ctri12531	LOC5576658|AAEL012681	Up	0.243331	0.0296316	2.56894e-05
ISC/EB-1	Ctri12531	LOC5576658|AAEL012681	Up	0.243331	0.0296316	2.56894e-05
ISC/EB-1	Ctri10017	LOC5569595|AAEL001245	Up	0.241876	0.0843061	0.00559888
ISC/EB-1	Ctri10017	LOC5569595|AAEL001245	Up	0.241876	0.0843061	0.00559888
ISC/EB-1	Ctri02189	LOC5577406|AAEL003179	Up	0.240497	0.0936103	0.00979804
ISC/EB-1	Ctri02189	LOC5577406|AAEL003179	Up	0.240497	0.0936103	0.00979804
ISC/EB-1	Ctri05535	LOC5564492|AAEL004294	Up	0.235386	0.078809	0.00319936
ISC/EB-1	Ctri05535	LOC5564492|AAEL004294	Up	0.235386	0.078809	0.00319936
ISC/EB-1	Ctri06371		Up	0.235358	0.03833	0.000123195
ISC/EB-1	Ctri06371		Up	0.235358	0.03833	0.000123195
ISC/EB-1	Ctri04124	LOC5567961|AAEL006420	Up	0.235176	0.110439	0.0385923
ISC/EB-1	Ctri04124	LOC5567961|AAEL006420	Up	0.235176	0.110439	0.0385923
ISC/EB-1	Ctri07691	LOC5577280|AAEL013132	Up	0.234741	0.111877	0.0343931
ISC/EB-1	Ctri07691	LOC5577280|AAEL013132	Up	0.234741	0.111877	0.0343931
ISC/EB-1	Ctri05640	LOC5570914|AAEL001479	Up	0.23427	0.101467	0.0235953
ISC/EB-1	Ctri05640	LOC5570914|AAEL001479	Up	0.23427	0.101467	0.0235953
ISC/EB-1	Ctri06255	LOC5579041|AAEL013989	Up	0.233925	0.057754	0.00110532
ISC/EB-1	Ctri06255	LOC5579041|AAEL013989	Up	0.233925	0.057754	0.00110532
ISC/EB-1	Ctri06381	LOC5575223|AAEL010608	Up	0.23384	0.0894971	0.00939812
ISC/EB-1	Ctri06381	LOC5575223|AAEL010608	Up	0.23384	0.0894971	0.00939812
ISC/EB-1	Ctri07558	LOC5580239|AAEL012326	Up	0.231186	0.0303919	0.0001834
ISC/EB-1	Ctri07558	LOC5580239|AAEL012326	Up	0.231186	0.0303919	0.0001834
ISC/EB-1	Ctri06790	LOC5578388|AAEL013675	Up	0.228994	0.0386403	0.000823878
ISC/EB-1	Ctri06790	LOC5578388|AAEL013675	Up	0.228994	0.0386403	0.000823878
ISC/EB-1	Ctri09792	LOC5576082|AAEL012312	Up	0.22827	0.0788081	0.00459908
ISC/EB-1	Ctri09792	LOC5576082|AAEL012312	Up	0.22827	0.0788081	0.00459908
ISC/EB-1	Ctri05559	LOC5571664|AAEL024228	Up	0.228128	0.044884	0.000267152
ISC/EB-1	Ctri05559	LOC5571664|AAEL024228	Up	0.228128	0.044884	0.000267152
ISC/EB-1	Ctri07330	LOC5567222|AAEL019724	Up	0.228017	0.09592	0.0181964
ISC/EB-1	Ctri07330	LOC5567222|AAEL019724	Up	0.228017	0.09592	0.0181964
ISC/EB-1	Ctri00147	LOC5575831|AAEL012099	Up	0.22689	0.0586855	0.000782255
ISC/EB-1	Ctri00147	LOC5575831|AAEL012099	Up	0.22689	0.0586855	0.000782255
ISC/EB-1	Ctri00433	LOC5578732|AAEL024616	Up	0.226744	0.111669	0.0459908
ISC/EB-1	Ctri00433	LOC5578732|AAEL024616	Up	0.226744	0.111669	0.0459908
ISC/EB-1	Ctri06641	LOC5573060|AAEL010244	Up	0.225271	0.0575877	0.00104268
ISC/EB-1	Ctri06641	LOC5573060|AAEL010244	Up	0.225271	0.0575877	0.00104268
ISC/EB-1	Ctri10124	LOC23687495|AAEL017075	Up	0.225209	0.0454077	0.000328193
ISC/EB-1	Ctri10124	LOC23687495|AAEL017075	Up	0.225209	0.0454077	0.000328193
ISC/EB-1	Ctri11978	LOC5580273|AAEL003009	Up	0.224612	0.0921821	0.015197
ISC/EB-1	Ctri11978	LOC5580273|AAEL003009	Up	0.224612	0.0921821	0.015197
ISC/EB-1	Ctri00709		Up	0.224427	0.0505415	0.000791566
ISC/EB-1	Ctri00709		Up	0.224427	0.0505415	0.000791566
ISC/EB-1	Ctri04200	LOC5572478|AAEL009808	Up	0.224301	0.0837341	0.00819836
ISC/EB-1	Ctri04200	LOC5572478|AAEL009808	Up	0.224301	0.0837341	0.00819836
ISC/EB-1	Ctri03172	LOC5575648|AAEL014265	Up	0.224153	0.096841	0.0233953
ISC/EB-1	Ctri03172	LOC5575648|AAEL014265	Up	0.224153	0.096841	0.0233953
ISC/EB-1	Ctri05618	LOC5580259|AAEL012585	Up	0.223485	0.0167745	1.09752e-07
ISC/EB-1	Ctri05618	LOC5580259|AAEL012585	Up	0.223485	0.0167745	1.09752e-07
ISC/EB-1	Ctri08791	LOC5573238|AAEL010330	Up	0.223425	0.0640511	0.00117679
ISC/EB-1	Ctri08791	LOC5573238|AAEL010330	Up	0.223425	0.0640511	0.00117679
ISC/EB-1	Ctri06888	LOC5576223|AAEL002825	Up	0.222752	0.063064	0.00192947
ISC/EB-1	Ctri06888	LOC5576223|AAEL002825	Up	0.222752	0.063064	0.00192947
ISC/EB-1	Ctri04992	LOC5569863|AAEL007945	Up	0.222587	0.0365208	5.71098e-05
ISC/EB-1	Ctri04992	LOC5569863|AAEL007945	Up	0.222587	0.0365208	5.71098e-05
ISC/EB-1	Ctri12384	LOC5568526|AAEL006946	Up	0.22247	0.0643603	0.00151663
ISC/EB-1	Ctri12384	LOC5568526|AAEL006946	Up	0.22247	0.0643603	0.00151663
ISC/EB-1	Ctri06762	LOC5574553|-	Up	0.22181	0.0898339	0.0131974
ISC/EB-1	Ctri06762	LOC5574553|-	Up	0.22181	0.0898339	0.0131974
ISC/EB-1	Ctri03546	LOC5568089|AAEL006519	Up	0.221747	0.114804	0.0485903
ISC/EB-1	Ctri03546	LOC5568089|AAEL006519	Up	0.221747	0.114804	0.0485903
ISC/EB-1	Ctri07884	LOC110681388|-	Up	0.220138	0.0734871	0.00339932
ISC/EB-1	Ctri07884	LOC110681388|-	Up	0.220138	0.0734871	0.00339932
ISC/EB-1	Ctri09500	LOC5577291|AAEL013144	Up	0.220088	0.034758	0.000235493
ISC/EB-1	Ctri09500	LOC5577291|AAEL013144	Up	0.220088	0.034758	0.000235493
ISC/EB-1	Ctri05481		Up	0.219678	0.0702832	0.00559435
ISC/EB-1	Ctri05481		Up	0.219678	0.0702832	0.00559435
ISC/EB-1	Ctri12498	LOC5579021|AAEL013960	Up	0.219303	0.0762569	0.00379924
ISC/EB-1	Ctri12498	LOC5579021|AAEL013960	Up	0.219303	0.0762569	0.00379924
ISC/EB-1	Ctri09157		Up	0.217608	0.109248	0.0437912
ISC/EB-1	Ctri09157		Up	0.217608	0.109248	0.0437912
ISC/EB-1	Ctri00091	LOC5575828|AAEL012095	Up	0.216883	0.0990982	0.0283943
ISC/EB-1	Ctri00091	LOC5575828|AAEL012095	Up	0.216883	0.0990982	0.0283943
ISC/EB-1	Ctri07971	LOC5571609|AAEL009201	Up	0.216231	0.0530826	0.00267006
ISC/EB-1	Ctri07971	LOC5571609|AAEL009201	Up	0.216231	0.0530826	0.00267006
ISC/EB-1	Ctri03808	LOC5569076|AAEL001216	Up	0.215695	0.0454579	0.000373669
ISC/EB-1	Ctri03808	LOC5569076|AAEL001216	Up	0.215695	0.0454579	0.000373669
ISC/EB-1	Ctri05470	LOC5580329|AAEL013069	Up	0.215344	0.0229058	3.97926e-05
ISC/EB-1	Ctri05470	LOC5580329|AAEL013069	Up	0.215344	0.0229058	3.97926e-05
ISC/EB-1	Ctri11685	LOC5570159|AAEL008131	Up	0.214318	0.0966824	0.0271946
ISC/EB-1	Ctri11685	LOC5570159|AAEL008131	Up	0.214318	0.0966824	0.0271946
ISC/EB-1	Ctri10999	LOC5568658|AAEL007001	Up	0.214303	0.0995904	0.029994
ISC/EB-1	Ctri10999	LOC5568658|AAEL007001	Up	0.214303	0.0995904	0.029994
ISC/EB-1	Ctri10247	LOC110680939|AAEL004175	Up	0.213497	0.0148343	0.000286149
ISC/EB-1	Ctri10247	LOC110680939|AAEL004175	Up	0.213497	0.0148343	0.000286149
ISC/EB-1	Ctri05171	LOC5577113|AAEL008697	Up	0.213295	0.0327827	8.83186e-05
ISC/EB-1	Ctri05171	LOC5577113|AAEL008697	Up	0.213295	0.0327827	8.83186e-05
ISC/EB-1	Ctri12176	LOC5568150|AAEL006577	Up	0.212724	0.0645217	0.00219114
ISC/EB-1	Ctri12176	LOC5568150|AAEL006577	Up	0.212724	0.0645217	0.00219114
ISC/EB-1	Ctri06896	LOC5576215|AAEL002832	Up	0.211602	0.0139819	0.000327644
ISC/EB-1	Ctri06896	LOC5576215|AAEL002832	Up	0.211602	0.0139819	0.000327644
ISC/EB-1	Ctri00040	LOC5566772|AAEL005629	Up	0.21139	0.0146069	0.000166392
ISC/EB-1	Ctri00040	LOC5566772|AAEL005629	Up	0.21139	0.0146069	0.000166392
ISC/EB-1	Ctri00832	LOC5574648|AAEL011288	Up	0.211323	0.0231219	1.2614e-05
ISC/EB-1	Ctri00832	LOC5574648|AAEL011288	Up	0.211323	0.0231219	1.2614e-05
ISC/EB-1	Ctri05866	LOC5580330|AAEL013071	Up	0.20976	0.0700449	0.00359928
ISC/EB-1	Ctri05866	LOC5580330|AAEL013071	Up	0.20976	0.0700449	0.00359928
ISC/EB-1	Ctri05619	LOC5576642|AAEL012671	Up	0.20976	0.0309744	0.000178638
ISC/EB-1	Ctri05619	LOC5576642|AAEL012671	Up	0.20976	0.0309744	0.000178638
ISC/EB-1	Ctri09347	LOC5579263|AAEL011873	Up	0.2092	0.0721767	0.00379924
ISC/EB-1	Ctri09347	LOC5579263|AAEL011873	Up	0.2092	0.0721767	0.00379924
ISC/EB-1	Ctri12785		Up	0.208664	0.0624422	0.00114121
ISC/EB-1	Ctri12785		Up	0.208664	0.0624422	0.00114121
ISC/EB-1	Ctri03005	LOC5565629|AAEL014913	Up	0.208506	0.0424447	0.000274658
ISC/EB-1	Ctri03005	LOC5565629|AAEL014913	Up	0.208506	0.0424447	0.000274658
ISC/EB-1	Ctri11636	LOC5563654|AAEL000091	Up	0.208165	0.105582	0.0475905
ISC/EB-1	Ctri11636	LOC5563654|AAEL000091	Up	0.208165	0.105582	0.0475905
ISC/EB-1	Ctri09370	LOC5576420|AAEL012507	Up	0.207159	0.100493	0.0393921
ISC/EB-1	Ctri09370	LOC5576420|AAEL012507	Up	0.207159	0.100493	0.0393921
ISC/EB-1	Ctri11990	LOC5564636|AAEL004378	Up	0.206806	0.0313952	0.000166752
ISC/EB-1	Ctri11990	LOC5564636|AAEL004378	Up	0.206806	0.0313952	0.000166752
ISC/EB-1	Ctri12358	LOC5579902|AAEL001044	Up	0.206447	0.0872451	0.0169966
ISC/EB-1	Ctri12358	LOC5579902|AAEL001044	Up	0.206447	0.0872451	0.0169966
ISC/EB-1	Ctri08036	LOC5577478|AAEL013221	Up	0.206182	0.0169323	8.98017e-06
ISC/EB-1	Ctri08036	LOC5577478|AAEL013221	Up	0.206182	0.0169323	8.98017e-06
ISC/EB-1	Ctri02724	LOC5565083|AAEL014717	Up	0.20485	0.0995586	0.0459908
ISC/EB-1	Ctri02724	LOC5565083|AAEL014717	Up	0.20485	0.0995586	0.0459908
ISC/EB-1	Ctri04657	LOC5567253|AAEL005926	Up	0.204668	0.0595766	0.00222163
ISC/EB-1	Ctri04657	LOC5567253|AAEL005926	Up	0.204668	0.0595766	0.00222163
ISC/EB-1	Ctri10642		Up	0.203641	0.053075	0.000980171
ISC/EB-1	Ctri10642		Up	0.203641	0.053075	0.000980171
ISC/EB-1	Ctri00605	LOC5573413|AAEL002047	Up	0.20153	0.0146119	0.00034519
ISC/EB-1	Ctri00605	LOC5573413|AAEL002047	Up	0.20153	0.0146119	0.00034519
ISC/EB-1	Ctri02357	LOC5572735|AAEL010012	Up	0.201036	0.0971333	0.0415917
ISC/EB-1	Ctri02357	LOC5572735|AAEL010012	Up	0.201036	0.0971333	0.0415917
ISC/EB-1	Ctri06432	LOC5569547|AAEL007718	Up	0.200573	0.0516833	0.00291229
ISC/EB-1	Ctri06432	LOC5569547|AAEL007718	Up	0.200573	0.0516833	0.00291229
ISC/EB-1	Ctri12190	LOC5574515|AAEL019717	Up	0.200073	0.0281974	4.30595e-05
ISC/EB-1	Ctri12190	LOC5574515|AAEL019717	Up	0.200073	0.0281974	4.30595e-05
ISC/EB-1	Ctri06403	LOC5572992|AAEL001952	Up	0.198811	0.0761266	0.0105979
ISC/EB-1	Ctri06403	LOC5572992|AAEL001952	Up	0.198811	0.0761266	0.0105979
ISC/EB-1	Ctri02246		Up	0.197868	0.0924474	0.0323935
ISC/EB-1	Ctri02246		Up	0.197868	0.0924474	0.0323935
ISC/EB-1	Ctri05888	LOC5578155|AAEL013533	Up	0.197767	0.0163981	0.000250076
ISC/EB-1	Ctri05888	LOC5578155|AAEL013533	Up	0.197767	0.0163981	0.000250076
ISC/EB-1	Ctri11246	LOC5574866|AAEL011471	Up	0.197672	0.0145452	0.000376652
ISC/EB-1	Ctri11246	LOC5574866|AAEL011471	Up	0.197672	0.0145452	0.000376652
ISC/EB-1	Ctri06548	LOC23687867|AAEL017447	Up	0.19712	0.0901346	0.0283943
ISC/EB-1	Ctri06548	LOC23687867|AAEL017447	Up	0.19712	0.0901346	0.0283943
ISC/EB-1	Ctri06913		Up	0.193849	0.0393909	0.000107138
ISC/EB-1	Ctri06913		Up	0.193849	0.0393909	0.000107138
ISC/EB-1	Ctri10647	LOC5572195|AAEL014715	Up	0.193714	0.0711983	0.00779844
ISC/EB-1	Ctri10647	LOC5572195|AAEL014715	Up	0.193714	0.0711983	0.00779844
ISC/EB-1	Ctri06326	LOC5573744|AAEL019937	Up	0.193508	0.0304913	0.000469361
ISC/EB-1	Ctri06326	LOC5573744|AAEL019937	Up	0.193508	0.0304913	0.000469361
ISC/EB-1	Ctri08825	LOC5568471|AAEL006885	Up	0.192767	0.0238704	1.37745e-05
ISC/EB-1	Ctri08825	LOC5568471|AAEL006885	Up	0.192767	0.0238704	1.37745e-05
ISC/EB-1	Ctri05186	LOC5572651|AAEL001864	Up	0.192736	0.0865426	0.0271946
ISC/EB-1	Ctri05186	LOC5572651|AAEL001864	Up	0.192736	0.0865426	0.0271946
ISC/EB-1	Ctri02832	LOC5565148|AAEL004620	Up	0.191731	0.0827843	0.0203959
ISC/EB-1	Ctri02832	LOC5565148|AAEL004620	Up	0.191731	0.0827843	0.0203959
ISC/EB-1	Ctri03493	LOC5567332|AAEL022793	Up	0.19154	0.0884722	0.0303939
ISC/EB-1	Ctri03493	LOC5567332|AAEL022793	Up	0.19154	0.0884722	0.0303939
ISC/EB-1	Ctri01107	LOC5580070|AAEL002160	Up	0.190028	0.0823303	0.0237952
ISC/EB-1	Ctri01107	LOC5580070|AAEL002160	Up	0.190028	0.0823303	0.0237952
ISC/EB-1	Ctri11971	LOC5580278|AAEL003011	Up	0.18964	0.0697996	0.004999
ISC/EB-1	Ctri11971	LOC5580278|AAEL003011	Up	0.18964	0.0697996	0.004999
ISC/EB-1	Ctri11552	LOC5566843|AAEL000823	Up	0.187152	0.0154643	0.000302429
ISC/EB-1	Ctri11552	LOC5566843|AAEL000823	Up	0.187152	0.0154643	0.000302429
ISC/EB-1	Ctri05371		Up	0.186063	0.016139	0.000388561
ISC/EB-1	Ctri05371		Up	0.186063	0.016139	0.000388561
ISC/EB-1	Ctri01904	LOC5568284|AAEL006711	Up	0.184416	0.0905082	0.0373925
ISC/EB-1	Ctri01904	LOC5568284|AAEL006711	Up	0.184416	0.0905082	0.0373925
ISC/EB-1	Ctri01809	LOC5569674|AAEL007820	Up	0.183634	0.0790954	0.0193961
ISC/EB-1	Ctri01809	LOC5569674|AAEL007820	Up	0.183634	0.0790954	0.0193961
ISC/EB-1	Ctri06213		Up	0.183544	0.0844116	0.0305939
ISC/EB-1	Ctri06213		Up	0.183544	0.0844116	0.0305939
ISC/EB-1	Ctri08704	LOC23687936|AAEL017516	Up	0.182685	0.016663	0.00049087
ISC/EB-1	Ctri08704	LOC23687936|AAEL017516	Up	0.182685	0.016663	0.00049087
ISC/EB-1	Ctri05624	LOC5569338|AAEL007546	Up	0.182587	0.0717765	0.0089982
ISC/EB-1	Ctri05624	LOC5569338|AAEL007546	Up	0.182587	0.0717765	0.0089982
ISC/EB-1	Ctri06516	LOC5569539|AAEL007713	Up	0.18143	0.0742046	0.0169966
ISC/EB-1	Ctri06516	LOC5569539|AAEL007713	Up	0.18143	0.0742046	0.0169966
ISC/EB-1	Ctri04689	LOC5578313|AAEL013625	Up	0.181194	0.0150687	6.76983e-06
ISC/EB-1	Ctri04689	LOC5578313|AAEL013625	Up	0.181194	0.0150687	6.76983e-06
ISC/EB-1	Ctri04116		Up	0.180955	0.0154165	0.000499414
ISC/EB-1	Ctri04116		Up	0.180955	0.0154165	0.000499414
ISC/EB-1	Ctri11545	LOC110678498|-	Up	0.178647	0.0535878	0.00259466
ISC/EB-1	Ctri11545	LOC110678498|-	Up	0.178647	0.0535878	0.00259466
ISC/EB-1	Ctri11632	LOC5563646|AAEL021083	Up	0.178447	0.0181514	2.12423e-06
ISC/EB-1	Ctri11632	LOC5563646|AAEL021083	Up	0.178447	0.0181514	2.12423e-06
ISC/EB-1	Ctri08350	LOC5564126|-	Up	0.177305	0.0478014	0.00245824
ISC/EB-1	Ctri08350	LOC5564126|-	Up	0.177305	0.0478014	0.00245824
ISC/EB-1	Ctri12525	LOC5577996|AAEL003396	Up	0.176869	0.0155106	0.000266172
ISC/EB-1	Ctri12525	LOC5577996|AAEL003396	Up	0.176869	0.0155106	0.000266172
ISC/EB-1	Ctri01907	LOC5568279|AAEL006713	Up	0.176122	0.0740445	0.0191962
ISC/EB-1	Ctri01907	LOC5568279|AAEL006713	Up	0.176122	0.0740445	0.0191962
ISC/EB-1	Ctri10575	LOC5574338|AAEL002334	Up	0.17283	0.0387592	0.000510298
ISC/EB-1	Ctri10575	LOC5574338|AAEL002334	Up	0.17283	0.0387592	0.000510298
ISC/EB-1	Ctri01528	LOC5570108|AAEL020238	Up	0.172247	0.0182043	0.000578745
ISC/EB-1	Ctri01528	LOC5570108|AAEL020238	Up	0.172247	0.0182043	0.000578745
ISC/EB-1	Ctri05751	LOC5573851|AAEL010777	Up	0.171342	0.0252866	4.91996e-05
ISC/EB-1	Ctri05751	LOC5573851|AAEL010777	Up	0.171342	0.0252866	4.91996e-05
ISC/EB-1	Ctri01831	LOC5576008|AAEL012237	Up	0.169849	0.0690036	0.0143971
ISC/EB-1	Ctri01831	LOC5576008|AAEL012237	Up	0.169849	0.0690036	0.0143971
ISC/EB-1	Ctri12677	LOC5570318|AAEL008257	Up	0.169062	0.0531488	0.00311478
ISC/EB-1	Ctri12677	LOC5570318|AAEL008257	Up	0.169062	0.0531488	0.00311478
ISC/EB-1	Ctri09774	LOC5571387|AAEL009026	Up	0.16728	0.0675114	0.0137972
ISC/EB-1	Ctri09774	LOC5571387|AAEL009026	Up	0.16728	0.0675114	0.0137972
ISC/EB-1	Ctri07749		Up	0.166655	0.0154297	7.18957e-07
ISC/EB-1	Ctri07749		Up	0.166655	0.0154297	7.18957e-07
ISC/EB-1	Ctri05951	LOC5577719|AAEL013353	Up	0.165675	0.0240111	3.07667e-05
ISC/EB-1	Ctri05951	LOC5577719|AAEL013353	Up	0.165675	0.0240111	3.07667e-05
ISC/EB-1	Ctri05865	LOC5580331|AAEL013074	Up	0.160866	0.0594865	0.00619876
ISC/EB-1	Ctri05865	LOC5580331|AAEL013074	Up	0.160866	0.0594865	0.00619876
ISC/EB-1	Ctri11140	LOC5573879|AAEL010801	Up	0.157984	0.038353	0.00230641
ISC/EB-1	Ctri11140	LOC5573879|AAEL010801	Up	0.157984	0.038353	0.00230641
ISC/EB-1	Ctri11093	LOC5578459|AAEL000486	Up	0.156332	0.0441982	0.00191442
ISC/EB-1	Ctri11093	LOC5578459|AAEL000486	Up	0.156332	0.0441982	0.00191442
ISC/EB-1	Ctri06926	LOC5576214|AAEL002827	Up	0.156176	0.036069	0.00214003
ISC/EB-1	Ctri06926	LOC5576214|AAEL002827	Up	0.156176	0.036069	0.00214003
ISC/EB-1	Ctri08582	LOC5569443|AAEL001232	Up	0.153003	0.0502241	0.00278147
ISC/EB-1	Ctri08582	LOC5569443|AAEL001232	Up	0.153003	0.0502241	0.00278147
ISC/EB-1	Ctri03897	LOC5565878|AAEL000679	Up	0.151805	0.0613754	0.0123975
ISC/EB-1	Ctri03897	LOC5565878|AAEL000679	Up	0.151805	0.0613754	0.0123975
ISC/EB-1	Ctri09488	LOC5565544|AAEL004855	Up	0.146999	0.0158304	3.7664e-05
ISC/EB-1	Ctri09488	LOC5565544|AAEL004855	Up	0.146999	0.0158304	3.7664e-05
ISC/EB-1	Ctri12675	LOC5566684|AAEL005567	Up	0.146994	0.049485	0.00279944
ISC/EB-1	Ctri12675	LOC5566684|AAEL005567	Up	0.146994	0.049485	0.00279944
ISC/EB-1	Ctri08921	LOC5570678|AAEL008473	Up	0.14644	0.0726263	0.0443911
ISC/EB-1	Ctri08921	LOC5570678|AAEL008473	Up	0.14644	0.0726263	0.0443911
ISC/EB-1	Ctri12202	LOC5563786|AAEL003942	Up	0.145771	0.0176591	0.000396229
ISC/EB-1	Ctri12202	LOC5563786|AAEL003942	Up	0.145771	0.0176591	0.000396229
ISC/EB-1	Ctri01634	LOC5579199|AAEL014039	Up	0.14413	0.0316373	0.00034392
ISC/EB-1	Ctri01634	LOC5579199|AAEL014039	Up	0.14413	0.0316373	0.00034392
ISC/EB-1	Ctri07869	LOC5571930|AAEL009389	Up	0.1427	0.0704102	0.045191
ISC/EB-1	Ctri07869	LOC5571930|AAEL009389	Up	0.1427	0.0704102	0.045191
ISC/EB-1	Ctri00222	LOC5567565|AAEL006169	Up	0.140669	0.0384388	0.00114975
ISC/EB-1	Ctri00222	LOC5567565|AAEL006169	Up	0.140669	0.0384388	0.00114975
ISC/EB-1	Ctri02562		Up	0.140479	0.0460416	0.00319936
ISC/EB-1	Ctri02562		Up	0.140479	0.0460416	0.00319936
ISC/EB-1	Ctri10294	LOC5576046|AAEL014932	Up	0.137218	0.0212151	0.000255518
ISC/EB-1	Ctri10294	LOC5576046|AAEL014932	Up	0.137218	0.0212151	0.000255518
ISC/EB-1	Ctri12763	LOC5575372|AAEL011776	Up	0.135635	0.0429927	0.00270401
ISC/EB-1	Ctri12763	LOC5575372|AAEL011776	Up	0.135635	0.0429927	0.00270401
ISC/EB-1	Ctri05122	LOC5578796|AAEL003675	Up	0.134414	0.0454688	0.0039992
ISC/EB-1	Ctri05122	LOC5578796|AAEL003675	Up	0.134414	0.0454688	0.0039992
ISC/EB-1	Ctri11332	LOC5572968|AAEL010168	Up	0.133319	0.0208306	0.000242422
ISC/EB-1	Ctri11332	LOC5572968|AAEL010168	Up	0.133319	0.0208306	0.000242422
ISC/EB-1	Ctri00160	LOC5564713|AAEL014583	Up	0.131186	0.0132458	0.000423761
ISC/EB-1	Ctri00160	LOC5564713|AAEL014583	Up	0.131186	0.0132458	0.000423761
ISC/EB-1	Ctri12440	LOC5570244|AAEL008188	Up	0.131084	0.0155503	0.000730367
ISC/EB-1	Ctri12440	LOC5570244|AAEL008188	Up	0.131084	0.0155503	0.000730367
ISC/EB-1	Ctri07252	LOC5564581|AAEL004347	Up	0.127486	0.0548213	0.0175965
ISC/EB-1	Ctri07252	LOC5564581|AAEL004347	Up	0.127486	0.0548213	0.0175965
ISC/EB-1	Ctri08420	LOC5573211|AAEL010318	Up	0.12733	0.0232773	0.0003264
ISC/EB-1	Ctri08420	LOC5573211|AAEL010318	Up	0.12733	0.0232773	0.0003264
ISC/EB-1	Ctri12181	LOC5573963|AAEL010826	Up	0.126822	0.0586104	0.0317936
ISC/EB-1	Ctri12181	LOC5573963|AAEL010826	Up	0.126822	0.0586104	0.0317936
ISC/EB-1	Ctri10827	LOC5574167|AAEL010977	Up	0.126192	0.0258209	0.00208574
ISC/EB-1	Ctri10827	LOC5574167|AAEL010977	Up	0.126192	0.0258209	0.00208574
ISC/EB-1	Ctri09348	LOC5575492|AAEL011871	Up	0.119476	0.044361	0.0079984
ISC/EB-1	Ctri09348	LOC5575492|AAEL011871	Up	0.119476	0.044361	0.0079984
ISC/EB-1	Ctri06145	LOC5570007|AAEL000175	Up	0.118962	0.0466925	0.00859828
ISC/EB-1	Ctri06145	LOC5570007|AAEL000175	Up	0.118962	0.0466925	0.00859828
ISC/EB-1	Ctri12633	LOC5570139|AAEL008103	Up	0.115277	0.0143966	0.00079094
ISC/EB-1	Ctri12633	LOC5570139|AAEL008103	Up	0.115277	0.0143966	0.00079094
ISC/EB-1	Ctri07021	LOC5575085|AAEL011641	Up	0.111553	0.0524435	0.0325935
ISC/EB-1	Ctri07021	LOC5575085|AAEL011641	Up	0.111553	0.0524435	0.0325935
ISC/EB-1	Ctri08470	LOC5570951|AAEL008674	Up	0.111549	0.0523786	0.0355929
ISC/EB-1	Ctri08470	LOC5570951|AAEL008674	Up	0.111549	0.0523786	0.0355929
ISC/EB-1	Ctri06274	LOC5576244|AAEL002851	Up	0.109783	0.0413038	0.0069986
ISC/EB-1	Ctri06274	LOC5576244|AAEL002851	Up	0.109783	0.0413038	0.0069986
ISC/EB-1	Ctri08339	LOC5564117|AAEL019408	Up	0.106759	0.041012	0.00959808
ISC/EB-1	Ctri08339	LOC5564117|AAEL019408	Up	0.106759	0.041012	0.00959808
ISC/EB-1	Ctri01295	LOC5576894|AAEL003046	Up	0.105477	0.0486179	0.0333933
ISC/EB-1	Ctri01295	LOC5576894|AAEL003046	Up	0.105477	0.0486179	0.0333933
ISC/EB-1	Ctri00039	LOC5566773|AAEL005628	Up	0.103795	0.054619	0.0489902
ISC/EB-1	Ctri00039	LOC5566773|AAEL005628	Up	0.103795	0.054619	0.0489902
ISC/EB-1	Ctri09168	LOC23687516|AAEL017096	Up	0.10331	0.0140983	0.000653122
ISC/EB-1	Ctri09168	LOC23687516|AAEL017096	Up	0.10331	0.0140983	0.000653122
ISC/EB-1	Ctri02547	LOC5571789|AAEL009317	Up	0.102899	0.045218	0.0191962
ISC/EB-1	Ctri02547	LOC5571789|AAEL009317	Up	0.102899	0.045218	0.0191962
ISC/EB-1	Ctri07886		Up	0.102414	0.0522388	0.0463907
ISC/EB-1	Ctri07886		Up	0.102414	0.0522388	0.0463907
ISC/EB-1	Ctri01751	LOC5578382|AAEL013661	Up	0.0988296	0.0237951	0.000707439
ISC/EB-1	Ctri01751	LOC5578382|AAEL013661	Up	0.0988296	0.0237951	0.000707439
ISC/EB-1	Ctri05950	LOC5577723|AAEL013359	Up	0.0969406	0.0172028	0.00105684
ISC/EB-1	Ctri05950	LOC5577723|AAEL013359	Up	0.0969406	0.0172028	0.00105684
ISC/EB-1	Ctri08140	LOC5578123|AAEL003427	Up	0.0944686	0.0135771	0.00026426
ISC/EB-1	Ctri08140	LOC5578123|AAEL003427	Up	0.0944686	0.0135771	0.00026426
ISC/EB-1	Ctri06408	LOC5572996|-	Up	0.0941551	0.0352431	0.00859828
ISC/EB-1	Ctri06408	LOC5572996|-	Up	0.0941551	0.0352431	0.00859828
ISC/EB-1	Ctri04450	LOC5572791|AAEL001896	Up	0.0921822	0.0437515	0.034993
ISC/EB-1	Ctri04450	LOC5572791|AAEL001896	Up	0.0921822	0.0437515	0.034993
ISC/EB-1	Ctri08281		Up	0.0909775	0.0385557	0.0195961
ISC/EB-1	Ctri08281		Up	0.0909775	0.0385557	0.0195961
ISC/EB-1	Ctri08829	LOC5571763|AAEL009287	Up	0.0890762	0.0383679	0.0191962
ISC/EB-1	Ctri08829	LOC5571763|AAEL009287	Up	0.0890762	0.0383679	0.0191962
ISC/EB-1	Ctri00224	LOC5567559|AAEL006158	Up	0.0889688	0.0257915	0.00178459
ISC/EB-1	Ctri00224	LOC5567559|AAEL006158	Up	0.0889688	0.0257915	0.00178459
ISC/EB-1	Ctri03512	LOC5569514|AAEL007702	Up	0.0889214	0.0440143	0.0421916
ISC/EB-1	Ctri03512	LOC5569514|AAEL007702	Up	0.0889214	0.0440143	0.0421916
ISC/EB-1	Ctri09515		Up	0.0878244	0.0340966	0.009998
ISC/EB-1	Ctri09515		Up	0.0878244	0.0340966	0.009998
ISC/EB-1	Ctri03635	LOC110677182|-	Up	0.0838234	0.0155968	0.00147351
ISC/EB-1	Ctri03635	LOC110677182|-	Up	0.0838234	0.0155968	0.00147351
ISC/EB-1	Ctri01626	LOC5564072|AAEL004067	Up	0.0818917	0.0301892	0.00619876
ISC/EB-1	Ctri01626	LOC5564072|AAEL004067	Up	0.0818917	0.0301892	0.00619876
ISC/EB-1	Ctri05764	LOC5573863|AAEL010765	Up	0.068666	0.0299972	0.0231954
ISC/EB-1	Ctri05764	LOC5573863|AAEL010765	Up	0.068666	0.0299972	0.0231954
ISC/EB-1	Ctri09438	LOC5564212|AAEL004151	Up	0.0566916	0.0175019	0.00488039
ISC/EB-1	Ctri09438	LOC5564212|AAEL004151	Up	0.0566916	0.0175019	0.00488039
ISC/EB-1	Ctri11759	LOC5563592|AAEL000010	Up	0.0388357	0.0146769	0.00839832
ISC/EB-1	Ctri11759	LOC5563592|AAEL000010	Up	0.0388357	0.0146769	0.00839832
ISC/EB-1	Ctri08066	LOC110680475|AAEL009506	Up	0.033389	0.0167052	0.0439912
ISC/EB-1	Ctri08066	LOC110680475|AAEL009506	Up	0.033389	0.0167052	0.0439912
ISC/EB-1	Ctri01796	LOC5569670|AAEL007824	Down	-0.0385914	0.0177271	0.0287942
ISC/EB-1	Ctri01796	LOC5569670|AAEL007824	Down	-0.0385914	0.0177271	0.0287942
ISC/EB-1	Ctri11942	LOC5573974|AAEL010821	Down	-0.0914414	0.0161274	2.71989e-05
ISC/EB-1	Ctri11942	LOC5573974|AAEL010821	Down	-0.0914414	0.0161274	2.71989e-05
ISC/EB-1	Ctri12395	LOC5570780|AAEL008543	Down	-0.0921845	0.0340533	0.00779844
ISC/EB-1	Ctri12395	LOC5570780|AAEL008543	Down	-0.0921845	0.0340533	0.00779844
ISC/EB-1	Ctri00881		Down	-0.0922096	0.0414845	0.025195
ISC/EB-1	Ctri00881		Down	-0.0922096	0.0414845	0.025195
ISC/EB-1	Ctri11310	LOC5568211|AAEL006642	Down	-0.0927232	0.0327482	0.004999
ISC/EB-1	Ctri11310	LOC5568211|AAEL006642	Down	-0.0927232	0.0327482	0.004999
ISC/EB-1	Ctri06339	LOC5573732|AAEL000291	Down	-0.0997466	0.0401233	0.0113977
ISC/EB-1	Ctri06339	LOC5573732|AAEL000291	Down	-0.0997466	0.0401233	0.0113977
ISC/EB-1	Ctri09222		Down	-0.101049	0.0489472	0.0379924
ISC/EB-1	Ctri09222		Down	-0.101049	0.0489472	0.0379924
ISC/EB-1	Ctri05381	LOC23687404|AAEL016984	Down	-0.114214	0.0331776	0.00340858
ISC/EB-1	Ctri05381	LOC23687404|AAEL016984	Down	-0.114214	0.0331776	0.00340858
ISC/EB-1	Ctri02647	LOC5565589|AAEL004865	Down	-0.11631	0.0279121	0.00039878
ISC/EB-1	Ctri02647	LOC5565589|AAEL004865	Down	-0.11631	0.0279121	0.00039878
ISC/EB-1	Ctri11253	LOC5568503|AAEL006922	Down	-0.11878	0.0325284	0.000821672
ISC/EB-1	Ctri11253	LOC5568503|AAEL006922	Down	-0.11878	0.0325284	0.000821672
ISC/EB-1	Ctri00484	LOC5576477|AAEL002887	Down	-0.126005	0.0517564	0.0121976
ISC/EB-1	Ctri00484	LOC5576477|AAEL002887	Down	-0.126005	0.0517564	0.0121976
ISC/EB-1	Ctri05471	LOC5580325|AAEL013068	Down	-0.126217	0.0459473	0.00519896
ISC/EB-1	Ctri05471	LOC5580325|AAEL013068	Down	-0.126217	0.0459473	0.00519896
ISC/EB-1	Ctri01268	LOC110675318|-	Down	-0.12632	0.0590672	0.0319936
ISC/EB-1	Ctri01268	LOC110675318|-	Down	-0.12632	0.0590672	0.0319936
ISC/EB-1	Ctri09666	LOC5568743|AAEL007092	Down	-0.130335	0.0633095	0.0377924
ISC/EB-1	Ctri09666	LOC5568743|AAEL007092	Down	-0.130335	0.0633095	0.0377924
ISC/EB-1	Ctri12558	LOC5575103|AAEL011657	Down	-0.135864	0.0656231	0.0387922
ISC/EB-1	Ctri12558	LOC5575103|AAEL011657	Down	-0.135864	0.0656231	0.0387922
ISC/EB-1	Ctri06498	LOC110680967|-	Down	-0.138915	0.0429102	0.00505997
ISC/EB-1	Ctri06498	LOC110680967|-	Down	-0.138915	0.0429102	0.00505997
ISC/EB-1	Ctri06935	LOC5579795|AAEL003957	Down	-0.14012	0.0235461	0.000192909
ISC/EB-1	Ctri06935	LOC5579795|AAEL003957	Down	-0.14012	0.0235461	0.000192909
ISC/EB-1	Ctri10639	LOC5564563|AAEL014510	Down	-0.144659	0.0664712	0.0303939
ISC/EB-1	Ctri10639	LOC5564563|AAEL014510	Down	-0.144659	0.0664712	0.0303939
ISC/EB-1	Ctri01098	LOC5580074|AAEL002178	Down	-0.145627	0.0697832	0.0417916
ISC/EB-1	Ctri01098	LOC5580074|AAEL002178	Down	-0.145627	0.0697832	0.0417916
ISC/EB-1	Ctri11721	LOC5576266|AAEL012419	Down	-0.146053	0.0679841	0.0295941
ISC/EB-1	Ctri11721	LOC5576266|AAEL012419	Down	-0.146053	0.0679841	0.0295941
ISC/EB-1	Ctri02855	LOC110679868|AAEL027050	Down	-0.148222	0.069604	0.0369926
ISC/EB-1	Ctri02855	LOC110679868|AAEL027050	Down	-0.148222	0.069604	0.0369926
ISC/EB-1	Ctri05023	LOC5575162|AAEL000328	Down	-0.149168	0.0673726	0.0255949
ISC/EB-1	Ctri05023	LOC5575162|AAEL000328	Down	-0.149168	0.0673726	0.0255949
ISC/EB-1	Ctri01988	LOC5578276|AAEL003503	Down	-0.150462	0.0669331	0.0227954
ISC/EB-1	Ctri01988	LOC5578276|AAEL003503	Down	-0.150462	0.0669331	0.0227954
ISC/EB-1	Ctri00492		Down	-0.152683	0.0465895	0.0056427
ISC/EB-1	Ctri00492		Down	-0.152683	0.0465895	0.0056427
ISC/EB-1	Ctri06369	LOC5575274|AAEL011746	Down	-0.156012	0.0556311	0.00422547
ISC/EB-1	Ctri06369	LOC5575274|AAEL011746	Down	-0.156012	0.0556311	0.00422547
ISC/EB-1	Ctri08674	LOC5571265|AAEL001588	Down	-0.16083	0.0690695	0.0193961
ISC/EB-1	Ctri08674	LOC5571265|AAEL001588	Down	-0.16083	0.0690695	0.0193961
ISC/EB-1	Ctri10467	LOC5578975|AAEL024153	Down	-0.164361	0.0619578	0.009998
ISC/EB-1	Ctri10467	LOC5578975|AAEL024153	Down	-0.164361	0.0619578	0.009998
ISC/EB-1	Ctri00333	LOC5568331|AAEL001094	Down	-0.169658	0.051395	0.00200117
ISC/EB-1	Ctri00333	LOC5568331|AAEL001094	Down	-0.169658	0.051395	0.00200117
ISC/EB-1	Ctri04189	LOC5575578|AAEL002668	Down	-0.170394	0.0568605	0.00379924
ISC/EB-1	Ctri04189	LOC5575578|AAEL002668	Down	-0.170394	0.0568605	0.00379924
ISC/EB-1	Ctri00290	LOC110674836|AAEL020033	Down	-0.170546	0.0785506	0.0309938
ISC/EB-1	Ctri00290	LOC110674836|AAEL020033	Down	-0.170546	0.0785506	0.0309938
ISC/EB-1	Ctri00213	LOC5564185|AAEL014335	Down	-0.171477	0.0648396	0.00979804
ISC/EB-1	Ctri00213	LOC5564185|AAEL014335	Down	-0.171477	0.0648396	0.00979804
ISC/EB-1	Ctri01176	LOC5571976|AAEL009467	Down	-0.171621	0.0353108	0.000563987
ISC/EB-1	Ctri01176	LOC5571976|AAEL009467	Down	-0.171621	0.0353108	0.000563987
ISC/EB-1	Ctri04749	LOC5574634|AAEL020739	Down	-0.173251	0.0586326	0.00359928
ISC/EB-1	Ctri04749	LOC5574634|AAEL020739	Down	-0.173251	0.0586326	0.00359928
ISC/EB-1	Ctri00279		Down	-0.174058	0.070653	0.0163967
ISC/EB-1	Ctri00279		Down	-0.174058	0.070653	0.0163967
ISC/EB-1	Ctri10886	LOC5577324|AAEL000433	Down	-0.176926	0.0876588	0.0437912
ISC/EB-1	Ctri10886	LOC5577324|AAEL000433	Down	-0.176926	0.0876588	0.0437912
ISC/EB-1	Ctri03448	LOC110675257|AAEL025410	Down	-0.178102	0.0555862	0.00247135
ISC/EB-1	Ctri03448	LOC110675257|AAEL025410	Down	-0.178102	0.0555862	0.00247135
ISC/EB-1	Ctri12231	LOC5575032|AAEL011584	Down	-0.178474	0.0491475	0.0017767
ISC/EB-1	Ctri12231	LOC5575032|AAEL011584	Down	-0.178474	0.0491475	0.0017767
ISC/EB-1	Ctri08192	LOC5574178|AAEL019806	Down	-0.179612	0.0719722	0.0121976
ISC/EB-1	Ctri08192	LOC5574178|AAEL019806	Down	-0.179612	0.0719722	0.0121976
ISC/EB-1	Ctri06758	LOC5568396|AAEL006776	Down	-0.179936	0.0720241	0.0145971
ISC/EB-1	Ctri06758	LOC5568396|AAEL006776	Down	-0.179936	0.0720241	0.0145971
ISC/EB-1	Ctri02704	LOC5580193|-	Down	-0.180351	0.0437971	0.000578201
ISC/EB-1	Ctri02704	LOC5580193|-	Down	-0.180351	0.0437971	0.000578201
ISC/EB-1	Ctri04735		Down	-0.181865	0.072	0.0131974
ISC/EB-1	Ctri04735		Down	-0.181865	0.072	0.0131974
ISC/EB-1	Ctri07641	LOC5563827|AAEL014161	Down	-0.182103	0.0865215	0.0355929
ISC/EB-1	Ctri07641	LOC5563827|AAEL014161	Down	-0.182103	0.0865215	0.0355929
ISC/EB-1	Ctri08481	LOC5571453|AAEL009074	Down	-0.183022	0.0320143	0.000376677
ISC/EB-1	Ctri08481	LOC5571453|AAEL009074	Down	-0.183022	0.0320143	0.000376677
ISC/EB-1	Ctri09729	LOC5574912|AAEL002748	Down	-0.184769	0.092506	0.0467906
ISC/EB-1	Ctri09729	LOC5574912|AAEL002748	Down	-0.184769	0.092506	0.0467906
ISC/EB-1	Ctri06713	LOC5566596|AAEL000758	Down	-0.185635	0.063066	0.0029994
ISC/EB-1	Ctri06713	LOC5566596|AAEL000758	Down	-0.185635	0.063066	0.0029994
ISC/EB-1	Ctri03181	LOC5574603|AAEL002415	Down	-0.186155	0.063906	0.00619876
ISC/EB-1	Ctri03181	LOC5574603|AAEL002415	Down	-0.186155	0.063906	0.00619876
ISC/EB-1	Ctri07594		Down	-0.195178	0.080178	0.0189962
ISC/EB-1	Ctri07594		Down	-0.195178	0.080178	0.0189962
ISC/EB-1	Ctri03866	LOC5565836|AAEL005017	Down	-0.19654	0.0708225	0.00519896
ISC/EB-1	Ctri03866	LOC5565836|AAEL005017	Down	-0.19654	0.0708225	0.00519896
ISC/EB-1	Ctri09212	LOC5578596|AAEL013778	Down	-0.196545	0.0570904	0.00219251
ISC/EB-1	Ctri09212	LOC5578596|AAEL013778	Down	-0.196545	0.0570904	0.00219251
ISC/EB-1	Ctri05450	LOC5565350|AAEL004741	Down	-0.196567	0.0559013	0.00171245
ISC/EB-1	Ctri05450	LOC5565350|AAEL004741	Down	-0.196567	0.0559013	0.00171245
ISC/EB-1	Ctri12085		Down	-0.197936	0.0743812	0.00979804
ISC/EB-1	Ctri12085		Down	-0.197936	0.0743812	0.00979804
ISC/EB-1	Ctri11303	LOC5568222|AAEL006647	Down	-0.1983	0.0847786	0.0163967
ISC/EB-1	Ctri11303	LOC5568222|AAEL006647	Down	-0.1983	0.0847786	0.0163967
ISC/EB-1	Ctri02387	LOC110674164|AAEL011982	Down	-0.199065	0.0788864	0.0127974
ISC/EB-1	Ctri02387	LOC110674164|AAEL011982	Down	-0.199065	0.0788864	0.0127974
ISC/EB-1	Ctri06196	LOC5577132|AAEL023019	Down	-0.201341	0.0918717	0.0325935
ISC/EB-1	Ctri06196	LOC5577132|AAEL023019	Down	-0.201341	0.0918717	0.0325935
ISC/EB-1	Ctri04118	LOC5571854|AAEL009345	Down	-0.201912	0.0680815	0.00459908
ISC/EB-1	Ctri04118	LOC5571854|AAEL009345	Down	-0.201912	0.0680815	0.00459908
ISC/EB-1	Ctri09614	LOC5577289|AAEL013139	Down	-0.201931	0.0366785	0.00104155
ISC/EB-1	Ctri09614	LOC5577289|AAEL013139	Down	-0.201931	0.0366785	0.00104155
ISC/EB-1	Ctri12695	LOC5570204|AAEL008164	Down	-0.202603	0.0860227	0.0191962
ISC/EB-1	Ctri12695	LOC5570204|AAEL008164	Down	-0.202603	0.0860227	0.0191962
ISC/EB-1	Ctri01529	LOC5578624|AAEL003597	Down	-0.204892	0.0604319	0.00204767
ISC/EB-1	Ctri01529	LOC5578624|AAEL003597	Down	-0.204892	0.0604319	0.00204767
ISC/EB-1	Ctri09452	LOC5573545|AAEL010585	Down	-0.206813	0.0895088	0.0205959
ISC/EB-1	Ctri09452	LOC5573545|AAEL010585	Down	-0.206813	0.0895088	0.0205959
ISC/EB-1	Ctri10296	LOC5565670|AAEL014931	Down	-0.206958	0.0689874	0.00265685
ISC/EB-1	Ctri10296	LOC5565670|AAEL014931	Down	-0.206958	0.0689874	0.00265685
ISC/EB-1	Ctri02017	LOC5573469|AAEL010513	Down	-0.207665	0.0949882	0.0275945
ISC/EB-1	Ctri02017	LOC5573469|AAEL010513	Down	-0.207665	0.0949882	0.0275945
ISC/EB-1	Ctri10293	LOC5576045|AAEL012272	Down	-0.20845	0.0917692	0.0269946
ISC/EB-1	Ctri10293	LOC5576045|AAEL012272	Down	-0.20845	0.0917692	0.0269946
ISC/EB-1	Ctri11289	LOC5575715|AAEL012026	Down	-0.208855	0.0376979	0.000171079
ISC/EB-1	Ctri11289	LOC5575715|AAEL012026	Down	-0.208855	0.0376979	0.000171079
ISC/EB-1	Ctri07717	LOC5573266|AAEL019802	Down	-0.210031	0.104938	0.0463907
ISC/EB-1	Ctri07717	LOC5573266|AAEL019802	Down	-0.210031	0.104938	0.0463907
ISC/EB-1	Ctri07919	LOC5565441|AAEL000641	Down	-0.214953	0.041031	0.000262238
ISC/EB-1	Ctri07919	LOC5565441|AAEL000641	Down	-0.214953	0.041031	0.000262238
ISC/EB-1	Ctri10221	LOC5568881|AAEL007173	Down	-0.215573	0.0830981	0.00959808
ISC/EB-1	Ctri10221	LOC5568881|AAEL007173	Down	-0.215573	0.0830981	0.00959808
ISC/EB-1	Ctri10588	LOC5574348|AAEL002350	Down	-0.215577	0.0846747	0.0113977
ISC/EB-1	Ctri10588	LOC5574348|AAEL002350	Down	-0.215577	0.0846747	0.0113977
ISC/EB-1	Ctri08657	LOC5579030|AAEL013970	Down	-0.216056	0.103308	0.0343931
ISC/EB-1	Ctri08657	LOC5579030|AAEL013970	Down	-0.216056	0.103308	0.0343931
ISC/EB-1	Ctri06726	LOC5566612|AAEL000770	Down	-0.217031	0.106223	0.0461908
ISC/EB-1	Ctri06726	LOC5566612|AAEL000770	Down	-0.217031	0.106223	0.0461908
ISC/EB-1	Ctri12307	LOC5565978|AAEL027400	Down	-0.218419	0.0614925	0.00169163
ISC/EB-1	Ctri12307	LOC5565978|AAEL027400	Down	-0.218419	0.0614925	0.00169163
ISC/EB-1	Ctri09007	LOC5569005|AAEL007282	Down	-0.219306	0.0677447	0.00546686
ISC/EB-1	Ctri09007	LOC5569005|AAEL007282	Down	-0.219306	0.0677447	0.00546686
ISC/EB-1	Ctri01951	LOC23687580|AAEL017160	Down	-0.219822	0.063588	0.00187624
ISC/EB-1	Ctri01951	LOC23687580|AAEL017160	Down	-0.219822	0.063588	0.00187624
ISC/EB-1	Ctri03529	LOC5568076|AAEL006520	Down	-0.220408	0.0650931	0.00242025
ISC/EB-1	Ctri03529	LOC5568076|AAEL006520	Down	-0.220408	0.0650931	0.00242025
ISC/EB-1	Ctri09215		Down	-0.221681	0.0231621	5.83566e-05
ISC/EB-1	Ctri09215		Down	-0.221681	0.0231621	5.83566e-05
ISC/EB-1	Ctri09671		Down	-0.222643	0.0946283	0.0161968
ISC/EB-1	Ctri09671		Down	-0.222643	0.0946283	0.0161968
ISC/EB-1	Ctri08113	LOC5578090|AAEL003415	Down	-0.223092	0.0523142	0.000902632
ISC/EB-1	Ctri08113	LOC5578090|AAEL003415	Down	-0.223092	0.0523142	0.000902632
ISC/EB-1	Ctri06198	LOC5579855|AAEL018354	Down	-0.223103	0.0926948	0.0179964
ISC/EB-1	Ctri06198	LOC5579855|AAEL018354	Down	-0.223103	0.0926948	0.0179964
ISC/EB-1	Ctri06978	LOC5567131|-	Down	-0.224785	0.0612505	0.0016285
ISC/EB-1	Ctri06978	LOC5567131|-	Down	-0.224785	0.0612505	0.0016285
ISC/EB-1	Ctri06258		Down	-0.225159	0.0508948	0.000286098
ISC/EB-1	Ctri06258		Down	-0.225159	0.0508948	0.000286098
ISC/EB-1	Ctri11711	LOC5564860|AAEL004472	Down	-0.225372	0.0745062	0.00319936
ISC/EB-1	Ctri11711	LOC5564860|AAEL004472	Down	-0.225372	0.0745062	0.00319936
ISC/EB-1	Ctri08848	LOC5569288|AAEL007547	Down	-0.225829	0.0772777	0.00339932
ISC/EB-1	Ctri08848	LOC5569288|AAEL007547	Down	-0.225829	0.0772777	0.00339932
ISC/EB-1	Ctri08373	LOC5566687|AAEL005558	Down	-0.227745	0.0471388	0.000286302
ISC/EB-1	Ctri08373	LOC5566687|AAEL005558	Down	-0.227745	0.0471388	0.000286302
ISC/EB-1	Ctri09002	LOC5572347|AAEL009733	Down	-0.23027	0.0435807	0.00180399
ISC/EB-1	Ctri09002	LOC5572347|AAEL009733	Down	-0.23027	0.0435807	0.00180399
ISC/EB-1	Ctri00645		Down	-0.231408	0.112443	0.0403919
ISC/EB-1	Ctri00645		Down	-0.231408	0.112443	0.0403919
ISC/EB-1	Ctri06890	LOC5576220|AAEL002834	Down	-0.235072	0.0490649	0.000320257
ISC/EB-1	Ctri06890	LOC5576220|AAEL002834	Down	-0.235072	0.0490649	0.000320257
ISC/EB-1	Ctri05900	LOC5570960|AAEL008692	Down	-0.235273	0.0483674	0.00049146
ISC/EB-1	Ctri05900	LOC5570960|AAEL008692	Down	-0.235273	0.0483674	0.00049146
ISC/EB-1	Ctri04246	LOC5564019|AAEL019487	Down	-0.237018	0.054557	0.000461762
ISC/EB-1	Ctri04246	LOC5564019|AAEL019487	Down	-0.237018	0.054557	0.000461762
ISC/EB-1	Ctri08455	LOC5566143|AAEL005213	Down	-0.238012	0.0688994	0.0017935
ISC/EB-1	Ctri08455	LOC5566143|AAEL005213	Down	-0.238012	0.0688994	0.0017935
ISC/EB-1	Ctri08910		Down	-0.238076	0.116608	0.0465907
ISC/EB-1	Ctri08910		Down	-0.238076	0.116608	0.0465907
ISC/EB-1	Ctri07813	LOC5566416|AAEL025718	Down	-0.238287	0.10579	0.0267946
ISC/EB-1	Ctri07813	LOC5566416|AAEL025718	Down	-0.238287	0.10579	0.0267946
ISC/EB-1	Ctri01759		Down	-0.238944	0.0781549	0.00380794
ISC/EB-1	Ctri01759		Down	-0.238944	0.0781549	0.00380794
ISC/EB-1	Ctri08041	LOC5579102|AAEL003824	Down	-0.242189	0.0709851	0.0018073
ISC/EB-1	Ctri08041	LOC5579102|AAEL003824	Down	-0.242189	0.0709851	0.0018073
ISC/EB-1	Ctri05994		Down	-0.242338	0.0665759	0.00117383
ISC/EB-1	Ctri05994		Down	-0.242338	0.0665759	0.00117383
ISC/EB-1	Ctri00535		Down	-0.242982	0.106234	0.0193961
ISC/EB-1	Ctri00535		Down	-0.242982	0.106234	0.0193961
ISC/EB-1	Ctri04626	LOC5565303|AAEL004710	Down	-0.244417	0.0405844	0.000196418
ISC/EB-1	Ctri04626	LOC5565303|AAEL004710	Down	-0.244417	0.0405844	0.000196418
ISC/EB-1	Ctri00552	LOC5566652|AAEL012472	Down	-0.24472	0.113833	0.0277944
ISC/EB-1	Ctri00552	LOC5566652|AAEL012472	Down	-0.24472	0.113833	0.0277944
ISC/EB-1	Ctri03797	LOC5569067|AAEL001218	Down	-0.245365	0.0803556	0.00259948
ISC/EB-1	Ctri03797	LOC5569067|AAEL001218	Down	-0.245365	0.0803556	0.00259948
ISC/EB-1	Ctri10410	LOC5569895|AAEL008006	Down	-0.245401	0.126045	0.0495901
ISC/EB-1	Ctri10410	LOC5569895|AAEL008006	Down	-0.245401	0.126045	0.0495901
ISC/EB-1	Ctri08871	LOC5565513|AAEL014863	Down	-0.246253	0.0875798	0.00459908
ISC/EB-1	Ctri08871	LOC5565513|AAEL014863	Down	-0.246253	0.0875798	0.00459908
ISC/EB-1	Ctri06938	LOC5579798|AAEL003973	Down	-0.24723	0.108842	0.0243951
ISC/EB-1	Ctri06938	LOC5579798|AAEL003973	Down	-0.24723	0.108842	0.0243951
ISC/EB-1	Ctri08538	LOC5567811|AAEL000993	Down	-0.247722	0.105082	0.0165967
ISC/EB-1	Ctri08538	LOC5567811|AAEL000993	Down	-0.247722	0.105082	0.0165967
ISC/EB-1	Ctri03593		Down	-0.248265	0.0459038	0.000231669
ISC/EB-1	Ctri03593		Down	-0.248265	0.0459038	0.000231669
ISC/EB-1	Ctri01242		Down	-0.24851	0.0700045	0.00425589
ISC/EB-1	Ctri01242		Down	-0.24851	0.0700045	0.00425589
ISC/EB-1	Ctri05508	LOC5566397|AAEL005368	Down	-0.248746	0.123766	0.0469906
ISC/EB-1	Ctri05508	LOC5566397|AAEL005368	Down	-0.248746	0.123766	0.0469906
ISC/EB-1	Ctri11458	LOC5570230|AAEL008152	Down	-0.250507	0.12112	0.0365927
ISC/EB-1	Ctri11458	LOC5570230|AAEL008152	Down	-0.250507	0.12112	0.0365927
ISC/EB-1	Ctri09372	LOC5568141|AAEL006582	Down	-0.250786	0.0985361	0.010198
ISC/EB-1	Ctri09372	LOC5568141|AAEL006582	Down	-0.250786	0.0985361	0.010198
ISC/EB-1	Ctri08091	LOC23687735|AAEL017315	Down	-0.250941	0.0454574	0.000267492
ISC/EB-1	Ctri08091	LOC23687735|AAEL017315	Down	-0.250941	0.0454574	0.000267492
ISC/EB-1	Ctri09626	LOC5565706|AAEL021878	Down	-0.251039	0.119335	0.0315937
ISC/EB-1	Ctri09626	LOC5565706|AAEL021878	Down	-0.251039	0.119335	0.0315937
ISC/EB-1	Ctri06871	LOC5563911|AAEL003990	Down	-0.25276	0.0835742	0.0029994
ISC/EB-1	Ctri06871	LOC5563911|AAEL003990	Down	-0.25276	0.0835742	0.0029994
ISC/EB-1	Ctri04922	LOC5565770|AAEL004986	Down	-0.253074	0.0920594	0.00719856
ISC/EB-1	Ctri04922	LOC5565770|AAEL004986	Down	-0.253074	0.0920594	0.00719856
ISC/EB-1	Ctri11842		Down	-0.253122	0.0543518	0.000466223
ISC/EB-1	Ctri11842		Down	-0.253122	0.0543518	0.000466223
ISC/EB-1	Ctri06086	LOC5564775|AAEL004425	Down	-0.253438	0.0793685	0.00224491
ISC/EB-1	Ctri06086	LOC5564775|AAEL004425	Down	-0.253438	0.0793685	0.00224491
ISC/EB-1	Ctri05964		Down	-0.25385	0.0554522	0.000337297
ISC/EB-1	Ctri05964		Down	-0.25385	0.0554522	0.000337297
ISC/EB-1	Ctri11000	LOC5568659|AAEL007019	Down	-0.255022	0.0558526	0.000616699
ISC/EB-1	Ctri11000	LOC5568659|AAEL007019	Down	-0.255022	0.0558526	0.000616699
ISC/EB-1	Ctri02244	LOC5567836|AAEL001009	Down	-0.25507	0.105121	0.0163967
ISC/EB-1	Ctri02244	LOC5567836|AAEL001009	Down	-0.25507	0.105121	0.0163967
ISC/EB-1	Ctri10379		Down	-0.25705	0.128046	0.0423915
ISC/EB-1	Ctri10379		Down	-0.25705	0.128046	0.0423915
ISC/EB-1	Ctri00862	LOC5571226|AAEL008921	Down	-0.257167	0.0291886	3.5245e-05
ISC/EB-1	Ctri00862	LOC5571226|AAEL008921	Down	-0.257167	0.0291886	3.5245e-05
ISC/EB-1	Ctri12608	LOC5568046|AAEL006483	Down	-0.257731	0.0469675	9.3154e-05
ISC/EB-1	Ctri12608	LOC5568046|AAEL006483	Down	-0.257731	0.0469675	9.3154e-05
ISC/EB-1	Ctri01182	LOC5564969|AAEL020151	Down	-0.258709	0.123039	0.0331934
ISC/EB-1	Ctri01182	LOC5564969|AAEL020151	Down	-0.258709	0.123039	0.0331934
ISC/EB-1	Ctri02243	LOC5567835|AAEL000983	Down	-0.258781	0.0745909	0.00155804
ISC/EB-1	Ctri02243	LOC5567835|AAEL000983	Down	-0.258781	0.0745909	0.00155804
ISC/EB-1	Ctri09715	LOC5564469|AAEL014452	Down	-0.259019	0.0461092	0.000322207
ISC/EB-1	Ctri09715	LOC5564469|AAEL014452	Down	-0.259019	0.0461092	0.000322207
ISC/EB-1	Ctri02165	LOC5565156|AAEL004616	Down	-0.259196	0.0925274	0.00539892
ISC/EB-1	Ctri02165	LOC5565156|AAEL004616	Down	-0.259196	0.0925274	0.00539892
ISC/EB-1	Ctri05895	LOC5578149|AAEL013530	Down	-0.259397	0.0815153	0.00232052
ISC/EB-1	Ctri05895	LOC5578149|AAEL013530	Down	-0.259397	0.0815153	0.00232052
ISC/EB-1	Ctri10604	LOC5566025|AAEL020071	Down	-0.260212	0.119284	0.0305939
ISC/EB-1	Ctri10604	LOC5566025|AAEL020071	Down	-0.260212	0.119284	0.0305939
ISC/EB-1	Ctri12359	LOC5579901|AAEL001052	Down	-0.260423	0.0466788	5.81438e-05
ISC/EB-1	Ctri12359	LOC5579901|AAEL001052	Down	-0.260423	0.0466788	5.81438e-05
ISC/EB-1	Ctri11100	LOC5575813|AAEL012069	Down	-0.260913	0.0330152	0.000515027
ISC/EB-1	Ctri11100	LOC5575813|AAEL012069	Down	-0.260913	0.0330152	0.000515027
ISC/EB-1	Ctri04637	LOC5572466|AAEL001832	Down	-0.263864	0.0701521	0.000809924
ISC/EB-1	Ctri04637	LOC5572466|AAEL001832	Down	-0.263864	0.0701521	0.000809924
ISC/EB-1	Ctri07044	LOC5568690|AAEL007065	Down	-0.263971	0.0409288	0.000145935
ISC/EB-1	Ctri07044	LOC5568690|AAEL007065	Down	-0.263971	0.0409288	0.000145935
ISC/EB-1	Ctri03277	LOC5572167|AAEL023148	Down	-0.264714	0.0757568	0.00453614
ISC/EB-1	Ctri03277	LOC5572167|AAEL023148	Down	-0.264714	0.0757568	0.00453614
ISC/EB-1	Ctri06895		Down	-0.265315	0.103007	0.00939812
ISC/EB-1	Ctri06895		Down	-0.265315	0.103007	0.00939812
ISC/EB-1	Ctri01819	LOC5578144|AAEL013521	Down	-0.265361	0.118906	0.0269946
ISC/EB-1	Ctri01819	LOC5578144|AAEL013521	Down	-0.265361	0.118906	0.0269946
ISC/EB-1	Ctri08524	LOC5579871|AAEL005985	Down	-0.266533	0.0823619	0.00251352
ISC/EB-1	Ctri08524	LOC5579871|AAEL005985	Down	-0.266533	0.0823619	0.00251352
ISC/EB-1	Ctri12072	LOC5577452|AAEL013191	Down	-0.267428	0.132796	0.0459908
ISC/EB-1	Ctri12072	LOC5577452|AAEL013191	Down	-0.267428	0.132796	0.0459908
ISC/EB-1	Ctri06606	LOC5566585|AAEL000759	Down	-0.2679	0.089182	0.00279944
ISC/EB-1	Ctri06606	LOC5566585|AAEL000759	Down	-0.2679	0.089182	0.00279944
ISC/EB-1	Ctri00496		Down	-0.268658	0.135185	0.0465907
ISC/EB-1	Ctri00496		Down	-0.268658	0.135185	0.0465907
ISC/EB-1	Ctri00866	LOC5579160|AAEL003883	Down	-0.269235	0.0818886	0.00297761
ISC/EB-1	Ctri00866	LOC5579160|AAEL003883	Down	-0.269235	0.0818886	0.00297761
ISC/EB-1	Ctri01642		Down	-0.269319	0.0965048	0.00539892
ISC/EB-1	Ctri01642		Down	-0.269319	0.0965048	0.00539892
ISC/EB-1	Ctri12403	LOC5567843|AAEL001007	Down	-0.269938	0.123595	0.0307938
ISC/EB-1	Ctri12403	LOC5567843|AAEL001007	Down	-0.269938	0.123595	0.0307938
ISC/EB-1	Ctri08460	LOC5566119|AAEL022497	Down	-0.271921	0.0687731	0.00102762
ISC/EB-1	Ctri08460	LOC5566119|AAEL022497	Down	-0.271921	0.0687731	0.00102762
ISC/EB-1	Ctri02250	LOC5580095|AAEL002137	Down	-0.272348	0.100621	0.0079984
ISC/EB-1	Ctri02250	LOC5580095|AAEL002137	Down	-0.272348	0.100621	0.0079984
ISC/EB-1	Ctri06091	LOC5564792|AAEL004445	Down	-0.272479	0.103458	0.00859828
ISC/EB-1	Ctri06091	LOC5564792|AAEL004445	Down	-0.272479	0.103458	0.00859828
ISC/EB-1	Ctri05040	LOC5570900|AAEL001476	Down	-0.273136	0.082194	0.00228938
ISC/EB-1	Ctri05040	LOC5570900|AAEL001476	Down	-0.273136	0.082194	0.00228938
ISC/EB-1	Ctri10215	LOC5563554|AAEL000081	Down	-0.274903	0.129046	0.0321936
ISC/EB-1	Ctri10215	LOC5563554|AAEL000081	Down	-0.274903	0.129046	0.0321936
ISC/EB-1	Ctri06175	LOC5570050|AAEL000185	Down	-0.274939	0.102353	0.00959808
ISC/EB-1	Ctri06175	LOC5570050|AAEL000185	Down	-0.274939	0.102353	0.00959808
ISC/EB-1	Ctri07195	LOC5570660|AAEL026737	Down	-0.275138	0.0618642	0.000583039
ISC/EB-1	Ctri07195	LOC5570660|AAEL026737	Down	-0.275138	0.0618642	0.000583039
ISC/EB-1	Ctri09777	LOC5579878|AAEL001041	Down	-0.276223	0.0889975	0.00389028
ISC/EB-1	Ctri09777	LOC5579878|AAEL001041	Down	-0.276223	0.0889975	0.00389028
ISC/EB-1	Ctri02214	LOC5577985|AAEL013461	Down	-0.276239	0.081104	0.00143112
ISC/EB-1	Ctri02214	LOC5577985|AAEL013461	Down	-0.276239	0.081104	0.00143112
ISC/EB-1	Ctri04999	LOC5580153|AAEL011394	Down	-0.277096	0.125123	0.0271946
ISC/EB-1	Ctri04999	LOC5580153|AAEL011394	Down	-0.277096	0.125123	0.0271946
ISC/EB-1	Ctri03235	LOC5580192|AAEL002551	Down	-0.27783	0.069017	0.000970123
ISC/EB-1	Ctri03235	LOC5580192|AAEL002551	Down	-0.27783	0.069017	0.000970123
ISC/EB-1	Ctri03754	LOC5577908|AAEL003347	Down	-0.279506	0.113123	0.0111978
ISC/EB-1	Ctri03754	LOC5577908|AAEL003347	Down	-0.279506	0.113123	0.0111978
ISC/EB-1	Ctri00647	LOC5574966|AAEL002527	Down	-0.280593	0.077552	0.00144729
ISC/EB-1	Ctri00647	LOC5574966|AAEL002527	Down	-0.280593	0.077552	0.00144729
ISC/EB-1	Ctri12473	LOC5571237|AAEL008924	Down	-0.282292	0.120188	0.0195961
ISC/EB-1	Ctri12473	LOC5571237|AAEL008924	Down	-0.282292	0.120188	0.0195961
ISC/EB-1	Ctri10682	LOC5572872|AAEL010078	Down	-0.282903	0.136891	0.0405919
ISC/EB-1	Ctri10682	LOC5572872|AAEL010078	Down	-0.282903	0.136891	0.0405919
ISC/EB-1	Ctri10796		Down	-0.285179	0.079428	0.00388562
ISC/EB-1	Ctri10796		Down	-0.285179	0.079428	0.00388562
ISC/EB-1	Ctri09418		Down	-0.285397	0.124987	0.0223955
ISC/EB-1	Ctri09418		Down	-0.285397	0.124987	0.0223955
ISC/EB-1	Ctri03094	LOC5570837|AAEL018695	Down	-0.285694	0.132343	0.0337932
ISC/EB-1	Ctri03094	LOC5570837|AAEL018695	Down	-0.285694	0.132343	0.0337932
ISC/EB-1	Ctri06940		Down	-0.289012	0.087765	0.00261236
ISC/EB-1	Ctri06940		Down	-0.289012	0.087765	0.00261236
ISC/EB-1	Ctri03464	LOC5567341|AAEL006011	Down	-0.289142	0.0816848	0.00186016
ISC/EB-1	Ctri03464	LOC5567341|AAEL006011	Down	-0.289142	0.0816848	0.00186016
ISC/EB-1	Ctri09269	LOC5571825|AAEL001698	Down	-0.2892	0.0569332	0.000239523
ISC/EB-1	Ctri09269	LOC5571825|AAEL001698	Down	-0.2892	0.0569332	0.000239523
ISC/EB-1	Ctri10724	LOC5570347|AAEL001389	Down	-0.289489	0.12723	0.0255949
ISC/EB-1	Ctri10724	LOC5570347|AAEL001389	Down	-0.289489	0.12723	0.0255949
ISC/EB-1	Ctri11734		Down	-0.289586	0.0917498	0.00353628
ISC/EB-1	Ctri11734		Down	-0.289586	0.0917498	0.00353628
ISC/EB-1	Ctri09152	LOC5577072|AAEL003108	Down	-0.290057	0.126389	0.0223955
ISC/EB-1	Ctri09152	LOC5577072|AAEL003108	Down	-0.290057	0.126389	0.0223955
ISC/EB-1	Ctri12259	LOC5574220|AAEL010991	Down	-0.291875	0.0695814	0.000778942
ISC/EB-1	Ctri12259	LOC5574220|AAEL010991	Down	-0.291875	0.0695814	0.000778942
ISC/EB-1	Ctri06593	LOC5577227|AAEL003130	Down	-0.292386	0.0339044	0.000139817
ISC/EB-1	Ctri06593	LOC5577227|AAEL003130	Down	-0.292386	0.0339044	0.000139817
ISC/EB-1	Ctri02841	LOC5566650|AAEL015644	Down	-0.292538	0.115439	0.0103979
ISC/EB-1	Ctri02841	LOC5566650|AAEL015644	Down	-0.292538	0.115439	0.0103979
ISC/EB-1	Ctri06231	LOC5578091|-	Down	-0.29291	0.0832092	0.000954966
ISC/EB-1	Ctri06231	LOC5578091|-	Down	-0.29291	0.0832092	0.000954966
ISC/EB-1	Ctri01479	LOC5576472|AAEL002886	Down	-0.293214	0.0471976	4.70678e-05
ISC/EB-1	Ctri01479	LOC5576472|AAEL002886	Down	-0.293214	0.0471976	4.70678e-05
ISC/EB-1	Ctri07825	LOC5564361|AAEL020132	Down	-0.293747	0.1197	0.0117976
ISC/EB-1	Ctri07825	LOC5564361|AAEL020132	Down	-0.293747	0.1197	0.0117976
ISC/EB-1	Ctri04547	LOC5568244|AAEL022611	Down	-0.294363	0.149493	0.0469906
ISC/EB-1	Ctri04547	LOC5568244|AAEL022611	Down	-0.294363	0.149493	0.0469906
ISC/EB-1	Ctri01643		Down	-0.294979	0.064042	0.000403276
ISC/EB-1	Ctri01643		Down	-0.294979	0.064042	0.000403276
ISC/EB-1	Ctri02908	LOC5565605|AAEL023022	Down	-0.29562	0.139712	0.0325935
ISC/EB-1	Ctri02908	LOC5565605|AAEL023022	Down	-0.29562	0.139712	0.0325935
ISC/EB-1	Ctri03243	LOC5563706|AAEL003921	Down	-0.296823	0.132551	0.0277944
ISC/EB-1	Ctri03243	LOC5563706|AAEL003921	Down	-0.296823	0.132551	0.0277944
ISC/EB-1	Ctri02376	LOC5577697|AAEL013334	Down	-0.297003	0.0953005	0.00346871
ISC/EB-1	Ctri02376	LOC5577697|AAEL013334	Down	-0.297003	0.0953005	0.00346871
ISC/EB-1	Ctri02095	LOC110680825|AAEL022058	Down	-0.299119	0.100386	0.00435089
ISC/EB-1	Ctri02095	LOC110680825|AAEL022058	Down	-0.299119	0.100386	0.00435089
ISC/EB-1	Ctri05937	LOC5571153|AAEL008849	Down	-0.299714	0.0503475	0.000213361
ISC/EB-1	Ctri05937	LOC5571153|AAEL008849	Down	-0.299714	0.0503475	0.000213361
ISC/EB-1	Ctri09685	LOC5573994|AAEL010843	Down	-0.300156	0.0277303	1.31429e-05
ISC/EB-1	Ctri09685	LOC5573994|AAEL010843	Down	-0.300156	0.0277303	1.31429e-05
ISC/EB-1	Ctri07065	LOC110678029|AAEL021557	Down	-0.300194	0.149363	0.0415917
ISC/EB-1	Ctri07065	LOC110678029|AAEL021557	Down	-0.300194	0.149363	0.0415917
ISC/EB-1	Ctri06180	LOC5568010|AAEL006472	Down	-0.300225	0.130787	0.0237952
ISC/EB-1	Ctri06180	LOC5568010|AAEL006472	Down	-0.300225	0.130787	0.0237952
ISC/EB-1	Ctri11386	LOC5564183|AAEL004121	Down	-0.300634	0.104683	0.00459908
ISC/EB-1	Ctri11386	LOC5564183|AAEL004121	Down	-0.300634	0.104683	0.00459908
ISC/EB-1	Ctri10543	LOC5566822|AAEL005666	Down	-0.302946	0.0839112	0.00178021
ISC/EB-1	Ctri10543	LOC5566822|AAEL005666	Down	-0.302946	0.0839112	0.00178021
ISC/EB-1	Ctri10376		Down	-0.303157	0.107938	0.004999
ISC/EB-1	Ctri10376		Down	-0.303157	0.107938	0.004999
ISC/EB-1	Ctri02245	LOC5567839|AAEL001005	Down	-0.303423	0.0545592	0.000203051
ISC/EB-1	Ctri02245	LOC5567839|AAEL001005	Down	-0.303423	0.0545592	0.000203051
ISC/EB-1	Ctri01807		Down	-0.303601	0.0717078	0.000438527
ISC/EB-1	Ctri01807		Down	-0.303601	0.0717078	0.000438527
ISC/EB-1	Ctri02615	LOC5574053|AAEL010893	Down	-0.304079	0.116628	0.00959808
ISC/EB-1	Ctri02615	LOC5574053|AAEL010893	Down	-0.304079	0.116628	0.00959808
ISC/EB-1	Ctri03177	LOC5574590|AAEL002416	Down	-0.304572	0.080404	0.00101262
ISC/EB-1	Ctri03177	LOC5574590|AAEL002416	Down	-0.304572	0.080404	0.00101262
ISC/EB-1	Ctri02143	LOC5573870|AAEL010791	Down	-0.305557	0.0940753	0.00550269
ISC/EB-1	Ctri02143	LOC5573870|AAEL010791	Down	-0.305557	0.0940753	0.00550269
ISC/EB-1	Ctri05547	LOC23687783|AAEL017363	Down	-0.306001	0.10605	0.00639872
ISC/EB-1	Ctri05547	LOC23687783|AAEL017363	Down	-0.306001	0.10605	0.00639872
ISC/EB-1	Ctri01508	LOC5578702|AAEL027002	Down	-0.30652	0.0877046	0.00429972
ISC/EB-1	Ctri01508	LOC5578702|AAEL027002	Down	-0.30652	0.0877046	0.00429972
ISC/EB-1	Ctri04172	LOC5566976|AAEL005744	Down	-0.306723	0.121436	0.0133973
ISC/EB-1	Ctri04172	LOC5566976|AAEL005744	Down	-0.306723	0.121436	0.0133973
ISC/EB-1	Ctri07655	LOC5572716|-	Down	-0.307082	0.134871	0.0215957
ISC/EB-1	Ctri07655	LOC5572716|-	Down	-0.307082	0.134871	0.0215957
ISC/EB-1	Ctri12034	LOC5570289|AAEL008228	Down	-0.308265	0.126467	0.0173965
ISC/EB-1	Ctri12034	LOC5570289|AAEL008228	Down	-0.308265	0.126467	0.0173965
ISC/EB-1	Ctri02858	LOC5573319|AAEL010403	Down	-0.308611	0.0878637	0.00160578
ISC/EB-1	Ctri02858	LOC5573319|AAEL010403	Down	-0.308611	0.0878637	0.00160578
ISC/EB-1	Ctri07638	LOC5570176|AAEL024563	Down	-0.309259	0.101489	0.00279944
ISC/EB-1	Ctri07638	LOC5570176|AAEL024563	Down	-0.309259	0.101489	0.00279944
ISC/EB-1	Ctri01239	LOC5564917|AAEL026744	Down	-0.310179	0.0861652	0.00150106
ISC/EB-1	Ctri01239	LOC5564917|AAEL026744	Down	-0.310179	0.0861652	0.00150106
ISC/EB-1	Ctri11854	LOC5578022|AAEL003373	Down	-0.310383	0.0625473	0.000211724
ISC/EB-1	Ctri11854	LOC5578022|AAEL003373	Down	-0.310383	0.0625473	0.000211724
ISC/EB-1	Ctri03330	LOC5567420|AAEL025013	Down	-0.310753	0.132393	0.0203959
ISC/EB-1	Ctri03330	LOC5567420|AAEL025013	Down	-0.310753	0.132393	0.0203959
ISC/EB-1	Ctri07678	LOC5568451|AAEL006862	Down	-0.310954	0.0742307	0.000578249
ISC/EB-1	Ctri07678	LOC5568451|AAEL006862	Down	-0.310954	0.0742307	0.000578249
ISC/EB-1	Ctri02406		Down	-0.311146	0.0565218	0.000253374
ISC/EB-1	Ctri02406		Down	-0.311146	0.0565218	0.000253374
ISC/EB-1	Ctri08548	LOC5569147|AAEL007410	Down	-0.312404	0.135377	0.0225955
ISC/EB-1	Ctri08548	LOC5569147|AAEL007410	Down	-0.312404	0.135377	0.0225955
ISC/EB-1	Ctri07998	LOC5568959|AAEL007250	Down	-0.312784	0.110839	0.00459908
ISC/EB-1	Ctri07998	LOC5568959|AAEL007250	Down	-0.312784	0.110839	0.00459908
ISC/EB-1	Ctri08963	LOC5567142|AAEL005874	Down	-0.313168	0.156136	0.0417916
ISC/EB-1	Ctri08963	LOC5567142|AAEL005874	Down	-0.313168	0.156136	0.0417916
ISC/EB-1	Ctri01157	LOC5565025|AAEL014702	Down	-0.315389	0.0522083	7.41153e-05
ISC/EB-1	Ctri01157	LOC5565025|AAEL014702	Down	-0.315389	0.0522083	7.41153e-05
ISC/EB-1	Ctri04122	LOC5567962|AAEL019461	Down	-0.316571	0.12422	0.0119976
ISC/EB-1	Ctri04122	LOC5567962|AAEL019461	Down	-0.316571	0.12422	0.0119976
ISC/EB-1	Ctri05706	LOC5564541|AAEL004307	Down	-0.316575	0.0707783	0.000572061
ISC/EB-1	Ctri05706	LOC5564541|AAEL004307	Down	-0.316575	0.0707783	0.000572061
ISC/EB-1	Ctri12027	LOC5566167|AAEL005238	Down	-0.31705	0.087389	0.0014608
ISC/EB-1	Ctri12027	LOC5566167|AAEL005238	Down	-0.31705	0.087389	0.0014608
ISC/EB-1	Ctri07801	LOC5571202|AAEL008902	Down	-0.317441	0.0842935	0.000759379
ISC/EB-1	Ctri07801	LOC5571202|AAEL008902	Down	-0.317441	0.0842935	0.000759379
ISC/EB-1	Ctri00337	LOC5568329|AAEL001099	Down	-0.318457	0.146613	0.0285943
ISC/EB-1	Ctri00337	LOC5568329|AAEL001099	Down	-0.318457	0.146613	0.0285943
ISC/EB-1	Ctri03779	LOC5564842|AAEL018350	Down	-0.31886	0.0982877	0.0016783
ISC/EB-1	Ctri03779	LOC5564842|AAEL018350	Down	-0.31886	0.0982877	0.0016783
ISC/EB-1	Ctri09366	LOC5575706|AAEL012014	Down	-0.319766	0.0620532	0.000426872
ISC/EB-1	Ctri09366	LOC5575706|AAEL012014	Down	-0.319766	0.0620532	0.000426872
ISC/EB-1	Ctri01853	LOC5565048|AAEL004567	Down	-0.320411	0.0463037	0.00103267
ISC/EB-1	Ctri01853	LOC5565048|AAEL004567	Down	-0.320411	0.0463037	0.00103267
ISC/EB-1	Ctri08553		Down	-0.320803	0.121344	0.0107978
ISC/EB-1	Ctri08553		Down	-0.320803	0.121344	0.0107978
ISC/EB-1	Ctri05841	LOC5578361|AAEL003550	Down	-0.321303	0.127168	0.014797
ISC/EB-1	Ctri05841	LOC5578361|AAEL003550	Down	-0.321303	0.127168	0.014797
ISC/EB-1	Ctri07386		Down	-0.322357	0.0956486	0.00183823
ISC/EB-1	Ctri07386		Down	-0.322357	0.0956486	0.00183823
ISC/EB-1	Ctri11940	LOC5567373|AAEL006028	Down	-0.322915	0.138775	0.0227954
ISC/EB-1	Ctri11940	LOC5567373|AAEL006028	Down	-0.322915	0.138775	0.0227954
ISC/EB-1	Ctri12077	LOC5577456|AAEL013199	Down	-0.323545	0.0992018	0.00294648
ISC/EB-1	Ctri12077	LOC5577456|AAEL013199	Down	-0.323545	0.0992018	0.00294648
ISC/EB-1	Ctri08517		Down	-0.323991	0.161549	0.0413917
ISC/EB-1	Ctri08517		Down	-0.323991	0.161549	0.0413917
ISC/EB-1	Ctri10307	LOC5578870|AAEL003738	Down	-0.324821	0.123245	0.010198
ISC/EB-1	Ctri10307	LOC5578870|AAEL003738	Down	-0.324821	0.123245	0.010198
ISC/EB-1	Ctri01832		Down	-0.325168	0.134864	0.0187962
ISC/EB-1	Ctri01832		Down	-0.325168	0.134864	0.0187962
ISC/EB-1	Ctri02417		Down	-0.325606	0.0818813	0.000867456
ISC/EB-1	Ctri02417		Down	-0.325606	0.0818813	0.000867456
ISC/EB-1	Ctri09206	LOC5577049|AAEL020265	Down	-0.325651	0.108547	0.00239952
ISC/EB-1	Ctri09206	LOC5577049|AAEL020265	Down	-0.325651	0.108547	0.00239952
ISC/EB-1	Ctri06880	LOC5578522|AAEL013731	Down	-0.32715	0.1034	0.0025612
ISC/EB-1	Ctri06880	LOC5578522|AAEL013731	Down	-0.32715	0.1034	0.0025612
ISC/EB-1	Ctri08812	LOC5568481|AAEL006879	Down	-0.32953	0.113138	0.00459908
ISC/EB-1	Ctri08812	LOC5568481|AAEL006879	Down	-0.32953	0.113138	0.00459908
ISC/EB-1	Ctri01216	LOC5570448|AAEL008347	Down	-0.331176	0.10213	0.0019443
ISC/EB-1	Ctri01216	LOC5570448|AAEL008347	Down	-0.331176	0.10213	0.0019443
ISC/EB-1	Ctri05209	LOC5565249|AAEL014771	Down	-0.33132	0.165771	0.0469906
ISC/EB-1	Ctri05209	LOC5565249|AAEL014771	Down	-0.33132	0.165771	0.0469906
ISC/EB-1	Ctri07591	LOC5574953|AAEL011551	Down	-0.331963	0.0564845	4.55409e-05
ISC/EB-1	Ctri07591	LOC5574953|AAEL011551	Down	-0.331963	0.0564845	4.55409e-05
ISC/EB-1	Ctri10934	LOC5573606|AAEL002125	Down	-0.333072	0.104706	0.00260182
ISC/EB-1	Ctri10934	LOC5573606|AAEL002125	Down	-0.333072	0.104706	0.00260182
ISC/EB-1	Ctri06286	LOC5576238|AAEL002840	Down	-0.333464	0.108208	0.00279944
ISC/EB-1	Ctri06286	LOC5576238|AAEL002840	Down	-0.333464	0.108208	0.00279944
ISC/EB-1	Ctri10234	LOC5565788|AAEL014972	Down	-0.33382	0.124476	0.0113977
ISC/EB-1	Ctri10234	LOC5565788|AAEL014972	Down	-0.33382	0.124476	0.0113977
ISC/EB-1	Ctri11251	LOC5568502|AAEL019567	Down	-0.335094	0.0787996	0.000388936
ISC/EB-1	Ctri11251	LOC5568502|AAEL019567	Down	-0.335094	0.0787996	0.000388936
ISC/EB-1	Ctri06815		Down	-0.335248	0.0478008	3.70911e-05
ISC/EB-1	Ctri06815		Down	-0.335248	0.0478008	3.70911e-05
ISC/EB-1	Ctri07838		Down	-0.335511	0.147211	0.0227954
ISC/EB-1	Ctri07838		Down	-0.335511	0.147211	0.0227954
ISC/EB-1	Ctri00608	LOC5573409|AAEL026571	Down	-0.335946	0.126286	0.00759848
ISC/EB-1	Ctri00608	LOC5573409|AAEL026571	Down	-0.335946	0.126286	0.00759848
ISC/EB-1	Ctri10962	LOC5567160|AAEL005910	Down	-0.336322	0.0527813	0.000119061
ISC/EB-1	Ctri10962	LOC5567160|AAEL005910	Down	-0.336322	0.0527813	0.000119061
ISC/EB-1	Ctri01385	LOC5580021|AAEL009646	Down	-0.336381	0.0771982	0.000561692
ISC/EB-1	Ctri01385	LOC5580021|AAEL009646	Down	-0.336381	0.0771982	0.000561692
ISC/EB-1	Ctri10801		Down	-0.33676	0.152556	0.0269946
ISC/EB-1	Ctri10801		Down	-0.33676	0.152556	0.0269946
ISC/EB-1	Ctri02129	LOC110680809|AAEL024170	Down	-0.337274	0.0667448	0.000292692
ISC/EB-1	Ctri02129	LOC110680809|AAEL024170	Down	-0.337274	0.0667448	0.000292692
ISC/EB-1	Ctri00192		Down	-0.337433	0.0807948	0.000734446
ISC/EB-1	Ctri00192		Down	-0.337433	0.0807948	0.000734446
ISC/EB-1	Ctri01394		Down	-0.337604	0.164628	0.0387922
ISC/EB-1	Ctri01394		Down	-0.337604	0.164628	0.0387922
ISC/EB-1	Ctri00565	LOC5574012|AAEL010854	Down	-0.337791	0.133706	0.0125975
ISC/EB-1	Ctri00565	LOC5574012|AAEL010854	Down	-0.337791	0.133706	0.0125975
ISC/EB-1	Ctri12373	LOC5579888|AAEL001046	Down	-0.33783	0.138604	0.0153969
ISC/EB-1	Ctri12373	LOC5579888|AAEL001046	Down	-0.33783	0.138604	0.0153969
ISC/EB-1	Ctri10797		Down	-0.338906	0.146121	0.0189962
ISC/EB-1	Ctri10797		Down	-0.338906	0.146121	0.0189962
ISC/EB-1	Ctri00186	LOC5569484|AAEL025045	Down	-0.339844	0.12966	0.0131974
ISC/EB-1	Ctri00186	LOC5569484|AAEL025045	Down	-0.339844	0.12966	0.0131974
ISC/EB-1	Ctri10288	LOC5572285|AAEL001779	Down	-0.340872	0.0393669	4.49036e-05
ISC/EB-1	Ctri10288	LOC5572285|AAEL001779	Down	-0.340872	0.0393669	4.49036e-05
ISC/EB-1	Ctri09155		Down	-0.341158	0.0667949	0.000124667
ISC/EB-1	Ctri09155		Down	-0.341158	0.0667949	0.000124667
ISC/EB-1	Ctri04824	LOC5576029|AAEL012262	Down	-0.341361	0.04846	0.000956897
ISC/EB-1	Ctri04824	LOC5576029|AAEL012262	Down	-0.341361	0.04846	0.000956897
ISC/EB-1	Ctri07603	LOC5569782|AAEL007920	Down	-0.341527	0.071465	0.00193889
ISC/EB-1	Ctri07603	LOC5569782|AAEL007920	Down	-0.341527	0.071465	0.00193889
ISC/EB-1	Ctri02644		Down	-0.34159	0.067506	0.000211329
ISC/EB-1	Ctri02644		Down	-0.34159	0.067506	0.000211329
ISC/EB-1	Ctri06850		Down	-0.341617	0.129114	0.00839832
ISC/EB-1	Ctri06850		Down	-0.341617	0.129114	0.00839832
ISC/EB-1	Ctri09837	LOC5573673|AAEL019604	Down	-0.342301	0.0404362	4.81708e-05
ISC/EB-1	Ctri09837	LOC5573673|AAEL019604	Down	-0.342301	0.0404362	4.81708e-05
ISC/EB-1	Ctri06262		Down	-0.342635	0.166373	0.0455909
ISC/EB-1	Ctri06262		Down	-0.342635	0.166373	0.0455909
ISC/EB-1	Ctri10587	LOC5574345|AAEL002324	Down	-0.343346	0.0767065	0.000527752
ISC/EB-1	Ctri10587	LOC5574345|AAEL002324	Down	-0.343346	0.0767065	0.000527752
ISC/EB-1	Ctri08951	LOC110675609|AAEL021795	Down	-0.346633	0.0381777	2.78902e-05
ISC/EB-1	Ctri08951	LOC110675609|AAEL021795	Down	-0.346633	0.0381777	2.78902e-05
ISC/EB-1	Ctri07754	LOC110679049|AAEL007880	Down	-0.346678	0.0326319	8.71857e-06
ISC/EB-1	Ctri07754	LOC110679049|AAEL007880	Down	-0.346678	0.0326319	8.71857e-06
ISC/EB-1	Ctri06135	LOC5564087|AAEL019595	Down	-0.348894	0.0956162	0.0017435
ISC/EB-1	Ctri06135	LOC5564087|AAEL019595	Down	-0.348894	0.0956162	0.0017435
ISC/EB-1	Ctri09765	LOC5576852|AAEL012835	Down	-0.349938	0.113449	0.00319936
ISC/EB-1	Ctri09765	LOC5576852|AAEL012835	Down	-0.349938	0.113449	0.00319936
ISC/EB-1	Ctri04356	LOC5573954|AAEL002240	Down	-0.350185	0.0945179	0.00142976
ISC/EB-1	Ctri04356	LOC5573954|AAEL002240	Down	-0.350185	0.0945179	0.00142976
ISC/EB-1	Ctri05642	LOC5570916|AAEL001501	Down	-0.350659	0.0857605	0.000722541
ISC/EB-1	Ctri05642	LOC5570916|AAEL001501	Down	-0.350659	0.0857605	0.000722541
ISC/EB-1	Ctri07766	LOC5575688|AAEL012007	Down	-0.351077	0.17146	0.0393921
ISC/EB-1	Ctri07766	LOC5575688|AAEL012007	Down	-0.351077	0.17146	0.0393921
ISC/EB-1	Ctri12317	LOC5577997|AAEL003385	Down	-0.351643	0.106054	0.00305663
ISC/EB-1	Ctri12317	LOC5577997|AAEL003385	Down	-0.351643	0.106054	0.00305663
ISC/EB-1	Ctri01335	LOC5576864|AAEL012845	Down	-0.352094	0.132258	0.010198
ISC/EB-1	Ctri01335	LOC5576864|AAEL012845	Down	-0.352094	0.132258	0.010198
ISC/EB-1	Ctri02935	LOC5578918|AAEL003758	Down	-0.352457	0.140862	0.0171966
ISC/EB-1	Ctri02935	LOC5578918|AAEL003758	Down	-0.352457	0.140862	0.0171966
ISC/EB-1	Ctri01485	LOC5576468|AAEL002903	Down	-0.352754	0.088687	0.000771321
ISC/EB-1	Ctri01485	LOC5576468|AAEL002903	Down	-0.352754	0.088687	0.000771321
ISC/EB-1	Ctri05000		Down	-0.353143	0.169756	0.0393921
ISC/EB-1	Ctri05000		Down	-0.353143	0.169756	0.0393921
ISC/EB-1	Ctri08952	LOC110675611|AAEL026833	Down	-0.353743	0.0546802	5.59533e-05
ISC/EB-1	Ctri08952	LOC110675611|AAEL026833	Down	-0.353743	0.0546802	5.59533e-05
ISC/EB-1	Ctri06819	LOC5565217|AAEL004669	Down	-0.354153	0.099287	0.00170623
ISC/EB-1	Ctri06819	LOC5565217|AAEL004669	Down	-0.354153	0.099287	0.00170623
ISC/EB-1	Ctri06108	LOC5571751|AAEL023779	Down	-0.35463	0.144327	0.0111978
ISC/EB-1	Ctri06108	LOC5571751|AAEL023779	Down	-0.35463	0.144327	0.0111978
ISC/EB-1	Ctri05166		Down	-0.354847	0.0548219	0.000104423
ISC/EB-1	Ctri05166		Down	-0.354847	0.0548219	0.000104423
ISC/EB-1	Ctri08589	LOC5568120|AAEL018119	Down	-0.356234	0.0884649	0.000568684
ISC/EB-1	Ctri08589	LOC5568120|AAEL018119	Down	-0.356234	0.0884649	0.000568684
ISC/EB-1	Ctri11790	LOC5569950|AAEL008039	Down	-0.356891	0.0992989	0.00117397
ISC/EB-1	Ctri11790	LOC5569950|AAEL008039	Down	-0.356891	0.0992989	0.00117397
ISC/EB-1	Ctri01842	LOC5565049|-	Down	-0.356901	0.0803372	0.00042156
ISC/EB-1	Ctri01842	LOC5565049|-	Down	-0.356901	0.0803372	0.00042156
ISC/EB-1	Ctri01810		Down	-0.357876	0.153717	0.0209958
ISC/EB-1	Ctri01810		Down	-0.357876	0.153717	0.0209958
ISC/EB-1	Ctri05498	LOC5569496|AAEL007682	Down	-0.358544	0.0500148	3.30652e-05
ISC/EB-1	Ctri05498	LOC5569496|AAEL007682	Down	-0.358544	0.0500148	3.30652e-05
ISC/EB-1	Ctri08047	LOC5579108|AAEL003844	Down	-0.360425	0.0448907	3.42017e-05
ISC/EB-1	Ctri08047	LOC5579108|AAEL003844	Down	-0.360425	0.0448907	3.42017e-05
ISC/EB-1	Ctri01104	LOC5580055|AAEL022806	Down	-0.363211	0.0988465	0.00116427
ISC/EB-1	Ctri01104	LOC5580055|AAEL022806	Down	-0.363211	0.0988465	0.00116427
ISC/EB-1	Ctri09020	LOC5566220|AAEL005270	Down	-0.363333	0.07677	0.000383555
ISC/EB-1	Ctri09020	LOC5566220|AAEL005270	Down	-0.363333	0.07677	0.000383555
ISC/EB-1	Ctri10972	LOC5577813|AAEL013396	Down	-0.36515	0.167167	0.0277944
ISC/EB-1	Ctri10972	LOC5577813|AAEL013396	Down	-0.36515	0.167167	0.0277944
ISC/EB-1	Ctri09139	LOC5570461|AAEL008356	Down	-0.367173	0.159005	0.0235953
ISC/EB-1	Ctri09139	LOC5570461|AAEL008356	Down	-0.367173	0.159005	0.0235953
ISC/EB-1	Ctri06345	LOC5579659|AAEL003955	Down	-0.367338	0.175134	0.0367926
ISC/EB-1	Ctri06345	LOC5579659|AAEL003955	Down	-0.367338	0.175134	0.0367926
ISC/EB-1	Ctri07599	LOC5574962|AAEL011562	Down	-0.367783	0.0761542	0.000611581
ISC/EB-1	Ctri07599	LOC5574962|AAEL011562	Down	-0.367783	0.0761542	0.000611581
ISC/EB-1	Ctri08931		Down	-0.369325	0.097531	0.00147202
ISC/EB-1	Ctri08931		Down	-0.369325	0.097531	0.00147202
ISC/EB-1	Ctri05474	LOC5568228|AAEL006649	Down	-0.369675	0.0808405	0.000346583
ISC/EB-1	Ctri05474	LOC5568228|AAEL006649	Down	-0.369675	0.0808405	0.000346583
ISC/EB-1	Ctri01428	LOC5565190|AAEL014749	Down	-0.370005	0.0784412	0.000702306
ISC/EB-1	Ctri01428	LOC5565190|AAEL014749	Down	-0.370005	0.0784412	0.000702306
ISC/EB-1	Ctri02707	LOC5579964|AAEL007595	Down	-0.370259	0.0567224	3.39037e-05
[truncated: 22,630 more rows]
